# Supplementary material for: Identification of fatty acid-related subtypes, the establishment of a prognostic signature, and immune infiltration characteristics in lung adenocarcinoma
Source: Aging (Albany NY). 2023 May 16;15(10):4202–35. doi: 10.18632/aging.204725 (PMC10258028; doi:10.18632/aging.204725)
Supplement: Supplementary Table 1 [file aging-15-204725-s002.xlsx]

## Sheet: Sheet1
Supplementary Table 1. Clinical information of LUAD patients.
ID	OS_status	OS_time	Age	Sex	Stage	N	T	M
GSM1672281	Alive	3168	74	Female	NA	N0	T1	NA
GSM1672282	Alive	756	74	Female	NA	N0	T1	NA
GSM1672284	Alive	2076	82	Female	NA	N0	T1	NA
GSM1672286	Alive	2490	60	Female	NA	N0	T1	NA
GSM1672287	Alive	2076	54	Female	NA	N0	T1	NA
GSM1672288	Alive	813	63	Female	NA	N0	T1	NA
GSM1672289	Dead	174	63	Female	NA	N0	T1	NA
GSM1672291	Alive	2190	52	Female	NA	N0	T1	NA
GSM1672292	Dead	1044	62	Female	NA	N0	T1	NA
GSM1672293	Dead	828	60	Male	NA	N0	T1	NA
GSM1672298	Dead	1836	75	Female	NA	N0	T1	NA
GSM1672300	Dead	3864	75	Female	NA	N0	T1	NA
GSM1672308	Dead	1770	59	Male	NA	N0	T1	NA
GSM1672314	Alive	2154	65	Male	NA	N0	T1	NA
GSM1672315	Alive	2520	69	Male	NA	N0	T1	NA
GSM1672319	Alive	3315	60	Male	NA	N0	T1	NA
GSM1672320	Alive	4008	42	Male	NA	N0	T1	NA
GSM1672322	Alive	1563	69	Female	NA	N0	T1	NA
GSM1672325	Alive	2604	62	Female	NA	N0	T1	NA
GSM1672329	Dead	570	72	Male	NA	N0	T1	NA
GSM1672330	Dead	2523	65	Male	NA	N0	T1	NA
GSM1672331	Alive	4599	65	Female	NA	N0	T1	NA
GSM1672333	Alive	4878	62	Female	NA	N0	T1	NA
GSM1672335	Dead	3975	54	Female	NA	N0	T1	NA
GSM1672336	Alive	3924	57	Female	NA	N0	T1	NA
GSM1672337	Alive	4788	59	Female	NA	N0	T1	NA
GSM1672338	Alive	4731	48	Female	NA	N0	T1	NA
GSM1672339	Alive	2289	44	Female	NA	N0	T1	NA
GSM1672340	Alive	3177	40	Female	NA	N0	T1	NA
GSM1672343	Dead	2385	67	Male	NA	N0	T1	NA
GSM1672344	Alive	2469	62	Female	NA	N0	T1	NA
GSM1672346	Alive	5043	46	Male	NA	N0	T1	NA
GSM1672349	Alive	2850	53	Female	NA	N0	T1	NA
GSM1672352	Dead	627	85	Female	NA	N0	T1	NA
GSM1672355	Alive	1089	81	Male	NA	N0	T1	NA
GSM1672358	Alive	1143	57	Female	NA	N0	T1	NA
GSM1672359	Dead	1626	76	Female	NA	N0	T1	NA
GSM1672361	Alive	1596	62	Female	NA	N0	T1	NA
GSM1672363	Alive	885	73	Male	NA	N0	T1	NA
GSM1672366	Alive	654	70	Male	NA	N0	T1	NA
GSM1672367	Alive	1674	78	Male	NA	N0	T1	NA
GSM1672371	Alive	1824	72	Male	NA	N0	T1	NA
GSM1672372	Dead	636	81	Female	NA	N0	T1	NA
GSM1672380	Dead	1647.9	62	Male	NA	N0	T1	NA
GSM1672382	Alive	1766.4	68	Male	NA	N0	T1	NA
GSM1672384	Dead	644.4	63	Male	NA	N0	T1	NA
GSM1672387	Alive	1924.2	77	Female	NA	N0	T1	NA
GSM1672391	Alive	2071.5	70	Female	NA	N0	T1	NA
GSM1672392	Alive	1689.6	75	Female	NA	N0	T1	NA
GSM1672393	Alive	1837.5	49	Female	NA	N0	T1	NA
GSM1672394	Alive	1512.9	51	Female	NA	N0	T1	NA
GSM1672395	Alive	2200.8	66	Male	NA	N0	T1	NA
GSM1672397	Alive	2184	78	Female	NA	N0	T1	NA
GSM1672398	Dead	597	76	Male	NA	N0	T1	NA
GSM1672400	Dead	1359.9	73	Male	NA	N0	T1	NA
GSM1672401	Alive	2518.5	72	Female	NA	N0	T1	NA
GSM1672406	Alive	2207.7	55	Female	NA	N0	T1	NA
GSM1672408	Alive	2238.3	70	Female	NA	N0	T1	NA
GSM1672410	Dead	67.2	43	Male	NA	N0	T1	NA
GSM1672412	Alive	2766	69	Female	NA	N0	T1	NA
GSM1672415	Dead	1261.2	62	Male	NA	N0	T1	NA
GSM1672416	Dead	366	70	Male	NA	N0	T1	NA
GSM1672424	Alive	1410	70	Female	NA	N0	T1	NA
GSM1672429	Alive	2100	65	Female	NA	N0	T1	NA
GSM1672431	Alive	2760	65	Male	NA	N0	T1	NA
GSM1672432	Alive	1950	62	Male	NA	N0	T1	NA
GSM1672434	Alive	2070	82	Female	NA	N0	T1	NA
GSM1672441	Alive	1980	73	Male	NA	N0	T1	NA
GSM1672446	Alive	450	50	Female	NA	N0	T1	NA
GSM1672451	Alive	1860	76	Male	NA	N0	T1	NA
GSM1672461	Alive	1800	57	Female	NA	N0	T1	NA
GSM1672466	Alive	930	58	Male	NA	N0	T1	NA
GSM1672470	Dead	1440	61	Female	NA	N0	T1	NA
GSM1672472	Alive	2730	46	Female	NA	N0	T1	NA
GSM1672475	Alive	2400	54	Male	NA	N0	T1	NA
GSM1672481	Alive	1890	70	Female	NA	N0	T1	NA
GSM1672482	Alive	2040	76	Male	NA	N0	T1	NA
GSM1672483	Alive	210	81	Female	NA	N0	T1	NA
GSM1672485	Alive	1080	53	Female	NA	N0	T1	NA
GSM1672500	Dead	720	51	Female	NA	N0	T1	NA
GSM1672501	Alive	1320	63	Female	NA	N0	T1	NA
GSM1672502	Alive	900	80	Female	NA	N0	T1	NA
GSM1672504	Alive	2640	58	Female	NA	N0	T1	NA
GSM1672506	Alive	1380	67	Female	NA	N0	T1	NA
GSM1672507	Alive	1680	71	Female	NA	N0	T1	NA
GSM1672508	Alive	1200	61	Female	NA	N0	T1	NA
GSM1672511	Alive	1650	43	Female	NA	N0	T1	NA
GSM1672519	Dead	1440	64	Female	NA	N0	T1	NA
GSM1672525	Alive	1920	74	Male	NA	N0	T1	NA
GSM1672530	Dead	1110	59	Male	NA	N0	T1	NA
GSM1672572	Dead	1680	68	Female	NA	N0	T1	NA
GSM1672575	Alive	840	68	Male	NA	N0	T1	NA
GSM1672577	Alive	1200	56	Female	NA	N0	T1	NA
GSM1672579	Alive	1200	51	Female	NA	N0	T1	NA
GSM1672580	Dead	690	68	Female	NA	N0	T1	NA
GSM1672582	Dead	1020	62	Female	NA	N0	T1	NA
GSM1672586	Alive	1590	57	Female	NA	N0	T1	NA
GSM1672587	Alive	1890	55	Female	NA	N0	T1	NA
GSM1672595	Alive	2520	75	Male	NA	N0	T1	NA
GSM1672598	Alive	2400	54	Male	NA	N0	T1	NA
GSM1672619	Dead	3179.7	77	Female	NA	N0	T1	NA
GSM1672624	Dead	2880	87	Female	NA	N0	T1	NA
GSM1672629	Dead	1836.3	81	Male	NA	N0	T1	NA
GSM1672637	Alive	2824.8	70	Male	NA	N0	T1	NA
GSM1672647	Dead	2569.5	73	Female	NA	N0	T1	NA
GSM1672650	Alive	2475	66	Female	NA	N0	T1	NA
GSM1672668	Dead	656.4	70	Male	NA	N0	T1	NA
GSM1672673	Alive	1170.9	77	Female	NA	N0	T1	NA
GSM1672687	Dead	921	62	Male	NA	N0	T1	NA
GSM1672693	Dead	906	58	Male	NA	N0	T1	NA
GSM1672698	Dead	2211	69	Male	NA	N0	T1	NA
GSM1672700	Dead	585	77	Male	NA	N0	T1	NA
GSM1672707	Dead	3615	62	Male	NA	N0	T1	NA
GSM1672717	Dead	276	68	Male	NA	N0	T1	NA
GSM1672321	Dead	2115	56	Male	NA	N1	T1	NA
GSM1672353	Dead	669	60	Female	NA	N1	T1	NA
GSM1672360	Dead	2883	60	Female	NA	N1	T1	NA
GSM1672364	Alive	3225	65	Female	NA	N1	T1	NA
GSM1672369	Dead	219	78	Male	NA	N1	T1	NA
GSM1672411	Dead	265.5	52	Female	NA	N1	T1	NA
GSM1672427	Alive	1980	57	Male	NA	N1	T1	NA
GSM1672460	Dead	960	67	Male	NA	N1	T1	NA
GSM1672514	Dead	300	79	Female	NA	N1	T1	NA
GSM1672532	Alive	1200	43	Male	NA	N1	T1	NA
GSM1672538	Dead	2850	70	Female	NA	N1	T1	NA
GSM1672557	Dead	1320	61	Male	NA	N1	T1	NA
GSM1672563	Dead	1920	61	Male	NA	N1	T1	NA
GSM1672570	Alive	2220	68	Male	NA	N1	T1	NA
GSM1672597	Dead	750	59	Female	NA	N1	T1	NA
GSM1672616	Dead	1704	79	Male	NA	N1	T1	NA
GSM1672625	Dead	1239.9	62	Female	NA	N1	T1	NA
GSM1672691	Dead	1275	57	Male	NA	N1	T1	NA
GSM1672694	Dead	2355	72	Male	NA	N1	T1	NA
GSM1672699	Dead	99	77	Male	NA	N1	T1	NA
GSM1672710	Alive	1569	46	Female	NA	N1	T1	NA
GSM1672711	Alive	2082	63	Female	NA	N1	T1	NA
GSM1672712	Dead	778.5	60	Male	NA	N1	T1	NA
GSM1672722	Alive	5277	65	Male	NA	N1	T1	NA
GSM1672305	Dead	489	63	Male	NA	N2	T1	NA
GSM1672306	Dead	888	74	Female	NA	N2	T1	NA
GSM1672311	Dead	504	78	Female	NA	N2	T1	NA
GSM1672342	Dead	216	69	Male	NA	N2	T1	NA
GSM1672347	Dead	447	77	Male	NA	N2	T1	NA
GSM1672468	Alive	3450	49	Female	NA	N2	T1	NA
GSM1672491	Dead	1530	48	Female	NA	N2	T1	NA
GSM1672497	Dead	990	63	Female	NA	N2	T1	NA
GSM1672685	Dead	546	65	Male	NA	N2	T1	NA
GSM1672696	Dead	1956	64	Male	NA	N2	T1	NA
GSM1672716	Dead	435	70	Male	NA	N2	T1	NA
GSM1672645	Alive	2533.2	71	Male	NA	NA	T1	NA
GSM1672283	Dead	1944	74	Female	NA	N0	T2	NA
GSM1672285	Dead	1017	59	Female	NA	N0	T2	NA
GSM1672294	Dead	1464	66	Female	NA	N0	T2	NA
GSM1672295	Alive	1998	61	Female	NA	N0	T2	NA
GSM1672296	Dead	303	68	Female	NA	N0	T2	NA
GSM1672297	Dead	261	48	Female	NA	N0	T2	NA
GSM1672299	Alive	3966	50	Female	NA	N0	T2	NA
GSM1672301	Dead	1314	72	Female	NA	N0	T2	NA
GSM1672307	Dead	2436	76	Male	NA	N0	T2	NA
GSM1672312	Alive	1860	75	Male	NA	N0	T2	NA
GSM1672313	Dead	1869	61	Male	NA	N0	T2	NA
GSM1672316	Dead	558	73	Male	NA	N0	T2	NA
GSM1672317	Dead	1374	51	Male	NA	N0	T2	NA
GSM1672318	Dead	618	63	Female	NA	N0	T2	NA
GSM1672326	Alive	3102	65	Male	NA	N0	T2	NA
GSM1672327	Alive	3528	73	Female	NA	N0	T2	NA
GSM1672332	Alive	4617	59	Female	NA	N0	T2	NA
GSM1672334	Alive	1914	63	Male	NA	N0	T2	NA
GSM1672345	Alive	3036	60	Male	NA	N0	T2	NA
GSM1672350	Alive	1872	51	Male	NA	N0	T2	NA
GSM1672365	Alive	1611	63	Male	NA	N0	T2	NA
GSM1672370	Alive	4797	66	Male	NA	N0	T2	NA
GSM1672373	Alive	1608	69	Female	NA	N0	T2	NA
GSM1672375	Alive	1418.1	76	Female	NA	N0	T2	NA
GSM1672376	Dead	1773.3	70	Male	NA	N0	T2	NA
GSM1672377	Alive	1547.4	58	Male	NA	N0	T2	NA
GSM1672378	Dead	1087.5	48	Female	NA	N0	T2	NA
GSM1672383	Alive	1554.3	58	Male	NA	N0	T2	NA
GSM1672386	Dead	2070.3	57	Female	NA	N0	T2	NA
GSM1672390	Alive	1690.5	73	Male	NA	N0	T2	NA
GSM1672396	Alive	2002.2	76	Female	NA	N0	T2	NA
GSM1672403	Alive	2336.7	64	Female	NA	N0	T2	NA
GSM1672404	Alive	335.4	53	Female	NA	N0	T2	NA
GSM1672407	Dead	350.4	67	Male	NA	N0	T2	NA
GSM1672409	Dead	958.2	72	Female	NA	N0	T2	NA
GSM1672413	Alive	2702.1	33	Female	NA	N0	T2	NA
GSM1672418	Dead	2880	46	Male	NA	N0	T2	NA
GSM1672420	Dead	2058	60	Male	NA	N0	T2	NA
GSM1672421	Dead	1440	75	Male	NA	N0	T2	NA
GSM1672423	Alive	2160	62	Male	NA	N0	T2	NA
GSM1672428	Alive	1320	81	Female	NA	N0	T2	NA
GSM1672435	Dead	1200	68	Male	NA	N0	T2	NA
GSM1672437	Dead	870	82	Female	NA	N0	T2	NA
GSM1672439	Alive	2310	68	Male	NA	N0	T2	NA
GSM1672443	Alive	990	62	Male	NA	N0	T2	NA
GSM1672444	Alive	2550	51	Male	NA	N0	T2	NA
GSM1672445	Alive	1980	62	Male	NA	N0	T2	NA
GSM1672447	Alive	2730	65	Male	NA	N0	T2	NA
GSM1672448	Dead	2040	74	Male	NA	N0	T2	NA
GSM1672457	Dead	420	74	Female	NA	N0	T2	NA
GSM1672459	Alive	990	66	Female	NA	N0	T2	NA
GSM1672462	Alive	1500	64	Male	NA	N0	T2	NA
GSM1672463	Dead	450	59	Female	NA	N0	T2	NA
GSM1672464	Alive	1110	76	Female	NA	N0	T2	NA
GSM1672465	Alive	1620	82	Female	NA	N0	T2	NA
GSM1672467	Alive	1140	65	Male	NA	N0	T2	NA
GSM1672473	Dead	6120	74	Female	NA	N0	T2	NA
GSM1672477	Alive	1800	69	Female	NA	N0	T2	NA
GSM1672479	Dead	1860	76	Female	NA	N0	T2	NA
GSM1672484	Dead	1560	61	Female	NA	N0	T2	NA
GSM1672488	Alive	1230	61	Male	NA	N0	T2	NA
GSM1672492	Alive	1500	65	Female	NA	N0	T2	NA
GSM1672493	Dead	1710	70	Female	NA	N0	T2	NA
GSM1672494	Dead	390	79	Female	NA	N0	T2	NA
GSM1672495	Dead	2340	67	Male	NA	N0	T2	NA
GSM1672496	Alive	1440	77	Male	NA	N0	T2	NA
GSM1672498	Alive	1110	76	Female	NA	N0	T2	NA
GSM1672505	Alive	1260	62	Female	NA	N0	T2	NA
GSM1672513	Alive	1080	54	Female	NA	N0	T2	NA
GSM1672515	Dead	690	61	Male	NA	N0	T2	NA
GSM1672516	Alive	1860	74	Male	NA	N0	T2	NA
GSM1672518	Dead	1410	68	Female	NA	N0	T2	NA
GSM1672521	Alive	1290	57	Male	NA	N0	T2	NA
GSM1672522	Alive	1230	57	Female	NA	N0	T2	NA
GSM1672523	Alive	1290	67	Male	NA	N0	T2	NA
GSM1672526	Alive	3210	59	Male	NA	N0	T2	NA
GSM1672527	Dead	750	75	Male	NA	N0	T2	NA
GSM1672528	Alive	2880	60	Female	NA	N0	T2	NA
GSM1672529	Alive	2940	41	Female	NA	N0	T2	NA
GSM1672531	Alive	2700	60	Female	NA	N0	T2	NA
GSM1672533	Dead	2130	54	Male	NA	N0	T2	NA
GSM1672535	Alive	3300	47	Male	NA	N0	T2	NA
GSM1672536	Alive	3300	55	Female	NA	N0	T2	NA
GSM1672537	Dead	180	66	Female	NA	N0	T2	NA
GSM1672539	Dead	1140	68	Male	NA	N0	T2	NA
GSM1672540	Dead	270	61	Female	NA	N0	T2	NA
GSM1672541	Alive	2610	60	Female	NA	N0	T2	NA
GSM1672542	Alive	2640	35	Male	NA	N0	T2	NA
GSM1672545	Alive	1770	73	Female	NA	N0	T2	NA
GSM1672546	Alive	1650	38	Female	NA	N0	T2	NA
GSM1672547	Alive	1080	58	Male	NA	N0	T2	NA
GSM1672548	Dead	450	65	Male	NA	N0	T2	NA
GSM1672549	Alive	2550	66	Female	NA	N0	T2	NA
GSM1672552	Dead	2370	53	Male	NA	N0	T2	NA
GSM1672553	Alive	3150	60	Male	NA	N0	T2	NA
GSM1672554	Alive	2910	40	Female	NA	N0	T2	NA
GSM1672556	Dead	1080	62	Male	NA	N0	T2	NA
GSM1672560	Alive	2700	51	Female	NA	N0	T2	NA
GSM1672561	Alive	2550	53	Female	NA	N0	T2	NA
GSM1672564	Dead	1950	52	Female	NA	N0	T2	NA
GSM1672565	Alive	2040	60	Male	NA	N0	T2	NA
GSM1672567	Alive	1890	46	Female	NA	N0	T2	NA
GSM1672574	Alive	1470	68	Female	NA	N0	T2	NA
GSM1672576	Alive	1080	57	Female	NA	N0	T2	NA
GSM1672578	Alive	1110	56	Male	NA	N0	T2	NA
GSM1672581	Alive	2280	61	Male	NA	N0	T2	NA
GSM1672583	Alive	1980	73	Male	NA	N0	T2	NA
GSM1672585	Dead	210	72	Male	NA	N0	T2	NA
GSM1672588	Alive	690	64	Male	NA	N0	T2	NA
GSM1672589	Alive	1860	40	Female	NA	N0	T2	NA
GSM1672591	Alive	780	60	Male	NA	N0	T2	NA
GSM1672592	Alive	1200	58	Female	NA	N0	T2	NA
GSM1672593	Alive	900	64	Male	NA	N0	T2	NA
GSM1672594	Alive	1200	62	Male	NA	N0	T2	NA
GSM1672596	Dead	540	76	Male	NA	N0	T2	NA
GSM1672600	Alive	960	70	Female	NA	N0	T2	NA
GSM1672601	Alive	3150	68	Female	NA	N0	T2	NA
GSM1672603	Alive	2250	75	Male	NA	N0	T2	NA
GSM1672604	Alive	2910	64	Male	NA	N0	T2	NA
GSM1672606	Dead	960	69	Male	NA	N0	T2	NA
GSM1672608	Dead	1348.2	66	Female	NA	N0	T2	NA
GSM1672609	Dead	1042.8	79	Male	NA	N0	T2	NA
GSM1672610	Dead	595.2	72	Female	NA	N0	T2	NA
GSM1672615	Alive	3699	40	Male	NA	N0	T2	NA
GSM1672621	Dead	625.8	49	Male	NA	N0	T2	NA
GSM1672623	Dead	2225.4	66	Male	NA	N0	T2	NA
GSM1672627	Dead	12.9	77	Male	NA	N0	T2	NA
GSM1672628	Dead	496.8	61	Female	NA	N0	T2	NA
GSM1672631	Dead	2118	67	Female	NA	N0	T2	NA
GSM1672633	Dead	526.2	64	Female	NA	N0	T2	NA
GSM1672634	Dead	826.8	65	Female	NA	N0	T2	NA
GSM1672636	Alive	2331	66	Female	NA	N0	T2	NA
GSM1672638	Alive	2202	66	Female	NA	N0	T2	NA
GSM1672639	Dead	1357.2	70	Male	NA	N0	T2	NA
GSM1672640	Dead	0.9	63	Male	NA	N0	T2	NA
GSM1672641	Dead	2271.9	68	Female	NA	N0	T2	NA
GSM1672642	Dead	1171.8	76	Male	NA	N0	T2	NA
GSM1672649	Dead	1180.8	64	Male	NA	N0	T2	NA
GSM1672655	Dead	1437	82	Female	NA	N0	T2	NA
GSM1672656	Alive	1765.2	70	Male	NA	N0	T2	NA
GSM1672657	Alive	2446.2	75	Male	NA	N0	T2	NA
GSM1672658	Dead	735.3	63	Female	NA	N0	T2	NA
GSM1672659	Dead	210.9	81	Female	NA	N0	T2	NA
GSM1672661	Dead	1206.3	60	Female	NA	N0	T2	NA
GSM1672662	Alive	2000.7	60	Female	NA	N0	T2	NA
GSM1672663	Dead	1229.1	71	Female	NA	N0	T2	NA
GSM1672664	Alive	2283.6	73	Male	NA	N0	T2	NA
GSM1672665	Dead	2179.2	77	Male	NA	N0	T2	NA
GSM1672670	Alive	2161.5	60	Male	NA	N0	T2	NA
GSM1672672	Alive	1601.7	62	Female	NA	N0	T2	NA
GSM1672674	Dead	1566	82	Male	NA	N0	T2	NA
GSM1672675	Dead	473.1	73	Male	NA	N0	T2	NA
GSM1672679	Alive	4505.4	53	Male	NA	N0	T2	NA
GSM1672692	Dead	3672	69	Male	NA	N0	T2	NA
GSM1672695	Dead	2196	47	Male	NA	N0	T2	NA
GSM1672703	Alive	3894	67	Male	NA	N0	T2	NA
GSM1672705	Dead	3162	78	Male	NA	N0	T2	NA
GSM1672706	Dead	4725	46	Male	NA	N0	T2	NA
GSM1672708	Dead	1434	66	Male	NA	N0	T2	NA
GSM1672713	Alive	3654	77	Male	NA	N0	T2	NA
GSM1672718	Dead	570	66	Male	NA	N0	T2	NA
GSM1672721	Alive	2928	81	Male	NA	N0	T2	NA
GSM1672328	Dead	3474	52	Female	NA	N1	T2	NA
GSM1672351	Alive	1929	63	Female	NA	N1	T2	NA
GSM1672354	Dead	2037	58	Male	NA	N1	T2	NA
GSM1672356	Dead	681	52	Female	NA	N1	T2	NA
GSM1672357	Alive	987	81	Female	NA	N1	T2	NA
GSM1672362	Dead	375	68	Male	NA	N1	T2	NA
GSM1672368	Dead	630	54	Male	NA	N1	T2	NA
GSM1672385	Dead	191.4	78	Male	NA	N1	T2	NA
GSM1672426	Dead	1170	56	Female	NA	N1	T2	NA
GSM1672449	Alive	990	55	Female	NA	N1	T2	NA
GSM1672454	Dead	600	70	Male	NA	N1	T2	NA
GSM1672456	Alive	2790	67	Female	NA	N1	T2	NA
GSM1672458	Alive	3000	59	Female	NA	N1	T2	NA
GSM1672474	Alive	1500	51	Female	NA	N1	T2	NA
GSM1672478	Alive	780	63	Female	NA	N1	T2	NA
GSM1672480	Alive	660	72	Female	NA	N1	T2	NA
GSM1672486	Dead	450	72	Female	NA	N1	T2	NA
GSM1672487	Dead	600	53	Female	NA	N1	T2	NA
GSM1672490	Alive	1260	74	Female	NA	N1	T2	NA
GSM1672499	Dead	510	72	Male	NA	N1	T2	NA
GSM1672503	Alive	1500	74	Female	NA	N1	T2	NA
GSM1672510	Alive	1290	72	Female	NA	N1	T2	NA
GSM1672520	Alive	1710	58	Female	NA	N1	T2	NA
GSM1672524	Alive	960	75	Female	NA	N1	T2	NA
GSM1672534	Dead	270	52	Female	NA	N1	T2	NA
GSM1672543	Alive	2220	53	Female	NA	N1	T2	NA
GSM1672544	Dead	240	54	Male	NA	N1	T2	NA
GSM1672550	Dead	270	66	Male	NA	N1	T2	NA
GSM1672551	Dead	330	76	Male	NA	N1	T2	NA
GSM1672555	Dead	120	67	Male	NA	N1	T2	NA
GSM1672558	Dead	2220	63	Male	NA	N1	T2	NA
GSM1672559	Dead	390	62	Male	NA	N1	T2	NA
GSM1672562	Dead	2130	56	Female	NA	N1	T2	NA
GSM1672566	Alive	1920	57	Male	NA	N1	T2	NA
GSM1672568	Dead	390	71	Male	NA	N1	T2	NA
GSM1672569	Alive	2850	53	Male	NA	N1	T2	NA
GSM1672571	Dead	1710	72	Female	NA	N1	T2	NA
GSM1672573	Alive	1440	65	Male	NA	N1	T2	NA
GSM1672584	Dead	870	63	Female	NA	N1	T2	NA
GSM1672599	Dead	360	74	Male	NA	N1	T2	NA
GSM1672605	Dead	540	79	Male	NA	N1	T2	NA
GSM1672607	Dead	300	77	Male	NA	N1	T2	NA
GSM1672622	Dead	828.9	62	Male	NA	N1	T2	NA
GSM1672630	Alive	3134.1	72	Female	NA	N1	T2	NA
GSM1672651	Alive	951	48	Male	NA	N1	T2	NA
GSM1672667	Dead	187.2	59	Female	NA	N1	T2	NA
GSM1672669	Alive	2365.5	58	Male	NA	N1	T2	NA
GSM1672671	Dead	847.5	72	Male	NA	N1	T2	NA
GSM1672676	Dead	829.8	57	Female	NA	N1	T2	NA
GSM1672677	Dead	890.1	73	Male	NA	N1	T2	NA
GSM1672681	Dead	742.2	71	Female	NA	N1	T2	NA
GSM1672682	Dead	494.7	36	Male	NA	N1	T2	NA
GSM1672701	Dead	252	70	Male	NA	N1	T2	NA
GSM1672709	Dead	3900	65	Male	NA	N1	T2	NA
GSM1672723	Dead	1359	61	Male	NA	N1	T2	NA
GSM1672302	Dead	177	72	Female	NA	N2	T2	NA
GSM1672304	Dead	528	58	Male	NA	N2	T2	NA
GSM1672309	Dead	2778	71	Male	NA	N2	T2	NA
GSM1672323	Dead	528	58	Female	NA	N2	T2	NA
GSM1672324	Dead	507	62	Male	NA	N2	T2	NA
GSM1672341	Dead	846	64	Male	NA	N2	T2	NA
GSM1672348	Dead	288	56	Male	NA	N2	T2	NA
GSM1672430	Alive	2250	73	Female	NA	N2	T2	NA
GSM1672433	Alive	1290	71	Male	NA	N2	T2	NA
GSM1672436	Dead	630	48	Female	NA	N2	T2	NA
GSM1672438	Dead	780	64	Male	NA	N2	T2	NA
GSM1672440	Dead	60	58	Male	NA	N2	T2	NA
GSM1672442	Dead	420	52	Female	NA	N2	T2	NA
GSM1672452	Dead	3420	64	Female	NA	N2	T2	NA
GSM1672453	Dead	120	58	Female	NA	N2	T2	NA
GSM1672455	Dead	1560	57	Female	NA	N2	T2	NA
GSM1672469	Alive	1080	71	Female	NA	N2	T2	NA
GSM1672471	Dead	570	75	Male	NA	N2	T2	NA
GSM1672476	Dead	1260	50	Female	NA	N2	T2	NA
GSM1672489	Dead	750	66	Male	NA	N2	T2	NA
GSM1672509	Alive	1140	38	Female	NA	N2	T2	NA
GSM1672512	Dead	510	65	Female	NA	N2	T2	NA
GSM1672612	Dead	15.9	79	Female	NA	N2	T2	NA
GSM1672613	Dead	1126.5	74	Female	NA	N2	T2	NA
GSM1672632	Dead	105.6	74	Female	NA	N2	T2	NA
GSM1672643	Dead	2328	49	Male	NA	N2	T2	NA
GSM1672644	Dead	68.1	61	Male	NA	N2	T2	NA
GSM1672653	Dead	173.4	68	Female	NA	N2	T2	NA
GSM1672683	Dead	268.2	68	Female	NA	N2	T2	NA
GSM1672686	Dead	2386.2	51	Female	NA	N2	T2	NA
GSM1672689	Dead	351	69	Male	NA	N2	T2	NA
GSM1672714	Dead	978	44	Male	NA	N2	T2	NA
GSM1672719	Alive	3636	74	Male	NA	N2	T2	NA
GSM1672720	Dead	270	62	Male	NA	N2	T2	NA
GSM1672290	Dead	1506	66	Male	NA	N0	T3	NA
GSM1672310	Dead	120	45	Female	NA	N0	T3	NA
GSM1672379	Dead	198	82	Male	NA	N0	T3	NA
GSM1672517	Alive	2550	80	Female	NA	N0	T3	NA
GSM1672590	Dead	210	75	Female	NA	N0	T3	NA
GSM1672602	Alive	2430	69	Male	NA	N0	T3	NA
GSM1672617	Dead	903.6	75	Female	NA	N0	T3	NA
GSM1672626	Dead	169.5	82	Male	NA	N0	T3	NA
GSM1672635	Dead	491.7	76	Male	NA	N0	T3	NA
GSM1672646	Dead	1265.4	60	Male	NA	N0	T3	NA
GSM1672648	Alive	2775.6	47	Male	NA	N0	T3	NA
GSM1672660	Dead	288.9	75	Female	NA	N0	T3	NA
GSM1672666	Dead	359.7	50	Male	NA	N0	T3	NA
GSM1672684	Dead	791.4	68	Female	NA	N0	T3	NA
GSM1672688	Dead	2427	72	Male	NA	N0	T3	NA
GSM1672697	Alive	4374	59	Male	NA	N0	T3	NA
GSM1672399	Dead	938.4	60	Female	NA	N1	T3	NA
GSM1672414	Dead	749.1	59	Male	NA	N1	T3	NA
GSM1672417	Dead	81	74	Male	NA	N1	T3	NA
GSM1672422	Dead	480	64	Male	NA	N1	T3	NA
GSM1672678	Dead	360.6	70	Female	NA	N1	T3	NA
GSM1672690	Dead	996	68	Male	NA	N1	T3	NA
GSM1672704	Dead	588	66	Male	NA	N1	T3	NA
GSM1672303	Dead	72	71	Male	NA	N2	T3	NA
GSM1672374	Alive	696	59	Male	NA	N2	T3	NA
GSM1672425	Dead	1560	67	Male	NA	N2	T3	NA
GSM1672450	Dead	720	54	Male	NA	N2	T3	NA
GSM1672680	Dead	464.1	75	Male	NA	N2	T3	NA
GSM1672381	Dead	292.2	82	Male	NA	N0	T4	NA
GSM1672388	Dead	967.2	86	Female	NA	N0	T4	NA
GSM1672402	Dead	378.9	55	Female	NA	N0	T4	NA
GSM1672405	Alive	915.9	77	Female	NA	N0	T4	NA
GSM1672419	Dead	1983	67	Male	NA	N0	T4	NA
GSM1672620	Dead	1332.6	66	Female	NA	N0	T4	NA
GSM1672702	Dead	807	57	Male	NA	N0	T4	NA
GSM1672652	Dead	1260.6	79	Male	NA	N1	T4	NA
GSM1672611	Dead	258.3	67	Male	NA	N2	T4	NA
GSM1672654	Dead	230.7	68	Female	NA	N2	T4	NA
GSM1672715	Dead	1206	49	Male	NA	N2	T4	NA
TCGA-05-4389	Alive	1369	70	Male	1	N0	T1	M0
TCGA-35-4122	Alive	225	69	Male	1	N0	T1	M0
TCGA-35-4123	Alive	182	38	Male	1	N0	T1	M0
TCGA-38-7271	Dead	800	72	Female	1	N0	T1	M0
TCGA-44-2655	Alive	1324	65	Female	1	N0	T1	M0
TCGA-44-2661	Alive	1159	69	Female	1	N0	T1	M0
TCGA-44-3398	Alive	1163	77	Female	1	N0	T1	M0
TCGA-44-3918	Alive	1036	60	Female	1	N0	T1	M0
TCGA-44-3919	Dead	1026	71	Female	1	N0	T1	M0
TCGA-44-6145	Alive	595	62	Female	1	N0	T1	M0
TCGA-44-6148	Alive	704	60	Male	1	N0	T1	M0
TCGA-44-6776	Alive	2616	60	Female	1	N0	T1	NA
TCGA-44-6778	Alive	1864	59	Male	1	N0	T1	NA
TCGA-44-7659	Alive	691	70	Male	1	N0	T1	NA
TCGA-44-7672	Alive	719	52	Female	1	N0	T1	M0
TCGA-44-A47G	Alive	351	73	Female	1	N0	T1	M0
TCGA-44-A4SS	Alive	415	73	Male	1	N0	T1	M0
TCGA-44-A4SU	Dead	409	67	Female	1	N0	T1	NA
TCGA-49-4486	Dead	2318	72	Male	1	N0	T1	M0
TCGA-49-4487	Dead	855	72	Female	1	N0	T1	M0
TCGA-49-4488	Dead	869	74	Female	1	N0	T1	NA
TCGA-49-4514	Alive	1700	79	Female	1	N0	T1	M0
TCGA-49-AAR0	Alive	4765	57	Male	1	N0	T1	NA
TCGA-49-AARE	Dead	1229	51	Female	1	N0	T1	NA
TCGA-49-AARN	Dead	1135	56	Female	1	N0	T1	NA
TCGA-49-AARO	Alive	3759	39	Female	1	N0	T1	NA
TCGA-49-AARR	Alive	4992	68	Male	1	N0	T1	NA
TCGA-4B-A93V	Dead	300	52	Female	1	N0	T1	M0
TCGA-50-5935	Dead	653	86	Female	1	N0	T1	M0
TCGA-50-5942	Alive	1847	67	Female	1	N0	T1	M0
TCGA-50-5944	Alive	1750	69	Female	1	N0	T1	M0
TCGA-50-5946	Alive	1617	62	Male	1	N0	T1	NA
TCGA-50-6673	Dead	22	84	Female	1	N0	T1	M0
TCGA-50-7109	Dead	308	60	Male	1	N0	T1	M0
TCGA-50-8457	Alive	1125	63	Female	1	N0	T1	M0
TCGA-50-8460	Alive	829	74	Male	1	N0	T1	M0
TCGA-55-1595	Alive	1479	74	Female	1	N0	T1	M0
TCGA-55-6543	Alive	435	60	Female	1	N0	T1	NA
TCGA-55-6968	Dead	1293	61	Male	4	N0	T1	M1
TCGA-55-6980	Alive	2109	56	Male	1	N0	T1	M0
TCGA-55-6987	Alive	2137	77	Male	1	N0	T1	M0
TCGA-55-7281	Alive	872	70	Female	1	N0	T1	M0
TCGA-55-7570	Alive	824	60	Male	1	N0	T1	NA
TCGA-55-7573	Alive	487	72	Female	1	N0	T1	NA
TCGA-55-7725	Alive	442	68	Female	1	N0	T1	NA
TCGA-55-7726	Alive	652	72	Female	1	N0	T1	NA
TCGA-55-7903	Alive	567	64	Male	1	N0	T1	NA
TCGA-55-7911	Alive	537	70	Female	1	N0	T1	NA
TCGA-55-7913	Dead	561	61	Female	1	N0	T1	NA
TCGA-55-7995	Alive	889	73	Female	1	N0	T1	M0
TCGA-55-8085	Alive	904	64	Male	1	N0	T1	M0
TCGA-55-8089	Dead	702	56	Male	1	N0	T1	M0
TCGA-55-8090	Dead	598	80	Male	1	N0	T1	M0
TCGA-55-8097	Alive	476	60	Female	1	N0	T1	NA
TCGA-55-8203	Alive	547	69	Female	1	N0	T1	M0
TCGA-55-8206	Alive	888	56	Male	1	N0	T1	M0
TCGA-55-8208	Alive	674	73	Female	1	N0	T1	M0
TCGA-55-8299	Dead	469	61	Female	1	N0	T1	NA
TCGA-55-8507	Alive	418	53	Male	1	N0	T1	NA
TCGA-55-8621	Alive	515	75	Female	1	N0	T1	NA
TCGA-55-A491	Alive	626	81	Female	1	N0	T1	NA
TCGA-55-A492	Alive	596	70	Female	1	N0	T1	NA
TCGA-55-A4DF	Dead	440	88	Male	1	N0	T1	NA
TCGA-55-A4DG	Alive	608	71	Male	1	N0	T1	NA
TCGA-55-A57B	Alive	546	80	Female	1	N0	T1	M0
TCGA-64-1676	Alive	1728	58	Male	1	N0	T1	M0
TCGA-64-1681	Dead	1167	61	Female	1	N0	T1	M0
TCGA-67-3770	Alive	610	70	Female	1	N0	T1	M0
TCGA-67-3771	Alive	610	77	Female	1	N0	T1	M0
TCGA-67-6216	Alive	141	57	Female	1	N0	T1	M0
TCGA-69-7763	Alive	690	69	Male	1	N0	T1	M0
TCGA-69-7764	Alive	414	75	Male	1	N0	T1	M0
TCGA-69-7980	Alive	411	70	Female	1	N0	T1	M0
TCGA-69-8255	Alive	129	71	Male	1	N0	T1	M0
TCGA-73-4662	Alive	2515	65	Female	1	N0	T1	M0
TCGA-73-4666	Alive	800	52	Female	4	N0	T1	M1
TCGA-73-7498	Alive	1189	58	Female	1	N0	T1	M0
TCGA-78-7162	Dead	3169	75	Male	1	N0	T1	M0
TCGA-78-8655	Alive	2360	77	Female	1	N0	T1	M0
TCGA-80-5608	Alive	2832	NA	Female	1	N0	T1	M0
TCGA-83-5908	Alive	824	59	Female	1	N0	T1	M0
TCGA-86-7953	Alive	997	69	Female	1	N0	T1	M0
TCGA-86-8076	Alive	993	42	Male	1	N0	T1	M0
TCGA-86-8668	Alive	423	61	Female	1	N0	T1	M0
TCGA-86-8669	Alive	938	64	Male	1	N0	T1	M0
TCGA-86-A456	Alive	896	78	Female	1	N0	T1	M0
TCGA-91-6828	Alive	323	70	Male	1	N0	T1	M0
TCGA-91-6835	Alive	79	81	Female	1	N0	T1	M0
TCGA-91-6840	Alive	372	59	Female	1	N0	T1	M0
TCGA-91-8497	Dead	434	75	Female	1	N0	T1	NA
TCGA-91-8499	Alive	36	76	Female	1	N0	T1	NA
TCGA-93-7347	Alive	683	76	Female	1	N0	T1	NA
TCGA-93-7348	Alive	531	75	Female	1	N0	T1	NA
TCGA-93-A4JO	Dead	33	70	Male	1	N0	T1	NA
TCGA-93-A4JQ	Alive	526	49	Male	1	N0	T1	NA
TCGA-95-7043	Dead	503	63	Female	1	N0	T1	NA
TCGA-95-7944	Alive	377	71	Male	1	N0	T1	M0
TCGA-95-7947	Alive	477	67	Male	1	N0	T1	M0
TCGA-95-8039	Alive	830	72	Male	1	N0	T1	NA
TCGA-97-7546	Alive	1285	76	Female	1	N0	T1	NA
TCGA-97-7553	Alive	1870	58	Female	1	N0	T1	NA
TCGA-97-7938	Dead	18	76	Female	1	N0	T1	NA
TCGA-97-7941	Alive	484	72	Female	1	N0	T1	NA
TCGA-97-8179	Alive	435	72	Male	1	N0	T1	M0
TCGA-97-8552	Alive	626	55	Female	1	N0	T1	NA
TCGA-97-A4M1	Alive	601	52	Female	1	N0	T1	M0
TCGA-97-A4M2	Alive	624	66	Male	1	N0	T1	M0
TCGA-97-A4M3	Alive	540	69	Female	1	N0	T1	M0
TCGA-97-A4M5	Alive	634	83	Male	1	N0	T1	M0
TCGA-97-A4M6	Alive	568	45	Female	1	N0	T1	M0
TCGA-97-A4M7	Alive	629	74	Male	1	N0	T1	M0
TCGA-99-8028	Alive	1118	50	Female	1	N0	T1	M0
TCGA-99-8032	Alive	44	61	Male	1	N0	T1	M0
TCGA-99-AA5R	Alive	658	70	Female	1	N0	T1	M0
TCGA-J2-A4AD	Dead	550	61	Female	1	N0	T1	NA
TCGA-J2-A4AE	Alive	1079	77	Female	1	N0	T1	NA
TCGA-J2-A4AG	Alive	988	66	Female	1	N0	T1	NA
TCGA-L4-A4E5	Alive	578	48	Female	1	N0	T1	M0
TCGA-L4-A4E6	Alive	435	67	Male	1	N0	T1	M0
TCGA-L9-A443	Dead	193	63	Female	1	N0	T1	NA
TCGA-L9-A444	Alive	307	60	Female	1	N0	T1	NA
TCGA-MN-A4N4	Alive	1175	57	Male	1	N0	T1	M0
TCGA-MN-A4N5	Alive	84	63	Male	1	N0	T1	M0
TCGA-MP-A4TA	Dead	950	75	Female	1	N0	T1	M0
TCGA-MP-A4TH	Alive	741	70	Female	1	N0	T1	M0
TCGA-MP-A4TJ	Dead	339	62	Female	1	N0	T1	M0
TCGA-NJ-A4YF	Alive	2161	50	Female	1	N0	T1	M0
TCGA-NJ-A4YQ	Alive	1432	69	Female	1	N0	T1	M0
TCGA-NJ-A55R	Alive	603	67	Male	1	N0	T1	NA
TCGA-O1-A52J	Dead	1798	74	Female	1	N0	T1	NA
TCGA-S2-AA1A	Alive	513	68	Female	1	N0	T1	M0
TCGA-05-5428	Alive	670	57	Male	2	N1	T1	M0
TCGA-38-4627	Dead	1147	64	Female	2	N1	T1	M0
TCGA-44-2659	Alive	1367	65	Female	2	N1	T1	M0
TCGA-44-7669	Dead	574	59	Male	2	N1	T1	NA
TCGA-44-7670	Alive	882	47	Female	2	N1	T1	M0
TCGA-49-AAQV	Dead	677	63	Female	2	N1	T1	NA
TCGA-50-5055	Dead	1830	79	Female	2	N1	T1	M0
TCGA-53-7626	Dead	929	76	Female	2	N1	T1	M0
TCGA-55-5899	Alive	930	58	Male	NA	N1	T1	M0
TCGA-55-7914	Dead	187	71	Female	2	N1	T1	NA
TCGA-55-8512	Dead	607	41	Male	4	N1	T1	M1
TCGA-55-8620	Dead	375	60	Male	4	N1	T1	M1
TCGA-55-A48X	Alive	689	63	Female	2	N1	T1	M0
TCGA-69-8253	Alive	426	59	Female	2	N1	T1	NA
TCGA-78-8640	Alive	7062	59	Male	2	N1	T1	M0
TCGA-86-6851	Alive	179	73	Female	2	N1	T1	M0
TCGA-86-8074	Alive	24	62	Female	2	N1	T1	M0
TCGA-91-6830	Alive	60	65	Female	2	N1	T1	NA
TCGA-91-A4BD	Alive	603	78	Male	2	N1	T1	NA
TCGA-L9-A50W	Dead	442	75	Male	2	N1	T1	NA
TCGA-NJ-A55O	Alive	13	56	Female	2	N1	T1	M0
TCGA-44-6774	Alive	658	56	Female	3	N2	T1	M0
TCGA-49-6743	Alive	1621	81	Female	3	N2	T1	NA
TCGA-49-6761	Alive	354	68	Female	3	N2	T1	NA
TCGA-50-6593	Dead	336	49	Female	3	N2	T1	M0
TCGA-55-6981	Dead	1379	53	Female	3	N2	T1	M0
TCGA-55-7727	Alive	119	70	Male	3	N2	T1	NA
TCGA-55-8505	Alive	440	62	Male	3	N2	T1	NA
TCGA-64-1679	Alive	2488	58	Female	3	N2	T1	M0
TCGA-86-7714	Dead	625	61	Female	3	N2	T1	M0
TCGA-86-A4P8	Alive	805	59	Female	3	N2	T1	NA
TCGA-MP-A4T6	Dead	1790	76	Female	3	N2	T1	NA
TCGA-MP-A4TC	Dead	74	77	Male	3	N2	T1	M0
TCGA-55-A48Z	Alive	651	60	Female	3	N3	T1	NA
TCGA-44-5645	Alive	852	61	Female	1	NA	T1	NA
TCGA-44-6147	Alive	845	67	Female	1	NA	T1	M0
TCGA-78-7159	Alive	1974	60	Female	1	NA	T1	M0
TCGA-05-4249	Alive	1523	67	Male	1	N0	T2	M0
TCGA-05-4382	Alive	607	68	Male	1	N0	T2	M0
TCGA-05-4390	Alive	1126	58	Female	1	N0	T2	M0
TCGA-05-4403	Alive	578	76	Male	1	N0	T2	M0
TCGA-05-4405	Alive	610	74	Female	1	N0	T2	M0
TCGA-05-4417	Alive	455	51	Female	1	N0	T2	M0
TCGA-05-4420	Alive	912	41	Male	1	N0	T2	M0
TCGA-05-4422	Alive	365	68	Male	1	N0	T2	M0
TCGA-05-4425	Alive	669	70	Female	4	N0	T2	M1
TCGA-05-4426	Alive	791	71	Male	1	N0	T2	M0
TCGA-05-4430	Alive	761	59	Female	1	N0	T2	M0
TCGA-05-4433	Alive	730	82	Male	1	N0	T2	M0
TCGA-05-5715	Alive	62	69	Female	1	N0	T2	M0
TCGA-35-3615	Alive	14	57	Male	1	N0	T2	M0
TCGA-38-4625	Alive	2973	66	Female	1	N0	T2	M0
TCGA-38-4626	Alive	3674	57	Female	NA	N0	T2	M0
TCGA-38-4630	Dead	1073	75	Female	1	N0	T2	M0
TCGA-38-4631	Dead	354	72	Female	1	N0	T2	M0
TCGA-38-A44F	Alive	133	80	Male	1	N0	T2	M0
TCGA-44-2656	Alive	1429	59	Male	1	N0	T2	M0
TCGA-44-2662	Alive	1280	65	Male	1	N0	T2	M0
TCGA-44-2666	Dead	97	43	Male	1	N0	T2	M0
TCGA-44-2668	Dead	761	51	Male	1	N0	T2	M0
TCGA-44-3917	Alive	1183	33	Female	1	N0	T2	M0
TCGA-44-4112	Dead	808	60	Female	1	N0	T2	M0
TCGA-44-5644	Alive	863	51	Female	1	N0	T2	NA
TCGA-44-6775	Alive	705	72	Female	1	N0	T2	NA
TCGA-44-7660	Alive	592	72	Male	1	N0	T2	NA
TCGA-44-7661	Dead	557	69	Female	1	N0	T2	M0
TCGA-44-7662	Alive	218	61	Male	1	N0	T2	NA
TCGA-44-7671	Alive	889	64	Male	1	N0	T2	M0
TCGA-44-8117	Alive	385	54	Female	1	N0	T2	M0
TCGA-44-8120	Alive	260	58	Male	1	N0	T2	M0
TCGA-44-A479	Alive	486	73	Female	1	N0	T2	NA
TCGA-44-A47A	Alive	466	78	Female	1	N0	T2	NA
TCGA-44-A47B	Alive	287	79	Male	1	N0	T2	M0
TCGA-49-4501	Dead	1421	67	Female	1	N0	T2	M0
TCGA-49-AAR2	Alive	2224	64	Male	1	N0	T2	NA
TCGA-49-AARQ	Alive	6732	41	Female	1	N0	T2	NA
TCGA-50-5049	Alive	3094	70	Male	1	N0	T2	M0
TCGA-50-5066	Alive	1442	72	Male	1	N0	T2	M0
TCGA-50-5931	Dead	434	75	Female	1	N0	T2	M0
TCGA-50-5939	Dead	460	85	Male	1	N0	T2	M0
TCGA-50-6590	Dead	1288	72	Female	1	N0	T2	M0
TCGA-50-6591	Dead	119	63	Female	4	N0	T2	M1
TCGA-50-6592	Dead	777	71	Female	1	N0	T2	M0
TCGA-50-6597	Dead	1268	79	Female	1	N0	T2	M0
TCGA-53-7624	Dead	1043	40	Female	4	N0	T2	M1
TCGA-55-1592	Dead	701	65	Male	1	N0	T2	M0
TCGA-55-6642	Alive	2449	63	Male	1	N0	T2	NA
TCGA-55-6969	Alive	1239	52	Male	1	N0	T2	M0
TCGA-55-6971	Alive	1400	59	Female	1	N0	T2	NA
TCGA-55-6972	Dead	1632	72	Male	1	N0	T2	M0
TCGA-55-6978	Dead	176	81	Male	2	N0	T2	NA
TCGA-55-6985	Alive	1233	58	Female	1	N0	T2	NA
TCGA-55-6986	Alive	3261	74	Female	1	N0	T2	M0
TCGA-55-7574	Dead	995	64	Female	1	N0	T2	M0
TCGA-55-7576	Alive	670	54	Male	1	N0	T2	M0
TCGA-55-7724	Alive	705	76	Female	1	N0	T2	NA
TCGA-55-7728	Alive	704	64	Female	1	N0	T2	NA
TCGA-55-7815	Alive	773	76	Male	1	N0	T2	NA
TCGA-55-7910	Alive	1040	50	Female	2	N0	T2	M0
TCGA-55-8087	Alive	462	59	Female	1	N0	T2	NA
TCGA-55-8091	Alive	600	74	Male	1	N0	T2	NA
TCGA-55-8094	Alive	541	51	Male	4	N0	T2	M1
TCGA-55-8096	Dead	719	67	Female	1	N0	T2	NA
TCGA-55-8204	Alive	515	87	Female	1	N0	T2	NA
TCGA-55-8205	Alive	599	76	Female	2	N0	T2	M0
TCGA-55-8207	Alive	977	73	Male	1	N0	T2	NA
TCGA-55-8301	Alive	534	58	Male	1	N0	T2	NA
TCGA-55-8302	Alive	478	54	Male	1	N0	T2	NA
TCGA-55-8510	Alive	539	55	Female	1	N0	T2	NA
TCGA-55-8511	Alive	552	73	Female	1	N0	T2	NA
TCGA-55-8514	Alive	520	70	Female	1	N0	T2	NA
TCGA-55-8614	Alive	536	76	Male	1	N0	T2	NA
TCGA-55-8616	Alive	48	58	Female	1	N0	T2	M0
TCGA-55-A48Y	Alive	630	69	Male	2	N0	T2	M0
TCGA-55-A490	Dead	99	78	Male	2	N0	T2	NA
TCGA-55-A493	Alive	28	54	Female	1	N0	T2	M0
TCGA-55-A494	Alive	481	61	Female	1	N0	T2	NA
TCGA-62-A46O	Dead	1454	65	Female	1	N0	T2	M0
TCGA-62-A46P	Dead	594	65	Male	1	N0	T2	M0
TCGA-62-A46R	Dead	1725	54	Female	1	N0	T2	M0
TCGA-62-A46S	Dead	1653	73	Male	1	N0	T2	M0
TCGA-62-A46V	Alive	2199	78	Female	1	N0	T2	M0
TCGA-62-A470	Dead	1194	84	Male	1	N0	T2	M0
TCGA-64-1678	Alive	1189	70	Female	NA	N0	T2	M0
TCGA-64-5774	Alive	2676	60	Male	1	N0	T2	M0
TCGA-64-5778	Alive	1305	60	Male	1	N0	T2	M0
TCGA-64-5781	Alive	1559	55	Female	1	N0	T2	M0
TCGA-67-3772	Alive	573	82	Female	1	N0	T2	M0
TCGA-67-3773	Alive	427	84	Female	1	N0	T2	M0
TCGA-67-3774	Alive	385	73	Female	1	N0	T2	M0
TCGA-67-6215	Alive	174	52	Female	1	N0	T2	M0
TCGA-69-7761	Alive	186	84	Male	1	N0	T2	NA
TCGA-69-7973	Alive	230	42	Female	1	N0	T2	M0
TCGA-69-7979	Alive	408	71	Female	1	N0	T2	NA
TCGA-71-6725	Alive	256	48	Female	1	N0	T2	M0
TCGA-71-8520	Dead	210	60	Female	1	N0	T2	M0
TCGA-73-4658	Dead	1600	80	Female	1	N0	T2	M0
TCGA-73-4670	Alive	131	69	Female	4	N0	T2	M1
TCGA-73-4677	Dead	38	74	Male	NA	N0	T2	M0
TCGA-73-7499	Dead	1531	81	Female	1	N0	T2	M0
TCGA-75-5146	Alive	2368	NA	Male	1	N0	T2	M0
TCGA-75-5147	Alive	1333	NA	Female	1	N0	T2	M0
TCGA-75-6206	Alive	2590	NA	Male	1	N0	T2	M0
TCGA-75-7025	Alive	3305	NA	Male	1	N0	T2	M0
TCGA-75-7027	Alive	3059	NA	Male	1	N0	T2	M0
TCGA-78-7143	Dead	4961	62	Female	1	N0	T2	M0
TCGA-78-7152	Dead	1215	65	Male	1	N0	T2	M0
TCGA-78-7153	Alive	3635	65	Female	1	N0	T2	M0
TCGA-78-7155	Dead	1171	68	Male	1	N0	T2	M0
TCGA-78-7163	Alive	7248	60	Male	1	N0	T2	M0
TCGA-78-7167	Dead	2681	77	Male	4	N0	T2	M1
TCGA-78-7535	Dead	949	45	Male	1	N0	T2	M0
TCGA-78-7537	Dead	1622	72	Male	1	N0	T2	M0
TCGA-78-7539	Alive	791	75	Female	2	N0	T2	M0
TCGA-78-7540	Dead	1197	66	Female	1	N0	T2	M0
TCGA-78-7542	Dead	321	56	Male	1	N0	T2	M0
TCGA-78-7633	Dead	1528	67	Male	1	N0	T2	M0
TCGA-78-8662	Dead	3361	53	Female	1	N0	T2	M0
TCGA-80-5611	Alive	2595	NA	Male	1	N0	T2	M0
TCGA-86-7701	Alive	947	66	Male	4	N0	T2	M1
TCGA-86-7713	Alive	1157	70	Male	2	N0	T2	M0
TCGA-86-7954	Alive	605	68	Female	1	N0	T2	M0
TCGA-86-7955	Alive	1072	62	Male	1	N0	T2	M0
TCGA-86-8073	Alive	740	58	Male	1	N0	T2	M0
TCGA-86-8075	Dead	694	66	Female	1	N0	T2	M0
TCGA-86-8280	Alive	701	54	Female	2	N0	T2	M0
TCGA-86-8358	Alive	653	44	Male	1	N0	T2	M0
TCGA-86-8585	Alive	353	57	Male	1	N0	T2	M0
TCGA-86-8673	Alive	862	61	Male	1	N0	T2	M0
TCGA-86-A4D0	Dead	116	48	Male	2	N0	T2	M0
TCGA-86-A4P7	Alive	415	63	Female	1	N0	T2	M0
TCGA-91-6829	Dead	1258	78	Male	1	N0	T2	NA
TCGA-91-6831	Alive	310	66	Male	1	N0	T2	NA
TCGA-91-6836	Alive	417	52	Female	1	N0	T2	NA
TCGA-91-6847	Alive	842	62	Female	1	N0	T2	NA
TCGA-91-A4BC	Alive	44	59	Male	2	N0	T2	NA
TCGA-93-8067	Alive	186	77	Male	1	N0	T2	NA
TCGA-93-A4JN	Alive	718	71	Male	4	N0	T2	M1
TCGA-95-7948	Alive	476	42	Female	1	N0	T2	M0
TCGA-97-7547	Alive	1965	67	Female	1	N0	T2	NA
TCGA-97-7552	Alive	1932	70	Male	1	N0	T2	NA
TCGA-97-7937	Alive	564	65	Male	1	N0	T2	NA
TCGA-97-8172	Alive	545	75	Female	1	N0	T2	M0
TCGA-97-8174	Dead	164	67	Male	2	N0	T2	M0
TCGA-97-8175	Alive	551	55	Female	1	N0	T2	M0
TCGA-97-8177	Alive	499	59	Female	1	N0	T2	M0
TCGA-97-A4LX	Alive	614	81	Male	1	N0	T2	M0
TCGA-97-A4M0	Alive	652	60	Female	1	N0	T2	M0
TCGA-L9-A8F4	Alive	476	64	Female	1	N0	T2	NA
TCGA-MP-A4SV	Dead	2620	67	Male	1	N0	T2	M0
TCGA-MP-A4T7	Dead	167	75	Female	4	N0	T2	M1
TCGA-MP-A4TE	Dead	896	56	Male	2	N0	T2	NA
TCGA-MP-A4TF	Dead	336	58	Female	2	N0	T2	M0
TCGA-MP-A5C7	Alive	2248	76	Female	1	N0	T2	M0
TCGA-NJ-A4YG	Alive	2261	65	Male	1	N0	T2	M0
TCGA-NJ-A4YP	Alive	50	52	Male	1	N0	T2	M0
TCGA-NJ-A55A	Alive	15	76	Female	1	N0	T2	M0
TCGA-05-4397	Dead	731	65	Male	2	N1	T2	M0
TCGA-05-4427	Alive	791	65	Female	2	N1	T2	M0
TCGA-05-4432	Alive	761	66	Male	2	N1	T2	M0
TCGA-05-5423	Alive	151	65	Male	2	N1	T2	M0
TCGA-05-5425	Alive	882	68	Male	2	N1	T2	M0
TCGA-38-4628	Dead	1492	65	Female	2	N1	T2	M0
TCGA-38-4632	Dead	1357	42	Male	4	N1	T2	M1
TCGA-44-2665	Alive	1301	55	Female	2	N1	T2	M0
TCGA-44-6779	Dead	500	50	Female	2	N1	T2	NA
TCGA-49-4505	Dead	428	61	Female	2	N1	T2	M0
TCGA-49-4506	Dead	999	68	Female	2	N1	T2	M0
TCGA-49-4510	Dead	896	51	Female	2	N1	T2	M0
TCGA-49-6742	Dead	488	70	Male	2	N1	T2	M0
TCGA-49-6744	Alive	1683	64	Female	2	N1	T2	NA
TCGA-49-AAR3	Alive	1893	69	Male	2	N1	T2	NA
TCGA-50-5045	Dead	2174	57	Female	NA	N1	T2	M0
TCGA-50-5068	Dead	1499	59	Female	2	N1	T2	NA
TCGA-50-5932	Dead	1235	75	Male	2	N1	T2	M0
TCGA-53-A4EZ	Alive	1071	63	Male	2	N1	T2	NA
TCGA-55-1596	Alive	2065	55	Male	2	N1	T2	M0
TCGA-55-6712	Dead	171	71	Male	2	N1	T2	NA
TCGA-55-6975	Dead	118	61	Male	2	N1	T2	M0
TCGA-55-6979	Dead	237	59	Female	2	N1	T2	M0
TCGA-55-6982	Dead	995	79	Female	2	N1	T2	M0
TCGA-55-6983	Alive	2823	81	Male	2	N1	T2	M0
TCGA-55-6984	Dead	760	71	Female	2	N1	T2	M0
TCGA-55-7907	Dead	343	77	Male	2	N1	T2	NA
TCGA-55-8508	Alive	617	60	Female	2	N1	T2	NA
TCGA-62-A46U	Alive	2067	71	Female	2	N1	T2	M0
TCGA-62-A471	Alive	1246	64	Male	2	N1	T2	M0
TCGA-64-5815	Alive	866	74	Male	2	N1	T2	M0
TCGA-67-6217	Alive	422	73	Female	2	N1	T2	M0
TCGA-69-7978	Alive	134	59	Male	2	N1	T2	NA
TCGA-73-4668	Alive	467	66	Female	2	N1	T2	M0
TCGA-73-4676	Dead	281	45	Male	2	N1	T2	M0
TCGA-75-5125	Dead	2027	NA	Male	2	N1	T2	M0
TCGA-75-6212	Dead	1516	NA	Female	2	N1	T2	M0
TCGA-78-7147	Dead	586	67	Female	2	N1	T2	M0
TCGA-78-7148	Dead	626	71	Male	2	N1	T2	M0
TCGA-78-7150	Dead	666	59	Male	2	N1	T2	M0
TCGA-78-7166	Dead	258	84	Male	2	N1	T2	M0
TCGA-78-8660	Dead	321	69	Male	2	N1	T2	M0
TCGA-86-6562	Dead	376	52	Male	2	N1	T2	M0
TCGA-86-7711	Dead	1046	70	Male	2	N1	T2	M0
TCGA-86-8054	Alive	1148	61	Male	2	N1	T2	M0
TCGA-86-8055	Dead	124	79	Male	2	N1	T2	M0
TCGA-86-8278	Alive	944	63	Female	2	N1	T2	M0
TCGA-86-8279	Alive	949	46	Male	2	N1	T2	M0
TCGA-86-8671	Alive	839	72	Female	2	N1	T2	M0
TCGA-86-8674	Alive	806	50	Male	2	N1	T2	M0
TCGA-95-7562	Dead	87	71	Male	2	N1	T2	M0
TCGA-95-7567	Alive	568	61	Male	2	N1	T2	M0
TCGA-95-8494	Alive	84	67	Male	2	N1	T2	M0
TCGA-95-A4VN	Alive	553	62	Female	2	N1	T2	M0
TCGA-J2-8192	Alive	739	65	Female	2	N1	T2	NA
TCGA-L9-A743	Alive	664	56	Male	2	N1	T2	M0
TCGA-L9-A7SV	Alive	565	69	Male	2	N1	T2	M0
TCGA-MN-A4N1	Alive	827	60	Male	2	N1	T2	M0
TCGA-MP-A4SW	Dead	1778	53	Male	2	N1	T2	M0
TCGA-MP-A4SY	Dead	1501	61	Male	2	N1	T2	M0
TCGA-MP-A4T4	Dead	2617	68	Female	2	N1	T2	M0
TCGA-MP-A4TI	Dead	429	72	Male	2	N1	T2	M0
TCGA-MP-A4TK	Dead	582	56	Female	2	N1	T2	NA
TCGA-05-4384	Alive	426	66	Male	3	N2	T2	M0
TCGA-05-5420	Alive	457	67	Male	3	N2	T2	M0
TCGA-35-5375	Alive	264	61	Male	3	N2	T2	M0
TCGA-38-6178	Alive	448	70	Female	3	N2	T2	NA
TCGA-44-3396	Alive	1130	74	Female	3	N2	T2	M0
TCGA-44-5643	Alive	1013	53	Male	3	N2	T2	M0
TCGA-49-4512	Dead	905	69	Female	3	N2	T2	NA
TCGA-49-6745	Alive	522	82	Male	3	N2	T2	M0
TCGA-49-AAR4	Dead	879	51	Male	3	N2	T2	NA
TCGA-50-5051	Dead	478	42	Female	3	N2	T2	M0
TCGA-50-5072	Dead	250	74	Male	3	N2	T2	M0
TCGA-50-5930	Dead	282	47	Male	3	N2	T2	M0
TCGA-50-5936	Dead	257	58	Male	3	N2	T2	M0
TCGA-50-5941	Alive	1474	55	Female	3	N2	T2	M0
TCGA-50-6595	Dead	189	74	Female	3	N2	T2	M0
TCGA-55-1594	Alive	1178	68	Male	3	N2	T2	M0
TCGA-55-6970	Dead	464	67	Female	3	N2	T2	NA
TCGA-62-8398	Dead	444	55	Male	3	N2	T2	M0
TCGA-62-8399	Alive	2696	62	Male	3	N2	T2	M0
TCGA-62-8402	Dead	1498	73	Female	3	N2	T2	M0
TCGA-62-A46Y	Dead	414	70	Female	3	N2	T2	M0
TCGA-64-1677	Dead	628	77	Female	3	N2	T2	M0
TCGA-64-1680	Alive	1126	63	Male	4	N2	T2	M1
TCGA-64-5779	Alive	864	61	Male	3	N2	T2	M0
TCGA-69-7974	Alive	184	54	Female	3	N2	T2	NA
TCGA-73-4659	Dead	711	66	Male	3	N2	T2	M0
TCGA-75-6214	Dead	1115	NA	Female	3	N2	T2	M0
TCGA-78-7146	Dead	173	71	Female	3	N2	T2	M0
TCGA-78-7220	Dead	807	53	Female	3	N2	T2	M0
TCGA-78-7536	Dead	244	69	Male	3	N2	T2	M0
TCGA-91-6848	Alive	224	59	Male	3	N2	T2	NA
TCGA-91-6849	Alive	35	75	Female	3	N2	T2	NA
TCGA-95-A4VK	Alive	651	74	Female	3	N2	T2	M0
TCGA-95-A4VP	Alive	605	66	Female	3	N2	T2	M0
TCGA-97-7554	Alive	775	83	Female	3	N2	T2	M0
TCGA-97-8171	Alive	568	81	Male	4	N2	T2	M1
TCGA-97-8547	Alive	657	78	Female	3	N2	T2	NA
TCGA-MP-A4T8	Dead	161	68	Male	3	N2	T2	M0
TCGA-MP-A4T9	Dead	1265	54	Female	3	N2	T2	NA
TCGA-MP-A4TD	Dead	307	71	Male	3	N2	T2	M0
TCGA-NJ-A4YI	Dead	4	87	Female	3	N2	T2	M0
TCGA-05-4402	Dead	244	57	Female	4	NA	T2	M1
TCGA-44-2657	Alive	1351	74	Female	1	NA	T2	M0
TCGA-44-6777	Dead	987	85	Female	1	NA	T2	NA
TCGA-69-8254	Alive	409	85	Male	NA	NA	T2	NA
TCGA-91-8496	Alive	505	63	Female	1	NA	T2	NA
TCGA-05-4424	Alive	913	70	Male	2	N0	T3	M0
TCGA-38-4629	Dead	864	68	Male	2	N0	T3	M0
TCGA-44-6146	Alive	728	64	Male	2	N0	T3	M0
TCGA-44-7667	Alive	1097	49	Female	2	N0	T3	NA
TCGA-44-8119	Alive	285	73	Male	2	N0	T3	M0
TCGA-49-6767	Alive	677	46	Female	2	N0	T3	NA
TCGA-49-AAR9	Dead	260	61	Male	2	N0	T3	NA
TCGA-50-8459	Alive	1119	68	Male	2	N0	T3	M0
TCGA-55-7284	Dead	243	74	Male	2	N0	T3	NA
TCGA-55-7994	Alive	603	81	Male	2	N0	T3	NA
TCGA-55-8092	Dead	154	75	Male	2	N0	T3	NA
TCGA-55-8506	Alive	11	62	Female	2	N0	T3	NA
TCGA-55-8513	Alive	791	77	Female	2	N0	T3	NA
TCGA-55-8619	Alive	416	72	Female	2	N0	T3	NA
TCGA-62-8395	Alive	1216	80	Female	2	N0	T3	M0
TCGA-62-8397	Alive	1289	70	Female	2	N0	T3	M0
TCGA-62-A472	Alive	910	70	Male	2	N0	T3	M0
TCGA-67-4679	Alive	448	69	Male	NA	N0	T3	M0
TCGA-69-7760	Alive	202	73	Male	2	N0	T3	M0
TCGA-69-8453	Alive	813	77	Male	2	N0	T3	NA
TCGA-69-A59K	Alive	591	60	Female	2	N0	T3	M0
TCGA-73-A9RS	Dead	340	41	Male	2	N0	T3	M0
TCGA-78-7161	Dead	291	69	Female	2	N0	T3	M0
TCGA-78-8648	Dead	1209	58	Female	2	N0	T3	M0
TCGA-86-8672	Dead	19	59	Male	2	N0	T3	M0
TCGA-86-A4JF	Dead	737	56	Male	2	N0	T3	M0
TCGA-91-7771	Alive	492	62	Male	2	N0	T3	NA
TCGA-95-7039	Alive	1272	54	Female	2	N0	T3	NA
TCGA-J2-8194	Alive	724	69	Female	2	N0	T3	NA
TCGA-05-4250	Dead	121	79	Female	3	N1	T3	M0
TCGA-49-4507	Dead	268	73	Female	3	N1	T3	M0
TCGA-55-7227	Dead	952	77	Male	3	N1	T3	NA
TCGA-73-4675	Dead	922	59	Male	3	N1	T3	M0
TCGA-97-8176	Dead	468	63	Male	3	N1	T3	M0
TCGA-05-4418	Dead	274	69	Male	3	N2	T3	M0
TCGA-05-5429	Dead	275	60	Male	3	N2	T3	M0
TCGA-49-4490	Dead	385	45	Female	3	N2	T3	M0
TCGA-49-4494	Dead	1081	77	Male	3	N2	T3	M0
TCGA-50-6594	Dead	370	79	Female	3	N2	T3	M0
TCGA-55-7283	Alive	609	76	Female	3	N2	T3	NA
TCGA-55-8615	Alive	446	67	Male	3	N2	T3	NA
TCGA-78-7154	Dead	593	72	Male	3	N2	T3	M0
TCGA-86-8359	Dead	444	52	Male	3	N2	T3	M0
TCGA-99-8025	Alive	1060	72	Female	3	N2	T3	M0
TCGA-L9-A5IP	Dead	58	40	Female	4	N2	T3	M1
TCGA-53-7813	Alive	424	51	Female	3	N0	T4	M0
TCGA-64-5775	Dead	62	71	Male	3	N0	T4	M0
TCGA-69-7765	Alive	165	56	Male	NA	N0	T4	NA
TCGA-78-7149	Alive	3940	71	Male	3	N0	T4	M0
TCGA-86-8056	Alive	139	63	Female	3	N0	T4	M0
TCGA-99-7458	Alive	747	74	Female	3	N0	T4	M0
TCGA-05-4396	Dead	303	76	Male	3	N1	T4	M0
TCGA-05-4434	Dead	457	67	Female	4	N1	T4	M1
TCGA-50-5044	Dead	624	72	Female	3	N1	T4	M0
TCGA-78-7145	Dead	826	52	Female	4	N1	T4	M1
TCGA-78-7156	Dead	976	62	Male	4	N1	T4	M1
TCGA-NJ-A7XG	Alive	617	49	Male	3	N1	T4	M0
TCGA-05-4415	Dead	91	57	Male	3	N2	T4	M0
TCGA-50-5933	Dead	2393	72	Male	3	N2	T4	M0
TCGA-62-8394	Dead	139	65	Female	3	N2	T4	M0
TCGA-78-7158	Dead	179	59	Female	3	N2	T4	M0
TCGA-78-7160	Dead	697	61	Male	4	N2	T4	M1
TCGA-05-4398	Alive	1431	47	Female	3	N3	T4	M0
GSM1672614	Alive	3197.4	50	Male	NA	NA	NA	NA
GSM1672618	Dead	399.9	64	Female	NA	NA	NA	NA
GSM1854798	Alive	1249	70	Female	4	NA	NA	NA
GSM1854799	Alive	1057	59	Female	2	NA	NA	NA
GSM1854800	Alive	1025	57	Male	1	NA	NA	NA
GSM1854801	Alive	895	72	Female	1	NA	NA	NA
GSM1854802	Dead	922	73	Female	1	NA	NA	NA
GSM1854803	Alive	959	49	Female	1	NA	NA	NA
GSM1854804	Alive	969	70	Male	1	NA	NA	NA
GSM1854805	Alive	833	71	Male	1	NA	NA	NA
GSM1854806	Alive	891	66	Male	1	NA	NA	NA
GSM1854807	Dead	524	68	Male	2	NA	NA	NA
GSM1854808	Alive	1035	86	Male	1	NA	NA	NA
GSM1854809	Alive	43	65	Female	1	NA	NA	NA
GSM1854810	Alive	925	78	Male	1	NA	NA	NA
GSM1854811	Alive	1053	85	Female	2	NA	NA	NA
GSM1854812	Alive	24	71	Female	1	NA	NA	NA
GSM1854813	Alive	825	66	Male	1	NA	NA	NA
GSM1854814	Alive	854	44	Male	2	NA	NA	NA
GSM1854815	Alive	820	73	Female	3	NA	NA	NA
GSM1854816	Alive	412	50	Male	3	NA	NA	NA
GSM1854817	Alive	297	80	Male	1	NA	NA	NA
GSM1854818	Alive	582	63	Female	1	NA	NA	NA
GSM1854819	Alive	28	67	Male	3	NA	NA	NA
GSM1854820	Alive	22	72	Female	1	NA	NA	NA
GSM1854821	Alive	1260	83	Male	2	NA	NA	NA
GSM1854822	Alive	1402	65	Male	1	NA	NA	NA
GSM1854823	Alive	799	57	Female	2	NA	NA	NA
GSM1854825	Alive	1329	54	Female	1	NA	NA	NA
GSM1854826	Alive	1488	69	Male	1	NA	NA	NA
GSM1854827	Alive	579	66	Female	1	NA	NA	NA
GSM1854828	Alive	1186	73	Female	3	NA	NA	NA
GSM1854829	Alive	1151	69	Male	3	NA	NA	NA
GSM1854830	Alive	1323	69	Female	3	NA	NA	NA
GSM1854831	Dead	314	77	Male	3	NA	NA	NA
GSM1854832	Alive	1110	63	Female	1	NA	NA	NA
GSM1854833	Alive	1494	79	Male	2	NA	NA	NA
GSM1854834	Alive	1024	66	Female	1	NA	NA	NA
GSM1854835	Alive	1134	44	Female	1	NA	NA	NA
GSM1854836	Dead	508	74	Male	1	NA	NA	NA
GSM1854837	Dead	46	78	Female	2	NA	NA	NA
GSM1854838	Dead	1231	50	Female	1	NA	NA	NA
GSM1854839	Alive	917	70	Female	4	NA	NA	NA
GSM1854840	Dead	488	72	Male	1	NA	NA	NA
GSM1854841	Alive	730	65	Female	1	NA	NA	NA
GSM1854842	Dead	1079	75	Female	3	NA	NA	NA
GSM1854843	Alive	1127	66	Male	1	NA	NA	NA
GSM1854844	Dead	193	52	Female	3	NA	NA	NA
GSM1854846	Alive	833	80	Female	1	NA	NA	NA
GSM1854847	Alive	708	56	Male	1	NA	NA	NA
GSM1854848	Alive	1240	61	Female	1	NA	NA	NA
GSM1854849	Alive	1465	77	Male	1	NA	NA	NA
GSM1854850	Alive	1685	86	Male	1	NA	NA	NA
GSM1854851	Alive	1949	63	Female	1	NA	NA	NA
GSM1854852	Alive	1569	76	Female	1	NA	NA	NA
GSM1854853	Alive	275	67	Male	1	NA	NA	NA
GSM1854854	Alive	1507	64	Male	1	NA	NA	NA
GSM1854855	Dead	307	84	Male	1	NA	NA	NA
GSM1854856	Dead	905	78	Female	3	NA	NA	NA
GSM1854857	Alive	1388	75	Female	1	NA	NA	NA
GSM1854859	Dead	814	74	Female	3	NA	NA	NA
GSM1854860	Dead	436	81	Male	4	NA	NA	NA
GSM1854861	Dead	73	67	Male	3	NA	NA	NA
GSM1854862	Alive	1596	73	Female	1	NA	NA	NA
GSM1854863	Alive	1488	71	Female	1	NA	NA	NA
GSM1854864	Dead	398	79	Female	3	NA	NA	NA
GSM1854865	Alive	1623	62	Male	2	NA	NA	NA
GSM1854866	Alive	1238	72	Female	1	NA	NA	NA
GSM1854867	Alive	1481	64	Male	1	NA	NA	NA
GSM1854868	Dead	430	66	Male	2	NA	NA	NA
GSM1854869	Alive	771	65	Male	1	NA	NA	NA
GSM1854870	Alive	1109	47	Male	1	NA	NA	NA
GSM1854871	Alive	1120	78	Female	2	NA	NA	NA
GSM1854872	Alive	844	76	Female	1	NA	NA	NA
GSM1854873	Alive	1086	68	Male	1	NA	NA	NA
GSM1854874	Dead	871	72	Female	2	NA	NA	NA
GSM1854875	Alive	1063	64	Male	2	NA	NA	NA
GSM1854876	Alive	907	74	Female	2	NA	NA	NA
GSM1854877	Alive	776	83	Female	1	NA	NA	NA
GSM1854879	Alive	974	81	Female	4	NA	NA	NA
GSM1854880	Alive	852	80	Female	1	NA	NA	NA
GSM1854881	Dead	732	76	Male	2	NA	NA	NA
GSM1854882	Alive	557	70	Female	1	NA	NA	NA
GSM1854883	Dead	1074	62	Female	3	NA	NA	NA
GSM1854884	Dead	328	64	Male	3	NA	NA	NA
GSM1854885	Dead	528	82	Male	1	NA	NA	NA
GSM1854886	Dead	415	59	Male	3	NA	NA	NA
GSM1854887	Alive	406	78	Female	1	NA	NA	NA
GSM1854888	Alive	840	69	Male	1	NA	NA	NA
GSM1854889	Dead	383	67	Male	3	NA	NA	NA
GSM1854890	Alive	1112	68	Male	2	NA	NA	NA
GSM1854891	Dead	442	71	Male	3	NA	NA	NA
GSM1854892	Dead	244	85	Male	2	NA	NA	NA
GSM1854893	Dead	3	47	Female	2	NA	NA	NA
GSM1854895	Dead	313	74	Female	3	NA	NA	NA
GSM1854896	Dead	1045	75	Male	3	NA	NA	NA
GSM1854897	Dead	347	68	Male	1	NA	NA	NA
GSM1854898	Alive	16	64	Male	1	NA	NA	NA
GSM1854899	Dead	131	73	Male	4	NA	NA	NA
GSM1854900	Alive	907	69	Female	NA	NA	NA	NA
GSM1854902	Alive	27	75	Male	1	NA	NA	NA
GSM1854903	Dead	558	74	Female	3	NA	NA	NA
GSM1854904	Alive	1061	62	Female	1	NA	NA	NA
GSM1854906	Alive	1146	61	Female	1	NA	NA	NA
GSM1854907	Alive	1070	70	Male	1	NA	NA	NA
GSM1854908	Alive	1141	73	Female	1	NA	NA	NA
GSM1854909	Alive	889	81	Female	1	NA	NA	NA
GSM1854910	Alive	1147	77	Female	1	NA	NA	NA
GSM1854911	Dead	999	69	Male	1	NA	NA	NA
GSM1854913	Alive	676	73	Female	1	NA	NA	NA
GSM1854915	Alive	140	77	Female	1	NA	NA	NA
GSM1854916	Alive	1153	78	Male	1	NA	NA	NA
GSM1854917	Alive	1239	75	Female	1	NA	NA	NA
GSM1854918	Alive	1156	72	Female	2	NA	NA	NA
GSM1854919	Alive	982	72	Female	1	NA	NA	NA
GSM1854920	Alive	950	85	Female	1	NA	NA	NA
GSM1854921	Dead	50	76	Male	2	NA	NA	NA
GSM1854922	Alive	1150	58	Female	1	NA	NA	NA
GSM1854923	Alive	1326	79	Female	1	NA	NA	NA
GSM1854924	Alive	124	67	Male	1	NA	NA	NA
GSM1854925	Alive	268	63	Female	4	NA	NA	NA
GSM1854926	Alive	262	67	Female	3	NA	NA	NA
GSM1854927	Dead	76	83	Male	1	NA	NA	NA
GSM1854928	Alive	1239	63	Male	1	NA	NA	NA
GSM1854929	Alive	683	62	Male	1	NA	NA	NA
GSM1854930	Alive	926	76	Male	1	NA	NA	NA
GSM1854931	Alive	956	76	Female	1	NA	NA	NA
GSM1854932	Alive	802	59	Female	2	NA	NA	NA
GSM1854933	Alive	818	74	Male	1	NA	NA	NA
GSM1854934	Alive	849	72	Male	1	NA	NA	NA
GSM1854935	Dead	512	79	Male	2	NA	NA	NA
GSM1854936	Alive	962	66	Female	1	NA	NA	NA
GSM1854937	Alive	972	63	Male	2	NA	NA	NA
GSM1854938	Alive	79	60	Female	2	NA	NA	NA
GSM1854940	Alive	947	57	Female	1	NA	NA	NA
GSM1854941	Alive	689	87	Female	4	NA	NA	NA
GSM1854942	Alive	527	68	Male	3	NA	NA	NA
GSM1854944	Alive	1166	77	Female	1	NA	NA	NA
GSM1854945	Alive	1984	68	Female	3	NA	NA	NA
GSM1854947	Dead	281	70	Male	2	NA	NA	NA
GSM1854948	Dead	310	74	Female	1	NA	NA	NA
GSM1854950	Alive	874	72	Male	1	NA	NA	NA
GSM1854951	Dead	80	70	Female	1	NA	NA	NA
GSM1854952	Alive	1106	72	Female	2	NA	NA	NA
GSM1854953	Alive	1779	55	Male	1	NA	NA	NA
GSM1854954	Alive	996	84	Male	4	NA	NA	NA
GSM1854955	Alive	758	72	Female	3	NA	NA	NA
GSM1854956	Dead	460	77	Male	1	NA	NA	NA
GSM1854957	Dead	283	77	Female	2	NA	NA	NA
GSM1854958	Alive	921	79	Female	1	NA	NA	NA
GSM1854960	Alive	949	60	Male	2	NA	NA	NA
GSM1854961	Dead	113	70	Female	4	NA	NA	NA
GSM1854962	Alive	808	74	Male	3	NA	NA	NA
GSM1854963	Dead	35	72	Female	2	NA	NA	NA
GSM1854964	Alive	642	78	Male	1	NA	NA	NA
GSM1854965	Dead	680	71	Female	1	NA	NA	NA
GSM1854966	Dead	23	84	Male	4	NA	NA	NA
GSM1854967	Alive	924	78	Male	1	NA	NA	NA
GSM1854969	Alive	356	71	Female	1	NA	NA	NA
GSM1854970	Alive	392	64	Male	1	NA	NA	NA
GSM1854971	Alive	489	83	Male	1	NA	NA	NA
GSM1854972	Alive	919	64	Female	3	NA	NA	NA
GSM1854973	Alive	913	57	Male	1	NA	NA	NA
GSM1854974	Alive	840	83	Male	2	NA	NA	NA
GSM1854975	Alive	911	78	Male	1	NA	NA	NA
GSM1854977	Alive	692	66	Male	1	NA	NA	NA
GSM1854979	Alive	751	67	Male	1	NA	NA	NA
GSM1854980	Alive	749	88	Female	1	NA	NA	NA
GSM1854981	Dead	591	79	Female	2	NA	NA	NA
GSM1854983	Dead	116	81	Male	1	NA	NA	NA
GSM1854984	Alive	20	82	Male	1	NA	NA	NA
GSM1854985	Alive	687	79	Female	3	NA	NA	NA
GSM1854986	Alive	577	77	Male	1	NA	NA	NA
GSM1854987	Alive	937	47	Female	1	NA	NA	NA
GSM1854988	Alive	785	64	Female	1	NA	NA	NA
GSM1854989	Alive	962	67	Male	1	NA	NA	NA
GSM1854990	Alive	830	76	Female	1	NA	NA	NA
GSM1854992	Alive	554	70	Female	1	NA	NA	NA
GSM1854994	Alive	905	75	Female	1	NA	NA	NA
GSM1854995	Dead	496	49	Female	1	NA	NA	NA
GSM1854996	Dead	651	69	Female	1	NA	NA	NA
GSM1854997	Dead	600	79	Male	3	NA	NA	NA
GSM1854998	Dead	852	61	Female	3	NA	NA	NA
GSM1854999	Alive	897	77	Female	1	NA	NA	NA
GSM1855000	Alive	807	50	Female	1	NA	NA	NA
GSM1855001	Dead	487	62	Female	2	NA	NA	NA
GSM1855003	Alive	848	75	Female	1	NA	NA	NA
GSM1855004	Alive	1029	71	Male	1	NA	NA	NA
GSM1855005	Alive	977	59	Female	3	NA	NA	NA
GSM1855006	Alive	988	79	Male	2	NA	NA	NA
GSM1855007	Alive	1130	78	Male	1	NA	NA	NA
GSM1855008	Alive	823	66	Female	1	NA	NA	NA
GSM1855009	Alive	756	61	Female	3	NA	NA	NA
GSM1855010	Alive	681	64	Male	1	NA	NA	NA
GSM1855011	Alive	1012	52	Female	1	NA	NA	NA
GSM1855012	Alive	1079	74	Female	1	NA	NA	NA
GSM1855014	Dead	1119	68	Male	1	NA	NA	NA
GSM1855015	Alive	868	75	Female	1	NA	NA	NA
GSM1855016	Alive	994	60	Male	1	NA	NA	NA
GSM1855018	Alive	878	68	Female	1	NA	NA	NA
GSM1855019	Dead	358	73	Male	1	NA	NA	NA
GSM1855020	Alive	1189	77	Female	1	NA	NA	NA
GSM1855021	Alive	890	70	Female	1	NA	NA	NA
GSM1855022	Alive	831	70	Male	1	NA	NA	NA
GSM1855023	Alive	1174	59	Female	2	NA	NA	NA
GSM1855024	Alive	1006	82	Male	2	NA	NA	NA
GSM1855026	Alive	1038	47	Female	1	NA	NA	NA
GSM1855027	Dead	837	61	Female	1	NA	NA	NA
GSM1855028	Alive	911	75	Female	1	NA	NA	NA
GSM1855029	Dead	780	70	Male	1	NA	NA	NA
GSM1855031	Alive	1033	71	Male	1	NA	NA	NA
GSM1855032	Alive	818	73	Female	1	NA	NA	NA
GSM1855033	Alive	1011	65	Female	1	NA	NA	NA
GSM1855034	Alive	809	53	Female	1	NA	NA	NA
GSM1855035	Alive	1074	69	Female	1	NA	NA	NA
GSM1855036	Dead	932	63	Male	1	NA	NA	NA
GSM1855037	Alive	1057	38	Female	1	NA	NA	NA
GSM1855038	Alive	871	62	Female	1	NA	NA	NA
GSM1855039	Dead	267	69	Male	2	NA	NA	NA
GSM1855040	Alive	807	70	Male	1	NA	NA	NA
GSM1855041	Alive	373	68	Male	1	NA	NA	NA
GSM1855042	Alive	937	53	Female	1	NA	NA	NA
GSM1855043	Alive	1029	70	Male	1	NA	NA	NA
GSM1855044	Alive	987	65	Female	1	NA	NA	NA
GSM1855045	Alive	860	67	Male	1	NA	NA	NA
GSM1855046	Alive	939	78	Male	1	NA	NA	NA
GSM1855047	Alive	1019	73	Female	2	NA	NA	NA
GSM1855048	Dead	652	77	Male	1	NA	NA	NA
GSM1855049	Dead	219	57	Female	1	NA	NA	NA
GSM1855050	Alive	698	63	Female	1	NA	NA	NA
GSM1855051	Alive	622	55	Female	1	NA	NA	NA
GSM1855052	Dead	951	79	Male	1	NA	NA	NA
GSM1855053	Alive	1015	72	Female	1	NA	NA	NA
GSM1855054	Alive	900	67	Female	1	NA	NA	NA
GSM1855055	Alive	1076	70	Female	1	NA	NA	NA
GSM1855056	Alive	1061	67	Female	1	NA	NA	NA
GSM1855057	Alive	76	70	Female	2	NA	NA	NA
GSM1855059	Alive	588	71	Male	1	NA	NA	NA
GSM1855060	Alive	1033	64	Female	1	NA	NA	NA
GSM1855061	Dead	759	60	Female	4	NA	NA	NA
GSM1855062	Dead	600	72	Female	2	NA	NA	NA
GSM1855063	Dead	349	66	Male	3	NA	NA	NA
GSM1855064	Alive	980	69	Male	1	NA	NA	NA
GSM1855065	Alive	724	81	Male	2	NA	NA	NA
GSM1855066	Alive	997	80	Female	2	NA	NA	NA
GSM1855067	Alive	987	75	Male	1	NA	NA	NA
GSM1855068	Dead	1031	70	Male	1	NA	NA	NA
GSM1855069	Alive	305	58	Male	2	NA	NA	NA
GSM1855070	Alive	994	71	Female	3	NA	NA	NA
GSM1855071	Alive	597	80	Female	1	NA	NA	NA
GSM1855072	Alive	679	86	Female	1	NA	NA	NA
GSM1855073	Alive	1042	60	Female	1	NA	NA	NA
GSM1855074	Alive	733	65	Male	1	NA	NA	NA
GSM1855075	Alive	897	77	Male	2	NA	NA	NA
GSM1855076	Alive	917	60	Female	3	NA	NA	NA
GSM1855077	Alive	855	75	Male	1	NA	NA	NA
GSM1855078	Alive	882	62	Female	1	NA	NA	NA
GSM1855079	Dead	336	66	Male	1	NA	NA	NA
GSM1855080	Alive	671	80	Female	2	NA	NA	NA
GSM1855081	Alive	777	78	Female	1	NA	NA	NA
GSM1855082	Alive	595	60	Female	1	NA	NA	NA
GSM1855083	Alive	832	56	Male	3	NA	NA	NA
GSM1855084	Alive	919	75	Male	1	NA	NA	NA
GSM1855085	Alive	971	60	Female	1	NA	NA	NA
GSM1855086	Alive	882	82	Male	1	NA	NA	NA
GSM1855087	Alive	938	77	Male	1	NA	NA	NA
GSM1855088	Alive	468	70	Female	1	NA	NA	NA
GSM1855089	Alive	834	78	Female	1	NA	NA	NA
GSM1855091	Dead	936	79	Male	1	NA	NA	NA
GSM1855092	Alive	732	78	Female	1	NA	NA	NA
GSM1855093	Alive	766	72	Male	1	NA	NA	NA
GSM1855094	Alive	607	66	Female	1	NA	NA	NA
GSM1855095	Alive	578	81	Male	1	NA	NA	NA
GSM1855096	Alive	816	74	Female	3	NA	NA	NA
GSM1855097	Alive	853	66	Female	3	NA	NA	NA
GSM1855098	Alive	759	83	Female	1	NA	NA	NA
GSM1855099	Dead	917	81	Male	1	NA	NA	NA
GSM1855100	Alive	868	67	Female	1	NA	NA	NA
GSM1855101	Dead	920	55	Female	3	NA	NA	NA
GSM1855102	Alive	607	73	Female	3	NA	NA	NA
GSM1855103	Alive	568	69	Male	1	NA	NA	NA
GSM1855104	Dead	98	70	Female	NA	NA	NA	NA
GSM1855105	Alive	555	68	Female	1	NA	NA	NA
GSM1855106	Dead	306	84	Male	1	NA	NA	NA
GSM1855107	Alive	906	76	Female	1	NA	NA	NA
GSM1855108	Alive	918	61	Female	3	NA	NA	NA
GSM1855109	Dead	693	62	Male	1	NA	NA	NA
GSM1855110	Alive	680	61	Male	2	NA	NA	NA
GSM1855111	Alive	539	65	Male	NA	NA	NA	NA
GSM1855112	Alive	820	69	Female	1	NA	NA	NA
GSM1855113	Alive	750	77	Male	1	NA	NA	NA
GSM1855114	Alive	708	58	Male	1	NA	NA	NA
GSM1855116	Alive	672	76	Male	1	NA	NA	NA
GSM1855117	Alive	470	74	Female	3	NA	NA	NA
GSM1855118	Alive	54	45	Male	3	NA	NA	NA
GSM1855119	Alive	780	50	Female	3	NA	NA	NA
GSM1855120	Dead	216	70	Female	1	NA	NA	NA
GSM1855121	Dead	294	67	Male	3	NA	NA	NA
GSM1855122	Alive	757	41	Male	2	NA	NA	NA
GSM1855123	Alive	760	84	Female	1	NA	NA	NA
GSM1855124	Alive	1089	51	Male	1	NA	NA	NA
GSM1855125	Dead	17	74	Male	1	NA	NA	NA
GSM1855126	Alive	577	66	Female	2	NA	NA	NA
GSM1855127	Alive	539	52	Female	3	NA	NA	NA
GSM1855128	Alive	906	51	Female	1	NA	NA	NA
GSM1855129	Alive	628	53	Female	1	NA	NA	NA
GSM1855131	Dead	696	65	Male	1	NA	NA	NA
GSM1855132	Alive	858	79	Female	1	NA	NA	NA
GSM1855133	Alive	701	59	Female	1	NA	NA	NA
GSM1855134	Dead	382	69	Female	1	NA	NA	NA
GSM1855135	Alive	539	83	Female	3	NA	NA	NA
GSM1855136	Dead	4	50	Male	1	NA	NA	NA
GSM1855137	Alive	557	72	Male	3	NA	NA	NA
GSM1855138	Alive	619	67	Female	1	NA	NA	NA
GSM1855140	Alive	830	82	Male	1	NA	NA	NA
GSM1855141	Alive	821	72	Female	1	NA	NA	NA
GSM1855142	Alive	831	72	Male	1	NA	NA	NA
GSM1855143	Alive	591	70	Female	1	NA	NA	NA
GSM1855144	Alive	850	51	Male	1	NA	NA	NA
GSM1855145	Dead	809	74	Female	1	NA	NA	NA
GSM1855146	Alive	142	74	Female	1	NA	NA	NA
GSM1855147	Alive	807	69	Female	1	NA	NA	NA
GSM1855149	Alive	832	69	Female	1	NA	NA	NA
GSM1855150	Dead	98	73	Female	2	NA	NA	NA
GSM1855151	Alive	798	76	Female	1	NA	NA	NA
GSM1855152	Alive	799	77	Male	1	NA	NA	NA
GSM1855153	Dead	325	66	Male	1	NA	NA	NA
GSM1855156	Alive	978	66	Female	2	NA	NA	NA
GSM1855157	Alive	806	85	Male	2	NA	NA	NA
GSM1855158	Alive	698	81	Male	2	NA	NA	NA
GSM1855159	Alive	861	64	Female	1	NA	NA	NA
GSM1855160	Alive	325	56	Male	2	NA	NA	NA
GSM1855161	Dead	332	66	Male	1	NA	NA	NA
GSM1855162	Alive	734	77	Female	1	NA	NA	NA
GSM1855163	Alive	867	58	Female	1	NA	NA	NA
GSM1855164	Alive	830	54	Female	2	NA	NA	NA
GSM1855165	Dead	541	68	Female	1	NA	NA	NA
GSM1855166	Alive	679	68	Male	2	NA	NA	NA
GSM1855168	Dead	40	77	Female	1	NA	NA	NA
GSM1855169	Alive	740	68	Female	1	NA	NA	NA
GSM1855170	Alive	540	67	Male	1	NA	NA	NA
GSM1855171	Alive	1155	76	Male	1	NA	NA	NA
GSM1855172	Alive	797	81	Male	1	NA	NA	NA
GSM1855173	Dead	676	77	Male	2	NA	NA	NA
GSM1855174	Alive	540	80	Female	3	NA	NA	NA
GSM1855175	Dead	380	76	Female	3	NA	NA	NA
GSM1855176	Alive	1350	75	Female	NA	NA	NA	NA
GSM1855177	Alive	570	78	Female	1	NA	NA	NA
GSM1855178	Dead	58	76	Female	2	NA	NA	NA
GSM1855179	Alive	5	66	Male	1	NA	NA	NA
GSM1855180	Alive	554	52	Female	3	NA	NA	NA
GSM1855181	Alive	534	62	Male	2	NA	NA	NA
GSM1855182	Alive	4	71	Female	2	NA	NA	NA
GSM1855183	Alive	1692	53	Female	2	NA	NA	NA
GSM1855184	Dead	223	73	Female	2	NA	NA	NA
GSM1855185	Alive	1085	67	Male	1	NA	NA	NA
GSM1855187	Dead	912	76	Male	4	NA	NA	NA
GSM1855188	Dead	1357	82	Male	1	NA	NA	NA
GSM1855189	Dead	844	76	Male	4	NA	NA	NA
GSM1855190	Dead	520	49	Female	1	NA	NA	NA
GSM1855192	Dead	239	70	Female	2	NA	NA	NA
GSM1855193	Alive	349	75	Female	1	NA	NA	NA
GSM1855195	Dead	1025	63	Male	2	NA	NA	NA
GSM1855196	Dead	1560	66	Female	2	NA	NA	NA
GSM1855198	Dead	564	71	Male	NA	NA	NA	NA
GSM1855199	Dead	293	61	Female	1	NA	NA	NA
GSM1855200	Dead	1053	60	Male	1	NA	NA	NA
GSM1855202	Dead	627	56	Female	1	NA	NA	NA
GSM1855203	Alive	395	65	Male	3	NA	NA	NA
GSM1855204	Dead	1007	62	Female	3	NA	NA	NA
GSM1855206	Dead	681	77	Male	3	NA	NA	NA
GSM1855207	Alive	1293	81	Female	2	NA	NA	NA
GSM1855208	Dead	1293	65	Male	1	NA	NA	NA
GSM1855209	Dead	968	61	Female	1	NA	NA	NA
GSM1855210	Alive	1843	50	Female	1	NA	NA	NA
GSM1855211	Alive	1616	63	Female	1	NA	NA	NA
GSM1855212	Alive	1559	75	Female	4	NA	NA	NA
GSM1855213	Alive	1703	89	Female	1	NA	NA	NA
GSM1855214	Alive	1834	82	Female	1	NA	NA	NA
GSM1855215	Alive	1551	79	Male	1	NA	NA	NA
GSM1855217	Alive	1554	85	Female	1	NA	NA	NA
GSM1855218	Dead	489	67	Female	4	NA	NA	NA
GSM1855219	Dead	216	46	Female	3	NA	NA	NA
GSM1855220	Alive	1510	57	Female	1	NA	NA	NA
GSM1855221	Alive	701	72	Female	1	NA	NA	NA
GSM1855222	Alive	1363	68	Female	1	NA	NA	NA
GSM1855223	Dead	1135	85	Female	1	NA	NA	NA
GSM1855224	Dead	618	54	Female	2	NA	NA	NA
GSM1855225	Dead	1037	72	Male	1	NA	NA	NA
GSM1855226	Alive	1599	56	Male	1	NA	NA	NA
GSM1855228	Dead	171	69	Male	3	NA	NA	NA
GSM1855229	Alive	2077	78	Male	1	NA	NA	NA
GSM1855230	Alive	1652	76	Female	2	NA	NA	NA
GSM1855231	Dead	489	59	Male	2	NA	NA	NA
GSM1855232	Dead	762	79	Male	1	NA	NA	NA
GSM1855234	Alive	1693	83	Male	1	NA	NA	NA
GSM1855235	Dead	713	75	Female	1	NA	NA	NA
GSM1855236	Alive	1652	75	Male	1	NA	NA	NA
GSM1855237	Dead	181	81	Female	3	NA	NA	NA
GSM1855238	Dead	1629	73	Female	1	NA	NA	NA
GSM773540	Dead	437	55	Female	2	NA	NA	NA
GSM773541	Alive	743	38	Female	2	NA	NA	NA
GSM773542	Alive	2601	30	Male	2	NA	NA	NA
GSM773543	Alive	1173	64	Female	2	NA	NA	NA
GSM773544	Alive	2369	63	Female	2	NA	NA	NA
GSM773545	Alive	1879	60	Female	2	NA	NA	NA
GSM773546	Alive	606	68	Female	2	NA	NA	NA
GSM773547	Dead	300	58	Male	2	NA	NA	NA
GSM773548	Alive	1919	63	Female	1	NA	NA	NA
GSM773549	Alive	1835	56	Female	1	NA	NA	NA
GSM773550	Alive	1828	34	Female	1	NA	NA	NA
GSM773551	Dead	1841	75	Female	2	NA	NA	NA
GSM773552	Dead	639	60	Male	2	NA	NA	NA
GSM773553	Dead	1311	46	Female	1	NA	NA	NA
GSM773554	Alive	1098	60	Female	1	NA	NA	NA
GSM773555	Alive	1189	61	Male	1	NA	NA	NA
GSM773556	Alive	3863	63	Male	1	NA	NA	NA
GSM773557	Alive	1475	47	Male	2	NA	NA	NA
GSM773558	Alive	1856	59	Male	2	NA	NA	NA
GSM773559	Alive	3067	64	Male	2	NA	NA	NA
GSM773560	Alive	1142	60	Male	2	NA	NA	NA
GSM773561	Alive	1825	61	Male	1	NA	NA	NA
GSM773562	Alive	1610	53	Female	1	NA	NA	NA
GSM773563	Alive	2014	53	Male	1	NA	NA	NA
GSM773564	Alive	1826	53	Male	1	NA	NA	NA
GSM773565	Alive	2191	67	Male	1	NA	NA	NA
GSM773566	Alive	3342	69	Female	1	NA	NA	NA
GSM773567	Alive	1328	64	Male	1	NA	NA	NA
GSM773568	Alive	2925	69	Female	1	NA	NA	NA
GSM773569	Alive	2880	50	Female	1	NA	NA	NA
GSM773570	Alive	1724	70	Female	1	NA	NA	NA
GSM773571	Alive	2765	57	Male	2	NA	NA	NA
GSM773572	Alive	1529	58	Male	2	NA	NA	NA
GSM773573	Dead	221	69	Male	2	NA	NA	NA
GSM773574	Dead	546	61	Male	2	NA	NA	NA
GSM773575	Dead	346	68	Male	2	NA	NA	NA
GSM773576	Dead	853	64	Female	2	NA	NA	NA
GSM773577	Dead	2661	69	Female	2	NA	NA	NA
GSM773578	Alive	817	66	Female	2	NA	NA	NA
GSM773579	Dead	425	68	Male	2	NA	NA	NA
GSM773580	Alive	1281	69	Male	2	NA	NA	NA
GSM773581	Alive	1044	64	Male	1	NA	NA	NA
GSM773582	Alive	565	64	Male	1	NA	NA	NA
GSM773583	Dead	1059	66	Male	1	NA	NA	NA
GSM773584	Dead	1625	64	Male	1	NA	NA	NA
GSM773585	Dead	1695	68	Female	1	NA	NA	NA
GSM773586	Alive	2976	68	Male	1	NA	NA	NA
GSM773587	Dead	1143	63	Male	1	NA	NA	NA
GSM773588	Alive	1682	58	Female	1	NA	NA	NA
GSM773589	Dead	1242	71	Male	1	NA	NA	NA
GSM773590	Alive	2252	52	Female	1	NA	NA	NA
GSM773591	Dead	943	66	Male	1	NA	NA	NA
GSM773592	Dead	1346	66	Female	1	NA	NA	NA
GSM773593	Dead	1482	47	Female	1	NA	NA	NA
GSM773594	Alive	2386	64	Male	1	NA	NA	NA
GSM773595	Alive	1560	54	Male	1	NA	NA	NA
GSM773596	Dead	1001	67	Female	1	NA	NA	NA
GSM773597	Dead	259	54	Female	2	NA	NA	NA
GSM773598	Alive	2289	65	Male	2	NA	NA	NA
GSM773599	Alive	1916	49	Female	2	NA	NA	NA
GSM773600	Alive	2048	62	Male	2	NA	NA	NA
GSM773601	Alive	1475	61	Male	2	NA	NA	NA
GSM773602	Alive	1539	57	Male	2	NA	NA	NA
GSM773603	Alive	636	60	Male	2	NA	NA	NA
GSM773604	Alive	1275	46	Male	2	NA	NA	NA
GSM773605	Alive	2005	52	Male	2	NA	NA	NA
GSM773606	Alive	1965	54	Female	2	NA	NA	NA
GSM773607	Alive	2425	58	Female	1	NA	NA	NA
GSM773608	Alive	1566	64	Female	1	NA	NA	NA
GSM773609	Alive	990	65	Female	1	NA	NA	NA
GSM773610	Alive	729	52	Male	1	NA	NA	NA
GSM773611	Alive	2354	61	Male	1	NA	NA	NA
GSM773612	Alive	818	61	Male	1	NA	NA	NA
GSM773613	Alive	2009	62	Female	1	NA	NA	NA
GSM773614	Alive	2549	47	Female	1	NA	NA	NA
GSM773615	Alive	3411	64	Male	1	NA	NA	NA
GSM773616	Alive	1806	50	Male	1	NA	NA	NA
GSM773617	Alive	1937	66	Female	1	NA	NA	NA
GSM773618	Alive	1520	56	Male	1	NA	NA	NA
GSM773619	Alive	1375	76	Male	1	NA	NA	NA
GSM773620	Alive	1756	56	Female	1	NA	NA	NA
GSM773621	Alive	1597	53	Male	1	NA	NA	NA
GSM773622	Alive	1714	57	Male	1	NA	NA	NA
GSM773623	Alive	1637	61	Female	1	NA	NA	NA
GSM773624	Alive	1653	66	Female	1	NA	NA	NA
GSM773625	Alive	1196	66	Male	1	NA	NA	NA
GSM773626	Alive	1702	57	Male	1	NA	NA	NA
GSM773627	Alive	2050	61	Female	1	NA	NA	NA
GSM773628	Alive	1256	63	Male	1	NA	NA	NA
GSM773629	Alive	818	60	Male	1	NA	NA	NA
GSM773630	Alive	1154	59	Male	1	NA	NA	NA
GSM773631	Alive	3058	55	Female	1	NA	NA	NA
GSM773632	Alive	1941	52	Male	1	NA	NA	NA
GSM773633	Alive	1596	68	Female	1	NA	NA	NA
GSM773634	Alive	2450	55	Male	1	NA	NA	NA
GSM773635	Alive	1881	64	Female	1	NA	NA	NA
GSM773636	Alive	1637	51	Male	1	NA	NA	NA
GSM773637	Alive	2034	55	Female	1	NA	NA	NA
GSM773638	Alive	2134	65	Female	1	NA	NA	NA
GSM773639	Dead	779	60	Female	2	NA	NA	NA
GSM773640	Dead	540	58	Male	2	NA	NA	NA
GSM773641	Alive	1317	68	Male	2	NA	NA	NA
GSM773642	Alive	1980	65	Female	2	NA	NA	NA
GSM773643	Dead	702	66	Male	2	NA	NA	NA
GSM773644	Dead	564	66	Male	2	NA	NA	NA
GSM773645	Dead	788	62	Male	2	NA	NA	NA
GSM773646	Alive	1463	58	Female	2	NA	NA	NA
GSM773647	Dead	1345	49	Male	2	NA	NA	NA
GSM773648	Alive	832	61	Male	2	NA	NA	NA
GSM773649	Alive	2687	59	Female	2	NA	NA	NA
GSM773650	Dead	1122	53	Female	2	NA	NA	NA
GSM773651	Alive	2668	64	Male	2	NA	NA	NA
GSM773652	Alive	1936	67	Female	1	NA	NA	NA
GSM773653	Alive	871	69	Male	1	NA	NA	NA
GSM773654	Alive	2671	61	Female	1	NA	NA	NA
GSM773655	Alive	1482	64	Female	1	NA	NA	NA
GSM773656	Alive	1128	53	Female	1	NA	NA	NA
GSM773657	Dead	1042	71	Female	1	NA	NA	NA
GSM773658	Dead	1229	52	Male	1	NA	NA	NA
GSM773659	Dead	2263	52	Female	1	NA	NA	NA
GSM773660	Alive	1770	54	Female	1	NA	NA	NA
GSM773661	Dead	1433	49	Male	1	NA	NA	NA
GSM773662	Alive	1823	68	Female	1	NA	NA	NA
GSM773663	Alive	1988	62	Female	1	NA	NA	NA
GSM773664	Alive	1434	63	Female	1	NA	NA	NA
GSM773665	Dead	630	63	Male	1	NA	NA	NA
GSM773666	Alive	1537	62	Female	1	NA	NA	NA
GSM773667	Dead	1429	57	Female	1	NA	NA	NA
GSM773668	Dead	1038	39	Female	1	NA	NA	NA
GSM773669	Alive	2486	55	Female	2	NA	NA	NA
GSM773670	Alive	740	47	Male	2	NA	NA	NA
GSM773671	Alive	1042	64	Female	2	NA	NA	NA
GSM773672	Alive	1267	60	Female	2	NA	NA	NA
GSM773673	Alive	1017	48	Female	2	NA	NA	NA
GSM773674	Alive	1041	60	Male	2	NA	NA	NA
GSM773675	Alive	1859	52	Male	2	NA	NA	NA
GSM773676	Alive	1717	48	Female	2	NA	NA	NA
GSM773677	Alive	1494	60	Female	2	NA	NA	NA
GSM773678	Alive	754	49	Male	2	NA	NA	NA
GSM773679	Alive	2364	63	Male	2	NA	NA	NA
GSM773680	Alive	1733	68	Male	1	NA	NA	NA
GSM773681	Alive	1941	58	Female	1	NA	NA	NA
GSM773682	Alive	774	68	Male	1	NA	NA	NA
GSM773683	Alive	2913	64	Female	1	NA	NA	NA
GSM773684	Alive	1803	58	Male	1	NA	NA	NA
GSM773685	Alive	1912	62	Male	1	NA	NA	NA
GSM773686	Alive	1481	66	Female	1	NA	NA	NA
GSM773687	Alive	1231	68	Female	1	NA	NA	NA
GSM773688	Alive	1964	68	Male	1	NA	NA	NA
GSM773689	Alive	3352	72	Male	1	NA	NA	NA
GSM773690	Alive	2158	62	Male	1	NA	NA	NA
GSM773691	Alive	3466	67	Female	1	NA	NA	NA
GSM773692	Alive	3263	52	Male	1	NA	NA	NA
GSM773693	Alive	1823	67	Female	1	NA	NA	NA
GSM773694	Alive	1856	59	Female	1	NA	NA	NA
GSM773695	Alive	2449	70	Female	1	NA	NA	NA
GSM773696	Alive	1859	59	Male	1	NA	NA	NA
GSM773697	Alive	1998	56	Male	1	NA	NA	NA
GSM773698	Alive	1852	69	Female	1	NA	NA	NA
GSM773699	Alive	1894	61	Female	1	NA	NA	NA
GSM773700	Alive	1861	54	Female	1	NA	NA	NA
GSM773701	Alive	1669	64	Female	1	NA	NA	NA
GSM773702	Alive	3189	45	Female	1	NA	NA	NA
GSM773703	Alive	1822	55	Female	1	NA	NA	NA
GSM773704	Alive	1809	61	Female	1	NA	NA	NA
GSM773705	Alive	2552	65	Female	1	NA	NA	NA
GSM773706	Alive	2968	65	Male	1	NA	NA	NA
GSM773707	Alive	3066	47	Male	1	NA	NA	NA
GSM773708	Alive	1412	60	Female	1	NA	NA	NA
GSM773709	Alive	1317	55	Male	1	NA	NA	NA
GSM773710	Alive	1180	61	Female	1	NA	NA	NA
GSM773711	Alive	1688	67	Male	1	NA	NA	NA
GSM773712	Alive	1417	69	Male	1	NA	NA	NA
GSM773713	Alive	1426	65	Female	1	NA	NA	NA
GSM773714	Alive	1674	65	Male	1	NA	NA	NA
GSM773715	Alive	1848	56	Female	1	NA	NA	NA
GSM773716	Alive	1856	65	Female	1	NA	NA	NA
GSM773717	Alive	1780	56	Female	1	NA	NA	NA
GSM773718	Alive	2084	59	Male	1	NA	NA	NA
GSM773719	Alive	1879	56	Male	1	NA	NA	NA
GSM773720	Alive	1114	63	Female	1	NA	NA	NA
GSM773721	Alive	2806	49	Male	1	NA	NA	NA
GSM773722	Alive	1663	58	Female	1	NA	NA	NA
GSM773723	Alive	1726	62	Male	1	NA	NA	NA
GSM773724	Alive	1629	68	Female	1	NA	NA	NA
GSM773725	Alive	2179	66	Female	1	NA	NA	NA
GSM773726	Alive	1917	57	Female	1	NA	NA	NA
GSM773727	Alive	1446	57	Female	1	NA	NA	NA
GSM773728	Alive	1162	52	Female	1	NA	NA	NA
GSM773729	Alive	1231	65	Female	1	NA	NA	NA
GSM773730	Alive	941	65	Male	1	NA	NA	NA
GSM773731	Alive	1623	50	Female	1	NA	NA	NA
GSM773732	Alive	1855	53	Female	1	NA	NA	NA
GSM773733	Alive	1404	53	Female	1	NA	NA	NA
GSM773734	Alive	2221	66	Female	1	NA	NA	NA
GSM773735	Alive	849	62	Female	1	NA	NA	NA
GSM773736	Alive	831	66	Female	1	NA	NA	NA
GSM773737	Alive	3219	35	Male	1	NA	NA	NA
GSM773738	Alive	2585	59	Female	1	NA	NA	NA
GSM773739	Alive	2442	67	Female	1	NA	NA	NA
GSM773740	Alive	1910	56	Female	1	NA	NA	NA
GSM773741	Alive	1834	62	Female	1	NA	NA	NA
GSM773742	Alive	2918	46	Female	1	NA	NA	NA
GSM773743	Alive	2285	67	Female	1	NA	NA	NA
GSM773744	Alive	2149	62	Male	1	NA	NA	NA
GSM773745	Alive	2561	63	Male	1	NA	NA	NA
GSM773746	Alive	1947	52	Female	1	NA	NA	NA
GSM773747	Alive	1841	60	Female	1	NA	NA	NA
GSM773748	Alive	1971	47	Female	1	NA	NA	NA
GSM773749	Alive	2409	56	Male	1	NA	NA	NA
GSM773750	Alive	1624	56	Female	1	NA	NA	NA
GSM773751	Alive	2430	63	Female	1	NA	NA	NA
GSM773752	Alive	1856	59	Male	1	NA	NA	NA
GSM773753	Alive	1516	62	Female	1	NA	NA	NA
GSM773754	Alive	1819	50	Male	1	NA	NA	NA
GSM773755	Alive	2413	55	Male	1	NA	NA	NA
GSM773756	Alive	1849	54	Female	1	NA	NA	NA
GSM773757	Alive	2181	65	Male	1	NA	NA	NA
GSM773758	Alive	2168	66	Male	1	NA	NA	NA
GSM773759	Alive	2154	62	Female	1	NA	NA	NA
GSM773760	Alive	2073	64	Female	1	NA	NA	NA
GSM773761	Alive	1994	64	Female	1	NA	NA	NA
GSM773762	Alive	2137	61	Male	1	NA	NA	NA
GSM773763	Alive	1998	58	Female	1	NA	NA	NA
GSM773764	Alive	1908	49	Male	1	NA	NA	NA
GSM773765	Alive	1660	58	Male	1	NA	NA	NA
TCGA-55-7816	Dead	468	49	Female	4	NA	NA	NA
TCGA-93-A4JP	Alive	578	64	Male	4	NA	NA	M1
TCGA-99-8033	Dead	656	74	Female	4	NA	NA	M1
