# Supplementary material for: Identification of fatty acid-related subtypes, the establishment of a prognostic signature, and immune infiltration characteristics in lung adenocarcinoma
Source: Aging (Albany NY). 2023 May 16;15(10):4202–35. doi: 10.18632/aging.204725 (PMC10258028; doi:10.18632/aging.204725)
Supplement: Supplementary Table 5 [file aging-15-204725-s004.xlsx]

## Sheet: Sheet1
Supplementary Table 5. Distribution of FARGs clusters for LUAD patients.
ID	FARGsCluster
GSM1672281	B
GSM1672282	B
GSM1672283	B
GSM1672284	B
GSM1672285	A
GSM1672286	B
GSM1672287	A
GSM1672288	B
GSM1672289	B
GSM1672290	B
GSM1672291	B
GSM1672292	B
GSM1672293	B
GSM1672294	B
GSM1672295	B
GSM1672296	A
GSM1672297	A
GSM1672298	B
GSM1672299	A
GSM1672300	B
GSM1672301	B
GSM1672302	A
GSM1672303	A
GSM1672304	A
GSM1672305	A
GSM1672306	A
GSM1672307	B
GSM1672308	B
GSM1672309	B
GSM1672310	A
GSM1672311	B
GSM1672312	B
GSM1672313	A
GSM1672314	B
GSM1672315	A
GSM1672316	B
GSM1672317	A
GSM1672318	A
GSM1672319	A
GSM1672320	B
GSM1672321	A
GSM1672322	B
GSM1672323	B
GSM1672324	A
GSM1672325	B
GSM1672326	A
GSM1672327	A
GSM1672328	A
GSM1672329	B
GSM1672330	A
GSM1672331	A
GSM1672332	B
GSM1672333	B
GSM1672334	B
GSM1672335	B
GSM1672336	A
GSM1672337	B
GSM1672338	B
GSM1672339	B
GSM1672340	B
GSM1672341	A
GSM1672342	B
GSM1672343	A
GSM1672344	B
GSM1672345	A
GSM1672346	A
GSM1672347	B
GSM1672348	B
GSM1672349	A
GSM1672350	A
GSM1672351	A
GSM1672352	B
GSM1672353	B
GSM1672354	B
GSM1672355	B
GSM1672356	A
GSM1672357	A
GSM1672358	A
GSM1672359	B
GSM1672360	A
GSM1672361	B
GSM1672362	B
GSM1672363	B
GSM1672364	A
GSM1672365	A
GSM1672366	B
GSM1672367	B
GSM1672368	B
GSM1672369	B
GSM1672370	B
GSM1672371	B
GSM1672372	B
GSM1672373	B
GSM1672374	A
GSM1672375	B
GSM1672376	A
GSM1672377	B
GSM1672378	A
GSM1672379	B
GSM1672380	A
GSM1672381	B
GSM1672382	B
GSM1672383	A
GSM1672384	B
GSM1672385	B
GSM1672386	A
GSM1672387	B
GSM1672388	A
GSM1672390	A
GSM1672391	B
GSM1672392	B
GSM1672393	A
GSM1672394	B
GSM1672395	B
GSM1672396	B
GSM1672397	B
GSM1672398	B
GSM1672399	A
GSM1672400	B
GSM1672401	A
GSM1672402	A
GSM1672403	B
GSM1672404	A
GSM1672405	B
GSM1672406	B
GSM1672407	B
GSM1672408	A
GSM1672409	B
GSM1672410	B
GSM1672411	A
GSM1672412	B
GSM1672413	B
GSM1672414	B
GSM1672415	B
GSM1672416	A
GSM1672417	A
GSM1672418	B
GSM1672419	B
GSM1672420	A
GSM1672421	A
GSM1672422	A
GSM1672423	A
GSM1672424	B
GSM1672425	B
GSM1672426	A
GSM1672427	B
GSM1672428	B
GSM1672429	B
GSM1672430	B
GSM1672431	B
GSM1672432	A
GSM1672433	A
GSM1672434	A
GSM1672435	A
GSM1672436	B
GSM1672437	A
GSM1672438	B
GSM1672439	B
GSM1672440	A
GSM1672441	B
GSM1672442	A
GSM1672443	B
GSM1672444	A
GSM1672445	B
GSM1672446	B
GSM1672447	A
GSM1672448	B
GSM1672449	B
GSM1672450	A
GSM1672451	B
GSM1672452	A
GSM1672453	A
GSM1672454	B
GSM1672455	A
GSM1672456	A
GSM1672457	A
GSM1672458	B
GSM1672459	B
GSM1672460	B
GSM1672461	B
GSM1672462	B
GSM1672463	A
GSM1672464	B
GSM1672465	B
GSM1672466	B
GSM1672467	A
GSM1672468	B
GSM1672469	B
GSM1672470	B
GSM1672471	B
GSM1672472	B
GSM1672473	A
GSM1672474	B
GSM1672475	A
GSM1672476	B
GSM1672477	B
GSM1672478	B
GSM1672479	A
GSM1672480	B
GSM1672481	B
GSM1672482	B
GSM1672483	B
GSM1672484	B
GSM1672485	B
GSM1672486	A
GSM1672487	A
GSM1672488	B
GSM1672489	B
GSM1672490	A
GSM1672491	B
GSM1672492	B
GSM1672493	A
GSM1672494	A
GSM1672495	B
GSM1672496	B
GSM1672497	B
GSM1672498	B
GSM1672499	B
GSM1672500	A
GSM1672501	B
GSM1672502	B
GSM1672503	A
GSM1672504	B
GSM1672505	B
GSM1672506	A
GSM1672507	B
GSM1672508	B
GSM1672509	B
GSM1672510	A
GSM1672511	B
GSM1672512	A
GSM1672513	B
GSM1672514	B
GSM1672515	A
GSM1672516	A
GSM1672517	B
GSM1672518	A
GSM1672519	B
GSM1672520	A
GSM1672521	B
GSM1672522	B
GSM1672523	B
GSM1672524	A
GSM1672525	B
GSM1672526	A
GSM1672527	B
GSM1672528	B
GSM1672529	A
GSM1672530	B
GSM1672531	B
GSM1672532	B
GSM1672533	B
GSM1672534	A
GSM1672535	A
GSM1672536	B
GSM1672537	A
GSM1672538	B
GSM1672539	B
GSM1672540	A
GSM1672541	A
GSM1672542	B
GSM1672543	B
GSM1672544	A
GSM1672545	A
GSM1672546	A
GSM1672547	B
GSM1672548	B
GSM1672549	A
GSM1672550	A
GSM1672551	A
GSM1672552	B
GSM1672553	B
GSM1672554	A
GSM1672555	A
GSM1672556	A
GSM1672557	B
GSM1672558	A
GSM1672559	A
GSM1672560	A
GSM1672561	B
GSM1672562	A
GSM1672563	B
GSM1672564	B
GSM1672565	A
GSM1672566	B
GSM1672567	B
GSM1672568	B
GSM1672569	A
GSM1672570	A
GSM1672571	B
GSM1672572	B
GSM1672573	A
GSM1672574	B
GSM1672575	A
GSM1672576	A
GSM1672577	A
GSM1672578	A
GSM1672579	B
GSM1672580	A
GSM1672581	A
GSM1672582	B
GSM1672583	A
GSM1672584	A
GSM1672585	A
GSM1672586	A
GSM1672587	A
GSM1672588	B
GSM1672589	A
GSM1672590	A
GSM1672591	A
GSM1672592	B
GSM1672593	A
GSM1672594	A
GSM1672595	B
GSM1672596	A
GSM1672597	B
GSM1672598	A
GSM1672599	A
GSM1672600	B
GSM1672601	B
GSM1672602	B
GSM1672603	B
GSM1672604	B
GSM1672605	A
GSM1672606	A
GSM1672607	A
GSM1672608	B
GSM1672609	B
GSM1672610	B
GSM1672611	B
GSM1672612	B
GSM1672613	B
GSM1672614	A
GSM1672615	B
GSM1672616	B
GSM1672617	B
GSM1672618	B
GSM1672619	B
GSM1672620	A
GSM1672621	B
GSM1672622	B
GSM1672623	B
GSM1672624	B
GSM1672625	A
GSM1672626	B
GSM1672627	A
GSM1672628	B
GSM1672629	B
GSM1672630	A
GSM1672631	B
GSM1672632	A
GSM1672633	B
GSM1672634	A
GSM1672635	A
GSM1672636	B
GSM1672637	B
GSM1672638	A
GSM1672639	A
GSM1672640	B
GSM1672641	B
GSM1672642	B
GSM1672643	A
GSM1672644	B
GSM1672645	B
GSM1672646	A
GSM1672647	B
GSM1672648	B
GSM1672649	A
GSM1672650	B
GSM1672651	A
GSM1672652	B
GSM1672653	B
GSM1672654	B
GSM1672655	B
GSM1672656	B
GSM1672657	A
GSM1672658	A
GSM1672659	B
GSM1672660	A
GSM1672661	B
GSM1672662	B
GSM1672663	B
GSM1672664	A
GSM1672665	B
GSM1672666	A
GSM1672667	A
GSM1672668	B
GSM1672669	B
GSM1672670	B
GSM1672671	B
GSM1672672	A
GSM1672673	B
GSM1672674	B
GSM1672675	A
GSM1672676	A
GSM1672677	B
GSM1672678	A
GSM1672679	A
GSM1672680	A
GSM1672681	B
GSM1672682	A
GSM1672683	A
GSM1672684	B
GSM1672685	A
GSM1672686	B
GSM1672687	A
GSM1672688	A
GSM1672689	A
GSM1672690	A
GSM1672691	B
GSM1672692	A
GSM1672693	A
GSM1672694	A
GSM1672695	B
GSM1672696	B
GSM1672697	A
GSM1672698	A
GSM1672699	A
GSM1672700	B
GSM1672701	A
GSM1672702	A
GSM1672703	B
GSM1672704	A
GSM1672705	B
GSM1672706	A
GSM1672707	B
GSM1672708	B
GSM1672709	A
GSM1672710	B
GSM1672711	B
GSM1672712	B
GSM1672713	A
GSM1672714	A
GSM1672715	B
GSM1672716	B
GSM1672717	A
GSM1672718	A
GSM1672719	B
GSM1672720	A
GSM1672721	A
GSM1672722	B
GSM1672723	B
GSM1854798	B
GSM1854799	A
GSM1854800	A
GSM1854801	B
GSM1854802	A
GSM1854803	B
GSM1854804	B
GSM1854805	A
GSM1854806	B
GSM1854807	B
GSM1854808	B
GSM1854809	B
GSM1854810	A
GSM1854811	B
GSM1854812	B
GSM1854813	B
GSM1854814	A
GSM1854815	A
GSM1854816	B
GSM1854817	B
GSM1854818	A
GSM1854819	A
GSM1854820	B
GSM1854821	B
GSM1854822	B
GSM1854823	A
GSM1854825	A
GSM1854826	B
GSM1854827	A
GSM1854828	B
GSM1854829	A
GSM1854830	A
GSM1854831	A
GSM1854832	B
GSM1854833	B
GSM1854834	A
GSM1854835	B
GSM1854836	B
GSM1854837	B
GSM1854838	A
GSM1854839	B
GSM1854840	B
GSM1854841	A
GSM1854842	B
GSM1854843	B
GSM1854844	B
GSM1854846	B
GSM1854847	B
GSM1854848	B
GSM1854849	B
GSM1854850	B
GSM1854851	B
GSM1854852	B
GSM1854853	A
GSM1854854	B
GSM1854855	B
GSM1854856	A
GSM1854857	B
GSM1854859	B
GSM1854860	B
GSM1854861	A
GSM1854862	B
GSM1854863	B
GSM1854864	B
GSM1854865	A
GSM1854866	B
GSM1854867	B
GSM1854868	A
GSM1854869	B
GSM1854870	A
GSM1854871	B
GSM1854872	A
GSM1854873	B
GSM1854874	B
GSM1854875	A
GSM1854876	A
GSM1854877	B
GSM1854879	B
GSM1854880	A
GSM1854881	B
GSM1854882	A
GSM1854883	A
GSM1854884	B
GSM1854885	B
GSM1854886	A
GSM1854887	B
GSM1854888	B
GSM1854889	B
GSM1854890	B
GSM1854891	A
GSM1854892	A
GSM1854893	A
GSM1854895	A
GSM1854896	B
GSM1854897	A
GSM1854898	B
GSM1854899	B
GSM1854900	B
GSM1854902	B
GSM1854903	A
GSM1854904	B
GSM1854906	B
GSM1854907	B
GSM1854908	B
GSM1854909	A
GSM1854910	B
GSM1854911	B
GSM1854913	B
GSM1854915	B
GSM1854916	B
GSM1854917	B
GSM1854918	B
GSM1854919	B
GSM1854920	B
GSM1854921	A
GSM1854922	B
GSM1854923	B
GSM1854924	B
GSM1854925	B
GSM1854926	B
GSM1854927	B
GSM1854928	B
GSM1854929	B
GSM1854930	B
GSM1854931	B
GSM1854932	A
GSM1854933	A
GSM1854934	B
GSM1854935	A
GSM1854936	B
GSM1854937	B
GSM1854938	A
GSM1854940	B
GSM1854941	B
GSM1854942	B
GSM1854944	B
GSM1854945	A
GSM1854947	B
GSM1854948	B
GSM1854950	B
GSM1854951	B
GSM1854952	B
GSM1854953	B
GSM1854954	A
GSM1854955	B
GSM1854956	A
GSM1854957	B
GSM1854958	B
GSM1854960	A
GSM1854961	A
GSM1854962	B
GSM1854963	A
GSM1854964	B
GSM1854965	A
GSM1854966	B
GSM1854967	B
GSM1854969	A
GSM1854970	B
GSM1854971	B
GSM1854972	B
GSM1854973	A
GSM1854974	B
GSM1854975	A
GSM1854977	B
GSM1854979	B
GSM1854980	B
GSM1854981	A
GSM1854983	A
GSM1854984	B
GSM1854985	B
GSM1854986	A
GSM1854987	B
GSM1854988	B
GSM1854989	B
GSM1854990	B
GSM1854992	A
GSM1854994	B
GSM1854995	A
GSM1854996	B
GSM1854997	B
GSM1854998	B
GSM1854999	B
GSM1855000	A
GSM1855001	B
GSM1855003	B
GSM1855004	B
GSM1855005	A
GSM1855006	A
GSM1855007	B
GSM1855008	B
GSM1855009	A
GSM1855010	A
GSM1855011	A
GSM1855012	A
GSM1855014	B
GSM1855015	B
GSM1855016	A
GSM1855018	B
GSM1855019	A
GSM1855020	A
GSM1855021	A
GSM1855022	B
GSM1855023	A
GSM1855024	B
GSM1855026	B
GSM1855027	A
GSM1855028	A
GSM1855029	A
GSM1855031	B
GSM1855032	B
GSM1855033	A
GSM1855034	B
GSM1855035	B
GSM1855036	B
GSM1855037	A
GSM1855038	A
GSM1855039	A
GSM1855040	B
GSM1855041	B
GSM1855042	B
GSM1855043	B
GSM1855044	B
GSM1855045	B
GSM1855046	B
GSM1855047	A
GSM1855048	A
GSM1855049	A
GSM1855050	B
GSM1855051	B
GSM1855052	A
GSM1855053	B
GSM1855054	B
GSM1855055	B
GSM1855056	B
GSM1855057	A
GSM1855059	B
GSM1855060	A
GSM1855061	B
GSM1855062	A
GSM1855063	B
GSM1855064	B
GSM1855065	A
GSM1855066	B
GSM1855067	B
GSM1855068	A
GSM1855069	A
GSM1855070	B
GSM1855071	B
GSM1855072	B
GSM1855073	B
GSM1855074	B
GSM1855075	B
GSM1855076	B
GSM1855077	B
GSM1855078	A
GSM1855079	A
GSM1855080	A
GSM1855081	A
GSM1855082	B
GSM1855083	A
GSM1855084	B
GSM1855085	A
GSM1855086	B
GSM1855087	B
GSM1855088	B
GSM1855089	B
GSM1855091	B
GSM1855092	B
GSM1855093	B
GSM1855094	A
GSM1855095	A
GSM1855096	A
GSM1855097	B
GSM1855098	B
GSM1855099	B
GSM1855100	B
GSM1855101	A
GSM1855102	B
GSM1855103	A
GSM1855104	B
GSM1855105	B
GSM1855106	A
GSM1855107	A
GSM1855108	A
GSM1855109	A
GSM1855110	B
GSM1855111	B
GSM1855112	B
GSM1855113	B
GSM1855114	A
GSM1855116	A
GSM1855117	A
GSM1855118	A
GSM1855119	A
GSM1855120	A
GSM1855121	B
GSM1855122	A
GSM1855123	B
GSM1855124	A
GSM1855125	A
GSM1855126	A
GSM1855127	B
GSM1855128	A
GSM1855129	B
GSM1855131	A
GSM1855132	B
GSM1855133	B
GSM1855134	B
GSM1855135	A
GSM1855136	A
GSM1855137	A
GSM1855138	A
GSM1855140	B
GSM1855141	B
GSM1855142	A
GSM1855143	B
GSM1855144	B
GSM1855145	B
GSM1855146	B
GSM1855147	A
GSM1855149	B
GSM1855150	A
GSM1855151	B
GSM1855152	B
GSM1855153	A
GSM1855156	B
GSM1855157	B
GSM1855158	B
GSM1855159	B
GSM1855160	B
GSM1855161	B
GSM1855162	B
GSM1855163	A
GSM1855164	A
GSM1855165	B
GSM1855166	A
GSM1855168	B
GSM1855169	B
GSM1855170	B
GSM1855171	A
GSM1855172	B
GSM1855173	A
GSM1855174	A
GSM1855175	A
GSM1855176	A
GSM1855177	B
GSM1855178	A
GSM1855179	A
GSM1855180	B
GSM1855181	B
GSM1855182	B
GSM1855183	A
GSM1855184	B
GSM1855185	A
GSM1855187	B
GSM1855188	B
GSM1855189	B
GSM1855190	A
GSM1855192	A
GSM1855193	A
GSM1855195	A
GSM1855196	B
GSM1855198	A
GSM1855199	A
GSM1855200	B
GSM1855202	B
GSM1855203	A
GSM1855204	A
GSM1855206	A
GSM1855207	A
GSM1855208	A
GSM1855209	A
GSM1855210	B
GSM1855211	A
GSM1855212	B
GSM1855213	B
GSM1855214	B
GSM1855215	B
GSM1855217	B
GSM1855218	B
GSM1855219	A
GSM1855220	A
GSM1855221	B
GSM1855222	B
GSM1855223	B
GSM1855224	A
GSM1855225	A
GSM1855226	B
GSM1855228	B
GSM1855229	B
GSM1855230	A
GSM1855231	A
GSM1855232	A
GSM1855234	A
GSM1855235	A
GSM1855236	B
GSM1855237	A
GSM1855238	A
GSM773540	A
GSM773541	A
GSM773542	B
GSM773543	B
GSM773544	B
GSM773545	B
GSM773546	A
GSM773547	B
GSM773548	A
GSM773549	B
GSM773550	A
GSM773551	B
GSM773552	A
GSM773553	B
GSM773554	B
GSM773555	A
GSM773556	A
GSM773557	A
GSM773558	A
GSM773559	A
GSM773560	A
GSM773561	B
GSM773562	B
GSM773563	A
GSM773564	B
GSM773565	A
GSM773566	B
GSM773567	B
GSM773568	A
GSM773569	B
GSM773570	B
GSM773571	A
GSM773572	A
GSM773573	A
GSM773574	A
GSM773575	A
GSM773576	B
GSM773577	B
GSM773578	A
GSM773579	B
GSM773580	A
GSM773581	A
GSM773582	A
GSM773583	B
GSM773584	A
GSM773585	A
GSM773586	A
GSM773587	B
GSM773588	B
GSM773589	A
GSM773590	A
GSM773591	A
GSM773592	A
GSM773593	A
GSM773594	B
GSM773595	B
GSM773596	B
GSM773597	A
GSM773598	A
GSM773599	A
GSM773600	A
GSM773601	A
GSM773602	B
GSM773603	A
GSM773604	A
GSM773605	B
GSM773606	B
GSM773607	B
GSM773608	B
GSM773609	B
GSM773610	B
GSM773611	B
GSM773612	B
GSM773613	A
GSM773614	A
GSM773615	B
GSM773616	A
GSM773617	B
GSM773618	B
GSM773619	B
GSM773620	B
GSM773621	A
GSM773622	B
GSM773623	B
GSM773624	B
GSM773625	B
GSM773626	B
GSM773627	B
GSM773628	A
GSM773629	B
GSM773630	A
GSM773631	B
GSM773632	B
GSM773633	A
GSM773634	B
GSM773635	B
GSM773636	A
GSM773637	B
GSM773638	B
GSM773639	A
GSM773640	A
GSM773641	B
GSM773642	A
GSM773643	A
GSM773644	A
GSM773645	A
GSM773646	A
GSM773647	A
GSM773648	A
GSM773649	A
GSM773650	A
GSM773651	A
GSM773652	B
GSM773653	B
GSM773654	A
GSM773655	B
GSM773656	B
GSM773657	B
GSM773658	A
GSM773659	A
GSM773660	A
GSM773661	A
GSM773662	B
GSM773663	B
GSM773664	B
GSM773665	A
GSM773666	B
GSM773667	A
GSM773668	B
GSM773669	B
GSM773670	A
GSM773671	B
GSM773672	A
GSM773673	B
GSM773674	A
GSM773675	B
GSM773676	B
GSM773677	A
GSM773678	B
GSM773679	A
GSM773680	B
GSM773681	B
GSM773682	B
GSM773683	A
GSM773684	B
GSM773685	B
GSM773686	B
GSM773687	B
GSM773688	A
GSM773689	B
GSM773690	B
GSM773691	B
GSM773692	B
GSM773693	B
GSM773694	B
GSM773695	B
GSM773696	B
GSM773697	A
GSM773698	A
GSM773699	B
GSM773700	A
GSM773701	B
GSM773702	B
GSM773703	A
GSM773704	B
GSM773705	B
GSM773706	B
GSM773707	B
GSM773708	B
GSM773709	B
GSM773710	B
GSM773711	B
GSM773712	B
GSM773713	B
GSM773714	B
GSM773715	B
GSM773716	A
GSM773717	A
GSM773718	B
GSM773719	B
GSM773720	A
GSM773721	B
GSM773722	B
GSM773723	A
GSM773724	B
GSM773725	B
GSM773726	A
GSM773727	B
GSM773728	B
GSM773729	B
GSM773730	A
GSM773731	B
GSM773732	B
GSM773733	A
GSM773734	B
GSM773735	B
GSM773736	B
GSM773737	B
GSM773738	B
GSM773739	B
GSM773740	A
GSM773741	B
GSM773742	B
GSM773743	B
GSM773744	B
GSM773745	A
GSM773746	B
GSM773747	B
GSM773748	B
GSM773749	A
GSM773750	B
GSM773751	B
GSM773752	B
GSM773753	B
GSM773754	B
GSM773755	B
GSM773756	B
GSM773757	B
GSM773758	B
GSM773759	B
GSM773760	B
GSM773761	B
GSM773762	B
GSM773763	B
GSM773764	A
GSM773765	B
TCGA-05-4249	B
TCGA-05-4250	A
TCGA-05-4382	A
TCGA-05-4384	B
TCGA-05-4389	B
TCGA-05-4390	A
TCGA-05-4396	B
TCGA-05-4397	A
TCGA-05-4398	A
TCGA-05-4402	B
TCGA-05-4403	B
TCGA-05-4405	B
TCGA-05-4415	A
TCGA-05-4417	A
TCGA-05-4418	A
TCGA-05-4420	A
TCGA-05-4422	B
TCGA-05-4424	B
TCGA-05-4425	B
TCGA-05-4426	A
TCGA-05-4427	A
TCGA-05-4430	B
TCGA-05-4432	B
TCGA-05-4433	B
TCGA-05-4434	B
TCGA-05-5420	A
TCGA-05-5423	B
TCGA-05-5425	B
TCGA-05-5428	A
TCGA-05-5429	B
TCGA-05-5715	B
TCGA-35-3615	B
TCGA-35-4122	A
TCGA-35-4123	A
TCGA-35-5375	B
TCGA-38-4625	A
TCGA-38-4626	B
TCGA-38-4627	B
TCGA-38-4628	A
TCGA-38-4629	A
TCGA-38-4630	A
TCGA-38-4631	A
TCGA-38-4632	A
TCGA-38-6178	B
TCGA-38-7271	B
TCGA-38-A44F	B
TCGA-44-2655	B
TCGA-44-2656	B
TCGA-44-2657	B
TCGA-44-2659	B
TCGA-44-2661	B
TCGA-44-2662	A
TCGA-44-2665	A
TCGA-44-2666	B
TCGA-44-2668	A
TCGA-44-3396	A
TCGA-44-3398	B
TCGA-44-3917	A
TCGA-44-3918	A
TCGA-44-3919	B
TCGA-44-4112	B
TCGA-44-5643	B
TCGA-44-5644	A
TCGA-44-5645	B
TCGA-44-6145	B
TCGA-44-6146	B
TCGA-44-6147	B
TCGA-44-6148	B
TCGA-44-6774	A
TCGA-44-6775	B
TCGA-44-6776	B
TCGA-44-6777	A
TCGA-44-6778	B
TCGA-44-6779	A
TCGA-44-7659	B
TCGA-44-7660	A
TCGA-44-7661	B
TCGA-44-7662	A
TCGA-44-7667	A
TCGA-44-7669	B
TCGA-44-7670	B
TCGA-44-7671	B
TCGA-44-7672	A
TCGA-44-8117	A
TCGA-44-8119	A
TCGA-44-8120	B
TCGA-44-A479	A
TCGA-44-A47A	B
TCGA-44-A47B	A
TCGA-44-A47G	A
TCGA-44-A4SS	A
TCGA-44-A4SU	A
TCGA-49-4486	B
TCGA-49-4487	A
TCGA-49-4488	A
TCGA-49-4490	B
TCGA-49-4494	A
TCGA-49-4501	B
TCGA-49-4505	A
TCGA-49-4506	A
TCGA-49-4507	A
TCGA-49-4510	B
TCGA-49-4512	A
TCGA-49-4514	B
TCGA-49-6742	B
TCGA-49-6743	A
TCGA-49-6744	B
TCGA-49-6745	B
TCGA-49-6761	A
TCGA-49-6767	A
TCGA-49-AAQV	A
TCGA-49-AAR0	B
TCGA-49-AAR2	A
TCGA-49-AAR3	A
TCGA-49-AAR4	A
TCGA-49-AAR9	A
TCGA-49-AARE	A
TCGA-49-AARN	B
TCGA-49-AARO	A
TCGA-49-AARQ	A
TCGA-49-AARR	B
TCGA-4B-A93V	A
TCGA-50-5044	A
TCGA-50-5045	A
TCGA-50-5049	A
TCGA-50-5051	B
TCGA-50-5055	B
TCGA-50-5066	B
TCGA-50-5068	B
TCGA-50-5072	A
TCGA-50-5930	A
TCGA-50-5931	A
TCGA-50-5932	B
TCGA-50-5933	A
TCGA-50-5935	B
TCGA-50-5936	A
TCGA-50-5939	A
TCGA-50-5941	B
TCGA-50-5942	B
TCGA-50-5944	B
TCGA-50-5946	A
TCGA-50-6590	A
TCGA-50-6591	A
TCGA-50-6592	A
TCGA-50-6593	B
TCGA-50-6594	A
TCGA-50-6595	A
TCGA-50-6597	B
TCGA-50-6673	B
TCGA-50-7109	A
TCGA-50-8457	B
TCGA-50-8459	A
TCGA-50-8460	B
TCGA-53-7624	A
TCGA-53-7626	B
TCGA-53-7813	A
TCGA-53-A4EZ	A
TCGA-55-1592	B
TCGA-55-1594	A
TCGA-55-1595	A
TCGA-55-1596	B
TCGA-55-5899	A
TCGA-55-6543	B
TCGA-55-6642	A
TCGA-55-6712	A
TCGA-55-6968	A
TCGA-55-6969	A
TCGA-55-6970	B
TCGA-55-6971	A
TCGA-55-6972	B
TCGA-55-6975	A
TCGA-55-6978	A
TCGA-55-6979	A
TCGA-55-6980	B
TCGA-55-6981	A
TCGA-55-6982	A
TCGA-55-6983	B
TCGA-55-6984	A
TCGA-55-6985	A
TCGA-55-6986	B
TCGA-55-6987	A
TCGA-55-7227	B
TCGA-55-7281	A
TCGA-55-7283	B
TCGA-55-7284	B
TCGA-55-7570	A
TCGA-55-7573	B
TCGA-55-7574	B
TCGA-55-7576	A
TCGA-55-7724	B
TCGA-55-7725	B
TCGA-55-7726	A
TCGA-55-7727	B
TCGA-55-7728	A
TCGA-55-7815	A
TCGA-55-7816	B
TCGA-55-7903	A
TCGA-55-7907	B
TCGA-55-7910	A
TCGA-55-7911	A
TCGA-55-7913	A
TCGA-55-7914	B
TCGA-55-7994	A
TCGA-55-7995	B
TCGA-55-8085	A
TCGA-55-8087	B
TCGA-55-8089	A
TCGA-55-8090	A
TCGA-55-8091	B
TCGA-55-8092	B
TCGA-55-8094	A
TCGA-55-8096	A
TCGA-55-8097	B
TCGA-55-8203	A
TCGA-55-8204	B
TCGA-55-8205	B
TCGA-55-8206	B
TCGA-55-8207	B
TCGA-55-8208	B
TCGA-55-8299	B
TCGA-55-8301	A
TCGA-55-8302	A
TCGA-55-8505	B
TCGA-55-8506	A
TCGA-55-8507	B
TCGA-55-8508	A
TCGA-55-8510	B
TCGA-55-8511	A
TCGA-55-8512	B
TCGA-55-8513	B
TCGA-55-8514	B
TCGA-55-8614	B
TCGA-55-8615	A
TCGA-55-8616	B
TCGA-55-8619	B
TCGA-55-8620	A
TCGA-55-8621	B
TCGA-55-A48X	B
TCGA-55-A48Y	B
TCGA-55-A48Z	A
TCGA-55-A490	A
TCGA-55-A491	A
TCGA-55-A492	B
TCGA-55-A493	A
TCGA-55-A494	A
TCGA-55-A4DF	B
TCGA-55-A4DG	B
TCGA-55-A57B	B
TCGA-62-8394	B
TCGA-62-8395	B
TCGA-62-8397	A
TCGA-62-8398	A
TCGA-62-8399	B
TCGA-62-8402	A
TCGA-62-A46O	A
TCGA-62-A46P	B
TCGA-62-A46R	A
TCGA-62-A46S	B
TCGA-62-A46U	A
TCGA-62-A46V	A
TCGA-62-A46Y	B
TCGA-62-A470	B
TCGA-62-A471	A
TCGA-62-A472	B
TCGA-64-1676	A
TCGA-64-1677	A
TCGA-64-1678	A
TCGA-64-1679	A
TCGA-64-1680	B
TCGA-64-1681	B
TCGA-64-5774	A
TCGA-64-5775	A
TCGA-64-5778	A
TCGA-64-5779	A
TCGA-64-5781	A
TCGA-64-5815	A
TCGA-67-3770	B
TCGA-67-3771	B
TCGA-67-3772	B
TCGA-67-3773	B
TCGA-67-3774	B
TCGA-67-4679	B
TCGA-67-6215	A
TCGA-67-6216	B
TCGA-67-6217	B
TCGA-69-7760	A
TCGA-69-7761	A
TCGA-69-7763	B
TCGA-69-7764	B
TCGA-69-7765	A
TCGA-69-7973	B
TCGA-69-7974	B
TCGA-69-7978	A
TCGA-69-7979	A
TCGA-69-7980	B
TCGA-69-8253	B
TCGA-69-8254	B
TCGA-69-8255	A
TCGA-69-8453	B
TCGA-69-A59K	A
TCGA-71-6725	A
TCGA-71-8520	A
TCGA-73-4658	B
TCGA-73-4659	B
TCGA-73-4662	B
TCGA-73-4666	A
TCGA-73-4668	A
TCGA-73-4670	A
TCGA-73-4675	B
TCGA-73-4676	B
TCGA-73-4677	B
TCGA-73-7498	B
TCGA-73-7499	A
TCGA-73-A9RS	A
TCGA-75-5125	A
TCGA-75-5146	B
TCGA-75-5147	B
TCGA-75-6206	B
TCGA-75-6212	B
TCGA-75-6214	A
TCGA-75-7025	B
TCGA-75-7027	A
TCGA-78-7143	B
TCGA-78-7145	A
TCGA-78-7146	A
TCGA-78-7147	B
TCGA-78-7148	B
TCGA-78-7149	B
TCGA-78-7150	B
TCGA-78-7152	B
TCGA-78-7153	B
TCGA-78-7154	B
TCGA-78-7155	A
TCGA-78-7156	B
TCGA-78-7158	B
TCGA-78-7159	A
TCGA-78-7160	B
TCGA-78-7161	A
TCGA-78-7162	B
TCGA-78-7163	B
TCGA-78-7166	A
TCGA-78-7167	B
TCGA-78-7220	B
TCGA-78-7535	A
TCGA-78-7536	B
TCGA-78-7537	A
TCGA-78-7539	B
TCGA-78-7540	B
TCGA-78-7542	A
TCGA-78-7633	B
TCGA-78-8640	A
TCGA-78-8648	B
TCGA-78-8655	A
TCGA-78-8660	B
TCGA-78-8662	A
TCGA-80-5608	A
TCGA-80-5611	B
TCGA-83-5908	A
TCGA-86-6562	B
TCGA-86-6851	A
TCGA-86-7701	A
TCGA-86-7711	A
TCGA-86-7713	A
TCGA-86-7714	B
TCGA-86-7953	B
TCGA-86-7954	B
TCGA-86-7955	A
TCGA-86-8054	A
TCGA-86-8055	A
TCGA-86-8056	B
TCGA-86-8073	B
TCGA-86-8074	A
TCGA-86-8075	B
TCGA-86-8076	B
TCGA-86-8278	B
TCGA-86-8279	A
TCGA-86-8280	B
TCGA-86-8358	A
TCGA-86-8359	A
TCGA-86-8585	A
TCGA-86-8668	B
TCGA-86-8669	B
TCGA-86-8671	B
TCGA-86-8672	A
TCGA-86-8673	A
TCGA-86-8674	B
TCGA-86-A456	B
TCGA-86-A4D0	A
TCGA-86-A4JF	A
TCGA-86-A4P7	B
TCGA-86-A4P8	B
TCGA-91-6828	B
TCGA-91-6829	B
TCGA-91-6830	B
TCGA-91-6831	A
TCGA-91-6835	B
TCGA-91-6836	A
TCGA-91-6840	A
TCGA-91-6847	A
TCGA-91-6848	A
TCGA-91-6849	B
TCGA-91-7771	B
TCGA-91-8496	B
TCGA-91-8497	B
TCGA-91-8499	B
TCGA-91-A4BC	A
TCGA-91-A4BD	B
TCGA-93-7347	B
TCGA-93-7348	B
TCGA-93-8067	B
TCGA-93-A4JN	B
TCGA-93-A4JO	B
TCGA-93-A4JP	B
TCGA-93-A4JQ	B
TCGA-95-7039	B
TCGA-95-7043	B
TCGA-95-7562	A
TCGA-95-7567	A
TCGA-95-7944	A
TCGA-95-7947	B
TCGA-95-7948	A
TCGA-95-8039	B
TCGA-95-8494	A
TCGA-95-A4VK	B
TCGA-95-A4VN	A
TCGA-95-A4VP	B
TCGA-97-7546	B
TCGA-97-7547	B
TCGA-97-7552	B
TCGA-97-7553	B
TCGA-97-7554	A
TCGA-97-7937	A
TCGA-97-7938	B
TCGA-97-7941	B
TCGA-97-8171	B
TCGA-97-8172	B
TCGA-97-8174	B
TCGA-97-8175	A
TCGA-97-8176	B
TCGA-97-8177	B
TCGA-97-8179	B
TCGA-97-8547	A
TCGA-97-8552	B
TCGA-97-A4LX	A
TCGA-97-A4M0	B
TCGA-97-A4M1	B
TCGA-97-A4M2	B
TCGA-97-A4M3	B
TCGA-97-A4M5	B
TCGA-97-A4M6	B
TCGA-97-A4M7	B
TCGA-99-7458	B
TCGA-99-8025	A
TCGA-99-8028	A
TCGA-99-8032	A
TCGA-99-8033	A
TCGA-99-AA5R	B
TCGA-J2-8192	B
TCGA-J2-8194	B
TCGA-J2-A4AD	B
TCGA-J2-A4AE	B
TCGA-J2-A4AG	B
TCGA-L4-A4E5	A
TCGA-L4-A4E6	B
TCGA-L9-A443	B
TCGA-L9-A444	A
TCGA-L9-A50W	B
TCGA-L9-A5IP	A
TCGA-L9-A743	A
TCGA-L9-A7SV	A
TCGA-L9-A8F4	A
TCGA-MN-A4N1	A
TCGA-MN-A4N4	A
TCGA-MN-A4N5	A
TCGA-MP-A4SV	B
TCGA-MP-A4SW	B
TCGA-MP-A4SY	A
TCGA-MP-A4T4	A
TCGA-MP-A4T6	A
TCGA-MP-A4T7	B
TCGA-MP-A4T8	A
TCGA-MP-A4T9	B
TCGA-MP-A4TA	A
TCGA-MP-A4TC	A
TCGA-MP-A4TD	B
TCGA-MP-A4TE	A
TCGA-MP-A4TF	A
TCGA-MP-A4TH	B
TCGA-MP-A4TI	A
TCGA-MP-A4TJ	B
TCGA-MP-A4TK	A
TCGA-MP-A5C7	B
TCGA-NJ-A4YF	A
TCGA-NJ-A4YG	A
TCGA-NJ-A4YI	B
TCGA-NJ-A4YP	A
TCGA-NJ-A4YQ	A
TCGA-NJ-A55A	B
TCGA-NJ-A55O	B
TCGA-NJ-A55R	B
TCGA-NJ-A7XG	A
TCGA-O1-A52J	B
TCGA-S2-AA1A	B
