# Supplementary material for: Identification of fatty acid-related subtypes, the establishment of a prognostic signature, and immune infiltration characteristics in lung adenocarcinoma
Source: Aging (Albany NY). 2023 May 16;15(10):4202–35. doi: 10.18632/aging.204725 (PMC10258028; doi:10.18632/aging.204725)
Supplement: Supplementary Table 6 [file aging-15-204725-s005.xlsx]

## Sheet: Sheet1
Supplementary Table 6. The GSVA results of different FARGs clusters.
id	TCGA_TCGA-55-8615	TCGA_TCGA-97-8177	TCGA_TCGA-86-8674	TCGA_TCGA-50-6592	TCGA_TCGA-91-A4BD	TCGA_TCGA-50-6590	TCGA_TCGA-50-5051	TCGA_TCGA-62-A471	TCGA_TCGA-67-3773	TCGA_TCGA-NJ-A7XG	TCGA_TCGA-91-6848	TCGA_TCGA-55-6986	TCGA_TCGA-86-6851	TCGA_TCGA-73-4677	TCGA_TCGA-78-7540	TCGA_TCGA-44-6775	TCGA_TCGA-69-8253	TCGA_TCGA-MP-A4T8	TCGA_TCGA-NJ-A55R	TCGA_TCGA-53-A4EZ	TCGA_TCGA-55-6970	TCGA_TCGA-86-8359	TCGA_TCGA-99-8032	TCGA_TCGA-50-7109	TCGA_TCGA-44-7667	TCGA_TCGA-NJ-A4YG	TCGA_TCGA-55-8302	TCGA_TCGA-64-1679	TCGA_TCGA-38-7271	TCGA_TCGA-50-6595	TCGA_TCGA-55-6968	TCGA_TCGA-44-8120	TCGA_TCGA-99-8025	TCGA_TCGA-50-6594	TCGA_TCGA-44-A479	TCGA_TCGA-86-8076	TCGA_TCGA-MP-A4TF	TCGA_TCGA-78-7161	TCGA_TCGA-38-4632	TCGA_TCGA-95-8039	TCGA_TCGA-86-8075	TCGA_TCGA-44-6147	TCGA_TCGA-69-7760	TCGA_TCGA-44-6148	TCGA_TCGA-64-1677	TCGA_TCGA-NJ-A55O	TCGA_TCGA-05-5420	TCGA_TCGA-97-8174	TCGA_TCGA-MP-A4SY
KEGG_N_GLYCAN_BIOSYNTHESIS	0.116682	-0.39925	0.260224	-0.0370467	-0.297252	-0.00973847	-0.158702	-0.0259828	-0.135246	0.0147157	0.252373	0.202223	0.000749707	0.314882	0.261237	-0.135547	0.301297	0.181678	0.197773	0.0537169	0.136787	0.148342	0.235601	0.385573	-0.167657	-0.249226	-0.195052	0.0163739	-0.239502	0.289152	-0.0981445	0.376017	-0.0909662	0.0354366	-0.0877163	-0.269198	0.222165	0.10478	0.40083	-0.198793	0.26657	-0.390992	-0.311857	-0.336781	0.332505	0.00256766	-0.0958544	-0.295239	-0.00486513
KEGG_OTHER_GLYCAN_DEGRADATION	0.0253732	0.451296	0.198526	-0.484109	0.218081	-0.35271	-0.320094	-0.506769	0.0495455	0.320965	-0.235787	0.22723	0.419742	0.345743	0.241663	0.0689532	0.327133	-0.40252	0.100656	-0.209265	-0.28135	-0.452492	-0.0719082	0.244495	-0.754141	0.0320016	-0.102493	-0.147571	-0.486352	-0.485095	-0.51157	0.330579	-0.75506	0.0266109	0.0175063	-0.218773	-0.215113	0.0684153	-0.396247	0.399007	0.375006	-0.400327	-0.556745	-0.056538	-0.167712	0.417145	0.251325	0.189796	0.334898
KEGG_O_GLYCAN_BIOSYNTHESIS	-0.270751	-0.133716	0.0364538	0.14559	0.0519751	-0.123733	-0.12966	-0.0900583	0.0727532	0.308506	0.10793	0.367724	-0.31298	-0.10301	0.435579	0.242384	0.0726621	-0.0937854	-0.0973891	-0.404537	-0.225955	0.556799	-0.412737	0.185484	-0.489336	-0.220415	-0.134966	0.426834	-0.00880716	0.295191	-0.327356	-0.251739	-0.586292	0.263262	0.0541422	-0.23726	-0.318047	0.0907561	-0.0308778	0.40322	0.401096	-0.0871073	0.377057	-0.258436	-0.0780722	0.270084	-0.247196	-0.469475	-0.0594074
KEGG_GLYCOSAMINOGLYCAN_DEGRADATION	-0.135681	0.305156	0.266109	-0.0585214	-0.16846	-0.379676	0.117624	-0.252194	-0.0691508	0.142193	0.0867564	0.116959	0.118588	0.582658	0.230537	0.00791236	0.455184	-0.400938	0.333448	-0.422007	0.0904879	-0.385506	-0.149744	-0.160907	-0.602698	-0.164535	-0.190129	-0.115681	0.0211651	0.297632	-0.530252	0.338813	-0.246964	0.100719	-0.128014	-0.239868	-0.339145	-0.059668	-0.276919	0.00390386	0.558492	-0.308513	0.0558569	0.0542673	-0.196347	0.45627	0.0267564	0.106366	0.134826
KEGG_GLYCOSAMINOGLYCAN_BIOSYNTHESIS_KERATAN_SULFATE	0.126859	-0.0864313	0.237526	0.247377	-0.561454	0.149248	0.0200678	-0.339618	-0.126067	-0.241718	0.160596	-0.371595	0.0843917	-0.0922308	0.220399	-0.30429	-0.263464	0.227728	-0.147392	-0.566508	-0.17064	0.507763	-0.038498	0.275779	-0.406294	-0.403353	-0.327571	0.421223	0.104515	0.284129	-0.0112292	0.0442064	-0.0570898	0.148876	0.149588	0.242851	0.00658486	-0.136431	0.191003	-0.398608	0.301688	-0.294945	-0.596327	-0.58459	-0.0238193	0.16648	-0.118595	-0.355039	0.0402063
KEGG_GLYCEROLIPID_METABOLISM	0.0554163	0.28243	0.158108	-0.0960402	0.238698	-0.0949441	0.304331	0.224838	0.109822	-0.0338078	0.00457778	-0.156201	0.104647	0.0596659	0.224892	-0.0707662	0.308055	-0.13604	0.337962	0.346044	-0.0522818	-0.0318904	0.0938777	-0.211827	-0.247302	0.346873	0.00952923	-0.0569166	-0.148501	-0.12772	-0.0287071	-0.0965349	-0.0227497	-0.115017	0.291482	0.133271	-0.302553	0.16171	-0.0149231	-0.0781635	0.102263	-0.142914	0.0265409	-0.121297	-0.213485	0.0888327	-0.100371	0.0267645	0.0703624
KEGG_GLYCOSYLPHOSPHATIDYLINOSITOL_GPI_ANCHOR_BIOSYNTHESIS	0.206094	-0.135619	0.455635	-0.319422	0.21346	-0.519718	-0.124935	-0.0745034	0.226731	0.340188	-0.246108	0.0258414	-0.374407	0.534207	-0.00669417	0.0383811	0.1576	0.198061	0.253767	0.0841355	0.231141	-0.429266	-0.0263701	-0.315499	-0.347991	-0.18112	0.126913	-0.378621	-0.692022	-0.379901	-0.345991	0.500391	-0.371475	0.117838	-0.184754	-0.34272	0.568786	0.401458	0.466292	-0.0596504	-0.1046	-0.033619	-0.213653	0.271176	0.0777464	0.399929	0.127756	0.32859	0.0683845
KEGG_GLYCEROPHOSPHOLIPID_METABOLISM	0.294897	0.00474335	-0.126185	-0.0400639	0.00918489	-0.192332	0.177254	-0.0521882	0.00801954	0.271244	-0.227056	-0.201641	0.0590776	0.172654	0.223647	-0.197948	0.0048736	-0.0324332	0.124568	0.012701	-0.127507	0.0884774	0.103043	-0.0871726	-0.171623	0.192574	-0.0517578	-0.205145	-0.135497	-0.298599	-0.110284	0.1365	-0.0583069	-0.109306	-0.00832883	-0.111115	-0.196749	0.0286223	-0.10907	0.0662223	-0.0956623	-0.087292	0.0226673	-0.0702602	-0.286737	0.386753	-0.146209	0.228493	0.116129
KEGG_ETHER_LIPID_METABOLISM	0.262454	0.193908	-0.146044	0.0207282	-0.0319399	-0.045625	0.0382992	-0.0963099	-0.185938	-0.202715	-0.122647	0.0335644	-0.19738	0.113546	0.393688	-0.304471	0.138108	-0.0269903	0.0329543	-0.223687	0.3171	0.190213	0.326195	-0.122799	-0.176446	-0.197162	-0.129489	-0.14817	0.11704	-0.416833	-0.0607688	0.190759	-0.269221	-0.173677	0.311075	0.305694	-0.339951	0.165431	-0.0650681	-0.217575	-0.226606	-0.152335	-0.231377	-0.100702	-0.109714	0.608998	0.191884	0.271729	-0.0758589
KEGG_ARACHIDONIC_ACID_METABOLISM	0.122018	0.398025	0.102262	0.0134632	0.520479	-0.206938	0.329536	0.181291	0.295303	-0.106521	-0.461493	-0.233007	-0.184745	0.186849	0.255107	-0.292515	0.21226	-0.195529	0.508622	0.220494	0.0260062	-0.0663214	0.187775	-0.329162	-0.392385	0.182883	-0.0873644	-0.305248	0.302255	-0.548916	-0.306564	-0.31874	-0.0680433	-0.167665	0.129257	0.328797	-0.510703	0.179809	-0.0122132	0.216683	-0.514517	-0.0651564	-0.0728876	0.217309	0.0970255	0.174098	0.408597	0.169921	-0.168226
KEGG_LINOLEIC_ACID_METABOLISM	0.239577	0.288841	0.285519	-0.146874	0.406075	-0.19444	0.450137	0.208119	0.176644	0.029395	-0.514728	-0.296613	0.0920889	0.0527184	0.569523	-0.21083	0.22067	-0.0112166	0.559324	0.29525	0.0140164	0.188048	0.266413	-0.171951	-0.303578	0.14708	-0.141272	-0.387145	0.0681363	-0.686137	-0.274329	-0.440926	-0.0821086	-0.147346	0.365798	0.498626	-0.36519	0.388687	-0.350207	-0.0410966	-0.482654	0.314785	0.296582	0.266119	0.314947	0.505599	0.399441	0.12297	-0.0314771
KEGG_ALPHA_LINOLENIC_ACID_METABOLISM	0.18922	0.419972	0.14849	-0.325725	0.266165	-0.254303	0.102313	-0.016086	0.0307955	0.182492	-0.3956	-0.0748156	-0.0605904	0.342057	0.252147	-0.208258	0.402444	0.105612	0.322415	-0.08671	-0.0896003	0.244156	0.20336	0.090295	-0.0939291	0.212262	-0.181662	-0.33623	0.228648	-0.676685	-0.254321	0.279563	-0.288708	0.0331248	0.30185	0.305627	-0.261276	0.165089	-0.355216	-0.101122	-0.423189	0.0701206	0.260751	-0.0829625	0.0444192	0.571564	0.390584	0.387277	-0.180485
KEGG_SPHINGOLIPID_METABOLISM	0.249407	0.0438625	0.108592	0.218198	-0.280929	0.145627	-0.0752401	-0.228712	0.0420253	-0.156977	0.00466058	0.336741	-0.144755	0.254825	0.21974	-0.0951572	-0.248213	-0.200825	0.186095	0.20973	0.0403689	-0.0149397	-0.0123947	0.482407	-0.432543	-0.0964795	0.042376	-0.0938089	-0.101115	0.0639045	-0.0594278	-0.307205	-0.361936	-0.356953	0.264619	-0.0331588	-0.137275	0.344283	0.129224	0.12565	0.436815	-0.247372	-0.221099	-0.131746	-0.119992	0.193058	0.105412	-0.134047	-0.112155
KEGG_GLYCOSPHINGOLIPID_BIOSYNTHESIS_LACTO_AND_NEOLACTO_SERIES	0.265345	-0.225365	0.164482	0.082959	0.0147363	-0.21101	0.421888	0.251625	-0.171723	-0.098435	-0.166161	-0.140092	0.0697494	-0.119756	0.502485	0.220945	0.109626	-0.0783641	0.00775353	0.3114	-0.135693	0.548861	0.108221	0.165442	-0.371053	0.134744	-0.0407646	0.213789	-0.126395	-0.183868	0.0377565	-0.237544	0.17762	-0.189258	0.0656387	0.355223	-0.476172	-0.21747	0.138398	-0.0761999	0.216062	-0.0964441	-0.0525704	-0.00351883	0.13564	0.428359	-0.0704891	-0.33792	-0.401995
KEGG_GLYCOSPHINGOLIPID_BIOSYNTHESIS_GLOBO_SERIES	-0.205307	0.394637	0.0373846	0.490627	-0.187937	-0.175758	-0.0905427	0.0561129	-0.356554	-0.0173677	0.255776	0.0523892	-0.0934401	0.0260031	0.141429	0.270942	0.0214927	-0.284009	0.165644	-0.234458	-0.297959	-0.11717	0.116351	0.255807	-0.293064	-0.269826	-0.0655434	0.0304223	0.0737168	0.367788	0.22917	-0.294979	-0.401544	0.0774127	0.109372	0.166023	-0.560685	0.134146	0.0101523	0.22461	0.491231	-0.379414	-0.163385	0.50834	-0.123186	0.413518	0.247675	-0.461766	0.279697
KEGG_GLYCOSPHINGOLIPID_BIOSYNTHESIS_GANGLIO_SERIES	-0.22383	0.0675436	0.282849	0.215671	0.51941	-0.172266	0.159418	-0.0988012	0.55644	0.119536	0.237567	0.133587	-0.132874	0.246261	-0.0921746	0.137202	0.227668	-0.261563	0.492451	-0.336194	-0.171036	-0.0497023	0.330924	0.265776	-0.631169	0.0176221	-0.354693	0.0918086	0.251682	-0.1328	-0.0972101	-0.0823185	-0.367358	-0.108077	0.0532902	0.172104	-0.130484	0.121877	0.163292	-0.0812765	-0.128943	-0.182977	0.142575	0.27059	-0.0948583	0.153471	0.281976	-0.0777424	0.173898
KEGG_RIBOFLAVIN_METABOLISM	-0.0364488	-0.254295	0.151984	0.0571129	-0.21041	-0.227926	0.281742	0.0618139	-0.0446602	0.258872	-0.103041	-0.238224	-0.292126	0.0913006	0.321994	0.262138	-0.0872363	0.383733	0.130214	0.520418	0.0511418	-0.104917	0.185505	0.241234	-0.0586391	0.0106019	-0.284086	-0.131202	-0.216825	-0.153404	0.479244	-0.217536	-0.127588	0.18054	0.261075	0.225817	0.450944	0.067689	0.0804315	-0.139428	0.0989735	-0.207264	0.118542	-0.577962	0.210968	0.275873	0.193886	-0.662764	0.349255
KEGG_NICOTINATE_AND_NICOTINAMIDE_METABOLISM	0.295519	-0.085408	0.106018	-0.0698999	-0.0914883	-0.129616	0.0730521	0.413522	0.103297	0.00570085	0.035826	0.151001	0.0125284	-0.0806896	-0.288826	0.103746	0.216749	0.310262	0.225682	0.199624	-0.0719495	0.399697	0.199348	-0.353846	-0.274242	0.041597	0.28066	0.252543	-0.0734425	0.0204573	-0.0355969	-0.431275	-0.0957638	-0.0287031	0.032426	-0.0400752	-0.112675	0.0811989	0.410714	-0.0590473	0.261943	-0.297826	0.0771939	-0.303849	0.161363	-0.176314	0.37305	-0.227994	0.103181
KEGG_PANTOTHENATE_AND_COA_BIOSYNTHESIS	-0.435437	0.378696	-0.108069	-0.0214619	0.163907	-0.046509	-0.56215	0.193827	0.186548	0.124689	0.0661535	-0.00452555	0.119644	-0.0931539	0.123298	-0.0310451	-0.0256688	-0.266502	0.177963	0.0609485	-0.0651925	-0.238221	-0.0237331	0.01578	-0.247827	0.128836	0.215335	0.316687	0.0047563	-0.329492	0.314334	0.224766	0.043012	0.291498	0.374016	0.143019	0.0603635	-0.507008	0.223905	0.19151	0.396229	-0.427777	0.0205633	-0.254104	0.0607468	0.290501	0.259368	0.518389	-0.286478
KEGG_AMINOACYL_TRNA_BIOSYNTHESIS	0.393775	-0.164439	0.504753	-0.20261	-0.209089	0.281052	-0.204716	0.437549	-0.134738	0.407668	0.133462	0.617881	-0.505985	0.414135	-0.561306	-0.287867	0.55724	0.533598	0.351943	-0.124138	0.378213	-0.135681	-0.187891	0.191627	0.602325	0.371575	-0.267397	-0.220146	-0.687755	0.410642	0.0666806	0.344763	-0.284646	0.427335	-0.190628	0.477372	0.195573	0.0178771	0.311851	-0.437766	-0.194866	-0.451974	0.143466	-0.218409	0.398454	-0.143174	-0.126043	-0.157062	0.462136
KEGG_BASAL_TRANSCRIPTION_FACTORS	-0.33779	-0.169581	0.0951558	0.166774	-0.529409	0.191431	-0.0161597	0.168821	-0.0179675	0.0463229	0.382499	0.0719209	-0.214804	0.00592075	-0.180239	0.124987	0.0693635	0.286186	-0.409817	0.139869	0.133363	-0.109204	-0.247023	0.406453	0.521312	-0.0681636	-0.351071	0.146466	-0.265715	0.186037	0.30875	0.2085	-0.0162533	0.130121	0.0319377	-0.273816	0.448469	0.0866045	0.0979462	-0.170744	0.213821	-0.0623597	0.0510634	-0.349792	0.172774	-0.368324	-0.0594359	-0.37081	0.38976
KEGG_NON_HOMOLOGOUS_END_JOINING	0.00231416	-0.301768	-0.116595	-0.177374	0.15004	-0.248634	-0.159124	0.154387	-0.186282	0.347538	0.34809	0.354	-0.0391843	-0.0818156	-0.442547	0.0231157	-0.0313332	0.474589	0.100498	-0.298227	0.453562	-0.359216	0.136933	-0.144614	0.500898	0.321136	-0.191626	-0.426083	-0.514662	0.28425	0.204905	-0.0287566	-0.368783	-0.186501	0.15132	-0.158785	0.516864	-0.166296	-0.0330446	0.171607	0.17019	-0.200138	0.418322	-0.251066	0.0591996	0.052856	0.0274935	-0.00520108	0.138494
KEGG_SNARE_INTERACTIONS_IN_VESICULAR_TRANSPORT	-0.487661	0.26555	0.0335266	-0.318682	0.10658	-0.20782	-0.315114	-0.145576	0.193108	-0.11362	-0.251702	-0.0942946	-0.332737	0.0376003	0.294717	-0.252289	0.167705	0.0270556	-0.272197	-0.263798	-0.136047	0.0469637	-0.3944	-0.201437	-0.264295	0.219088	0.146047	-0.0424825	-0.403895	-0.130343	-0.346624	0.366045	-0.0336332	0.258917	-0.293443	-0.402423	0.261725	-0.311576	0.0731734	0.0343658	-0.120102	-0.20052	-0.323678	-0.313817	-0.0563637	0.191306	0.172449	-0.025832	-0.0153662
KEGG_LYSOSOME	-0.212721	0.4236	0.0604988	-0.0882769	0.108587	-0.325066	-0.0676105	-0.351477	0.262761	0.0763807	-0.212436	0.0600297	0.178566	0.39303	0.329232	-0.157099	0.012651	-0.287769	-0.0561867	-0.105233	0.0467356	-0.39169	-0.346273	-0.176436	-0.402529	0.213035	-0.0552017	0.112076	-0.0389492	-0.134562	-0.312844	0.161479	-0.485128	0.103998	-0.17724	-0.265753	-0.306804	-0.235202	-0.0729179	0.262183	0.210448	-0.412279	-0.137865	-0.182592	-0.334526	0.356319	0.0300821	-0.000166211	0.261906
KEGG_CARDIAC_MUSCLE_CONTRACTION	0.114345	0.393366	0.289117	-0.100602	0.282875	-0.185591	0.385082	0.279893	0.41996	0.0419167	-0.339243	-0.285428	-0.384195	0.0922167	0.16563	-0.30676	0.225341	-0.210513	0.256393	0.206865	-0.0219022	-0.0153059	0.377744	-0.0973448	0.0307178	0.138162	-0.124661	-0.168833	-0.0987337	-0.0750573	0.00631155	0.0777919	0.226654	0.0567477	-0.263012	-0.097746	-0.3897	0.0259326	0.405846	-0.0362724	-0.33024	-0.229185	0.292334	-0.147178	0.342078	0.256315	0.409772	0.0374406	-0.321353
KEGG_RENIN_ANGIOTENSIN_SYSTEM	-0.0611889	0.442854	-0.304921	0.0609222	0.487319	-0.0126184	0.558733	-0.343796	0.323181	-0.118306	0.088951	-0.105595	-0.226869	0.26389	-0.331171	0.186943	0.292388	-0.121577	0.16396	-0.171855	0.043134	-0.267123	0.37955	-0.399442	-0.265329	-0.0905923	-0.0817215	0.295086	0.517496	0.110219	-0.516606	0.207474	-0.377413	-0.292033	0.0261182	0.337888	-0.288917	-0.0879321	0.223763	0.421519	-0.125893	0.117663	0.0806701	0.142216	-0.136459	0.219501	0.619893	0.454665	-0.142392
KEGG_CIRCADIAN_RHYTHM_MAMMAL	-0.0124589	-0.20328	-0.197775	-0.335075	-0.072631	-0.00863026	-0.253625	-0.241804	-0.294398	0.288085	-0.256403	-0.0720583	0.564602	0.322178	0.468467	0.170783	0.446532	0.164191	-0.0743434	-0.361881	-0.0920632	0.216836	-0.270185	-0.0300033	-0.554699	0.00554631	-0.102542	0.146141	0.0267333	-0.24703	-0.143553	0.292922	0.117352	-0.0697989	-0.105635	-0.306478	0.562432	0.333891	-0.515648	0.238329	0.481313	0.081823	-0.230472	0.377005	-0.59101	0.334124	-0.578066	0.167183	0.378631
KEGG_TASTE_TRANSDUCTION	0.278073	0.166822	0.221857	-0.335154	0.0970163	-0.139659	0.329192	0.100565	-0.0710415	-0.0376926	-0.219541	-0.00280178	0.401585	-0.110718	0.223521	0.169167	0.168169	0.126925	0.422579	0.292389	-0.139761	-0.0458762	0.441318	0.341342	-0.145573	0.102024	0.239175	-0.313737	-0.0602681	-0.464127	0.13014	-0.375127	0.0799718	-0.480283	0.373319	-0.0784214	-0.0872475	0.232004	-0.119648	-0.0561734	-0.210968	0.408712	0.200597	0.106451	0.00336242	0.282328	0.0521349	0.360405	-0.117705
KEGG_PROXIMAL_TUBULE_BICARBONATE_RECLAMATION	0.195518	0.342048	-0.138691	-0.262928	0.270067	-0.422698	0.152297	0.0371998	0.337688	0.384791	-0.512468	-0.212867	-0.533844	0.312505	0.234285	-0.392935	0.290856	-0.0373845	0.212031	0.397392	0.150431	-0.2336	0.361395	0.175767	-0.26884	-0.195936	-0.110629	-0.409466	0.106458	-0.365104	-0.171122	-0.111478	-0.490528	-0.0141967	-0.258222	-0.123337	-0.322713	0.180571	0.456028	-0.25296	-0.45443	-0.208978	-0.142821	0.134523	0.176603	0.549537	0.469648	0.231967	-0.417656
KEGG_PATHOGENIC_ESCHERICHIA_COLI_INFECTION	-0.252239	-0.0918719	-0.0414566	0.342432	-0.255875	0.177987	-0.0490451	-0.122636	-0.0563581	-0.114801	0.122018	-0.149436	-0.239607	-0.118146	0.227538	-0.164407	-0.104982	-0.221777	-0.446902	-0.0738639	-0.102357	0.0774708	-0.166659	-0.125919	0.0490843	0.0760169	0.228345	0.389242	0.257824	0.354543	0.000608955	0.267631	0.316951	0.114169	-0.310571	-0.337546	-0.0507064	-0.37719	0.295823	0.0892181	0.271837	-0.253918	0.0865886	-0.419483	0.0818799	-0.239226	0.0418461	-0.42752	0.301932
KEGG_SYSTEMIC_LUPUS_ERYTHEMATOSUS	-0.43972	0.560781	-0.530702	0.266387	0.273661	0.394276	-0.325181	-0.516298	0.445434	-0.43111	-0.0355612	0.035068	0.440251	-0.0180869	-0.180767	0.0175223	-0.260098	-0.471629	-0.368696	-0.336313	0.0227584	-0.25384	-0.179111	0.137913	-0.370726	0.329018	-0.14763	-0.0490726	0.572766	-0.12729	-0.117463	-0.442466	-0.45789	-0.412207	0.500732	0.548009	-0.48711	-0.359756	0.286558	0.400014	-0.0593978	-0.101397	-0.424515	-0.162791	0.0934175	-0.12766	0.632283	0.0271687	-0.378546
KEGG_PRIMARY_IMMUNODEFICIENCY	-0.639536	0.132951	-0.493872	0.343825	0.0706824	0.549756	-0.364602	-0.261787	0.409272	-0.627921	0.228637	-0.266481	0.723869	-0.374641	-0.496112	-0.154499	-0.341615	-0.584429	-0.180648	-0.191626	0.17652	0.0697386	0.000665523	0.189816	-0.487022	0.0931544	-0.241639	-0.531404	0.645548	-0.305567	0.392182	-0.408863	-0.556991	-0.397017	0.607655	0.635474	-0.291805	-0.623341	0.0848495	0.190164	-0.412738	0.0035003	-0.496945	-0.397218	0.417339	-0.166667	0.646029	0.194713	-0.6152
KEGG_HYPERTROPHIC_CARDIOMYOPATHY_HCM	0.039819	0.203113	-0.429057	0.0350198	-0.140131	0.0463264	-0.0309117	-0.257293	0.179979	-0.23035	0.0433111	-0.174958	0.0479375	-0.260566	0.0819037	0.214644	-0.176219	-0.117851	0.103257	-0.284619	-0.214441	0.222042	0.241635	-0.109535	-0.357818	0.00873018	-0.0697502	0.278144	0.333935	0.142215	-0.208885	0.24793	0.0530945	-0.219611	-0.0194186	-0.080399	-0.10809	0.132715	0.0667061	0.0546793	0.218984	0.278604	0.112522	-0.00719973	-0.271452	0.130858	0.0474175	0.27574	0.130834
KEGG_ARRHYTHMOGENIC_RIGHT_VENTRICULAR_CARDIOMYOPATHY_ARVC	0.0819937	-0.0713771	-0.37901	0.0630418	-0.217097	0.0391053	0.00335673	-0.231564	-0.0228255	-0.220121	0.0386076	0.0780789	-0.0712994	-0.0428228	0.303144	0.243311	0.0983134	-0.0539044	0.156124	-0.412657	0.018998	0.085355	0.239758	-0.168601	-0.228304	0.0115136	-0.00269083	0.3535	0.382063	0.235051	-0.193138	0.186046	0.192875	-0.174659	-0.0339764	-0.00854048	0.0311286	0.0503719	-0.208372	0.0709052	0.303016	0.263633	0.221008	0.155441	-0.242613	0.0117474	-0.258452	0.198793	0.247685
KEGG_DILATED_CARDIOMYOPATHY	0.0840216	0.179032	-0.491503	-0.0723185	-0.162058	0.124914	-0.0154533	-0.340377	0.182171	-0.217168	0.110125	-0.0764639	0.107012	-0.275029	-0.0038864	0.191912	-0.0482798	-0.211012	0.113145	-0.370155	-0.228537	0.211747	0.285584	-0.0310719	-0.348981	-0.0301938	-0.0491131	0.297301	0.38162	0.122443	-0.179563	0.321952	0.140741	-0.224218	-0.0489782	-0.0958939	-0.192851	0.0889351	-0.0497017	0.141422	0.253268	0.277953	0.0873669	0.0872255	-0.296731	0.0341602	-0.0818676	0.232881	0.122891
KEGG_GLYCOLYSIS_GLUCONEOGENESIS	0.00431153	0.381405	0.175094	0.169239	0.278556	0.126558	0.246089	0.35017	0.0987889	-0.191711	-0.324259	0.0569418	-0.11045	0.12935	-0.145806	-0.314761	0.231084	-0.00533153	0.266021	0.184747	-0.0479317	-0.10693	-0.156282	-0.21415	0.0860114	-0.145647	0.282951	0.0851437	-0.383976	-0.126712	0.0250817	-0.358328	-0.0927622	0.332735	-0.35696	0.325894	-0.142441	-0.319466	0.271728	-0.259572	-0.0854678	-0.39385	0.211248	-0.104125	-0.00594877	-0.069419	0.208175	-0.235986	0.0199127
KEGG_CITRATE_CYCLE_TCA_CYCLE	0.226407	0.189189	0.514412	-0.184722	-0.128857	-0.0663617	0.162889	0.476051	-0.0142238	-0.166407	-0.189436	0.122835	-0.587252	0.407446	-0.327069	-0.480054	0.238691	0.307433	0.414968	0.3795	0.535632	-0.0179192	0.067385	0.0188016	0.494986	-0.361084	-0.0910698	-0.201896	-0.448247	-0.0244682	0.121025	0.185005	-0.253227	0.582704	-0.42866	-0.11162	-0.0118788	-0.12447	0.474929	-0.223354	-0.240126	-0.600621	0.154163	-0.385511	0.154612	0.320051	0.149854	-0.162297	-0.018891
KEGG_PENTOSE_PHOSPHATE_PATHWAY	0.0333467	0.310702	0.181246	0.38196	-0.0580498	0.163599	0.318752	0.382251	-0.0544292	-0.256129	0.0295959	0.0729674	-0.193297	0.00119956	-0.112641	-0.385513	0.0960086	-0.0725401	0.0504539	0.471585	-0.0378066	-0.0315978	-0.342125	-0.172348	0.431794	-0.192738	0.353589	0.325233	-0.357732	-0.0453791	0.131548	-0.208155	0.310452	0.495933	-0.424068	-0.0499035	-0.102115	-0.538464	0.110083	0.307353	0.015346	-0.533182	0.134392	-0.391375	-0.323466	-0.301194	-0.198008	-0.46144	-0.000876712
KEGG_PENTOSE_AND_GLUCURONATE_INTERCONVERSIONS	0.180656	0.168408	0.138995	0.215213	0.322899	-0.419277	0.179718	-0.204724	-0.197012	-0.301342	-0.553174	-0.129423	-0.0407936	0.45668	0.472055	-0.28797	0.309862	0.108166	0.0185103	0.351152	0.315412	-0.146632	-0.0148285	0.35716	-0.126301	-0.367889	0.35612	-0.178099	0.129134	-0.445605	-0.039132	0.158449	-0.355159	0.329325	-0.262731	-0.187248	-0.257358	0.348876	0.2823	-0.195752	-0.183807	-0.439541	0.24524	-0.0312445	0.16342	-0.291787	0.573873	-0.177861	-0.05367
KEGG_FRUCTOSE_AND_MANNOSE_METABOLISM	-0.0824351	0.36431	-0.190788	0.132927	-0.0638089	0.0516428	0.073086	0.0981602	-0.0607244	-0.0794087	-0.0864675	0.0141651	0.0238952	0.0511031	0.0117561	-0.122689	-0.131402	-0.132994	0.251202	0.199071	-0.0827573	-0.161824	-0.247262	-0.226785	0.0198417	-0.0623317	0.254086	0.451169	-0.349258	-0.146697	0.176309	-0.0408238	-0.217662	0.412325	-0.206229	0.0777996	0.155493	-0.197806	0.120875	-0.0951579	0.0764793	-0.320629	0.13538	-0.293093	-0.291279	0.245059	-0.00773071	-0.386522	0.367632
KEGG_GALACTOSE_METABOLISM	0.109647	0.107923	-0.218859	0.297839	0.052086	0.0226889	0.0663877	0.337578	-0.0799707	-0.244287	-0.164553	-0.165081	-0.072107	0.103224	-0.0679581	-0.312634	0.175843	0.0509832	0.0485642	0.26552	-0.149111	0.220983	-0.190969	-0.210003	-0.00629363	-0.345659	0.572654	0.264485	-0.347965	-0.1161	-0.180829	-0.0443417	-0.0831099	0.470411	-0.471619	-0.193389	0.045659	-0.168993	0.359259	0.0655024	-0.0582385	-0.43178	-0.0345523	-0.405931	-0.251368	0.0431691	-0.117166	-0.343357	0.211659
KEGG_ASCORBATE_AND_ALDARATE_METABOLISM	0.541088	0.362202	0.75516	0.150941	0.311015	-0.205884	0.661964	0.365056	0.293197	0.154372	-0.482437	0.162579	-0.214138	0.629379	0.221608	-0.126886	0.502683	0.103032	0.504388	0.123378	0.230177	-0.0661117	0.277341	0.192136	-0.218432	0.388572	-0.145922	-0.183978	0.348399	-0.35128	-0.0337036	0.114116	-0.127366	0.215369	0.275049	0.450577	-0.160509	0.637189	-0.184024	-0.463974	-0.0354475	-0.195134	0.065726	0.230644	-0.233856	-0.50285	0.487971	0.0882523	0.079583
KEGG_FATTY_ACID_METABOLISM	-0.00544274	0.427471	0.519343	-0.250519	0.487463	-0.468818	0.175826	0.24765	0.504628	0.242381	-0.48031	0.240819	-0.444777	0.563596	0.0155334	-0.194986	0.404353	-0.00869723	0.362722	0.146608	0.375337	0.116284	-0.402294	-0.13027	-0.236522	-0.0492065	-0.437154	-0.368272	-0.284648	-0.505347	-0.382903	0.302072	-0.209304	0.272384	-0.416085	0.443968	-0.453038	-0.0988578	0.259408	-0.0501283	-0.40025	-0.187873	-0.247656	0.442276	-0.0376786	0.291611	0.29135	0.320643	-0.27138
KEGG_STEROID_BIOSYNTHESIS	-0.247888	0.374254	0.301161	-0.333298	0.281569	-0.150765	-0.0406737	-0.0354261	0.173751	0.190285	-0.554318	-0.474102	-0.363428	0.372392	0.39834	-0.114562	0.262574	-0.0592762	-0.19432	0.290875	-0.280084	-0.0750624	-0.0427545	-0.488338	0.129408	0.376679	-0.306427	-0.228036	-0.208023	-0.209908	0.0657773	-0.00609788	0.336321	0.0100981	-0.359163	-0.226435	-0.431439	0.0965444	0.5317	-0.279168	-0.381347	-0.461978	0.061764	-0.492136	0.23	0.371272	0.468875	-0.525949	-0.274649
KEGG_PRIMARY_BILE_ACID_BIOSYNTHESIS	0.0475706	0.452731	0.378863	-0.229192	0.583257	-0.510241	-0.0392822	-0.356763	0.566049	0.362533	-0.550166	-0.120914	-0.116147	0.33584	0.122174	0.33386	0.0455301	-0.32374	0.378819	0.0769471	0.235037	-0.45195	-0.171912	-0.364423	-0.404295	0.360263	-0.522373	-0.337223	0.594077	-0.606785	-0.457903	0.218487	-0.173208	-0.143219	0.0818569	0.385459	-0.500051	-0.340132	0.161458	0.257274	-0.482886	0.263378	0.329958	0.387062	0.0192629	0.0147833	0.543916	0.26261	-0.00934694
KEGG_STEROID_HORMONE_BIOSYNTHESIS	0.0351952	0.364035	0.0449791	-0.00264552	0.455209	-0.213266	0.0947454	0.231811	0.205558	-0.00955094	-0.459558	-0.219235	0.156755	0.198889	0.313987	-0.109856	-0.00629736	0.224196	0.15131	-0.000627979	0.0834259	-0.169348	0.218981	-0.254618	-0.302322	0.3628	-0.081343	-0.052666	0.349626	-0.434705	-0.0902929	-0.261746	0.245686	-0.143357	0.213916	0.328293	-0.229202	0.171632	0.0711642	0.136756	-0.465435	0.250471	0.239172	-0.0434777	0.261873	-0.109208	0.570657	0.0787279	-0.257129
KEGG_OXIDATIVE_PHOSPHORYLATION	0.0313143	0.556134	0.489761	-0.365859	0.558383	-0.414348	0.527898	0.507891	0.524675	0.350759	-0.392993	-0.190709	-0.607506	0.393488	-0.142177	-0.57898	0.312664	-0.141079	0.211246	0.391424	0.205361	-0.216523	0.199763	0.0467185	0.352256	-0.0696414	-0.153681	-0.394468	-0.531029	-0.155572	0.0287955	0.0913614	0.156193	0.455304	-0.448857	-0.224031	-0.262315	-0.241026	0.571127	0.179722	-0.466653	-0.531799	0.244383	-0.321362	0.5608	0.171709	0.540677	-0.254439	-0.24362
KEGG_PURINE_METABOLISM	0.177497	-0.0103363	0.117624	-0.215557	0.019581	0.0521309	0.14766	0.107844	0.127889	0.0177579	0.151254	0.0861358	-0.334251	0.00225757	-0.294864	-0.201129	0.0583761	0.253405	0.0125667	0.0832437	0.048998	-0.0958247	0.0336919	-0.024329	0.323042	0.0589422	-0.0201767	-0.166973	-0.199171	0.226342	-0.045443	0.0327631	0.0967682	0.196111	-0.310374	-0.076695	0.00518634	-0.0502603	0.319986	0.0827217	-0.0975845	-0.155883	0.0529881	-0.171403	0.332238	-0.106097	0.217537	-0.200493	0.0500088
KEGG_PYRIMIDINE_METABOLISM	0.164152	-0.0933358	0.313988	0.0433868	0.034685	0.272738	0.02528	0.340379	0.152616	0.0809469	0.239865	0.108288	-0.366937	-0.152418	-0.218676	-0.34133	-0.0149015	0.219202	-0.205112	0.124108	0.00156361	-0.0443238	-0.401993	-0.11064	0.442868	0.155894	0.285435	-0.264186	-0.429595	0.340652	0.0749524	-0.084736	0.123927	0.435404	-0.429474	-0.3259	0.222451	-0.274282	0.473516	0.10625	-0.127456	-0.442754	0.0813497	-0.421112	0.402739	-0.398905	0.226658	-0.390668	0.237358
KEGG_ALANINE_ASPARTATE_AND_GLUTAMATE_METABOLISM	0.133232	0.326767	0.0416667	-0.0755491	-0.156698	-0.0415416	-0.0893266	0.12246	-0.354763	0.151974	-0.244471	0.00526523	-0.0912824	0.0332693	-0.23157	-0.111296	0.0146519	0.0719473	0.334575	0.317395	0.225229	0.107134	0.00128331	-0.40351	0.0747981	0.139284	-0.10378	-0.266194	-0.293224	-0.29884	-0.0475858	-0.0872071	-0.126895	0.307233	-0.0589845	0.216255	-0.116388	-0.177628	0.153321	0.0866022	-0.395469	0.0966988	-0.0428427	-0.175851	0.298943	0.191052	0.421374	-0.0844582	-0.218881
KEGG_GLYCINE_SERINE_AND_THREONINE_METABOLISM	-0.0770834	0.440943	-0.0760567	-0.146581	0.374001	-0.136359	0.375524	0.167392	0.0681048	-0.243051	-0.178654	-0.0871008	0.150463	0.0666231	-0.275056	-0.349128	-0.14899	0.106195	0.173916	0.345113	-0.0808409	0.0578404	0.30212	0.104755	0.26681	-0.311537	0.0334287	-0.196146	0.207879	-0.309231	-0.0388062	-0.393234	-0.274009	-0.123491	-0.00377071	0.168069	-0.50755	-0.0924349	0.302884	-0.0908097	-0.248871	-0.088535	0.186682	0.256764	0.326518	-0.344932	0.350503	-0.0155546	-0.255735
KEGG_CYSTEINE_AND_METHIONINE_METABOLISM	-0.0127908	-0.00101823	0.211406	-0.237888	0.104677	-0.176961	0.256355	0.249741	0.192686	-0.028969	0.100685	0.381041	-0.14998	0.161908	-0.282475	-0.0821268	0.248357	0.24897	-0.0795906	0.194375	0.26664	-0.00570185	-0.114915	0.0343865	0.3149	-0.161728	-0.0613606	-0.293326	-0.346166	-0.172881	0.00502907	-0.286991	-0.0728544	-0.0606688	0.0996276	-0.135256	-0.0311401	-0.0825829	0.365494	-0.190415	-0.178385	-0.176212	0.321765	-0.377421	0.257857	-0.00588529	0.250263	-0.321204	-0.0401885
KEGG_VALINE_LEUCINE_AND_ISOLEUCINE_DEGRADATION	0.195136	0.309447	0.442454	-0.170596	0.460074	-0.458655	0.0414921	-0.0210345	0.477517	0.292022	-0.496297	0.419102	-0.33802	0.553962	-0.270798	-0.208273	0.269171	-0.0133353	0.450539	0.346289	0.283452	-0.358479	-0.281902	0.0090409	0.0163342	0.109757	-0.523818	-0.167827	-0.296187	-0.484546	-0.276737	0.173465	-0.414331	0.218991	-0.190003	0.457912	-0.297159	0.0363813	-0.00581223	-0.337669	-0.25537	-0.31683	-0.206768	0.198465	0.0491365	0.186632	0.137231	0.296687	-0.236195
KEGG_LYSINE_DEGRADATION	0.250079	-0.268918	0.415116	-0.0336094	-0.162136	0.117068	0.199074	0.17249	-0.062386	-0.0235061	-0.101903	0.0702626	-0.116376	0.108749	-0.241534	-0.141788	0.177087	0.0654286	0.236064	0.356032	0.0951431	-0.140507	-0.232428	0.0439699	0.458685	-0.082062	-0.327232	0.150661	-0.343303	-0.101017	0.137742	0.0184679	-0.182186	0.104982	-0.309507	0.189903	0.104243	0.222519	-0.281875	-0.282628	-0.114413	-0.252141	-0.217272	0.0993736	-0.0932701	-0.116585	-0.445819	0.0739943	-0.0879582
KEGG_ARGININE_AND_PROLINE_METABOLISM	0.237778	0.422155	0.289665	-0.289644	0.167463	-0.164514	0.333123	0.288676	-0.066954	-0.0290983	-0.306194	0.0997927	-0.428008	0.268382	-0.197438	-0.338658	0.318282	0.160586	0.22567	0.197218	0.227064	-0.0255939	0.122344	-0.00630202	0.163029	-0.116564	-0.0191373	-0.0343426	-0.0404976	-0.246716	-0.0846853	-0.113407	-0.209256	0.12986	-0.0288679	0.412877	-0.340997	0.00732877	0.260379	-0.0423748	-0.312163	-0.174545	-0.00891871	-0.241766	0.157298	0.302972	0.371766	0.0487954	-0.0255121
KEGG_HISTIDINE_METABOLISM	0.189822	0.401722	0.438897	0.00554066	0.44575	-0.357207	0.537761	0.20609	0.285035	0.193537	-0.54573	0.0560375	-0.402814	0.55005	-0.0362177	-0.14261	0.528179	-0.261281	0.302401	-0.0332433	0.184933	-0.0986727	-0.0574921	0.102026	-0.43038	0.236972	-0.290778	-0.2241	-0.175178	-0.452433	-0.268575	-0.366927	-0.180093	-0.0112287	-0.0346892	0.558018	-0.41707	0.0638894	0.175265	0.0320969	-0.139503	0.0469125	0.0254624	0.370304	-0.333486	-0.0151816	0.323855	0.370704	-0.222983
KEGG_TYROSINE_METABOLISM	0.0822651	0.283181	0.310559	-0.146259	0.493797	-0.445985	0.557584	0.383894	0.25333	0.133432	-0.395737	0.0550667	-0.170945	0.476177	0.194725	-0.105886	0.516454	-0.0949458	0.417728	0.120612	-0.0268455	0.178592	-0.0329994	-0.275679	-0.431192	0.0653329	0.242913	-0.197362	-0.0541561	-0.381852	-0.299843	-0.20618	-0.0743317	-0.141515	-0.0848259	0.434636	-0.316509	-0.00919166	0.0919493	0.263695	-0.334053	0.118925	0.276692	0.28578	-0.205836	0.201707	0.426739	0.36681	-0.394397
KEGG_PHENYLALANINE_METABOLISM	0.412382	0.165691	0.345444	0.198178	0.458717	-0.407042	0.692352	0.413934	-0.222257	-0.0586507	-0.409982	-0.181552	-0.417745	0.565692	0.0339476	-0.498365	0.478482	-0.00547678	0.558454	0.166831	0.211624	0.201427	0.235656	-0.11514	-0.368694	0.00673643	0.32638	-0.254272	0.0677437	-0.377794	-0.338747	-0.4075	-0.016857	0.0519737	-0.194398	0.551367	-0.452712	-0.0189678	0.259044	0.315181	-0.507265	-0.119559	0.273436	0.16872	-0.146939	0.0825815	0.436619	0.357602	-0.317446
KEGG_TRYPTOPHAN_METABOLISM	0.314908	0.302724	0.368342	-0.0530942	0.311065	-0.101969	0.198396	-0.0194005	0.386584	-0.344254	-0.318842	-0.131927	-0.296603	0.395795	-0.232145	-0.0713971	0.106345	-0.165564	0.28218	0.161686	0.155362	0.161815	-0.223498	0.04594	-0.0294821	0.0476313	-0.386637	-0.192471	0.103435	-0.274578	-0.103905	-0.140288	-0.265951	-0.0704009	0.151583	0.565007	-0.482197	-0.0119084	0.198481	-0.159472	-0.298739	-0.18965	-0.139436	0.14764	0.0156572	-0.205965	0.396532	-0.0482465	-0.327495
KEGG_BETA_ALANINE_METABOLISM	-0.128716	0.329621	0.302781	-0.0393593	0.373132	-0.25986	0.222756	0.00236822	0.286025	-0.0157397	-0.331206	0.257812	-0.296991	0.369613	-0.212677	-0.25535	0.14202	-0.200788	0.283479	0.145713	0.273028	-0.125844	-0.0481025	-0.340105	0.0869481	0.148024	-0.0289756	0.00236737	-0.0380348	-0.325602	0.217287	0.506496	-0.220198	0.41999	-0.0353211	0.349108	-0.352018	-0.22881	-0.0497893	-0.114944	-0.286272	-0.226408	0.191375	0.0364957	-0.157051	0.150336	0.0193828	0.00319379	-0.0391377
KEGG_SELENOAMINO_ACID_METABOLISM	-0.101939	-0.084979	0.165383	0.0752975	0.287849	-0.431523	-0.105492	0.182499	0.372648	0.515697	-0.154174	0.465678	-0.297901	0.527421	-0.274244	-0.0782693	0.0398886	0.0726009	-0.24858	-0.306747	0.10554	-0.0221155	-0.559337	-0.0908443	0.318644	-0.0516447	-0.176006	-0.151157	-0.393331	-0.329331	-0.202097	-0.0915885	-0.223418	0.0495678	-0.00878167	-0.242997	0.0308483	-0.198571	0.450407	0.0526885	-0.0104059	-0.160807	0.21352	0.181143	-0.151511	0.0810561	0.343356	0.159276	-0.241276
KEGG_GLUTATHIONE_METABOLISM	-0.168023	0.29899	0.573168	0.0897393	0.39883	-0.0837107	0.321072	0.589688	0.0569588	-0.281229	-0.252092	-0.103441	-0.517934	0.209591	-0.178869	-0.536827	0.258198	-0.0787459	0.188542	0.335705	0.187544	-0.376117	-0.219009	-0.427669	0.0629319	-0.0232247	0.100433	-0.233171	-0.178758	-0.18997	0.113646	-0.18798	0.225503	0.031903	-0.178619	-0.261974	-0.37987	-0.430968	0.462561	-0.0285279	-0.363883	-0.471208	-0.168493	-0.218741	0.298061	0.0221509	0.393466	-0.232512	-0.130225
KEGG_STARCH_AND_SUCROSE_METABOLISM	0.00472474	0.176906	-0.0625473	0.406261	0.292062	0.0937618	-0.0879896	0.271759	0.0792587	-0.385787	-0.192929	-0.0643591	-0.165123	0.116054	0.240364	-0.103687	0.102706	-0.0760694	0.226306	0.271133	0.01563	-0.123729	0.00757597	0.0444579	-0.0894324	-0.291207	0.333024	0.276111	0.137748	0.0569735	0.0129712	-0.0456464	-0.330547	0.31034	-0.215493	-0.0743159	-0.0687233	0.0805376	0.030173	-0.0421583	0.0758621	-0.295708	-0.138474	0.0203843	-0.0130908	-0.00310939	0.120544	-0.376798	-0.131255
KEGG_AMINO_SUGAR_AND_NUCLEOTIDE_SUGAR_METABOLISM	-0.141796	0.367428	0.295536	0.168549	0.0751323	-0.263552	-0.399571	0.0975501	0.00764557	-0.26033	-0.206976	0.0618318	-0.0387214	0.214235	0.125586	-0.197447	0.235089	-0.309559	0.00777259	-0.0241323	0.144027	0.14777	-0.334762	-0.269382	-0.290405	-0.111195	0.271813	0.220303	-0.379192	-0.143898	-0.201507	0.11881	-0.262182	0.437943	-0.340252	-0.244232	-0.00498784	-0.388522	0.46236	0.0351934	0.145442	-0.40517	-0.286518	-0.351804	-0.232642	0.398786	0.263314	-0.237371	-0.115847
KEGG_GLYCOSAMINOGLYCAN_BIOSYNTHESIS_CHONDROITIN_SULFATE	0.350096	0.0677267	-0.130616	-0.104405	-0.314682	0.222911	-0.0010835	-0.262681	-0.350545	-0.00455854	0.548066	0.187952	0.364502	-0.152057	-0.149868	0.100076	-0.329205	0.38368	0.15117	-0.462035	-0.132882	0.420903	0.331764	0.23556	-0.117041	-0.433072	-0.040001	0.588558	0.43266	0.491477	-0.450486	0.448266	0.190586	-0.0185915	0.293522	-0.00819742	-0.207489	0.235283	0.247866	0.294315	0.441638	-0.0748252	-0.282513	0.173278	-0.383876	0.105826	-0.288411	-0.0642517	0.377509
KEGG_GLYCOSAMINOGLYCAN_BIOSYNTHESIS_HEPARAN_SULFATE	0.110608	0.0698054	-0.00816378	-0.118339	-0.285882	-0.0896773	-0.00668132	-0.0381758	-0.273334	0.250586	0.456191	0.190466	-0.02351	-0.0183072	0.251151	0.394502	0.182775	0.0268581	0.380408	-0.360095	-0.0573438	0.412003	0.431131	0.157385	-0.0107578	-0.352353	-0.0500902	0.484544	0.296529	0.260811	0.136437	0.507237	-0.08596	-0.184711	0.274801	-0.181163	-0.198291	0.197376	-0.0771373	-0.142298	0.605365	0.037838	-0.225561	0.32898	-0.0633775	-0.0614188	-0.271555	0.0620603	0.493608
KEGG_INOSITOL_PHOSPHATE_METABOLISM	0.105326	-0.246639	-0.156729	0.00886531	-0.393261	0.0156616	-0.0845074	-0.240961	-0.34003	0.0419051	0.016095	-0.196986	0.29196	0.188846	0.0180509	0.149186	0.00873033	0.218455	0.217153	0.236525	0.222178	0.162789	-0.161074	0.0908509	0.10316	-0.153088	-0.0102576	0.0811152	0.0693788	-0.186896	0.170825	0.236419	-0.353952	-0.139809	-0.073368	0.129902	-0.0489977	0.265031	-0.310102	0.0698662	0.0286443	0.0777152	-0.20299	0.171892	-0.463761	0.299218	-0.455501	0.259045	-0.337879
KEGG_PYRUVATE_METABOLISM	-0.0218737	0.268822	0.390859	-0.174007	0.309409	-0.0396662	0.193225	0.328064	0.178485	0.0105103	-0.317596	0.260876	-0.28661	0.361688	-0.349998	-0.202334	0.237891	0.144139	0.446328	0.352044	0.0778614	-0.113397	-0.00377759	0.0910138	0.309646	0.0806753	-0.156508	-0.317755	-0.479637	-0.283748	0.0949821	0.293909	0.0777633	0.205102	-0.203922	0.139835	-0.391804	0.0656733	0.293559	-0.370781	-0.227525	-0.41559	0.209981	-0.245019	0.251094	0.102347	0.250488	-0.105806	-0.0789508
KEGG_GLYOXYLATE_AND_DICARBOXYLATE_METABOLISM	-0.164105	-0.381777	0.402859	-0.148052	-0.0593936	-0.0103652	0.209352	0.460442	0.223397	-0.412853	-0.222237	-0.00460842	-0.302965	0.022452	-0.596762	-0.513618	0.158881	0.333933	0.138915	0.228881	0.262548	-0.160981	-0.0920389	-0.147792	0.352785	0.0750635	0.202935	-0.213758	-0.391847	-0.0909188	0.333731	-0.277853	-0.0709014	0.373373	-0.308038	-0.10918	-0.0166832	-0.166389	0.432516	-0.266612	-0.150118	-0.591544	-0.241796	-0.556418	0.236471	-0.366243	0.339185	-0.391228	-0.0856769
KEGG_PROPANOATE_METABOLISM	0.021522	0.38153	0.549856	-0.0330895	0.434456	-0.412283	0.182937	0.00243267	0.358589	-0.00332458	-0.425521	0.339193	-0.287433	0.599055	-0.221202	0.0346937	0.249025	-0.261622	0.335256	0.346571	0.429953	-0.374739	-0.274403	0.0808908	0.362901	-0.0553477	-0.519506	-0.271468	-0.425501	-0.406427	-0.116923	0.310106	-0.227753	0.22153	-0.347275	0.444273	-0.456751	0.124156	-0.0401413	-0.395395	-0.21858	-0.153994	-0.0302026	0.206257	-0.01559	-0.168384	0.130644	0.136382	-0.126532
KEGG_BUTANOATE_METABOLISM	0.314563	0.441915	0.457607	-0.239407	0.46303	-0.398473	0.163848	0.189803	0.268072	0.0513978	-0.584501	0.138885	-0.261083	0.458125	0.0556454	-0.153124	0.119834	-0.0623352	0.441978	0.375219	0.376735	-0.0772811	-0.234139	-0.163869	0.064068	0.382253	-0.375219	-0.289093	-0.299656	-0.517371	0.013041	0.0333561	-0.09278	0.00934502	-0.153645	0.382113	-0.447826	-0.0917095	0.0978714	-0.179621	-0.38604	-0.374572	-0.153814	0.175655	0.0864433	0.0465682	0.197441	-0.0834348	0.148168
KEGG_ONE_CARBON_POOL_BY_FOLATE	0.0296337	-0.331809	0.14287	0.276013	-0.143989	0.293057	0.507381	0.152305	-0.304731	-0.00742797	0.28966	0.483738	-0.0423578	-0.121363	-0.650819	-0.0571324	0.279569	0.384838	-0.0943813	0.574464	0.453932	-0.235657	0.213057	0.249821	0.50266	-0.0519469	0.116549	-0.361934	-0.438462	-0.11801	0.367412	-0.300367	-0.448061	0.293283	-0.228437	-0.0109759	0.0576959	-0.001134	0.293298	-0.332842	-0.116827	-0.194655	-0.0311756	-0.573603	0.162511	-0.178711	-0.156027	-0.290623	0.303282
KEGG_FOLATE_BIOSYNTHESIS	-0.552459	0.258827	0.651459	0.167952	0.0882364	-0.120987	0.559768	0.505345	0.0609682	0.0524429	0.10652	0.0519198	-0.385419	0.597937	0.0729627	-0.57783	0.637584	-0.339833	0.507114	-0.160893	0.399585	0.316146	0.539468	-0.00132412	-0.0694446	-0.100591	0.0675993	-0.420456	-0.00705102	0.307322	0.00853286	0.0108161	0.175855	-0.0592261	-0.287156	0.364244	0.503944	0.113084	0.409626	-0.468181	-0.288152	-0.608347	-0.378824	-0.421932	0.598177	0.397803	0.524882	-0.213169	-0.532676
KEGG_RETINOL_METABOLISM	-0.108429	0.274762	0.0395104	0.257271	0.503931	-0.0720127	0.426092	0.401635	0.323957	-0.0450835	-0.466573	-0.31803	-0.0267446	0.0909532	0.621872	0.0807894	0.143409	-0.173396	0.289141	0.25103	-0.203843	-0.135928	0.0507491	-0.3563	-0.460699	0.338569	-0.170734	-0.234	0.180881	-0.401201	-0.245809	-0.443446	0.210197	-0.0944665	0.186532	0.346395	-0.194357	0.206009	0.119201	-0.111457	-0.365055	0.317911	0.141644	0.325485	0.179414	0.255656	0.541138	-0.00437847	-0.204761
KEGG_PORPHYRIN_AND_CHLOROPHYLL_METABOLISM	0.203697	0.380648	0.585933	-0.0802745	0.275817	-0.152353	0.443024	0.217689	0.276447	0.19523	-0.385493	-0.178375	-0.439169	0.439613	-0.194887	-0.451393	0.224395	-0.027161	-0.0299995	0.174019	0.101862	-0.135186	-0.0909496	-0.120277	-0.266396	0.0739845	-0.159268	-0.389992	-0.125259	-0.260296	-0.374347	0.0635608	0.268488	0.151817	-0.186822	-0.0350539	-0.345611	-0.0837083	0.401307	0.142301	-0.270323	-0.597336	0.0451909	-0.0793054	0.258089	-0.362392	0.413872	-0.1066	-0.138204
KEGG_TERPENOID_BACKBONE_BIOSYNTHESIS	-0.244857	0.241753	0.485824	-0.375924	0.347669	-0.340909	-0.0631633	0.247979	0.0720845	0.0869028	-0.493846	-0.366881	-0.657612	0.640386	-0.0133779	-0.347368	0.523412	0.244936	0.409579	-0.0810394	0.22983	-0.438659	-0.139446	0.162745	0.378028	0.424388	-0.670768	-0.394923	-0.416772	-0.426362	-0.207006	0.248566	0.173945	-0.134664	-0.409925	-0.371474	-0.10501	-0.303182	0.417236	-0.408193	-0.436932	-0.454647	-0.420174	-0.446323	0.0919305	0.59509	0.620284	-0.393858	-0.314827
KEGG_NITROGEN_METABOLISM	0.2963	0.318489	0.159194	-0.289943	0.272946	-0.251549	0.448632	0.215005	0.131184	0.270445	-0.424258	0.0858011	-0.109497	0.218486	0.370876	0.183905	0.228309	-0.218319	0.373895	0.382617	0.0907322	0.237169	0.210455	0.164811	-0.306121	-0.019433	-0.176678	-0.254783	0.0407217	-0.46242	-0.105253	-0.470305	-0.398835	-0.221139	0.0770277	0.279244	-0.170459	0.160928	-0.0143864	-0.546993	-0.357784	0.393564	-0.13027	0.195035	0.40845	0.440463	0.53567	0.175867	-0.275281
KEGG_METABOLISM_OF_XENOBIOTICS_BY_CYTOCHROME_P450	-0.0725048	0.337487	0.47456	0.191586	0.522717	-0.395823	0.511557	0.509327	0.392737	0.0337778	-0.548424	-0.399077	-0.231996	0.339889	0.347099	-0.38021	0.380529	-0.238143	0.491011	0.291629	-0.049008	-0.354675	0.00100679	-0.291989	-0.476648	0.339397	-0.28638	-0.349767	0.118277	-0.550884	-0.299668	-0.46956	0.334429	-0.145597	0.0748449	0.520034	-0.372404	0.0172526	0.238466	-0.103972	-0.508784	0.123346	0.0274188	0.361113	0.272892	0.304264	0.481855	0.20405	-0.343884
KEGG_DRUG_METABOLISM_CYTOCHROME_P450	-0.129574	0.404436	0.353742	0.0132254	0.474321	-0.425721	0.408754	0.27012	0.349824	-0.0358885	-0.567621	-0.325189	-0.153985	0.330639	0.402283	-0.187146	0.268326	-0.306969	0.399461	0.127517	-0.104385	-0.268334	0.000983815	-0.277221	-0.527937	0.264823	-0.356226	-0.226756	0.211833	-0.457744	-0.449569	-0.447563	0.17741	-0.150596	0.122171	0.56002	-0.440845	0.105135	0.224388	-0.0489305	-0.380903	0.193583	0.0927679	0.507992	0.235359	0.24132	0.483984	0.390602	-0.309541
KEGG_DRUG_METABOLISM_OTHER_ENZYMES	0.240619	-0.0375647	0.207001	-0.070043	0.439622	0.136104	0.0975394	-0.0135423	-0.105499	0.192083	-0.156618	-0.0533634	0.065733	0.117694	0.502558	-0.190772	0.0643705	0.0388005	0.120195	0.140497	-0.131484	0.0792587	-0.332659	-0.202877	-0.170795	0.183181	0.256938	0.0266098	-0.0185583	-0.0591187	-0.325329	-0.40091	0.319199	0.417162	-0.102792	-0.0912083	-0.046176	0.0219744	0.18146	-0.114681	-0.290574	-0.254682	0.227375	-0.248161	0.418906	-0.174654	0.220345	-0.252469	0.0221286
KEGG_BIOSYNTHESIS_OF_UNSATURATED_FATTY_ACIDS	0.15909	0.127183	-0.201453	-0.133688	0.0267548	-0.0247547	-0.0940033	0.0847408	0.259953	0.153322	-0.197994	-0.148203	-0.524343	0.20382	0.316701	-0.0137231	-0.0362369	0.306303	0.0495095	0.0083031	-0.0651184	0.128597	-0.122804	-0.453573	0.279165	0.0406763	0.276629	-0.076325	-0.00488061	-0.200212	0.026694	0.140807	0.202058	0.176919	-0.476947	-0.428083	-0.264807	-0.0336297	0.349091	0.0498684	-0.201201	-0.191848	0.491493	-0.137555	0.296967	0.111937	0.190302	-0.344542	0.104334
KEGG_ABC_TRANSPORTERS	-0.0450473	0.106618	-0.207629	0.0130365	-0.0680436	-0.163338	0.0337882	0.0730842	0.00814892	-0.0518123	-0.26935	-0.279329	0.340005	0.120125	0.289639	0.129716	-0.142512	0.102102	0.39877	0.307012	0.157197	0.141456	0.0543933	-0.124447	-0.476499	0.0852398	0.102466	-0.111827	0.280482	-0.262469	-0.127404	-0.118957	-0.187546	-0.222776	0.398239	0.217139	-0.0329054	0.105394	-0.254287	0.0956668	0.0133138	0.284503	-0.10558	0.0819326	-0.202852	0.176163	-0.0121275	0.287959	0.0797056
KEGG_RIBOSOME	0.61699	0.587306	0.112573	-0.531161	0.78535	0.0080317	0.138057	0.1519	0.823706	0.584269	-0.349348	0.823733	-0.830105	0.579951	-0.60264	-0.855552	0.514914	0.0582248	-0.798936	-0.209463	0.457043	0.287763	0.641686	0.136629	0.587153	0.732778	-0.0267675	-0.48462	0.55927	0.21162	-0.674551	-0.380905	0.551962	-0.10213	-0.736564	0.834544	-0.715234	0.424162	0.746329	0.111679	-0.818624	-0.717051	0.0669531	-0.1081	0.870884	0.328696	0.621418	-0.375069	-0.412581
KEGG_RNA_DEGRADATION	-0.0079133	-0.104326	0.318296	0.251639	-0.0258911	0.0884493	0.0753362	0.290056	0.121421	0.239138	0.338064	0.30139	-0.345005	0.0914731	-0.203606	-0.260671	0.0877157	0.129463	-0.278497	0.0288494	0.145078	-0.258254	-0.246686	0.0745173	0.515807	0.196652	-0.0815945	-0.148482	-0.397206	0.271503	0.308992	-0.10263	-0.16712	0.417821	-0.281933	-0.307492	0.418815	-0.132959	0.135162	-0.121282	-0.240202	-0.248278	0.115708	-0.39671	0.372113	-0.400603	-0.0661477	0.0386528	0.0932454
KEGG_RNA_POLYMERASE	0.202754	0.155416	0.518956	0.114825	0.0758237	0.306953	0.198683	0.287963	0.42715	0.342382	0.280216	0.43131	-0.621886	0.0996826	-0.464183	-0.685863	0.411367	0.415107	-0.427491	0.0948213	0.0120835	0.0415253	-0.471096	0.216184	0.636504	0.181461	-0.014908	-0.308562	-0.480206	0.453291	0.0590661	0.0805495	0.00367236	0.382878	-0.550022	-0.113344	0.150607	-0.42166	0.416578	0.0646986	-0.468233	-0.563823	0.0389918	-0.366511	0.597148	-0.522159	0.320034	-0.286895	0.145976
KEGG_DNA_REPLICATION	-0.43211	-0.557462	-0.197925	0.373915	-0.294455	0.523558	0.0104915	0.452001	-0.252289	-0.418893	0.611743	-0.440406	-0.103742	-0.541613	-0.561656	0.112743	-0.711588	-0.209695	-0.510212	0.548458	-0.185898	-0.519422	-0.385486	-0.261607	0.685677	-0.485462	0.383741	-0.127458	-0.476691	0.426111	0.591317	-0.484087	-0.156153	0.517093	-0.335452	-0.708534	0.326376	-0.491028	0.566178	-0.191747	0.318629	-0.441269	0.18215	-0.573251	0.485703	-0.574412	0.0994726	-0.585374	-0.187666
KEGG_SPLICEOSOME	0.095087	-0.255293	0.293193	0.319017	-0.212589	0.098551	-0.19874	0.430499	-0.228973	0.254485	0.409437	0.242662	-0.327675	-0.205332	-0.317288	-0.371785	0.0612477	0.18814	-0.468482	0.311797	0.0907206	-0.216954	-0.208824	0.1563	0.585187	0.120365	0.198092	0.014576	-0.323475	0.338544	0.366976	0.148845	-0.0849652	0.168589	-0.331142	-0.387595	0.513721	0.0849439	-0.116605	-0.128823	-0.0543533	-0.482802	0.0246857	-0.287331	0.330341	-0.475032	-0.336811	-0.120388	0.034378
KEGG_PROTEASOME	-0.421567	0.353583	0.297524	0.575835	0.0736955	0.387563	-0.0895058	0.576858	0.314486	-0.222489	0.425434	-0.087215	-0.438445	-0.0847771	0.102658	-0.456625	0.262021	0.211066	-0.472149	0.217137	-0.0579976	0.000721664	-0.303436	0.0830332	0.464179	-0.422809	0.372778	-0.211573	-0.590527	0.658086	0.0655555	-0.166085	-0.166449	0.531526	-0.151066	-0.593255	0.337504	-0.379239	0.528128	0.176224	0.21185	-0.630858	0.457789	-0.742423	0.588836	-0.630947	0.491461	-0.647316	-0.190779
KEGG_PROTEIN_EXPORT	-0.285084	0.0934493	0.381158	0.149171	0.409629	0.012791	0.0108429	0.455002	0.295332	-0.0514232	0.226576	0.562674	-0.46928	0.397917	-0.0757762	-0.340868	0.514056	0.150509	-0.496255	-0.250254	0.508979	0.114727	0.638786	0.528138	0.0928889	-0.236944	-0.473962	0.176493	-0.418856	0.446995	0.0460847	0.233097	-0.340508	0.33537	0.298235	0.10342	0.445255	0.442431	0.361865	0.040535	-0.18332	-0.529895	0.592311	-0.531428	0.697674	-0.40528	0.350264	-0.450915	-0.262627
KEGG_PPAR_SIGNALING_PATHWAY	-0.131024	0.254072	0.0529732	-0.0990041	0.405079	-0.21814	-0.130724	-0.15244	0.380964	0.0400991	-0.367137	0.0595155	-0.246534	0.361754	0.291663	0.0344455	0.173308	0.0246043	-0.0207693	-0.222687	0.163912	-0.0418713	-0.146557	-0.191816	-0.254434	0.344501	-0.178766	-0.0896477	0.127598	-0.39839	-0.244185	0.109332	-0.202877	-0.00263945	-0.205321	0.220919	-0.203478	-0.116311	0.164185	0.183176	-0.272798	-0.100174	0.174553	0.0907881	-0.0666764	0.381466	0.357155	0.153496	-0.166129
KEGG_BASE_EXCISION_REPAIR	-0.0533992	-0.350949	0.287883	0.100185	-0.213885	0.164454	0.22859	0.321217	-0.00444674	-0.04261	0.274981	-0.0639198	-0.198475	-0.467567	-0.240092	-0.375711	-0.380027	-0.0921684	-0.432777	0.476993	-0.356164	-0.231612	-0.264463	0.0124294	0.490446	0.0627144	0.328258	-0.263297	-0.533543	0.247373	0.310112	-0.296822	-0.144407	0.554756	-0.33705	-0.542878	0.315859	-0.203323	0.395522	0.048017	0.203611	-0.590385	0.193873	-0.527987	0.434544	-0.436819	0.0518089	-0.448308	0.139676
KEGG_NUCLEOTIDE_EXCISION_REPAIR	-0.357425	-0.243215	-0.0993854	0.278701	-0.0179743	0.265572	-0.100273	0.179381	0.103749	-0.0591985	0.202888	-0.138495	-0.299999	-0.207445	-0.40209	0.0266954	-0.202083	-0.22329	-0.373987	0.30361	-0.217307	-0.44424	-0.442029	0.0234263	0.486808	-0.267512	0.207738	-0.079116	-0.476522	0.399591	0.416439	-0.146651	-0.163021	0.477	-0.399597	-0.476571	0.436451	-0.351103	0.253288	0.0623477	0.263432	-0.215798	-0.0452059	-0.167015	0.353964	-0.460675	0.0595104	-0.352347	0.113735
KEGG_MISMATCH_REPAIR	-0.459089	-0.421754	-0.063204	0.436286	-0.230443	0.493804	-0.248251	0.295165	-0.272383	-0.286338	0.523482	-0.259424	-0.315646	-0.403175	-0.45802	0.152195	-0.511281	-0.312066	-0.384623	0.346322	-0.200707	-0.428028	-0.459403	-0.268431	0.62746	-0.559515	0.350686	-0.00605445	-0.496628	0.419229	0.505256	-0.231152	-0.207628	0.474998	-0.438354	-0.588824	0.413568	-0.468773	0.452376	-0.125477	0.377396	-0.287918	0.0808204	-0.424679	0.395298	-0.504162	-0.0733691	-0.559677	0.00145614
KEGG_HOMOLOGOUS_RECOMBINATION	-0.161595	-0.308464	-0.275519	0.314581	-0.143456	0.525637	-0.321789	0.473659	-0.310454	-0.266539	0.461515	-0.46184	-0.0779608	-0.5169	-0.440169	0.187757	-0.579803	-0.118556	-0.463728	0.428189	-0.439625	-0.440498	-0.486349	-0.072105	0.587264	-0.550591	0.442342	-0.379134	-0.562049	0.299412	0.361679	-0.377997	0.0210289	0.393348	-0.167438	-0.651277	0.4231	-0.276666	0.279036	-0.125089	0.188317	-0.048769	-0.128113	-0.436879	0.473448	-0.413917	0.0981876	-0.469396	-0.0543617
KEGG_MAPK_SIGNALING_PATHWAY	-0.0313165	0.101148	-0.151686	-0.0241168	-0.157454	0.0646379	-0.000451217	-0.194661	0.156	-0.0790859	0.0113047	0.0792721	0.0653948	-0.00481512	-0.0389558	0.072995	-0.0773602	-0.105702	-0.0294335	-0.17442	-0.00992411	0.13688	-0.136135	-0.0171274	-0.216339	-0.108642	0.0603434	0.177865	0.330952	0.0392774	-0.0727966	0.127861	-0.14979	-0.19227	-0.0569367	0.0430701	-0.0827124	-0.0323809	-0.0229405	-0.0514838	0.126854	0.0160113	-0.096012	0.0885655	-0.187949	0.0728533	-0.0686982	0.11968	-0.0871177
KEGG_ERBB_SIGNALING_PATHWAY	-0.0948643	-0.341395	-0.116073	0.0343542	-0.292172	0.218217	-0.166799	-0.0336286	-0.227954	-0.0534837	0.0260955	0.255542	0.171236	-0.00594306	0.068323	0.107052	-0.15645	-0.034064	-0.323147	-0.117387	0.144999	0.145222	-0.226314	-0.0687402	-0.126087	-0.287217	0.0953371	0.298845	0.259135	0.0133423	-0.0323599	0.264665	-0.00530097	0.0137745	-0.186295	-0.0243481	0.243436	-0.125137	-0.08863	0.209257	-0.0292431	0.0514719	0.014696	0.0286319	-0.424558	-0.0234759	-0.360468	0.190122	0.0694565
KEGG_CALCIUM_SIGNALING_PATHWAY	0.0532776	0.0523963	-0.24591	-0.0515951	0.0340492	0.136688	0.214418	-0.14318	0.0591483	-0.160992	0.0755173	-0.193353	0.126501	-0.0387742	0.0566471	0.185719	-0.00912948	-0.163939	0.31537	-0.133932	-0.142742	-0.0740383	0.297999	0.0800525	-0.197761	-0.184474	-0.0937454	-0.0566432	0.367491	-0.0499562	0.0917759	-0.10676	-0.054827	-0.120089	0.300307	0.197717	-0.302462	0.00104501	-0.107075	-0.101866	-0.0688653	0.337479	0.0730651	0.216636	-0.184343	0.201018	0.0828907	0.224067	-0.189867
KEGG_CYTOKINE_CYTOKINE_RECEPTOR_INTERACTION	-0.238705	0.303654	-0.401401	0.178373	0.210449	0.294446	-0.239328	-0.298518	0.342352	-0.418991	0.170828	-0.27404	0.346577	-0.204504	-0.118822	0.117174	-0.258212	-0.305746	-0.263197	-0.3382	-0.0510724	0.13528	-0.0291008	-0.111546	-0.376503	-0.00636526	-0.164212	0.00269651	0.473474	0.107754	-0.278535	-0.260746	-0.267138	-0.331829	0.383189	0.395747	-0.377438	-0.268665	0.242873	0.139595	0.044387	0.0422999	-0.109404	-0.0809945	0.144523	0.00128492	0.456981	-0.0339326	-0.363351
KEGG_CHEMOKINE_SIGNALING_PATHWAY	-0.212716	0.0801355	-0.385314	0.0566436	-0.094739	0.278132	-0.300485	-0.332573	0.0288874	-0.365205	0.194138	-0.126091	0.356628	-0.127365	-0.092071	0.0821704	-0.102298	-0.301936	-0.318166	-0.268372	0.144134	0.165334	-0.192352	0.0612568	-0.164857	-0.1651	0.0577168	0.0854208	0.435422	0.0436515	-0.00833637	0.0212215	-0.268209	-0.170633	0.202577	0.294325	-0.194531	-0.298503	0.156518	0.0527433	0.0562587	-0.0178733	-0.214303	-0.0956462	-0.0685998	0.00710023	0.237133	0.0906124	-0.381983
KEGG_PHOSPHATIDYLINOSITOL_SIGNALING_SYSTEM	-0.0843186	-0.360129	-0.348293	-0.0219408	-0.326455	0.0593778	-0.0466431	-0.263173	-0.308724	-0.0278544	0.0691404	-0.121419	0.404307	0.00976267	0.124037	0.289775	-0.0611306	0.0543157	0.273941	0.212942	0.134568	0.0724941	-0.0769685	-0.00519126	-0.214454	-0.107126	-0.0652757	-0.0225639	0.293039	-0.191606	0.115654	0.167364	-0.226086	-0.238554	0.118113	-0.0050965	-0.145835	0.0110103	-0.374447	-0.00654242	0.1036	0.239438	-0.157778	0.237696	-0.452504	0.290447	-0.424747	0.304048	-0.24173
KEGG_NEUROACTIVE_LIGAND_RECEPTOR_INTERACTION	0.0914777	0.208304	-0.250026	-0.0497683	0.369372	0.184483	0.197809	-0.111289	0.205096	-0.0893446	0.0541036	-0.211154	0.216952	0.0120859	0.192219	0.0839135	0.0653693	-0.13332	0.357147	-0.0329709	-0.117516	-0.000784029	0.378542	0.0448348	-0.067689	-0.112565	-0.176239	-0.173393	0.424155	-0.0921176	0.0687521	-0.253627	-0.0639373	-0.169822	0.364002	0.259531	-0.343376	0.072438	0.10644	-0.157249	-0.170547	0.341964	0.153826	0.23717	0.125524	0.232845	0.435337	0.122673	-0.379027
KEGG_CELL_CYCLE	-0.261867	-0.473802	-0.177188	0.37705	-0.357084	0.471652	0.0715957	0.372208	-0.264004	-0.324858	0.439245	-0.138972	-0.0528581	-0.385562	-0.398428	0.129238	-0.395352	0.189816	-0.31399	0.296586	0.119353	-0.290014	-0.127907	0.220847	0.464661	-0.356043	0.0656382	0.0892749	-0.285529	0.439781	0.461252	-0.314417	-0.0669246	0.184013	-0.109309	-0.487797	0.364588	-0.389053	0.315981	-0.0662514	0.0750297	-0.195942	0.214692	-0.415582	0.351963	-0.440142	-0.0142164	-0.415723	0.0136061
KEGG_OOCYTE_MEIOSIS	-0.166088	-0.209457	-0.116224	0.0662214	-0.246538	0.28854	0.149858	0.138259	-0.00515456	-0.33109	0.298399	-0.117546	-0.000188654	-0.0763924	-0.123268	0.0891657	-0.10749	0.183284	-0.0229294	0.152096	0.164577	-0.297791	-0.0725523	0.245477	0.306	-0.31466	0.136983	0.190526	-0.131355	0.284938	0.381378	-0.159082	-0.116943	0.230446	-0.0462296	-0.320838	0.175077	-0.183818	0.329835	-0.0195737	-0.00529134	-0.0809701	0.0841544	-0.190943	0.181609	-0.132646	-0.0808258	-0.0580837	-0.119813
KEGG_P53_SIGNALING_PATHWAY	0.0146493	0.0630128	-0.161473	0.326992	-0.190968	0.156125	-0.179274	0.198721	0.103203	-0.0802991	0.295609	0.0967735	-0.127266	-0.194848	-0.21611	0.215898	-0.218118	-0.236781	-0.226484	0.0419815	0.0758477	0.162978	-0.132825	-0.0473839	-0.0189796	-0.00326283	-0.0592231	0.00400958	0.0921932	0.424283	0.138896	-0.355716	-0.0393002	0.0927219	-0.0630443	-0.341258	0.0817695	-0.321698	0.154833	0.021745	0.10116	-0.0163354	0.21139	-0.258438	0.241378	-0.258586	0.205702	-0.344258	0.130119
KEGG_UBIQUITIN_MEDIATED_PROTEOLYSIS	-0.160524	-0.344663	0.0716429	0.26499	-0.359387	0.048863	-0.221949	0.132404	-0.161176	0.138333	0.20092	0.232208	0.0197603	-0.0817921	0.125456	0.186995	-0.042747	0.118503	-0.435862	-0.0752538	0.063856	0.0749489	-0.4036	0.230483	0.14403	-0.195042	-0.00303644	0.109102	-0.226854	0.210622	0.201884	0.154072	-0.116734	0.244538	-0.00472341	-0.275059	0.390301	-0.0590975	-0.0850106	0.141898	0.0354335	0.0350677	0.182217	-0.122195	-0.113261	-0.231656	-0.249641	0.0774865	0.153268
KEGG_REGULATION_OF_AUTOPHAGY	-0.120837	-0.14326	-0.0625123	0.260592	0.23531	0.00446547	-0.0249542	0.338194	0.29269	0.201189	0.321611	0.0457624	0.207935	0.18801	0.240321	0.0984095	-0.106244	0.12301	0.0619408	-0.0462024	0.344613	0.199398	0.0451011	0.169884	-0.231321	-0.113382	0.117262	-0.0171296	-0.242185	0.122568	-0.139853	-0.14612	-0.43486	0.224189	0.121613	0.198176	0.198591	-0.251585	-0.0274487	-0.177473	-0.114655	0.064457	0.225768	-0.146635	0.0709928	0.212893	0.430255	0.216887	-0.141031
KEGG_ENDOCYTOSIS	-0.0725726	-0.0013027	-0.27877	0.0605816	-0.216481	-0.043305	-0.23088	-0.235907	-0.120912	-0.0456143	-0.056195	0.117741	0.149653	0.065776	0.209857	-0.0501598	-0.0341729	-0.116549	-0.295993	-0.167467	0.000537991	0.0681987	-0.250618	-0.0550386	-0.0735203	-0.219385	0.135498	0.183049	0.0891779	0.141428	-0.151721	0.272175	-0.148368	-0.103477	-0.171453	-0.18426	0.0808313	-0.146877	-0.106884	0.108967	0.152791	-0.134472	-0.195623	0.099277	-0.345052	0.191974	-0.29228	0.183057	0.0135572
KEGG_PEROXISOME	-0.157133	0.301497	0.36474	-0.249356	0.338321	-0.488345	-0.0749782	-0.0559594	0.363161	0.108461	-0.451143	-0.0118016	-0.22831	0.3979	0.346387	-0.246143	-0.0485397	-0.122109	0.142903	0.162392	0.157187	-0.142948	-0.403482	-0.150115	-0.0189625	0.0133848	-0.0578405	-0.194562	-0.301813	-0.490841	-0.299501	0.328191	-0.0395857	0.324597	-0.297909	-0.116813	-0.0388678	-0.336739	0.275818	0.318568	-0.256211	-0.246299	-0.0609285	0.0923712	-0.0898271	0.130882	0.266595	0.0444196	-0.242737
KEGG_MTOR_SIGNALING_PATHWAY	0.0484772	-0.143134	-0.358107	-0.136297	-0.313591	-0.156195	-0.277823	-0.00976189	-0.111338	0.105323	0.12739	0.0916516	0.0852504	-0.233484	-0.240731	0.0903462	-0.17268	0.202126	-0.200611	-0.0349437	0.0149281	0.10966	-0.163262	0.0441202	-0.0885851	-0.208817	0.238983	0.322491	0.0404631	-0.0426883	0.155124	0.235467	-0.00971974	0.0413146	-0.14116	-0.0629891	-0.0697768	0.0238455	-0.0454721	0.141364	0.041683	0.0985152	-0.124438	-0.0710033	-0.220756	0.00800282	-0.256819	0.171868	0.249812
KEGG_APOPTOSIS	-0.156983	-0.0202598	-0.171929	-0.0634745	-0.246025	0.0275553	-0.129373	-0.0798356	0.159857	0.07223	0.280479	0.105512	0.151137	-0.027308	-0.0634115	0.139244	-0.0012	-0.181515	-0.341296	-0.233608	-0.0193891	0.303139	-0.351881	-0.0540654	-0.315767	-0.172221	-0.0597816	0.110729	0.22719	0.251683	-0.320661	-0.0659551	-0.297332	0.0149467	-0.125727	0.10902	-0.0964735	-0.133987	0.164302	0.20968	0.123405	-0.0787615	-0.107945	-0.205228	-0.0814284	-0.000296254	0.0889649	-0.0987004	-0.092847
KEGG_VASCULAR_SMOOTH_MUSCLE_CONTRACTION	0.0843076	-0.036793	-0.413231	-0.253798	-0.222861	-0.0721461	0.121723	-0.388805	0.0183178	-0.306899	0.0490586	-0.157034	-0.0937957	-0.00796321	0.106293	0.126588	-0.0107477	-0.0380248	0.127041	-0.156193	-0.0631271	0.0573034	0.21247	0.0731533	-0.165982	-0.196531	-0.234742	0.150284	0.404625	0.0285918	-0.113208	0.335471	0.0635767	-0.189105	0.0175986	-0.0533957	-0.342934	0.227198	-0.0755875	0.0548438	0.0171619	0.298767	0.0130949	0.26082	-0.255858	0.120219	-0.150687	0.429272	-0.179521
KEGG_WNT_SIGNALING_PATHWAY	-0.0141873	-0.212609	0.187472	-0.0506705	-0.257459	0.0602346	0.221256	-0.209314	-0.112172	0.138003	0.120566	0.174266	-0.0729847	0.291539	0.124571	0.0586537	0.192335	0.25181	0.062494	-0.160086	0.144553	-0.235068	0.0254815	0.197622	0.0147704	-0.0123434	0.0566187	0.186924	0.22399	0.208394	-0.0665332	0.355383	0.0463698	-0.158406	-0.0860878	0.113755	0.11681	0.193411	-0.151123	-0.0245614	0.0418087	0.152861	0.119741	0.210213	-0.176843	-0.00902603	-0.329427	0.272402	-0.0833634
KEGG_DORSO_VENTRAL_AXIS_FORMATION	0.0217418	-0.428221	-0.290892	0.119359	-0.246589	0.325049	-0.323035	-0.219524	-0.0630061	-0.288927	0.362273	-0.369337	0.324224	-0.168243	0.330548	0.192323	-0.271388	-0.156554	-0.370796	-0.257471	0.0376352	0.0208438	-0.201965	0.0341492	-0.0205497	-0.301785	0.0480389	0.39957	0.443828	0.41808	0.00669255	-0.0501285	0.131143	0.0494934	0.108077	0.0636365	0.198523	0.0386805	-0.329547	0.0746303	0.0575256	0.0769141	-0.281032	-0.0309442	-0.623492	0.1283	-0.504076	0.357211	-0.0285103
KEGG_NOTCH_SIGNALING_PATHWAY	0.229509	-0.441513	0.241954	0.0988534	-0.263732	0.0274838	0.0206997	0.162443	-0.363357	0.173961	-0.229837	-0.177047	0.225034	0.0830612	-0.115543	-0.389578	0.300372	0.250391	0.0029775	-0.0642429	-0.000201411	0.0112555	-0.097856	0.322637	0.193289	0.0274606	0.41564	0.33839	-0.261837	0.144255	0.00636079	0.00489962	0.145206	-0.0386406	-0.211226	0.0726638	0.268121	0.188923	-0.430117	0.351848	0.209337	-0.33947	-0.317974	0.0235406	-0.319464	-0.00585806	-0.48166	0.185585	0.17419
KEGG_HEDGEHOG_SIGNALING_PATHWAY	0.0603729	0.022113	-0.0834694	-0.303755	-0.293067	0.127344	0.305656	-0.290645	-0.0747806	-0.0526443	-0.0260841	0.121437	0.306891	-0.20354	0.227728	0.0875155	-0.14863	0.304049	0.31455	-0.128552	0.0654911	-0.0852564	0.433938	0.114242	-0.126856	-0.0834481	-0.11145	0.129094	0.445342	0.163782	-0.0542512	0.195699	-0.178495	-0.448836	0.206554	0.100725	0.00846831	0.380979	-0.309102	-0.0639386	0.145391	0.158399	0.143327	0.443419	-0.22363	0.23865	-0.222128	0.317393	0.0337433
KEGG_TGF_BETA_SIGNALING_PATHWAY	0.0576375	-0.0889711	-0.138176	0.0475857	-0.383335	0.163371	-0.00186081	-0.333069	-0.0797456	-0.148483	0.0683112	-0.0133494	-0.200342	-0.150874	0.0243192	0.204966	-0.0902617	0.297615	-0.231246	-0.408684	0.0250172	-0.0911748	0.235642	0.235659	-0.0879951	-0.212597	-0.0420107	0.282857	0.251987	0.267476	-0.0390392	0.27469	0.0603213	-0.323397	0.186614	-0.0182212	0.0494317	0.184782	-0.0254463	-0.0347392	0.12483	0.191026	0.16165	0.145131	-0.107377	-0.118589	-0.137793	0.186136	-0.00279675
KEGG_AXON_GUIDANCE	-0.198465	-0.218042	-0.0359377	-0.149524	-0.344917	0.0161969	-0.0048261	-0.206096	-0.245799	0.00629796	0.0684318	-0.030488	0.0504065	-0.00319745	0.355377	-0.0126138	0.00422925	0.0151469	-0.189341	-0.250924	0.00167038	0.145655	-0.188366	-0.0617214	-0.0892592	-0.223902	0.00361664	0.368417	0.297623	0.341363	-0.0324689	0.302126	0.275395	-0.244634	-0.147271	0.109279	-0.0072055	-0.0922277	-0.217132	0.0474882	0.267461	0.0589379	-0.263088	0.183506	-0.241312	0.149159	-0.306043	0.163985	0.0180044
KEGG_VEGF_SIGNALING_PATHWAY	0.0127501	-0.0743711	-0.148325	-0.0384897	-0.277064	0.0395505	-0.0865468	-0.190633	-0.0956506	-0.0727039	0.0265312	-0.0930881	0.177617	0.0634225	0.0585481	-0.10741	0.0627051	-0.0486702	0.0235831	-0.0611793	-0.0646188	0.0709139	-0.107631	-0.035952	-0.207624	-0.11859	0.170208	0.192683	0.252665	0.0136127	-0.081793	0.277316	-0.19792	0.0273248	-0.0442161	0.0797661	0.0435149	-0.175429	0.129912	-0.144374	0.0180916	0.0396326	-0.15627	-0.281145	-0.260645	0.153743	-0.102716	0.212026	-0.088875
KEGG_FOCAL_ADHESION	-0.0836899	-0.141855	-0.358523	0.0871782	-0.384633	0.303415	-0.222924	-0.264896	-0.0980899	-0.295223	0.24384	-0.126972	0.0851581	-0.180281	-0.0236794	0.29149	-0.169183	-0.0076393	-0.196431	-0.369589	-0.0468628	-0.0504906	0.0958043	0.00166794	-0.215355	-0.26055	-0.0606118	0.483599	0.320559	0.422992	-0.30056	0.346953	0.154097	-0.00886869	-0.0807714	-0.102737	-0.0482129	-0.0852488	-0.0421427	-0.0167015	0.384543	0.210831	0.00146376	-0.0497345	-0.443582	-0.159925	-0.358993	0.277227	0.139049
KEGG_ECM_RECEPTOR_INTERACTION	0.0546663	0.00469756	-0.395327	0.211578	-0.425849	0.314062	-0.182501	-0.302949	-0.0910528	-0.415153	0.32775	-0.228859	0.169666	-0.245881	-0.168967	0.360838	-0.267046	0.0143605	0.126605	-0.431851	-0.143907	-0.0623658	0.343914	-0.165313	-0.370325	-0.170273	-0.133089	0.545226	0.353655	0.469605	-0.27087	0.228197	0.243954	-0.204759	0.111688	-0.0472883	0.000596828	-0.06478	-0.0892586	-0.0217174	0.518826	0.315735	0.0293381	-0.0524615	-0.417939	-0.131896	-0.28869	0.287788	0.40756
KEGG_CELL_ADHESION_MOLECULES_CAMS	-0.459854	0.413892	-0.514402	0.103026	0.117814	0.0786308	-0.335752	-0.488903	0.251427	-0.340266	0.105372	-0.134738	0.449148	-0.0265769	0.035405	0.0188568	-0.245758	-0.500171	-0.139321	-0.402655	-0.0236638	-0.320835	-0.0148961	-0.175348	-0.486117	-0.00264086	-0.183216	0.0542857	0.595232	0.0929774	-0.0124671	-0.115602	-0.317905	-0.214974	0.34691	0.399726	-0.471947	-0.418317	-0.0053204	0.228474	0.211211	0.192763	-0.173608	0.0131501	-0.0255942	-0.0442092	0.368482	0.107228	-0.337467
KEGG_ADHERENS_JUNCTION	-0.134911	-0.263372	-0.271932	0.20999	-0.389349	0.0727856	-0.377919	-0.292497	-0.281107	-0.0407202	0.248455	0.0853467	0.0113359	0.153144	0.315501	0.214743	0.137099	-0.155517	-0.385714	-0.387541	0.0697726	-0.129316	-0.303095	0.0388679	-0.069382	-0.185277	0.178965	0.379099	0.122331	0.339709	-0.116927	0.285332	0.0745449	-0.0576504	-0.146546	-0.120369	0.277331	-0.067264	-0.235061	-0.096673	0.371246	0.145559	-0.0274592	0.219837	-0.376759	-0.0481974	-0.446991	0.257105	0.0922526
KEGG_TIGHT_JUNCTION	-0.0495309	0.119234	0.0237114	0.205316	-0.182025	-0.0174803	0.0247466	-0.092892	-0.0901642	0.0805254	-0.00727285	0.0583547	-0.0558983	0.171903	0.269514	-0.00705263	0.181751	-0.0471452	-0.0294505	-0.128944	-0.048189	-0.229132	-0.0582126	0.000687304	-0.11802	-0.0175445	0.190032	0.293182	0.218375	0.0636058	-0.132449	0.330806	0.155326	-0.0106006	-0.200976	-0.0181558	-0.161525	-0.0578965	-0.139071	-0.0547569	0.123528	0.047759	-0.0250704	0.0956336	-0.233562	0.0259549	-0.240304	0.080089	-0.0657772
KEGG_GAP_JUNCTION	0.114193	-0.200018	-0.140669	0.0859343	-0.347375	0.0946135	-0.113856	-0.0557196	-0.0853168	-0.181886	0.235208	-0.0255228	-0.0376177	-0.12053	0.136827	0.0692481	-0.0426717	-0.094718	-0.0191666	-0.0947938	0.0203272	-0.00638876	0.123827	0.0559942	0.0361326	-0.33718	0.113549	0.301084	0.299039	0.254993	0.0948816	0.246215	0.142583	0.0119029	0.0191309	-0.175984	-0.0983238	0.0519137	-0.142108	0.000599133	0.317705	0.0754742	0.0988348	0.116256	-0.316681	0.0582886	-0.239698	0.0864298	-0.00129724
KEGG_COMPLEMENT_AND_COAGULATION_CASCADES	0.11403	0.382689	-0.24065	-0.0426681	0.333448	-0.10932	0.26492	-0.0199222	0.323496	-0.0629401	-0.251533	-0.0110998	-0.21075	0.295519	0.341703	-0.120505	0.221293	-0.0931695	0.292322	-0.241143	0.148826	0.0501209	0.415329	0.000191765	-0.493547	0.203705	-0.221049	-0.0958579	0.514235	-0.129591	-0.457402	-0.152347	-0.257987	-0.336168	0.527623	0.407963	-0.329978	0.286007	0.134635	0.115102	-0.0776587	-0.0895272	-0.0999376	0.0601766	-0.131707	0.395722	0.578015	0.336196	-0.235623
KEGG_ANTIGEN_PROCESSING_AND_PRESENTATION	-0.486203	0.395388	-0.299156	0.345883	0.240744	0.403661	-0.323549	-0.378978	0.440916	-0.30592	-0.127836	-0.0600595	0.608158	0.205781	-0.0218839	-0.261999	-0.26767	-0.582654	-0.419914	-0.307424	0.282344	-0.324796	-0.391399	0.013503	-0.447464	0.351911	-0.149421	0.00149685	0.461243	0.245743	-0.0754169	-0.463663	-0.444495	0.147153	0.226917	0.480507	-0.056327	-0.423077	0.00823437	0.264542	-0.296086	-0.327241	-0.133693	-0.410167	0.261603	-0.198201	0.446849	-0.0671446	-0.392482
KEGG_TOLL_LIKE_RECEPTOR_SIGNALING_PATHWAY	-0.34373	0.0834121	-0.323145	0.0508001	-0.0102702	0.213112	-0.418487	-0.270316	0.306146	-0.350113	0.173506	-0.0449285	0.370454	-0.149863	-0.12303	0.216372	-0.32955	-0.321663	-0.420849	-0.319117	0.122871	0.124502	-0.413531	-0.144132	-0.304832	-0.0948689	0.0910256	0.181765	0.392556	0.306883	-0.144971	-0.215015	-0.442364	0.00970621	0.156293	0.146339	-0.0737277	-0.374987	-0.0216474	0.212293	0.203395	-0.0213959	-0.201494	-0.253121	-0.134847	-0.0200285	0.272485	-0.0587423	-0.174803
KEGG_NOD_LIKE_RECEPTOR_SIGNALING_PATHWAY	-0.376408	0.275579	-0.351726	0.283601	0.0171336	0.200121	-0.3581	-0.266571	0.194181	-0.332718	0.274406	-0.0714477	0.327268	-0.143172	-0.292388	0.0694453	-0.374888	-0.397232	-0.482861	-0.340519	0.140003	0.23805	-0.366645	0.105706	-0.243165	-0.0215716	-0.0827465	0.0110525	0.279403	0.359828	-0.165725	-0.269494	-0.401026	0.0655502	0.0405925	0.145281	0.128051	-0.368105	0.176449	0.0115112	0.33918	-0.212664	-0.166118	-0.194685	0.0205426	-0.0658678	0.358567	-0.0202142	-0.140883
KEGG_RIG_I_LIKE_RECEPTOR_SIGNALING_PATHWAY	-0.0966455	-0.0463561	-0.0147169	-0.0190639	0.0862515	0.0857071	-0.26215	-0.067914	0.135049	0.085357	-0.0274958	-0.0329579	0.351367	-0.0431069	-0.135068	0.191992	-0.112823	0.0299166	-0.288058	-0.259017	0.109521	0.29701	-0.43886	0.0197732	-0.303147	0.0776048	0.244168	-0.0415635	-0.0316982	0.363319	-0.192512	-0.041238	-0.0525001	0.0653058	0.116028	0.0092225	0.284301	-0.0964713	0.00898325	0.155552	0.174482	0.0605954	-0.158353	-0.302072	-0.0681816	0.0427434	0.179026	0.048297	-0.0133039
KEGG_CYTOSOLIC_DNA_SENSING_PATHWAY	-0.277428	0.205647	-0.0152813	0.216221	0.25657	0.371405	-0.0955127	0.0957649	0.202528	-0.0695253	0.222855	0.00222724	0.105379	-0.0197172	-0.355894	-0.18369	0.140933	-0.181376	-0.368052	-0.157487	0.140306	0.273294	-0.405935	0.192285	-0.0488511	0.327057	0.216737	-0.170902	0.0771721	0.487385	-0.0125856	-0.300377	-0.195969	-0.0206465	0.230261	0.200514	0.0460739	-0.196705	-0.0315889	-0.0243604	0.0509424	-0.290375	-0.131089	-0.432079	0.269746	-0.036242	0.420557	-0.297642	-0.127406
KEGG_JAK_STAT_SIGNALING_PATHWAY	-0.224752	-0.100145	-0.342819	0.176629	0.00139676	0.0959743	-0.307285	-0.317321	0.123109	-0.233298	0.13501	-0.0987542	0.361172	-0.201708	-0.138857	0.196624	-0.226204	-0.295315	-0.273024	-0.241976	-0.0403182	0.123046	-0.267657	-0.110053	-0.40311	-0.0649205	-0.0883184	-0.0357443	0.417402	-0.0699928	-0.173073	-0.254611	-0.315048	-0.291481	0.2326	0.215933	-0.0876161	-0.20925	-0.0312437	0.202186	0.0492054	0.283844	-0.038869	-0.0626615	-0.0760819	-0.0226122	0.185101	0.106515	-0.28483
KEGG_HEMATOPOIETIC_CELL_LINEAGE	-0.302217	0.390062	-0.551114	-0.0790074	0.400251	0.317791	-0.0826346	-0.461424	0.38726	-0.458146	0.13839	-0.223196	0.42177	-0.118099	-0.29355	0.000696438	-0.131806	-0.547256	-0.239978	-0.26412	-0.170285	0.128463	-0.045566	-0.115147	-0.471076	0.0640333	-0.345117	-0.163639	0.532323	-0.165613	-0.23555	-0.29997	-0.370974	-0.356379	0.469037	0.440502	-0.455492	-0.472025	0.305205	0.122731	-0.117764	0.0704121	-0.382945	-0.111099	0.0150447	0.0992013	0.501218	0.193197	-0.382358
KEGG_NATURAL_KILLER_CELL_MEDIATED_CYTOTOXICITY	-0.383907	0.146761	-0.474769	0.286873	-0.00312072	0.365619	-0.454761	-0.264642	0.175077	-0.251313	0.255791	-0.147754	0.48803	-0.197233	0.0414959	0.0846142	-0.233457	-0.431393	-0.398466	-0.313197	-0.0173628	0.204137	-0.329875	0.00989417	-0.420948	-0.123548	0.0583042	-0.0153533	0.431644	0.206772	-0.0302379	-0.123842	-0.360498	-0.120079	0.255312	0.326347	-0.0839568	-0.392897	0.156916	0.205018	-0.182022	0.0169432	-0.250082	-0.30986	-0.0639114	-0.115682	0.337073	-0.0773622	-0.244063
KEGG_T_CELL_RECEPTOR_SIGNALING_PATHWAY	-0.414206	-0.143161	-0.273364	0.195971	-0.306613	0.195427	-0.38043	-0.286859	0.118808	-0.306261	0.150095	0.0612137	0.405289	-0.150824	-0.198801	0.17463	-0.312023	-0.373133	-0.378127	-0.280299	0.115568	0.390845	-0.348667	0.228026	-0.341943	-0.18616	-0.0331356	0.0119167	0.458495	-0.0594905	0.136275	-0.0111951	-0.411064	-0.176587	0.197328	0.287546	-0.168507	-0.365961	0.000812182	0.266385	-0.00556866	0.138576	-0.309526	-0.267302	-0.253549	-0.0790859	0.0938726	0.204278	-0.301982
KEGG_B_CELL_RECEPTOR_SIGNALING_PATHWAY	-0.350384	0.0376164	-0.314756	-0.0268241	-0.265343	0.288626	-0.20145	-0.339101	-0.0579269	-0.296017	0.181347	0.106752	0.356545	-0.182306	-0.00153012	0.19134	-0.0101011	-0.317052	-0.265966	-0.263695	0.0480089	0.0908785	-0.217796	0.19569	-0.296859	-0.249991	0.143108	0.166375	0.545176	-0.0253105	0.0344868	0.0671183	-0.246068	-0.136245	0.169406	0.30583	-0.184595	-0.318979	-0.109682	0.0694968	0.214015	0.111755	-0.285339	-0.0758748	-0.325839	0.0453802	-0.0204337	-0.0132953	-0.233358
KEGG_FC_EPSILON_RI_SIGNALING_PATHWAY	-0.154554	0.0670702	-0.423258	-0.178986	-0.00359716	0.0548454	-0.174655	-0.320756	0.06475	-0.187477	-0.0697962	0.0197714	0.288305	-0.158376	-0.116754	0.140232	-0.231776	-0.282536	-0.064338	-0.125954	0.0538599	0.186518	-0.0923736	0.0960216	-0.167377	-0.119832	0.0437896	0.0763641	0.368308	-0.274403	0.0795962	0.0621363	-0.399574	-0.0405493	0.183904	0.175144	-0.138219	-0.230377	-0.059728	0.161171	-0.0677962	0.1799	-0.176699	-0.00481921	-0.155359	0.174579	0.0581863	0.313366	-0.123127
KEGG_FC_GAMMA_R_MEDIATED_PHAGOCYTOSIS	-0.307486	-0.0555684	-0.409699	0.131465	-0.344381	0.280946	-0.313732	-0.208152	-0.265285	-0.266416	0.153315	-0.0223239	0.27037	-0.304416	0.0924715	0.0713221	-0.283368	-0.198594	-0.34426	-0.0522993	-0.128661	0.307798	-0.171578	-0.00333209	-0.216538	-0.282362	0.0750429	0.297439	0.332183	0.0911878	0.150923	0.0840974	-0.204123	-0.0891743	0.0589033	0.00462947	-0.133121	-0.231091	-0.11922	-0.0318038	0.125356	-0.0901643	-0.227641	-0.145508	-0.334505	0.0667926	-0.106392	0.012617	-0.0737394
KEGG_LEUKOCYTE_TRANSENDOTHELIAL_MIGRATION	-0.359805	0.179644	-0.390289	0.233842	-0.0556508	0.101814	-0.338203	-0.343693	-0.0465416	-0.242707	0.0306564	-0.160844	0.285239	-0.105946	0.111255	0.121928	-0.109088	-0.300478	-0.200583	-0.366807	-0.109419	-0.122438	-0.0566771	-0.185193	-0.305994	-0.14071	0.0119826	0.24851	0.488943	0.188004	-0.123774	0.109242	-0.15694	-0.131871	0.0674414	0.093699	-0.21011	-0.395046	0.0198073	-0.0546772	0.340051	0.159177	-0.148677	-0.0977249	-0.274286	-0.138018	0.127795	0.0640831	-0.182559
KEGG_INTESTINAL_IMMUNE_NETWORK_FOR_IGA_PRODUCTION	-0.545987	0.496997	-0.607683	0.19469	0.318065	0.398446	-0.392456	-0.581936	0.561962	-0.460955	-0.0524837	-0.141106	0.689941	-0.295207	-0.35146	0.0449182	-0.41335	-0.614076	-0.317182	-0.410728	0.00778132	-0.362291	-0.218004	-0.274477	-0.465302	0.137823	-0.284384	-0.176913	0.6724	-0.323497	0.0396793	-0.411867	-0.535614	-0.268355	0.500799	0.578675	-0.521	-0.632369	0.351406	0.35059	-0.117054	0.254832	-0.414428	-0.222858	0.172654	-0.0750154	0.68077	0.0708334	-0.506655
KEGG_LONG_TERM_POTENTIATION	-0.148075	-0.0987315	-0.0661306	-0.144697	-0.222078	-0.0256714	0.103472	-0.216229	0.13152	-0.111305	0.127585	0.0476375	0.214434	0.0469497	0.306648	0.170941	-0.0226342	0.0424716	-0.0377148	-0.14731	-0.0591441	-0.0822464	0.173473	0.18411	0.0203411	-0.271356	0.0976205	0.041349	0.351677	-0.0317525	0.152038	0.0933415	-0.104287	-0.0592247	-0.00404702	0.0509791	0.0108166	0.0370502	-0.0150934	-0.0963362	-0.245128	0.140086	0.053742	0.0615327	-0.197395	0.183769	-0.0574975	0.315082	-0.242093
KEGG_NEUROTROPHIN_SIGNALING_PATHWAY	-0.143147	-0.0554863	-0.0674864	-0.0246647	-0.283168	0.126572	-0.124788	-0.238112	-0.0845552	-0.0993418	0.0813756	0.175486	0.225208	-0.0444912	0.0705109	0.0719169	-0.131887	-0.165687	-0.201774	-0.19677	0.00934099	0.082444	-0.191485	0.113442	-0.00723986	-0.219987	0.115138	0.28871	0.332425	0.202168	0.0573371	0.205897	-0.181534	-0.188073	-0.161516	-0.0797578	0.0578152	-0.135761	-0.180835	-0.0110346	0.190777	-0.00938684	-0.15955	-0.0180978	-0.277168	0.036368	-0.31831	0.114546	-0.040807
KEGG_LONG_TERM_DEPRESSION	0.0424235	-0.0744086	-0.0733711	-0.0255287	-0.131838	-0.0644732	-0.0843031	-0.139237	0.00778328	-0.128484	-0.0452979	0.112701	0.0155077	0.172996	0.344172	0.0868417	0.143317	-0.103772	0.06259	-0.170606	0.121999	-0.19278	0.124271	0.0464252	0.0430081	-0.239366	-0.0589881	0.176029	0.314757	-0.0931458	-0.0374797	0.144411	-0.193547	-0.10295	0.06011	0.093009	-0.0513989	-0.00939289	0.000595466	-0.0751375	-0.101491	0.0908336	0.00998927	0.12114	-0.213639	0.30845	-0.0338349	0.246313	-0.222401
KEGG_OLFACTORY_TRANSDUCTION	0.295307	0.129352	0.0239368	-0.195829	0.422513	0.25929	0.467605	0.130145	0.273603	-0.21795	-0.246322	-0.130748	0.237636	0.135766	0.153648	0.153568	0.0765612	0.0777456	0.35347	0.324902	-0.143586	0.0481065	0.46411	0.306547	0.180178	-0.113914	0.160875	-0.14195	0.419849	-0.214884	0.0792476	-0.38093	0.0486976	0.00674277	0.368138	0.255816	-0.194597	0.214332	-0.0600048	-0.165648	-0.336034	0.349666	0.381262	0.136086	0.260656	0.0974488	0.530282	0.116312	-0.394098
KEGG_REGULATION_OF_ACTIN_CYTOSKELETON	-0.127483	-0.0680604	-0.382773	0.0844711	-0.250331	0.27603	-0.219915	-0.252679	-0.138698	-0.217209	0.124378	-0.0908329	0.117096	-0.131222	0.146961	0.135332	-0.176549	-0.105517	-0.267694	-0.248287	-0.106001	0.00678906	-0.0889024	-0.0200252	-0.145006	-0.247105	-0.0376831	0.361313	0.327822	0.25782	-0.0108174	0.219636	-0.0926983	0.0283513	-0.108671	-0.0930219	-0.0948693	-0.149423	-0.0406019	0.000292946	0.278166	0.0314123	-0.00548127	-0.0104713	-0.308813	-0.0974853	-0.182696	0.101658	-0.0822973
KEGG_INSULIN_SIGNALING_PATHWAY	0.159583	-0.11848	-0.0832646	-0.0758984	-0.214805	0.0101936	0.0760249	-0.115332	-0.122755	0.0226981	-0.15087	0.0964288	0.158567	0.0193023	-0.02588	0.0393999	0.0198511	0.187803	-0.198429	0.094902	0.0570475	0.317246	-0.068016	0.142994	0.0388984	-0.20623	0.00671125	0.147416	0.0843862	-0.170819	-0.0600045	0.20042	-0.078366	-0.0961524	-0.107662	-0.0483248	0.00543545	0.104415	-0.048213	-0.00444963	-0.157596	0.010882	-0.0175492	-0.0237423	-0.298964	0.15858	-0.258178	0.21558	-0.0518329
KEGG_GNRH_SIGNALING_PATHWAY	0.0935971	-0.0391702	-0.113121	-0.179344	-0.304303	-0.0279012	0.0398655	-0.158708	-0.0412716	-0.0635668	-0.0377781	0.0480786	0.119469	-0.0711333	0.182284	0.0129739	-0.0235169	0.0143223	0.113526	-0.1423	0.0172812	0.107821	0.105566	0.0962504	-0.108641	-0.104597	0.0712603	-0.0171554	0.260482	-0.150902	0.00781514	0.234031	-0.203275	-0.133481	0.096267	-0.0164502	-0.0711161	0.0547697	-0.249381	-0.0426622	-0.0390956	0.0851181	-0.0922559	0.203615	-0.335926	0.270876	-0.170392	0.372356	-0.0280338
KEGG_PROGESTERONE_MEDIATED_OOCYTE_MATURATION	-0.121563	-0.289425	-0.340318	0.113418	-0.287712	0.315465	0.0289712	0.0424637	-0.107502	-0.366225	0.272992	-0.0939446	0.172028	-0.178953	-0.145143	0.14974	-0.257934	0.0444066	-0.0907915	0.170528	0.236763	-0.129357	-0.062164	0.120297	0.276365	-0.389742	0.134882	0.178226	0.0685436	0.197371	0.33604	0.0093597	-0.24456	0.0363785	-0.0708345	-0.277236	0.155951	-0.27381	0.0990858	0.0788771	0.0904796	-0.0100797	0.0120372	-0.138433	-0.00909546	-0.0344316	-0.0862	0.0870421	-0.0290936
KEGG_MELANOGENESIS	-0.0347315	-0.140842	-0.0303461	-0.0982725	-0.334983	-0.0443248	0.281043	-0.301495	-0.113709	-0.0841245	0.0101057	-0.0361592	0.161479	0.095808	0.189342	-0.0124488	-0.0141953	0.0898172	0.13967	-0.0676226	-0.0367581	-0.00816214	0.203313	0.242354	0.0277389	-0.149283	0.0599751	0.334749	0.313436	0.0198077	0.054313	0.330315	0.0125294	-0.211632	0.04763	-0.0048759	-0.0596434	0.209429	-0.171372	-0.215501	0.0152959	0.0659374	0.00371287	0.251443	-0.233166	0.118722	-0.221694	0.211423	-0.190796
KEGG_ADIPOCYTOKINE_SIGNALING_PATHWAY	0.16569	0.00353774	0.0796834	0.0677571	-0.223217	-0.114887	0.141049	0.0667161	-0.00955536	0.00169765	-0.0937036	-0.0552454	0.116465	0.149863	-0.018161	-0.113049	0.07905	0.0896251	0.0702798	0.0662418	0.338385	0.390913	0.0407262	0.234146	-0.033155	-0.264006	-0.0644758	0.151095	0.154298	-0.130445	-0.0846062	0.0509271	-0.233688	-0.0910124	-0.0753612	0.0618738	0.0143161	0.338174	-0.0452394	-0.0711234	0.0807974	-0.0438504	-0.176265	-0.0907801	-0.290405	0.405332	0.071675	0.241357	-0.18956
KEGG_TYPE_II_DIABETES_MELLITUS	-0.0347978	0.00313334	-0.247958	-0.0425831	0.134072	-0.027429	0.00358596	-0.319044	-0.000157936	0.0692777	0.00157737	-0.0777176	0.220227	-0.0350518	0.0923709	0.211479	0.0371159	-0.0174499	0.200557	-0.174808	0.141339	0.16978	0.0169052	0.114827	-0.0962672	0.0439074	-0.0999503	0.171072	0.407324	-0.211304	0.209413	0.0478256	-0.441423	-0.0988031	0.236112	0.196588	-0.214213	0.0207225	-0.211456	0.031211	-0.166094	0.423841	0.17231	0.263512	-0.33363	0.246584	-0.0336013	0.301376	-0.176751
KEGG_TYPE_I_DIABETES_MELLITUS	-0.573119	0.529255	-0.665252	0.255688	0.428355	0.43247	-0.494204	-0.427966	0.543224	-0.433261	0.0203507	-0.260939	0.604505	-0.183458	-0.157012	-0.151514	-0.474925	-0.668506	-0.425446	-0.293522	0.143945	-0.090042	-0.409295	-0.110762	-0.497515	0.328679	0.0845983	-0.146072	0.531431	0.0950078	0.156315	-0.490654	-0.523842	-0.179442	0.376272	0.668568	-0.412066	-0.580395	0.360585	0.40489	-0.149768	-0.173921	-0.316566	-0.378279	0.393141	0.0281407	0.695481	-0.264044	-0.547955
KEGG_MATURITY_ONSET_DIABETES_OF_THE_YOUNG	0.238543	0.307376	0.207649	0.24939	0.488048	0.0196013	0.542862	0.37466	0.389577	0.197081	-0.201903	0.266705	0.144158	-0.140765	0.492184	-0.248054	-0.0749397	-0.0389458	0.401068	0.378724	-0.265931	0.261484	0.359349	-0.00873479	-0.149455	0.377197	0.0156758	-0.424492	0.372141	-0.292265	0.218343	-0.348901	-0.0712975	-0.167745	0.369323	0.25757	-0.380709	0.177405	-0.0419825	-0.123312	-0.531904	0.0206508	0.48622	0.406728	0.160131	0.383178	0.599129	-0.25166	-0.169805
KEGG_ALDOSTERONE_REGULATED_SODIUM_REABSORPTION	-0.106455	-0.0431962	-0.16672	-0.121124	0.191635	-0.262905	0.0656526	-0.263988	-0.0713612	0.108815	-0.172289	-0.161344	0.0998518	0.266025	0.324406	0.0176242	0.357045	-0.408905	0.127246	-0.11921	0.172495	-0.0196865	0.0410673	0.288843	-0.341643	-0.0825515	-0.198053	0.121721	0.441173	-0.319145	-0.0821723	0.0738251	-0.152193	-0.44747	0.248898	0.105228	-0.236961	-0.0201951	-0.283661	-0.280723	-0.166528	0.384073	-0.00394686	0.124316	-0.353658	0.289996	-0.154807	0.486755	-0.461093
KEGG_VASOPRESSIN_REGULATED_WATER_REABSORPTION	0.00365418	-0.0120734	0.0508024	-0.304623	-0.253859	-0.319418	0.0806693	-0.25983	0.0349342	0.264971	-0.0835696	0.394274	-0.234295	0.300318	0.33286	-0.233155	0.135444	-0.0195459	-0.305914	-0.29346	0.151207	0.264789	-0.237306	0.0970486	0.118258	-0.0211502	-0.0121568	0.175164	-0.0322721	0.149261	-0.274367	0.335765	0.0120376	-0.000809737	-0.184344	-0.196688	0.0318641	0.145013	-0.224507	-0.0519539	-0.226827	-0.178693	0.0856225	0.288789	-0.197713	0.10065	-0.227225	0.263302	0.00033789
KEGG_ALZHEIMERS_DISEASE	0.0867104	0.339674	0.322355	-0.243864	0.209732	-0.191326	0.249093	0.35715	0.261908	0.0899247	-0.141106	-0.19665	-0.353187	0.227901	0.0264006	-0.336757	0.223885	-0.0722156	0.151412	0.118515	0.0987072	-0.110695	0.116617	0.088785	0.127725	-0.197379	-0.0705392	-0.208736	-0.325997	0.053587	0.0751968	0.0949044	0.0866933	0.317619	-0.345233	-0.118397	-0.154597	-0.144582	0.415606	-0.0046824	-0.28117	-0.292864	0.149526	-0.297308	0.330673	0.130136	0.318579	-0.194696	-0.221574
KEGG_PARKINSONS_DISEASE	-0.0715371	0.496607	0.458555	-0.211326	0.476504	-0.29777	0.383406	0.570948	0.472666	0.173781	-0.178828	-0.0678302	-0.549966	0.321315	-0.169604	-0.541541	0.29775	-0.249739	0.0619204	0.275585	0.209116	-0.233551	0.133845	-0.0806408	0.328933	-0.186764	-0.24039	-0.337403	-0.506266	0.0917517	0.0395084	0.0120212	0.143504	0.443955	-0.458041	-0.133148	-0.261324	-0.384533	0.560287	0.109239	-0.379228	-0.525539	0.203019	-0.345855	0.545902	0.157229	0.554152	-0.352951	-0.381265
KEGG_AMYOTROPHIC_LATERAL_SCLEROSIS_ALS	0.0196823	0.367529	0.330345	-0.0594299	-0.00926824	0.0367838	-0.115944	0.223299	0.0211347	-0.12155	0.218858	-0.0903573	-0.0113219	0.144044	0.0995712	-0.224239	0.153833	-0.0750791	0.122697	0.00559918	-0.0174003	0.245113	-0.0800992	0.0906015	0.148516	-0.0696343	-0.0783715	0.0574455	0.198331	0.128958	0.0824144	-0.219704	-0.150082	0.0775396	-0.108003	-0.0353953	0.0785995	-0.148563	0.232835	-0.258499	0.00217694	-0.234396	-0.106467	-0.332757	0.185519	0.0932035	0.296184	-0.221921	-0.215331
KEGG_HUNTINGTONS_DISEASE	0.0573267	0.361768	0.354723	-0.135786	0.3059	-0.255342	0.267692	0.377471	0.288582	0.22848	-0.131246	0.0229962	-0.483572	0.260848	0.00735599	-0.4717	0.257086	-0.109007	-0.129589	0.179591	0.0757386	-0.0858236	-0.0496734	0.118403	0.330728	-0.0803942	-0.0298886	-0.252923	-0.439925	0.174557	-0.0480625	0.0836725	0.194022	0.354361	-0.435907	-0.13469	-0.0831661	-0.215539	0.36843	0.0744658	-0.317084	-0.392045	0.111734	-0.203612	0.408683	-0.020061	0.308482	-0.270551	-0.236706
KEGG_PRION_DISEASES	0.0185349	0.217256	-0.187626	0.0374301	-0.164507	0.404469	0.0630111	-0.313131	0.0981971	-0.480616	0.260725	0.214006	0.118706	-0.0601013	-0.0914771	-0.36054	-0.0724867	-0.12916	-0.283986	-0.0885374	-0.0957986	0.145459	0.081501	0.404675	0.00706709	-0.119747	-0.157614	-0.021074	0.465814	0.319054	-0.0649681	-0.275232	-0.183403	-0.112053	0.152886	0.207829	-0.318804	0.0185177	0.176755	0.0619947	-0.00111951	-0.348984	-0.114163	0.16687	-0.131851	-0.100078	0.18	0.0162162	-0.358082
KEGG_VIBRIO_CHOLERAE_INFECTION	0.139966	0.299197	-0.0448937	-0.0712495	-0.0375322	-0.241137	0.232653	0.0056834	0.0138038	0.108639	-0.277148	0.00306318	-0.113572	-0.037994	0.224496	-0.197629	0.0807082	0.015219	-0.0778045	0.215742	-0.018361	-0.0126574	0.186364	0.19743	-0.0578115	-0.151113	0.0522014	0.151302	-0.105912	-0.102234	-0.0795991	0.182417	-0.0783148	0.0447969	0.183664	-0.355389	0.190465	-0.0486228	0.256997	0.0881318	-0.118359	-0.29138	0.149927	-0.205782	-0.0982664	0.186792	-0.074883	-0.0919198	-0.108684
KEGG_EPITHELIAL_CELL_SIGNALING_IN_HELICOBACTER_PYLORI_INFECTION	-0.232867	0.0400861	0.020629	-0.0782183	-0.108745	-0.287944	-0.0329703	-0.114216	0.0621059	-0.0173196	0.0874632	-0.0438109	-0.0649619	0.15722	0.178313	-0.0581709	-0.120157	-0.15052	-0.211636	-0.0293811	0.0102086	0.0601377	-0.249504	0.00941633	-0.0920403	-0.0863794	0.146206	-0.085822	0.0797267	0.0742059	-0.043071	0.222549	-0.346194	0.200436	-0.14717	-0.227407	0.162142	-0.16926	0.086746	0.146129	0.176094	-0.186504	0.0710561	-0.129565	-0.218968	-0.02641	-0.0772253	0.138947	0.0745503
KEGG_LEISHMANIA_INFECTION	-0.516298	0.396909	-0.53505	0.14888	0.178134	0.258749	-0.517842	-0.456916	0.368147	-0.452892	0.245876	0.0157139	0.450488	-0.180055	-0.206782	0.0758478	-0.398706	-0.554876	-0.467222	-0.565264	-0.0078221	-0.024481	-0.472513	-0.193562	-0.430804	0.0685543	-0.0499574	0.310039	0.501678	0.120453	-0.110178	-0.121086	-0.407379	-0.157203	0.142313	0.381151	-0.406783	-0.464789	0.254585	0.278499	0.185872	-0.18928	-0.429146	-0.17753	-0.242366	0.091066	0.467961	0.0527039	-0.355876
KEGG_PATHWAYS_IN_CANCER	-0.0655547	-0.207258	-0.144724	0.0809825	-0.30175	0.20318	-0.0312413	-0.089768	-0.107162	-0.222981	0.16384	-0.0256263	0.095036	-0.0781274	0.0247265	0.103774	-0.155304	0.0291082	-0.133788	-0.214382	0.127394	0.0274612	-0.041387	-0.0401716	-0.143992	-0.211333	-0.0639727	0.278217	0.246673	0.254379	-0.063447	0.160177	-0.0367228	-0.268474	-0.0502163	0.0789284	-8.29189e-05	-0.096535	-0.0991384	-0.0839531	0.193368	0.00479161	-0.0343453	0.0702974	-0.21333	0.0533064	-0.197138	0.14185	0.00250905
KEGG_COLORECTAL_CANCER	-0.202395	-0.331492	-0.201961	-0.129641	-0.407529	0.163083	-0.1834	-0.310049	-0.118589	-0.15376	0.251615	0.200693	-0.102766	-0.100458	0.0476328	0.22314	-0.115469	-0.0537118	-0.130248	-0.219883	0.0680311	-0.120408	-0.162771	0.0733864	0.0308747	-0.254189	-0.00687518	0.278888	0.282788	0.218594	-0.0755218	0.21739	-0.0847396	-0.221286	-0.179666	0.0259199	0.0857332	-0.322613	0.0551209	-0.0249907	0.0655664	0.181316	-0.00421467	0.0323498	-0.299756	-0.0437508	-0.255032	0.0562937	-0.0764442
KEGG_RENAL_CELL_CARCINOMA	-0.126875	-0.175209	-0.257262	0.124376	-0.433596	0.295335	-0.296761	-0.156725	-0.135884	-0.231668	0.161882	-0.0437844	0.0289435	-0.09955	0.111356	0.078719	-0.284175	-0.0528623	-0.390439	-0.348776	0.0861219	0.115396	-0.257111	-0.0565471	0.0667072	-0.502755	0.0122367	0.489772	0.334453	0.286279	-0.0395755	0.318227	-0.191131	0.120261	-0.222302	-0.10708	0.057752	-0.128531	-0.0160598	-0.114745	0.181225	-0.0310103	-0.129029	-0.104224	-0.436409	-0.139965	-0.349114	0.220806	-0.115027
KEGG_PANCREATIC_CANCER	-0.152563	-0.279745	-0.35947	0.181369	-0.40463	0.210669	-0.272723	-0.152421	-0.0214793	-0.201556	0.225022	-0.0505385	0.00213203	-0.15567	-0.0274948	0.130001	-0.312888	-0.0783996	-0.384271	-0.208229	-0.0336596	-0.120721	-0.22717	-0.0965822	-0.0114564	-0.31134	0.142602	0.332438	0.177031	0.410076	-0.156958	0.131457	-0.066785	0.0159475	-0.094161	-0.231244	0.201922	-0.338729	0.00641459	0.0419682	0.231145	-0.0434992	0.0187298	-0.198545	-0.367807	-0.067017	-0.20104	-0.0369331	7.47099e-05
KEGG_ENDOMETRIAL_CANCER	-0.0508655	-0.371076	-0.175618	-0.163584	-0.404157	0.0161422	-0.261551	-0.259672	-0.138332	-0.0495981	0.0415987	0.267533	0.151558	0.0802448	0.155923	0.113423	-0.103013	-0.0417037	-0.30587	-0.218444	0.0183508	-0.219606	-0.242981	0.0794222	0.0443514	-0.284608	0.0832525	0.391834	0.22534	0.0304743	-0.166489	0.290612	-0.133157	0.0223914	-0.233659	-0.0191402	0.185123	-0.153349	-0.166708	0.0940502	0.139153	0.0917059	0.129653	0.0913516	-0.440347	-0.00448739	-0.396507	0.252353	-0.107271
KEGG_GLIOMA	-0.102202	-0.27221	-0.347733	0.0545456	-0.388148	0.338911	-0.125868	-0.207755	-0.117727	-0.265833	0.294364	0.0548715	0.229704	-0.108803	-0.089521	0.167035	-0.212522	-0.0111852	-0.135151	-0.0688228	0.191027	-0.072486	0.0407721	0.067298	-0.00423031	-0.326052	0.133918	0.378733	0.312076	0.278853	0.0112524	0.197212	-0.0952233	-0.1489	0.0501106	-0.0778656	0.218182	-0.257846	-0.170834	-0.0333595	0.112085	0.103039	-0.0637664	0.0387949	-0.345505	-0.0664507	-0.322217	0.301133	-0.12495
KEGG_PROSTATE_CANCER	-0.048135	-0.258187	-0.0734166	-0.0199255	-0.39269	0.0222344	-0.0111048	-0.170977	-0.132036	-0.229352	0.145306	0.116445	0.138878	0.137706	-0.0438244	0.120284	-0.102512	-0.00186501	-0.237894	-0.216712	0.187283	-0.00225873	-0.065683	0.234983	0.118247	-0.303648	-0.0636513	0.33191	0.262103	0.246827	-0.159685	0.131147	-0.0848998	-0.0423694	0.0188907	-0.0318547	0.205348	-0.0285342	-0.279597	-0.0936947	0.262647	0.0179575	0.0708107	0.0278284	-0.337179	-0.111095	-0.326444	0.248528	-0.109216
KEGG_THYROID_CANCER	0.122257	-0.274301	0.0636284	-0.00920313	-0.133038	-0.239965	0.00419179	-0.131674	0.13891	0.0820038	0.00739146	0.157463	0.0487824	0.214679	0.249194	-0.298878	0.112988	-0.00773154	-0.367743	0.0753542	0.108752	-0.159064	-0.317739	0.341152	-0.0325338	-0.0746237	0.164211	0.355965	0.224808	0.177163	-0.268092	0.32081	-0.165993	-0.0864116	-0.247547	-0.000456646	0.258367	-0.0884822	0.0996264	0.0428406	-0.271431	-0.187151	0.00965684	-0.335075	-0.170467	-0.0107514	-0.386919	0.136475	-0.140019
KEGG_BASAL_CELL_CARCINOMA	-0.0213151	-0.00215706	0.189855	-0.0706801	-0.267035	0.00750969	0.375852	-0.217534	-0.0954295	0.0121281	0.100751	0.0063668	0.149888	-0.112319	0.142445	-0.0501966	-0.175833	0.310405	0.382058	-0.00287364	-0.0410389	0.0547874	0.375151	0.114866	-0.0933512	0.15297	-0.198408	0.23031	0.432131	0.133274	-0.149057	0.401973	-0.0378668	-0.447996	-0.12866	0.171462	-0.180919	0.375059	-0.29018	-0.160231	0.0491201	0.000630314	0.21558	0.444284	-0.175201	0.11392	-0.300349	0.289257	-0.0674958
KEGG_MELANOMA	-0.0488631	-0.014348	-0.391053	-0.0561477	-0.172752	0.236159	-0.11573	-0.225642	0.174986	-0.250919	0.180657	0.0283234	-0.0304068	-0.0457773	-0.0954815	0.235008	-0.257687	-0.106015	-0.10781	-0.164881	-0.0687871	-0.177623	0.10088	0.0366994	-0.0394506	-0.276614	-0.149354	0.374266	0.304889	0.289293	0.0748548	0.137725	-0.0816194	-0.17947	0.0064795	-0.00372444	-0.117243	-0.257135	-0.0590271	-0.109594	0.187087	0.119656	0.125306	0.0662093	-0.156764	-0.00082853	-0.163052	0.252318	-0.0706768
KEGG_BLADDER_CANCER	0.202269	-0.043585	0.0964502	0.107163	-0.323598	0.153667	-0.16284	0.0523939	0.219091	-0.0968291	-0.0471828	-0.11445	-0.048519	-0.153192	-0.0869751	-0.190211	-0.315764	0.0618943	-0.306502	-0.190335	-0.174735	-0.0596212	-0.0959153	0.0607803	0.035799	-0.16244	0.180889	0.329279	0.14629	0.284853	-0.142271	0.139588	0.30288	-0.138521	-0.222792	-0.151473	0.0154544	-0.238379	0.0839576	-0.192965	0.109636	-0.314814	0.0263645	-0.247738	-0.223588	-0.185571	-0.190114	-0.0768398	0.0793548
KEGG_CHRONIC_MYELOID_LEUKEMIA	-0.0930668	-0.411351	-0.197253	0.0658126	-0.429172	0.277004	-0.189435	-0.159086	-0.212909	-0.0445109	0.254639	0.261752	0.130599	-0.0871235	-0.0684776	-0.00364313	-0.117308	0.0734011	-0.31545	-0.222585	0.0629552	0.172404	-0.195641	0.0734323	-0.0201622	-0.307309	0.0893501	0.406017	0.259771	0.293762	0.0773895	0.0753318	-0.0578587	-0.161755	-0.234807	-0.130309	0.265021	-0.192634	-0.164148	0.0914734	0.0635346	-0.0871631	-0.0872999	0.0037085	-0.377324	-0.00010383	-0.380572	0.124032	-0.016015
KEGG_ACUTE_MYELOID_LEUKEMIA	-0.319816	-0.236973	-0.170722	-0.0410466	-0.328178	0.138284	-0.156358	-0.21118	-0.129589	-0.249924	0.16003	0.191688	0.380088	-0.151241	0.00645696	-0.0112426	-0.180358	-0.018309	-0.36475	-0.199729	0.118348	0.0488861	-0.280653	0.0802463	-0.0591051	-0.295041	0.183366	0.225755	0.32354	0.0966247	-0.0602789	0.230541	-0.0254424	-0.0535637	-0.0508744	0.0773057	0.0537907	-0.191219	-0.160326	0.152637	0.0833434	-0.148018	-0.150648	0.0757112	-0.383823	0.180332	-0.331823	0.167529	-0.0246781
KEGG_SMALL_CELL_LUNG_CANCER	-0.0225151	-0.420334	-0.297524	0.229358	-0.420621	0.235082	-0.189459	0.0154832	-0.207836	-0.264364	0.369699	-0.0695635	0.152859	-0.136666	-0.14303	0.18239	-0.225124	-0.0583569	-0.173476	-0.092826	0.264133	0.0538897	-0.0919684	-0.0613756	-0.103607	-0.234791	-0.0767	0.368697	0.189102	0.35815	-0.0293301	0.0877955	-0.165391	-0.312084	-0.113919	-0.164386	0.154694	-0.157083	-0.116275	0.0473018	0.363156	0.104254	-0.00444509	-0.112336	-0.174915	-0.0866915	-0.2553	0.155505	0.169804
KEGG_NON_SMALL_CELL_LUNG_CANCER	-0.135155	-0.323576	-0.26787	0.0274301	-0.302918	0.144095	-0.266232	-0.12126	-0.0970809	-0.156006	0.18337	0.0491912	0.306251	-0.0802755	-0.0583349	0.0873212	-0.328859	-0.0767778	-0.245843	-0.0655238	0.152188	-0.0535331	-0.249971	-0.0358191	0.0218661	-0.295928	0.0254291	0.31145	0.27122	0.0851405	-0.0667542	0.299733	-0.184851	-0.141729	-0.0763365	-0.0349304	0.114048	-0.319722	-0.164573	0.0377003	0.141337	-0.00647807	-0.220724	-0.0821825	-0.302953	0.125047	-0.299663	0.214985	-0.225256
KEGG_ASTHMA	-0.66346	0.722982	-0.61533	-0.272874	0.626942	0.182537	-0.137238	-0.652702	0.628562	-0.216034	-0.292253	0.165688	0.589546	-0.187362	-0.237135	0.199568	-0.329238	-0.712112	-0.276894	-0.50988	-0.325374	-0.540942	-0.357903	-0.237863	-0.518142	0.50772	-0.271294	-0.172524	0.569299	-0.402774	-0.169297	-0.538176	-0.600285	-0.0356704	0.401785	0.661838	-0.632407	-0.673346	0.369404	0.528803	-0.325604	0.237399	-0.0978891	0.0622093	0.281717	0.110152	0.733642	-0.0567866	-0.116014
KEGG_AUTOIMMUNE_THYROID_DISEASE	-0.643228	0.632157	-0.619692	0.176722	0.463092	0.465243	-0.399243	-0.483946	0.579408	-0.397223	-0.147017	-0.183424	0.686069	-0.043528	-0.125089	0.298174	-0.180164	-0.617677	-0.286664	-0.400017	-0.0758485	-0.365926	-0.367056	-0.152552	-0.532996	0.397075	-0.00129323	-0.275829	0.591888	-0.00747796	-0.0268766	-0.537946	-0.543047	-0.111126	0.453149	0.527868	-0.433568	-0.645041	0.290703	0.3879	-0.270738	0.30687	-0.158694	-0.336521	0.39338	0.15877	0.680009	-0.0168278	-0.491092
KEGG_ALLOGRAFT_REJECTION	-0.711631	0.568784	-0.712845	0.259257	0.514002	0.504679	-0.607272	-0.587083	0.657538	-0.422406	-0.0740772	-0.241282	0.73261	-0.143251	-0.217976	-0.0158876	-0.486398	-0.714928	-0.457458	-0.488362	-0.0588758	-0.354946	-0.603521	-0.161483	-0.600238	0.384602	-0.0152383	-0.351278	0.627586	-0.119738	-0.0615232	-0.56097	-0.597801	-0.223724	0.48163	0.672712	-0.504786	-0.710566	0.399971	0.509885	-0.286638	0.123842	-0.398829	-0.404614	0.447881	-0.0411383	0.728532	0.00599573	-0.47827
KEGG_GRAFT_VERSUS_HOST_DISEASE	-0.733036	0.632802	-0.696514	0.391662	0.403672	0.554227	-0.613091	-0.516529	0.676011	-0.583468	0.0459401	-0.393333	0.727993	-0.180448	-0.324447	-0.112556	-0.533581	-0.747302	-0.611454	-0.535677	-0.0967087	-0.176159	-0.594867	-0.18748	-0.590263	0.347845	0.0469631	-0.202891	0.661683	0.132667	0.0704868	-0.570273	-0.670343	-0.0720916	0.45666	0.696589	-0.491086	-0.75019	0.438142	0.380563	-0.0881429	-0.0597315	-0.463471	-0.473624	0.392263	-0.185622	0.721343	-0.277574	-0.577322
KEGG_VIRAL_MYOCARDITIS	-0.457304	0.349528	-0.509918	-0.0221863	-0.010697	0.369693	-0.495465	-0.305313	0.211508	-0.293665	0.297954	-0.0399046	0.403796	-0.0974039	0.0449464	0.26118	-0.230642	-0.499818	-0.281722	-0.423937	0.0198282	-0.268928	-0.437333	-0.33199	-0.450529	0.194393	-0.0263347	0.307103	0.484317	0.169997	-0.171116	0.0431843	-0.345499	-0.0797344	0.119753	0.349323	-0.38296	-0.474139	-0.0710923	0.421705	0.129687	0.0958452	-0.205679	-0.227505	-0.188347	0.0128187	0.224522	-0.00493113	-0.0710792
[truncated: 1,617 more columns]
