# Supplementary material for: Identification of fatty acid-related subtypes, the establishment of a prognostic signature, and immune infiltration characteristics in lung adenocarcinoma
Source: Aging (Albany NY). 2023 May 16;15(10):4202–35. doi: 10.18632/aging.204725 (PMC10258028; doi:10.18632/aging.204725)
Supplement: Supplementary Table 7 [file aging-15-204725-s006.xlsx]

## Sheet: Sheet1
Supplementary Table 7. The tumor-infiltrating immune cells of LUAD patients by ssGSEA.
ID	aDC	B cells	CD8 T cells	Cytotoxic cells	DC	Eosinophils	iDC	Macrophages	Mast cells	Neutrophils	NK CD56bright cells	NK CD56dim cells	NK cells	pDC	T cells	T helper cells	Tcm	Tem	TFH	Tgd	Th1 cells	Th17 cells	Th2 cells	TReg
GSM1672281	0.204673	0.0266249	0.19768	0.16289	-0.107364	-0.0503835	0.0587109	0.199686	-0.0614043	-0.0770714	-0.0575317	-0.062357	-0.0762009	-0.126007	0.22869	0.198557	0.0416178	0.11245	-0.00546471	0.0783958	0.0681671	-0.1246	-0.0648716	-0.305213
GSM1672282	0.00737766	-0.200603	0.17693	-0.0139328	-0.00446221	-0.0310191	0.145688	0.21767	-0.0329305	-0.100949	-0.113742	-0.068071	-0.050013	-0.281041	0.0169852	0.193973	-0.00465895	0.0695738	0.00267119	0.0362016	-0.0190088	-0.0816494	-0.0893521	-0.397146
GSM1672283	0.0863175	-0.0932789	0.197929	0.0422771	0.061956	-0.00520807	0.165263	0.172823	-0.00948123	-0.108205	-0.105286	-0.14053	-0.0724074	-0.199689	0.0791614	0.160482	0.0350508	0.0499581	0.0187028	-0.0010041	0.0100611	0.0325761	-0.0748336	-0.343268
GSM1672284	0.0278966	0.0232985	0.206086	0.101216	-0.0306123	-0.017091	0.167924	0.214838	-0.0113569	-0.0385003	-0.0642452	-0.0990816	-0.113277	-0.393166	0.138947	0.168473	-0.00133525	0.116843	-0.0120187	0.055898	0.0112396	0.0612635	-0.101943	-0.207067
GSM1672285	0.0768432	-0.170005	0.146901	-0.016255	-0.0307611	0.0153034	0.134133	0.14774	-0.0390661	-0.0848801	0.0493906	-0.0443133	-0.0803526	-0.25648	0.0702613	0.186131	-0.053472	0.0646446	-0.039083	0.0672025	-0.0169236	-0.116501	-0.05073	-0.286865
GSM1672286	-0.00926629	-0.25028	0.148811	-0.0502124	-0.0708494	-0.0305329	0.0480221	0.0956484	-0.0209505	-0.11985	-0.0925126	-0.116387	-0.0885081	-0.27842	-0.0666232	0.167976	-0.000478597	0.024514	-0.00545464	-0.0630352	-0.0382438	-0.054926	-0.0691302	-0.132123
GSM1672287	0.138594	-0.0997762	0.182637	-0.011695	0.120117	-0.014815	0.0957694	0.163181	-0.0612965	-0.0629506	-0.104437	-0.032914	-0.0795225	-0.114552	0.0141797	0.173821	-0.00810289	0.0279845	0.0342427	-0.019417	0.0200789	-0.0603894	-0.0609319	-0.191244
GSM1672288	0.0980588	-0.00513941	0.189755	0.0164219	-0.00135589	-0.0266675	0.125737	0.197653	0.00349184	-0.0366555	-0.0140261	-0.07122	-0.106856	0.0267935	0.0990633	0.196076	0.0284836	0.123563	0.0596547	0.078895	0.0107408	-0.111134	-0.0646338	-0.294729
GSM1672289	0.162093	-0.134792	0.163647	0.0175098	0.0580069	-0.032226	0.139368	0.13257	-0.0760894	-0.0738662	-0.0766862	-0.116512	-0.0447438	-0.241821	-0.107276	0.183851	0.00664878	0.0334847	-0.0223236	-0.0458933	0.0291264	-0.0163299	-0.102269	-0.46811
GSM1672290	0.044075	-0.054974	0.181893	-0.0509126	-0.095293	-0.0342028	0.0603089	0.198263	-0.0588753	-0.0734093	-0.0655246	-0.137296	-0.0499651	-0.329968	-0.000508249	0.193474	-0.00683606	0.0695248	0.00854296	0.0115777	0.057373	0.0117708	-0.0724233	-0.310747
GSM1672291	0.190716	-0.12187	0.152487	0.00558788	0.12274	-0.0261616	0.0902315	0.281077	-0.0606507	-0.0881922	-0.061443	-0.0867518	-0.0735023	0.13222	0.0755245	0.212072	0.00677192	0.0807597	0.0333297	-0.00547891	0.0518112	0.0242271	-0.0870411	-0.194253
GSM1672292	0.242464	-0.0557804	0.171853	0.100389	-0.098217	-0.0631354	0.163499	0.263449	-0.0890771	-0.0632559	-0.115828	0.00426727	-0.0394204	-0.203281	0.184388	0.215355	0.0225681	0.117182	0.0184237	0.0132069	0.0367076	0.00231569	-0.0393769	-0.41462
GSM1672293	-0.00258597	-0.213532	0.174113	-0.10302	-0.1279	0.0288212	0.0739868	0.182394	-0.0195628	-0.0287017	-0.00370409	-0.077717	-0.0448952	-0.248034	-0.0131493	0.169725	-0.0163052	0.0295253	-0.0689686	-0.0809812	0.0143337	-0.0913238	-0.0109505	-0.269877
GSM1672294	0.316972	-0.0328791	0.170422	0.0946504	0.0295417	-0.00261494	0.113623	0.193989	-0.119662	-0.0223878	-0.162091	0.00153382	-0.0465774	-0.0354335	0.173816	0.21255	-0.019586	0.119833	-0.0143751	0.0635729	0.0561336	-0.0584321	-0.0336662	-0.265314
GSM1672295	0.174325	-0.204509	0.136871	-0.103434	-0.173096	-0.0218586	0.0262887	0.106048	-0.121063	-0.0541117	-0.0370713	-0.0963409	-0.0815266	-0.293952	-0.0994299	0.229436	-0.0162089	0.0459354	0.00983487	-0.0774977	0.0046699	-0.136268	0.0237711	-0.259878
GSM1672296	0.00355293	-0.193978	0.141017	-0.101682	-0.156216	-0.0055624	0.0212171	0.0594898	-0.094809	-0.145127	-0.00267524	-0.0697024	-0.060244	-0.339676	-0.145756	0.176901	-0.0209648	0.0369709	-0.0407329	-0.0852676	-0.0416833	0.0385862	0.0202148	-0.312882
GSM1672297	0.137604	-0.182982	0.148436	-0.0375422	-0.0702412	-0.020774	0.0524219	0.137284	-0.118066	-0.0925742	-0.0444225	-0.0060752	-0.044991	-0.251626	-0.0525044	0.187039	-0.0253551	0.0218957	-0.031865	-0.0149062	0.0199649	0.0061663	-0.0535165	-0.219687
GSM1672298	0.0695379	-0.120678	0.171741	0.00685155	0.0241417	-0.0111867	0.143914	0.278063	-0.0293103	-0.00346186	-0.151411	-0.0692252	-0.0888868	-0.301621	0.0549205	0.175933	0.00733321	0.107251	0.0188508	0.0114213	0.00891421	-0.051506	-0.0689226	-0.272401
GSM1672299	0.182954	-0.149428	0.176736	0.16492	0.0574097	-0.0165895	0.0844913	0.134918	-0.197097	0.00848994	-0.0784322	0.0313465	-0.0697476	-0.296961	0.125958	0.197363	0.0130447	0.0467729	-0.028313	0.0126858	0.0826776	-0.0610819	-0.00946997	-0.233278
GSM1672300	0.0965283	-0.190817	0.150074	0.043921	0.0182785	0.00575219	0.0541173	0.0320375	-0.0535137	-0.0825336	-0.0721785	-0.1324	-0.0624478	-0.255606	-0.0796225	0.228877	0.0399342	0.0544022	0.0383534	-0.100936	-0.015214	-0.147207	-0.104511	-0.357926
GSM1672301	0.0268521	-0.104845	0.150369	-0.0497547	0.0328771	0.0106634	0.12227	0.189403	0.0295153	-0.0794747	-0.104453	-0.0688397	-0.0722154	-0.235026	0.0180877	0.189483	0.0275494	0.0711541	0.0405456	0.0189028	-0.00438951	0.0456346	-0.0727592	-0.253082
GSM1672302	0.177626	-0.220014	0.131927	0.0181473	-0.199155	-0.0470224	0.0420961	0.155053	-0.101537	0.048743	-0.0988907	-0.0209167	-0.0864816	-0.299583	-0.0672965	0.164815	-0.0367754	-0.0118558	-0.0811841	-0.0938534	-0.017028	-0.132839	-0.0362855	-0.249102
GSM1672303	0.131243	-0.23352	0.1138	-0.076608	-0.0514567	-0.0176586	0.0752921	0.14539	-0.0218096	-0.0671094	-0.0984089	0.00933052	-0.0430672	-0.257548	-0.118865	0.238652	-0.00983502	0.0096107	-0.0369375	-0.0614638	0.00699856	-0.00659371	0.0221406	-0.280264
GSM1672304	0.272403	-0.198701	0.173246	0.153809	0.0169367	-0.0343707	0.0787674	0.201917	-0.119237	-0.0386506	-0.0732252	0.0398146	-0.0570736	0.00883409	0.0995728	0.230368	-0.0155463	0.0257994	-0.0258975	0.0121868	0.0583513	-0.0715525	0.000557714	-0.256092
GSM1672305	0.0351456	-0.216501	0.135104	-0.152761	-0.105508	-0.0207732	0.0326052	0.150717	-0.092779	-0.0664894	-0.0895238	-0.0707747	-0.0405988	-0.358509	-0.181116	0.158521	-0.0383454	0.0324855	-0.0834433	0.0422939	-0.0108168	-0.194029	-0.00308142	-0.274731
GSM1672306	0.177775	-0.151825	0.172072	0.00420399	0.0134153	-0.00725602	0.083742	0.191259	-0.07601	-0.0159106	-0.0698998	0.00906279	-0.0531666	-0.415591	0.0105843	0.197888	0.00500652	0.0393721	-0.0651235	-0.0288572	0.00731706	-0.0908646	-0.050259	-0.262596
GSM1672307	0.204475	-0.223235	0.159944	0.06948	-0.111847	0.00831415	0.0357482	0.132378	-0.117959	-0.0904882	-0.0780253	-0.0410433	-0.040759	-0.305698	-0.0394514	0.200766	0.044129	0.0501785	-0.0202331	-0.0250725	-0.00289272	-0.0349792	-0.0101789	-0.395593
GSM1672308	0.0870902	-0.21006	0.158582	0.0371844	0.0292268	-0.0199127	0.0763428	0.200173	-0.0755194	-0.0804365	-0.10447	-0.0183391	-0.0392519	-0.302786	-0.00745289	0.185769	0.00163069	0.0328523	-0.0114999	0.0303132	0.0507202	-0.115882	-0.0782147	-0.482963
GSM1672309	0.0174453	-0.220768	0.147638	-0.110673	-0.0187516	-0.0521179	0.0768855	0.11617	-0.065348	-0.0427551	-0.0870284	-0.116282	-0.0819923	-0.24318	-0.105862	0.220527	-0.0172752	0.0209023	-0.0570612	-0.0242803	-0.0179812	-0.0529996	-0.0521509	-0.397049
GSM1672310	0.0532095	-0.230172	0.194703	-0.0125219	-0.0479982	-0.0251541	0.0191526	0.0984461	-0.162985	-0.0676463	-0.119884	-0.0183257	-0.0628663	-0.117464	-0.0874744	0.187402	-0.027425	0.0330627	-0.0589777	-0.0639535	0.0185976	-0.21342	-0.02315	-0.233958
GSM1672311	0.284166	-0.0855873	0.204248	0.166351	0.110178	-0.0465492	0.139552	0.275517	-0.111954	-0.0433321	-0.0281824	0.0591025	-0.0734179	0.0662072	0.214811	0.227076	0.0233848	0.0994807	-0.0264331	0.0264602	0.0948542	0.0231286	-0.0494558	-0.231628
GSM1672312	0.221588	-0.184233	0.128318	0.011323	-0.0129813	-0.0176595	0.128365	0.223637	-0.0697229	0.0464922	-0.0852254	-0.0324379	-0.0665541	0.166683	-0.00852928	0.184524	-0.0319085	0.00334451	-0.0349875	0.0124778	0.0250321	-0.0802842	-0.0127246	-0.281235
GSM1672313	0.0606305	-0.230394	0.143953	0.0262702	-0.128036	-0.0451099	0.0246308	0.13228	-0.159847	-0.100264	-0.0738621	-0.0815125	-0.0575257	-0.25182	-0.0714572	0.184077	-0.0237205	0.0409806	0.00853748	-0.040564	0.0131725	-0.182404	-0.0251771	-0.241627
GSM1672314	0.291107	-0.0766098	0.157491	0.0659771	0.040627	-0.0427956	0.103929	0.218026	-0.123371	0.0576964	-0.0458893	0.0539497	-0.0649372	-0.156878	0.0429271	0.195056	0.0129999	0.0395135	-0.00178376	0.0716438	0.0327124	-0.127271	-0.0392924	-0.264635
GSM1672315	-0.028371	-0.192496	0.118079	-0.00277862	-0.170968	-0.0203408	0.00412626	0.0300378	-0.175233	-0.0934036	-0.0418836	-0.0960055	-0.051291	-0.316474	-0.0849032	0.168224	-0.0297939	-0.0439887	-0.0496503	-0.0743429	-0.0705967	-0.212793	-0.04126	-0.305213
GSM1672316	0.0848119	-0.204192	0.152003	-0.0373552	-0.0323901	-0.0024781	0.0744047	0.125483	-0.0346841	-0.0501274	0.0363368	-0.099217	-0.0659742	-0.310164	-0.0518162	0.192571	-0.00489245	0.0411428	-0.0318153	-0.000228343	-0.0463121	-0.0674508	-0.0458243	-0.329385
GSM1672317	0.239334	-0.216115	0.137297	0.00709167	0.0533836	-0.0620987	0.0826191	0.155607	-0.118812	-0.0877357	-0.0466705	0.0202569	-0.0510257	-0.252791	-0.047701	0.219803	-0.0449087	0.0517332	-0.0313345	-0.0407499	0.0455128	-0.163798	0.0291795	-0.148821
GSM1672318	-0.0330442	-0.19646	0.154311	-0.0334223	-0.119453	-0.0320499	0.0532937	0.206519	-0.115285	-0.0535654	0.0110643	0.0387645	-0.0251541	-0.24551	-0.101061	0.189822	-0.0394724	-0.0180211	-0.0662493	-0.0349464	-0.00508081	-0.119187	-0.00300788	-0.300748
GSM1672319	0.164984	-0.134437	0.173824	0.10565	0.099536	0.00315943	0.0912432	0.22192	-0.0997061	-0.0460374	-0.094383	-0.00467014	-0.0791581	0.177556	0.13073	0.225768	0.00306436	0.0765558	0.0271939	0.0130794	0.0945028	-0.053896	-0.0122804	-0.242112
GSM1672320	0.0885759	-0.256219	0.155714	-0.0562874	0.0742986	-0.000738698	0.143939	0.229326	-0.0177686	-0.0587545	-0.0764048	-0.0705009	-0.0456174	-0.0626153	-0.061533	0.185504	-0.0145741	0.0297389	-0.00972601	-0.0261447	0.0411211	-0.133213	-0.061676	-0.244054
GSM1672321	0.0385765	-0.112799	0.166812	0.0525939	0.0126728	0.0112159	0.0702115	0.270176	-0.0877942	-0.0704515	-0.0560266	-0.0163725	-0.0415448	-0.305796	0.0244258	0.179466	0.0111624	0.0409828	0.0142996	-0.00484895	0.0294577	-0.0397445	-0.0658177	-0.30201
GSM1672322	0.103475	-0.0730172	0.197952	0.0602895	0.0144229	0.0108642	0.170021	0.191057	-0.0078931	-0.044717	-0.00971565	-0.0293014	-0.0755758	-0.221435	0.0916684	0.20601	0.0548476	0.0793831	0.0119189	0.0981228	0.0332441	-0.0564787	-0.0868238	-0.276769
GSM1672323	0.245245	-0.187961	0.155245	0.0840008	-0.0401613	-0.0163978	0.0527195	0.247378	-0.0677426	-0.0116956	-0.147966	0.0190524	-0.0623368	-0.331521	0.0616808	0.182968	0.00311211	0.0503247	0.0019471	0.050398	0.0614482	-0.134848	-0.0534524	-0.30696
GSM1672324	0.122972	-0.199378	0.118182	0.00525377	0.0816907	-0.0144671	0.0657025	0.246914	-0.0922682	-0.0553155	-0.125139	0.00294141	-0.0590588	0.038637	-0.0215253	0.213356	-0.0238542	0.0317843	-0.0464357	-0.0111406	0.037804	-0.129955	-0.0360203	-0.26114
GSM1672325	0.140295	-0.173967	0.154325	-0.0297367	0.054184	0.00460281	0.134401	0.249252	-0.0584054	-0.0629018	-0.0935615	-0.042769	-0.0496542	-0.319095	0.0259617	0.184925	-0.0221952	0.0578039	0.0193074	0.0276823	0.022667	-0.0218156	-0.0708228	-0.289486
GSM1672326	0.210259	-0.162242	0.134753	-0.00541335	-0.0618162	-0.0153453	0.0810464	0.245807	-0.0768305	-0.0583656	-0.0668464	-0.0021177	-0.0739321	-0.306378	-0.015999	0.196662	-0.00895299	0.0595225	-0.0177862	-0.01646	0.00930347	-0.142061	-0.0620853	-0.188234
GSM1672327	0.102114	-0.171219	0.149744	0.0474032	0.0470153	0.00646319	0.0812831	0.213259	-0.0710763	-0.019804	-0.0476297	0.00244551	-0.0640215	0.0388312	0.0164119	0.194032	0.00436299	0.0383048	-0.0194186	0.0199361	0.00613555	-0.0771043	0.0126491	-0.276284
GSM1672328	0.201243	-0.172898	0.144857	-0.0870563	0.0149467	0.00670454	0.109469	0.242218	-0.000102452	-0.065706	-0.0964831	-0.0383555	-0.0344385	0.0375692	-0.111256	0.170712	-0.0171662	0.0258474	-0.0428463	0.00105711	0.0344572	-0.0674302	-0.0277964	-0.292205
GSM1672329	0.111146	-0.149003	0.192421	0.00122271	0.0214636	0.011501	0.107934	0.214562	-0.0848859	-0.0772014	-0.0118494	-0.0483702	-0.0806745	-0.257548	-0.00548162	0.193248	0.0287285	0.074954	0.00498817	0.0160185	0.0499356	-0.0980019	-0.0993637	-0.346374
GSM1672330	0.156157	-0.096282	0.194001	0.114722	0.0580666	-0.0144655	0.107878	0.213233	-0.107254	-0.0515683	-0.104976	0.0141443	-0.0600358	-0.185807	0.14194	0.202231	0.0160842	0.0888024	-0.0123806	0.0212375	0.0656126	-0.0324149	-0.0477259	-0.237064
GSM1672331	0.10379	-0.0806736	0.195014	0.0801673	-0.0639074	-0.0164504	0.0106833	0.115762	-0.126188	-0.0722598	0.0677687	-0.0209571	-0.0656037	-0.364916	0.00495697	0.179711	0.0304989	0.0499282	-0.049235	-0.0392542	-0.00353875	-0.100897	-0.0267303	-0.261819
GSM1672332	0.231468	-0.0838468	0.147857	0.0596706	-0.0838623	-0.0111955	0.0557279	0.170672	-0.0822433	0.0201616	-0.0552401	-0.0119835	-0.0621627	-0.24949	0.0229278	0.184464	0.00531453	0.0376487	-0.0393381	-0.0111432	0.0135263	-0.0477785	0.00545822	-0.259101
GSM1672333	-0.0121978	-0.16768	0.19494	-0.069118	0.0996811	0.00350239	0.0845676	0.144428	0.030831	-0.0660497	-0.0225064	-0.0758624	-0.0752145	-0.255412	0.0079254	0.217079	0.0325033	0.0684117	0.0416281	0.0267076	0.0481493	-0.0309926	-0.0997298	-0.265023
GSM1672334	0.13411	-0.15586	0.187824	0.0886182	0.106142	-0.0099168	0.132628	0.265301	-0.0545988	0.0819025	-0.113438	0.0475143	-0.0525515	0.0624211	0.0764848	0.194304	0.0107901	0.0545764	-0.0424186	0.00493691	0.0441103	-0.0416539	-0.0536005	-0.248811
GSM1672335	0.163109	-0.0817338	0.189213	0.0544154	-0.0231529	-0.0244115	0.10099	0.202325	-0.131401	-0.115459	-0.0809092	0.00571518	-0.0588686	-0.30764	0.0861542	0.206487	0.0201759	0.027411	-0.0147731	0.00259452	0.0270704	-0.124763	-0.0609602	-0.266091
GSM1672336	0.08468	-0.152886	0.139808	-0.00540241	0.0322036	-0.0283061	0.0428637	0.154815	-0.174488	-0.051267	-0.0946494	-0.0329745	-0.0519347	-0.315309	-0.0058787	0.211713	-0.000843743	0.0299287	-0.0447027	-0.0105097	0.0237894	-0.241309	-0.024708	-0.2824
GSM1672337	0.0788974	-0.0753574	0.17667	0.0345855	-0.123565	-0.00707229	0.112973	0.241637	0.00373161	-0.0313465	-0.0916826	-0.00564381	-0.0420123	0.0166974	0.109382	0.188364	0.0111696	0.110355	-0.0161444	0.0179849	0.0277869	-0.0723286	-0.00567015	-0.263081
GSM1672338	0.236343	-0.187635	0.15549	0.162676	0.100118	-0.0413082	0.116772	0.297316	-0.0869435	-0.00820966	-0.0724183	-0.0476398	-0.0836704	-0.300942	0.0871578	0.198421	-0.0100743	0.0276589	-0.00141596	0.0101869	0.0261747	-0.148572	-0.0106968	-0.173575
GSM1672339	0.189169	-0.179103	0.159538	0.0747948	-0.0356404	-0.0184847	0.0614842	0.198188	-0.103051	-0.0826774	-0.048134	0.00920713	-0.063201	-0.318901	0.0560376	0.216038	-0.0106443	0.0583364	-0.0224605	0.0256601	0.0195073	-0.182622	-0.0423504	-0.350451
GSM1672340	0.123792	-0.145051	0.174927	-0.0200031	0.00125857	-0.0347072	0.0675404	0.131589	-0.121341	-0.0795445	-0.0349511	-0.0371468	-0.0562708	-0.236482	-0.0189439	0.178584	0.0146803	0.0467525	-0.0316646	-0.00372361	0.0102651	-0.248464	-0.0384354	-0.275022
GSM1672341	0.152373	-0.150012	0.155221	0.0300395	0.018959	-0.032075	0.0561727	0.2236	-0.0929571	0.00391347	-0.0431156	0.0245592	-0.03726	-0.298126	-0.0264237	0.188803	-0.000398985	0.053711	-0.0319851	0.00467983	0.0314827	-0.181819	0.0142402	-0.157266
GSM1672342	0.0818023	-0.221778	0.124331	-0.140584	0.0855056	-0.0221386	0.128894	0.326367	-0.0666466	-0.0381557	-0.0338168	0.00310135	-0.00581504	0.137851	-0.0485312	0.177561	0.00440789	0.0748752	-0.0304512	-0.00545792	0.0239327	-0.0449919	-0.041381	-0.240462
GSM1672343	0.204603	-0.247465	0.164379	-0.0414703	0.0320618	0.0152177	0.0581861	0.158337	-0.123888	-0.0789753	-0.00356121	-0.0447128	-0.0507174	-0.184642	-0.0143518	0.200908	-0.00488637	0.0345209	-0.000467085	-0.016884	0.0225825	0.0975767	-0.0561479	-0.307737
GSM1672344	-0.00328345	-0.199179	0.165086	-0.0323118	0.0171812	-0.035351	0.118646	0.157786	0.0523719	-0.0751815	0.00359489	-0.0894749	-0.0801359	-0.341326	-0.0814499	0.208245	0.0339762	0.073367	0.0197958	-0.0262308	-0.0422883	-0.0195587	-0.0880383	-0.275798
GSM1672345	0.172465	-0.151056	0.171017	0.0929378	-0.0655659	-0.0166	0.0925174	0.241458	-0.077889	-0.0125634	-0.0700729	0.00294072	-0.0571414	-0.276478	0.0806725	0.188742	-0.0129866	0.0560761	-0.0352862	0.0216475	0.0299158	-0.160674	-0.00231664	-0.341035
GSM1672346	0.0173147	-0.260784	0.130239	-0.195564	-0.176572	-0.0382843	-0.00114277	0.0245811	-0.126137	-0.188491	-0.0540916	-0.0580453	-0.0576887	-0.295214	-0.161931	0.191942	0.014372	0.0132322	-0.0959431	-0.124482	-0.116752	-0.169624	-0.00158182	-0.227065
GSM1672347	0.253243	-0.122289	0.12207	0.0448762	-0.0574486	-0.0580615	0.0786848	0.18728	-0.0989401	-0.0237185	-0.0950975	-0.115888	-0.0828826	-0.287157	0.0270346	0.235288	-0.00989241	0.0500269	0.00853016	-0.00667564	0.0300494	-0.241336	0.0183314	-0.287545
GSM1672348	0.0732478	-0.153887	0.145312	0.0616542	0.0183685	-0.0214615	0.10039	0.270182	-0.0703085	-0.0544741	-0.0722037	0.0125939	-0.0721747	-0.228522	0.0641655	0.175246	-0.0130299	0.0904961	0.0180418	0.041086	0.0671504	-0.0738226	-0.0245888	-0.282206
GSM1672349	0.0951919	-0.167804	0.135004	-0.0558627	-0.128411	-0.0103076	0.00921637	0.123692	-0.100603	-0.11167	-0.00487465	-0.0424903	-0.0535148	-0.263664	-0.0513636	0.177808	-0.022322	0.0154748	-0.0267953	-0.0227377	-0.0370222	-0.214141	0.0337541	-0.271818
GSM1672350	0.148469	-0.137506	0.197473	0.0822419	-0.0689461	-0.0399829	0.0614313	0.199406	-0.144679	-0.0354498	0.0046895	0.0312303	-0.0553017	-0.223085	0.0239673	0.19451	-0.0206946	0.050545	-0.0437938	0.021797	0.0517848	-0.0192971	-0.0360001	-0.434521
GSM1672351	0.169964	-0.166861	0.164236	0.040735	0.222918	0.0108982	0.142592	0.139473	-0.0817348	-0.0793017	-0.0976423	-0.0297337	-0.10659	-0.0589263	0.128897	0.216353	-0.0127015	0.0722925	0.0561516	-0.0135961	0.00829086	-0.0410204	-0.0577817	-0.282206
GSM1672352	0.131937	-0.220847	0.141578	-0.0204084	0.0176432	-0.0427191	0.0688886	0.156049	-0.0686048	-0.10588	-0.0678333	-0.0631471	-0.0601639	-0.325114	-0.0200938	0.196332	0.0208782	0.0708475	-0.0389769	-0.0278252	-0.0106477	-0.0571471	-0.0686607	-0.152218
GSM1672353	0.0870975	-0.205537	0.141842	-0.0480338	-0.115885	-0.0410641	0.00413262	0.109567	-0.169587	-0.133021	-0.0503482	-0.0628329	-0.0634955	-0.333074	-0.0911258	0.188733	-0.0235205	0.0197487	-0.0484598	-0.0606522	-0.0326732	-0.0453046	-0.0176478	-0.24085
GSM1672354	0.0256072	-0.103336	0.165855	0.0418865	0.134327	-0.0250823	0.0950201	0.143536	0.0098326	-0.0609254	-0.000567618	-0.0703951	-0.035625	-0.311523	0.00531234	0.220508	0.0118409	0.0454038	0.0567397	-0.044875	-0.0162125	0.0306264	-0.0641801	-0.287545
GSM1672355	0.203665	-0.13181	0.132122	0.0643183	-0.00888675	-0.0272284	0.0996055	0.15588	-0.0979393	0.00351136	-0.0823578	0.0231133	-0.0294102	-0.0740705	0.0315653	0.202138	0.0043316	0.0172353	-0.0171247	0.204632	0.0256448	-0.0703913	-0.0266807	-0.326376
GSM1672356	0.243837	-0.122717	0.115949	-0.00854858	-0.140599	-0.0192912	0.0289585	0.0581058	-0.108347	-0.0769792	-0.0375455	-0.0733555	-0.126066	-0.31696	0.0198752	0.216274	-0.00268523	0.0123092	-0.0570776	0.0818638	0.0298375	-0.0111355	0.00951368	-0.265023
GSM1672357	0.0253385	-0.200596	0.149157	-0.10837	-0.0794802	0.0173964	0.0805436	0.150716	-0.0572199	-0.0978357	-0.15748	-0.0720366	-0.0621844	-0.271818	-0.129757	0.186867	-0.00441012	0.0511023	-0.0145164	-0.0284231	-0.00698527	-0.140428	-0.0448319	-0.325114
GSM1672358	0.155507	-0.0985211	0.153088	0.00650156	-0.00873874	-0.0596775	0.0173877	0.107667	-0.148167	-0.180113	-0.0289515	-0.0105916	-0.0507223	-0.337152	0.0788966	0.225022	0.0226207	0.086559	0.0262186	-0.0267922	-0.033863	-0.111687	-0.0216359	-0.241627
GSM1672359	0.0813872	-0.191584	0.155478	-0.0521186	0.0497439	-0.0166026	0.0319473	0.146274	-0.0247534	-0.0462324	-0.0742351	-0.0585478	-0.0547402	-0.295117	-0.0541636	0.209262	0.0198203	0.0110314	0.0428581	-0.0892716	-0.0283076	-0.10103	-0.119219	-0.244442
GSM1672360	0.00791746	-0.211509	0.143016	-0.058437	-0.132918	-0.0434358	0.0461581	0.210241	-0.0902584	-0.0461829	-0.145509	-0.0446133	-0.0763055	-0.349578	-0.111689	0.169427	-0.00742733	0.0264392	-0.022343	-0.0685954	-0.00103272	-0.0454571	-0.0666152	-0.225997
GSM1672361	0.215665	-0.148252	0.146633	-0.0282684	0.0700748	-0.0136304	0.0874755	0.190078	-0.0561135	-0.075401	-0.0404473	-0.0649989	-0.0768042	-0.31861	0.0163763	0.196262	0.0091876	0.0559145	-0.00501395	0.00875306	0.0108996	-0.131855	-0.0723041	-0.247549
GSM1672362	-0.0903607	-0.225275	0.113201	-0.118087	-0.149073	0.000249776	-0.0488897	0.0756321	-0.0870304	-0.0575603	-0.0697337	-0.0620166	-0.0429651	-0.279682	-0.141665	0.186679	0.0193621	-0.00143169	-0.0467303	-0.0902394	-0.102532	-0.21822	0.00677774	-0.302107
GSM1672363	0.0674263	-0.154053	0.159841	-0.0235315	-0.0537091	-0.00312627	0.0653402	0.191023	-0.0337581	-0.0728304	-0.0140748	-0.0503413	-0.0625102	-0.229492	-0.0687978	0.194105	0.00848271	0.0365245	-0.0509634	0.0886265	0.032517	-0.0654439	-0.0947787	-0.315212
GSM1672364	0.0403514	-0.175561	0.14075	-0.0748598	0.106759	-0.0388094	0.106315	0.217939	-0.0733038	-0.0862883	-0.108033	-0.0792225	-0.0746791	-0.362004	-0.0747278	0.198935	-0.048418	0.0357512	0.00247493	-0.0846098	0.0135526	-0.131369	-0.0368105	-0.223668
GSM1672365	0.182787	-0.222872	0.158942	-0.0123766	-0.141085	0.0158368	0.0932683	0.121418	-0.0363606	-0.0907327	-0.118373	-0.00711232	-0.039552	-0.291525	-0.0698221	0.212686	0.0107757	-0.0152399	-0.0214329	-0.0208745	0.00490309	-0.112283	-0.0146652	-0.227357
GSM1672366	0.0334303	-0.232556	0.153398	-0.0174688	-0.0274418	-0.0304713	0.124138	0.175427	0.0324118	-0.141256	-0.15571	-0.0195004	-0.0654672	-0.22823	-0.0334203	0.221495	-0.0321773	0.0611695	-0.00251293	0.0336188	0.0121596	-0.088261	-0.035707	-0.279487
GSM1672367	0.287365	-0.129186	0.211914	0.220246	0.145073	-0.0161748	0.14264	0.279822	-0.0621242	0.0168435	0.0086016	0.0185538	-0.0614214	-0.0275701	0.179224	0.202567	0.0220741	0.0953508	-0.0119343	0.0461305	0.0529671	-0.0727251	-0.0576198	-0.297059
GSM1672368	0.0193826	-0.297048	0.134903	-0.185325	0.0462053	-0.0163122	0.0366906	0.0565347	-0.0859017	-0.135986	-0.0213512	-0.115062	-0.0427725	-0.221823	-0.16375	0.184647	-0.00102236	0.0100855	-0.0905473	-0.0448016	-0.0362974	0.00394194	-0.0542103	-0.255315
GSM1672369	0.100059	-0.238893	0.179718	0.050335	0.0250777	-0.0292758	0.134572	0.181895	-0.00377414	-0.0271425	-0.0236121	-0.0370011	-0.0758275	-0.283273	0.00474787	0.181085	0.0189934	0.0551395	-0.0505047	0.0113693	0.0517965	-0.139381	-0.0820471	-0.413067
GSM1672370	0.12126	-0.250173	0.176601	0.0247088	-0.0738966	-0.0416453	0.0499266	0.0931168	-0.090297	-0.0781275	-0.0286358	-0.0462288	-0.0680495	-0.308708	-0.0409963	0.202094	0.0224642	0.0475017	-0.0383168	-0.0398207	-0.00161622	-0.0515339	-0.0445056	-0.262887
GSM1672371	-0.0166776	-0.19939	0.165281	-0.0770717	0.011983	-0.000895302	0.127083	0.187276	0.0192113	-0.0676379	-0.092701	-0.104243	-0.0612632	-0.307931	-0.0892308	0.200683	0.00375647	0.0560705	0.00648487	0.00911884	0.0322129	-0.179644	-0.0936752	-0.296476
GSM1672372	0.172567	-0.0465292	0.20323	0.0955963	0.0290582	-0.0254542	0.154881	0.265183	0.0148455	-0.0667272	-0.0612252	-0.0725486	-0.0773809	-0.328803	0.128788	0.212731	0.0347675	0.0629367	-0.00091809	0.0353747	0.0356656	-0.091891	-0.0567856	-0.376274
GSM1672373	0.0418036	-0.0133194	0.213631	0.0646693	0.0620041	0.00482696	0.0868677	0.148856	-0.0294673	-0.068657	-0.0867059	-0.0830533	-0.0579265	-0.084652	0.123347	0.195186	0.0412585	0.0838691	0.070555	0.083964	0.00240971	-0.164614	-0.0817567	-0.274342
GSM1672374	0.142485	-0.15133	0.137079	0.0233396	0.049534	-0.0300512	0.122303	0.246716	-0.0384781	-0.0179443	-0.116975	0.0326449	-0.0759892	-0.423551	-0.00535848	0.170851	-0.0322114	0.0637683	-0.0510305	0.0171039	0.0324392	-0.194943	0.00273829	-0.448306
GSM1672375	0.16232	-0.186142	0.137699	0.0396214	-0.018889	-0.0188201	0.0407131	0.131269	-0.0870698	-0.0876012	-0.12506	-0.0339785	-0.0588566	-0.301039	-0.0500475	0.166959	0.0276703	0.0640508	0.017189	-0.0606539	0.00610067	-0.11581	-0.0254494	-0.298126
GSM1672376	0.179917	-0.144643	0.183721	0.118625	-0.00778866	-0.0491535	0.0673621	0.222463	-0.119673	-0.0398198	-0.0645092	0.0232773	-0.06401	-0.26444	0.0479925	0.238015	-0.013589	0.024544	-0.0470522	-0.0057398	-0.0037466	-0.0402608	-0.0382599	-0.234734
GSM1672377	-0.0595991	-0.262867	0.108406	-0.142928	-0.194492	-0.026021	0.0121406	0.0597237	-0.120386	-0.150097	0.0143983	-0.173521	-0.0744737	-0.411805	-0.176958	0.196858	-0.0211335	-0.0287329	-0.0924513	-0.0875382	-0.132101	-0.0994718	-0.00348293	-0.267159
GSM1672378	0.0755134	-0.0927134	0.136957	-0.0393319	-0.0595463	-0.0191725	0.0942829	0.203963	-0.0347752	0.0256745	-0.073222	-0.0271948	-0.0852539	-0.270556	0.00907452	0.18264	-0.0185544	0.0136632	-0.00208996	-0.0139574	-0.00572361	-0.0805826	-0.0148781	-0.273954
GSM1672379	0.180938	-0.177781	0.192858	0.076007	-0.0350823	0.00961548	0.0892448	0.201554	-0.0378449	-0.0512597	-0.10943	-0.0650692	-0.0516206	-0.0785361	0.0514991	0.208006	0.0463951	0.0474947	0.0348454	0.0107375	0.0748335	-0.131092	-0.0655904	-0.259781
GSM1672380	0.148549	-0.135415	0.13308	0.03032	0.0428434	-0.0258211	0.101433	0.181474	-0.0648703	0.0803768	-0.0765356	0.0290171	-0.0778461	-0.286089	0.0217499	0.209983	-0.0243114	-0.0077782	-0.04195	0.0025678	0.010133	-0.186254	0.0100797	-0.261625
GSM1672381	0.106399	-0.19832	0.162063	-0.00962718	-0.0504664	0.00907527	0.0525346	0.125539	-0.0193919	-0.053277	-0.0236454	-0.0682619	-0.0651397	-0.273566	-0.0279461	0.184962	0.00911742	0.0586372	-0.0321322	0.0181764	0.0126562	0.0516245	-0.0584487	-0.283856
GSM1672382	0.0187586	-0.144969	0.153596	-0.0201829	0.163594	-0.0229241	0.132026	0.207695	-0.0196526	-0.0980031	-0.0552231	-0.131385	-0.0714377	-0.100476	0.0374146	0.180028	0.0384909	0.0837118	0.0357232	0.0321703	-0.00819555	0.0203033	-0.0801099	-0.289875
GSM1672383	0.200367	-0.0479561	0.171481	0.0953324	0.0174822	-0.0926584	0.0273767	0.200188	-0.0854213	-0.0403389	-0.0186709	0.0358957	-0.0808024	-0.243666	0.101282	0.204138	0.023087	0.0250869	-0.052689	0.0181109	0.0323775	-0.0562709	-0.00828701	-0.283565
GSM1672384	0.0507676	-0.195858	0.146893	0.0943072	0.0702274	-0.0347078	0.142132	0.218559	-0.0486219	-0.0824357	-0.0477702	-0.0862764	-0.0605104	0.136006	0.0739756	0.191873	0.0298972	0.0365209	-0.0172031	0.0649245	0.00314065	-0.099426	-0.0846129	-0.236288
GSM1672385	0.152095	-0.100703	0.150897	0.103489	-0.0403213	-0.0460168	0.0697881	0.191003	-0.125179	-0.0598304	-0.0617985	-0.0188727	-0.0693293	-0.266188	0.0340573	0.180639	-0.00340392	0.0278224	-0.037193	-0.0186936	0.0107025	-0.119487	0.00482103	-0.265799
GSM1672386	0.079482	-0.215195	0.168548	-0.00332354	-0.065728	-0.00847093	0.0957171	0.249987	-0.0593822	-0.0165985	-0.161798	-0.0455352	-0.0540781	-0.351908	-0.0383546	0.187008	0.00301144	0.0418802	0.0183362	0.0378812	0.0775534	-0.0545343	-0.0480788	-0.345209
GSM1672387	0.113067	-0.205314	0.15848	-0.124971	0.0359636	-0.0124449	0.117787	0.227132	0.00312358	-0.0982662	0.00751095	-0.0971784	-0.0643666	-0.335113	-0.0562107	0.186836	-0.0281881	0.0852649	-0.0148433	0.0118127	-0.0109397	-0.142255	-0.033749	-0.259975
GSM1672388	0.22876	-0.188251	0.161581	0.0640089	0.0574237	-0.0286468	0.0573207	0.214863	-0.125682	-0.0604763	-0.0981798	0.00379432	-0.0560674	-0.147461	-0.0540015	0.195856	-0.0226885	0.00796188	-0.030259	-0.047227	0.0401423	-0.0323137	-0.0333745	-0.276575
GSM1672390	0.0435342	-0.196228	0.114605	-0.11784	0.0352752	0.0131513	-0.0140245	0.111382	-0.162155	-0.126412	-0.131131	-0.0743326	-0.0379308	-0.300456	-0.154819	0.20436	0.0407024	0.0533259	-0.0121855	0.0400088	-0.00966534	-0.13299	-0.0515347	-0.315795
GSM1672391	-0.00537637	-0.00909547	0.180659	0.0938032	-0.010134	-0.0355209	0.12499	0.209936	-0.0033063	-0.0190932	-0.0620371	0.016195	-0.047298	-0.323464	0.0881956	0.171104	0.00594172	0.0619554	0.000549427	0.116774	0.00771061	0.00851933	-0.0737065	-0.245122
GSM1672392	0.13105	-0.158672	0.162449	-0.0664423	-0.0328425	-0.0273394	0.0558008	0.189902	-0.0546463	-0.00684999	-0.133887	-0.000778236	-0.0527002	-0.279876	-0.0603892	0.180258	-0.0180919	0.0301624	-0.00323448	-0.0631002	0.0444727	-0.107202	-0.0465229	-0.273469
GSM1672393	0.165719	-0.13061	0.152294	0.0747688	-0.0453371	-0.0206984	0.046263	0.0965265	-0.0638335	-0.143917	-0.0671384	-0.040544	-0.0745866	-0.291137	0.0655399	0.209987	-0.0381619	0.0384731	-0.0132711	-0.0177007	0.0223296	-0.10785	-0.0377221	-0.342103
GSM1672394	0.0732129	-0.188103	0.18708	-0.0714525	0.136921	0.00242256	0.145932	0.242374	0.0183835	-0.0916738	0.0140271	-0.0489724	-0.0728749	0.00300942	-0.03751	0.201022	-0.0068049	0.0538974	-0.00285092	0.00558362	0.00351815	-0.0859039	-0.0832538	-0.279487
GSM1672395	0.0755375	-0.181102	0.108473	-0.0794588	-0.114375	-0.0207446	0.134127	0.21736	-0.0547021	-0.0403086	-0.149834	-0.0282552	-0.0523048	-0.276381	-0.102278	0.176725	-0.051156	0.0175617	-0.0505819	-0.0218858	0.000944298	-0.154133	-0.0322458	-0.316668
GSM1672396	0.217416	-0.124605	0.157707	0.0505592	0.0707241	-0.025239	0.14159	0.233604	-0.0645622	-0.0157597	-0.0746869	0.0153973	-0.0530235	0.0540724	0.0482929	0.200793	-0.0268921	0.0480872	0.00413928	0.0187465	0.0282888	-0.0736755	-0.0766772	-0.23124
GSM1672397	0.156587	-0.13817	0.1651	0.034143	-0.00388387	-0.0484208	0.0612874	0.188695	-0.11024	-0.0221141	0.0229133	-0.0384191	-0.06124	-0.370547	0.0387233	0.171039	-0.00473697	0.0157109	-0.0513989	0.0136854	0.0187709	-0.108879	-0.0603912	-0.290748
GSM1672398	0.0139875	-0.238635	0.156406	-0.155134	-0.0440602	-0.0351324	0.0423326	0.105951	-0.0530815	-0.117083	-0.0116641	-0.160594	-0.0493301	-0.29735	-0.141689	0.186882	-2.51e-05	0.01268	0.0374867	-0.0561558	-0.0782674	0.0800694	-0.0933245	-0.30997
GSM1672399	0.149224	-0.239514	0.131027	-4.75e-05	0.105638	-0.0317827	0.077249	0.198876	-0.0948606	-0.0757093	-0.0391439	0.0274424	-0.0443717	-0.226871	-0.0322023	0.171726	-0.0442004	0.058478	-0.0153192	-0.0312677	0.0860007	-0.0715276	-0.0486515	-0.226677
GSM1672400	0.260574	-0.12035	0.169858	0.133171	0.0782376	-0.0308438	0.116387	0.177323	-0.0887123	-0.115323	-0.0241337	0.00680067	-0.0837357	-0.272692	0.176494	0.216874	0.0215168	0.0657685	0.0464879	0.01812	0.0132357	-0.00365423	-0.0829022	-0.23221
GSM1672401	0.231703	-0.158023	0.170439	0.142257	0.0377875	-0.0418844	0.0490443	0.259882	-0.114768	0.0452271	-0.0519906	0.0719629	-0.0372676	-0.241821	0.105589	0.21306	-0.000900713	0.054884	-0.0549107	0.0351375	0.0574565	-0.102734	-0.0221951	-0.27376
GSM1672402	0.287057	-0.225885	0.134788	0.104653	0.0307226	-0.0500333	0.0581653	0.168212	-0.099481	-0.0331693	-0.0604597	0.0208707	-0.0435887	-0.0212601	0.0301657	0.202443	-0.0136089	0.00521989	-0.0464278	-0.0339336	0.0622955	0.0350386	-0.00701482	-0.272207
GSM1672403	0.243139	0.0276761	0.183164	0.0919531	-0.0243464	-0.0349131	0.104113	0.218566	-0.0446354	-0.00953367	-0.11877	-0.0249257	-0.0467541	-0.235511	0.110755	0.198024	0.0150052	0.0630253	0.016741	0.0295087	0.0360145	-0.0980734	-0.0511552	-0.232113
GSM1672404	0.232964	0.0297691	0.180295	0.205581	-0.00667636	-0.0457815	0.0523781	0.119009	-0.060837	-0.00558745	-0.00953968	0.0245293	-0.0236317	0.0720318	0.184293	0.223341	0.0363523	0.0512775	-0.0245929	0.0548429	0.065531	-0.101774	-0.0456707	-0.210465
GSM1672405	0.126189	-0.175919	0.161197	-0.0343705	0.00638038	-0.0187616	0.12273	0.231349	0.00311569	-0.0576131	-0.0740692	-0.0981052	-0.0722155	-0.199981	0.0200908	0.205101	0.0400846	0.000435018	-0.000171371	-0.010729	0.0133884	-0.151817	-0.0714404	-0.258422
GSM1672406	0.167483	-0.00577947	0.170463	0.105371	0.0627549	0.00360326	0.144919	0.204717	-0.0158489	-0.0515744	-0.081084	-0.0493205	-0.0662142	0.139404	0.133069	0.229091	0.0236871	0.064714	0.0603487	0.025349	0.0546628	-0.210443	-0.0580033	-0.209494
GSM1672407	0.170529	-0.137096	0.142513	-0.0102477	-0.0379518	-0.0463463	0.0314527	0.182299	0.00879145	0.0527017	-0.0178179	-0.0858563	-0.0649974	-0.174352	0.016082	0.205956	-0.0306635	0.0137217	-0.0405461	-0.0404941	0.0437713	-0.190712	-0.0495377	-0.262596
GSM1672408	0.194431	-0.244966	0.1048	-0.0950609	-0.107316	-0.0478451	0.0534283	0.0437876	-0.0556875	-0.128955	-0.124351	-0.0484047	-0.0662066	-0.320066	-0.111786	0.167517	-0.0172113	-0.0550442	-0.0569987	-0.0984967	-0.0147279	-0.152318	-0.0248326	-0.295894
GSM1672409	0.110849	-0.191266	0.142084	-0.102677	0.0665528	-0.0152588	0.109936	0.230221	-0.0156596	-0.0415724	0.0133191	-0.118385	-0.0701479	-0.259295	-0.0278659	0.177008	0.00397575	0.00657919	-0.0305934	-0.0156457	0.0156178	-0.0342858	-0.078692	-0.205708
GSM1672410	0.163899	-0.145503	0.17563	0.099557	-0.0102247	-0.0351491	0.119931	0.294075	-0.0341858	-0.0489013	-0.00118945	-0.0188755	-0.0403544	-0.119988	0.106706	0.214063	0.00591592	0.0281928	-0.0418249	0.0833262	0.0234337	-0.209376	-0.0535036	-0.211339
GSM1672411	0.206558	-0.208405	0.131517	0.124186	-0.0489839	-0.0384843	0.0782368	0.115937	-0.157594	-0.0667062	-0.0634306	0.00213519	-0.0579793	-0.0756237	0.04907	0.210574	-0.0144185	-0.00577118	-0.0313349	0.0236167	0.0636587	-0.0968912	0.0156803	-0.196
GSM1672412	0.206607	-0.12723	0.19246	0.083213	-0.0585746	-0.00739924	0.10679	0.189628	-0.0235183	0.0441181	-0.00515299	0.0136284	-0.0620173	-0.0823221	0.0812236	0.194402	-0.0164704	0.0459165	-0.00367127	0.151155	0.0814662	-0.106338	-0.0168179	-0.290943
GSM1672413	0.091492	-0.168091	0.175381	0.0298871	0.148474	-0.0100889	0.163303	0.20787	-0.012862	0.00135802	0.00488744	-0.0626822	-0.0590822	-0.174934	0.0815376	0.197059	-0.00844878	0.0433018	-0.0447414	0.0723869	0.0348482	-0.155607	-0.0864655	-0.249296
GSM1672414	0.205938	-0.147866	0.156505	0.0447722	-0.126353	-0.0575127	0.0882687	0.171267	-0.101142	-0.0162063	-0.011884	0.00284029	-0.037813	-0.255024	0.00100672	0.194405	-0.0330854	-0.00941885	-0.0621125	0.0235117	0.0485383	-0.0584984	0.0462403	-0.208718
GSM1672415	0.261538	-0.14151	0.161279	0.0903872	-0.0984493	-0.0425301	0.0586999	0.191023	-0.0967761	-0.036015	-0.0419258	-0.00990735	-0.0830207	-0.209785	0.0638966	0.224553	-0.0103324	0.034921	-0.0274092	-0.0160298	0.0399234	-0.106595	-0.0340239	-0.306572
GSM1672416	0.260158	-0.215226	0.146219	0.0276451	-0.0796471	-0.0481249	0.0452775	0.19884	-0.161545	0.0607359	-0.0982257	0.0227757	-0.0797924	-0.241821	-0.00619681	0.184039	-0.0363379	0.0432191	-0.050977	0.0187481	0.0363264	-0.0426636	-0.0329969	-0.207844
GSM1672417	0.237551	-0.193657	0.149143	0.0554376	0.0507317	-0.0495614	0.0916955	0.219021	-0.0782346	-0.0464031	-0.0303918	-0.00215645	-0.0357514	-0.0781478	0.0663827	0.182306	-0.0284175	0.0258662	-0.0180917	0.0636335	0.0738494	-0.0523027	-0.0253628	-0.200854
GSM1672418	0.116528	-0.180035	0.143043	-0.0544368	0.0462427	-0.0434935	0.0363802	0.152712	-0.102596	-0.0569796	-0.0296334	-0.0288719	-0.0503095	0.0230075	-0.0422901	0.178545	-0.0778146	0.00174897	-0.0587361	-0.0102069	0.0359476	-0.200483	-0.0258123	-0.370061
GSM1672419	0.264851	-0.070987	0.147081	0.0840515	0.140742	-0.0333733	0.0793997	0.260793	-0.0939155	-0.0357121	-0.091119	-0.00253626	-0.0588531	0.0787302	0.0829268	0.1987	0.000178814	0.0302352	-0.0154249	0.00994568	0.0355575	-0.148063	-0.0205779	-0.294826
GSM1672420	0.129312	-0.138637	0.141035	0.0792607	0.0465939	-0.0135255	0.0878765	0.276925	-0.137712	-0.0456188	-0.134125	-0.0140187	-0.0792948	-0.150859	0.0639819	0.216875	-0.0164404	0.0373203	0.014708	0.0183602	0.0429998	-0.0923645	-0.0316152	-0.28706
GSM1672421	0.15932	-0.213448	0.127868	0.0285468	0.00460396	-0.0382826	0.0395806	0.130123	-0.102401	-0.0387426	-0.0750116	-0.0027342	-0.0473705	-0.29434	-0.0315398	0.188091	-0.0287598	-0.00487381	-0.0554675	0.0419055	-0.00434224	-0.209579	0.0150017	-0.33919
GSM1672422	0.244948	-0.265728	0.13171	-0.0600403	-0.0930107	-0.0562933	0.0405281	0.178498	-0.133587	-0.0514122	-0.0755045	0.00489825	-0.0548116	-0.360742	-0.121354	0.153967	-0.0625376	0.0525205	-0.0730792	-0.0487654	0.034599	-0.0152191	-0.0307658	-0.467042
GSM1672423	0.280268	-0.0610732	0.173447	0.181869	-0.00663198	-0.0514099	-0.00072015	0.0633256	-0.152644	-0.0609829	0.0342405	0.087636	-0.0393983	-0.0883409	0.120901	0.207411	0.0297667	0.0800122	-0.00434107	-0.00452556	0.0157664	-0.121546	-0.0330615	-0.432774
GSM1672424	0.184432	-0.0733047	0.198174	0.144395	-0.00161274	-0.00943115	0.108888	0.235658	-0.037029	-0.0473132	0.00796148	-0.00437	-0.0162132	-0.225512	0.147799	0.203467	0.015094	0.0951145	-0.022794	0.0451774	0.032825	0.046048	-0.0812033	-0.243957
GSM1672425	0.191298	-0.203567	0.191264	0.0102406	0.0814517	-0.0160599	0.0904671	0.241918	-0.000889099	-0.0451573	-0.0393764	-0.0979689	-0.0379161	-0.0969809	-0.0104708	0.186067	0.0161985	0.107049	0.00787526	-0.0158928	0.054321	0.0468405	-0.0985358	-0.261819
GSM1672426	0.111663	-0.210992	0.155599	0.132523	-0.00606318	-0.0741166	0.0620787	0.0550054	-0.129377	-0.0757529	0.0226381	0.0425028	-0.042197	-0.263372	0.0496028	0.177215	-0.0321461	0.051042	-0.0408635	0.0138244	-0.0574923	0.0134713	0.0103074	-0.259489
GSM1672427	0.0722789	-0.121796	0.199605	0.105314	0.0618268	0.00449266	0.171473	0.202204	-0.00525492	-0.019794	0.00569725	0.00320923	-0.0265689	-0.261819	0.145189	0.216674	0.036292	0.10949	0.0374	0.0347988	0.0669235	-0.00521749	-0.0830846	-0.380643
GSM1672428	0.136702	-0.183636	0.196002	0.0139496	-0.0819198	-0.0369481	0.0867496	0.254547	-0.0151033	-0.0209599	-0.0121099	-0.104253	-0.0478905	-0.310358	-0.050163	0.185987	0.0153242	0.0684224	0.0190619	-0.0187783	0.0214178	-0.0423603	-0.103001	-0.502475
GSM1672429	0.1008	-0.0885278	0.180123	-0.0483659	0.0269091	-0.00322677	0.102158	0.177776	-0.0630054	-0.0344742	0.0161666	-0.0958817	-0.016478	-0.271915	-0.0941181	0.178311	0.00753101	0.0315749	0.000109065	-0.110089	0.042682	-0.0757377	-0.0822604	-0.437822
GSM1672430	0.167192	-0.178423	0.174436	0.0287883	-0.0435264	0.00246949	0.104229	0.243119	-0.093939	-0.0922489	-0.0349703	-0.0350374	-0.0480776	-0.400641	0.056406	0.220671	0.0014149	0.0845823	0.00491998	-0.0261481	0.0375296	-0.0236428	-0.0721945	-0.324337
GSM1672431	0.121827	-0.201383	0.177925	-0.0654967	-0.0794126	0.00859471	0.0206811	0.116588	-0.103569	-0.0947054	-0.00749613	-0.144863	-0.0298183	-0.287836	-0.0993625	0.209344	0.0270886	0.0752458	-0.0824602	-0.0909854	0.0374908	0.0161781	-0.115374	-0.273177
GSM1672432	0.233289	-0.23002	0.114704	-0.117618	-0.132647	0.0126513	0.0222315	0.123266	-0.155713	-0.170177	-0.188081	-0.120128	-0.0148465	-0.261043	-0.124115	0.161823	-0.0354209	0.0497862	-0.0492333	-0.115952	-0.0397058	-0.157225	0.0324867	-0.414911
GSM1672433	0.122655	-0.259387	0.138247	-0.0782051	-0.0764146	-0.0404214	-0.0226879	0.0687518	-0.160511	-0.0811988	-0.0370613	-0.0699457	-0.0344414	-0.263858	-0.116773	0.160903	-0.0375187	0.0369079	-0.0568948	-0.0597093	0.0128322	-0.069721	0.013224	-0.23988
GSM1672434	0.170547	-0.279148	0.153494	0.0990028	-0.187909	-0.0934975	-0.00136367	0.141634	-0.174718	0.0242078	-0.0176119	0.0439204	-0.0169461	-0.27211	0.00311689	0.173025	-0.0365203	0.0745757	-0.0965648	-0.0304802	0.0253317	-0.103597	0.0543311	-0.237938
GSM1672435	0.147828	-0.25333	0.149497	0.105784	0.0198151	-0.0556455	0.0867621	0.141715	-0.128617	-0.0608586	-0.102858	-0.0154872	-0.0666121	-0.340647	0.0508304	0.207591	-0.00080728	0.100699	-0.0530101	0.0130329	0.0147428	0.0475639	-0.0180911	-0.410349
GSM1672436	0.210283	-0.179838	0.136342	-0.0976675	0.0177733	-0.0514559	0.0480222	0.164573	-0.133689	-0.0984664	0.0076808	-0.0586359	-0.0358907	-0.264537	-0.11791	0.179843	-0.0233817	0.0586606	-0.0101647	-0.097725	0.0455031	-0.0331839	-0.0327477	-0.321716
GSM1672437	0.0172573	-0.142963	0.191471	0.175151	-0.153432	-0.0484909	0.00892392	0.0178712	-0.0919222	-0.10675	0.049488	0.0666399	-0.0301699	-0.283759	0.0394262	0.165458	0.0197283	0.0722669	-0.0459518	0.0165057	-0.0304007	-0.0600411	0.0157104	-0.290748
GSM1672438	0.153025	-0.183271	0.142349	0.0121817	-0.147324	-0.0469272	0.0827745	0.154696	-0.102203	-0.0701078	-0.0154211	0.0148241	-0.0221165	-0.337443	-0.0245555	0.18938	-0.0291308	0.0576644	-0.0491033	-0.0196577	-0.00228778	-0.044355	-0.00210018	-0.311329
GSM1672439	-0.0493204	-0.224909	0.125726	-0.117771	-0.132074	0.00327466	0.0348947	0.0419746	-0.0816265	-0.0251142	-0.0358533	-0.0793797	-0.0616345	-0.310164	-0.154256	0.157218	-0.0314984	0.0363627	-0.0859023	-0.0530134	-0.0157497	0.00887606	-0.0617673	-0.236773
GSM1672440	0.0429091	-0.15982	0.137868	-0.00751131	-0.136034	-0.0349588	-0.0214156	0.0629097	-0.172957	-0.0848294	-0.0521289	-0.0157492	-0.0545613	-0.255218	-0.0665363	0.180391	-0.0201135	0.047765	-0.101742	-0.0275406	-0.0521025	-0.0659211	-0.0303461	-0.37375
GSM1672441	0.177299	-0.248878	0.156024	-0.0329248	-0.108151	-0.0181228	0.0816407	0.168767	-0.0488542	-0.109215	-0.0155825	-0.174496	-0.0113669	-0.235511	-0.0241899	0.186202	0.00934408	0.0580558	-0.0268259	-0.0202911	-0.0254294	-0.106013	-0.0321352	-0.256965
GSM1672442	0.221383	-0.0736135	0.182295	0.0926711	-0.0664809	-0.0422291	0.0429208	0.150462	-0.0689455	0.0210675	0.00220201	0.0323516	0.00358619	-0.317154	0.10839	0.185164	0.00690569	0.0630431	-0.0457935	0.0445759	0.0322663	-0.126728	-0.0450568	-0.230948
GSM1672443	-0.00751404	-0.228634	0.149478	-0.0251398	-0.0491333	0.0369729	0.0622905	0.11033	-0.0325025	-0.0187328	0.0684025	-0.105578	-0.0486967	0.0531987	-0.0391075	0.185184	0.00679041	0.0999762	-0.0262838	0.0248838	0.0281923	-0.0851432	-0.0843072	-0.25182
GSM1672444	0.0694412	-0.154722	0.147171	0.0607875	-0.17475	0.00396191	0.0217941	0.0403669	-0.140314	-0.122205	0.0380582	-0.0581037	-0.0416594	-0.385399	0.0231768	0.201451	-0.00244408	0.116365	-0.0768284	-0.0466234	-0.0511339	-0.189373	0.00220236	-0.318222
GSM1672445	0.00484268	-0.218031	0.143158	-0.125652	-0.081904	-0.00530447	0.0427672	0.121014	-0.0320994	-0.0803309	-0.0686201	-0.125003	-0.00965291	-0.168819	-0.0702055	0.200653	0.0199582	0.0647598	-0.0681772	-0.00941047	0.0385662	0.0398868	-0.0299242	-0.439569
GSM1672446	0.00550107	-0.167231	0.166367	0.0252446	-0.0600495	-0.0457909	0.0634134	0.178776	-0.105001	-0.0863658	0.0308302	0.00584481	-0.0792242	-0.0863994	0.0503772	0.195119	-0.00263873	0.0839622	0.00818194	-0.00290327	-0.0392284	-0.126199	-0.0472537	-0.325308
GSM1672447	0.0922303	-0.278962	0.142973	-0.0933009	0.0153442	-0.0187152	0.00744941	0.150423	-0.164172	-0.0883572	-0.0321165	-0.00108179	-0.0623116	-0.248811	-0.0671439	0.14169	-0.0210089	0.0830689	-0.0556776	-0.0604549	0.0163447	-0.120175	0.0111287	-0.35016
GSM1672448	0.129395	-0.196099	0.203953	0.00759526	0.0165798	-0.0267266	0.111591	0.203325	-0.0373107	-0.0388818	0.0120081	-0.0625611	-0.0419304	-0.262887	-0.00527663	0.166927	0.0163446	0.0440385	-0.037595	-0.0649761	0.0333858	-0.0772114	-0.0763678	-0.458111
GSM1672449	0.16276	0.075027	0.208434	0.166998	-0.0304035	-0.0378561	0.100284	0.210451	-0.101548	0.0120975	0.00510332	0.0400041	-0.0331512	-0.238812	0.264333	0.228528	0.0483873	0.104291	0.00568978	0.0732553	0.0595829	-0.115813	-0.0496234	-0.191146
GSM1672450	0.0620327	-0.118612	0.19	0.115428	-0.0341728	-0.0391095	0.0628722	0.148919	-0.130354	-0.11971	-0.0633935	-0.120925	-0.0549324	-0.385691	0.139596	0.214752	0.00686973	0.0458829	-0.0255422	0.0498297	0.0391954	-0.0145078	-0.0102281	-0.24619
GSM1672451	0.143487	-0.203903	0.1979	-0.0384576	0.0319281	-0.0162009	0.0528714	0.178767	-0.0712516	-0.101692	-0.0170148	-0.0743138	-0.0284133	-0.253179	0.0220035	0.176808	0.0361765	0.0776596	-0.0530995	-0.0525204	0.00902402	0.0688939	-0.140627	-0.183186
GSM1672452	0.000118616	-0.247472	0.0937454	-0.176833	-0.0697867	-0.0256371	-0.0309346	0.11636	-0.178554	-0.0878511	0.028637	-0.101587	-0.0132338	-0.270459	-0.135656	0.180909	-0.0263399	0.0714804	-0.0471614	-0.0576328	-0.0222175	0.0267704	-0.00533442	-0.275216
GSM1672453	0.122574	-0.263911	0.162445	-0.115806	0.0487545	-0.0252102	0.14791	0.256024	-0.0840456	-0.0661036	-0.00160807	-0.0430449	-0.0332444	-0.339967	-0.0980231	0.155628	-0.032632	0.0934605	-0.0648868	-0.0136349	0.0626206	-0.0508074	-0.0602397	-0.193088
GSM1672454	0.0574689	-0.229175	0.12508	-0.096017	-0.18308	-0.00747123	0.0532105	0.127589	-0.128558	-0.0919614	-0.0159779	-0.100342	-0.0714125	-0.252306	-0.0847093	0.229588	-0.0278842	0.0291073	-0.0707912	-0.0471945	0.00194011	-0.154419	-0.0216545	-0.429958
GSM1672455	-0.018709	-0.187895	0.194245	-0.00659755	-0.154903	0.00339895	-0.0599497	0.0940512	-0.0138732	-0.164178	0.0636066	-0.0271398	-0.0101445	-0.387826	-0.0636653	0.156198	-0.0492871	0.0399321	-0.0128189	-0.0617697	-0.0144106	-0.178656	0.0757775	-0.32327
GSM1672456	0.15333	-0.157121	0.152444	-0.010611	-0.122845	-0.0345459	0.018661	0.0823918	-0.11785	-0.10185	-0.0370617	0.0158924	-0.00640741	-0.287157	-0.00296686	0.174996	-0.0283182	0.0217834	-0.031079	-0.0204904	0.0122576	0.01461	-0.0371533	-0.284633
GSM1672457	0.186866	-0.263381	0.138971	-0.0434782	-0.0851019	-0.0236835	0.0334606	0.108649	-0.060729	-0.0891639	0.0210211	-0.0630283	-0.058982	-0.32492	-0.0983902	0.200156	-0.0219028	0.0289142	-0.0510941	-0.0383432	-0.008469	-0.0101959	-0.0330097	-0.409766
GSM1672458	0.240784	-0.0965358	0.201502	0.00327523	-0.0290275	0.0326827	0.0843651	0.246254	-0.0588406	-0.0594365	-0.0550171	-0.10626	0.00013268	-0.333463	0.0945172	0.196918	0.0137307	0.0998907	-0.00343157	0.0225221	0.0978725	0.0113818	-0.0400276	-0.49568
GSM1672459	0.0513086	-0.24426	0.170141	-0.0258084	-0.00644624	-0.00810409	0.067486	0.16961	-0.0492858	-0.0840854	-0.0395354	-0.0672989	-0.0512773	-0.3123	-0.0711851	0.180699	-0.00933231	0.0828655	-0.0363916	-0.0453635	0.0101767	0.0460647	-0.0973859	-0.281914
GSM1672460	0.0353984	-0.221695	0.157147	-0.104477	-0.0384862	-0.0124112	0.0975822	0.122129	-0.0582763	-0.0884361	-0.0246215	-0.0525457	-0.0234674	-0.289486	-0.0379409	0.198658	0.0144668	0.0696754	-0.0721671	-0.0248633	0.0230766	0.0609473	-0.115687	-0.425201
GSM1672461	0.087734	-0.165107	0.152262	0.0152451	-0.019834	-0.00800699	0.117717	0.224424	-0.0258682	-0.0519903	-0.0104246	-0.0280128	-0.0427763	-0.334434	0.0242185	0.215683	0.0136957	0.0779562	-0.00235824	-0.00143004	0.00177986	-0.0695686	-0.105159	-0.301718
GSM1672462	0.126012	-0.256387	0.170257	0.00298612	-0.144797	-0.0254683	0.000771637	0.0478572	-0.0655524	-0.100527	0.0833585	-0.0333341	-0.0316935	-0.24551	-0.10799	0.179492	0.0334099	0.085439	-0.0345836	-0.1014	-0.0381426	-0.119617	-0.0124652	-0.242598
GSM1672463	0.235232	-0.125801	0.154153	0.0195004	-0.121355	-0.0146085	0.0284457	0.195202	-0.122447	-0.0782074	-0.104762	0.000561967	-0.0244667	-0.295991	0.0106598	0.164493	0.0159487	0.0489923	-0.0386909	-0.0313298	0.0517315	-0.0289411	0.00188174	-0.335793
GSM1672464	0.0956167	-0.194865	0.175028	0.0595304	-0.0221019	-0.0321342	0.0805066	0.116252	-0.0425693	-0.0566979	-0.0478661	-0.0210606	-0.02232	-0.275507	0.0624557	0.2121	0.0208888	0.058602	-0.0302575	-0.022142	0.051015	-0.0310255	-0.0942437	-0.358703
GSM1672465	0.172861	-0.191325	0.182306	0.0336818	-0.0147575	-0.0120375	0.0857807	0.174355	-0.0908706	-0.0631785	0.0345239	-0.113783	-0.0609003	-0.0849432	0.0182215	0.208658	0.0209866	0.068329	-0.0419412	0.00138719	0.038954	-0.0138365	-0.105542	-0.470343
GSM1672466	0.0560804	-0.176919	0.159896	-0.0951455	0.0074655	-0.0315665	0.0487527	0.100111	0.00926583	-0.0732874	-0.0192475	-0.0748332	-0.034764	-0.319872	-0.0284297	0.18107	0.0350939	0.0683652	0.00745774	0.0347872	-0.00369414	-0.0699967	-0.0963483	-0.207164
GSM1672467	0.17631	-0.122528	0.164082	0.0899595	-0.0174893	-0.060809	0.0199152	0.0847524	-0.177657	-0.112147	0.0678245	0.0227525	-0.0125953	-0.317251	0.0849594	0.220395	-0.0397926	0.110747	-0.0354801	-0.00613177	-0.0190876	-0.110733	0.0462478	-0.327832
GSM1672468	0.112623	-0.251103	0.156734	-0.0813691	-0.0432012	-0.010369	0.0616284	0.0574877	-0.0859418	-0.114739	0.0543644	-0.0722323	-0.0467407	-0.283079	-0.0729272	0.178892	0.0237377	0.0431026	0.00454926	-0.0763368	-0.0265273	-0.0686958	-0.113538	-0.338025
GSM1672469	0.09373	-0.0694725	0.220279	0.0824208	0.0923383	0.0128726	0.112095	0.240299	-0.0261098	0.000706717	-0.0264705	-0.0896506	-0.0659324	-0.275313	0.10026	0.21066	0.0533515	0.0960732	0.00611237	0.0044132	0.0451342	-0.0627727	-0.121701	-0.307543
GSM1672470	0.159776	-0.0452805	0.225291	0.183326	-0.0405517	0.00969641	0.154346	0.187595	-0.0632191	0.0112206	0.0661386	-0.02196	-0.0522611	-0.306281	0.180091	0.204849	0.031488	0.0950565	0.0105759	0.0550786	0.0761723	-0.0110134	-0.0796335	-0.350354
GSM1672471	0.200695	-0.155017	0.149911	0.024666	-0.00347813	-0.0395837	0.152358	0.180765	-0.00968075	-0.0422114	-0.00727014	-0.0587237	-0.0655778	-0.343559	0.053902	0.209623	-0.0304497	0.0710495	-0.036672	-0.00417374	0.0334153	-0.101372	-0.0492156	-0.349675
GSM1672472	0.0686937	-0.137043	0.18687	0.0153988	-0.126587	-0.00817318	0.0301656	0.0926946	0.0070869	-0.0587425	0.0251895	0.00136873	-0.0131071	-0.22891	-0.0165667	0.134594	0.021921	0.082735	-0.0397054	-0.0555816	0.0274147	-0.10819	-0.069388	-0.291913
GSM1672473	0.214879	-0.143338	0.156951	-0.0532301	-0.104637	-0.0668026	0.0557096	0.19395	-0.130759	-0.0235583	-0.0364441	-0.0232229	-0.0316926	-0.300068	-0.10993	0.126669	-0.0249954	0.0372423	-0.0615678	-0.0334549	-0.00794474	-0.0900334	-0.00411372	-0.30696
GSM1672474	0.150551	-0.176641	0.139785	-0.0240294	-0.0689288	-0.0310752	0.113566	0.149761	-0.0805952	-0.107447	-0.0262656	-0.136974	-0.064426	-0.36181	-0.0650002	0.205154	0.0506381	0.074607	0.0036257	-0.0291968	-0.0513662	-0.0699973	-0.10801	-0.169983
GSM1672475	0.114134	-0.176175	0.12549	-0.0570624	-0.112018	-0.0568658	0.0532637	0.140596	-0.0727569	-0.0908729	-0.0245777	-0.0775047	-0.075566	-0.333851	-0.0516262	0.213449	-0.0129542	0.0590799	-0.012267	-0.0972149	-0.0256386	-0.1538	0.0034397	-0.284827
GSM1672476	0.150092	-0.108164	0.173981	0.0243232	0.0378829	-0.0167475	0.136806	0.242789	-0.0113246	-0.0630313	-0.0882633	-0.0424644	-0.0215446	-0.275993	0.0513069	0.158913	0.0164441	0.0897291	0.00691246	0.0300059	0.0606877	-0.093141	-0.0801491	-0.318222
GSM1672477	0.187668	-0.176555	0.12514	-0.0743387	-0.217592	-0.0338352	0.028566	0.050736	-0.148405	-0.0912827	0.0207202	-0.0753964	-0.0338172	-0.437239	-0.0927068	0.194985	-0.0111781	0.0549589	-0.0256427	-0.0723051	-0.0466686	0.0011437	0.0158475	-0.486749
GSM1672478	0.158441	-0.185871	0.15868	0.00888035	-0.114677	-0.0489614	-0.00709053	0.054989	-0.128087	-0.108873	-0.0522928	0.0387689	-0.0510902	-0.3289	0.0117264	0.170681	-0.0149335	0.011119	-0.0434386	-0.0270116	0.0226021	0.0128303	-0.0252005	-0.312688
GSM1672479	0.253955	-0.092018	0.199239	0.20723	-0.0188676	-0.0625156	0.00172137	0.172928	-0.109527	-0.0315795	0.00403583	0.0716267	-0.0236265	-0.338123	0.211179	0.177731	0.0106227	0.0955387	-0.0401357	0.0448155	0.0647887	-0.0611323	-0.0243934	-0.348995
GSM1672480	0.0953367	-0.0749753	0.189833	-0.00525596	-0.0798729	-0.0208447	0.0038956	0.069565	-0.126294	-0.116085	0.00209433	-0.019614	-0.00213332	-0.372973	-0.0673655	0.184171	0.0465252	0.0500174	-0.0184537	-0.0835033	0.00541512	-0.228865	-0.0681694	-0.508591
GSM1672481	0.0944144	-0.112067	0.175953	0.0205635	0.0259627	-0.00115739	0.185885	0.215608	0.00195235	-0.0342669	-0.0405455	-0.049808	-0.0435476	-0.148044	0.07478	0.168553	-0.0119809	0.0714057	0.0551731	-0.010792	0.0605294	-0.0565443	-0.0827603	-0.279002
GSM1672482	0.220942	-0.0320832	0.187508	0.173058	0.0340942	-0.0567546	0.148643	0.245103	-0.0453513	-0.106307	-0.113629	-0.0521909	-0.023147	-0.287545	0.212951	0.228476	0.0925968	0.114025	0.0261285	0.0399408	0.0490065	0.0478161	-0.0687524	-0.228813
GSM1672483	0.258628	-0.0788306	0.172673	0.0112896	-0.137321	0.00203412	0.0694157	0.170818	-0.0790247	-0.0326711	0.0557999	-0.0421203	-0.0352274	-0.28706	0.0344602	0.188805	-0.00262476	0.0465102	0.00517964	-0.0631638	0.0453605	-0.125697	-0.0669337	-0.351616
GSM1672484	0.281815	-0.125401	0.160841	0.0690331	-0.052791	-0.040305	0.0629121	0.14089	-0.0720117	-0.043583	0.049444	0.00477219	-0.0256139	-0.293175	0.0694239	0.162858	-0.013225	0.130143	0.00253186	-0.0253667	0.019027	-0.097445	-0.0873633	-0.329677
GSM1672485	0.0482861	-0.145178	0.157208	-0.109008	-0.0543766	-0.0234653	0.0408515	0.141667	-0.0233691	-0.0999363	0.00560854	-0.0694479	-0.0685042	-0.286283	-0.00356645	0.182166	0.00231718	0.0762684	0.0598804	-0.047266	0.0047157	-0.066232	-0.0806186	-0.429376
GSM1672486	0.163257	-0.206553	0.146833	-0.0907857	-0.194582	-0.0188355	0.0402117	0.146415	-0.0757985	0.0181182	0.0245829	-0.0802299	-0.00523934	-0.246966	-0.122639	0.18392	0.0248713	0.029764	-0.0327108	-0.0654481	-0.0217039	-0.00948819	-0.0064069	-0.35647
GSM1672487	-0.0471771	-0.267171	0.141966	-0.0360149	-0.0729628	-0.0463735	-0.00297326	0.0442796	-0.175247	-0.13541	-0.108105	-0.0429641	-0.0403413	-0.242307	-0.0941281	0.175643	-0.0105317	0.0742453	-0.0602795	-0.0524744	-0.00733625	-0.0505778	0.000651511	-0.273372
GSM1672488	0.117628	-0.195969	0.183397	-0.0593244	-0.0582127	-0.00660604	0.032821	0.108098	-0.0736707	-0.0714719	0.0238397	-0.0663818	-0.0357913	-0.278614	-0.0500612	0.19759	-0.0194878	0.0379678	-0.00630704	-0.03938	0.0417005	-0.039259	-0.03919	-0.37142
GSM1672489	0.162783	-0.236587	0.147088	-0.049619	-0.110271	-0.0239612	0.0210788	0.0765314	-0.0860983	-0.0770579	-0.013673	-0.0669261	-0.0482716	-0.283662	-0.0660613	0.178505	0.0218234	0.033741	-0.0557435	-0.0860906	-0.0419571	-0.139387	-0.00236565	-0.269391
GSM1672490	0.169038	-0.123372	0.172603	0.052975	-0.115386	0.0112309	0.0220717	0.158054	-0.0901165	-0.0628877	-0.0504826	-0.0342607	-0.00441449	-0.27609	-0.00693767	0.172841	0.0177695	0.0414319	-9e-05	-0.038155	0.0199696	-0.167288	-0.00828661	-0.233084
GSM1672491	0.232757	-0.201889	0.161262	-0.117072	-0.0523387	0.0231347	0.0677012	0.102703	-0.0939492	-0.0416902	-0.031287	-0.12377	-0.0342361	-0.264343	-0.111225	0.193273	0.0252998	0.0406266	-0.0522089	-0.0466081	-0.0153037	-0.102932	-0.0632103	-0.428308
GSM1672492	0.0685013	-0.178637	0.128811	-0.0311454	-0.0919004	-0.00133478	0.0798875	0.224957	-0.099867	-0.0841147	-0.10039	-0.0509248	-0.0196937	-0.361033	-0.0295122	0.188684	-0.016286	0.0624921	-0.0671781	-0.016605	0.0344929	-0.0585205	0.0198783	-0.334725
GSM1672493	0.176934	-0.163364	0.16416	-0.0431259	-0.0709043	-0.0230072	0.0811542	0.164897	-0.108725	-0.0419372	0.0163511	0.0520671	-0.0140656	-0.279293	0.0223565	0.158563	-0.0221034	0.0357997	-0.0589506	0.0170171	0.0421892	-0.0725638	-0.033239	-0.293175
GSM1672494	0.0908272	-0.149827	0.176801	0.0939644	-0.0946312	-0.0368043	0.0686977	0.122844	-0.143799	-0.024965	-0.029354	0.0117563	-0.04468	-0.256092	0.0457748	0.198318	-0.00557911	0.0337657	-0.0527743	-0.00771752	-0.0094038	-0.0956894	0.00443936	-0.269488
GSM1672495	0.145463	-0.213015	0.179581	-0.026177	0.00434509	0.00338108	0.0862042	0.167913	-0.0440776	-0.0731449	-0.0072465	-0.0673388	-0.0195278	-0.270168	-0.0399311	0.163728	0.0626926	0.0462897	-0.0159585	-0.0319125	-0.0459322	0.0395513	-0.0767729	-0.237064
GSM1672496	0.123459	-0.22886	0.131608	-0.0440621	-0.0451812	-0.0685682	0.0909783	0.149678	-0.0348695	-0.0701496	-0.00717457	-0.115021	-0.0502303	-0.33686	-0.0607162	0.203698	0.0364426	0.0563487	-0.0470409	-0.0680718	-0.0172271	0.0573296	-0.0706311	-0.273372
GSM1672497	0.23156	-0.130903	0.207212	0.157211	-0.00173357	-0.0116147	0.151737	0.250188	-0.0251919	-0.0128646	0.0465122	0.0303098	-0.0488405	-0.284341	0.149897	0.214723	0.0329544	0.0897611	-0.0193065	0.0613687	0.0580604	-0.0539314	-0.0626216	-0.238521
GSM1672498	0.211089	-0.204781	0.221071	0.280012	0.0671689	-0.00784211	0.0980111	0.159287	0.0524721	0.0530469	-0.0183689	-0.0242979	-0.0410691	0.168819	0.181219	0.212991	0.0207672	0.195767	-0.0507367	0.193024	0.0497198	-0.153213	-0.0961606	-0.453742
GSM1672499	0.147598	-0.187787	0.175595	-0.0475092	0.0185803	-0.0187761	0.0469939	0.184339	-0.0580926	-0.0856404	-0.0158454	-0.076546	-0.0484545	-0.279682	-0.0383453	0.225055	0.0183532	0.0870458	-0.0256856	-0.00258383	-0.0595058	0.0869358	-0.0872138	-0.364236
GSM1672500	0.119639	-0.223444	0.119208	-0.00723889	-0.11735	-0.0469319	0.109243	0.135387	-0.0306445	-0.0562001	-0.0171119	0.0230332	-0.0790745	-0.325211	0.0144177	0.194803	-0.0319112	0.0334097	-0.0546033	-0.0197421	0.0219635	0.0117488	-0.00392458	-0.413164
GSM1672501	0.0270526	-0.1895	0.138026	-0.129979	-0.049348	-0.0179874	0.0376519	0.133553	-0.0359407	-0.104146	-0.0241141	-0.103028	-0.0344445	-0.200175	-0.0986592	0.188175	0.0235811	0.0729586	-0.00341569	-0.116322	-0.0190973	-0.0348451	-0.135048	-0.251238
GSM1672502	0.185883	-0.253117	0.195243	0.146	-0.145389	-0.0687583	0.0136658	0.0852271	-0.117987	-0.0708503	0.0115986	0.0427562	-0.019568	-0.252403	-0.0182242	0.193172	-0.00601393	0.0695789	-0.00716436	-0.0555088	-0.0154831	-0.0137308	0.0484281	-0.242889
GSM1672503	-0.00709343	-0.171567	0.127151	-0.160044	-0.126432	-0.0755202	-0.0208011	0.0533917	-0.135896	-0.114755	-0.0372464	-0.0410232	-0.0538638	-0.275216	-0.114592	0.172724	-0.016504	0.0385827	-0.011509	-0.0752965	-0.0735756	-0.00179708	-0.0340823	-0.303951
GSM1672504	0.201395	-0.141992	0.135989	-0.0778788	-0.135923	-0.0347663	0.0337086	0.0606559	-0.129401	-0.0829409	-0.0411278	-0.0513106	-0.061548	-0.342491	-0.132472	0.191417	-0.0194671	0.0484765	0.00183607	-0.0905956	-0.0254684	-0.0635352	-0.0370869	-0.415591
GSM1672505	0.172121	-0.224249	0.174035	0.0585759	-0.026695	0.00125935	0.142205	0.306251	0.0231442	0.0155874	-0.087588	-0.0194828	0.00336541	-0.245025	0.0391409	0.179023	0.0111545	0.0689963	-0.0357144	0.0219391	0.0253055	-0.0116991	-0.0688929	-0.241821
GSM1672506	0.202318	-0.179521	0.17558	0.0793529	-0.0903678	-0.0204264	0.0196294	0.136245	-0.089134	-0.0823008	-0.0249393	0.0309143	-0.0121957	-0.277546	0.065183	0.196654	-0.0262479	0.106373	-0.0546925	0.0392654	-0.00705177	-0.0514563	-0.010196	-0.267644
GSM1672507	0.167526	-0.146757	0.17775	-0.00430032	0.0969387	-0.0114955	0.160997	0.24907	0.00516664	-0.0343216	-0.00202395	-0.122202	-0.0253198	-0.279487	0.0451006	0.194313	0.0319677	0.115554	-0.0137096	0.131088	0.0563499	-0.0867012	-0.102885	-0.481215
GSM1672508	0.0249664	0.0762177	0.153307	0.0205806	0.120604	-0.0287304	0.118693	0.220995	-0.0185386	-0.0857443	-0.0219676	-0.0825886	-0.0519249	-0.248422	0.082988	0.218082	0.0532343	0.0890644	0.0473796	0.0203801	0.024525	0.0329086	-0.0787049	-0.359674
GSM1672509	0.109993	-0.162738	0.139915	-0.0481131	-0.122008	0.0213227	0.136006	0.180915	0.00615864	-0.0788362	-0.0637796	-0.0785659	-0.0329732	-0.36113	-0.0066722	0.203583	0.0382468	0.0513562	-0.0544563	-0.0258239	-0.0445907	-0.102221	-0.0550951	-0.17241
GSM1672510	0.233743	-0.109221	0.161177	0.120565	-0.0265482	0.00810869	0.0458112	0.164156	-0.105567	-0.00734382	-0.0424447	-0.0059109	-0.0416935	-0.312009	0.099106	0.205811	0.00471226	0.0521147	-0.072901	0.103767	0.0587158	-0.0843812	0.00855653	-0.241627
GSM1672511	0.107563	-0.0939457	0.190354	0.0248266	-0.0143499	-0.00554625	0.0451033	0.0836992	-0.0343954	-0.080604	-0.0136189	-0.0557189	-0.0127505	-0.334628	0.030441	0.182936	0.0479083	0.0734446	0.00608614	-0.0096572	0.0396021	-0.100066	-0.0575128	-0.334045
GSM1672512	0.134413	-0.186069	0.118656	-0.0991621	0.0290621	-0.0106988	0.0799877	0.249224	-0.107503	-0.0990181	-0.105693	-0.0856889	-0.00950884	-0.265411	-0.105385	0.193446	-0.00639624	0.0809254	-0.0559991	-0.0629517	0.00248345	-0.110726	-0.00130295	-0.396563
GSM1672513	0.0445175	-0.261632	0.18688	-0.0455818	-0.0997491	0.02886	0.0228142	0.122249	-0.037632	-0.102227	0.0365117	-0.0620583	0.0118574	-0.314047	-0.0439388	0.197829	-0.00451368	0.0357619	-0.051942	-0.0798304	-0.00176505	-0.130962	-0.0474046	-0.318707
GSM1672514	0.202055	-0.218182	0.151858	-0.00375884	0.00682316	-0.00670287	0.0858105	0.215748	-0.077327	-0.0725787	-0.0339842	-0.0722512	-0.0465473	-0.393263	0.0255046	0.184004	0.00599336	0.0752082	-0.0154131	-0.00449271	0.00982296	-0.00666256	-0.0518175	-0.327541
GSM1672515	0.0197911	-0.169812	0.127696	-0.156702	-0.271058	0.0105353	-0.0665055	0.0137495	-0.1415	-0.152258	-0.0384069	-0.0824493	0.00184888	-0.331521	-0.139672	0.139726	0.0355843	0.0127839	0.0027444	-0.130966	-0.0189018	-0.176713	-0.0180349	-0.510436
GSM1672516	0.168237	-0.15199	0.137813	-0.0884261	-0.0779877	-0.0339076	-0.0413217	0.0605337	-0.0729023	-0.0927958	0.0576847	-0.120023	-0.0379438	-0.305796	-0.0629254	0.14591	0.0116943	0.0791052	-0.000325536	-0.0340639	0.00175128	-0.0831485	0.00148181	-0.442384
GSM1672517	0.131727	-0.20701	0.153109	-0.0166985	-0.120144	-0.0261903	0.0376709	0.204074	-0.112771	-0.0899627	-0.0330301	-0.109274	-0.0804695	-0.324046	-0.00761938	0.1825	0.0309727	0.0707153	-0.0597587	-0.0404625	0.0219074	-0.0762681	-0.127609	-0.227939
GSM1672518	0.0723002	-0.172917	0.15047	-0.103795	-0.0883951	-0.0205103	0.0854515	0.106619	-0.0938838	-0.0451299	-0.125949	-0.0799037	0.00936219	-0.396466	-0.112889	0.181499	-0.0537403	0.0145822	0.00203362	-0.0375908	-0.00257919	-0.126265	-0.0445934	-0.503932
GSM1672519	0.0643869	-0.131314	0.16866	0.0169672	0.0104492	-0.0348825	0.0949404	0.117341	-0.0729454	-0.103807	0.0152061	-0.0994717	-0.0220564	-0.402	0.0342864	0.237238	0.0105931	0.0951072	-0.0240409	0.0195494	-0.00431622	-0.0930923	-0.0745678	-0.296864
GSM1672520	0.0785245	-0.211239	0.150786	-0.103799	-0.0495493	0.0103149	-0.0145342	0.102005	-0.115233	-0.109227	-0.0412097	-0.0877259	-0.0281421	-0.302883	-0.148265	0.176557	0.0121375	0.0446294	-0.00558708	-0.119232	-0.0132323	-0.112932	-0.070113	-0.29337
GSM1672521	0.10995	-0.0286708	0.161103	-0.0266051	0.0125028	-0.0171537	0.0806206	0.171555	-0.0416421	-0.072372	0.04118	-0.0582986	-0.0139743	-0.317445	0.118066	0.209873	0.0470423	0.0734765	-0.0212234	0.0322373	0.0162698	-0.0906111	-0.0568227	-0.424619
GSM1672522	0.158539	-0.0762799	0.181606	0.0297173	-0.0174096	-0.0138925	0.0689632	0.165883	-0.0330026	0.0170859	0.0892345	-0.0674138	-0.0521977	0.21629	0.057931	0.20877	0.0416931	0.130191	-0.00119318	0.0609083	-0.0104708	-0.0670597	-0.123517	-0.408892
GSM1672523	0.0489418	-0.0624352	0.16886	-0.0705873	0.181293	-0.0290027	0.0705492	0.198449	-0.00032048	-0.0984371	-0.0163394	-0.181663	-0.0407705	-0.26279	0.0240222	0.193073	0.0563105	0.0630555	-0.00720186	-0.00438959	0.0587769	0.00254151	-0.0744605	-0.374624
GSM1672524	-0.128968	-0.24351	0.103622	-0.0359242	-0.14468	0.00939112	-0.016418	0.0137914	-0.0496133	-0.0771233	0.022208	-0.00491154	-0.00391608	-0.25648	-0.127288	0.215334	-0.0357602	0.0558078	-0.0654261	-0.105411	-0.0638437	0.0340528	-0.0416239	-0.24386
GSM1672525	0.10942	-0.0194321	0.196511	0.0481373	0.0392624	-0.00715236	0.0763451	0.214891	0.0446054	-0.0732687	-0.0639004	-0.163548	-0.0116872	-0.349481	0.157031	0.199388	0.0809796	0.112026	-0.0175239	0.0764607	0.0396359	-0.0370643	-0.0526904	-0.33288
GSM1672526	0.164637	-0.172527	0.128797	0.076122	0.224016	-0.0399423	0.152158	0.170866	-0.113029	-0.0749885	0.0671803	0.0622301	-0.00560233	-0.160955	0.0688927	0.0964284	-0.0476352	0.0925975	0.0123997	-0.0245908	0.0130276	0.074426	-0.0967117	-0.263858
GSM1672527	0.0577627	-0.170287	0.129831	-0.01952	-0.00484582	-0.0437275	0.110249	0.13201	-0.0394166	-0.0516786	-0.0521833	-0.0486693	-0.00179448	-0.177556	-0.0192953	0.143038	-0.0425927	0.0548625	-0.0134091	0.0373343	0.0352265	0.113178	-0.0569887	-0.479953
GSM1672528	0.206365	-0.0893091	0.190523	0.20865	0.0313781	-0.0192335	0.160213	0.203476	-0.0249901	-0.0237861	0.0426765	0.0328202	0.0382811	-0.319678	0.164634	0.165973	-0.0612679	0.107636	-0.017541	0.0868455	0.0288013	0.128066	0.000731724	-0.463062
GSM1672529	0.115942	-0.232531	0.167094	0.0618601	0.0143538	-0.0460968	0.127077	0.126444	-0.141	-0.0272438	0.00335411	0.0776191	0.0286408	-0.145617	0.034871	0.0981781	-0.0704713	0.0783031	-0.0208355	0.0877111	0.043894	0.0367366	-0.0245261	-0.317736
GSM1672530	0.2614	-0.191272	0.125708	0.0538681	-0.119414	-0.0517087	0.13901	0.147723	0.00638728	-0.0498776	-0.010312	-0.0695929	-0.0326484	-0.412873	0.00930654	0.150034	-0.0881906	-0.0149405	-0.0373423	-0.0670518	0.0212535	-0.0940149	0.0422044	-0.380351
GSM1672531	0.253575	-0.0824188	0.143877	0.107864	0.0783537	-0.0493447	0.139928	0.232752	-0.0954658	-0.0619838	0.0243872	0.0728377	0.0438187	0.106786	0.153187	0.156751	-0.0109542	0.0853334	-0.0063068	0.0383333	0.080162	-0.0426289	-0.0200774	-0.309776
GSM1672532	0.144667	-0.0446701	0.198274	0.0951351	-0.00258805	-0.0330512	0.0812283	0.130943	-0.0544691	-0.0405263	-0.0335833	0.0185298	-0.0116168	-0.0631007	0.108852	0.175649	0.0126618	0.110906	0.0294342	0.0341521	-0.00366638	-0.0368581	-0.0318841	-0.208329
GSM1672533	0.200822	-0.203444	0.173039	0.0959993	0.0293695	-0.0110528	0.160602	0.233844	-0.000621799	-0.00758759	-0.0249213	-0.0457975	0.0161799	-0.262013	0.0266096	0.155819	-0.0597944	0.0538956	-0.0128958	0.071812	0.0346665	0.0193335	-0.0742088	-0.434715
GSM1672534	0.238004	-0.202576	0.149671	0.19343	0.148463	-0.0577782	0.124976	0.183563	-0.127248	-0.0269848	0.101437	-0.0119937	-0.00285294	-0.293952	0.176187	0.18491	-0.0537801	0.0584302	-0.0224106	0.0488558	0.0877858	0.0925112	-0.00282292	-0.460149
GSM1672535	0.160541	-0.065702	0.180477	0.0765637	0.0646986	-0.0230998	0.0767337	0.188602	-0.0546035	-0.0535184	-0.0743395	0.0651769	-0.000125008	-0.33055	0.154898	0.154997	-0.0615123	0.045774	-0.00535075	0.0905145	0.0637386	-0.0383334	-0.00398812	-0.344336
GSM1672536	0.21526	-0.184256	0.176778	0.162235	0.036602	-0.0388668	0.154393	0.226939	-0.0390616	-0.0226835	0.0343754	0.00876217	-0.011495	-0.343559	0.101224	0.131606	-0.0602399	0.0650039	-0.0368595	0.0644931	0.0285865	0.131328	-0.0469253	-0.399767
GSM1672537	0.178269	-0.254383	0.140257	0.101169	0.00583698	-0.0733771	0.0780405	0.171286	-0.124437	-0.0579707	0.0150672	0.0695895	0.032023	-0.378992	0.0630219	0.111986	-0.0761425	0.0656243	-0.0658616	0.0226609	0.0424683	-0.125062	-0.0453859	-0.191438
GSM1672538	0.143195	-0.137995	0.160462	0.0669131	-0.0909512	0.00851319	0.127398	0.167244	0.0161424	-0.0571382	0.0186752	-0.0247528	0.0125243	-0.266382	0.0427977	0.149221	-0.0246145	0.098338	-0.00493998	0.0492453	0.0560592	-0.0779739	-0.0371952	-0.252403
GSM1672539	0.195226	-0.193378	0.156466	0.158095	-0.0551871	-0.0479394	0.0453441	0.101624	-0.0829386	-0.0327487	0.0562902	0.00948149	-0.0292558	-0.349578	0.0280136	0.175934	-0.0365636	0.0374035	-0.0257808	0.045562	0.0605145	-0.0148428	0.0401333	-0.21726
GSM1672540	0.0216434	-0.306503	0.123298	-0.0282049	-0.0198068	0.00165069	0.0665686	0.17454	-0.0785631	-0.0123106	-0.0451895	-0.0370092	0.0633922	0.111931	-0.149825	0.138488	-0.0602129	0.0390031	-0.123672	-0.0331069	0.0785029	-0.0748013	0.00335251	-0.269391
GSM1672541	0.00955971	-0.170402	0.0913567	0.107259	-0.0589085	-0.0602185	0.0808577	0.0666943	-0.155385	-0.0362576	-0.0154243	-0.0571317	-0.0111508	-0.318124	0.0458772	0.145718	-0.0650942	0.0168863	-0.0412966	0.0507531	-0.0367269	-0.174284	-0.0253414	-0.180662
GSM1672542	0.0941319	-0.0441504	0.135	0.00518911	-0.0525025	-0.00409211	0.140428	0.183235	-0.0254851	-0.0965601	0.018862	-0.0884875	-0.00379922	-0.355111	0.0435954	0.156457	-0.0428624	0.0779458	-0.0137581	0.0289206	-0.0138482	0.0123627	-0.053293	-0.242598
GSM1672543	0.212019	-0.1881	0.11152	0.0933506	0.129605	-0.0492811	0.157862	0.241626	-0.106005	-0.0484045	-0.0516327	0.0282488	-0.0231514	-0.377245	0.0826922	0.169131	-0.0774444	0.0786472	-0.0375412	0.0314054	0.0586918	0.0565402	-0.00874951	-0.230075
GSM1672544	-0.0200591	-0.266843	0.156922	-0.0663187	-0.0705505	-0.0420431	0.0251737	0.143573	-0.0813828	0.0226558	0.057942	-0.0395664	0.0182567	0.0688283	-0.116759	0.16274	-0.0475115	0.0554753	-0.104971	-9.31e-05	0.0178037	0.0103	-0.0176762	-0.443258
GSM1672545	0.194261	-0.194822	0.141259	-0.0264333	-0.00153345	-0.0428776	0.0862238	0.0960023	-0.110051	-0.11206	0.0777092	-0.0234388	-0.0283983	-0.370741	-0.0928374	0.176206	-0.0399054	0.0487706	0.0157895	-0.126151	-0.043708	-0.060909	-0.0426929	-0.240656
GSM1672546	0.0655991	-0.205209	0.136621	-0.0622856	-0.00976604	-0.0141928	0.106032	0.195266	-0.0589839	-0.0512391	-0.034913	-0.0745513	-0.0260057	-0.188914	-0.0712447	0.186385	-0.0345632	0.0527553	-0.0629588	-0.0667527	0.0365655	-0.0898167	0.0018942	-0.306669
GSM1672547	0.180434	-0.209524	0.16293	0.131705	-0.0268381	-0.0150521	0.0491721	0.168653	-0.175477	-0.0903966	-0.12098	0.0248104	0.000747834	-0.0394136	0.0939109	0.146081	-0.0104358	0.0614278	-0.0462409	0.0202313	0.00432854	-0.0606204	-0.0558206	-0.201631
GSM1672548	0.194595	-0.0111308	0.164991	0.19763	-0.0201823	-0.0154486	0.109343	0.200298	-0.0950198	-0.0173547	-0.00601718	-0.0182777	0.0486791	-0.382584	0.133954	0.176583	-0.0273831	0.074226	-0.0141259	0.15644	0.01627	0.00738492	-0.0545628	-0.203961
GSM1672549	0.206916	-0.232602	0.139436	0.0288868	0.0244617	-0.0164547	0.0767157	0.205168	-0.102773	-0.0581769	-0.0513717	-0.00810731	0.00866906	-0.361227	0.0548984	0.202895	-0.0320598	0.0375759	-0.0390907	0.0111449	0.0532882	-0.172648	-0.0245112	-0.228327
GSM1672550	0.0489493	-0.231326	0.122716	-0.00446797	-0.147901	-0.113904	0.0481071	0.0180806	-0.159546	-0.139541	-0.0413026	0.0990334	0.022514	-0.305019	-0.105834	0.178521	-0.0596566	0.0815718	-0.105098	0.0403914	-0.00338013	-0.0562542	0.0471434	-0.28172
GSM1672551	0.254377	-0.265347	0.1824	0.135318	-0.118249	-0.103662	0.060709	0.11566	-0.12334	-0.0547922	0.0783172	0.117548	-0.00228983	0.0539753	0.203908	0.212299	-0.027159	0.0640021	-0.0463283	0.0466231	0.0301777	-0.0995787	-0.0510566	-0.176002
GSM1672552	0.201798	-0.142756	0.183244	0.125515	0.0914009	0.0162494	0.170262	0.262922	-0.00721213	0.0586652	-0.0734201	0.0119446	-0.0429903	0.259781	0.0995909	0.190138	-0.00698289	0.0598866	-0.0141747	0.0260043	0.0496158	-0.0552712	-0.0682435	-0.272789
GSM1672553	0.255026	-0.195016	0.134039	0.0164093	0.14457	0.00591161	0.158262	0.170538	-0.0567074	-0.0513509	-0.0151787	-0.0543932	-0.0377448	0.296476	0.0662053	0.171391	-0.00846196	0.0776952	-0.00397833	0.0452182	-0.00233571	0.0508696	-0.100417	-0.329677
GSM1672554	0.149416	-0.27074	0.128374	0.0414115	-0.0283639	-0.0664557	0.0817958	0.175312	-0.124963	0.142023	-0.00693972	0.042937	0.0524618	-0.186098	0.0136184	0.161483	-0.0454995	0.0662785	-0.077068	-0.0138676	0.0587537	-0.0546082	0.0146719	-0.0245607
GSM1672555	0.101133	-0.240795	0.112979	-0.0228466	-0.0572902	-0.0260331	-0.033055	0.142067	-0.0599223	-0.0847426	0.0537489	0.0662446	0.0755925	-0.324629	-0.0691117	0.159132	-0.0877634	0.0631192	-0.0916413	-0.0656174	0.0153807	-0.138913	-0.00340783	-0.101544
GSM1672556	-0.0467733	-0.214408	0.137163	-0.0164671	-0.0252602	-0.0110305	0.0466552	0.0838635	-0.107499	-0.106242	-0.00380219	-0.0242144	0.0192468	-0.322978	-0.0311842	0.143296	-0.0422901	0.0559765	-0.0255448	-0.0402591	-0.0671204	-0.115809	-0.0125957	-0.246287
GSM1672557	0.117423	-0.206398	0.140476	-0.135018	-0.061356	-0.0145981	0.0287977	0.0925541	-0.0991228	-0.115381	0.0396163	-0.125435	0.011416	-0.0801864	-0.109535	0.186692	-0.00434984	0.0477978	-0.0410847	-0.0418674	0.00440513	-0.0689682	-0.0417339	-0.368896
GSM1672558	0.218203	-0.167968	0.152345	0.0671839	0.0168904	-0.0458752	0.0354915	0.117994	-0.193874	-0.128407	-0.0048424	0.0271091	0.00656952	-0.169595	0.0494948	0.147123	-0.0457717	0.0816478	-0.0147702	0.0370088	0.0272616	0.01173	-0.0505947	-0.162703
GSM1672559	0.214046	-0.183215	0.124022	0.0783152	-0.0267264	-0.0400546	0.103643	0.159099	-0.0805924	-0.0694543	-0.0271978	0.0103183	0.035401	-0.336278	0.0484863	0.168232	-0.0272815	0.062627	0.00200229	0.0504744	0.0807558	-0.00809662	-0.0431074	-0.47209
GSM1672560	0.118016	-0.148477	0.144766	0.026333	-0.0680813	-0.0282192	0.0935577	0.187673	-0.121426	-0.0757074	0.00775641	0.0522548	0.0252924	-0.297253	-0.00244676	0.187005	-0.0524869	0.0654028	-0.0138037	-0.0272057	0.00996307	0.0181442	-0.0183589	-0.250267
GSM1672561	0.0820486	-0.183061	0.126154	-0.00530107	-0.0823088	-0.0310336	0.0376628	0.118544	-0.157554	-0.0980455	-0.0576404	-0.143121	-0.0132653	-0.295699	-0.0278058	0.156994	-0.0271802	0.0340897	-0.0797891	-0.0449657	-0.00456773	-0.0600648	-0.0561342	-0.142802
GSM1672562	0.12256	-0.225425	0.12131	0.0181373	-0.149847	-0.0165937	0.00895978	0.161579	-0.155939	-0.136737	-0.117204	-0.0965463	0.00267055	-0.336666	0.00600882	0.204121	-0.0385645	0.0399764	-0.0296286	-0.0191622	-0.0208133	0.0682701	-0.0481154	-0.33123
GSM1672563	0.0456506	-0.264914	0.142541	-0.0125023	-0.0948754	-0.0133552	0.0986297	0.195932	-0.0875663	-0.0812794	-0.0527525	-0.0611595	0.0320199	-0.315795	-0.0556717	0.15084	-0.0407263	0.0999357	-0.0791266	-0.0485691	-0.0195647	0.0844967	-0.110244	-0.256965
GSM1672564	0.0730564	-0.0908121	0.145416	0.0203774	-0.0242042	-0.00902263	0.0859299	0.140925	-0.106066	-0.0685412	-0.0786846	0.0366104	0.00388667	-0.331036	0.0917228	0.159122	-0.0247738	0.0921948	-0.0202497	0.0472551	0.0158694	-0.0454923	-0.0310025	-0.241045
GSM1672565	0.105979	-0.211886	0.123965	-0.0552527	-0.159423	-0.0430504	0.0411905	0.137409	-0.126515	-0.0566544	0.000455801	-0.0384267	-0.0249529	-0.233958	0.00102631	0.160433	-0.0743532	0.0516939	-0.0181109	-0.0947556	-0.00290933	0.00167553	-0.0271719	-0.21794
GSM1672566	0.0730612	-0.218807	0.166424	-0.0510374	-0.108655	-0.00999457	0.0941497	0.0844344	-0.0495664	-0.109744	0.0217299	-0.115479	-0.0216655	-0.231725	-0.0683363	0.162133	0.00683147	0.0454139	-0.0173229	-0.0302188	-0.0316239	0.0229305	-0.0872281	-0.386564
GSM1672567	0.0701202	-0.245266	0.154997	-0.106603	-0.191752	-0.0195616	-0.00823324	0.0146048	-0.0970456	-0.122663	-0.0257992	-0.153496	-0.0433248	-0.282206	-0.157584	0.196768	-0.0280225	0.0719509	-0.0572583	-0.0678517	-0.0485846	0.00406064	-0.060644	-0.2093
GSM1672568	0.00301597	-0.201765	0.109454	0.0310849	-0.018433	-0.0366525	0.0924054	0.0347637	-0.110988	-0.0984369	0.131644	0.00554364	0.0501065	-0.353558	-0.0449314	0.111528	-0.0960433	0.0643355	-0.0448315	0.0381386	-0.0110728	0.106007	-0.048929	-0.133482
GSM1672569	0.139614	-0.298383	0.129078	0.0101787	-0.108494	-0.0465002	0.00838182	0.113179	-0.162082	-0.0838043	-0.0361076	0.00104961	0.0178699	-0.279002	-0.0718656	0.112853	-0.0837871	0.0856732	-0.0575344	-0.0241771	0.025107	0.0212331	-0.0572608	-0.18804
GSM1672570	0.159459	-0.193819	0.201502	0.130808	0.0323796	-0.0290889	0.0170346	0.180524	-0.155648	-0.0808417	-0.0278529	0.0541561	0.0405718	-0.293952	0.0811069	0.143071	-0.0238512	0.0646195	-0.0256355	0.0729245	0.0602486	0.020099	-0.0188758	-0.102417
GSM1672571	-0.0584325	-0.126243	0.156882	-0.00933072	0.0502365	-0.0141433	0.138187	0.192508	-0.100594	-0.0790568	0.036319	-0.0350853	0.00662072	-0.249782	-0.0839807	0.150294	0.0100744	0.102834	0.0378033	-0.0382951	0.0405766	0.0538833	-0.129234	-0.250364
GSM1672572	0.226064	-0.112862	0.157871	0.0661464	-0.0828289	0.0158177	0.0891416	0.129654	-0.0581042	-0.0537482	-0.00955004	-0.0544749	-0.00749753	-0.219202	0.0383949	0.122002	-0.0391089	0.0475387	0.0277699	-0.0815226	0.0209096	-0.0798754	-0.0908247	-0.215319
GSM1672573	0.0749598	-0.198863	0.152413	-0.0184425	-0.0516092	-0.0382261	-0.0267472	0.119874	-0.0838886	-0.051507	0.00893622	-0.000499853	-0.00766025	-0.298126	0.0118444	0.177588	-0.0240451	0.0548481	-0.0643469	-0.0258766	-0.00709022	0.0190499	0.00826928	-0.242792
GSM1672574	0.0851309	-0.189474	0.177349	0.00833442	0.0517325	0.0173219	0.128152	0.211104	0.0165841	-0.0473616	-0.011599	-0.047473	0.00151726	-0.382778	-0.0339499	0.146556	-0.00339722	0.0557565	-0.0115885	0.0692472	0.0133567	0.0464146	-0.0871465	-0.253276
GSM1672575	-0.0551669	-0.2077	0.148876	0.0130239	0.0184913	-0.033695	0.103546	0.266667	-0.0635866	-0.0486979	-0.0623781	-0.0113854	-0.0169553	-0.18406	0.000574788	0.156038	-0.0306244	0.0803454	-0.0271549	0.0208693	0.0399063	-0.00658898	-0.0542598	-0.290846
GSM1672576	0.133857	-0.0756809	0.170536	0.216343	0.0197506	-0.0770898	0.132688	0.17382	-0.0709247	-0.0254452	-0.0341961	0.0793987	0.0609203	-0.00815455	0.20588	0.124875	-0.0455204	0.0792194	-0.023988	0.103464	0.0392776	0.0768615	-0.0438975	-0.10232
GSM1672577	0.0809417	-0.239628	0.11882	-0.0960145	-0.0451392	-0.052639	0.0583396	0.157432	-0.0911815	-0.0887112	-0.0703584	-0.0122454	0.00531589	-0.360256	-0.178421	0.164204	-0.0553182	0.0311419	-0.0516841	-0.00373483	0.02003	-0.0372623	-0.0498824	-0.2691
GSM1672578	0.219347	-0.0358805	0.192999	0.117672	-0.0406897	-0.0870797	0.0512915	0.100695	-0.134217	-0.102273	-0.0750151	0.0766002	-0.02054	-0.258519	0.138483	0.206899	0.000647618	0.0775236	-0.0539421	0.0220185	-0.00941744	0.0260119	-0.0615761	-0.164838
GSM1672579	0.106071	-0.121555	0.174125	0.0847756	-0.00646795	-0.00886817	0.0695555	0.161485	-0.0335446	-0.0861568	0.0799703	-0.0823356	0.0390059	-0.284438	0.0883522	0.136163	-0.0661334	0.0790483	-0.0264191	0.0529196	0.0172084	0.0296404	-0.0586159	-0.222406
GSM1672580	0.127831	-0.142746	0.158423	0.139513	0.0149839	-0.022553	0.147593	0.230542	-0.0663153	0.0227885	0.0333642	0.116748	0.0406832	-0.0831958	0.0596975	0.0610821	-0.0556015	0.0929915	-0.0329615	0.0266323	0.0496296	0.090757	-0.0785864	-0.306572
GSM1672581	0.109075	-0.180145	0.174468	0.0489442	-0.0815601	-0.0043587	0.0156143	0.175301	-0.101542	-0.0632823	-0.102863	-0.00833344	-0.0323876	-0.266091	0.0213897	0.154245	-0.023515	0.0559098	-0.00861593	0.006856	0.030519	0.0643523	-0.0480181	-0.256383
GSM1672582	0.0336877	-0.202181	0.127189	-0.0373702	0.087867	0.0116933	0.171131	0.228584	-0.0648547	-0.0192386	0.0311802	0.00501543	0.021156	-0.293661	0.0140327	0.0832881	-0.0850285	0.121955	-0.0389058	0.106635	0.0515861	0.0648268	-0.0231922	-0.343365
GSM1672583	0.098535	-0.183374	0.146854	0.0341696	0.0771264	-0.0327715	0.0865258	0.150406	-0.118035	-0.0273655	0.0131882	0.0824407	0.0414346	-0.2226	0.00605404	0.0460166	-0.11611	0.114335	-0.000424691	0.0613905	-0.000658534	0.0490682	-0.0725038	-0.21629
GSM1672584	0.0174393	-0.244413	0.0914635	-0.0827174	-0.182226	0.018302	0.0685333	0.0225253	-0.0651239	-0.113776	0.15798	-0.0677816	0.014008	-0.28871	-0.108377	0.111199	-0.0621345	0.0479575	0.0689779	-0.0992082	-0.0062319	0.0440588	0.015604	-0.385205
GSM1672585	0.111651	-0.164932	0.123694	-0.00297226	-0.16692	-0.0337576	0.0832498	0.0622161	-0.16264	-0.2066	-0.0630837	-0.0574955	-0.0434404	-0.233764	-0.0603198	0.111543	-0.0971767	0.0554555	-0.032297	0.00708169	0.00120574	-0.12051	-0.0110659	-0.373265
GSM1672586	0.160925	-0.189784	0.161	-0.048163	-0.0936571	-0.0347417	0.0538305	0.0641865	-0.0790807	-0.125694	0.0149435	-0.0505507	-0.0486854	-0.322008	-0.0527233	0.106041	-0.0440409	0.0828885	0.0299384	-0.0405404	0.037593	0.044693	-0.0115773	-0.455975
GSM1672587	0.16557	-0.200179	0.127841	0.0154311	0.209134	-0.0391012	0.153516	0.187517	-0.0617253	-0.038502	0.0602131	-0.0707448	0.0286578	-0.331715	0.0303371	0.0810614	-0.048264	0.0515274	0.0375407	0.0332539	0.0691373	0.0986987	-0.0452069	-0.149209
GSM1672588	0.15887	-0.0847918	0.192717	0.152014	0.0468602	-0.00981419	0.169496	0.227396	0.00283198	-0.0305318	-0.0419765	0.0167055	-0.0322958	-0.252888	0.115847	0.147934	-0.0336188	0.0688445	0.00801799	0.0587114	0.0306588	0.0394196	-0.0533692	-0.272012
GSM1672589	0.100506	-0.0923192	0.151082	-0.00780753	-0.0835549	-0.0514081	0.0553369	0.0820199	-0.120091	-0.0663001	-0.00766484	-0.00808607	-0.0164763	-0.257742	0.0376387	0.154833	-0.0660812	0.1003	0.0163455	-0.0297526	0.0158366	-0.0137122	0.0417768	-0.293661
GSM1672590	0.232542	-0.183462	0.142191	0.135614	-0.0153814	-0.0308437	0.157268	0.248224	-0.0419612	-0.0199061	0.0692581	0.0302965	-0.011719	-0.214154	0.0880592	0.116256	-0.0865406	0.116708	0.00745318	0.0558802	0.116005	0.0787409	0.0158689	-0.340744
GSM1672591	0.204917	-0.124883	0.142464	0.101942	0.0509946	-0.0353622	0.141603	0.213255	-0.109786	-0.0311072	-0.13681	0.0275951	0.0195201	-0.25483	0.0764881	0.103676	-0.0304616	0.0859072	-0.0242114	0.039017	0.078426	0.0382832	0.0171553	-0.249005
GSM1672592	0.266441	-0.229881	0.154116	0.197014	0.00697088	-0.0442115	0.111669	0.208839	-0.0733901	-0.0286871	-0.112544	0.0241428	-0.0449165	-0.0682458	0.1399	0.14811	-0.0518961	0.0739558	0.0291522	0.0480339	0.0564816	0.0662738	-0.0403127	-0.290263
GSM1672593	0.245704	-0.164257	0.140384	0.164336	0.0105171	-0.00298948	0.123569	0.219155	-0.104927	-0.0532649	-0.0220624	0.0104565	0.0211708	-0.1661	0.0870758	0.112087	-0.0672759	0.0338282	-0.00161117	0.0200373	0.0504327	-0.0366018	0.033266	-0.435395
GSM1672594	0.128597	-0.217175	0.12743	-0.0601533	0.00112623	0.00132925	0.0641099	0.164502	-0.0619385	-0.0662984	-0.067427	-0.103446	-0.0174836	-0.153966	-0.0492655	0.158264	-0.0568276	0.0630274	-0.0124306	0.00685072	0.0462496	0.0960462	-0.0473325	-0.281138
GSM1672595	0.020667	-0.197628	0.168274	0.00865184	0.0824942	0.0177306	0.116287	0.228642	-0.0195996	-0.0248023	0.0141456	-0.0520109	-0.0222874	-0.23357	0.0148909	0.169339	-0.0347776	0.0863541	-0.0424406	-0.0213002	0.037229	0.116766	-0.100095	-0.318901
GSM1672596	0.152539	-0.175926	0.132501	-0.0836032	0.0289948	-0.0240628	0.0850831	0.190429	-0.089834	-0.095058	0.0591956	0.000432401	0.0518062	-0.226192	-0.104956	0.130957	-0.0134905	0.0415306	-0.0225443	-0.0748847	0.0226558	0.10904	-0.0260023	-0.327056
GSM1672597	0.148952	-0.122593	0.159163	-0.0144947	-0.0709642	-0.0174568	0.106268	0.181731	-0.0253968	-0.00583485	-0.00737367	-0.0607233	-0.0264548	0.1661	-0.000416511	0.139123	-0.0853265	0.0691815	0.0541455	0.0377122	0.0261536	-0.0507977	-0.0400854	-0.386176
GSM1672598	0.145796	-0.178535	0.143961	-0.0876489	-0.0517906	0.00541398	-0.012184	0.128148	-0.115884	-0.0612408	-0.0859178	-0.0564242	-0.0273643	-0.301912	-0.1229	0.0943325	-0.0363326	0.0330257	-0.0297602	-0.0130806	0.0185264	-0.0545225	-0.0329608	-0.409475
GSM1672599	0.167511	-0.23774	0.139096	0.0729761	-0.0601915	-0.0495547	0.00766851	0.0730996	-0.138932	-0.0261149	-0.043113	0.0114001	-0.0512253	-0.283856	0.054433	0.194947	-0.025161	0.0572978	0.0152069	0.0139377	-0.0313946	0.0362374	-0.0237127	-0.474226
GSM1672600	0.195101	-0.202949	0.161806	0.06496	0.0663433	-0.0152223	0.163796	0.254994	-0.0330072	-0.0359963	-0.0390461	-0.140021	-0.00488806	-0.225609	0.0275957	0.162675	-0.0165683	0.0831576	-0.0303032	0.00190727	0.0374666	0.0172475	-0.0695486	-0.284633
GSM1672601	0.162957	-0.163683	0.178217	0.100004	-0.0733598	0.00401269	0.147997	0.191617	-0.0508352	-0.0223397	0.0211604	-0.0175827	-0.0409092	-0.263275	0.115289	0.133737	-0.0393719	0.0896263	0.0229354	0.0300218	0.0532677	-0.00746648	-0.0509301	-0.282011
GSM1672602	0.224952	-0.140268	0.16849	0.0647757	-0.162532	-0.0152939	0.0150247	0.0892159	-0.0946297	-0.0656987	0.104583	-0.0228118	-0.0724223	-0.329871	0.00816627	0.136786	-0.0484891	0.0748384	-0.0324907	0.000563703	0.0130898	-0.181875	0.0594141	-0.362586
GSM1672603	0.198425	-0.192782	0.156343	0.121113	-0.101578	-0.0458227	0.141882	0.207362	-0.0634186	-0.0660613	-0.060844	-0.10922	-0.0614937	-0.310455	0.0787642	0.145846	-0.00786773	0.0694745	-0.0474006	-0.00202872	0.0402724	-0.0855698	-0.0347762	-0.297544
GSM1672604	0.0723079	-0.204616	0.130358	-0.0907405	0.0958741	0.0115279	0.153125	0.224726	-0.0316973	-0.0656425	0.00951033	-0.0439235	-0.0336464	-0.225027	-0.0598454	0.1416	0.0103526	0.0450177	0.0271965	-0.0611038	0.0548712	-0.0792666	-0.0679127	-0.274051
GSM1672605	0.122389	-0.197042	0.139608	-0.0770818	0.00644069	-0.0269469	0.0673872	0.163744	-0.0912403	-0.0982348	-0.103117	-0.0841926	-0.0454085	-0.353461	-0.0161014	0.158649	-0.0358882	0.0522511	0.000609575	-0.0240491	0.0437986	-0.0983726	-0.0462114	-0.212407
GSM1672606	0.21257	-0.228723	0.150911	0.0713951	-0.108747	-0.0149594	0.105293	0.14875	-0.0666297	-0.0420881	0.122451	0.00791946	0.0286019	-0.230269	0.0408139	0.113254	-0.0138753	0.0810009	-0.017883	0.0335396	0.0146703	-0.0367571	-0.0523324	-0.180177
GSM1672607	0.309949	-0.206063	0.174937	0.158011	-0.0401857	-0.0694221	0.111764	0.157205	-0.0721342	-0.0092012	0.0653868	0.112668	-0.0168489	-0.209009	0.218737	0.169686	-0.0856692	0.06464	-0.0222875	0.0696967	0.0320306	-0.0271343	-0.0117854	-0.232016
GSM1672608	0.0749757	-0.143721	0.152414	-0.0992068	-0.0737383	-0.0217408	0.051004	0.174495	-0.135766	-0.0351776	-0.161872	-0.0251833	-0.0786333	-0.305698	-0.140421	0.200481	-0.0101017	-0.0181045	0.00669308	-0.128583	0.0373979	-0.0942118	-0.00384989	-0.324143
GSM1672609	0.0750207	-0.165827	0.15157	-0.0929252	-0.0917535	-0.00280129	0.0521417	0.115399	-0.0469956	-0.117682	-0.0109324	-0.0792999	-0.104673	-0.316862	-0.075674	0.197371	0.0563453	-0.00584611	-0.0465672	-0.0978488	-0.0509795	-0.168033	-0.0336656	-0.287642
GSM1672610	0.165086	-0.19279	0.0911766	-0.175131	-0.0825125	0.00644121	0.0556443	0.114268	-0.128356	-0.0871505	-0.147617	-0.0838823	-0.0713044	-0.241239	-0.188684	0.175724	0.0172777	-0.0201005	-0.0920501	-0.0926628	-0.0140372	-0.140008	0.01341	-0.339773
GSM1672611	0.189181	-0.17837	0.16638	-0.0214761	-0.0304494	0.00192743	0.0849269	0.201806	-0.0792749	-0.0467232	-0.0685489	-0.0311584	-0.0462407	-0.191729	-0.0701538	0.197872	0.0514254	0.0460708	-0.0207828	-0.0956336	0.0722365	-0.0752859	-0.0150128	-0.322687
GSM1672612	0.120355	-0.130611	0.158645	-0.0174737	0.0145563	-0.0159831	0.0674665	0.208587	-0.06739	-0.13776	0.0146521	-0.0904891	-0.0988637	-0.306863	0.0340197	0.186954	0.079562	0.0443006	-0.021016	0.0197515	0.0451578	-0.0333336	-0.117363	-0.396272
GSM1672613	0.0679155	-0.139154	0.141853	-0.151911	-0.133424	0.0136984	0.0160078	0.0985895	-0.143932	-0.13348	-0.0848829	-0.0440454	-0.0991398	-0.315212	-0.0331679	0.210479	0.0214275	0.0114788	-0.00270288	-0.16162	0.000543424	-0.137991	-0.0447443	-0.331133
GSM1672614	0.0226193	-0.192074	0.137443	-0.114054	-0.197654	0.00194084	0.0362645	0.112872	-0.0525443	-0.110524	-0.0263498	-0.0607572	-0.0650136	-0.295117	-0.0866221	0.175501	0.0496543	0.0565925	-0.0291799	-0.045369	-0.0524178	-0.0483375	0.0372679	-0.277934
GSM1672615	0.133341	-0.085613	0.182416	-0.0663109	-0.12721	-0.0112078	-0.00832838	0.149198	-0.100036	0.0556364	-0.0418475	-0.0765189	-0.090029	-0.267741	-0.0635816	0.188047	0.0775934	0.0246992	0.00319288	-0.0485085	-0.0202384	-0.0608648	-0.025722	-0.426075
GSM1672616	0.126032	-0.232924	0.160069	-0.03124	-0.132246	-0.0395052	0.0575878	0.148826	-0.057726	-0.131813	-0.105899	-0.0197633	-0.049812	-0.301136	-0.0441203	0.218244	0.0729758	0.0447376	-0.0470192	-0.0953683	-0.0586361	0.039168	-0.0290751	-0.318707
GSM1672617	0.271744	-0.137166	0.16107	0.13624	-0.0403285	-0.033148	0.0712019	0.172873	-0.0915152	-0.0235062	-0.13104	0.014809	-0.0972441	-0.27774	0.0695184	0.205595	0.0768788	0.0186289	-0.0347894	8.95e-05	0.0303058	-0.119576	0.0115094	-0.223473
GSM1672618	0.035679	-0.1831	0.168801	-0.100954	0.0303612	0.0448928	0.118201	0.175632	-0.0609234	-0.100324	-0.0505964	-0.103093	-0.0791923	-0.379284	-0.129555	0.195794	0.0992509	0.0779567	0.0166671	-0.0735873	0.000616728	-0.0240269	-0.0943638	-0.325308
GSM1672619	0.0270731	-0.208506	0.15158	-0.140967	0.0407403	0.0349963	0.0617559	0.182123	-0.0620658	-0.108682	-0.0264308	-0.075571	-0.0563496	-0.237841	-0.116238	0.154894	0.0732136	0.066418	-0.0216647	-0.0832732	-0.000555312	-0.00197167	-0.107276	-0.33822
GSM1672620	0.160807	-0.180376	0.138263	-0.0456867	-0.146118	0.0113572	0.0470122	0.156824	-0.0923854	-0.0334611	0.0211565	-0.0239076	-0.0857249	-0.335113	-0.0736242	0.208662	0.00396536	0.0468926	0.0055893	-0.0534059	-0.0325275	-0.0882306	0.00797902	-0.342976
GSM1672621	0.0462948	-0.0525507	0.174244	0.00324456	-0.149863	-0.0201974	0.0504274	0.182667	-0.100132	-0.0472042	-0.0803999	0.0137818	-0.055782	-0.304048	-0.0652878	0.155917	0.0329663	0.0113331	-0.0274743	0.00685017	0.0355024	-0.147023	0.00318692	-0.277546
GSM1672622	-0.0592636	-0.202915	0.136266	-0.162602	-0.139189	0.00136352	0.0185318	0.0558631	-0.113338	-0.121875	-0.0962076	-0.15332	-0.0820969	-0.393845	-0.186609	0.186677	0.0453101	0.0178006	-0.0603236	-0.102745	-0.0424745	0.0294039	-0.063654	-0.344918
GSM1672623	0.112092	-0.260982	0.138296	-0.117758	-0.092935	-0.00372613	0.0223484	0.137048	-0.146237	-0.117401	-0.0744364	-0.0967038	-0.0790443	-0.238326	-0.149165	0.151299	0.0566003	0.0521654	-0.0429745	-0.109388	-0.041619	-0.093141	-0.0846232	-0.413455
GSM1672624	0.029724	-0.15809	0.167634	-0.114941	0.000109482	0.0425132	0.0102752	0.160459	-0.0221217	-0.09817	-0.021987	-0.0563972	-0.0695054	-0.275701	-0.0548178	0.179087	0.0910656	0.0216755	0.0500816	-0.0761408	-0.0187718	-0.00397206	-0.137353	-0.269294
GSM1672625	0.281874	-0.138235	0.154497	0.0575751	0.059762	-0.0229179	0.0581236	0.171417	-0.144539	-0.0590709	-0.0471963	0.0594886	-0.051017	-0.310941	0.0287089	0.218478	0.0116841	0.0456149	-0.0122434	-0.00260509	0.053531	-0.0133095	-0.0211485	-0.326764
GSM1672626	0.150228	-0.223044	0.165525	-0.106084	-0.0383634	0.0189148	0.0722279	0.177215	-0.030344	-0.00174622	-0.0202961	-0.0270703	-0.0910056	0.0664013	-0.0656622	0.18259	0.00114677	-0.00524865	-0.0397265	-0.0371593	0.00898725	-0.00322185	-0.0776322	-0.307834
GSM1672627	0.0383294	-0.221667	0.142428	-0.15012	-0.168917	-0.00743643	0.00738699	0.0765027	-0.0813513	-0.094553	-0.0877024	-0.0856433	-0.0584303	-0.275507	-0.163136	0.193784	0.0226552	0.056139	-0.00852015	-0.093449	-0.0351651	-0.0340581	-0.010365	-0.456946
GSM1672628	0.207705	-0.0474792	0.151826	0.0258543	0.0252791	-0.00197236	0.0790873	0.198043	-0.0508409	-0.0117245	-0.072545	-0.0617264	-0.10722	-0.289681	0.00939871	0.214863	0.0735065	0.0302606	0.00354465	-0.00597461	0.0148819	-0.180913	-0.0289172	-0.319386
GSM1672629	0.0609091	-0.110207	0.170985	0.0245532	-0.114798	0.00516415	0.0185255	0.145874	-0.0777465	-0.0473567	0.0191077	-0.0908307	-0.0810471	-0.29269	-0.0529653	0.193406	0.0348085	0.0671755	-0.0378161	-0.0589387	0.0245569	0.0706716	-0.0777109	-0.321328
GSM1672630	0.10219	-0.184548	0.155874	0.000778514	-0.0883297	-0.0142603	0.052992	0.149532	-0.112182	-0.116635	-0.0967993	-0.0135235	-0.0590979	-0.295699	-0.012616	0.186786	0.0217679	0.0098288	-0.0184554	-0.035376	-0.00402283	-0.0406851	0.0229251	-0.290457
GSM1672631	0.129802	-0.211985	0.15046	-0.0266147	-0.0475616	-0.0153136	0.0423341	0.143172	-0.113638	-0.0684241	-0.0356061	0.023779	-0.104187	-0.281235	-0.0155921	0.20865	0.00200533	0.0662649	0.000841561	-0.0819729	-0.0189837	-0.124051	-0.0577854	-0.31395
GSM1672632	0.136527	-0.232634	0.106089	-0.141979	-0.0251256	-0.0214542	0.0171476	0.110664	-0.109956	-0.10414	-0.0202786	-0.0478294	-0.0967141	-0.304534	-0.150424	0.205479	0.0250255	0.0417764	-0.00765627	-0.105952	-0.0212488	-0.0885771	-0.00591268	-0.426561
GSM1672633	0.211256	-0.0797934	0.136602	-0.0671941	-0.152648	-0.041289	0.00664998	0.150896	-0.0837315	-0.0755147	-0.0259971	-0.0425974	-0.0571238	-0.307737	-0.075064	0.177079	0.0337641	0.0375147	-0.0354582	-0.0828087	0.0118776	-0.0865686	0.00443843	-0.40598
GSM1672634	-0.0410115	-0.245571	0.181321	-0.159829	-0.245049	-0.0149109	-0.0118113	0.0248513	-0.161286	-0.150973	-0.117363	-0.0367032	-0.0337388	-0.230657	-0.171301	0.206594	0.011562	0.0369076	-0.090718	-0.119695	-0.0707977	-0.0713068	-0.0193714	-0.368217
GSM1672635	0.192622	-0.109539	0.158664	0.000946473	-0.115773	-0.0274173	-0.0220674	0.0683416	-0.117215	-0.100425	-0.0284694	-0.00706097	-0.059995	-0.276672	-0.0976995	0.198277	0.0516366	0.038612	-0.0586837	-0.091632	-0.0379005	-0.0314134	0.00616555	-0.392001
GSM1672636	0.0871912	-0.187189	0.156992	-0.0921743	-0.183143	0.0191688	0.0108526	0.116546	-0.0401276	-0.0138141	-0.0413062	-0.0531893	-0.0833444	-0.284924	-0.0464951	0.165823	0.022239	0.00232813	-0.0623201	-0.132979	0.0130555	-0.129877	-0.0599709	-0.298515
GSM1672637	0.0317152	-0.228728	0.153687	-0.116615	-0.0132484	0.00422187	0.062916	0.193929	-0.120083	-0.10243	-0.066327	-0.0720633	-0.0692832	-0.0676633	-0.103706	0.205141	0.0719509	0.0450416	0.0116954	-0.132052	-0.0366597	0.0317647	-0.10901	-0.424813
GSM1672638	0.0481974	-0.185957	0.150378	-0.0464056	-0.0828508	-0.00648942	0.034002	0.165542	-0.0792468	-0.131138	-0.0465999	0.00678319	-0.0700581	-0.274148	-0.113596	0.168069	0.0241892	0.036221	-0.0155429	-0.0714339	-0.0196448	-0.151502	-0.0518768	-0.259781
GSM1672639	0.167939	-0.201247	0.143857	0.00717867	-0.0355115	0.00550352	0.0430116	0.175595	-0.119855	-0.114231	-0.0721229	0.00893321	-0.0661841	-0.28405	-0.109702	0.176043	0.0376005	0.0545386	-0.00824319	-0.0998287	0.00914141	-0.0898792	-0.0361843	-0.200369
GSM1672640	0.267932	-0.16167	0.157359	0.0966488	-0.101749	-0.0259467	0.0874345	0.167026	-0.103852	-0.0619495	-0.0557779	0.0315352	-0.114325	-0.314921	0.0614284	0.201364	0.0215725	0.029801	-0.0249838	0.00429472	0.0046218	-0.13303	-0.0195402	-0.24852
GSM1672641	0.0311374	-0.0963892	0.159162	-0.0650439	0.0477906	0.0120449	0.163636	0.245754	-0.00332227	-0.0367684	-0.0414734	-0.161461	-0.0635124	-0.337734	-0.0652016	0.200622	0.0134769	0.0291543	0.0274404	0.00840017	0.0223985	-0.0265438	-0.0843216	-0.256286
GSM1672642	0.0951171	-0.237924	0.163705	-0.0549569	-0.0176703	-0.00158438	0.074932	0.165001	-0.121726	-0.10235	-0.0910379	-0.071612	-0.105226	-0.359188	-0.117683	0.173117	0.0201611	0.0589788	-0.0384587	-0.0724792	0.000692887	0.00648097	-0.0853146	-0.302495
GSM1672643	0.278858	-0.198971	0.122924	-0.13257	-0.023585	0.04295	0.0970176	0.173465	-0.0868806	-0.0050972	-0.0583811	-0.0343705	-0.0369535	-0.232308	-0.164557	0.164187	0.0433043	0.0537785	-0.00614993	-0.128385	0.0266023	-0.113689	-0.0424004	-0.334628
GSM1672644	0.0548105	-0.236558	0.159129	-0.0424834	-0.145683	0.00164485	0.0513841	0.0498512	-0.0898209	-0.124249	-0.0546922	-0.040671	-0.100226	-0.332589	-0.133413	0.199528	0.068263	0.0477709	-0.0636842	-0.0807107	-0.0397033	0.0495807	-0.0938209	-0.223959
GSM1672645	0.165849	-0.116993	0.164991	0.0367998	-0.101443	-0.0370795	0.0421564	0.113869	-0.114867	-0.129122	-0.0661318	0.0260773	-0.0950127	-0.387341	-0.00985279	0.221231	0.040953	0.00383886	0.0333954	-0.0490246	0.0142704	-0.144293	-0.0728837	-0.290554
GSM1672646	0.187922	-0.169304	0.175184	0.102234	-0.132741	0.0098216	0.0123226	0.144605	-0.10627	-0.122239	-0.0143097	-0.00110241	-0.104064	-0.291525	0.118801	0.230652	0.0341207	0.0190853	0.00260313	-0.0505638	0.0115515	-0.0462697	0.0298747	-0.367246
GSM1672647	0.244062	-0.0717945	0.188534	0.0550734	-0.0279237	-0.00630008	0.0995141	0.21847	-0.0536798	-0.0257709	-0.0655403	-0.0146358	-0.0585181	-0.245607	0.0216751	0.196751	0.0529227	0.0261363	0.0227693	-0.0510601	0.0354139	-0.0971703	-0.0828938	-0.344821
GSM1672648	0.206402	-0.247458	0.110312	-0.10576	-0.196045	-0.0381616	0.0274432	0.0741787	-0.102547	-0.0741018	-0.0518466	-0.0367126	-0.114166	-0.344918	-0.0912999	0.203299	-0.022321	-0.0440814	-0.113995	0.0245768	-0.0473408	-0.14568	-0.010917	-0.307543
GSM1672649	0.0967386	-0.1702	0.12609	-0.0857355	-0.16601	0.00303947	-0.0143668	0.0515211	-0.140736	-0.125195	-0.0280048	-0.166808	-0.0897371	-0.306766	-0.130745	0.194962	0.0352923	0.0101764	-0.0175558	-0.138352	0.0180517	-0.137635	-0.0378811	-0.257257
GSM1672650	0.0168795	-0.197253	0.178655	-0.0807558	-0.0654986	-0.00384536	0.0366343	0.136944	-0.146316	-0.0857238	-0.100321	-0.0670054	-0.0839254	-0.289389	-0.120855	0.203969	0.0647983	0.0233122	0.0302053	-0.11165	-0.0191825	-0.0926266	-0.0505579	-0.275798
GSM1672651	0.180114	-0.186327	0.15369	-0.0208934	-0.155353	-0.0590003	0.0236067	0.0900937	-0.0763738	-0.106374	-0.0242964	0.018801	-0.0825444	-0.268421	-0.0372936	0.18577	0.016492	0.00548781	-0.0425832	-0.0339053	-0.0506453	0.134303	-0.0173132	-0.321037
GSM1672652	0.082831	-0.258403	0.165642	-0.0605239	-0.0491965	-0.0135025	0.0758188	0.157846	-0.114951	-0.107856	-0.0793247	-0.109904	-0.0915246	-0.242112	-0.137627	0.165661	0.0358844	0.0348882	-0.0395731	-0.0991421	-0.0017271	0.0119526	-0.0982034	-0.360742
GSM1672653	-0.00104682	-0.133296	0.160775	-0.0870467	-0.0514542	-0.00551584	0.0182671	0.096992	-0.0565375	-0.108346	-0.181965	-0.145199	-0.0597719	-0.318998	-0.0877602	0.196487	0.0621451	0.0124795	0.0486904	0.0190694	-0.0335595	-0.0635749	-0.0615892	-0.374333
GSM1672654	0.149924	-0.155542	0.145429	-0.0426225	-0.0952913	-0.00351876	0.0245229	0.130617	-0.0873884	-0.157926	-0.0667559	-0.0593793	-0.0852452	-0.382681	-0.0935065	0.203606	-0.0016857	-0.0146242	-0.0483542	0.0405232	-0.0226639	-0.1089	0.00318667	-0.338317
GSM1672655	0.243384	-0.115926	0.178416	0.102256	-0.0381987	0.00453914	0.0614543	0.220276	-0.117311	0.0104495	-0.136738	0.0802376	-0.0918876	-0.247258	0.0645241	0.197384	0.0363386	0.0391852	0.00784701	-0.0367449	0.0484368	-0.0235914	-0.0282392	-0.28405
GSM1672656	0.201939	-0.0272772	0.158067	0.0177532	-0.0210911	0.0115314	0.078847	0.16976	-0.0374034	-0.054611	-0.0794096	-0.0994026	-0.0922123	-0.113775	0.0266899	0.205459	0.0806935	-0.0144212	-0.00254634	-0.0564168	0.0298752	-0.159434	-0.0250723	-0.247743
GSM1672657	0.0447818	-0.250819	0.130308	-0.131514	-0.090525	-0.0206533	0.0446374	0.128277	-0.104191	-0.14837	-0.126473	-0.0222834	-0.0823872	-0.325017	-0.190713	0.202722	0.0427225	0.0511696	0.000899991	-0.109598	-0.0105186	-0.0602536	-0.049368	-0.311135
GSM1672658	0.0834178	-0.205489	0.181926	0.00975565	0.0229414	0.00361906	0.0776591	0.154285	-0.144078	-0.0908249	-0.109407	-0.0347487	-0.085731	-0.269683	-0.0862211	0.165051	-0.015228	0.0102022	0.00628072	-0.112691	-0.0361286	0.0561565	-0.0699573	-0.315406
GSM1672659	0.216172	-0.0499039	0.192457	0.12196	-0.0961508	-0.0320307	0.0714912	0.198972	-0.108485	0.0118361	-0.0690056	0.0305389	-0.0690608	-0.315018	0.107107	0.188796	0.0651041	0.0629244	-0.0239991	0.0195589	0.00628123	-0.0473786	-0.0285453	-0.306669
GSM1672660	0.160013	-0.220685	0.182036	-0.0146938	-0.0569498	-0.0322873	0.0336531	0.159534	-0.154815	-0.0460482	-0.0763373	-0.0247981	-0.0592782	-0.252791	-0.0501088	0.225158	0.0185077	0.00512382	-0.0671756	-0.0579116	-0.0322006	0.053483	0.0302634	-0.471022
GSM1672661	0.070013	-0.170406	0.130258	-0.101647	0.00214422	0.0173094	0.0973091	0.126258	-0.0419199	-0.0717961	-0.088248	-0.0995657	-0.0661123	-0.324629	-0.0191484	0.224141	0.0616737	0.0156714	0.00298934	-0.0660822	0.00820214	-0.10162	-0.0717551	-0.343947
GSM1672662	0.0357483	-0.107274	0.135632	-0.116381	-0.0749333	0.0140848	0.0533542	0.151753	-0.13297	-0.119004	-0.0944355	-0.0660567	-0.0621908	-0.311232	-0.090214	0.186272	0.0393092	0.0291496	-0.00316222	-0.125401	-0.038901	0.0491364	-0.0684126	-0.336763
GSM1672663	0.0923504	-0.275744	0.148866	-0.0837613	-0.183829	0.0058742	0.0391623	0.0491877	0.0147137	-0.12927	0.100359	-0.0682113	-0.0757431	-0.296379	-0.101717	0.188189	0.0523736	0.0816211	0.0482597	-0.0933776	0.0178527	-0.122507	0.00377694	-0.282982
GSM1672664	0.183399	-0.114663	0.141945	-0.0535027	-0.157715	-0.0107876	-0.00363704	0.118162	-0.15327	-0.150295	-0.0296004	0.000550894	-0.0813279	-0.339385	-0.0391128	0.184905	0.00699441	0.0271936	-0.0408216	-0.058535	-0.0238387	-0.0873297	-0.046728	-0.278614
GSM1672665	0.191134	-0.136829	0.185915	0.0461368	-0.0321057	-0.00970748	0.0965401	0.225256	-0.0490309	-0.117736	0.00736087	0.00797138	-0.086879	-0.268809	-0.0165987	0.191906	0.0183094	0.0291684	-0.0410803	-0.0601573	0.00206683	-0.107068	-0.0730551	-0.275022
GSM1672666	-0.0127111	-0.224891	0.171754	-0.0101135	-0.00179832	0.00704323	-0.0168675	0.092096	-0.0639029	-0.031778	-0.0260569	0.0167309	-0.0568693	-0.079701	-0.0998994	0.19239	0.0364582	-0.00785215	0.00220293	-0.110557	-0.0190351	-0.0315844	0.0174569	-0.306087
GSM1672667	0.00883638	-0.27579	0.173189	-0.0756048	-0.0933006	0.0112865	0.0290922	0.0658639	-0.0176344	-0.0488919	0.061234	0.0311684	-0.0638434	-0.315115	-0.13992	0.183578	-0.00531249	0.022397	-0.00831217	-0.114579	-0.038337	-0.0430141	0.00599278	-0.440054
GSM1672668	0.0903581	-0.254144	0.139437	-0.0961111	-0.0860885	-0.0119856	0.0913289	0.17543	-0.0103753	-0.0572164	0.000706713	-0.0587507	-0.0634763	-0.197651	-0.160362	0.191352	0.00659218	0.0193441	-0.0250898	-0.129983	-0.0182961	0.00778788	-0.0682391	-0.31395
GSM1672669	0.272287	-0.0386167	0.194083	0.137026	0.0328047	-0.0354964	0.0891153	0.261387	-0.120123	-0.107238	-0.0970842	0.0297268	-0.0730008	-0.233861	0.18663	0.21411	0.0566129	0.0637785	-0.0376482	-0.00213649	0.0480973	-0.110795	-0.0263434	-0.331715
GSM1672670	0.075981	-0.243451	0.120966	-0.0699202	-0.18653	0.0128106	0.0111401	0.0922068	-0.0942197	-0.0879788	0.0178672	-0.0688137	-0.0557894	-0.245996	-0.136037	0.181548	-0.00212743	0.0224004	-0.0725347	-0.143561	-0.0150242	-0.132024	-0.0108566	-0.267741
GSM1672671	0.202689	-0.12323	0.17411	0.0397132	-0.0959928	-0.00287734	0.0811019	0.193692	-0.0714849	-0.0144396	-0.0874133	0.0104045	-0.0739795	-0.272401	0.00772102	0.210199	0.0486893	0.00983785	-0.0522799	-0.0370332	0.00455106	-0.163599	-0.0227532	-0.468207
GSM1672672	0.222037	-0.208952	0.128296	-0.125493	-0.0474716	-0.0266418	0.00533202	0.101087	-0.0828951	-0.117955	-0.135959	-0.113613	-0.106101	-0.27308	-0.151194	0.192685	0.0303169	0.0180164	-0.0051467	-0.112668	-0.0165546	-0.0967765	-0.0201804	-0.287254
GSM1672673	-0.0829988	-0.260161	0.171409	-0.137766	-0.16025	0.00439177	-0.0252681	0.0728875	-0.0541681	-0.179946	-0.0157164	-0.0702826	-0.0581574	-0.348219	-0.140866	0.173866	0.0473966	0.0514036	-0.0389353	-0.0779393	-0.093311	0.052325	-0.0774389	-0.295505
GSM1672674	0.148363	-0.125935	0.157195	0.0567227	-0.108436	-0.0198513	0.0685735	0.140616	-0.0588762	-0.071947	-0.120286	-0.0895748	-0.0895267	-0.295894	0.000149993	0.209244	0.0653417	0.0564028	-0.0297682	-0.0570814	-0.030661	-0.0680572	-0.0591122	-0.29269
GSM1672675	-0.0546591	-0.213566	0.136397	-0.11865	-0.123839	0.0104774	-0.035321	0.0408978	-0.137469	-0.128775	-0.00204933	-0.0852934	-0.0723276	-0.284924	-0.178245	0.200366	0.00888164	0.0292532	-0.0121461	-0.1582	-0.0477941	-0.172006	-0.00834932	-0.451995
GSM1672676	0.0334408	-0.141956	0.156755	-0.095373	-0.195993	0.00123069	-0.0465152	0.0713479	-0.127976	-0.174092	-0.0288763	-0.10497	-0.0537502	-0.286283	-0.168136	0.205263	-0.0195263	0.0128546	0.00251806	-0.142727	-0.0684061	-0.0352417	0.0312097	-0.30201
GSM1672677	-0.0389135	-0.112148	0.1669	-0.0730459	-0.0560647	-0.00425789	0.0690708	0.158972	-0.04092	-0.0865754	-0.0282647	-0.0806387	-0.0320554	-0.264246	-0.0316019	0.187045	0.0553015	0.0643932	-0.042247	0.0071012	0.00579619	-0.154158	-0.0386408	-0.325794
GSM1672678	0.159381	-0.239597	0.135449	-0.0714066	-0.0354734	-0.0304788	0.0480235	0.17212	-0.137472	-0.114512	0.00512893	0.020552	-0.0829762	-0.217843	-0.00128221	0.191347	0.0261883	-0.00352914	-0.0256965	-0.0395707	-0.0185243	-0.142804	-0.00999407	-0.240074
GSM1672679	0.0622293	-0.148148	0.144669	-0.0767265	-0.185172	-0.0172923	-0.0361299	0.0231495	-0.0678618	-0.0995797	-0.0138266	-0.0147864	-0.0910014	-0.261916	-0.127806	0.212421	0.0410201	0.0348014	0.0392261	-0.10018	-0.0248094	-0.171282	0.0498982	-0.478012
GSM1672680	0.138855	-0.243889	0.174866	0.0291316	-0.0345801	-0.0070616	0.0439987	0.129599	-0.154408	-0.0934368	-0.0922235	-0.00938155	-0.0632645	-0.293078	-0.0521354	0.185201	0.0198177	0.0816093	0.00437512	-0.0967336	0.00153947	-0.0657066	-0.0543225	-0.300068
GSM1672681	0.206008	-0.121739	0.126794	-0.0492845	-0.117425	0.00190883	0.0463598	0.108387	-0.106489	-0.106738	-0.0981092	-0.0345636	-0.11311	-0.26978	-0.0471006	0.219103	0.0213394	0.0108641	0.0369638	-0.142628	0.0376896	-0.165526	-0.0318298	-0.345403
GSM1672682	0.249994	-0.115461	0.159392	0.0572605	-0.113001	-0.0104087	0.0365963	0.141859	-0.0963864	-0.0379104	-0.110708	0.0606534	-0.106289	-0.292884	0.0104241	0.216705	0.0524819	0.0067861	-0.0299519	-0.054251	0.012803	-0.134382	-0.0212585	-0.470634
GSM1672683	-0.0408566	-0.220824	0.11364	-0.152017	-0.169976	-0.00801089	0.00603505	0.0919231	-0.0718088	-0.112414	-0.0763471	-0.109443	-0.0901841	-0.318513	-0.197377	0.201809	0.0392565	0.00374627	-0.0177137	-0.0948227	-0.0585049	-0.0643239	-0.0365042	-0.330259
GSM1672684	0.188228	-0.0667566	0.15402	-0.0511012	-0.099217	-0.0181003	0.0663227	0.127991	-0.049029	-0.0456563	-0.130475	-0.0864818	-0.086424	-0.292205	-0.0820938	0.218253	0.0595058	-0.0342367	0.00752965	-0.101724	-0.0169557	-0.200467	0.0141797	-0.293952
GSM1672685	0.157335	-0.257296	0.140638	-0.0959257	-0.268956	-0.0674956	-0.00803697	0.0404119	-0.142999	-0.135574	-0.0621494	-0.0988666	-0.0667132	-0.385497	-0.153304	0.205619	0.061672	0.0144874	-0.0754724	-0.070377	-0.0503255	-0.121667	0.0131724	-0.425299
GSM1672686	0.104621	-0.147483	0.129661	0.0491486	0.0728608	-0.0177452	0.122723	0.149828	-0.0225736	-0.0746198	-0.119151	-0.0781707	-0.0956193	-0.100087	0.0684459	0.217781	0.0306155	0.0221339	0.0233899	-0.0027507	0.0152462	-0.173401	-0.0637487	-0.274634
GSM1672687	0.177213	-0.14809	0.13831	-0.0678059	-0.00712868	0.000154931	0.0460532	0.232582	-0.0603293	-0.0617429	-0.0245895	-0.0503869	-0.0440408	-0.317057	-0.00408189	0.206342	0.0133396	0.057477	-0.00750955	-0.00526621	0.0222386	-0.15374	-0.0823331	-0.220949
GSM1672688	-0.0203258	-0.239336	0.126285	-0.0853028	-0.147405	-0.0557307	0.00144842	0.0593172	-0.226071	-0.167657	-0.0992415	-0.102483	-0.0355962	-0.328026	-0.16353	0.200892	0.015528	0.00343339	-0.0738233	-0.130783	-0.0736662	-0.22252	-0.0303619	-0.25182
GSM1672689	0.120714	-0.109861	0.133646	-0.0452424	0.0164419	-0.0392233	0.0531757	0.249994	-0.145257	-0.0402425	-0.0734814	-0.0271324	-0.0620828	0.0963984	0.0415017	0.188909	-0.00768845	0.0443521	-0.0397093	0.0161092	0.0535602	-0.025159	-0.0472336	-0.270653
GSM1672690	-0.00647544	-0.138979	0.177801	0.0428261	0.0218934	-0.0277567	0.0894894	0.176731	-0.196645	-0.145247	-0.0153444	-0.0641706	-0.0802677	-0.259878	-0.0206708	0.188139	-0.0219062	0.0185577	-0.0388623	-0.0154593	-0.0051965	-0.226264	-0.0614153	-0.264926
GSM1672691	0.0965374	-0.202425	0.152798	-0.0820449	0.159179	0.0231537	0.11503	0.182462	0.00970593	-0.0361573	-0.0574147	-0.052612	-0.0375498	-0.0137851	-0.131338	0.175462	-0.0131219	-0.00110993	-0.0136436	-0.0580363	0.0420886	-0.170958	-0.0584435	-0.251141
GSM1672692	0.224769	-0.162518	0.151922	0.00417762	-0.00531759	0.00303097	0.0472135	0.15383	-0.0887993	-0.0417795	-0.0916606	0.001023	-0.0516372	-0.237453	0.0474455	0.20957	0.0186067	0.00495851	0.00182746	-0.0713424	0.0770044	-0.0863885	-0.0501403	-0.141734
GSM1672693	0.175205	-0.240914	0.151472	0.148798	-0.101494	-0.0565436	0.0691135	0.149618	-0.146806	-0.0736602	0.0346566	0.0441141	-0.0756325	-0.275701	0.0934154	0.201397	0.0103774	-0.00620982	-0.014999	-0.00197561	0.02338	0.0764459	0.0487658	-0.260946
GSM1672694	0.14949	-0.196851	0.157668	0.093358	0.042863	-0.0411584	0.107779	0.25812	-0.125954	0.0330735	-0.0574559	0.0221608	-0.0624103	0.101544	0.0906057	0.199703	-0.0135631	0.075453	-0.0213191	0.0339721	0.0553994	-0.0826676	-0.0193339	-0.344918
GSM1672695	0.198103	-0.168076	0.152382	-0.0911367	-0.19686	0.0276565	0.0888081	0.188873	0.0288568	-0.0178412	-0.112383	-0.0798285	-0.0416874	-0.293467	-0.0743017	0.204598	0.0430071	0.0109397	-0.00556165	-0.0602658	0.0224682	-0.0237858	-0.0565586	-0.361907
GSM1672696	0.110571	-0.174654	0.136736	-0.131547	0.00980229	0.0168636	0.104383	0.207001	-0.0424833	-0.0351745	-0.0314398	-0.0369338	-0.0573462	-0.1628	-0.121443	0.173948	0.0260375	0.0105268	-0.0650316	-0.0622063	0.0502364	-0.033091	-0.0687517	-0.297835
GSM1672697	0.014355	-0.241125	0.137038	-0.0760433	-0.165713	-0.0378659	0.0479339	0.155342	-0.13183	-0.059511	-0.0927428	-0.00868526	-0.0409631	-0.25648	-0.106437	0.196297	-0.00956945	0.0290839	-0.0902594	-0.0203022	-0.0333931	-0.187863	0.0141379	-0.407242
GSM1672698	0.151462	-0.16891	0.183051	0.0935831	0.146957	-0.0223005	0.140706	0.236078	-0.0796373	-0.0655297	-0.093459	-0.00356426	-0.0771109	-0.176294	0.0674586	0.184757	-0.0134722	0.0257272	-0.00691644	0.0164375	0.0630821	-0.122051	-0.00798073	-0.27774
GSM1672699	0.213262	-0.139937	0.14991	0.092599	0.199178	-0.0540056	0.105209	0.20986	-0.166084	-0.0138456	-0.123269	0.0626896	-0.0243231	0.209494	0.0937017	0.193285	-0.00331658	0.046559	-0.0253039	0.000857059	0.0944584	-0.173705	-0.00924422	-0.192991
GSM1672700	0.0627053	-0.165237	0.15001	-0.0237935	0.0273043	-0.05005	0.0893877	0.226873	-0.0047345	-0.045865	-0.0690619	-0.08495	-0.031591	-0.174255	0.00135413	0.17479	-0.00637356	0.0635253	-0.0255953	0.0398957	0.0321272	-0.0519245	-0.045542	-0.299777
GSM1672701	0.196784	-0.171838	0.161644	0.151338	0.0675778	-0.0380437	0.0686476	0.21992	-0.211644	-0.0797214	-0.0425512	0.0177047	-0.0482851	-0.268323	0.114345	0.223612	0.00353838	0.0409611	-0.0590191	0.00203668	0.0987307	-0.188265	0.00779703	-0.296282
GSM1672702	0.0992117	-0.0970596	0.145624	-0.0104528	-0.0221978	-0.0490186	0.026842	0.223249	-0.0850648	0.0198337	-0.0519817	-0.00776624	-0.0464076	-0.0897	-0.0132428	0.186462	0.00697032	0.0199408	-0.0100144	-0.0199198	0.0738334	-0.09407	0.0140258	-0.317736
GSM1672703	0.208191	-0.134152	0.173471	0.186621	-0.0470655	-0.0418813	0.0527835	0.168417	-0.108882	0.00130203	0.00667353	0.0359314	-0.0395486	-0.243957	0.0696776	0.201656	-0.0088233	0.050341	-0.041096	0.0516457	0.115199	-0.154611	-0.00742382	-0.382487
GSM1672704	0.12509	-0.127712	0.154191	0.0739174	0.0427293	-0.012016	0.0803061	0.162209	-0.0175276	-0.0241254	-0.106403	0.0100519	-0.0616629	-0.119891	0.0983393	0.177902	-0.0174191	0.0265537	0.0361312	0.02296	0.0437694	-0.102303	-0.00839825	-0.303854
GSM1672705	0.242197	-0.129262	0.189282	0.133095	-0.0208163	-0.0272095	0.111084	0.20946	-0.0943632	-0.0459752	-0.0589914	0.0264449	-0.0736324	-0.139501	0.111611	0.207968	0.0287306	0.033358	0.0153453	0.0455507	0.0656815	-0.0734548	-0.0479522	-0.252791
GSM1672706	0.0100303	-0.221345	0.134062	-0.099056	-0.0580188	-0.0694919	0.00188588	0.110516	-0.0869727	-0.073827	-0.0160763	-0.00347592	-0.0431644	-0.282594	-0.119297	0.19358	-0.0347315	-0.0168846	0.0246045	-0.048537	0.0314774	-0.0615457	0.014884	-0.275313
GSM1672707	0.176014	-0.156007	0.148624	-0.023785	0.0124768	-0.0105178	0.0415459	0.176347	-0.141856	-0.0804882	0.0485874	0.0423644	-0.0865167	-0.295408	-0.0586919	0.188346	-0.00844356	-0.000646137	-0.00208245	-0.0320729	0.0307478	-0.138265	-0.0167644	-0.313562
GSM1672708	-0.0687964	-0.149957	0.175732	-0.117319	-0.129291	0.00578143	0.0454877	0.105445	-0.122919	-0.0784634	-0.0073507	-0.0781079	-0.0496444	-0.228813	-0.0870734	0.160281	-0.0398523	-0.014668	-0.0633235	-0.0673614	0.0304228	-0.129929	-0.0576051	-0.345792
GSM1672709	0.0763474	-0.137133	0.142289	0.0458424	-0.110094	-0.0630984	0.0557085	0.210207	-0.145641	0.0143761	-0.122441	0.0107241	-0.0626712	-0.351034	-0.000602495	0.191278	-0.0197969	0.00523515	-0.0603152	0.0332125	0.0322536	-0.197874	-0.0338781	-0.247063
GSM1672710	0.0661736	-0.209484	0.1393	-0.0168601	-0.00335663	0.00895438	0.103946	0.162218	-0.0270591	-0.083664	0.000627308	-0.0721486	-0.0592791	-0.35317	-0.0106264	0.215389	-0.000778887	0.0498517	-0.0339344	-0.0307485	0.0576892	-0.180606	-0.0468983	-0.297932
GSM1672711	-0.0179929	-0.129854	0.126125	-0.0890096	0.0493358	0.00317376	0.133142	0.197088	-0.0501511	-0.0666786	-0.103038	-0.0610595	-0.0625583	-0.315892	-0.0218406	0.186476	0.0120968	0.0103803	0.0414035	-0.0276753	0.0269382	-0.115321	-0.0781619	-0.302689
GSM1672712	0.216789	-0.183812	0.131633	0.03337	-0.136043	-0.0459697	0.0890699	0.207049	-0.0631431	-0.0489396	-0.0750541	-0.0835812	-0.0785092	-0.285409	-0.00113865	0.217763	-0.0185604	-0.0265781	-0.0371304	-0.0265222	0.00905293	-0.192659	-0.0273752	-0.285506
GSM1672713	0.144383	-0.21861	0.126035	-0.0189832	-0.029041	-0.0691364	0.0863287	0.152284	-0.139783	-0.100144	-0.0829972	-0.0149619	-0.0773094	-0.189108	-0.0270952	0.187245	-0.00845911	0.00828985	-0.0251404	-0.0259656	0.0211611	-0.208475	0.000282041	-0.250073
GSM1672714	0.235734	-0.173132	0.124952	-0.0796069	-0.0106818	-0.0342761	0.0873109	0.192219	-0.108818	0.0892683	-0.0817474	-0.0427778	-0.0720079	-0.242015	-0.0911653	0.159105	-0.0405334	0.0170426	-0.00538665	-0.0287688	0.0589086	-0.236126	-0.0169294	-0.294437
GSM1672715	0.0144084	-0.113161	0.12336	-0.0265527	0.0512013	-0.0362215	0.128107	0.268259	-0.10451	-0.0682425	-0.0990694	-0.00937003	-0.0764354	-0.288127	-0.0392	0.190451	-0.023941	0.0345195	-0.057971	-0.0121997	0.0187451	-0.123116	-0.0220489	-0.286865
GSM1672716	0.040714	-0.245381	0.141937	-0.14166	0.10204	-0.034528	0.167556	0.229934	-0.0692462	-0.0375573	-0.0857861	0.0285264	-0.0492454	0.157946	-0.0903286	0.192817	-0.0492176	0.0281755	-0.0524069	0.0374212	0.0146856	-0.111857	-0.0883964	-0.251723
GSM1672717	0.158523	-0.163886	0.132417	0.0348884	-0.00916836	-0.0794881	0.0292085	0.133583	-0.0917828	-0.0429747	-0.142495	-0.139956	-0.0686844	-0.293272	-0.0535769	0.185921	-0.0193778	-0.0396046	-0.0191265	-0.0685491	-0.0429448	-0.0801865	0.0290355	-0.325211
GSM1672718	0.0592766	-0.193984	0.153017	-0.0910165	-0.0386421	-0.0274859	0.0234129	0.178667	-0.146652	-0.115394	-0.108661	-0.0440536	-0.0527397	-0.302883	-0.136584	0.196789	-0.0213	0.00963472	-0.0674162	-0.0910796	0.0238123	-0.178559	-0.0572151	-0.289778
GSM1672719	0.188992	-0.147982	0.163184	-0.0668429	-0.0749542	-0.0314468	0.0352727	0.199968	-0.0925616	-0.0829222	-0.135465	-0.0452048	-0.0865204	-0.104747	-0.0139716	0.178531	-0.00507409	0.0232238	-0.0110227	-0.0302317	0.0293351	-0.178801	-0.0495317	-0.232113
GSM1672720	0.135603	-0.183699	0.117506	-0.0133314	-0.082111	-0.0523614	0.019762	0.0812415	-0.169409	-0.139399	-0.0621681	-0.0349571	-0.0794664	-0.253082	-0.0352086	0.19713	0.00584899	0.0120083	-0.00422922	-0.042786	0.0175139	-0.196133	0.0168128	-0.319969
GSM1672721	0.0503549	-0.257406	0.167048	-0.035132	-0.0597189	-0.012546	0.0535596	0.155084	-0.0580872	-0.0461124	-0.02031	-0.00232118	-0.0632494	-0.366858	-0.063261	0.181505	-0.00962825	0.06867	0.0604022	-0.0116459	-0.00894352	-0.0814804	0.0136967	-0.269294
GSM1672722	-0.0814897	-0.19013	0.182412	-0.121068	-0.238607	0.0226868	-0.00239466	0.105808	-0.0853521	-0.0467027	0.0163676	-0.0263474	-0.0622801	-0.284438	-0.1045	0.148443	-0.0178872	0.00485303	-0.0689329	-0.0529558	0.0222142	-0.0923031	-0.0713977	-0.286768
GSM1672723	0.167499	-0.222454	0.154497	-0.0708043	-0.0186909	-0.0308543	0.0654565	0.125438	-0.0742357	-0.0453519	-0.0357695	-0.0587356	-0.0948957	-0.284535	-0.0622363	0.204445	-0.000420183	0.00851293	-0.0559756	-0.0844298	-0.015963	-0.107908	-0.000341017	-0.295408
GSM1854798	0.170697	-0.195479	0.14583	0.016839	0.00851083	-0.000838396	0.106176	0.169756	-0.0826877	-0.049757	0.00167374	0.0170492	-0.0298082	0.100573	0.00536645	0.165551	0.00592474	0.022909	0.0141416	-0.160455	-0.0193992	0.026683	-0.0880399	-0.326182
GSM1854799	0.144329	-0.160574	0.162032	0.0106381	0.100155	-0.0272952	0.100228	0.255403	-0.11054	-0.0492917	-0.0857633	0.0448491	-0.0324928	0.221823	0.0389631	0.189678	-0.0484015	0.0487524	-0.027417	0.0123066	0.0399418	-0.0433715	0.0186178	-0.164935
GSM1854800	0.173005	-0.159445	0.143527	0.0481372	-0.0594111	-0.0279593	0.0300648	0.153559	-0.221043	-0.0602746	-0.0692442	-0.0776552	-0.0727636	0.0145617	0.00778574	0.178002	0.0395949	0.0102797	-0.00700781	-0.0831352	0.00487471	-0.187227	0.0719308	-0.213863
GSM1854801	0.225729	-0.184063	0.146676	0.0636743	-0.0677361	-0.0513243	0.131722	0.170508	-0.0658497	-0.0411638	-0.0237977	-0.0642142	-0.057652	0.109989	-0.0017902	0.181126	0.0347707	0.0111335	-0.0412457	-0.0289118	-0.00981128	-0.105932	-0.0516898	-0.290748
GSM1854802	0.189991	-0.221465	0.163852	0.0680903	-0.0651132	-0.0511178	0.035377	0.126732	-0.164297	-0.10877	-0.0441924	0.0263728	-0.0763269	0.0129114	-0.0101951	0.2021	-0.0242752	0.0463927	0.00504538	0.0256365	0.0113376	-0.10012	0.00137711	-0.298029
GSM1854803	0.0846659	-0.234703	0.142738	-0.111003	-0.0837832	0.0107549	0.138705	0.27195	-0.14127	-0.0882398	0.0432101	-0.0582916	-0.0874023	0.2857	-0.119466	0.159238	-0.0163338	0.0371909	-0.0722286	-0.0842956	-0.0394827	-0.0273688	-0.0654847	-0.401806
GSM1854804	0.174268	-0.224851	0.129088	-0.0178326	0.0101641	-0.00667266	0.152657	0.244097	-0.0692525	-0.0576656	0.067769	-0.0712069	-0.0488417	0.271624	0.00419401	0.160736	-0.00153975	0.0513637	-0.0509217	-0.0724952	0.0118199	-0.0575134	-0.0579264	-0.281429
GSM1854805	0.1119	-0.228494	0.120042	-0.122724	-0.185074	-0.0655923	0.0305976	0.105912	-0.0931001	-0.0382042	-0.113769	-0.0098347	-0.0248357	0.0873702	-0.108534	0.165149	-0.0398212	0.0195358	-0.0740688	-0.00618905	-0.0053715	-0.0820371	0.0267194	-0.316474
GSM1854806	0.0701663	-0.102426	0.172255	-0.0464913	-0.0104445	0.0197088	0.0610882	0.154179	0.029047	-0.0495257	-0.0716396	-0.0643105	0.0144193	-0.016212	-0.0653195	0.197018	0.0610458	0.0904492	0.0126625	-0.00613681	0.00730001	-0.0676721	-0.0623024	-0.482672
GSM1854807	0.21115	-0.0916372	0.174282	-0.0389866	-0.111141	-0.0370513	0.0294792	0.169861	-0.155461	-0.0959427	0.0214642	-0.131442	-0.0379633	0.0756237	-0.0101151	0.196324	0.0530202	0.0735145	-0.0337896	-0.0154692	0.021591	-0.234088	-0.00509331	-0.340744
GSM1854808	0.164865	-0.174982	0.200752	0.079605	-0.0264735	-0.000113585	0.0886233	0.213824	0.012453	-0.0123066	-0.0237951	-0.100414	0.00799666	0.200466	0.0319379	0.187489	0.022532	0.074112	-0.0387649	0.0349783	0.0431274	-0.129661	-0.0441669	-0.347539
GSM1854809	0.0104626	-0.178743	0.192923	-0.0418274	-0.00945383	0.0230087	0.0985507	0.150738	0.0260437	-0.0979781	-0.140514	-0.104392	-0.061287	0.158528	-0.0838904	0.180365	0.00907128	0.0246513	-0.00404731	-0.0751925	2.9e-05	0.0139219	-0.0847559	-0.376954
GSM1854810	0.192973	-0.0992775	0.155633	0.0740251	-0.161712	-0.0617884	0.031588	0.190978	-0.147212	-0.0831517	-0.0559787	0.0448349	-0.0566542	-0.0406757	0.0916613	0.196297	-0.0208549	0.0883609	-0.00591343	0.0231735	0.00980437	-0.143278	0.0314341	-0.129405
GSM1854811	-0.0058623	-0.158666	0.167149	-0.145982	0.027857	0.00673849	0.0940363	0.0773635	-0.103213	-0.125059	-0.0818144	-0.0517368	-0.0280711	-0.0300942	-0.0949067	0.191604	0.0182125	0.0369026	-0.0114144	-0.0653319	-0.00406889	0.104573	-0.13174	-0.299097
GSM1854812	0.0327987	-0.205972	0.175618	-0.0929827	-0.0475533	0.0302099	0.0355345	0.0860548	-0.0270164	-0.172931	0.076108	-0.0543824	-0.0494015	0.00514513	0.000640997	0.19217	0.0133969	0.0440076	-0.0586532	-0.0127381	-0.0648193	-0.000666972	-0.0603673	-0.313756
GSM1854813	0.0975913	-0.0802512	0.181287	0.0333174	0.0149638	-0.0122506	0.101835	0.180154	-0.0663541	-0.144901	-0.00286395	-0.0720681	-0.0575221	0.0391224	0.113588	0.226863	0.0656018	0.0815466	0.0413634	0.00117487	0.0426594	-0.044606	-0.076573	-0.265702
GSM1854814	0.154969	-0.242096	0.14341	-0.129326	-0.055329	0.010752	0.0882897	0.122088	-0.13432	-0.117943	-0.0758295	-0.0504619	-0.0621346	0.181147	-0.069076	0.185998	0.0483207	0.0383413	-0.0372352	-0.0337753	0.0153297	-0.0780234	-0.0501892	-0.358897
GSM1854815	0.254676	-0.0584663	0.200181	0.130803	-0.124468	-0.0416895	0.0443579	0.144414	-0.0907416	-0.0370672	-0.117318	0.0563753	-0.0415822	0.0363072	0.0886771	0.192116	0.0240142	0.0659497	0.0152356	0.0198066	0.0580699	-0.0827215	0.0101652	-0.30366
GSM1854816	0.179142	-0.191148	0.167507	0.0538157	-0.12615	0.00989497	0.10977	0.1651	-0.0853953	-0.125146	-0.0236987	-0.0144535	-0.0674634	0.0509659	0.0361499	0.186425	0.0118983	0.0439552	-0.0322528	-0.0599116	-0.00833902	-0.0836482	-0.0111755	-0.4053
GSM1854817	0.199305	-0.206896	0.125434	-0.170916	-0.197312	-0.00307408	-0.0202041	0.0342038	-0.120706	-0.0989278	0.025583	-0.0690117	-0.0661732	0.130764	-0.240702	0.208304	0.0732265	0.0371001	-0.0520332	-0.120593	-0.0632228	0.0410677	1.93e-05	-0.424328
GSM1854818	0.265845	-0.0926244	0.14601	0.112239	-0.0377768	0.000183769	0.057922	0.176639	-0.164293	-0.0639257	-0.112015	0.0610816	-0.0724373	0.148141	0.121847	0.187315	-0.0062193	0.0683958	0.00152557	-0.00572104	0.0527459	-0.0138366	0.0287031	-0.153092
GSM1854819	0.242835	-0.203753	0.176754	0.0399616	-0.0713431	-0.0273084	0.0675457	0.186893	-0.137808	0.0318326	0.0685378	0.00761577	-0.0653336	0.242889	0.0312169	0.156464	-0.0284708	-0.00122888	-0.00654156	-0.00774877	0.0549874	0.0109599	-0.0698397	-0.255412
GSM1854820	0.209674	-0.0969598	0.204439	0.207908	-0.0287447	-0.0396177	0.0346194	0.140796	-0.112262	-0.0228323	-0.0305076	0.11388	-0.0371461	0.194641	0.227204	0.20736	0.0229393	0.0804028	-0.0205716	-0.0217748	0.053059	-0.0990688	-0.00898823	-0.156975
GSM1854821	0.133859	-0.0914515	0.139132	-0.0553693	-0.044098	-0.0315054	0.0827674	0.204317	-0.117102	-0.0897752	-0.0663377	-0.103963	-0.0911093	-0.0163091	-0.00645606	0.166687	0.0264763	0.0649438	-0.0269971	-0.00841099	0.0161813	-0.0646154	-0.0763672	-0.268518
GSM1854822	-0.0946957	-0.217358	0.131768	-0.134191	-0.0705781	-0.0158182	0.016414	0.0608707	-0.104991	-0.11017	0.0466267	-0.0549495	-0.053336	0.0474711	-0.149053	0.136046	-0.0108583	0.0140525	-0.0275003	-0.0412817	-0.0190183	0.0229689	-0.0843824	-0.387438
GSM1854823	0.072687	-0.188164	0.119747	-0.177975	-0.193363	-0.0530138	0.00352785	0.0563121	-0.123357	-0.119925	0.00779347	-0.110958	-0.055816	-0.0578585	-0.154782	0.140287	-0.0401405	-0.0294126	-0.0569031	-0.0409245	0.0308869	-0.0651433	0.00951513	-0.357441
GSM1854825	0.215474	-0.204507	0.103462	-0.0920466	0.00333822	-0.00244804	0.060129	0.141365	-0.140046	-0.114648	-0.0124522	-0.0381403	-0.0177492	0.150083	-0.0174076	0.21058	0.00405426	0.037357	-0.0100259	-0.0888141	0.0242933	-0.141517	-0.0468174	-0.274925
GSM1854826	0.100025	-0.212969	0.203767	0.0138758	0.227161	0.028833	0.155956	0.227528	0.0483828	0.0106519	-0.0374474	-0.0680676	-0.035547	0.164838	-0.0117465	0.144714	0.0073679	0.0279678	-0.0180645	-0.111043	0.0104593	0.219274	-0.0999519	-0.292399
GSM1854827	0.157867	-0.252183	0.159034	0.0606257	0.0720174	-0.0680674	0.0314693	0.195164	-0.133778	-0.122385	-0.117305	0.0196213	-0.0166085	0.124163	0.0216423	0.205198	-0.0154882	0.0677922	-0.0582909	0.0264025	0.07854	-0.064633	0.0340169	-0.270653
GSM1854828	0.130821	-0.207726	0.170076	-0.072477	-0.117893	-0.00363957	0.104105	0.203486	-0.0594998	-0.0864806	-0.018733	-0.0536326	-0.0405425	0.016212	-0.107598	0.195723	-0.0129301	0.0416022	-0.0253981	-0.0419221	0.0264759	-0.0277428	-0.0592158	-0.339676
GSM1854829	0.0847067	-0.168601	0.110616	-0.0541335	-0.010806	-0.0558366	0.063978	0.179754	-0.134991	-0.11676	-0.0845726	-0.0627128	-0.017633	0.229978	-0.100391	0.151697	-0.0557814	0.0842023	-0.0635937	-0.0486137	0.0144548	-0.0136504	-0.0382133	-0.264343
GSM1854830	-0.216642	-0.240589	0.148663	-0.213647	-0.138268	0.0199369	-0.00663212	0.0718103	-0.197827	-0.11497	-0.0778704	-0.0633955	0.043076	0.185613	-0.159413	0.224521	0.0296398	0.0815771	-7.74e-05	-0.0185261	-0.0130489	-0.127035	8.33e-05	-0.394816
GSM1854831	0.0665582	-0.268462	0.104314	-0.219006	-0.0910612	-0.0193362	-0.00291675	0.0474945	-0.10386	-0.0396587	-0.00926697	-0.104379	-0.082941	0.172313	-0.189284	0.163242	-0.0701729	0.0332696	-0.0548712	-0.0157317	-0.0845648	0.0577678	0.000844111	-0.385399
GSM1854832	0.171747	-0.151818	0.16499	-0.00672865	0.0828138	-0.0293063	0.0751331	0.145644	-0.0379138	-0.096062	-0.0396854	-0.0498794	-0.0536398	-0.0150471	-0.0196391	0.150484	-0.0184946	0.0242125	0.0447483	-0.0868488	-0.0190059	0.00785877	-0.0877985	-0.321425
GSM1854833	0.140064	-0.265954	0.1822	0.201968	-0.0156438	-0.0275548	0.120471	0.189777	0.0184564	0.0924511	-0.074646	0.019655	0.000567415	0.292593	-0.0169559	0.214627	0.0275844	0.0968563	-0.0582303	0.0494776	-0.0213739	0.0353694	-0.0932708	-0.430929
GSM1854834	0.0977455	-0.235071	0.156462	-0.086197	-0.0144752	-0.00454586	0.0960009	0.231588	-0.0914309	-0.0847599	-0.106701	-0.0167759	-0.0515916	-0.0244636	0.0227515	0.186343	0.00742074	0.0362026	-0.0273523	-0.121099	0.0166522	-0.00118339	-0.0834164	-0.257159
GSM1854835	0.169316	-0.13935	0.152747	0.0313739	-0.0552333	-0.0231932	0.117054	0.170044	-0.0975929	-0.091888	0.0214517	5.39e-05	-0.0440938	0.119212	0.0843848	0.183568	-0.00295594	0.0617071	0.0338874	-0.0367171	0.0353728	0.0241159	-0.00626426	-0.295991
GSM1854836	0.0672519	-0.0794646	0.191238	0.103471	0.025222	0.00386775	0.137302	0.20674	0.0318182	0.0286629	-0.0165312	0.0171863	0.0224733	0.286186	0.0463112	0.155877	-0.0228618	0.076129	-0.0203122	0.0611725	0.0505549	-0.0814176	-0.03166	-0.240947
GSM1854837	-0.0160224	-0.233026	0.122285	-0.165307	-0.0320976	-0.0139925	0.0870975	0.159933	-0.0372551	-0.159583	0.0324511	-0.128585	-0.0299905	0.0127172	-0.12979	0.139343	-0.0182597	-0.0210482	-0.0292503	-0.117218	-0.0990072	-0.00172779	-0.0563164	-0.268129
GSM1854838	0.043885	-0.244101	0.0872406	-0.142241	-0.00611627	-0.065564	0.119728	0.237519	-0.0805576	-0.0312131	-0.0710192	-0.0332309	-0.0370463	0.19503	-0.115534	0.15832	-0.0348975	0.0132761	-0.0446401	0.00695765	0.00176772	-0.0669157	-0.0101076	-0.211436
GSM1854839	0.103106	-0.213769	0.172188	-0.0549636	0.0557775	-0.0187666	0.125155	0.186913	-0.0227683	-0.0536835	-0.0994271	-0.123044	-0.0615587	0.211436	-0.0037257	0.205809	0.0106922	0.0448486	0.0236608	-0.0217538	-0.0268163	0.0709302	-0.059195	-0.349772
GSM1854840	0.175531	-0.0810394	0.2151	0.167767	-0.034067	0.0307052	0.132513	0.222335	-0.0243955	0.107759	0.0394018	-0.0169325	-0.0542384	0.255509	0.112693	0.172149	0.00468094	0.0765757	-0.0225952	-0.00810393	0.0514255	0.012279	-0.0759781	-0.273177
GSM1854841	-0.0773806	-0.189373	0.158171	-0.0555583	-0.209115	-0.0371144	-0.0272431	0.0326409	-0.11882	-0.0653486	-0.0460247	-0.0292502	-0.0260462	0.0561111	-0.0795768	0.195416	-0.0360715	0.0211605	-0.0106504	0.00877847	-0.0376116	0.0927798	-0.0789974	-0.263664
GSM1854842	0.173448	-0.144507	0.200972	0.0786828	0.0155184	-0.0103378	0.120707	0.177187	0.0376883	-0.0475244	0.00643238	-0.0610556	0.0334503	0.0290263	0.0857233	0.170763	0.030732	0.126116	-0.0112	0.0424493	0.00699614	0.0207315	-0.0464098	-0.324823
GSM1854843	0.064215	-0.208928	0.169641	-0.0319199	0.00699789	0.0276665	0.192853	0.273579	-0.000292714	-0.0307686	-0.0853142	-0.092137	-0.00520362	-0.00194156	-0.0418441	0.194217	0.0244646	0.0495975	-0.0141729	-0.0174586	0.0367608	-0.0556167	-0.031009	-0.396758
GSM1854844	0.0066099	-0.236995	0.150803	-0.111796	-0.213509	0.00283619	0.0269278	0.0780555	-0.017561	-0.0843089	-0.0387447	-0.105764	-0.0416894	-0.192409	-0.182998	0.192494	0.0321745	0.058959	-0.0172253	-0.0237432	-0.0883185	-0.0782947	-0.0454018	-0.459082
GSM1854846	0.149258	-0.292676	0.196362	0.00585237	-0.133071	-0.0053018	0.0747143	0.130252	-0.0667059	-0.0370323	-0.0307236	-0.0769658	-0.0656193	0.0724202	-0.131645	0.189172	-0.0110283	0.0458901	-0.0434207	0.000479039	-0.0164813	0.0724873	-0.0641122	-0.425881
GSM1854847	0.0674034	-0.123039	0.209441	0.143748	-0.043484	-0.00206454	0.060565	0.203803	-0.0536087	-0.0797326	-0.101725	-0.0352914	-0.00745654	0.0855257	0.0828932	0.206769	0.0553681	0.128803	-0.0656285	0.119687	0.0675966	-0.166239	-0.0350762	-0.408795
GSM1854848	0.162977	-0.164034	0.170255	0.0727981	0.00127341	-0.00682958	0.144875	0.285904	-0.0147631	0.0310442	-0.0428111	-0.0412206	-0.0674783	0.315795	0.0308714	0.190227	-0.00511603	0.0967794	-0.0396681	0.0524661	-0.0215144	-0.0715988	-0.0478465	-0.332783
GSM1854849	0.197459	-0.193333	0.175926	0.182373	0.0419177	0.00384898	0.113757	0.213599	-0.039602	-0.0658236	-0.0492616	0.0192099	-0.0429248	0.0783419	-0.0396635	0.178259	0.0380147	0.0452282	-0.0236281	-0.0323385	0.0283621	-0.0605632	-0.0627759	-0.332298
GSM1854850	0.0125682	-0.27997	0.161376	-0.198302	0.0364077	0.00296894	0.0760626	0.107415	-0.0544543	-0.0898945	-0.0610565	-0.104995	-0.0572292	-0.00271818	-0.181533	0.182654	0.0240543	0.0257388	-0.0660732	-0.0659068	0.0105524	0.0177381	-0.0557171	-0.438501
GSM1854851	0.116228	-0.204836	0.179519	-0.0316434	0.0843715	0.016429	0.1187	0.181602	-0.0639405	-0.104931	-0.0658836	-0.0511405	-0.0614134	0.0663042	0.0178646	0.231871	0.0453557	0.0927889	0.0307976	0.0286618	0.0101713	-0.077619	-0.00870485	-0.262499
GSM1854852	0.0384061	-0.1307	0.203821	-0.0505308	0.229781	0.0476243	0.139256	0.159198	0.0654976	-0.0651666	-0.0440909	-0.104588	-0.0418813	-0.112416	0.0540725	0.218106	0.0803848	0.104962	0.0329808	-0.00263185	0.0307325	-0.0048526	-0.0543763	-0.260557
GSM1854853	0.222271	-0.0836759	0.160758	0.0938832	-0.184371	-0.0491952	-0.00400638	0.154374	-0.144819	-0.025442	-0.0777917	0.0221881	-0.0687617	-0.00097078	0.0628414	0.210538	0.0361551	0.0633321	-0.0522895	0.0517852	0.0238626	-0.142082	0.0740594	-0.365693
GSM1854854	0.0150146	-0.19387	0.165266	-0.0567167	0.134041	0.0523041	0.115572	0.200301	0.0464974	-0.0438503	0.00621077	-0.0873914	-0.0485083	0.00912533	0.00501145	0.161881	0.00705346	0.0541428	0.0241939	-0.0160282	0.0218623	0.107257	-0.060871	-0.310552
GSM1854855	-0.0342433	-0.0738327	0.127598	-0.0244263	-0.0359825	-0.012743	0.0559286	0.186949	-0.088769	-0.063505	-0.0731983	-0.00519405	-0.0452704	-0.0208718	-0.0316239	0.163798	-0.0195812	0.0395884	-0.065626	0.0357759	0.00186684	-0.0749444	0.0223283	-0.366275
GSM1854856	0.190978	-0.236987	0.152452	0.0591121	-0.128921	-0.034647	0.0845653	0.217553	-0.118978	-0.0472464	-0.061192	0.107415	0.000567209	-0.0293175	0.0337951	0.186324	-0.00772897	0.0543005	-0.0269103	0.0354564	0.0116236	-0.0495652	-0.0188747	-0.272692
GSM1854857	0.163809	-0.147894	0.17681	-0.0905446	-0.139101	-0.0227327	0.0105612	0.126912	-0.0472566	-0.0750015	-0.129984	-0.0191056	-0.0640322	0.0177653	-0.0829274	0.150689	-0.00142641	0.0698846	0.0453862	0.032499	-0.00177913	-0.0411321	-0.0503902	-0.375498
GSM1854859	0.160644	0.011194	0.145653	0.0288595	0.065884	-0.0318497	0.116057	0.16393	-0.0406809	-0.0528343	-0.0409496	-0.00720013	-0.0541834	0.130279	0.138628	0.189616	-0.00224474	0.0878116	-0.0240443	0.0587915	0.0294994	-0.10047	0.00272334	-0.201534
GSM1854860	0.204517	-0.17663	0.158124	0.0144293	-0.0623942	0.0307864	0.0626805	0.16568	-0.0215527	-0.0684394	0.0372117	-0.0103444	-0.0513338	0.0424231	0.0358124	0.184589	-0.0129062	0.0155366	-0.0558567	-0.0310005	0.02466	-0.110964	-0.0472373	-0.367537
GSM1854861	0.143047	-0.153154	0.14785	0.0151048	0.0129124	-0.0048746	0.045715	0.195279	-0.148617	-0.0524651	-0.118113	0.0175297	-0.0415739	0.09834	-0.0314933	0.190724	0.0196653	0.0339058	-0.0489258	-0.0600723	0.0407519	-0.261256	0.0333226	-0.297932
GSM1854862	0.196125	0.0426094	0.213797	0.140609	-0.0956369	-0.0372631	0.0989353	0.180508	-0.106343	-0.0116783	-0.11961	0.0136902	-0.0518332	0.0292205	0.173219	0.246463	0.0519224	0.0892785	0.00173173	0.0465206	0.0408457	-0.1342	-0.024009	-0.210077
GSM1854863	0.0384633	-0.215738	0.160267	-0.153153	-0.0321159	0.00571375	0.00110866	0.0978719	-0.0456254	-0.114854	0.0639228	-0.182123	-0.0610039	0.192506	-0.0883868	0.195755	0.0337604	0.0256844	0.0299559	-0.000795231	0.000866466	-0.0187142	-0.119867	-0.326182
GSM1854864	0.09733	-0.0905881	0.187729	-0.0492782	0.107373	0.0229201	0.156127	0.218826	0.0182647	-0.0443056	-0.097701	-0.0797625	-0.0299198	0.0561111	-0.0156116	0.148795	0.000126522	0.0467082	0.0255759	-0.0247749	-0.0322282	-0.0893451	-0.0477449	-0.30929
GSM1854865	-0.0549165	-0.195124	0.126058	-0.0100111	-0.0783104	-0.000884238	0.0705254	0.205149	-0.0348349	-0.0792345	-0.00900079	0.0149225	0.0171991	0.026211	0.0269297	0.160059	-0.000533179	0.0808998	-0.0366605	0.0249576	0.0225135	-0.154892	-0.0122148	-0.341132
GSM1854866	0.153762	-0.19617	0.14852	0.0573112	-0.16259	-0.0397163	0.0228032	0.119196	-0.0725646	-0.0603355	0.021864	0.0204673	-0.102541	-0.129405	-0.0542983	0.156202	-0.0225975	-0.00830226	-0.0587673	-0.101276	0.0144909	0.00101474	-0.00938842	-0.355402
GSM1854867	0.118653	-0.126464	0.149127	-0.0742273	-0.0950949	-0.00686242	0.00922659	0.0658631	-0.125398	-0.104931	0.0110354	-0.0366022	-0.0337652	0.00048539	-0.00280987	0.188036	0.0123578	0.0622585	-0.0179842	-0.0556635	-0.0199183	-0.0837945	-0.014777	-0.33987
GSM1854868	0.232547	-0.269027	0.128131	0.043631	-0.0732027	-0.0454801	0.00598767	0.12321	-0.16293	-0.0305745	-0.00860135	0.0493241	0.010697	0.118629	-0.0613237	0.189249	-0.0520432	0.052136	-0.0533695	0.0070583	0.0418749	-0.186084	0.00177888	-0.30065
GSM1854869	0.0767806	-0.208897	0.183997	-0.0397535	-0.0307436	-0.0380773	0.0612185	0.129683	-0.0720558	-0.114023	0.0431546	-0.0487754	-0.0331719	0.0481507	-0.0985968	0.181359	-0.00240528	0.0477562	0.000661574	-0.0662772	-0.0505305	0.0406938	-0.0669559	-0.373653
GSM1854870	-0.0514774	-0.238517	0.121834	-0.175665	-0.0858544	-0.0273224	0.00672653	0.17801	-0.168856	-0.136175	-0.0261297	-0.0341086	-0.0370333	0.131249	-0.152173	0.158414	-0.00581219	0.0468321	-0.0357416	-0.0297868	0.047708	-0.00155567	-0.0673376	-0.310649
GSM1854871	0.0288731	-0.213349	0.178911	-0.0482753	-0.067775	-0.0306215	0.0676218	0.0771395	-0.114584	-0.167168	0.0475346	-0.0747052	-0.0509959	0.00776624	-0.0368833	0.155118	0.0146167	0.00893502	0.0169023	-0.155009	-0.0573137	-0.0425101	-0.0972382	-0.371711
GSM1854872	-0.168317	-0.249015	0.131075	-0.124448	-0.0773156	-0.0403563	0.076836	0.222116	-0.0331815	-0.0451122	-0.0992312	-0.0249638	0.0540192	0.11494	-0.171256	0.128203	-0.0662073	0.102664	-0.0247021	-0.0814535	0.0139767	-0.127101	-0.0702162	-0.353946
GSM1854873	-0.11353	-0.263272	0.116283	-0.0860862	-0.237293	-0.00339087	0.0192577	0.0462514	-0.06752	-0.147127	-0.0915289	0.00925534	0.00822977	0.11261	-0.110926	0.147825	-0.102328	0.0154004	-0.107575	0.0165113	0.0118681	-0.226315	-0.0436073	-0.297253
GSM1854874	0.118379	-0.24264	0.151472	-0.00930237	-0.0567477	-0.00403681	0.119631	0.240756	0.0324634	0.0149648	-0.0294929	-0.0510316	0.013056	0.360353	-0.0535047	0.142043	-0.020599	0.111218	-0.0626194	-0.00220514	-0.00361823	-0.0723928	-0.0929396	-0.323075
GSM1854875	0.199174	0.0050811	0.194759	0.134263	-0.0774335	-0.0599099	0.0479483	0.175094	-0.0802953	-0.0921691	-0.105899	-0.0110213	-0.0607029	0.0600913	0.167534	0.231172	0.0537647	0.114176	0.039083	-0.0181503	0.0461594	-0.114856	-0.0254275	-0.215901
GSM1854876	0.058559	-0.195278	0.100971	-0.0997005	-0.0147593	0.0901923	0.0542867	0.0716826	-0.0921033	-0.074196	0.0209124	-0.00533458	-0.090022	0.0449471	-0.0369428	0.148865	-0.0267752	-0.0337754	-0.0285654	-0.108771	-0.0392682	-0.175168	0.00456055	-0.284147
GSM1854877	0.14362	-0.0238922	0.17202	0.084948	-0.00106944	-0.0332633	0.133054	0.22121	-0.05269	-0.0329042	-0.00543773	0.0216039	-0.0551835	0.138336	0.0900859	0.154432	-0.0147225	0.0391087	0.0171525	-0.0629926	0.0442225	0.0681439	-0.0578688	-0.141637
GSM1854879	0.0506526	-0.148325	0.164993	-0.0154016	-0.119671	-0.0213943	0.073954	0.0917409	-0.0499458	-0.0314331	-0.0422771	-0.116498	-0.0592091	-0.0635861	0.0200141	0.199982	0.0464941	0.0508206	-0.0275853	-0.0136225	0.00897105	-0.061257	-0.0317912	-0.336181
GSM1854880	0.176233	-0.0802759	0.137752	0.045022	-0.122839	-0.050124	0.0523819	0.151415	-0.150672	-0.0409993	-0.0684354	0.0349769	-0.0671772	0.124745	0.0550705	0.179681	0.0134784	0.0320717	-0.0436383	-0.0179116	0.000546233	-0.022284	-0.0170096	-0.219202
GSM1854881	0.00554026	-0.0696071	0.15464	0.0122711	-0.079756	-0.036374	0.0328667	0.0984851	-0.0400947	-0.116581	-0.0325015	0.0042781	-0.0518762	0.151345	0.0307058	0.191023	0.00417487	0.0447321	-0.056658	0.0292614	-0.00894224	-0.0497297	-0.0673113	-0.289292
GSM1854882	0.126939	-0.165913	0.169229	0.0819936	0.0262419	-0.0257361	0.108791	0.203794	-0.0948012	-0.136811	-0.128634	-0.0485387	-0.038984	0.0143675	0.0267934	0.167353	0.0242837	0.0678629	0.0091927	-0.0173936	0.0685505	-0.105734	-0.0399266	-0.222309
GSM1854883	0.0845818	-0.140147	0.141114	-0.047814	-0.234405	-0.045723	-0.0628448	-0.00213696	-0.269624	-0.212814	-0.141933	-0.145841	-0.0631099	-0.0531987	-0.100262	0.178383	0.0265693	0.148855	-0.0336029	0.00291687	-0.0634994	-0.230262	-0.00488418	-0.304436
GSM1854884	0.203183	-0.108285	0.162672	0.152234	-0.0128742	-0.0255309	0.0921398	0.2267	-0.103437	-0.0208362	-0.0593683	0.0742358	-0.0513425	0.0703815	0.128769	0.188281	-0.00926673	0.0495273	-0.0292744	-0.0434333	0.0296075	-0.120071	-0.00483192	-0.224056
GSM1854885	-0.119818	-0.155609	0.137773	-0.0566817	-0.0496034	-0.00531185	0.0901184	0.169434	-0.0394745	-0.0678897	-0.0456506	-0.0140172	-0.020727	0.0864965	-0.0710094	0.15859	-0.0379754	0.0440534	-0.0393999	-0.0480066	-0.041778	0.0307788	-0.0703509	-0.336472
GSM1854886	-0.0803574	-0.223934	0.126133	-0.137525	-0.186262	-0.0187392	0.012379	0.0762189	-0.119717	-0.0985325	-0.0109029	0.0493443	-0.0639711	0.110572	-0.136711	0.176498	-8.37e-05	0.0813911	-0.132228	-0.00191632	-0.0445559	-0.115804	-0.0218697	-0.310455
GSM1854887	0.0462831	-0.241371	0.16272	-0.104424	0.0118909	-0.0475415	0.0594629	0.123455	-0.105419	-0.106569	0.000106644	-0.0921872	-0.037635	0.0600913	-0.138208	0.171599	-0.0499365	0.0166708	-0.0392826	-0.0403426	-0.0352631	-0.0936553	-0.0464981	-0.469663
GSM1854888	-0.00476003	-0.164828	0.175341	0.0400946	-0.0427794	-0.0133212	0.105814	0.193521	-0.0557825	-0.0934307	-0.0883671	-0.0700718	-0.0595818	0.127949	-0.029074	0.184583	-0.000258016	0.0460139	-0.0463728	-0.00677575	-0.0245464	0.0417009	-0.105641	-0.327347
GSM1854889	0.227067	-0.189779	0.134244	0.014271	-0.235473	-0.0232273	0.0305643	0.115842	-0.0968002	-0.0949374	0.0336549	-0.0354737	-0.0580976	0.178041	-0.0710253	0.158247	-0.0477022	0.0338137	-0.0305109	-0.098556	0.0274421	-0.089777	-0.0115764	-0.363266
GSM1854890	0.173	-0.118858	0.14974	0.0168236	-0.0946543	-0.0201666	0.055994	0.148887	-0.0547251	0.0129229	0.0291441	0.00404343	-0.0272629	0.146491	0.00989696	0.163238	-0.0330763	0.0696403	0.022241	-0.0373642	-0.013355	-0.0141811	-0.0440792	-0.360839
GSM1854891	0.22414	-0.22923	0.130727	0.0153481	-0.158756	-0.0339478	0.04345	0.162315	-0.0922575	0.0258159	-0.0634328	-0.0206297	-0.0402155	0.187069	-0.120484	0.0947556	-0.0666361	0.053209	-0.0618402	-0.029478	0.0587325	-0.168409	-0.0168971	-0.393748
GSM1854892	0.139362	-0.239262	0.121002	-0.0104334	-0.118364	-0.0545576	0.0956842	0.134316	-0.113599	-0.0125949	0.0447772	-0.0892211	-0.0773264	0.0263081	-0.141998	0.144204	-0.0692919	0.0583757	-0.0521216	-0.0380267	-0.0154508	0.0516848	0.0383245	-0.333074
GSM1854893	0.189294	-0.186244	0.154631	0.0158131	0.0230001	-0.0304502	0.0274712	0.239404	-0.127021	-0.0405891	-0.125398	0.0111309	-0.04649	0.184351	-0.0230226	0.150439	-0.0490972	0.0980366	-0.0288434	0.0241486	0.0609271	-0.0311172	-0.0364556	-0.294923
GSM1854895	0.0569253	0.0169399	0.16606	-0.0103068	-0.00394175	-0.0437735	-0.00434324	0.105855	-0.0591579	-0.0810413	0.032355	0.0310054	-0.0238932	0.17076	0.0216394	0.170829	-0.00210451	0.0795098	-0.0494221	-0.0213206	0.0282965	-0.118024	1.59e-05	-0.310455
GSM1854896	0.177101	-0.248724	0.155016	-0.0485183	-0.0354676	0.0219087	0.105629	0.237355	-0.0859006	-0.0543152	-0.0371901	-0.116211	-0.0596032	0.32094	-0.0176089	0.163759	-0.00912021	0.0256739	-0.0673442	-0.00756804	-0.0130233	-0.0944697	-0.0651964	-0.373847
GSM1854897	0.113088	-0.183295	0.153688	-0.00675222	-0.0379506	-0.0211372	0.0946885	0.213191	-0.134286	-0.126925	-0.012733	0.0149331	-0.0164759	0.1362	-0.00433385	0.168214	0.0306046	0.0826977	-0.0175649	0.0187792	0.0398399	-0.0491355	-0.0770893	-0.256383
GSM1854898	0.0742136	-0.179961	0.150869	-0.168663	-0.0227813	-0.0398463	0.0884283	0.176072	-0.0660036	-0.126235	-0.0912644	-0.143974	-0.0855577	-0.027376	-0.0891788	0.153436	0.0312509	0.0527673	-0.00773904	-0.114096	-0.0188393	0.0247716	-0.057291	-0.298515
GSM1854899	0.170505	-0.201797	0.161864	-0.0574963	-0.0902092	0.0145228	0.102443	0.215612	-0.0536727	-0.0244562	0.0596087	-0.0524816	-0.0209722	0.062227	-0.0169585	0.16579	-0.0119308	0.0284112	-0.0590178	-0.0358765	0.0320625	-0.0919084	-0.0480098	-0.382973
GSM1854900	0.167548	-0.197519	0.172371	0.0151589	-0.00951432	-0.016717	0.128546	0.287049	0.0175223	0.0292037	-0.0369777	-0.0743553	0.00252818	0.282303	-0.00877408	0.169861	-0.00255699	0.0530077	-0.0480592	0.0137465	-0.0020133	-0.0663362	-0.116353	-0.320746
GSM1854902	-0.0105199	-0.177262	0.135288	-0.0205756	0.0673764	-0.0180095	0.107083	0.150158	0.0457478	-0.0313148	0.0375642	-0.105263	0.00770668	0.108145	-0.0828537	0.153891	-0.013988	0.0675408	0.0218741	-0.0669713	0.00227772	-0.0334674	-0.0782963	-0.40598
GSM1854903	0.264488	-0.181098	0.174451	0.0987819	-0.0925282	-0.0210811	0.0423072	0.186135	-0.137237	-0.0387173	-0.0430222	0.0427788	-0.00243193	0.0459179	0.0171028	0.195319	-0.0367299	0.0388123	-0.0703745	0.0301688	0.0303763	-0.196477	-0.0080372	-0.134065
GSM1854904	0.196302	0.0429123	0.21149	0.115343	-0.103826	-0.0382699	0.0304749	0.0976082	-0.142461	-0.145141	-0.029574	0.0444158	-0.051031	-0.0153383	0.0873158	0.214853	0.0299639	0.0735227	0.0130093	0.0194419	-0.0213394	-0.184473	-0.0259613	-0.290846
GSM1854906	0.0147973	-0.225736	0.150337	-0.141333	-0.221385	0.00155422	-0.0304084	0.0805581	-0.0719086	-0.0931664	-0.0666722	-0.0999515	-0.0329803	0.0165033	-0.101955	0.162516	0.0321858	0.0409898	-0.0258122	-0.0152549	-0.0384809	-0.130309	-0.0201916	-0.415008
GSM1854907	0.115379	-0.249783	0.168611	-0.0670666	-0.0960564	0.011411	0.0764684	0.187295	-0.124166	-0.0914628	-0.00962367	-0.109872	-0.0203152	0.0526163	-0.12371	0.159245	0.000552477	0.0493168	-0.0535785	-0.0800438	-0.040818	0.0834124	-0.0667821	-0.39802
GSM1854908	0.232564	-0.103968	0.197125	0.126077	0.0378139	-0.0101995	0.129927	0.189802	-0.0660831	-0.0660642	0.0270134	0.0266516	-0.0406042	0.227357	0.194839	0.201501	0.00459204	0.0758084	-0.00739215	-0.00469463	0.0600008	-0.154537	-0.0230115	-0.0756237
GSM1854909	0.150886	-0.196236	0.111531	-0.109674	0.0564457	-0.0353556	0.101614	0.195611	-0.0193729	-0.100494	-0.0785064	-0.0688957	-0.0361019	0.329774	-0.039106	0.137317	-0.0426078	0.0127102	0.0291879	-0.0955002	0.0262917	-0.103861	-0.0597413	-0.169304
GSM1854910	0.265405	0.020465	0.203908	0.192805	-0.0640852	-0.0288812	0.0733805	0.163818	-0.108624	-0.0336154	-0.0244951	-0.0245739	-0.0358752	0.172605	0.114265	0.185424	0.0258819	0.0324876	0.0149283	-0.0149316	0.0503932	-0.155279	-0.0395848	-0.275119
GSM1854911	-0.0323686	-0.206089	0.171816	-0.192325	-0.138704	-0.0130701	0.0443659	-0.00558448	-0.0522729	-0.154779	0.07063	-0.0440204	-0.0277404	-0.126007	-0.24761	0.205289	0.060536	0.00998633	-0.00254466	-0.109136	-0.0651775	-0.0677964	-0.0575586	-0.371226
GSM1854913	0.190121	-0.102881	0.173725	0.0587185	-0.102305	-0.0131759	0.0457935	0.153967	-0.0988525	-0.0310946	-0.0511283	0.00913979	-0.0126474	0.0639744	0.0228698	0.159231	-0.0305248	0.0500854	-0.0133743	-0.0498343	0.0490676	-0.0951664	0.000597869	-0.28007
GSM1854915	0.174724	-0.137377	0.140012	-0.0259509	-0.0391799	0.00332781	0.101787	0.193112	-0.0489121	0.0246678	0.00862538	0.0055426	-0.0164586	0.15649	0.0435646	0.169365	-0.0158173	0.045431	-0.0140236	0.0106907	0.0249994	-0.180819	-0.0328651	-0.20134
GSM1854916	0.0272584	-0.207607	0.151665	-0.0960388	-0.165825	0.00634769	0.00357939	0.137189	-0.0924148	-0.0856131	-0.0632645	-0.00273986	-0.035166	0.188622	-0.0986491	0.155494	-0.0344709	0.0449936	-0.0854498	-0.0178327	-0.0180624	0.0188062	-0.0537825	-0.352781
GSM1854917	0.0319573	-0.19761	0.139347	-0.0949793	0.0198197	-0.00862126	0.219659	0.260371	0.0108028	-0.0359065	-0.0987068	-0.0956411	-0.0792385	0.0669838	-0.117796	0.125929	-0.0119838	0.064441	-0.0252166	-0.0322547	-0.00907779	0.0681027	-0.0882749	-0.394039
GSM1854918	0.225303	-0.164259	0.228699	0.181538	-0.0765802	0.0267936	0.103855	0.17648	-0.0249107	-0.0669598	0.123772	-0.00900255	-0.0657366	0.0718377	0.148595	0.209662	0.0804894	0.0604229	0.0367789	-0.0609374	0.0904146	0.0381741	-0.0571294	-0.306863
GSM1854919	0.00357702	-0.223729	0.132472	-0.106027	0.0336226	0.0151998	0.0707611	0.204964	-0.0452096	-0.0830444	0.0547073	-0.0341573	-0.0217593	0.113872	-0.0868461	0.183066	0.0320916	0.104163	0.0102349	-0.0587102	0.00619979	-0.143859	-0.0899375	-0.415299
GSM1854920	0.081887	-0.210871	0.160529	-0.092948	-0.050991	0.0084928	0.114576	0.180381	-0.106195	-0.111615	-0.0397086	-0.116425	-0.0554352	-0.0130084	-0.0672892	0.166561	0.024615	0.0422713	0.0390749	-0.103458	-0.00626242	0.00198868	-0.109101	-0.363363
GSM1854921	0.0873801	-0.192611	0.153848	-0.0733293	-0.0252744	-0.0145732	0.0371259	0.117102	-0.216884	-0.10498	-0.0410491	-0.0701571	-0.0384515	0.0872731	-0.0170021	0.132339	-0.00412758	0.0487667	-0.0702537	-0.0663613	0.0233571	-0.100969	-0.00403835	-0.304242
GSM1854922	0.101985	-0.0302265	0.174743	0.109151	0.0123586	-0.0263032	0.171015	0.272275	-0.0530598	-0.0416722	-0.0843825	-0.0602555	-0.0381246	0.120862	0.152379	0.187041	0.0390786	0.119485	-0.0228633	0.0611817	0.00627759	-0.0682864	-0.0755621	-0.308611
GSM1854923	0.147242	-0.169163	0.198276	0.0539396	-0.0514837	0.0174596	0.111556	0.208691	-0.0426226	-0.0276009	0.0322828	-0.0121395	-0.0155882	0.11892	0.0671999	0.140828	0.0183825	0.110621	-0.0147487	-0.0219821	0.0621815	-0.00941974	-0.0683972	-0.199301
GSM1854924	0.209878	-0.155266	0.188957	0.159971	0.142789	0.00655982	0.173559	0.241905	-0.0166457	-0.0363695	-0.0414662	-0.0350337	-0.0347247	0.157169	0.0997116	0.184821	0.0274065	0.0891693	0.0126241	-0.0368768	0.0278058	-0.0365658	-0.10543	-0.184836
GSM1854925	0.177711	-0.130773	0.153885	-0.0026599	-0.195521	0.0189985	0.0714756	0.074772	-0.0519847	-0.107013	0.0587449	-0.0308291	-0.075586	-0.0737792	0.00164136	0.195967	-0.0165015	0.066601	-0.0151316	-0.0437232	-0.00414053	-0.10677	-0.0298602	-0.337055
GSM1854926	0.170777	-0.138963	0.0979096	0.0201819	0.0703634	-0.0259476	0.164055	0.238661	-0.0777606	-0.075952	-0.0589967	0.0166893	-0.0473839	0.168333	0.0602139	0.141715	-0.0430582	0.085947	-0.0152784	-0.00780493	0.00663393	-0.0080573	-0.00233913	-0.130084
GSM1854927	0.304421	-0.0936644	0.17906	0.106644	-0.0175662	-0.0497095	0.0676305	0.185853	-0.093769	-0.106892	-0.0711622	0.00761799	-0.0338086	0.061062	0.121323	0.184933	0.00589248	0.0579098	0.00580966	-0.00978828	0.0405565	-0.155176	-0.00550421	-0.173867
GSM1854928	0.0910294	-0.0268051	0.174524	0.0197352	-0.0296801	-0.0095465	0.140362	0.220373	-0.0426737	-0.0753739	-0.125531	-0.0383337	-0.0516939	0.281332	0.0371726	0.164295	0.0173099	0.0680792	0.0439529	-0.0346564	0.034833	-0.0720843	-0.0729732	-0.260654
GSM1854929	0.0191917	-0.119837	0.159772	-0.0324855	-0.046326	-0.0486316	0.0765238	0.15428	-0.0147051	-0.0647509	-0.0921622	-0.00115743	-0.00349109	0.12824	-0.0242807	0.187665	0.00859527	0.0608004	-0.00326041	0.0247009	0.0773065	-0.169038	-0.056248	-0.364625
GSM1854930	0.0536476	-0.207949	0.16588	-0.0319153	-0.0642372	0.00312779	0.0917841	0.20572	-0.00903317	-0.0333179	-0.0184757	-0.0330907	-0.0011884	-0.0185419	-0.0354522	0.157854	-0.0185603	0.053677	-0.0670248	-0.00871034	0.00404482	-0.110736	-0.0879089	-0.39336
GSM1854931	0.201492	-0.0977327	0.186724	0.124337	0.0799733	-0.000452932	0.154237	0.220917	0.0313681	-0.0301936	-0.0833919	-0.0243196	-0.0493495	0.270556	0.147617	0.175867	0.0356603	0.0743263	0.0528041	0.021004	0.0487039	-0.0349951	-0.0561317	-0.217746
GSM1854932	0.078345	-0.161286	0.139098	-0.0501573	-0.111676	-0.0342061	0.0196994	0.184719	-0.0727693	-0.0566027	-0.137579	-4.83e-05	-0.0302781	-0.0276672	0.0294952	0.151908	-0.0321552	0.0803863	-0.0439383	0.0451643	0.0435452	0.0302298	-0.0362113	-0.290069
GSM1854933	0.166104	-0.202957	0.119447	-0.110956	-0.196979	0.0111308	-0.036518	0.0439759	-0.166981	-0.130586	0.0194897	-0.0481103	-0.0317014	-0.0158237	-0.154759	0.143623	-0.0326815	0.0859738	-0.0306125	-0.0446976	-0.0839139	-0.108226	0.110668	-0.276769
GSM1854934	0.127749	-0.14441	0.183636	-0.0452499	0.117376	-0.0127203	0.129838	0.23494	-0.0299957	-0.0375576	-0.0439256	-0.127654	-0.0712524	0.0849432	0.0143124	0.187748	0.0293294	0.0604907	-0.0355859	-0.0749388	0.0128566	0.0283813	-0.0736685	-0.310067
GSM1854935	0.00147315	-0.201974	0.171158	-0.123456	-0.168886	-0.0215341	0.0106058	0.0919711	-0.104637	-0.012503	0.0454255	-0.0212716	-0.0203226	-0.0416464	-0.0756697	0.146584	-0.00557885	0.0724	-0.0806923	-0.000822771	-0.00343129	-0.0991698	-0.0671684	-0.30298
GSM1854936	-0.0164145	-0.278006	0.15607	-0.0935336	-0.0938289	-0.0263157	-0.0143555	0.0606952	-0.0683127	-0.107811	-0.0771933	-0.0913325	-0.0189173	-0.00427143	-0.135266	0.233417	0.00562044	0.0755287	-0.0562221	0.0180678	-0.0398565	0.0954278	-0.0345651	-0.405398
GSM1854937	0.160733	-0.179042	0.174977	0.0107921	0.143246	0.00859069	0.187735	0.331899	-0.057875	0.0422603	-0.0394941	-0.0594953	-0.0589236	0.197359	-0.069779	0.164619	-0.0021383	0.0414833	-0.025337	-0.0529927	0.0617708	0.00286742	-0.051851	-0.307349
GSM1854938	0.0779234	-0.211245	0.107904	-0.0493313	-0.195011	-0.0562632	-0.0436421	0.109753	-0.251866	0.0714116	-0.0716821	-0.00796013	-0.0608894	0.0836812	-0.126988	0.198487	0.0174334	0.064042	-0.0907948	0.162346	-0.0192363	-0.216035	0.0613469	-0.217455
GSM1854940	0.23223	-0.234492	0.206977	0.032698	-0.05714	0.00397821	0.0874748	0.187777	-0.105046	-0.0511203	0.0286149	-0.00617297	-0.0545867	0.166586	0.0114669	0.195648	-0.00292441	0.0880178	-0.0204032	0.0116935	0.0551727	0.0541986	-0.0339688	-0.268421
GSM1854941	0.262523	-0.152223	0.118366	-0.106958	-0.0263863	-0.0225665	0.0483916	0.113158	-0.0997565	-0.12131	-0.0622599	-0.145717	-0.0948642	0.0138821	-0.0226212	0.206834	0.00128479	0.0218365	-0.0020434	-0.0565901	0.00191264	-0.163479	0.0215057	-0.309485
GSM1854942	0.0832279	-0.154123	0.10759	-0.0711215	-0.133237	-0.0315924	0.0723002	0.171556	-0.117263	-0.0963889	-0.173987	-0.0435192	-0.029402	0.0304825	-0.0932078	0.174121	-0.0328451	0.0332	-0.0791034	-0.0144281	-0.000653463	-0.215485	0.0316242	-0.266576
GSM1854944	0.186897	-0.145605	0.14868	0.0468811	-0.00338794	-0.0409908	0.103647	0.189876	-0.100796	-0.0261927	-0.0679149	0.023697	-0.0485849	0.0963984	0.0777906	0.179377	-0.0220365	0.0821817	0.0112459	0.0370607	0.0752261	-0.0098287	-0.0283923	-0.195321
GSM1854945	0.18796	-0.206201	0.136415	-0.0112438	0.000559101	-0.0496783	0.122768	0.164583	-0.0778569	-0.0950301	-0.158771	0.0256104	-0.0651916	0.101835	0.0656551	0.203886	-0.0299148	0.0786412	-0.0312845	0.0426124	0.060356	-0.111265	-0.014282	-0.250267
GSM1854947	0.035491	-0.232975	0.107954	-0.120566	-0.00436402	-0.038883	0.103533	0.191209	-0.12931	-0.0480778	-0.0424893	-0.0863499	-0.064468	0.111737	-0.124407	0.175093	-0.0652226	-0.00600853	-0.0851885	-0.190211	-0.0233721	-0.129684	0.000156848	-0.270653
GSM1854948	0.137381	-0.186939	0.199849	0.077964	-0.0937833	0.0128852	0.0261731	0.06655	-0.0561704	-0.0127912	-0.045056	-0.0549479	-0.0518658	0.047277	-0.0179795	0.235048	0.0403149	0.0784982	-0.0246994	0.0151647	-0.0673955	0.00538305	-0.070393	-0.356761
GSM1854950	0.116551	-0.034091	0.174757	0.00117679	-0.108215	-0.00344111	0.0835582	0.154652	-0.0195524	-0.0375092	0.0401743	-0.0526684	-0.0207871	0.0644598	0.0772575	0.213975	0.0676157	0.0907163	0.00595708	0.017901	0.0304917	-0.117784	-0.0374499	-0.409281
GSM1854951	0.15224	-0.0992976	0.187308	0.0486452	0.0579396	-0.0208087	0.139052	0.236144	-0.0416676	-0.0852807	-0.0277158	-0.0347604	-0.00987935	0.0139792	0.108861	0.178164	0.0192457	0.0458549	0.0179325	0.03618	0.0607262	-0.0538559	-0.0602323	-0.26745
GSM1854952	0.0626177	-0.117303	0.158697	-0.0296091	0.0424636	0.00711806	0.12879	0.216496	-0.0160211	-0.064751	-0.0509956	-0.0756638	-0.0229225	0.334822	0.0264263	0.165502	-0.0140826	0.0338308	0.0294146	-0.0241906	0.0300327	0.0459945	-0.0614927	-0.295505
GSM1854953	0.0550925	-0.0774428	0.159349	0.066988	-0.0857354	-0.0490007	0.0112781	0.048227	-0.129869	-0.112816	-0.0705151	-0.111947	-0.0850672	0.018639	0.149113	0.252296	0.0754102	0.130024	-0.0351393	0.0434234	0.0194175	0.0431063	-0.0906691	-0.391127
GSM1854954	0.127678	-0.242752	0.119924	-0.0496713	-0.0316332	-0.0639999	0.0881276	0.26522	-0.139137	0.00184305	-0.0289292	-0.0127022	-0.0195955	0.130182	0.0137727	0.15769	-0.0518298	0.0446356	-0.0404389	-0.0277847	0.0444506	-0.115661	-0.020346	-0.279779
GSM1854955	-0.0789105	-0.241857	0.160182	-0.160436	-0.0710114	-0.00210008	0.0170974	0.0528359	-0.0839695	-0.150215	-0.0675228	-0.0714112	-0.0653844	-0.0251432	-0.0926829	0.197433	0.0337974	0.055851	-0.0419502	0.00628828	-0.0125934	0.0576056	-0.139722	-0.345209
GSM1854956	0.140759	-0.166117	0.154019	0.123504	-0.107035	-0.0552048	-0.028984	0.0982694	-0.221413	-0.141543	-0.0626953	-0.0639105	-0.0280229	0.0358218	0.126962	0.257938	0.0402135	0.0605881	-0.00650685	-0.0272524	0.0293682	-0.192236	0.0936844	-0.278517
GSM1854957	0.0831639	-0.220812	0.182985	-0.0787493	0.0321606	0.00698915	0.102065	0.178426	-0.121979	-0.0732958	-0.127438	-0.104414	-0.0313653	-0.106397	-0.128968	0.17174	0.00953493	0.0296199	0.0034281	-0.0447091	-0.0555602	-0.0425264	-0.0359317	-0.256965
GSM1854958	0.117043	-0.139097	0.171102	-0.0502786	0.0427599	0.00540595	0.130331	0.247768	-0.0055093	-0.0844233	-0.0344455	-0.139118	-0.078001	0.0969809	0.0166501	0.185615	0.032456	0.0561509	0.00873474	-0.0681402	0.0208075	-0.119355	-0.0706372	-0.292399
GSM1854960	0.0830644	-0.280947	0.16372	-0.10411	-0.0520169	0.0294315	0.0702698	0.152317	-0.0829844	-0.0609539	-0.0527646	-0.0892084	-0.0300062	0.286962	-0.127687	0.146794	-0.0107601	0.0748551	-0.0370195	-0.0335961	0.00438302	-0.028936	-0.0608263	-0.289778
GSM1854961	0.168068	-0.198105	0.108904	-0.0448491	-0.0417972	-0.0297785	0.0166923	0.214329	-0.134334	-0.103749	-0.136716	-0.0423449	-0.0515777	-0.0556257	-0.106012	0.17943	-0.0436594	-0.00651351	-0.0782336	-0.0165706	0.00331599	-0.181337	0.0627621	-0.338511
GSM1854962	0.0511392	-0.156642	0.212487	0.0648004	0.0265663	0.0247627	0.0916917	0.155737	0.0410104	-0.0193187	-0.06544	0.0121759	-0.033999	0.103097	0.0204394	0.154955	0.0200451	0.0329719	0.0262633	-0.0250479	0.0591857	-0.0606034	-0.078304	-0.2857
GSM1854963	0.0241681	-0.173718	0.139486	-0.0764559	-0.137016	-0.0361965	0.0612795	0.147276	-0.0781692	-0.0218978	-0.0166334	-0.0353204	0.0201908	-0.097175	-0.122663	0.166834	-0.034041	0.0595738	-0.0902565	0.00600786	0.0486865	-0.0887315	-0.0509328	-0.248325
GSM1854964	-0.0837055	-0.274761	0.123416	-0.160108	-0.143712	0.0365342	0.0356781	0.141316	-0.0466677	-0.132846	-0.0206869	-0.063368	-0.00190457	-0.0369867	-0.171002	0.179806	-0.0441988	0.00779433	-0.0860077	-0.0506937	-0.0113942	-0.148322	-0.0299922	-0.331812
GSM1854965	0.189684	-0.19742	0.131349	0.0306791	-0.00903075	-0.0141875	0.0456556	0.247069	-0.0983941	0.0140165	-0.0806033	0.00868159	-0.0859566	0.113775	-0.0519444	0.157542	-0.046947	0.0572441	-0.0578236	-0.0161336	0.0726086	-0.224766	0.0190183	-0.285895
GSM1854966	0.145295	-0.218132	0.217725	0.0543035	0.0454962	0.00501499	0.151579	0.22235	0.0644018	-0.00202043	-0.0357201	-0.0616774	-0.0140928	0.0665955	0.0575365	0.186411	0.0176264	0.0726948	0.00335471	0.0383626	0.0576811	-0.0608003	-0.0605206	-0.276284
GSM1854967	0.13663	-0.246712	0.170718	-0.112115	-0.0682305	0.00117818	0.0977158	0.190034	-0.0755035	-0.0205885	-0.000578381	-0.0954597	-0.0386548	0.0516455	-0.0937777	0.164572	-0.00791196	0.0665359	-0.0277789	0.0216405	0.0166019	-0.10557	-0.0314207	-0.36181
GSM1854969	0.0348863	-0.225402	0.125015	-0.0770476	-0.188083	-0.060304	0.0109127	0.0113347	-0.0653422	-0.121756	-0.0230628	-0.0360818	-0.04266	-0.0812542	-0.161485	0.205298	0.0196435	0.019858	0.00307256	-0.0486396	-0.0387089	-0.057511	-0.037278	-0.283371
GSM1854970	0.232743	0.116176	0.196964	0.0784668	-0.143392	-0.0304229	0.00228078	0.0310063	-0.194624	-0.17496	0.0449698	-0.064286	-0.0506897	-0.0493156	0.196447	0.262969	0.118737	0.111461	0.0411575	-0.00927503	0.0371885	-0.0927568	-0.0235907	-0.256577
GSM1854971	0.216821	0.00935824	0.177624	0.0479569	-0.0915746	-0.0399367	0.00609229	0.112913	-0.117509	-0.0322271	-0.00978474	0.0369107	-0.0476676	0.0478594	0.0710098	0.226493	0.0522747	0.0785267	-0.000243082	0.0114345	0.0195111	-0.132794	-0.00304063	-0.269197
GSM1854972	0.0127068	-0.232146	0.173405	-0.054682	-0.0116435	-0.00737923	0.157279	0.174876	0.0490996	-0.0132448	-0.0641255	-0.0885958	-0.0395949	-0.0234929	-0.0138418	0.174117	0.0176192	0.094047	0.00223191	-0.0101877	-0.00583115	0.0449821	-0.0587652	-0.407242
GSM1854973	0.0741829	-0.211143	0.113735	-0.110804	-0.0924041	-0.00762486	0.0675378	0.171855	-0.0508863	-0.0508705	-0.0257257	-0.0180789	-0.00669352	0.000873702	-0.102784	0.17287	-0.0217009	0.0215686	0.00190716	-0.0659674	0.0366999	-0.113469	-0.0547491	-0.372197
GSM1854974	0.172203	-0.213375	0.163687	0.124767	0.105491	-0.0428384	0.195561	0.294598	-0.072642	-0.0424297	-0.0697805	0.0413555	-0.0710505	0.137074	0.159771	0.182198	0.0285354	0.0578295	-0.0318852	-0.0378443	0.0341853	-0.0556368	-0.0720662	-0.208815
GSM1854975	0.163379	-0.204111	0.129876	0.0134572	-0.170935	-0.0531285	0.00917842	0.0791947	-0.179672	0.106703	-0.0690231	-0.0423018	-0.0935336	0.232987	-0.0537658	0.160777	-0.00713559	0.045358	-0.0771718	0.01383	0.0150666	-0.0623448	0.0545741	-0.247452
GSM1854977	0.185071	0.0182604	0.179812	0.132358	-0.110714	-0.0132741	0.0383751	0.209676	-0.15322	-0.139533	-0.0531474	-0.00270167	-0.0496291	-0.0405786	0.198955	0.241896	0.066759	0.0935442	-0.0193406	-0.00914984	0.0509126	-0.0780995	-0.0311881	-0.30599
GSM1854979	0.145893	-0.162362	0.132603	-0.0246797	0.0208514	0.0113919	0.139732	0.257648	-0.0173192	0.00240647	-0.0470596	-0.109451	-0.0659415	0.265217	0.000997853	0.19524	0.002342	0.0412158	-0.0352758	-0.0242916	-0.00862164	-0.0430556	-0.0885883	-0.387924
GSM1854980	0.155934	-0.155536	0.198507	0.0446186	0.0596971	-0.00311097	0.0666414	0.151596	0.0191466	-0.0315505	-0.00138048	-0.0762781	0.00932787	0.142219	0.191931	0.227768	0.0775343	0.0982258	0.00698626	0.112367	-0.00184569	-0.18462	-0.0125773	-0.286089
GSM1854981	0.162075	-0.181578	0.0872864	-0.0718904	-0.192209	-0.0303795	0.0103904	0.0549957	-0.123806	-0.173506	-0.0566248	-0.0556386	-0.0266696	-0.075915	-0.0161653	0.192902	0.0125179	-0.0218378	-0.0802794	0.00948297	-0.0555934	-0.171267	0.0155709	-0.217455
GSM1854983	-0.0626845	-0.200734	0.140336	-0.109466	-0.191171	-0.0175728	0.0667984	0.119852	-0.0906861	-0.0814652	-0.0295736	-0.0146541	-0.0774522	-0.049801	-0.154956	0.144735	-0.00804986	0.0282038	-0.0771412	-0.0341548	0.00304348	0.0213408	-0.0612534	-0.327541
GSM1854984	-0.004426	-0.104988	0.179025	0.0160668	-0.0358673	-0.0402315	0.0533928	0.163811	-0.0514572	-0.0412262	-0.0772001	-0.0283363	0.00076504	0.1927	-0.00702122	0.192328	-0.00555069	0.105437	-0.0651034	0.0825524	0.00832018	-0.191957	-0.0312907	-0.290263
GSM1854985	0.222638	-0.142349	0.170848	0.0499471	0.086294	-0.0142508	0.116951	0.229234	0.0539968	-0.0101372	-0.0942985	-0.0482444	-0.0535057	0.0775653	0.169587	0.231594	0.0477781	0.042327	0.0139326	0.0686992	0.0829422	-0.150532	-0.0494102	-0.229104
GSM1854986	0.182989	-0.165523	0.16232	0.0285745	-0.0583539	-0.033187	0.0998051	0.194257	-0.0971961	-0.0436315	-0.100095	0.0335886	-0.0190165	0.0803805	0.00513968	0.161009	-0.0127979	0.0104748	-0.0327596	-0.0452132	0.102608	-0.0895911	-0.0139525	-0.27541
GSM1854987	0.0712866	-0.171339	0.14084	-0.112339	0.1067	0.0171134	0.119555	0.135891	0.0271639	-0.0507448	-0.0972698	-0.0425041	-0.052026	0.129405	-0.0183168	0.204223	0.0218885	0.0572372	0.0626212	-0.0381255	0.0519369	-0.065656	-0.0384641	-0.313368
GSM1854988	0.144141	-0.187023	0.164983	0.00858891	-0.0501546	-0.00827654	0.125051	0.254642	-0.0791988	-0.0379436	0.0309128	-0.040655	-0.0720498	0.0708669	0.00385453	0.159447	-0.0323703	0.0331129	-0.045133	-0.0157855	-0.0407948	-0.0463353	-0.0709727	-0.379284
GSM1854989	0.12099	-0.259747	0.138246	-0.117002	-0.0282769	0.00828232	0.143051	0.243223	-0.0478789	-0.0106513	-0.076525	-0.112349	-0.0606567	0.140957	-0.0801338	0.185043	-0.0101429	0.0251192	-0.0511191	-0.0520354	0.0326378	0.134857	-0.0440304	-0.329288
GSM1854990	0.134196	-0.178169	0.145587	-0.0537251	0.126801	0.00140188	0.158702	0.230002	0.0301894	-0.0529768	-0.0363402	-0.0347027	-0.0569267	0.0694107	0.00857853	0.157622	-0.00512119	0.0363507	-0.0145148	-0.0301102	0.0246728	-0.0343222	-0.0939274	-0.371517
GSM1854992	0.105999	-0.230176	0.125307	-0.12168	-0.0162479	-0.0592119	0.0665907	0.166784	-0.0456724	-0.0382001	-0.0417992	-0.0225727	-0.0099686	0.113775	-0.113048	0.175068	-0.055263	-5.34e-05	-0.0699943	0.111403	0.0046455	-0.232824	0.00876178	-0.27541
GSM1854994	0.194019	-0.061375	0.156184	0.0385895	0.0934305	-0.0683671	0.147654	0.216716	-0.0181982	-0.0647413	-0.0794878	-0.0410843	-0.0780478	0.194933	0.138079	0.212693	0.0238675	0.047926	0.0376682	0.002434	0.0445802	-0.0720563	-0.0891027	-0.144161
GSM1854995	0.167377	-0.18682	0.175216	0.0693806	-0.0335115	-0.0674533	-0.00337617	0.0756231	-0.14151	-0.0706906	-0.0433801	0.0609728	-0.078888	-0.0354335	0.0117885	0.219592	-0.0223386	0.0316518	-0.0468026	0.0192478	-0.0272083	0.0441935	0.0192613	-0.212601
GSM1854996	0.122039	-0.159417	0.126689	-0.0668056	-0.0555302	-0.0484334	0.0897589	0.0996463	-0.122262	-0.141915	-0.052709	-0.0775651	-0.0758062	-0.007475	-0.00563741	0.181931	0.0124788	-0.00139642	0.00735917	-0.0401343	0.0166857	-0.0725803	-0.0759649	-0.252791
GSM1854997	0.119465	-0.237194	0.17643	-0.0250217	0.000176524	-0.018616	0.0660817	0.196086	-0.032949	-0.0855575	-0.0532534	-0.0503801	-0.0504952	0.00203864	-0.0711233	0.190984	0.0103536	0.0335808	-0.0756536	-0.0326729	0.0206311	0.0455782	-0.0888888	-0.343073
GSM1854998	0.159313	-0.13462	0.140289	0.0141343	-0.0540307	0.00935942	0.0301722	0.163253	-0.098477	-0.050369	-0.026551	-0.0250977	-0.0768405	0.0245607	-0.0211774	0.207943	-0.00727302	0.0340965	-0.0745891	0.0168941	0.0664748	-0.076745	-0.0554092	-0.248325
GSM1854999	0.178363	-0.233749	0.168203	0.0279319	0.0636012	0.0147459	0.177251	0.221229	-0.0721926	-0.0640345	-0.0905615	-0.0770682	-0.0864102	0.0802835	0.0433883	0.197638	0.0220317	0.0494703	-0.0205715	-0.0401666	0.0351752	0.0222112	-0.0759052	-0.281914
GSM1855000	0.156043	-0.235894	0.132811	-0.00520285	-0.0423549	-0.0731791	0.0440303	0.0931498	-0.212021	-0.122268	-0.0624846	-0.00904806	-0.0583082	0.0544607	-0.0318765	0.230648	-0.0282916	0.011974	-0.0671501	-0.0202818	0.033765	-0.195859	0.00912197	-0.222406
GSM1855001	0.126626	-0.200313	0.142185	-0.0963829	-0.0496484	-0.0102734	0.056381	0.155345	-0.0484313	0.00540172	-0.0388276	-0.0626083	-0.0859029	0.124745	-0.0659581	0.170506	-0.0309453	0.0363311	-0.0524178	0.00927602	0.0146575	-0.0186044	0.0111094	-0.384526
GSM1855003	0.154929	-0.0906874	0.176654	0.106339	0.0867183	-0.0201816	0.120555	0.158932	0.0419447	-0.00505482	-0.0639916	-0.0183624	-0.0136885	0.150374	0.124713	0.199981	0.0334945	0.0922197	0.0167759	0.0672216	0.063324	-0.174849	-0.0939585	-0.230657
GSM1855004	-0.0213362	-0.0567021	0.187471	0.0984357	-0.0602094	-0.0399177	0.0899789	0.170067	-0.0721273	-0.030483	0.000931762	0.0356599	-0.0158122	0.19503	0.0918728	0.171798	-0.00629338	0.0723945	-0.0175875	-0.0515948	0.0174704	-0.139186	-0.0442474	-0.248422
GSM1855005	0.17992	-0.12875	0.186882	0.226164	0.132161	-0.0283709	0.136923	0.288319	-0.0700496	-0.0294847	-0.0346731	0.0876474	-0.00366637	0.332977	0.155166	0.169789	-0.0169779	0.0767071	-0.0147175	-0.0409845	0.0957753	-0.0456735	-0.0305708	-0.0996991
GSM1855006	0.215004	-0.211617	0.147344	-0.0315647	0.103153	-0.0567611	0.0912266	0.223936	-0.111738	-0.0725048	0.0175674	-0.0112274	-0.0287103	0.182215	-0.0366475	0.16257	-0.0346977	0.0544423	-0.0389306	-0.057948	0.0153628	-0.0666854	-0.0234652	-0.229298
GSM1855007	0.232576	-0.167	0.118484	0.0714258	-0.106652	-0.0187903	0.129017	0.12005	-0.138972	-0.0889451	0.0622085	0.00496683	-0.0861637	-0.07475	0.029636	0.20713	0.0479857	0.0273213	-0.0026633	-0.13509	0.0127533	-0.114729	-0.0363655	-0.212989
GSM1855008	0.0774584	-0.271994	0.124654	-0.0206823	-0.123798	0.016993	0.114689	0.200993	-0.127102	-0.0602893	0.0700951	0.00624904	-0.033784	0.187749	-0.0787475	0.135185	-0.064354	0.0490227	-0.0452205	-0.0601332	-0.0402877	-0.0183281	-0.0585164	-0.3156
GSM1855009	0.0556569	-0.231368	0.115649	-0.0151708	-0.116386	-0.0491751	-0.0293675	0.101998	-0.139975	-0.100044	-0.0488987	0.014933	-0.0493761	0.0375692	-0.0293478	0.179063	-0.0603808	0.0600097	0.004587	-0.0230904	-0.0185727	-0.14763	0.0779462	-0.306766
GSM1855010	0.0547489	-0.116255	0.173446	0.091234	0.150597	0.023255	0.137082	0.268449	-0.0709812	0.12021	-0.0313902	0.0837317	-0.0119961	0.218425	0.0230945	0.136904	-0.0163181	0.13121	-0.0721928	-0.0185194	0.0271172	-0.0379859	-0.061226	-0.15183
GSM1855011	0.18948	-0.173064	0.167089	0.0550171	0.169949	-0.0159031	0.120917	0.234546	-0.118867	-0.0784003	-0.0899027	0.0235657	-0.087176	0.214834	0.0754045	0.158484	-0.0375927	0.043094	-0.00547367	-0.0823076	0.0515665	-0.0943527	0.00612541	-0.0848461
GSM1855012	0.160546	-0.218892	0.110216	-0.0430492	-0.0502209	-0.0273206	0.0318877	0.177381	-0.182185	-0.0799466	-0.0423804	-0.0510298	-0.0138245	0.00854286	-0.106657	0.153821	-0.053731	0.0393014	-0.0285009	-0.0120902	0.031506	-0.190108	-0.00872524	-0.249782
GSM1855014	0.220213	-0.0466241	0.166903	0.0996559	-0.0466712	-0.0534201	0.0829045	0.222197	-0.0444712	-0.135163	-0.056593	0.0210561	-0.0404537	0.0497039	0.109751	0.207473	0.00110432	0.070289	-0.0162246	0.000484177	0.0291866	-0.0941379	-0.0309028	-0.261722
GSM1855015	0.13987	-0.241321	0.156586	0.012692	-0.069902	-0.0153424	-0.0126309	0.104675	-0.057685	-0.0702965	0.152892	-0.0655858	-0.0015486	-0.0133968	-0.0240672	0.193809	0.0194669	0.0431457	-0.051565	-0.0117191	-0.0329956	-0.073906	-0.0502516	-0.475876
GSM1855016	0.0516636	-0.159294	0.18647	0.0988371	-0.16991	-0.0368176	0.0560481	0.179585	-0.176598	-0.0802275	0.0258542	0.0451934	-0.0551219	-0.0541695	0.0254887	0.173619	-0.0250964	0.0493955	-0.0344605	-0.0194588	0.0115136	-0.0830341	-0.0128256	-0.305796
GSM1855018	0.120922	-0.196057	0.12157	-0.00912613	0.01487	-0.0435514	0.111234	0.168137	-0.0370215	-0.0734472	-0.00395001	0.0195159	-0.00798427	0.0997961	-0.0148298	0.167593	-0.0549865	0.0381265	-0.0334289	-0.0656064	0.0135337	-0.0953518	-0.062276	-0.222017
GSM1855019	0.112407	-0.12794	0.185449	0.0590434	-0.0988057	-0.0388178	0.0609007	0.159899	-0.0870647	-0.0556667	-0.0366745	-0.0155062	-0.0338592	0.109601	0.00158203	0.161615	-0.0167848	0.0623148	-0.00247445	0.0103765	0.00123741	-0.129587	-0.0167662	-0.319484
GSM1855020	0.23057	-0.167896	0.107969	-0.125729	-0.146611	-0.0817287	-0.00175088	0.0781564	-0.173558	-0.162359	-0.125017	-0.0817933	-0.0346462	0.0366955	-0.146112	0.202	-0.0313109	0.0461151	-0.0657744	-0.016431	-0.0465181	-0.0101894	0.0300224	-0.330259
GSM1855021	0.181269	-0.107345	0.159703	0.102594	0.227098	-0.0237635	0.172325	0.183733	-0.125415	-0.0680818	-0.0478189	0.0211547	-0.0674838	0.17542	0.163944	0.213145	0.0112105	0.0975711	0.00962176	-0.00869398	0.0343538	-0.0483658	-0.0274083	-0.0583439
GSM1855022	0.229788	-0.129934	0.174808	0.149516	-0.116528	-0.0539604	0.0502526	0.136562	-0.101128	-0.00409769	0.0142288	0.0616987	-0.0905388	0.107757	0.0656993	0.172478	-0.00142341	0.0442988	-0.0476407	-0.00701745	0.0240952	-0.127977	-0.00760923	-0.274634
GSM1855023	0.12107	-0.142038	0.0959237	-0.154444	-0.17829	-0.0277233	-0.0533319	0.103825	-0.128451	-0.1437	-0.0385584	-0.0321737	-0.0425958	0.0375692	-0.152687	0.173589	-0.0677564	0.0232098	-0.0562717	-0.106056	-0.0468993	-0.0800466	0.0329403	-0.314047
GSM1855024	0.205769	-0.101223	0.174794	0.109068	-0.0289267	-0.0628757	0.119172	0.184782	-0.0951056	0.0250318	-0.0200969	0.0473146	-0.0571051	0.105815	0.0950434	0.201708	0.0168672	0.0582523	-0.0116593	0.00972374	0.0122397	-0.0495774	-0.0509489	-0.224056
GSM1855026	0.254853	-6.04e-05	0.165858	0.253176	-0.0731007	-0.0596894	0.0592264	0.149097	-0.138678	-0.00480603	-0.0810444	0.0279198	-0.0866717	0.185904	0.182014	0.217087	-0.0182774	0.0576257	-0.00395089	0.131918	0.0367455	-0.0622636	-0.014636	-0.286962
GSM1855027	0.224076	-0.142377	0.165692	0.00782981	-0.145646	-0.0493804	0.0195993	0.116603	-0.116252	-0.0137591	-0.0400071	0.0176199	-0.0364794	0.205029	0.00895985	0.171605	-0.00842574	0.0195455	-0.0477791	-0.0430176	0.0100593	-0.0627802	-0.00332271	-0.311911
GSM1855028	0.178008	-0.194772	0.128799	-0.00588028	-0.196056	-0.0439895	-0.0155158	0.0710032	-0.104238	-0.116331	-0.00883	0.00752356	-0.0816672	0.0251432	-0.0226774	0.184691	-0.0150889	0.0673407	-0.0108479	0.00202146	0.00670927	-0.0150889	0.0739466	-0.355499
GSM1855029	0.163247	-0.196963	0.111407	-0.0263532	-0.0878111	-0.0940378	0.0206695	0.105631	-0.137793	-0.105164	-0.00537464	0.00988194	-0.026545	0.113484	-0.0119578	0.241831	-0.0656454	0.0353419	-0.0768371	-0.0691438	-0.0370838	-0.14976	0.0163227	-0.250655
GSM1855031	0.144337	-0.149013	0.150953	0.121697	0.0271501	-0.0408699	0.106299	0.258336	-0.0822304	-0.0481979	0.014362	-0.053759	-0.0446268	0.134938	0.139485	0.194984	-0.0103142	0.0802279	-0.0214832	0.00588664	0.0300809	0.00537113	-0.0597479	-0.351131
GSM1855032	0.224355	-0.17624	0.141697	-0.0614452	0.0032854	-0.0474542	0.0764662	0.229193	-0.0929337	-0.126108	0.00706637	-0.0218229	-0.0124682	-0.00893117	0.0504684	0.180329	-0.0524425	0.00868386	-0.0137712	-0.0262694	0.0403013	-0.0314961	-0.0708188	-0.233181
GSM1855033	0.197561	-0.221776	0.096112	-0.127199	-0.172292	-0.0995922	0.010314	0.0972492	-0.174682	-0.130106	-0.148391	-0.0742599	-0.0564855	-0.0225221	-0.15271	0.175014	-0.0524031	0.0197592	-0.0347879	0.0172725	-0.0488313	-0.203729	-0.0080758	-0.401611
GSM1855034	0.144929	-0.223015	0.0871355	-0.103451	-0.204477	-0.0316725	0.0730576	0.163449	0.0206018	-0.0615232	-0.0334342	-0.121376	0.0222127	0.137462	-0.123829	0.169222	-0.0464167	0.0239705	-0.0415393	-0.0197062	-0.0618482	-0.0557945	-0.0980178	-0.400058
GSM1855035	0.302531	-0.098294	0.17876	0.132405	-0.052385	-0.0250532	0.0821016	0.180745	-0.0632759	-0.0674918	0.00994656	-0.00639304	-0.0189918	0.141734	0.157018	0.179964	-0.00830392	0.0514325	-0.00113319	-0.0279289	0.0372499	-0.116957	-0.06669	-0.266285
GSM1855036	0.236732	-0.244012	0.162527	0.13344	-0.0387374	-0.0390342	0.160702	0.256567	-0.0969073	0.0193487	0.0368911	-0.0306812	-0.0350175	0.154451	0.00883612	0.1857	0.0172522	0.0896153	-0.0274294	0.0124017	0.0222087	-0.0646779	-0.0878195	-0.330939
GSM1855037	0.180993	-0.21776	0.116372	-0.106507	-0.166923	-0.0261093	-0.0555464	-0.00734974	-0.120788	-0.0922771	0.0221066	-0.0486122	-0.0487317	0.0300942	-0.0739246	0.197893	0.0237093	0.0188952	0.0161158	-0.0305222	-0.0889621	-0.198719	0.0449441	-0.303757
GSM1855038	0.0213431	-0.160507	0.115092	-0.0863852	-0.152147	-0.0453717	-0.0531152	0.136713	-0.105519	-0.103525	-0.0136645	0.0993533	-0.0368342	0.0144646	-0.121968	0.166127	-0.0713154	0.00795992	-0.0465594	-0.0371118	-0.0502505	-0.107635	0.0152402	-0.300845
GSM1855039	0.196696	-0.236733	0.161416	0.0590091	0.0172121	-0.0502414	0.0486904	0.235193	-0.149132	0.0131029	-0.113341	0.0352827	0.0029575	0.0721289	0.00675857	0.191942	-0.039904	0.0538205	-0.0507028	-0.00876775	0.0946665	-0.174894	0.0083254	-0.212018
GSM1855040	0.280267	-0.173902	0.112628	0.100191	-0.170601	-0.0460871	0.0717678	0.130619	-0.121454	-0.0456898	0.00700596	0.0446278	-0.0393349	0.0745559	0.0632357	0.190424	-0.0463795	0.0483827	-0.0117494	-0.0422687	0.0464087	-0.0478327	0.0284256	-0.319386
GSM1855041	0.233673	-0.123193	0.159804	0.0139865	-0.0250051	-0.0476001	0.0439211	0.184779	-0.0892897	-0.000366085	-0.038477	-0.057415	-0.0589291	0.107951	0.0631399	0.198214	0.0072914	0.0438158	0.00995109	-0.0151854	0.0140996	-0.147074	-0.00949063	-0.133579
GSM1855042	0.217618	-0.132777	0.135154	-0.00563417	0.00552259	-0.00946531	0.0844023	0.229422	-0.0720171	-0.109646	-0.0602248	-0.0115927	-0.0459303	-9.71e-05	0.0635812	0.244371	0.0350737	0.0721487	-0.00695767	0.0159897	0.0698107	-0.0945879	0.00648242	-0.240171
GSM1855043	0.228862	-0.129615	0.161753	-0.00808104	-0.159996	-0.00758281	0.0380393	0.161622	-0.0437835	-0.037455	-0.00799157	-0.0399529	-0.058729	0.0298029	-0.0355638	0.195909	-0.0144027	0.0508212	0.00133107	-0.0103064	-0.026044	-0.191833	0.0410663	-0.332007
GSM1855044	0.17477	-0.228449	0.190566	-0.0315889	0.0312935	-0.0179873	0.0921959	0.167562	-0.0243268	-0.0944915	-0.125706	-0.0797627	-0.0561296	-0.075915	-0.0414398	0.146462	0.00259823	-0.00178214	0.00400376	-0.103674	-0.0287871	0.00870786	-0.0918831	-0.263081
GSM1855045	0.131172	-0.259806	0.168762	0.0493417	-0.012488	-0.0332708	0.0796912	0.192948	-0.147884	-0.0754187	-0.00337632	-0.125924	-0.0232903	0.138433	-0.059676	0.207111	0.00128248	0.0569177	-0.0552845	-0.0131143	-0.000798422	-0.0249348	-0.0531125	-0.371614
GSM1855046	0.099453	-0.22075	0.183658	-0.13428	-0.0724151	-0.0183281	0.0747859	0.117256	-0.0992218	-0.0961065	0.0472873	-0.116252	-0.049528	0.0882439	-0.0728198	0.167268	0.000351589	0.0190036	0.0205118	-0.0913302	0.0340594	-0.137861	-0.049003	-0.337928
GSM1855047	0.134916	-0.16592	0.122835	0.0493084	-0.0293181	-0.0214447	0.044345	0.227438	-0.129459	0.00979252	-0.0631069	-0.0638739	-0.0536266	-0.00669838	-0.0243211	0.180111	-0.010937	0.029892	-0.0580711	0.0199224	0.00858855	-0.0843389	0.0753164	-0.254927
GSM1855048	-0.0221245	-0.283175	0.157091	-0.115861	-0.214615	-0.00344834	-0.0274507	-0.0905646	-0.133581	-0.141856	0.133175	-0.0745425	-0.0136629	-0.0471799	-0.193267	0.150191	0.0333931	0.0818027	-0.00456411	-0.0745953	-0.0590045	-0.0310676	-0.0916447	-0.281817
GSM1855049	0.233721	-0.140477	0.177446	0.109153	0.013316	-0.017631	0.0596583	0.182851	-0.158033	-0.0595484	-0.0318844	0.0134485	-0.0825322	0.0901854	0.131063	0.228403	0.0305372	0.0365155	-0.0245743	0.00339616	0.0544851	-0.031077	0.0190722	-0.291428
GSM1855050	0.140235	-0.130366	0.1366	-0.0428697	0.0891538	-0.0145569	0.106313	0.194591	-0.0927286	-0.0981128	-0.0567153	-0.0684965	-0.0670613	0.129017	0.0358186	0.195302	-0.0271428	0.0499863	0.0357953	0.0159693	0.0300818	-0.084211	-0.0100326	-0.216678
GSM1855051	0.145087	-0.242432	0.157368	-0.0852956	-0.121725	-0.00741071	0.0937876	0.172899	-0.0334144	-0.0655037	-0.0148777	-0.0977113	-0.042026	0.106689	-0.0382403	0.179626	-0.00130349	0.0369152	-0.0268507	0.011536	0.0451467	-0.111084	-0.070507	-0.341229
GSM1855052	0.216621	-0.132553	0.171989	0.0998821	0.0590055	-0.0257879	0.135413	0.285993	-0.101034	-0.037162	-0.0557721	0.0210591	-0.00965988	0.21396	0.0947188	0.176966	-0.014033	0.0611447	-0.00796838	-0.0262227	0.0717244	-0.10023	-0.0363223	-0.16843
GSM1855053	0.0379514	-0.227366	0.179229	-0.0796063	0.0983242	0.0163097	0.0610859	0.205064	0.0857527	-0.132447	-0.0261765	-0.17692	-0.0449626	0.104262	0.0358336	0.194786	-0.00298946	0.0381549	-0.000129867	0.0283003	0.044912	-0.00985101	-0.0878782	-0.315309
GSM1855054	0.0537557	-0.209958	0.150038	-0.0543669	0.104737	0.000266444	0.0851229	0.146322	0.0518557	-0.112226	-0.0904937	-0.0812215	-0.0496304	0.207164	-0.0210573	0.183628	-0.00637769	0.0469053	0.00717402	-0.0538006	0.0732572	-0.0347057	-0.0371802	-0.260751
GSM1855055	0.234354	-0.0470192	0.19678	0.197387	0.0230183	-0.0309478	0.111935	0.197806	-0.0312781	-0.00653212	-0.0401345	-0.035123	-0.065146	0.135812	0.195534	0.219647	0.0214722	0.0803819	0.0320637	0.0593188	0.0323091	-0.069909	-0.0188221	-0.308805
GSM1855056	-0.0472742	-0.194202	0.170137	-0.131951	-0.130513	-0.0115376	0.0274448	0.0238531	-0.0718595	-0.198793	0.0623616	-0.165293	-0.0243096	-0.0753325	-0.139706	0.18269	0.00740517	0.0352363	-0.0134897	-0.0267524	-0.0856617	0.0900959	-0.102921	-0.378216
GSM1855057	0.169115	-0.161478	0.15887	-0.0886998	-0.135131	-0.00379693	0.0251374	0.181264	-0.048463	-0.0290589	-0.127069	-0.102926	-0.0558927	0.0155325	-0.0577823	0.161159	-0.00239223	0.0664059	0.00692122	-0.0404062	-0.0132025	0.0501028	-0.0277151	-0.290069
GSM1855059	0.06472	-0.18465	0.148306	-0.0329132	0.00874652	0.00489149	0.0470453	0.163344	-0.0352258	-0.0755877	-0.028952	-0.0373179	-0.0304057	0.194059	-0.0516369	0.174377	0.000121599	0.0485337	0.0352688	-0.0582714	0.0260501	-0.162968	-0.077034	-0.326473
GSM1855060	0.0922661	-0.293432	0.127016	-0.132979	-0.083978	0.00168552	0.0510151	0.229963	-0.184242	-0.0305071	-0.090498	-0.0390622	0.0263814	0.180856	-0.161701	0.144323	-0.0736453	0.0336151	-0.0448526	0.0433651	0.0463606	-0.197671	0.0385808	-0.351908
GSM1855061	0.226445	-0.0718808	0.18594	0.159621	-0.103578	-0.0441908	0.101327	0.126944	-0.00815895	-0.0742873	-0.0770056	-0.00405027	-0.0496811	0.1329	0.149401	0.229084	0.00899448	0.0986385	0.0532507	0.117443	0.0332281	-0.129524	-0.0527045	-0.267741
GSM1855062	0.196458	-0.205947	0.126266	0.00949431	0.121767	-0.0197681	0.118744	0.167858	-0.111078	-0.00168394	-0.132618	0.029378	-0.0386143	0.233764	0.0189233	0.206443	-0.0581175	0.0227093	-0.0165434	-0.0495173	0.0520832	-0.154714	0.0367179	-0.1794
GSM1855063	0.170047	-0.165344	0.176222	0.0799718	-0.151413	-0.0242833	0.0885191	0.159488	-0.104514	-0.0390386	-0.0614937	0.0308768	-0.0648789	0.0669838	0.0790357	0.207719	0.023394	0.0645325	-0.0236005	0.0200744	0.0201046	-0.0333924	-0.0512055	-0.27075
GSM1855064	0.168248	-0.201942	0.154343	-0.00076621	-0.043902	-0.00038301	0.0768722	0.190325	-0.10081	0.0733223	0.0383655	-0.0177224	-0.0409578	0.204446	-0.0536068	0.169768	-0.0195791	0.0266222	-0.0685811	0.0202641	0.0314465	-0.172993	-0.013707	-0.312785
GSM1855065	0.0953896	-0.214464	0.144997	-0.0690706	-0.072791	-0.0469276	0.0274209	0.132237	-0.0997843	-0.135463	0.0436301	-0.0670865	-0.0362503	-0.0123289	-0.0879465	0.154872	-0.0465974	0.0396974	-0.013312	0.00455078	0.0118212	-0.140844	-0.029159	-0.27706
GSM1855066	0.0659586	-0.272887	0.151742	-0.0875274	-0.123098	-0.0359886	0.0473619	0.144631	-0.0658484	-0.0743587	0.0758499	-0.108025	-0.0485067	-0.0039802	-0.088673	0.194764	0.0213149	0.0675249	-0.0257478	-0.00622742	-0.0353121	-0.0349439	-0.0268672	-0.432676
GSM1855067	0.0994403	-0.254864	0.159745	-0.010933	-0.0114039	0.0117172	0.0927289	0.16734	-0.0741052	-0.055538	0.0316118	-0.023503	-0.0413294	0.102611	-0.00423851	0.182713	-0.0157031	0.02981	-0.0382232	-0.00196461	0.00838127	-0.0903021	-0.0337627	-0.364819
GSM1855068	0.131629	-0.210267	0.095537	-0.102265	0.0307659	-0.0203768	0.0713172	0.319866	-0.0966529	0.0385329	-0.142224	-0.0411844	-0.0341251	0.283468	-0.113185	0.183408	-0.0423368	0.073412	-0.0622071	0.0274801	0.0071377	-0.128615	0.0243051	-0.337152
GSM1855069	0.143054	-0.179815	0.167771	-0.0348825	-0.106159	-0.0279976	0.0575573	0.115576	-0.158816	-0.10121	-0.122615	0.0329883	-0.0499149	-0.0172799	-0.0269033	0.180852	-0.00716836	0.0274237	-0.044871	0.00841447	-0.0425847	-0.0803528	-0.0662275	-0.331133
GSM1855070	0.262731	-0.102844	0.154908	0.0223398	0.0957744	-0.0122669	0.108181	0.195066	-0.0664264	-0.108212	-0.0117851	-0.0949747	-0.0525496	0.238618	0.0906953	0.185361	0.0163428	0.0577174	0.037897	-0.0534925	0.0457704	-0.135087	-0.0333635	-0.193379
GSM1855071	0.201974	-0.220888	0.153128	0.00692935	0.0625077	-0.0156832	0.12986	0.215419	-0.0634602	-0.108184	0.0175025	-0.071877	-0.0659118	0.14717	0.0897316	0.22704	-0.0402433	0.0345137	-0.0623511	0.00222411	-0.0449696	-0.103912	-0.0536146	-0.24784
GSM1855072	0.145098	-0.00796249	0.17736	0.135513	-0.0663203	-0.0305267	0.0750942	0.171213	-0.116504	-0.0168037	-0.0787807	-0.000264843	-0.040219	0.0626153	0.0682497	0.201412	0.013186	0.0831944	-0.000363921	0.0259802	0.0563871	-0.129575	-0.0534217	-0.276672
GSM1855073	0.136162	-0.213259	0.151429	-0.0229212	0.127159	-0.0101411	0.10809	0.172729	0.0102797	-0.0901724	0.0719036	-0.0768554	-0.0198943	-0.0115523	0.016755	0.19314	0.0314631	0.0671994	0.00412084	0.0294236	0.0439286	-0.0873989	-0.0690682	-0.296573
GSM1855074	0.168086	-0.215696	0.126424	-0.0534391	-0.120607	-0.0235527	0.0851089	0.121113	-0.0596387	-0.143687	-0.0122763	-0.0668047	-0.088993	-0.0457237	-0.0215948	0.202126	0.0271297	0.0718353	-0.0277453	0.0507421	-0.0225626	0.0722745	-0.0474595	-0.30929
GSM1855075	0.135173	-0.196552	0.125789	-0.0919919	0.00717714	-0.00955663	0.103596	0.182914	0.0156149	-0.0959565	-0.0522411	-0.0833287	-0.0268184	0.0789244	-0.0890001	0.162922	-0.00943495	-0.000984974	0.00615301	-0.087231	0.0410724	-0.142026	-0.0442262	-0.338511
GSM1855076	0.283941	-0.0787162	0.208172	0.207139	-0.0726322	-0.0275528	0.0679462	0.167628	-0.0981101	-0.0423889	0.0332463	-0.0130437	-0.041911	0.116785	0.210012	0.198126	0.0200768	0.0754817	0.027913	-0.00418838	0.0594819	-0.12781	-0.0607465	-0.195418
GSM1855077	0.128841	-0.264472	0.155023	-0.00567474	-0.187795	-0.0364881	0.0789968	0.190927	-0.129923	-0.062292	-0.0314174	-0.0497756	-0.0264609	-0.0602854	-0.0971714	0.169547	-0.0108193	0.0654173	-0.0169598	-0.100259	-0.0161409	-0.187449	-0.0748069	-0.305019
GSM1855078	0.261985	-0.176702	0.124883	0.0510738	-0.112529	-0.0494098	0.0310963	0.136687	-0.109582	-0.0741446	-0.0185208	-0.124799	-0.101418	-0.0664013	-0.0177014	0.167002	-0.0335473	-0.0197966	-0.00318561	-0.0870968	-0.0329005	-0.0509938	0.0384945	-0.304339
GSM1855079	0.13452	-0.236739	0.113724	-0.0601628	0.102351	-0.0377589	0.0960066	0.250411	-0.138976	-0.0809748	0.0160162	-0.0232039	-0.0322441	0.104844	-0.0236423	0.143631	-0.0207438	0.0116168	-0.0450437	-0.0287305	0.0386525	0.0266601	-0.0708984	-0.242501
GSM1855080	0.0228449	-0.173141	0.160134	0.00465527	0.0197174	-0.0107482	0.0921018	0.244295	-0.100209	-0.084018	-0.0953982	-0.0287137	-0.0275533	0.0565964	-0.0473598	0.143731	-0.0337891	0.0440902	-0.0082652	-0.112092	0.0484324	-0.11675	-0.0650144	-0.277255
GSM1855081	0.0122639	-0.193592	0.174887	0.0204901	-0.110095	-0.0611211	0.0778751	0.190141	-0.145693	-0.115975	-0.111594	0.00566623	-0.0530564	-0.0374721	-0.0115923	0.166395	-0.00251875	0.0533773	-0.0346848	0.0452584	0.0198718	-0.0486292	-0.0234219	-0.244248
GSM1855082	0.173413	-0.105469	0.185995	0.100829	0.149108	-0.0228757	0.166327	0.244657	-0.011061	-0.0247957	0.00942612	-0.0724771	-0.0787629	0.311038	0.0961292	0.190797	0.0130344	0.0394223	0.00105207	-0.0179322	0.0663646	-0.0361795	-0.0721811	-0.264149
GSM1855083	-0.167073	-0.221406	0.100819	-0.112405	-0.224213	-0.00126743	-0.0387172	0.029564	-0.138939	-0.150439	-0.0405612	-0.0889132	-0.0437737	-0.0905737	-0.150406	0.123061	-0.055998	0.0110569	5.39e-05	-0.021372	-0.0296849	-0.160015	0.0547305	-0.444326
GSM1855084	0.119931	-0.255714	0.146449	-0.00838615	-0.0787305	-0.00205735	0.0383493	0.0689348	-0.0996393	-0.106009	0.00991457	-0.0487323	-0.068817	-0.0843607	0.0184659	0.217784	0.0311793	0.0232682	-0.0972176	-0.0482163	0.0430721	0.0803366	-0.0746109	-0.361518
GSM1855085	0.251165	-0.231816	0.126414	-0.0439227	-0.210009	-0.0158892	0.0177917	0.103543	-0.0673394	-0.0450461	-0.0405013	-0.0442748	-0.0440825	-0.060965	-0.100264	0.136576	0.00181893	0.0068527	-0.0148527	-0.0745622	-0.0290525	-0.0985137	-0.0436426	-0.334434
GSM1855086	0.161335	-0.179507	0.186763	0.115388	-0.0674404	-0.0374816	0.0865642	0.154715	-0.0769828	-0.10999	0.020382	-0.0734935	-0.0648239	-0.00330065	0.0141211	0.142049	-0.0118462	-0.0214486	0.0117437	-0.0996616	0.0588517	-0.0500571	-0.0593536	-0.299583
GSM1855087	0.198811	-0.202833	0.162104	0.0330509	0.00639222	-0.0426868	0.0367508	0.165424	-0.0458062	0.110474	0.0638782	-0.0622054	-0.0123091	0.0147558	-0.0371639	0.156811	0.00123418	0.031374	-0.0337056	0.00799985	0.021149	-0.00584182	-0.0526846	-0.430638
GSM1855088	0.205774	-0.11721	0.188359	-0.0549577	-0.0469325	-0.0608563	0.0356609	0.0825706	-0.114551	-0.139829	0.0779759	-0.10808	-0.0545881	0.00698961	0.00840481	0.191347	0.0564059	0.0328252	0.0334426	-0.072226	-0.0260176	-8.54e-05	-0.079395	-0.283079
GSM1855089	0.171143	-0.213175	0.136059	-0.0207792	0.0429109	0.00395587	0.102408	0.153068	-0.00904598	-0.0387419	0.109269	0.00214914	-0.0305504	0.0482477	0.0082287	0.127929	-0.0445673	0.0226636	-0.0281927	-0.0294115	-0.00597208	0.0189695	-0.0562294	-0.355888
GSM1855091	0.162312	-0.119479	0.166804	0.0424477	0.0691074	-0.0101915	0.0902469	0.223089	-0.0726703	-0.0564895	0.0199704	-0.0109649	-0.0664542	0.205999	0.0508574	0.177048	-0.00476907	-0.000867043	-0.0284372	-0.0897443	0.0332147	-0.0419295	-0.073023	-0.227357
GSM1855092	0.178946	-0.207092	0.157935	0.0910071	0.0810636	-0.0168977	0.133005	0.246722	0.0249462	0.0542889	-0.0458442	-0.00719511	-0.0249989	0.167751	0.0719096	0.177879	-0.0132382	0.0470521	-0.0232712	0.0325784	0.0555399	-0.101412	-0.0631217	-0.227357
GSM1855093	0.216158	-0.0725892	0.182853	0.151118	-0.0298383	-0.0350804	0.123594	0.206232	-0.0498427	0.0285449	-0.088519	-0.0033731	-0.0756661	0.261722	0.188173	0.197755	0.0170303	0.0484219	0.0102105	-0.0124025	0.0749864	-0.0215497	-0.0543674	-0.232405
GSM1855094	0.11402	-0.197932	0.0878339	-0.176416	-0.164948	-0.0472689	0.0177552	0.110851	-0.171874	-0.178684	-0.135803	-0.146277	-0.0757168	-0.136006	-0.159974	0.184392	-0.00582902	0.0196724	-0.0307727	-0.101514	-0.0372892	-0.133271	0.0388425	-0.412678
GSM1855095	-0.0518762	-0.273357	0.136869	-0.0800583	-0.0447618	-0.0587253	0.061537	0.157511	-0.178831	-0.0651778	-0.143614	0.0473699	-0.0381184	0.158625	-0.122271	0.180134	-0.0471535	0.019969	-0.0456181	-0.0415074	0.0722327	-0.194913	0.0482939	-0.217163
GSM1855096	0.197381	-0.0636417	0.139158	0.05036	-0.106064	-0.0115923	-0.00608284	0.108133	-0.191524	-0.155913	0.00999901	-0.0503202	-0.0910852	-0.0963013	0.0766023	0.215805	-0.00795011	0.0357952	-0.016206	0.0115711	-0.0231402	-0.206528	0.0559626	-0.358703
GSM1855097	0.108984	-0.253255	0.125347	-0.0405797	0.0117019	-0.0144685	0.151852	0.217164	-0.0372251	-0.0500626	-0.108487	-0.0718519	-0.0107954	-0.0496068	-0.0838635	0.182878	-0.0251925	0.0567611	-0.0156729	-0.000698973	-0.00880657	-0.0604156	-0.0477833	-0.201631
GSM1855098	0.157376	-0.240545	0.13284	0.0829925	0.0157346	-0.011628	0.122999	0.257062	0.0582956	-0.000428672	-0.0587656	-0.0264174	-0.0211003	0.0039802	0.0221598	0.183269	0.0893053	0.0476525	-0.0396679	-0.015041	0.00237927	0.00890453	-0.113152	-0.3455
GSM1855099	0.00666801	-0.222171	0.151736	-0.117097	-0.0381851	-0.0285204	0.0671796	0.0994837	-0.101305	-0.0719588	-0.0298648	-0.0939896	-0.0318587	0.0039802	-0.0952984	0.186152	0.00874353	0.0499422	-0.0371172	-0.0450649	-0.0242383	0.0788924	-0.10688	-0.332395
GSM1855100	-0.0254512	-0.205926	0.148871	-0.00490767	-0.180408	-0.0401401	0.00721443	0.0395366	-0.0984902	-0.0733311	-0.0395528	-0.0225356	-0.0696005	0.0567906	-0.050453	0.168685	-0.0230396	0.0245962	-0.0623942	-0.0384728	-0.0158523	-0.0241309	-0.0671053	-0.299194
GSM1855101	0.16945	-0.221818	0.110687	-0.145209	-0.0974448	-0.0487774	0.0182918	0.0671463	-0.118625	-0.158048	-0.111477	-0.118027	-0.0815222	-0.000194156	-0.0838115	0.184258	0.0158549	0.00369296	-0.0420384	-0.0841004	-0.0227884	-0.0988299	-0.0531018	-0.295991
GSM1855102	0.227449	-0.0946805	0.166358	0.185821	0.0986853	-0.0209336	0.147547	0.198996	-0.0810437	-0.0395832	-0.105409	0.0207264	-0.0728812	0.143967	0.158309	0.238089	0.0248582	0.0233376	0.0302618	-0.0737487	0.0514121	-0.0862558	-0.0135554	-0.131735
GSM1855103	-0.0224191	-0.131453	0.0763326	-0.122522	-0.208506	-0.0379972	-0.00760066	0.0938236	-0.139124	-0.159574	-0.0460206	-0.0619073	-0.0408401	-0.00097078	-0.0823285	0.182415	-0.0178474	0.00910128	-0.0314652	-0.0131981	-0.136424	-0.137799	0.0903678	-0.315892
GSM1855104	0.0903786	-0.176695	0.107822	-0.139221	-0.181539	0.0418115	-0.0431821	-0.0417492	-0.173238	-0.208994	0.122801	-0.00697474	-0.0388225	0.156101	-0.0534004	0.223756	-0.000685575	0.0777579	-0.0183386	-0.13428	-0.0525313	-0.0263408	-0.0452037	-0.238909
GSM1855105	0.149553	-0.184661	0.154733	-0.00410984	0.0765689	0.018119	0.144073	0.165336	0.0687084	0.00505962	-0.0790428	-0.00477287	-0.0477165	0.171051	0.0676755	0.178799	-0.0189623	0.0442178	0.0074697	0.0131046	0.0166929	-0.0369941	-0.0466274	-0.229784
GSM1855106	0.18794	-0.166511	0.167184	0.151901	-0.0344408	-0.0650195	0.0203274	0.131896	-0.13885	-0.0417561	-0.0414093	0.0175749	-0.0217971	0.148723	0.112981	0.226991	-0.0127022	0.0204141	-0.0259899	0.0375563	0.0481695	-0.0652894	0.0424893	-0.178235
GSM1855107	0.19033	-0.147166	0.14592	0.0969768	0.163093	0.0233955	0.134015	0.191694	-0.0551365	-0.0129233	-0.109123	0.0142461	-0.0301013	0.397437	0.0585931	0.188767	-0.0413642	0.0282628	-0.00690131	-0.0337642	0.0860049	-0.152516	-0.0211354	-0.212212
GSM1855108	-0.121821	-0.276533	0.0764827	-0.202615	-0.149365	-0.0487002	0.0042816	0.17275	-0.0826997	-0.0449533	-0.10987	-0.0531391	-0.0169355	-0.115717	-0.171722	0.174495	-0.0200358	0.00769473	-0.0822568	0.0256801	0.00569246	-0.147181	-0.0497485	-0.340841
GSM1855109	0.182328	-0.171247	0.162169	0.11442	0.0268794	-0.0478334	0.0145568	0.133657	-0.147872	-0.060848	-0.139916	-0.00359285	-0.0424448	0.108242	0.0289019	0.177557	-0.0258842	0.0377468	-0.0198996	-0.0994336	0.0649284	-0.138966	0.0269978	-0.204446
GSM1855110	0.253513	-0.0475735	0.184301	0.142547	-0.0213176	-0.0167223	0.0888134	0.147965	-0.0700723	-0.0457078	-0.098162	-0.00553624	-0.0859816	0.0910591	0.11517	0.198901	0.0147869	0.0466439	-0.00145447	-0.0267057	0.0366408	-0.134112	-0.0486534	-0.199204
GSM1855111	-0.0180839	-0.162526	0.118046	-0.173625	-0.130824	-0.0290988	0.0530223	0.151382	-0.104819	-0.144506	0.0559513	-0.131221	-0.0608219	0.0612562	-0.162842	0.184525	0.0690928	0.0350909	0.00164423	-0.0778181	-0.0076784	-0.0494259	-0.0511211	-0.429085
GSM1855112	0.139625	-0.0272208	0.174653	0.0724725	0.0513659	-0.00620262	0.101734	0.190431	0.00578099	-0.0634513	-0.0869859	-0.0643888	-0.02631	0.0735851	0.0588482	0.199098	0.0163073	0.0539892	0.0491937	-0.00778136	0.0431926	-0.128517	-0.0658031	-0.311426
GSM1855113	-0.00388337	-0.237757	0.174426	-0.0830741	0.176974	0.0228478	0.139186	0.190025	0.0705216	-0.0472635	-0.0183694	-0.0474538	-0.0303891	0.214348	-0.00172906	0.183407	0.00849808	0.0381029	-0.0342497	-0.0364942	0.0454187	0.0431695	-0.0902241	-0.292108
GSM1855114	0.206197	-0.232062	0.178971	0.120765	-0.00274709	-0.0661944	0.0741998	0.141156	-0.0932044	-0.0366122	-0.0523838	0.0351805	-0.0891126	0.054752	0.0630674	0.204454	0.00579813	0.0262197	-0.0442202	-0.0234422	0.00735204	-0.031579	-0.0428774	-0.230754
GSM1855116	0.0992883	-0.234513	0.0899897	-0.148168	-0.188717	-0.0396613	-0.0499178	0.0265717	-0.16651	-0.169182	0.0910495	-0.0781341	-0.0636148	-0.114843	-0.18503	0.215473	0.0282701	-0.0040684	-0.0599399	-0.184179	-0.0519061	0.0227233	-0.0180876	-0.356761
GSM1855117	0.153728	-0.26144	0.117368	-0.0597116	-0.0790091	-0.0315652	-0.0685532	-0.00414898	-0.191505	-0.0836105	0.0133327	0.0328114	-0.125062	-0.0355305	-0.0794589	0.213957	0.0137271	-0.0164373	-0.105997	-0.0372968	-0.0137915	-0.0258276	0.037206	-0.281332
GSM1855118	0.149053	-0.193053	0.134528	0.0273086	-0.0779527	-0.0312842	-0.0264876	0.0819645	-0.158554	-0.088654	-0.0824714	-0.0194748	-0.0642718	-0.0232016	-0.10226	0.176258	-0.0622977	-0.0212039	-0.0298867	0.0211993	-0.0161704	-0.0998807	-0.00413161	-0.365693
GSM1855119	-0.0732466	-0.229483	0.155019	-0.124566	-0.108073	-0.00499405	0.0381591	0.0686915	-0.0825772	-0.141139	-0.068306	-0.0262392	-0.0311479	0.0883409	-0.00973047	0.164509	-0.0179305	0.064165	-0.0746608	0.0202588	-0.0510488	-0.0134332	-0.0429891	-0.267741
GSM1855120	0.195035	-0.138753	0.148893	0.0576177	-0.109835	-0.0672606	0.0329375	0.153307	-0.114452	0.114237	-0.110755	0.0333745	-0.0589502	0.0887292	0.0473386	0.203759	-0.0145285	0.0323832	-0.0272436	0.00758303	0.0470839	-0.175181	-0.0208843	-0.123483
GSM1855121	0.0469967	-0.0288991	0.168885	0.0763165	-0.0968189	-0.0563066	0.0606458	0.183838	-0.040243	-0.0718745	-0.0696856	0.0141195	-0.0241272	0.180274	0.100747	0.188323	0.0150434	0.0517524	-0.040169	0.013079	0.028767	-0.137182	-0.0536822	-0.29036
GSM1855122	0.194678	-0.176159	0.101025	-0.108918	-0.133379	-0.0576241	-0.0467028	0.0693569	-0.135327	-0.0822345	0.0791445	-0.0129217	-0.0299167	-0.137559	-0.0663123	0.232804	0.0679033	0.060261	-0.00652019	-0.104959	-0.00114408	-0.115801	0.0114118	-0.239588
GSM1855123	0.229922	-0.13233	0.13159	0.0646252	-0.0232715	-0.0486722	0.0701419	0.147618	0.00748335	-0.0611982	-0.0504822	0.0183818	-0.0338395	0.168236	0.125064	0.209292	0.0107536	0.0235264	-0.0085678	-0.00848412	0.0257955	-0.19675	-0.0163673	-0.249782
GSM1855124	0.0818848	-0.205252	0.125994	-0.133159	-0.00554979	-0.000397651	-0.0083878	0.0830164	-0.112038	-0.0460691	0.0106547	-0.0538617	-0.0902218	0.102029	-0.1253	0.191079	0.0246295	0.0470978	-0.0385021	-0.0177476	-0.0524554	-0.0129189	0.00110184	-0.33356
GSM1855125	0.166435	-0.273954	0.141079	-0.139915	-0.0748935	0.00491945	0.103061	0.21284	-0.13184	-0.00896091	-0.0948832	-0.0597615	0.0115745	0.0925153	-0.226183	0.133307	-0.0443693	0.0279444	-0.0720034	0.019338	0.0407664	-0.117608	-0.030745	-0.333366
GSM1855126	-0.0175183	-0.248194	0.167767	-0.0718513	-0.0529396	-0.0310681	0.00231181	0.0936282	-0.153277	-0.1351	-0.072729	-0.101445	-0.0795584	-0.037375	-0.156165	0.193313	0.0109074	0.0562547	0.0227212	-0.0421609	-0.0468166	0.0334124	-0.0507338	-0.295602
GSM1855127	0.219654	-0.106035	0.153856	0.0452147	0.0850979	0.000309939	0.129048	0.202727	0.0663086	0.053002	-0.0637357	0.0195882	-0.0152713	0.133191	0.0690459	0.230294	0.0309493	0.0529981	-0.049132	0.0253927	0.0420405	-0.0716617	-0.0565178	-0.283759
GSM1855128	0.188776	-0.259565	0.139596	0.0213075	-0.0147254	-0.0156045	0.0725932	0.308653	-0.1252	-0.0308226	-0.130217	-0.0346916	-0.0691104	-0.0287351	0.0106498	0.189973	0.0171391	0.016576	-0.0528236	0.0709161	0.00798264	-0.107469	0.00957024	-0.387924
GSM1855129	0.224242	-0.0881001	0.189843	0.06084	-0.0629598	-0.0083019	0.10396	0.19016	-0.038829	-0.0560356	-0.153043	-0.0279154	-0.0411643	0.164256	0.100628	0.242466	0.0185425	0.0674154	-0.012068	0.074053	0.0346399	-0.20428	-0.0417605	-0.281235
GSM1855131	0.0689674	-0.247308	0.149298	-0.107826	-0.15958	-0.0152379	0.0255903	0.0760319	-0.0848136	-0.0938849	-0.0625108	-0.0167638	-0.0335564	0.0195127	-0.164146	0.206613	0.0129746	0.0279967	-0.0215511	-0.0300894	0.0231498	-0.0341586	-0.0330844	-0.386564
GSM1855132	0.229232	-0.152905	0.179519	0.103896	-0.0458337	-0.0130259	0.10501	0.215945	0.0218898	0.152737	-0.084814	-0.00791477	-0.0562333	0.166489	0.0662014	0.20794	-0.00117361	0.066395	-0.0152816	0.0567448	0.039012	-0.117119	-0.0180438	-0.341132
GSM1855133	0.168244	-0.118059	0.163205	0.0997301	0.0728646	-0.0318192	0.136391	0.193537	0.00556437	0.0211326	-0.0911292	0.00662212	-0.0309317	-0.0121347	0.0775462	0.2141	0.0389181	0.0943289	0.0235149	0.0626854	0.0303858	-0.0335253	-0.0726832	-0.305116
GSM1855134	0.121894	-0.247976	0.130533	0.0250343	0.0728793	-0.0265809	0.172305	0.292051	2.24e-05	0.044284	-0.0288711	-0.100159	-0.0499963	0.156781	-0.0144207	0.202928	0.00723298	0.0154103	-0.0680219	0.0568658	0.0133133	-0.0495363	-0.0658163	-0.397728
GSM1855135	0.170609	-0.101551	0.130462	-0.0295112	-0.0534606	-0.0420214	0.0283446	0.140333	-0.0686475	-0.0903871	-0.0345376	-0.0424092	-0.0745853	0.0257257	-0.024813	0.191371	-0.00466978	0.0330546	0.00642014	-0.0411444	-0.000865629	0.0481756	-0.00502562	-0.297253
GSM1855136	0.113921	-0.139127	0.175281	-0.0501496	-0.0169269	-0.0481487	0.035372	0.136695	-0.0715144	-0.0468772	-0.126971	-0.030475	-0.0599506	0.0493156	-0.0110113	0.207708	0.0103873	0.0175044	0.0219403	-0.0323979	0.0241055	-0.0165914	-0.0488275	-0.262305
GSM1855137	0.172222	-0.237882	0.127902	-0.0271856	-0.138112	-0.0360251	0.0400128	0.131487	-0.108152	-0.0750586	-0.0784341	-0.0212985	-0.0660476	-0.163576	0.0288949	0.243287	0.0449885	0.0411479	-0.0281244	-0.0183478	0.0327732	-0.166568	-0.0271932	-0.304534
GSM1855138	0.242225	-0.173906	0.186087	0.0914023	0.0014046	-0.0426197	0.00767352	0.15519	-0.120245	-0.0854551	-0.121885	-0.0210187	-0.0665298	0.0798952	0.0209829	0.195876	0.00897056	0.0290597	-0.0258475	-0.00405346	0.0310671	-0.157624	-0.0098714	-0.293078
GSM1855140	0.113917	-0.142885	0.126303	-0.00842235	0.152077	-0.00980374	0.16218	0.299852	-0.0297383	-0.0192166	-0.133712	-0.0623327	-0.0568273	0.424037	0.0158811	0.158063	-0.00341661	0.0496521	-0.00148879	-0.0194032	0.0195501	0.00737514	-0.0351551	-0.187263
GSM1855141	0.00237417	-0.204175	0.168394	-0.0299968	0.0371619	-0.0425503	0.11759	0.196897	-0.0519827	-0.0905953	-0.114522	-0.122263	-0.0175589	0.14319	0.00945608	0.215033	0.0466426	0.0585071	-0.0085769	0.0131387	0.00155656	-0.0331138	-0.0679668	-0.38404
GSM1855142	0.238887	-0.126799	0.174215	0.110467	0.0140464	-0.0342044	0.0472961	0.175764	-0.142777	-0.0958426	-0.0275943	-0.00250699	-0.0824228	0.110572	0.0894677	0.174817	0.0202509	0.0266364	-0.0245198	-0.00318298	0.0438027	-0.121088	-0.0025167	-0.227162
GSM1855143	0.156594	-0.0877365	0.175293	0.0699025	-0.0574279	-0.043133	0.101903	0.135516	-0.0925165	-0.099035	-0.0595652	-0.0486598	-0.0580665	-0.0106786	0.186588	0.216081	0.0778411	0.0907014	0.0626778	0.0022977	-0.00701438	0.000518406	-0.0586321	-0.272498
GSM1855144	0.220409	-0.206095	0.11984	-0.130019	-0.15377	-0.00794991	0.0872102	0.104307	-0.0042997	-0.0221723	-0.141848	-0.0621686	-0.0639531	-0.00883409	-0.0872678	0.214129	0.038288	-0.0147712	-0.0201185	-0.0663984	0.00662331	-0.0484377	-0.0465544	-0.442967
GSM1855145	0.241857	-0.206321	0.17972	0.0492744	0.0373211	-0.030482	0.141675	0.266213	-0.0352135	-0.000504274	-0.0443451	-0.057935	-0.0826633	0.151345	0.0155386	0.183592	-0.0174257	0.043456	-0.00973964	0.0184078	0.0332483	-0.0671844	-0.00834993	-0.285992
GSM1855146	0.177872	-0.148165	0.155639	0.0157027	-0.069538	-0.0543715	0.112894	0.176792	-0.0704311	-0.044568	-0.065887	-0.061466	-0.0794435	0.152607	0.00481469	0.147279	-0.0334329	0.0481772	-0.0211	0.0273431	0.037061	-0.0546916	-0.00478076	-0.376857
GSM1855147	0.200112	-0.10477	0.151063	0.0976472	0.0343557	-0.0368419	0.119924	0.179781	-0.0891942	-0.0748008	-0.0679504	0.00546988	-0.0303435	0.137268	0.0623138	0.181259	-0.0173188	0.0572738	-0.0192932	0.00798019	0.0525995	-0.0650679	-0.0280086	-0.280944
GSM1855149	0.0295361	-0.147249	0.157026	0.0188202	-0.00877266	-0.0414449	0.144567	0.196976	-0.0319299	-0.0738941	-0.06958	-0.0549086	0.00639165	0.111348	0.099792	0.21833	0.043695	0.08587	0.0147084	0.0325359	0.0281011	-0.104543	-0.0514195	-0.268129
GSM1855150	-0.144238	-0.18488	0.168821	-0.10628	-0.155719	-0.0466455	-0.0633351	0.058352	-0.0763435	-0.12944	-0.00367901	-0.035431	-0.0330114	-0.10465	-0.122651	0.141407	-0.0440439	0.0341481	-0.0281035	0.0425427	-0.0528482	-0.172447	0.0600538	-0.289195
GSM1855151	0.173276	-0.186935	0.140388	-0.0552744	-0.12121	-0.00495932	0.0366406	0.178351	-0.164833	-0.121935	-0.103459	-0.100422	-0.082465	-0.0318416	-0.135617	0.178788	0.0514471	0.0479745	-1.14e-05	-0.030896	0.0179181	-0.0943921	-0.0763643	-0.428114
GSM1855152	0.167307	-0.0963609	0.172955	0.00389467	-0.00373222	-0.0241565	0.1345	0.200004	-0.0988045	-0.12878	-0.101438	-0.0739301	-0.0870431	-0.0226192	0.0417854	0.183445	0.0467511	0.0822318	0.00897885	-0.0529228	-0.026233	0.0108521	-0.0655433	-0.234637
GSM1855153	0.0875822	-0.175239	0.145942	0.0354749	-0.191921	-0.0382412	-0.0549189	0.0189435	-0.106974	-0.195481	-0.0108041	-0.00176687	-0.0728706	0.0454325	-0.0490249	0.243417	0.045412	0.0528609	0.0049468	0.0132298	-0.0325398	-0.034233	-0.0414073	-0.317251
GSM1855156	0.243467	-0.0898281	0.160517	0.131589	-0.037439	-0.045425	0.0853069	0.193138	-0.138267	-0.0482587	-0.0659872	0.0421988	-0.0615807	0.159402	0.170107	0.231501	0.0199142	0.0558801	-0.0173882	-0.0462302	0.069766	-0.145639	0.0126546	-0.21862
GSM1855157	0.00253266	-0.209252	0.185439	-0.0344491	-0.020863	0.0132587	0.130345	0.180529	0.0228258	-0.0398118	-0.0492727	-0.0462828	-0.0290632	0.122415	0.00241116	0.183692	0.00878182	0.0626908	-0.00598501	0.0218214	0.0565211	-0.121949	-0.0549165	-0.258907
GSM1855158	0.00851528	-0.107937	0.151659	-0.0882796	-0.0723581	0.0142593	0.0932741	0.073697	-0.110254	-0.105843	0.00151662	-0.0918107	-0.0747319	-0.0450442	-0.00707453	0.237404	0.0829428	0.0128207	0.0173948	-0.0970751	-0.0361723	-0.0645398	-0.0649205	-0.292593
GSM1855159	0.145602	-0.108675	0.165907	-0.00857933	0.161896	-0.023513	0.0484145	0.151125	-0.0273881	-0.137199	-0.0386342	-0.0764674	-0.0495508	0.143578	0.0452333	0.209113	0.0019463	0.0323306	0.0259151	-0.0766757	0.0106799	-0.0587316	-0.0750107	-0.227162
GSM1855160	0.0718835	-0.159965	0.126279	-0.0354968	-0.155684	-0.00349749	0.0190307	0.123636	-0.120983	-0.0828355	-0.0772816	-0.0245958	-0.0720135	0.0819338	-0.0919939	0.189202	0.0315107	0.0196439	-0.0353991	0.00409142	0.00862845	-0.130917	0.0148863	-0.413455
GSM1855161	0.232681	0.0832349	0.191427	0.172201	-0.0787682	-0.0368306	0.0172906	0.137904	-0.12181	-0.0818236	0.00102289	-0.0225956	-0.0763337	0.307834	0.175026	0.217076	0.0390791	0.0627694	0.0122396	0.0786598	0.0797392	-0.136876	0.0243765	-0.25182
GSM1855162	0.0980239	-0.122721	0.181295	0.0186812	0.165677	-0.0494922	0.153917	0.200963	-0.00505237	-0.0733529	-0.109669	-0.108482	-0.0350467	0.0223279	0.0470367	0.1852	0.0199266	0.0560661	-0.00707242	-0.0106091	0.0419783	-0.0909068	-0.0753972	-0.377148
GSM1855163	0.171623	-0.131701	0.15683	0.110836	-0.109463	-0.0239628	0.0854968	0.106637	-0.0750198	-0.0812784	-0.187097	0.00738308	-0.0759298	-0.024949	0.023794	0.193975	0.0415974	0.0328989	0.0343531	-0.00981722	-0.0594585	-0.0296549	0.0242049	-0.338414
GSM1855164	0.101179	-0.206546	0.155626	-0.0279174	-0.125566	-0.0289505	0.0542333	0.172178	-0.139297	-0.0878327	-0.079346	0.00963805	-0.00850233	0.063489	-0.112643	0.173527	-0.0217651	0.048419	-0.0755575	0.0156409	0.0214913	-0.153313	0.046295	-0.272886
GSM1855165	0.0712646	-0.269801	0.181502	-0.0342868	-0.00233935	0.0059354	0.0762172	0.0725671	-0.0279514	-0.0950005	-0.0597857	-0.104853	-0.0421313	0.0405786	-0.0819952	0.208656	-0.000379555	0.0514624	-0.00939135	-0.0180404	-0.012425	0.0425273	-0.0945218	-0.396466
GSM1855166	0.240131	-0.202917	0.180343	0.0933584	0.0126593	-0.0302712	0.011852	0.162745	-0.112587	-0.0864863	-0.0951367	0.0208031	-0.0426775	0.0994078	0.146378	0.193721	0.0203284	0.0827213	0.00354869	0.00981053	0.0626555	-0.0555761	0.00786822	-0.247937
GSM1855168	0.0701661	-0.153096	0.175251	0.0456184	-0.087805	-0.0281093	0.0968765	0.208719	0.0169913	-0.104741	-0.01142	-0.0688824	-0.0355576	0.00902825	0.104643	0.201336	0.0167442	0.110506	-0.0265447	0.0518376	-0.0105158	-0.0981216	-0.0700694	-0.259781
GSM1855169	0.178099	-0.135691	0.218686	0.0824403	-0.072898	0.0191026	0.0849544	0.166418	0.0777539	-0.0202045	-0.0205228	-0.160282	0.00480254	0.25415	0.0799875	0.185889	0.0320393	0.1168	-0.0351443	0.162439	0.0280086	-0.0889518	-0.0779837	-0.404815
GSM1855170	0.112103	-0.174006	0.114331	-0.0998555	-0.0676673	-0.00400888	0.103547	0.164139	-0.0584018	-0.0700125	-0.0470882	-0.125709	-0.0588377	-0.00951364	-0.0885237	0.169804	0.0335222	0.0588762	-0.0438227	-0.0225899	-0.0478855	-0.0679736	-0.0449931	-0.338705
GSM1855171	0.204839	-0.156108	0.118266	-0.0399197	-0.0899516	-0.0768646	0.0456673	0.124979	-0.131024	-0.0392816	-0.0630257	0.00908226	-0.0690353	0.0650422	-0.0358585	0.173801	-0.027704	0.0346404	-0.00375888	-0.00150791	0.0250885	-0.151999	0.0390002	-0.326764
GSM1855172	0.23689	-0.196103	0.134972	0.105079	-0.0229373	-0.0534649	0.0798745	0.164412	-0.00873776	-0.0917011	-0.141151	0.0377306	-0.0417412	-0.0322299	0.107436	0.187461	0.0496795	0.00905718	0.00483089	-0.029031	0.0280289	-0.125921	-0.0286087	-0.016212
GSM1855173	-0.0796843	-0.151152	0.137432	-0.203574	-0.0777389	-0.0223602	-0.0834066	-0.0185852	-0.154416	-0.233395	0.00599805	-0.152804	-0.0948165	-0.0930978	-0.196535	0.181519	-0.00255643	0.093952	-0.0333699	-0.0571552	-0.0785035	-0.0339262	0.00194673	-0.32259
GSM1855174	0.211174	-0.128197	0.155402	-0.0439403	-0.08492	-0.0140117	0.0466134	0.177089	-0.040796	-0.079505	-0.163593	-0.0818458	-0.065988	-0.0961072	-0.00864068	0.166705	0.0198512	0.0643355	-0.00265234	-0.014034	0.0374959	-0.0696387	-0.0227706	-0.26978
GSM1855175	0.227663	-0.0749677	0.189469	0.0987182	0.0852412	-0.0359943	0.0889134	0.222963	-0.0732046	-0.0923982	-0.108168	-0.0465307	-0.0722929	0.0471799	0.158021	0.226587	0.0151189	0.0620754	0.038543	-0.00865805	0.0457412	-0.0819793	0.0311557	-0.0981458
GSM1855176	0.28329	-0.170574	0.168529	0.181037	0.0930549	-0.00940233	0.0608272	0.208334	-0.117149	-0.0349564	-0.0570529	0.0110358	-0.0620718	0.132706	0.15622	0.210612	0.0214233	0.0273636	0.00646531	-0.0417052	0.0696974	-0.0909939	-0.00552323	-0.246093
GSM1855177	0.182002	0.154859	0.193139	0.148182	-0.0122971	-0.0515971	0.0439882	0.130286	-0.130657	-0.152083	-0.0389982	0.000173156	-0.0660738	-0.0134938	0.163663	0.282946	0.0861731	0.0625675	0.0265441	-0.0560582	0.0392866	-0.122972	-0.0435729	-0.274925
GSM1855178	0.124378	-0.24984	0.14902	0.0258721	-0.118259	-0.0189804	-0.01974	0.0331727	-0.139364	-0.0973695	-0.0684443	-0.0134217	-0.107999	-0.186098	-0.0488929	0.228257	-0.0270445	-0.00154132	-0.100706	0.0196209	-0.0366592	-0.0441789	-0.00796992	-0.316086
GSM1855179	-0.0341761	-0.14701	0.150607	-0.0498981	-0.10413	-0.0302901	0.0114106	0.157316	-0.0834472	-0.0705588	-0.091125	0.0147309	-0.0440447	0.0216484	-0.0576146	0.185663	0.00352212	0.0551646	-0.0813754	0.02017	0.0024563	-0.0950814	-0.0146112	-0.279779
GSM1855180	0.15473	-0.184647	0.211601	0.0436325	0.0247845	0.00169144	0.0774799	0.148561	-0.0529767	-0.0337914	-0.0881597	-0.0443922	-0.0317385	0.12824	0.0498185	0.212369	0.0111154	0.0756927	0.0216009	0.037557	0.051581	-0.182106	-0.0364292	-0.26677
GSM1855181	0.105731	-0.133314	0.14877	-0.094436	-0.083171	-0.000675859	0.00384102	0.0828128	-0.054824	-0.0895176	-0.0865479	-0.0403267	-0.0674463	-0.0389283	-0.0902405	0.203844	-0.00588133	0.0223156	-0.0544787	0.00448011	-0.0279736	-0.136242	-0.0148546	-0.406077
GSM1855182	0.0331901	-0.132522	0.118194	-0.165194	0.0268487	0.00863763	0.0244416	0.1742	-0.0633119	-0.13163	-0.0477815	-0.165286	-0.0680969	0.115037	-0.0271092	0.216703	0.0212191	0.0341876	0.0212958	-0.0455962	-0.0131019	-0.0365957	-0.0804874	-0.275216
GSM1855183	0.229115	-0.118012	0.199556	0.143967	-0.067165	0.0130635	0.0626093	0.1719	-0.141622	-0.0695347	-0.00857082	0.0254877	-0.0643191	0.188137	0.159401	0.229813	0.0373981	0.0273308	0.00369399	-0.0480212	0.0790203	-0.0462967	-0.0494889	-0.270653
GSM1855184	0.254413	-0.072454	0.189114	0.142563	0.106252	-0.00133056	0.125095	0.238571	-0.0437705	-0.00758087	-0.0940608	-0.00999544	-0.0495226	0.15581	0.0898464	0.159615	-0.0250404	0.0553066	0.00407128	-0.0845316	0.0601829	-0.0813046	-0.0420923	-0.146685
GSM1855185	0.15057	-0.19966	0.16662	0.0831244	0.00749731	-0.0451241	0.0826064	0.248442	-0.121975	-0.0112547	-0.187153	0.0702947	-0.00802142	0.191729	0.0254871	0.190193	-0.0449839	0.0246611	-0.0227033	-0.0385002	0.0680159	-0.0534615	0.00226821	-0.194641
GSM1855187	0.0163408	-0.201634	0.134655	-0.105048	-0.159735	-0.0046738	0.0272828	-0.00152453	-0.128333	-0.136902	0.0216961	-0.118521	-0.0667092	-0.0824192	-0.10662	0.237311	0.0315357	0.0305673	-0.0353245	-0.0537299	-0.0906601	0.0565417	0.00713134	-0.366955
GSM1855188	0.00663112	-0.23896	0.169223	-0.0234215	0.106081	-0.00858728	0.152112	0.260606	-0.0534714	-0.0224882	-0.131724	-0.0593199	-0.0453102	0.0414523	-0.0471013	0.147651	-0.0392097	0.0484896	0.00287653	-0.0368115	0.0022435	-0.0577415	-0.0260996	-0.277934
GSM1855189	-0.107763	-0.148005	0.143819	-0.0444549	-0.101605	-0.0271965	0.0733941	0.122133	-0.0333018	-0.111566	-0.0216944	-0.0334407	-0.0547924	0.000582468	-0.0747479	0.162968	-0.041564	0.026904	-0.032863	-0.0896195	-0.00498475	-0.017684	-0.0850318	-0.387535
GSM1855190	0.196529	-0.185518	0.129669	-0.0108239	0.191526	0.0153205	0.151686	0.253793	0.000524776	-0.00722361	-0.0359317	0.0574726	-0.0302699	0.317445	0.0483056	0.16494	-0.056485	0.0449436	-0.0493012	-0.0986336	0.0749533	-0.0673978	-0.019958	-0.145326
GSM1855192	0.141435	-0.212015	0.120344	-0.0606006	-0.0228035	-0.03098	0.105763	0.231755	-0.0461052	-0.0489978	-0.101067	-0.0631256	-0.0594625	0.0785361	-0.0817379	0.128702	-0.0402316	0.0693429	-0.0127307	-0.0415721	-0.0212115	-0.02329	-0.0629757	-0.327444
GSM1855193	0.050326	-0.233934	0.126537	-0.122763	0.0779436	-0.03484	0.0825655	0.166995	-0.122389	-0.117962	-0.110743	-0.0246228	-0.0816838	0.190855	-0.0596658	0.165101	-0.0153253	-0.0271857	-0.0106794	-0.0578784	0.0211918	0.0175685	-0.0178735	-0.239491
GSM1855195	-0.0567532	-0.24221	0.149336	-0.15673	-0.052928	-0.0205459	0.0596203	0.180586	-0.0651048	-0.139239	-0.0802317	-0.0708904	-0.00828641	0.144452	-0.168107	0.132036	-0.0156732	0.090279	-0.0352864	-0.0338897	0.0217692	-0.0452328	-0.0643131	-0.390836
GSM1855196	0.125216	-0.292166	0.16298	-0.057546	0.0266956	-0.0197183	0.124871	0.193531	-0.0697315	-0.0458014	-0.123096	-0.0854986	-0.0591664	0.199981	-0.100516	0.134608	-0.0231634	0.0451269	-0.0295576	-0.0465809	0.0185347	0.0163246	-0.0247267	-0.318804
GSM1855198	0.0184436	-0.236154	0.131335	-0.036091	-0.116142	0.00491843	0.036459	0.128817	-0.13832	-0.132317	-0.0524166	-0.0717772	-0.0597016	0.0195127	-0.0799971	0.178887	0.0338934	0.030494	-0.0973141	-0.0378166	-0.0335821	-0.175558	0.0101146	-0.360256
GSM1855199	-0.05469	-0.273609	0.0940813	-0.0876419	-0.16474	-0.0669109	0.030996	0.102087	-0.0540311	-0.0536664	-0.0557161	-0.0535881	-0.0594603	-0.178818	-0.114062	0.152476	-0.0272967	0.053376	-0.0897123	-0.00146459	-0.046969	-0.0558004	-0.0199912	-0.327929
GSM1855200	0.200537	-0.16745	0.145715	-0.124008	-0.0850906	-0.0232883	0.00857805	0.105675	-0.134418	-0.0338462	-0.0438234	-0.0518698	-0.0683838	0.0581497	-0.0693003	0.206118	0.0110606	0.00415482	-0.028213	-0.0328127	-0.056112	-0.125264	-0.00691535	-0.350063
GSM1855202	-0.192509	-0.205761	0.121263	-0.167901	-0.180182	-0.0587995	0.0224143	0.0177138	-0.138086	-0.115194	-0.024254	-0.0843783	-0.0727296	-0.0488302	-0.178191	0.203543	-0.00676445	-0.00549638	-0.0648937	-0.0917049	-0.107683	-0.00657484	0.0630827	-0.367537
GSM1855203	0.154212	-0.242148	0.156995	0.0473417	-0.161957	-0.0391353	-0.00795781	0.113598	-0.0976279	-0.0843451	-0.04843	0.013378	-0.0682629	0.0521309	-0.0163944	0.174463	-0.00909759	0.0299007	0.0166285	-0.0129427	0.0052428	-0.005334	0.0535363	-0.328318
GSM1855204	0.190937	-0.245437	0.151012	-0.165468	-0.180423	-0.0411116	-0.00755196	0.101232	-0.0866076	-0.136061	-0.158547	-0.0784278	-0.0183933	-0.0880497	-0.136568	0.163451	-0.0504288	0.00880745	-0.0364383	0.00233948	-0.00384395	-0.192552	-0.0360677	-0.352199
GSM1855206	-0.0222705	-0.184527	0.137179	-0.0927467	-0.235548	-0.0480765	-0.0792445	0.0232707	-0.194056	-0.152762	-0.0424727	-0.0593337	-0.0275268	-0.16911	-0.161724	0.143344	-0.0343212	-0.0001973	-0.0953194	-0.117958	-0.0905792	-0.0392852	0.0401901	-0.349481
GSM1855207	0.0778647	-0.223411	0.126419	-0.00562906	-0.0229403	-0.078618	0.0156396	0.204853	-0.228723	-0.0452264	-0.147174	-0.0603721	-0.0525557	-0.0804776	-0.0403914	0.208363	-0.0297225	0.0527819	-0.123176	0.040056	0.0292767	-0.272335	0.0802246	-0.253276
GSM1855208	0.220919	-0.126879	0.154871	0.156692	0.0750093	-0.0380991	0.116668	0.248929	-0.0974779	-0.0902306	-0.0256689	-0.0200912	-0.0559141	0.165324	0.148788	0.245033	0.031726	0.0266824	0.00100909	-0.0725375	0.0916827	-0.0490972	0.0144665	-0.302689
GSM1855209	-0.311445	-0.126342	0.14791	-0.166556	-0.239844	-0.0653809	-0.0136361	-0.0333792	-0.158895	-0.208372	-0.0392404	-0.197561	-0.0591289	-0.032424	-0.136149	0.228377	-0.0191573	0.0731168	0.0328618	0.186225	0.0226556	-0.258298	0.034722	-0.312882
GSM1855210	0.257052	-0.172202	0.18674	0.120748	-0.118461	0.00677318	0.086568	0.233888	-0.0379818	-0.0915782	-0.0402401	-0.0908019	-0.0695478	0.0495098	0.072429	0.210422	0.0141438	0.0191387	-0.0324039	-0.00166075	-0.0112248	-0.0611715	-0.00335592	-0.3455
GSM1855211	0.0953236	-0.149211	0.139504	0.048958	-0.0768003	-0.0542982	-0.0155779	0.0589614	-0.0989232	-0.131391	-0.0793935	0.0161062	-0.0934959	0.0228133	-0.00251129	0.180932	-0.0236402	0.0260318	-0.0369792	-0.0566404	-0.0286677	0.0868561	0.0594395	-0.236191
GSM1855212	0.266426	-0.116308	0.193085	0.148289	0.0141855	-0.0386625	0.0884546	0.156126	-0.0958636	-0.132147	0.0254613	-0.0688327	-0.0420597	0.123289	0.236527	0.227699	0.0284036	0.0664853	0.0168405	-0.0514973	0.000591378	0.0290603	-0.0369331	-0.142316
GSM1855213	0.112589	-0.250941	0.122376	-0.138243	-0.0964024	-0.0169724	0.0935995	0.133961	-0.0849125	-0.132973	0.0155513	-0.124125	-0.056497	-0.101835	-0.11123	0.172687	-0.0203631	0.0199474	-0.0467005	-0.0780956	-0.00175078	-0.0590491	-0.0463498	-0.400349
GSM1855214	0.15865	-0.0843623	0.170373	-0.0352203	0.086845	-0.0204329	0.0941767	0.159405	0.010149	-0.0967173	-0.0382276	-0.0680846	-0.0275754	0.0937773	0.0354735	0.180604	0.0125689	0.0609764	0.0117143	-0.0514487	0.0269904	-0.100661	-0.0960085	-0.324046
GSM1855215	0.187941	-0.0654471	0.171634	0.0239759	-0.0255941	-0.00932137	0.140888	0.203671	-0.0317959	-0.0934669	-0.0892696	-0.122754	-0.126404	-0.0451412	0.0914634	0.203249	0.0467166	0.0393619	0.0284221	-0.0161989	0.0509854	-0.129991	-0.0136584	-0.257742
GSM1855217	0.157754	-0.141916	0.199428	-0.0485205	0.112837	0.00782282	0.0613842	0.123813	0.0387407	-0.0762822	-0.068631	-0.120762	-0.0433185	-0.00863994	-0.0156809	0.167976	0.0393958	0.042141	0.00412765	-0.0606749	-0.0100303	-0.0872145	-0.0769684	-0.384817
GSM1855218	0.0488257	-0.124031	0.188161	-0.0528538	0.0493707	-0.0117531	0.140399	0.213252	0.0336081	-0.0637402	-0.0501636	-0.0809126	-0.0593448	0.0799922	-0.00287238	0.199123	0.0322186	0.0312847	-0.000682869	-0.0267814	0.0240722	-0.012378	-0.0467364	-0.352393
GSM1855219	-0.110056	-0.276186	0.118856	-0.12138	-0.146662	-0.0166916	0.0998702	0.149707	-0.0957251	-0.126724	-0.0392397	-0.0966477	-0.068167	-0.0573731	-0.0930739	0.18893	0.00212158	0.029278	-0.108645	-0.0652775	-0.0069704	-0.0418334	-0.0394234	-0.378119
GSM1855220	-0.0465616	-0.212685	0.118595	-0.0580219	-0.147107	-0.0307909	-0.0220016	-0.051476	-0.181918	-0.113938	-0.0324156	-0.0287309	-0.074413	-0.0565964	-0.107331	0.202197	0.000258272	0.0542645	-0.105417	0.0195534	-0.0698117	0.027612	0.0924551	-0.304922
GSM1855221	0.173623	-0.0473486	0.197415	0.0946879	-0.0357837	-0.0597172	0.143628	0.17754	-0.112085	0.0114282	-0.0850756	-0.0622244	-0.112738	0.056014	0.115909	0.23002	0.0238518	0.0659785	0.00705028	0.013616	-0.0199595	0.0184393	-0.0219547	-0.273372
GSM1855222	0.233619	0.015012	0.204937	0.169181	-0.0782154	-0.00159418	0.0749773	0.146048	-0.0858574	-0.0457733	-0.0560322	-0.0424094	-0.085331	0.0156296	0.170027	0.23335	0.0497601	0.0751705	0.0121421	0.0457163	0.0735054	-0.126028	-0.0112174	-0.298903
GSM1855223	0.00988878	-0.128643	0.177823	0.0320776	0.00395732	-0.0467422	0.0807067	0.117246	-0.102109	-0.103209	-0.083261	-0.0847219	-0.0656153	-0.0445588	0.0467448	0.216951	-0.0202157	0.0297945	0.0504414	0.00562098	-0.0109974	0.0502422	-0.0367244	-0.305893
GSM1855224	-0.1114	-0.200533	0.137699	-0.0724467	-0.0827917	-0.0346078	0.0727677	0.214856	-0.177274	-0.0884558	-0.118248	-0.0514981	-0.0147239	0.039899	-0.014819	0.184092	-0.0472531	0.0642902	-0.0708542	-0.0357274	0.0202251	-0.0168238	-0.00937107	-0.226483
GSM1855225	0.0908013	-0.211234	0.0862728	0.0365732	0.0518323	-0.0320577	0.0914	0.0464531	-0.201265	-0.133793	-0.0587708	-0.109731	-0.019262	-0.0329094	0.015027	0.24201	0.000258233	0.0369382	-0.0342959	-0.111121	0.0747123	-0.265848	0.0723616	-0.240171
GSM1855226	0.0887453	-0.212263	0.129054	-0.104305	-0.0820653	-0.0167011	0.0580612	0.142625	0.0296171	-0.062865	0.0494215	-0.121497	-0.0776587	-0.00553344	-0.00108805	0.207191	0.0303836	0.0514595	-0.0193198	-0.0324539	-0.00400631	-0.106575	-0.0288044	-0.367149
GSM1855228	0.0693035	-0.247325	0.130692	-0.0377741	-0.0961823	0.00145978	0.131563	0.198864	0.00588659	0.037235	-0.0680588	-0.0429477	-0.0408861	-0.012426	-0.10278	0.166414	0.0199871	0.023919	-0.0674317	0.000232241	0.0450883	-0.0130954	0.00811429	-0.321231
GSM1855229	0.197767	0.037665	0.212013	0.108762	-0.00445177	-0.0657213	0.126219	0.192288	-0.0926938	-0.0932565	-0.067904	-0.0475581	-0.0496527	0.163771	0.205794	0.20929	0.0407092	0.0437286	0.0180384	-0.0303592	0.0036124	-0.0659462	-0.0696531	-0.135035
GSM1855230	0.262188	-0.176987	0.132848	0.00752695	0.0484919	-0.032899	0.0289788	0.155397	-0.0504656	-0.0870784	-0.0354764	-0.0309628	-0.0670367	0.0196097	0.045369	0.191332	-0.0135556	0.0472051	-0.0286877	-0.089302	0.0483463	-0.110421	-0.0308583	-0.206291
GSM1855231	0.174795	-0.150134	0.113427	-0.127279	-0.217122	-0.0513745	0.00547261	0.109608	-0.0800901	-0.0228043	-0.0240588	-0.0455301	-0.0361238	0.0491214	-0.0937038	0.157658	-0.00188876	0.00542574	-0.0526078	-0.028369	-0.0174251	-0.140156	0.0296897	-0.324435
GSM1855232	0.219398	-0.241017	0.123967	0.0235171	-0.0471077	-0.0306701	0.0876679	0.223396	-0.0841335	-0.0631333	-0.0712523	0.0242438	-0.0347509	0.0872731	0.0519304	0.176337	-0.0466468	0.0196998	-0.0148536	-0.085763	0.0528263	-0.013931	0.0179554	-0.219493
GSM1855234	0.214109	-0.133381	0.149092	0.0566595	-0.0388855	-0.0113764	0.0319504	0.141477	-0.0854853	-0.00322249	-0.103578	-0.00891935	-0.0502183	0.0309679	-0.00651499	0.155791	-0.015093	0.0515041	-0.034276	0.0119891	0.0585147	-0.0857534	0.009032	-0.322493
GSM1855235	0.11483	-0.204733	0.10636	-0.0531942	-0.192032	-0.0257661	0.0468344	0.0695214	-0.12766	-0.150698	-0.0142885	-0.0665653	-0.022459	-0.115523	-0.126363	0.205495	0.0285969	0.00955911	-0.0158744	-0.157567	-0.0144876	-0.194571	-0.0357686	-0.328609
GSM1855236	0.318652	-0.0581437	0.181583	0.133137	0.0481572	-0.0369343	0.150428	0.20889	-0.0663297	-0.111976	-0.133035	-0.0576699	-0.0707287	0.137657	0.128481	0.204443	-0.000593088	0.0457067	0.0223575	0.00090247	0.0229869	-0.0596798	-0.0226944	-0.280264
GSM1855237	0.0562918	-0.210773	0.142667	-0.0940312	-0.153537	-0.0378069	-0.00151258	0.121675	-0.145449	-0.0608935	-0.0553547	0.00862512	-0.0630148	-0.120668	-0.156902	0.180076	-0.0584245	0.0221556	-0.0464177	-0.00834602	-0.0291787	0.0706107	0.00393175	-0.356664
GSM1855238	0.155593	-0.210712	0.127481	-0.051194	-0.16283	-0.0424045	0.073143	0.0611243	-0.0987335	-0.0542879	0.0163523	-0.0590988	-0.0816572	-0.0066013	-0.0734097	0.16867	-0.0153608	0.0699446	-0.0246558	-0.0546674	-0.0745825	-0.0185683	0.0697319	-0.380934
GSM773540	0.00966355	-0.216284	0.111591	-0.142108	-0.176431	0.0180569	-0.00291331	0.0764827	-0.184202	-0.0732381	-0.0901636	-0.0891666	-0.00796228	-0.249587	-0.177518	0.170186	-0.0131981	0.0177562	-0.0324993	-0.143354	-0.0466503	-0.00519608	0.00700734	-0.301621
GSM773541	0.123202	-0.250529	0.121412	-0.070861	-0.0182935	-0.00497467	0.12205	0.239391	-0.0458926	-0.0287076	-0.172564	-0.0489995	-0.00729535	0.101446	-0.0810061	0.169491	-0.0494198	-0.00134429	-0.0510946	-0.0918447	-0.00328075	-0.128012	-0.00822593	-0.172508
GSM773542	-0.117588	-0.235014	0.103722	-0.163434	-0.0413628	-0.0497819	0.0109549	0.182428	-0.0350055	0.0160443	-0.0648497	-0.0398302	-0.011293	-0.390059	-0.0866621	0.166424	-0.0143439	0.0422327	-0.0876394	-0.0522388	-0.0598446	-0.0169453	-0.00338866	-0.221532
GSM773543	0.185924	-0.151135	0.0951518	-0.122007	-0.200671	-0.0248512	0.00667566	0.0448951	-0.0609485	-0.0185766	-0.0491871	-0.0666207	-0.0219956	0.273566	-0.0777505	0.12686	-0.0111909	0.00213527	0.00632857	-0.0902404	-0.00421999	0.0240365	-0.0374807	-0.205902
GSM773544	0.0361773	-0.225902	0.150091	-0.131276	-0.197301	-0.0040504	0.069657	0.115027	-0.106608	-0.0573847	-0.0921686	0.000859863	-0.00463841	-0.411222	-0.125152	0.179223	0.0141216	0.0161299	-0.0232642	-0.116534	0.00520214	-0.0888839	-0.06662	-0.296864
GSM773545	0.235053	-0.196733	0.171358	0.103723	-0.0735472	-0.0524268	0.00358445	0.192131	-0.119132	-0.0558003	0.012624	-0.0345075	-0.0811004	0.196292	0.0614298	0.179967	-0.0213068	0.0226647	-0.0181191	-0.0410329	-0.0355557	-0.0713678	-0.0209029	-0.3123
GSM773546	-0.030942	-0.209809	0.102544	-0.143474	-0.0907236	-0.0742964	0.0466759	0.195365	-0.0847191	-0.109753	-0.101654	-0.0433633	-0.0442929	-0.0866906	-0.100885	0.166258	-0.0476606	0.00188244	-0.0832809	-0.090048	-0.0635304	-0.0824615	-0.0216345	-0.360936
GSM773547	0.119771	-0.213671	0.176598	0.0265969	-0.0573378	-0.00169756	0.020204	0.120326	-0.011029	-0.0332009	-0.120378	-0.0209214	-0.0474387	0.103873	-0.0110443	0.211732	0.0157229	0.0578844	-0.0151527	0.00993271	-0.0312017	-0.0558892	-0.03051	-0.204446
GSM773548	0.0396807	-0.283767	0.118755	-0.120684	-0.153452	-0.0305548	-0.0191849	0.0210035	-0.0537019	-0.120214	0.000130796	-0.0213279	-0.0131206	0.0400932	-0.11727	0.166366	-0.00570796	0.0492857	-0.0182051	-0.110249	-0.0435777	0.0120199	-0.0554796	-0.310649
GSM773549	0.137913	-0.136256	0.139134	0.00351508	-0.0292618	-0.0589582	0.108054	0.254088	-0.0637459	-0.0456859	-0.156297	-0.0487237	-0.0666659	0.123289	0.0354198	0.18768	-0.0178219	0.0280194	-0.0233141	-0.00844739	-0.050224	-0.0500051	-0.0573193	-0.354917
GSM773550	-0.149184	-0.210231	0.11558	-0.131334	-0.250352	0.00739583	0.106434	0.0969815	-0.082622	-0.0139661	0.0261488	0.0250475	-0.0138607	0.0257257	-0.159827	0.163807	-0.0333756	-0.0317716	-0.0928155	-0.12412	0.0202784	-0.0529749	-0.0676176	-0.400058
GSM773551	0.208952	-0.208385	0.186687	0.084386	-0.0587347	-0.0130014	0.144561	0.145856	-0.114382	-0.0813051	0.0215639	-0.0195392	-0.0683577	0.0750413	0.0559556	0.186915	0.0243212	0.0517578	0.00382889	-0.0270401	0.0335175	-0.0578209	-0.0294834	-0.384623
GSM773552	0.130876	-0.25136	0.125503	0.0677362	0.0264169	-0.0898173	0.0390497	0.116431	-0.186054	-0.100518	-0.0765864	0.0534546	0.011828	-0.100573	0.039766	0.157857	-0.0923979	0.0472786	-0.0748594	-0.00553022	0.0326608	-0.289589	0.0455671	-0.114067
GSM773553	0.0748031	-0.260288	0.122233	-0.0759143	-0.0910499	0.00230393	0.0422973	0.0673762	-0.0974516	-0.13495	0.0681432	-0.0658073	-0.0177793	-0.0101932	-0.0304875	0.186647	-0.0683648	0.0231153	-0.0651975	-0.0675307	-0.0526953	-0.0364792	-0.0265485	-0.324629
GSM773554	0.114453	-0.283001	0.129943	-0.0837036	-0.163822	-0.01759	-0.0174577	0.10818	-0.12364	-0.114981	0.0933643	-0.0722562	-0.0306241	-0.093389	-0.106822	0.158597	-0.0355985	0.0252332	-0.0621205	-0.122955	-0.0691955	-0.0301556	0.0024152	-0.272304
GSM773555	0.197117	-0.165791	0.182814	0.0891001	-0.0169553	-0.0654594	-0.00326685	0.079517	-0.195592	-0.0936782	-0.00397174	0.0435492	-0.0605482	0.136395	0.0782414	0.20048	-0.00921654	0.0502578	0.0131124	-0.0191497	0.0617288	-0.0545661	0.0570387	-0.462576
GSM773556	0.123044	-0.207189	0.124338	-0.125161	-0.165602	-0.00141228	0.03158	0.0868395	-0.0537944	-0.107381	-0.00836664	-0.0248385	-0.0339382	-0.110086	-0.124878	0.211374	0.0258937	0.0378843	-0.0189391	-0.126532	-0.0598813	0.0756343	0.0475345	-0.181147
GSM773557	0.11873	-0.172417	0.142792	-0.0320724	-0.14111	-0.0569733	0.0601112	0.0894182	-0.182025	-0.147602	-0.00246861	-0.0452373	-0.0730484	0.153383	0.0186398	0.183643	0.00112259	0.0556979	0.00154882	-0.0425076	0.0138112	-0.201939	0.0421431	-0.203572
GSM773558	-0.165275	-0.245579	0.12709	-0.145475	-0.173636	-0.0185042	-0.03062	0.0246686	-0.0675358	-0.0803463	-0.0106151	-0.0747152	-0.0114653	0.0441705	-0.144969	0.11532	-0.00311893	-0.0434233	-0.0315528	-0.208538	-0.0884758	-0.180986	0.0600243	-0.181147
GSM773559	0.169023	-0.155385	0.115305	0.0724189	0.0485426	-0.0459026	0.11292	0.199758	-0.0759949	-0.0770752	0.0230871	-0.0113827	0.0181959	0.299097	0.0373064	0.153307	-0.0771177	0.0621359	-0.0172047	-0.0179298	0.0958698	-0.0503256	0.00781985	-0.191535
GSM773560	0.200865	-0.0817038	0.132651	-0.0947029	-0.00734596	-0.0613685	0.0549735	0.128854	-0.20008	-0.00468659	-0.0585572	0.0147499	0.0219688	0.0731968	-0.0207231	0.195326	-0.0484705	0.0401518	-0.0270603	0.0276373	0.0452091	-0.239679	0.0230732	-0.255121
GSM773561	0.204417	-0.126963	0.163496	0.0974288	-0.124614	-0.0418458	-0.00423401	0.101384	-0.0957664	-0.109397	0.122129	-0.00235724	-0.0646802	0.193476	0.0778604	0.216485	0.0243582	0.082235	-0.0269625	0.0246668	-0.0347917	-0.0891049	-0.0351507	-0.198524
GSM773562	0.182111	-0.08551	0.124234	-0.0106242	-0.1772	-0.0540302	0.0102352	0.0453896	-0.12061	-0.00453263	-0.0128647	0.0419047	-0.0847266	0.172216	0.0227509	0.202237	-0.0218895	0.0248124	-0.0295545	0.0128131	0.000745745	-0.0375581	0.0526098	-0.380934
GSM773563	0.173284	-0.190498	0.14551	0.022137	-0.0937528	-0.0879417	0.0622057	0.156352	-0.229825	-0.0677501	-0.0594159	0.0120674	-0.0477607	0.145714	0.0274026	0.166168	-0.0354825	-0.00481972	-0.00813097	-0.0676101	0.0382698	-0.0849432	0.0531638	-0.298612
GSM773564	0.180769	-0.196444	0.140966	-0.0372281	-0.0569932	-0.049748	0.106244	0.200593	-0.062728	-0.102454	0.0844936	-0.0355612	-0.048952	0.150665	-0.0472753	0.178053	0.00121547	0.00109858	-0.0146725	-0.0598422	-0.043769	0.0352316	-0.0667839	-0.326473
GSM773565	0.167379	-0.214512	0.136944	-0.0108454	-0.0582842	0.0141166	0.0459503	0.208712	-0.159664	0.0466532	0.00694636	-0.0407834	-0.0200715	0.0662072	-0.0155066	0.15463	-0.0778839	-0.0111234	-0.0761146	-0.0282911	0.0248	-0.128948	0.0177478	-0.38074
GSM773566	0.230734	-0.122704	0.145989	0.00589853	-0.0214903	0.0111178	0.0941329	0.189036	-0.0361784	-0.0716493	0.0449373	0.0109353	-0.019756	0.125619	0.0414012	0.187865	-0.0194424	0.0278349	-0.0545095	-0.0102056	0.0131401	-0.121489	-0.0152598	-0.399087
GSM773567	0.0958158	-0.107519	0.165291	-0.0363335	0.0548255	-0.00706813	0.152035	0.287195	-0.0651796	0.0256052	-0.0757566	-0.0874307	-0.0559086	0.106689	-0.0174154	0.166081	-0.033764	0.0622641	-0.0426179	0.0112955	0.0102904	-0.076061	-0.0535556	-0.427823
GSM773568	-0.0890078	-0.255921	0.154361	-0.0976145	0.0322414	-0.0391873	0.149858	0.304237	-0.120614	-0.0738221	-0.0458813	-0.011509	0.0174771	0.18639	-0.0951729	0.131179	-0.0310067	0.0241731	-0.0366828	-0.0117658	0.0368202	-0.0455991	-0.028562	-0.361907
GSM773569	0.155053	-0.0122231	0.146454	0.0199346	-0.00634389	-0.0833983	0.0689528	0.198197	-0.125347	-0.12666	-0.0763902	-0.117921	-0.10471	0.0559169	0.0318366	0.191051	0.0403708	0.074901	0.0212191	0.00826066	-0.00373436	-0.0167352	-0.0510261	-0.288807
GSM773570	0.192398	0.0327129	0.190361	0.0409738	-0.0970248	-0.035309	0.0334447	0.132373	-0.0645689	-0.0587817	-0.00383903	0.0347907	-0.0958052	0.0229104	0.0929052	0.22966	0.0107411	0.0472332	0.00432678	-0.0227376	0.0205249	-0.0958819	-0.0731607	-0.35414
GSM773571	0.0674493	-0.258293	0.12441	-0.0642218	0.0222535	-0.0436229	0.102837	0.249896	-0.0335032	-0.0729479	-0.106388	-0.0366798	-0.0136958	0.04485	-0.0618209	0.162227	-0.0352749	0.0446493	-0.00988176	-0.0289606	0.0149862	-0.159867	-0.0113463	-0.367246
GSM773572	0.278019	-0.0533758	0.168792	0.148579	0.0407777	-0.0632162	0.0613984	0.221823	-0.141844	-0.0209367	-0.0883261	0.0382098	-0.0309708	0.257159	0.169086	0.210296	0.00841783	0.0466341	-0.0246569	0.0182999	0.0813737	-0.158903	0.0265081	-0.325988
GSM773573	-0.0292847	-0.279372	0.116212	-0.0707514	-0.0530075	-0.0768924	0.0243339	0.245966	-0.152443	-0.0372331	-0.0151927	0.0184808	0.0313709	-0.139307	-0.171616	0.115861	-0.00903434	-0.000488092	-0.158577	-0.039015	-0.0137428	-0.0605383	0.00812697	-0.184448
GSM773574	0.175639	-0.193752	0.117227	-0.0677196	0.0339012	-0.053158	0.0626609	0.221417	-0.104576	-0.0712998	-0.0541917	-0.0131625	-0.0639122	0.109213	-0.020436	0.184958	-0.0387025	0.0435386	-0.014628	-0.0313942	-0.00657018	-0.0918881	0.0407705	-0.30366
GSM773575	0.215299	-0.13715	0.15714	0.103886	-0.192969	-0.00567814	0.0247154	0.1564	-0.150102	-0.035298	-0.0885238	0.0100024	-0.0854306	0.116008	0.0970774	0.180045	-0.002203	0.0264117	-0.0438922	0.00420198	0.0460258	-0.107492	0.00856861	-0.387147
GSM773576	0.170045	0.063438	0.20218	0.17967	-0.0619618	-0.0816162	0.0837881	0.153792	-0.0729596	-0.0334177	-0.0704186	0.00277248	0.0276296	0.114843	0.129824	0.191818	0.0251932	0.0952955	-0.0507516	0.149669	0.0305833	-0.184939	-0.0600523	-0.288807
GSM773577	0.148095	0.0255702	0.164736	-0.00484138	-0.0122035	-0.0146238	0.0849639	0.175137	-0.139564	-0.121943	0.054088	0.0254181	-0.0738918	0.101738	0.06407	0.222716	0.0017479	0.0617326	-0.000291895	-0.00496175	0.0288679	-0.134423	0.0270117	-0.306669
GSM773578	0.226973	-0.228682	0.139001	-0.0848025	-0.0629202	-0.0486916	0.0164148	0.110223	-0.134617	-0.12529	-0.0429119	-0.0296417	-0.0914298	0.0598971	0.00256375	0.190322	0.0140011	0.0299916	0.00668725	-0.0789843	-0.0378411	-0.0980964	0.00978654	-0.196486
GSM773579	0.168702	-0.21742	0.12678	-0.0828669	-0.173873	-0.0515307	0.0535319	0.170145	-0.05538	-0.0913563	0.00131434	-0.0972841	-0.0345245	0.135909	-0.122444	0.195539	-0.0297466	0.0378557	-0.0309155	-0.0349928	-0.00420314	-0.122923	-0.0232453	-0.326667
GSM773580	0.112916	0.00108148	0.194485	0.118047	-0.101084	-0.0297932	0.0993979	0.191621	-0.0493508	-0.0211389	-0.0839714	0.0285156	-0.0324696	0.137754	0.0888183	0.183372	0.0340163	0.0615743	-0.0320247	0.00287564	0.0580081	-0.160032	-0.0191553	-0.160373
GSM773581	0.0780916	-0.174751	0.0949881	-0.0716897	-0.039651	-0.0673427	-0.00521226	0.171822	-0.192721	-0.130228	-0.0459223	-0.0257954	-0.0438858	0.107271	-0.0637966	0.172334	-0.0366092	0.0073385	-0.0760423	-0.0477639	-0.0052781	-0.0464865	0.0714082	-0.297835
GSM773582	-0.0273584	-0.191655	0.128637	-0.119404	-0.0429611	-0.046165	-0.00966056	0.128664	-0.171901	-0.135001	-0.092002	-0.063657	0.0187966	0.109504	-0.0581354	0.148977	-0.0303847	0.0405897	-0.0539261	-0.0990633	-0.0464773	0.011635	0.0218529	-0.248617
GSM773583	0.245019	-0.0397972	0.161391	0.10937	-0.0277945	-0.0570851	0.099228	0.226938	-0.102541	0.0792213	-0.068476	0.0475598	-0.0454416	0.276866	0.153915	0.185904	-0.0373265	0.018411	-0.0527527	0.0138205	0.0424876	-0.102966	0.019655	-0.298709
GSM773584	-0.0417608	-0.230237	0.135955	-0.137338	-0.0402035	-0.0576703	0.0912964	0.272698	-0.136852	-0.0949339	-0.143034	-0.027209	-0.0158596	0.0870789	-0.181217	0.137812	-0.0317101	-0.0268306	-0.0761816	-0.137219	-0.032415	0.0465419	-0.0597567	-0.332007
GSM773585	0.110483	-0.219791	0.13964	-0.0407802	-0.00991515	-0.0638058	0.10258	0.251331	-0.0321285	-0.071191	-0.0498486	-0.00250971	0.0055337	-0.112222	-0.0589493	0.134014	-0.0744617	0.0284202	-0.0410306	-0.0578233	0.0337329	0.0181558	-0.0204144	-0.236676
GSM773586	0.023536	-0.174331	0.112287	-0.0357089	-0.143759	-0.0740839	0.0472776	0.173782	-0.150312	-0.102423	-0.0596167	-0.0171748	4.47e-05	-0.0447529	-0.0165011	0.114524	-0.0717081	0.0212805	-0.094195	-0.0422536	-0.00527109	-0.181923	0.0203905	-0.247258
GSM773587	0.107195	-0.150495	0.113521	-0.13466	-0.112581	-0.0352977	0.061586	0.210571	-0.0864126	0.0053654	-0.0500035	-0.100884	-0.0843903	0.189884	-0.0479823	0.15446	-0.0482892	0.0239063	-0.0733342	-0.0927999	-0.0257048	-0.122015	-0.00501978	-0.385108
GSM773588	0.173993	-0.0537137	0.171283	0.0757097	-0.0444225	-0.0103536	0.0870933	0.159211	-0.0180569	-0.0519596	-0.0461103	-0.044844	-0.0273335	0.20066	0.0901865	0.199121	0.0350716	0.130485	-0.0282985	0.112549	0.015663	-0.210791	-0.0467376	-0.307834
GSM773589	0.225386	-0.113393	0.123046	0.0759221	-0.0900834	-0.057332	0.0747287	0.225431	-0.137745	0.0372365	-0.0422822	-0.0539876	-0.0264028	0.0522279	0.0595796	0.204474	-0.0327108	0.0331765	-0.0428542	-0.0161029	0.0210626	-0.0929798	-0.0222885	-0.202602
GSM773590	0.217382	-0.0556514	0.162341	0.106851	-0.09898	-0.0502957	0.0653029	0.193608	-0.193183	-0.0723066	-0.00463772	0.0598674	-0.0719156	-0.142899	0.154932	0.213063	0.036109	0.0769716	0.00544281	0.0223286	0.0352492	-0.103559	0.0257838	-0.327735
GSM773591	0.20258	-0.262667	0.125655	-0.0394008	-0.104011	-0.0430392	0.0805383	0.226943	-0.0817766	-0.0324868	-0.0603554	-0.045887	-0.019898	-0.0640714	-0.0568931	0.131654	-0.0588629	-0.0103392	-0.0464579	-0.0110644	0.032224	-0.164717	0.0364423	-0.38006
GSM773592	-0.0564327	-0.20561	0.125182	-0.166495	-0.213793	-0.0547115	0.0138661	0.119573	-0.142088	-0.10642	-0.0696113	-0.0176443	-0.0100633	-0.0583439	-0.143087	0.130628	-0.0468759	0.0454557	-0.0537133	-0.0764163	-0.0506237	-0.0511909	0.0277097	-0.267353
GSM773593	0.182395	-0.185232	0.136225	-0.0340662	-0.0733115	-0.0462711	0.126095	0.171366	-0.137722	-0.0799696	-0.077361	-0.0300135	-0.0808595	-0.0148529	-0.00824642	0.193692	-0.0151611	0.0150721	-0.0117617	-0.0219729	-0.0103054	-0.0665259	0.0368475	-0.368896
GSM773594	0.00293742	-0.0848439	0.178349	0.0651339	-0.163426	0.00125317	0.00742116	0.105481	-0.0594812	-0.102068	0.0326146	-0.0593477	-0.0491	0.17144	0.00908403	0.217593	0.0368177	0.0665171	-0.0197215	0.0272603	0.0312129	-0.0579339	-0.0826092	-0.429182
GSM773595	0.176668	-0.175949	0.157384	-0.0159473	0.148984	-0.0291338	0.115458	0.191541	-0.0371365	-0.103047	-0.034211	-0.0786478	-0.0701854	0.101058	-0.0119922	0.192459	0.013952	0.0588342	0.0100326	-0.0153539	0.0348541	-0.183486	-0.068654	-0.263858
GSM773596	0.0455132	-0.216938	0.21234	0.0923981	0.225627	0.00872419	0.172825	0.245975	-0.0288559	-0.0557848	-0.0140504	0.00406275	-0.00550841	0.166974	0.132937	0.174195	-0.0294367	0.116738	-0.0100996	0.0622329	0.0703968	0.00577833	-0.0266547	-0.26978
GSM773597	0.151673	-0.195529	0.143866	-0.0478231	-0.0973338	-0.0132324	0.0739803	0.144663	-0.0664775	-0.0494852	-0.0665579	-0.0212861	-0.00461309	0.0474711	0.0137781	0.189152	-0.0073303	0.0365496	-0.06046	-0.0166241	0.00633551	-0.019671	-0.0228679	-0.3455
GSM773598	0.0194334	-0.209144	0.147468	0.0255467	-0.30583	0.0227485	-0.00582028	-0.000572171	-0.0270485	-0.154941	0.0449364	-0.107199	-0.0768468	-0.141734	-0.0315658	0.167954	-0.0341551	0.0294568	0.00304937	-0.0421334	-0.0269975	-0.231507	-0.0638138	-0.266479
GSM773599	0.0550992	-0.00240782	0.138253	0.0717334	-0.140421	-0.0915155	-0.049664	0.0607178	-0.109839	-0.0323366	-0.0221876	0.0778135	-0.0623741	0.0586351	0.0201188	0.197427	-0.0226477	0.0508365	-0.0240815	-0.0334781	0.00102746	-0.122056	0.0627971	-0.187555
GSM773600	0.22371	-0.109477	0.125204	-0.00108338	-0.101429	-0.0913069	0.0473558	0.195468	-0.153378	-0.0987996	-0.0782589	0.0669787	-0.0272001	0.16911	0.0479684	0.202198	-0.0575611	0.0368673	-0.0278652	0.0195959	0.0173276	-0.086554	0.0528959	-0.331036
GSM773601	0.147235	-0.229022	0.106651	-0.00798729	-0.116694	-0.0562799	-0.0206283	0.0715207	-0.119369	-0.0396132	-0.0363761	0.0101886	-0.019075	-0.0268906	-0.0704932	0.198295	-0.0385975	-0.0296539	-0.0990233	-0.0618986	-0.040719	-0.0250676	0.0145262	-0.171343
GSM773602	0.182598	-0.200824	0.160007	0.0215173	-0.0118812	-0.0341189	0.0750317	0.181091	0.0110425	-0.0311298	0.011346	-0.0569781	-0.0251629	0.303563	-0.00521281	0.196039	0.0280317	0.0643558	-0.0877739	0.00116804	0.023795	-0.171012	-0.0825574	-0.25881
GSM773603	-0.0321988	-0.24099	0.135268	-0.0573542	-0.0791331	-0.0434131	0.0408706	0.112249	-0.119257	-0.120643	-0.098988	-0.0115251	-0.0246162	0.0519367	-0.037507	0.146418	-0.0434819	-0.0192154	-0.052361	-0.0470816	0.0228161	0.0470883	0.0757922	-0.291622
GSM773604	0.220603	-0.108647	0.154488	0.201123	-0.0291493	-0.0120903	0.026982	0.128514	-0.166992	0.0424128	-0.0118801	0.0388366	-0.0228294	0.131055	0.206941	0.206636	-0.017306	0.0155133	-0.0617917	0.0562367	0.0663406	-0.0640547	0.00767043	-0.215319
GSM773605	0.0850698	0.0773185	0.165262	-0.000616387	-0.161784	-0.0309947	0.0831993	0.14363	-0.167226	-0.0219457	-0.023638	-0.000952867	-0.0370873	0.274731	0.0680286	0.214863	0.043303	0.0832702	0.000376955	0.00868592	0.0183492	-0.126231	-0.0343735	-0.186293
GSM773606	0.138462	-0.265862	0.199488	0.200414	-0.0668361	-0.00124802	0.0684572	0.145033	-0.01796	0.0362223	-0.0657617	-0.0346436	-0.0322254	0.466265	-0.00689902	0.18273	-0.0283282	0.121458	-0.0596233	0.125689	0.0219122	-0.105334	-0.0849932	-0.416173
GSM773607	0.100591	-0.220576	0.153974	0.0543013	0.0305133	-0.0216072	0.145299	0.281663	-0.043903	0.00132395	0.0161855	-0.0736924	-0.0652153	0.172508	-0.0554745	0.194512	0.00647013	0.0880999	-0.0564061	0.0270071	-0.0249722	-0.112468	-0.0870442	-0.38938
GSM773608	-0.0780664	-0.125055	0.174316	-0.0551123	-0.0527225	0.00947692	0.02771	0.129925	0.0441956	-0.0681892	-0.115613	-0.121041	-0.0188494	0.04485	-0.0508501	0.21128	0.0321544	0.043986	-0.000729338	0.0234219	0.0105593	-0.20064	-0.0666148	-0.33919
GSM773609	0.0983821	-0.225609	0.179176	0.0286261	0.0484003	0.00920624	0.109025	0.176322	-0.0168335	-0.0508932	-0.0198936	-0.10607	-0.0532397	0.183963	-0.00216847	0.202008	-0.00729663	0.0579932	-0.0333696	0.0354254	0.0278074	-0.0473458	-0.0483514	-0.363654
GSM773610	0.231414	-0.198295	0.162855	0.0432931	-0.00622831	-0.0315409	0.082246	0.206235	-0.110076	-0.0877114	0.0301482	0.0486199	-0.0372274	0.175323	0.0693788	0.177904	-0.0112912	0.0850841	-0.00445102	0.00897922	0.0754944	-0.022169	-0.0406196	-0.361421
GSM773611	0.104981	-0.0527771	0.202934	0.0564878	-0.0401889	-0.0393169	0.0782954	0.219996	-0.11742	-0.0808973	-0.071258	-0.0884764	-0.075158	0.191535	0.129249	0.185598	0.00307712	0.0759084	0.0208312	0.0322604	0.00745057	-0.10059	-0.0354866	-0.447238
GSM773612	0.189627	0.0935896	0.21936	0.109302	-0.094544	-0.0389726	0.0761562	0.173678	-0.167279	-0.0946822	-0.125868	0.0487694	-0.0689035	0.0562081	0.189222	0.238641	0.0669598	0.0889784	-0.0145431	0.071921	0.0492224	-0.141991	0.00359857	-0.205805
GSM773613	0.221285	-0.0611932	0.141746	0.0931928	-0.0539927	-0.0712661	0.0317852	0.130136	-0.133617	-0.0364953	-0.0360729	0.0369111	-0.0579561	-0.0848461	0.0847264	0.194119	-0.0390332	0.0224612	-0.0530283	0.0192984	0.050716	-0.1279	0.0589396	-0.328221
GSM773614	0.156432	-0.224879	0.14663	-0.105164	0.0167948	0.0114977	0.0569375	0.15791	-0.0635056	-0.0900281	-0.0107855	-0.0954774	-0.069639	-0.0717406	-0.0350675	0.18028	-0.00907891	0.0502519	-0.0140258	-0.0891227	0.0277	-0.0791674	-0.077086	-0.274245
GSM773615	0.115152	-0.237021	0.123393	-0.117694	-0.135638	-0.00569185	-0.00361451	0.0541594	-0.132908	-0.134336	0.0573465	-0.105345	-0.0611719	0.05349	-0.0913203	0.17439	-0.0435137	0.021247	-0.0941288	-0.0513698	-0.100418	-0.0213615	-0.0529763	-0.339093
GSM773616	0.16554	-0.16728	0.111195	0.0869399	-0.154135	-0.0969022	-0.00225261	0.0910191	-0.130886	-0.0697711	-0.0584875	0.0686709	-0.0363925	0.151247	0.0158274	0.189203	-0.0124618	0.00629355	-0.0891324	-0.0213941	-0.0205044	-0.059163	0.118549	-0.191438
GSM773617	0.0586442	-0.0950795	0.163757	0.0120809	-0.110274	-0.067277	0.125504	0.157715	-0.0128773	-0.0384971	-0.0146615	-0.0414758	-0.0447724	0.0222309	0.0162251	0.147319	-0.0179043	-0.00889677	0.00133059	-0.0426076	0.010322	-0.0321605	-0.017244	-0.279779
GSM773618	0.0642059	-0.200225	0.164824	-0.0582879	0.0376615	0.0123915	0.117324	0.192352	-0.0434919	-0.107778	-0.114454	-0.0751393	-0.055864	0.0467916	-0.103608	0.137072	-0.0131993	-0.0123282	0.000488141	-0.00385592	-0.0137321	0.0230921	-0.0624348	-0.418891
GSM773619	-0.0313064	-0.245057	0.130675	-0.0385889	0.0243282	-0.0110359	0.162605	0.283414	-0.0386924	-0.0342178	-0.111913	-0.0310672	-0.0332359	0.0868848	-0.0690381	0.153635	-0.00947861	0.0488286	-0.0479792	-0.0486972	-0.0269428	-0.0282496	-0.0405956	-0.281332
GSM773620	0.0412631	-0.240903	0.181643	0.0894545	-0.0427075	-0.0358632	0.0746573	0.188096	-0.0630239	-0.0451101	0.0554936	-0.0458966	-0.0461064	0.0305796	-0.00883679	0.165965	-0.0294198	0.0562658	-0.0738369	0.0311371	0.0338201	-0.0469817	-0.0428242	-0.278808
GSM773621	0.0844014	-0.178631	0.146843	0.0836454	-0.0255807	-0.0766139	0.0600439	0.173124	-0.132023	-0.03188	-0.0960288	0.0877867	-0.0131395	0.179109	0.0268415	0.165587	-0.0332661	0.0164249	-0.0621966	-0.00157695	0.0826408	-0.168928	0.0695443	-0.353849
GSM773622	0.0340296	-0.277889	0.200794	0.110952	-0.0129347	0.0268434	0.0445648	0.146443	0.0294994	0.0220913	-0.00693495	-0.0645857	0.00519221	0.389671	-0.0296916	0.154154	0.0048128	0.080311	-0.100326	0.0766801	0.0447591	-0.168933	-0.0630243	-0.355014
GSM773623	0.00520154	-0.178426	0.157304	-0.0861381	-0.00651097	0.0275336	0.0678084	0.193575	0.0213163	-0.08186	-0.0563283	-0.0457561	-0.0535295	-0.0233958	-0.0171172	0.180458	0.00848602	0.0423902	0.0238462	-0.0330473	-0.0205219	0.0729507	-0.0579161	-0.224735
GSM773624	0.0114779	-0.211584	0.154957	-0.0609906	-0.0396196	-0.0148304	0.0336005	0.0857911	-0.0996348	-0.167232	-0.00910497	-0.0689442	-0.0384515	0.0358218	-0.0231498	0.201658	-0.0219892	0.0498122	0.0218229	-0.014661	-0.110754	-0.057868	-0.0642406	-0.478497
GSM773625	0.111296	-0.18913	0.203402	0.199205	-0.0896659	-0.00549961	0.130515	0.238006	-0.0290664	-0.000770843	-0.0124257	-0.00675857	-0.0226221	0.404524	0.087829	0.170441	-0.0169689	0.070106	-0.0652226	0.0741222	0.0397253	-0.191452	-0.0586824	-0.227551
GSM773626	0.143409	-0.22375	0.157745	0.055926	-0.0865827	-0.0247135	0.0586758	0.161003	-0.102465	-0.0711008	-0.080721	-0.00129424	-0.0564169	0.0976604	0.0280831	0.200814	0.0100577	0.0520129	-0.00521881	-0.0180666	0.0868812	-0.14736	-0.00210228	-0.225609
GSM773627	0.125564	-0.203434	0.139941	-0.0987025	0.0617041	-0.0246056	0.080244	0.190431	-0.0541705	-0.0695465	-0.0606463	-0.0464741	-0.0323132	-0.120183	-0.0294214	0.156289	-0.0401247	0.0639608	0.0280659	-0.0292156	-0.000193879	0.0707483	-0.0209395	-0.371906
GSM773628	-0.0383212	-0.237753	0.10836	-0.175446	-0.0941099	-0.0551537	0.0309858	0.140193	-0.139594	-0.113231	-0.0496693	-0.0375292	-0.0175901	-0.376274	-0.127558	0.191975	-0.0443834	0.0255927	-0.0282054	-0.0693845	-0.0182338	-0.195142	0.0620771	-0.3455
GSM773629	0.0907462	-0.0687931	0.235177	0.140637	0.0698306	-0.0244609	0.15776	0.269563	-0.0172521	-0.0498118	-0.055109	-0.0694361	-0.0639482	0.144064	0.175076	0.220286	0.0351549	0.0637234	-0.0191539	0.0716874	0.029555	-0.0372319	-0.0500434	-0.267741
GSM773630	0.200187	-0.202752	0.140464	0.0295854	-0.144439	-0.0944083	0.0318991	0.114354	-0.246275	-0.065329	-0.0561447	-0.0512788	-0.0503372	0.152898	0.0569381	0.192998	-0.058236	-0.0198115	-0.0199152	-0.0251967	0.0708039	-0.121593	0.110326	-0.312106
GSM773631	-0.0197191	-0.197923	0.148239	-0.152919	-0.13755	-0.035045	0.0722437	0.128936	-0.17218	-0.10058	0.0382593	-0.0764013	-0.0731611	-0.0488302	-0.156292	0.156986	0.00162561	0.0396176	0.0175305	-0.133802	-0.0228878	-0.0804854	-0.0240406	-0.363945
GSM773632	0.114879	-0.241059	0.142064	-0.143966	0.0148161	0.0291069	0.0355518	0.161576	-0.0868794	-0.152838	-0.0792098	-0.0684024	-0.0279152	0.0437822	-0.108831	0.178102	0.0501978	0.0176039	-0.0205816	-0.0733205	0.0304449	-0.132512	-0.0477962	-0.210077
GSM773633	0.161163	-0.10387	0.148742	0.0864631	-0.0781568	-0.0817386	-0.0175209	0.0858532	-0.156551	-0.159488	0.0268391	-0.00573003	-0.0618707	-0.0130084	0.048338	0.219008	0.00902965	0.00847003	0.00474881	-0.0139958	-0.00125303	-0.18158	0.0752877	-0.273372
GSM773634	0.123374	-0.115762	0.205747	0.146773	0.00270375	-0.0258026	0.123639	0.15147	-0.0646642	-0.10285	-0.0101393	0.0135546	-0.0655339	0.0947481	0.140352	0.241595	0.0512215	0.0858322	-0.00582228	0.0417838	0.00461088	0.0481912	-0.0217032	-0.234734
GSM773635	0.147127	-0.00638817	0.201733	0.0880513	0.106123	-0.0072556	0.105399	0.194495	-0.0467449	-0.08337	-0.0245937	-0.00650851	-0.0849591	0.243083	0.156864	0.228265	0.0557522	0.0732046	-0.00639404	0.0577957	0.0534558	-0.0390983	-0.0196027	-0.207941
GSM773636	0.0580756	-0.110778	0.137842	-0.0723629	-0.0360346	-0.0801032	0.012719	0.0740849	-0.113469	-0.165462	0.00126194	-0.0376039	-0.0590772	-0.458014	-0.0601626	0.168414	-0.0448803	0.0561014	-0.0402287	-0.0786094	-0.0263992	0.0329767	-0.0093371	-0.326959
GSM773637	0.108338	-0.224091	0.164052	-0.00481405	0.0349315	0.00903171	0.131371	0.216882	0.0374054	-0.0328446	-0.0595314	-0.0613436	-0.058868	0.120862	-0.0321293	0.16087	-0.00932016	0.0153857	-0.0262452	0.00904652	-0.0141708	-0.00140045	0.0116189	-0.290943
GSM773638	-0.144496	-0.0960464	0.193053	-0.0259401	-0.185637	-0.0122477	0.00071071	0.0751047	-0.0689092	-0.107658	0.0611378	-0.11399	-0.0307327	0.00902825	-0.0199973	0.211571	0.0228264	0.0604881	-0.0523589	0.00729261	0.00878061	-0.153704	-0.0854895	-0.392389
GSM773639	0.0681678	-0.137135	0.108107	-0.124988	-0.0803682	-0.000762696	0.0795641	0.148676	-0.150973	-0.146725	-0.136887	-0.0741038	-0.0463574	-0.19833	-0.0882605	0.164047	-0.0433332	0.0597282	-0.0426372	-0.107209	-0.0192478	-0.0238194	-0.00783587	-0.167848
GSM773640	0.0194437	-0.183023	0.126605	-0.0880557	0.0311738	-0.0174261	0.10747	0.205887	-0.114381	-0.0997975	-0.145033	-0.0964028	-0.0135756	0.0255315	-0.103707	0.166826	0.000108304	0.046074	-0.0461419	-0.0326237	0.00477396	-0.10854	-0.0553201	-0.321522
GSM773641	0.0552687	-0.172888	0.138332	-0.147861	-0.0937657	-0.0625476	-0.00663826	0.0646048	-0.0739371	-0.136397	-0.0421761	-0.15625	-0.0456991	-0.0334919	-0.0985549	0.138977	-0.00789151	0.0139219	-0.00921886	-0.113135	-0.0606384	0.0135909	-0.0316306	-0.365401
GSM773642	0.0705993	-0.225194	0.0919437	-0.131256	0.0225553	-0.0538154	0.0861538	0.0925402	-0.15193	-0.110757	-0.0408326	-0.132545	-0.0873517	-0.0265023	-0.0525988	0.18792	0.0105273	0.0516196	-0.0504126	-0.0583708	-0.062392	0.0647834	-0.0369945	-0.3455
GSM773643	0.267015	-0.145177	0.150721	0.0794109	-0.172307	-0.0865596	0.0838799	0.126114	-0.166594	-0.0128547	-0.0217736	0.0380934	-0.0470442	0.181245	0.0893929	0.174425	-0.00711788	0.0243724	-0.00650943	0.0120381	0.015559	0.00451528	0.0460326	-0.38006
GSM773644	0.204519	-0.220262	0.143438	0.120611	-0.115084	0.00117133	0.123263	0.169899	-0.148615	-0.0931515	0.0168724	0.0180148	-0.0629135	-0.116396	0.097741	0.17302	0.0177019	0.0530766	-0.0631578	0.0168291	0.0217126	-0.0842173	-0.0378661	-0.331715
GSM773645	0.0290151	-0.234178	0.100076	-0.194879	-0.279016	0.0217267	0.0161673	0.0486886	-0.174304	-0.11692	-0.167891	-0.0644984	-0.0303177	-0.448306	-0.234679	0.186579	-0.0230502	0.0125518	0.00468807	-0.15617	-0.0129477	-0.00670301	0.00754576	-0.285797
GSM773646	0.232821	-0.0601428	0.164925	0.0843527	-0.061897	-0.0159757	0.084836	0.180173	-0.0506081	-0.0789286	-0.0734888	-0.0063441	-0.0417874	0.0588292	0.132817	0.214238	0.014883	0.0693956	-0.0231556	-0.00711348	0.0759366	-0.080847	-0.0345425	-0.417824
GSM773647	0.226093	-0.0860436	0.14958	0.0613963	-0.0368449	0.0129291	0.0821823	0.130676	-0.125901	-0.0827985	0.0129414	0.0435999	-0.06994	0.123677	0.0970016	0.205429	0.00161529	0.056642	0.0115468	-0.0151976	0.0238156	-0.0580181	-0.0407449	-0.1794
GSM773648	0.216534	-0.211769	0.115813	-0.179708	-0.144602	0.00690739	0.0818748	0.194577	-0.128119	-0.0810662	-0.167286	-0.0877906	-0.0669611	0.0309679	-0.166713	0.195355	-0.0328711	0.0323461	-0.0465411	-0.0988258	-0.0155221	-0.0325065	-0.0510709	-0.337734
GSM773649	0.203298	-0.197094	0.114881	-0.0280727	0.0455684	-0.0654541	0.112878	0.266268	-0.0274802	-0.0185772	-0.0782705	0.0409368	-0.0415922	-0.0309679	0.0569331	0.184959	-0.0702279	0.0357526	-0.0226228	-0.0247198	0.0101775	-0.0840233	0.0764469	-0.147947
GSM773650	0.177186	-0.185663	0.115417	-0.207974	-0.077673	-0.0157266	-0.0340755	0.0577056	-0.126696	-0.180522	-0.103771	-0.119137	-0.0473848	-0.146879	-0.089161	0.20949	0.0451403	0.0366899	-0.0294688	-0.0841592	-0.0510337	-0.0570675	-0.0506753	-0.17707
GSM773651	-0.0776235	-0.266476	0.0922843	-0.219288	-0.254695	-0.0622282	0.0570087	0.0871722	-0.156267	-0.126044	-0.133977	-0.0511679	0.0287902	-0.163479	-0.237543	0.169221	-0.0539632	0.0299964	-0.0215936	-0.123776	-0.0806917	-0.307654	0.0219844	-0.363654
GSM773652	0.155787	-0.177585	0.141465	0.0643882	-0.0742309	-0.0470194	0.0629063	0.176687	-0.0525585	-0.1038	-0.0225776	-0.0805364	-0.0598226	-0.302495	0.0552546	0.184053	0.00798435	0.0406039	-0.00401972	-0.0229932	-0.00711589	-0.0172671	-0.0327514	-0.344238
GSM773653	0.153798	-0.180521	0.165018	0.0228772	0.00339877	-0.0341916	0.172404	0.185543	-0.064143	-0.0887249	-0.0858469	-0.0528349	-0.0677681	0.0965926	0.0344106	0.175691	0.0383375	0.0841613	0.0214538	-0.0199622	0.0162472	-0.0976977	-0.0355912	-0.271333
GSM773654	0.243664	-0.150135	0.139816	0.156362	0.0667181	-0.0507358	0.0950417	0.234447	-0.152725	-0.0824291	0.00937066	0.0103463	-0.0502981	0.194835	0.131407	0.203016	-0.00635426	0.0589073	-0.00209122	0.0250771	0.061096	-0.0385878	0.0142566	-0.325891
GSM773655	0.226788	-0.0480588	0.12985	-0.164838	-0.071869	0.0118455	0.00184811	0.0869115	-0.157855	-0.138239	-0.0732175	-0.0525634	-0.00901608	-0.472575	-0.12164	0.169773	0.00737312	0.0561935	0.0280371	-0.130633	0.000234733	-0.0421852	-0.0848361	-0.389477
GSM773656	0.193027	0.00463171	0.198526	0.100842	0.0648672	-0.0170898	0.0787879	0.133839	0.0320455	-0.0395006	0.0220825	0.00121797	-0.0270295	0.183671	0.036457	0.190328	0.0214092	0.108338	-0.0201556	0.0436424	0.0470353	-0.232275	-0.0533171	-0.218522
GSM773657	0.122507	-0.202498	0.181128	0.0639821	-0.0236766	0.0205436	0.129715	0.22347	-0.0190476	-0.074242	-0.0795638	-0.041465	-0.0477635	0.0737792	0.0746981	0.198578	0.00991881	0.0897105	-0.0083186	0.0272544	0.0378113	-0.127429	-0.0302428	-0.397437
GSM773658	0.258933	-0.204516	0.0918254	-0.111391	-0.0888021	-0.0831205	0.0295621	0.12071	-0.114286	-0.128513	-0.0373226	-0.0222697	-0.0120875	0.00883409	-0.16426	0.153454	-0.0464853	-0.00447321	-0.0472271	-0.118853	-0.0228697	-0.160509	0.0784261	-0.390448
GSM773659	0.187331	-0.184304	0.094279	-0.0656451	0.0831563	-0.0592019	0.0466393	0.183602	-0.107843	-0.0196275	-0.0392253	0.0158997	0.00335392	0.0298029	-0.0641758	0.182156	-0.073503	0.0233399	-0.00791311	-0.0934943	0.051285	-0.201623	0.06722	-0.323852
GSM773660	0.255934	-0.198001	0.0990416	-0.130063	0.0708391	0.013081	0.15599	0.158626	-0.0922854	-0.116415	-0.14379	-0.090189	-0.041129	-0.0589263	-0.0425435	0.199825	-0.0361715	-0.0113423	-0.00706166	-0.0722399	-0.0103522	-0.11345	-0.0517687	-0.400641
GSM773661	0.213934	-0.143155	0.141993	-0.00180681	0.0181343	-0.0175937	0.0984602	0.227176	-0.0880001	-0.0657685	-0.0981824	0.0685571	0.0059146	0.00194156	-0.0222838	0.185498	-0.0588114	0.0322188	-0.0233787	-0.0393183	0.037913	-0.0748245	-0.00614529	-0.435783
GSM773662	0.116956	-0.0437431	0.224855	0.18536	0.0646761	-0.0271804	0.157732	0.217354	0.0450662	-0.0239004	0.0316617	-0.0902712	-0.0470605	0.239103	0.139329	0.194235	-0.00783971	0.063066	-0.0235529	0.0679922	0.0662945	-0.0444793	-0.0679147	-0.320648
GSM773663	0.0613558	-0.191896	0.14223	-0.0826233	0.0706973	-0.0329624	0.100324	0.147568	-0.042432	-0.0303157	-0.0167381	-0.0461323	-0.0463653	0.0688283	-0.0733348	0.177014	-0.0276391	0.0313425	-0.00143909	-0.060743	0.0623514	-0.118088	-0.0650676	-0.204932
GSM773664	0.0891043	-0.236466	0.102977	-0.158272	-0.0688732	-0.00895564	0.0701147	0.245274	-0.09842	-0.0982901	-0.0809282	-0.0555263	-0.0665514	0.143967	-0.0867061	0.168186	0.0310758	0.0767598	0.0113728	-0.0842611	-0.0442023	0.0196865	-0.0323393	-0.282206
GSM773665	0.27206	-0.0891285	0.137366	0.119567	-0.129158	-0.0634641	0.118329	0.21244	-0.116123	-0.0165525	-0.0150522	0.0263026	-0.0512133	0.0596059	0.112152	0.205654	0.0294607	0.0602949	-0.0585214	0.00335083	0.0792462	-0.0425796	-0.00347536	-0.210756
GSM773666	0.203852	-0.198181	0.164656	0.0855055	-0.0235419	-0.0197641	0.11924	0.165789	-0.0480227	-0.0994241	-0.0431626	0.0207608	-0.0808451	-0.0519367	0.0132458	0.193612	0.024261	0.0875617	-0.0224022	-0.0157378	0.00160469	-0.18042	-0.0217613	-0.451315
GSM773667	0.239843	-0.143994	0.164318	0.115973	-0.00320575	0.00633609	0.038215	0.157258	-0.125487	-0.0574946	0.0447745	-0.116622	-0.0442744	0.0114552	0.0496148	0.205918	0.0131273	0.0388273	0.0036701	0.00266392	0.0571428	-0.182048	0.00737517	-0.295117
GSM773668	0.136226	-0.222485	0.138579	-0.117288	-0.0763553	0.0107864	0.0326032	0.0989891	-0.121637	-0.103686	-0.00626019	-0.0726107	-0.052315	-0.173284	-0.123194	0.190732	0.00618116	0.0645075	0.0174582	-0.119262	0.011232	-0.0360599	-0.0734895	-0.241724
GSM773669	0.233874	0.0304166	0.160818	0.0405936	-0.0629062	-0.0130291	0.0155068	0.114495	-0.0809998	-0.0505517	-0.0433055	0.00404302	-0.0693355	0.0976604	0.125562	0.229128	0.0389636	0.0627675	0.0120005	0.0130006	0.0261237	-0.141042	-0.0458208	-0.339579
GSM773670	0.160446	-0.149778	0.140049	-0.0815127	-0.0720149	-0.027654	0.0518924	0.224815	-0.0438653	-0.103504	-0.109021	-0.0368197	-0.0503782	0.066013	-0.0401594	0.187679	0.017676	0.0303121	-0.0186477	-0.0796777	0.0278686	-0.131929	-0.0412264	-0.288516
GSM773671	0.122782	-0.230144	0.146786	-0.0111952	0.0873512	0.0138395	0.125533	0.251297	-0.0131717	-0.0916096	-0.0632412	-0.0491724	-0.0613623	0.0177653	0.0708703	0.210754	0.0483902	0.096828	0.00349653	-0.035679	0.015692	-0.0416913	-0.0236003	-0.225803
GSM773672	0.273224	-0.109172	0.179247	0.0490734	-0.0866685	-0.0092956	0.0316758	0.10806	-0.159035	-0.121063	-0.0846004	-0.0174403	-0.0933502	0.110281	0.0978385	0.247223	0.0542007	0.0775555	0.0269412	-0.026236	0.0367824	-0.141851	-0.0638965	-0.30832
GSM773673	0.162512	-0.175186	0.0993915	-0.120928	-0.122361	-0.0346218	0.0511859	0.124544	-0.110053	-0.03756	-0.0958943	-0.0629803	-0.0791542	-0.166003	-0.0805308	0.168029	-0.0411139	0.0301361	-0.0243184	-0.131585	-0.047718	-0.173553	-0.0197706	-0.331327
GSM773674	0.207542	-0.119807	0.137721	0.18594	-0.113469	-0.0794296	-0.016933	0.112801	-0.201027	0.0840652	-0.0245095	0.0997624	-0.0330898	0.246578	0.152374	0.207863	-0.0455486	0.0378746	-0.0753375	-0.00748482	0.105517	-0.127291	0.0721783	-0.199884
GSM773675	0.0816663	-0.177175	0.122276	-0.175686	0.0118082	-0.00254458	0.0996405	0.208949	-0.066021	-0.062933	-0.0674434	-0.0771713	-0.0562677	0.0188331	-0.135894	0.170707	-0.0211105	0.0220794	-0.0156713	-0.0991321	0.0217075	-0.0499259	-0.0295961	-0.252306
GSM773676	0.189628	-0.194423	0.153237	0.0629593	0.0786756	0.0073698	0.185047	0.256959	-0.0669636	-0.0466082	-0.0246374	-0.0256786	-0.0503616	0.354917	0.0671772	0.177883	-0.0241557	0.0304371	-0.0329431	-0.0068596	-0.00506149	-0.129335	-0.0245525	-0.319872
GSM773677	0.267	-0.0568018	0.137121	0.101404	-0.0680988	-0.0397496	0.143946	0.186407	-0.13012	-0.0333172	-0.0133795	0.0693868	-0.0412304	0.111251	0.158676	0.216764	0.0189974	0.0383944	-0.0119111	0.0207645	0.0900231	0.0252724	-0.0403869	-0.338899
GSM773678	0.156828	-0.20204	0.133646	-0.0662249	-0.106457	-0.0357441	0.0334146	0.158059	-0.119551	-0.0642962	0.0290075	-0.0475316	-0.04089	0.284633	-0.0373706	0.181035	0.00382508	0.00426757	-0.010395	-0.0360283	-0.00774024	-0.175199	0.025809	-0.284147
GSM773679	0.238965	-0.0867675	0.189914	0.192769	-0.00659276	-0.0143413	0.0774174	0.235915	-0.110562	-0.0666779	-0.00883483	0.0621474	-0.0300961	0.20697	0.159183	0.231621	0.017189	0.0553033	-0.0486909	0.0300931	0.0700832	-0.124397	0.00560665	-0.42491
GSM773680	0.203134	-0.0734083	0.153642	-0.0206292	0.0113705	-0.00368312	0.0742373	0.184565	-0.0686544	-0.0728835	-0.0140998	-0.0130964	-0.0449423	0.242501	0.0444556	0.182486	-0.009327	0.0662357	0.00334468	0.00164576	0.0487717	-0.064845	-0.0790081	-0.275798
GSM773681	0.095288	-0.112889	0.18949	0.0333985	-0.0518023	0.00649956	0.0644579	0.119401	0.00754191	-0.0756025	0.00621967	-0.148485	-0.0323735	0.19901	0.0470782	0.206181	0.0292812	0.0941418	-0.035322	0.0607227	0.0506128	-0.157986	-0.101088	-0.253276
GSM773682	0.0791658	-0.177118	0.14566	-0.00477733	-0.0107746	-0.0555261	0.113717	0.181302	-0.0418049	-0.0696868	-0.0653788	-0.0254845	-0.0352868	0.0182507	-0.0183168	0.190519	-0.00219908	0.0780069	-0.0162256	0.00231678	0.0501096	-0.0274396	-0.0724519	-0.348801
GSM773683	0.0130114	-0.285169	0.116375	-0.173266	-0.0303211	-0.055607	0.0441533	0.0942526	-0.119535	-0.140143	-0.0944517	-0.0451165	0.0233597	-0.0841666	-0.186187	0.145024	-0.0476412	0.00105787	-0.0129513	-0.157376	-0.0409185	-0.130144	0.0458565	-0.430541
GSM773684	0.0778119	-0.182952	0.146873	-0.00527151	-0.0223596	-0.0129896	0.0620999	0.126512	-0.093591	-0.134653	0.0133713	-0.038006	-0.0824812	0.0429085	0.042648	0.188135	0.00713324	0.0652192	-0.00295955	-0.0122198	0.00360859	0.0224422	-0.0741941	-0.273954
GSM773685	0.111579	-0.2542	0.153239	-0.0366361	-0.02899	-0.0111767	0.0897683	0.175605	-0.0174805	-0.0620498	-0.0427545	-0.124228	-0.044518	-0.016212	-0.0302115	0.145785	0.0170978	0.0419749	-0.0123864	-0.0443014	0.0536584	-0.068984	-0.0571519	-0.225415
GSM773686	0.00902271	-0.215326	0.182924	-0.0217981	-0.00536658	-0.0264802	0.114896	0.170344	0.0158837	-0.0753029	-0.0419762	-0.139701	-0.0458414	0.0827104	-0.0532919	0.201003	0.0204398	0.0646591	-0.0102431	0.0460169	-0.0075631	-0.0799045	-0.0757596	-0.314727
GSM773687	0.0189347	-0.252168	0.171846	-0.0800632	-0.0868568	0.0231926	0.0862431	0.23008	-0.0442399	-0.043346	-0.0745069	-0.0628769	-0.0267609	0.21095	-0.136906	0.152934	-0.046995	0.024138	-0.0559004	-0.0589219	0.0753348	-0.141286	-0.0689155	-0.422192
GSM773688	0.0364543	-0.0914247	0.160686	-0.0297957	0.0610246	-0.0186955	0.0894743	0.260081	-0.0736772	-0.0666526	-0.0675551	-0.0289563	-0.0391774	0.157169	0.038941	0.145234	-0.0217257	0.0643681	0.0178195	-0.0177779	0.032558	-0.11763	-0.0288388	-0.231725
GSM773689	-0.00162123	-0.135739	0.17735	-0.0427239	0.00854677	0.000785483	0.123536	0.111582	-0.0107643	-0.100593	-0.0389125	-0.0940746	-0.0646407	0.0608679	-0.0148308	0.176946	0.0326487	0.0570935	0.0321813	-0.0369662	0.024106	-0.0365334	-0.0805551	-0.39899
GSM773690	0.0362173	-0.170589	0.164988	-0.0879631	0.0066221	-0.0118247	0.0812316	0.166084	-0.0472903	-0.0625021	0.000952921	-0.0268758	-0.0635524	0.211727	-0.0102868	0.141622	-0.00699399	0.0449154	0.00263945	-0.00323139	0.035809	0.00798523	-0.0382235	-0.326279
GSM773691	0.0450319	-0.167904	0.165708	-0.0699458	-0.0390493	-0.00355079	0.0592342	0.105867	-0.0893431	-0.127369	0.0238079	-0.0987684	-0.0748469	-0.180468	-0.0720495	0.201648	0.0347821	0.0378442	-0.0224942	-0.0495988	0.00599409	-0.0657519	-0.0306646	-0.233764
GSM773692	0.131053	-0.146653	0.170934	-0.0334558	-0.042099	0.0216262	0.0693009	0.139285	-0.0297837	-0.0101596	0.00198152	-0.0123301	-0.0689077	0.223959	-0.0101969	0.175376	0.00460172	0.0437043	-0.0374219	-0.0456165	0.05623	-0.0063754	-0.053714	-0.365401
GSM773693	0.0251887	-0.196164	0.181838	-0.0399946	0.110645	0.0256434	0.123162	0.209724	0.0174963	-0.0684552	-0.0527453	-0.0459486	-0.0553959	-0.199592	-0.0376329	0.16493	-0.00462312	0.0341104	-0.0212964	-0.0123003	0.0125697	-0.0592392	-0.0611682	-0.298709
GSM773694	0.21797	0.0989121	0.176581	0.136325	-0.0833433	-0.0411559	0.0339582	0.166152	-0.114758	-0.0831717	-0.032944	0.0355667	-0.0542735	0.199689	0.179274	0.221337	0.0410117	0.0643967	0.0262584	0.0170526	0.0434678	0.00665983	-0.0199663	-0.295699
GSM773695	0.081886	-0.184349	0.203751	0.0187465	-0.0297061	0.0177994	0.110346	0.159641	-0.0150144	-0.032568	-0.0385606	-0.0535038	-0.0132922	0.164547	0.0217687	0.199654	0.0147281	0.0736693	-0.040729	0.0796429	0.0721761	-0.215097	-0.0579722	-0.276963
GSM773696	-0.0826538	-0.202451	0.155345	-0.0671505	-0.0338241	-0.0243038	0.0358925	0.152657	-0.0445864	-0.16239	-0.0539029	-0.116056	-0.0473549	0.0321328	-0.055724	0.159628	0.0422839	0.0806754	-0.00940152	-0.0159662	0.00137092	-0.0154417	-0.0726787	-0.273177
GSM773697	-0.123132	-0.242189	0.110178	-0.140974	-0.0961484	-0.0406238	-0.00776163	0.0722261	-0.132584	-0.134418	-0.0395969	-0.0176353	-0.0423012	-0.19435	-0.217236	0.178768	-0.0262338	0.0184007	0.0277126	-0.270942	-0.00907484	-0.145757	0.00899483	-0.342394
GSM773698	0.210865	-0.129293	0.141592	-0.0318719	-0.241836	-0.0321805	-0.0365229	0.112239	-0.155534	-0.133855	-0.00806031	-0.0631112	-0.0273592	-0.0166974	0.0046121	0.168643	-0.000175457	0.0244554	-0.021362	-0.078394	0.0109857	-0.0200175	-0.0517996	-0.358606
GSM773699	0.0517649	-0.241939	0.178418	-0.0150406	-0.0299186	-0.0334584	0.0640578	0.155553	-0.0897801	-0.0873594	0.0141149	-0.107083	-0.0455548	-0.168236	-0.0437488	0.148562	-0.0204061	0.0479211	-0.0433381	-0.00920799	0.0410571	0.0739195	-0.0753984	-0.274245
GSM773700	0.22562	-0.081467	0.209299	0.140808	0.0160259	0.000884322	0.0954538	0.0947469	-0.14347	-0.121213	-0.0159496	0.0227419	-0.0631711	-0.132414	0.179749	0.251673	0.0618208	0.104059	0.0406719	0.0222821	0.0688628	-0.156057	0.00195511	-0.187069
GSM773701	0.104883	-0.250209	0.156206	0.0671257	-0.0573663	-0.00562699	0.0606959	0.171578	-0.0553087	-0.0396465	-0.0262354	-0.0608387	-0.0418905	0.222988	0.0767467	0.211609	0.020954	0.102403	-0.0155917	0.108523	0.00671145	-0.113517	-0.0726728	-0.341909
GSM773702	0.109485	-0.232187	0.118739	-0.13139	0.0657544	-0.000637253	0.0168368	0.139215	-0.0900053	-0.0827568	-0.0107184	-0.0496041	-0.0309524	0.0310649	-0.095692	0.195834	0.000439201	0.0590304	-0.062821	-0.0485219	0.0232021	-0.0610321	-0.0463354	-0.327929
GSM773703	0.24556	-0.178711	0.105874	0.0454972	-0.165239	-0.0238376	0.0156394	0.032281	-0.178791	-0.073888	-0.11084	0.0186081	-0.0493137	0.159499	-0.00126646	0.223774	-0.00649584	0.0762659	0.0233868	-0.0633538	-0.0375692	-0.0115975	0.098217	-0.232793
GSM773704	0.0793952	-0.101247	0.158005	0.0695282	0.0645807	-0.0152415	0.082514	0.174062	-0.167536	-0.0735033	-0.0234534	-0.0716698	-0.0478551	0.0192214	0.093638	0.217349	0.0348158	0.0909903	-4.59e-05	0.0135602	-0.013447	0.0544003	-0.0342668	-0.19833
GSM773705	0.172274	-0.251254	0.172224	0.0648555	0.0143935	-0.0314627	0.0925119	0.187304	-0.00398223	-0.0166171	0.00388775	-0.0637322	-0.0626229	0.258519	0.078217	0.238512	-0.00244727	0.0720915	-0.0197057	0.0728583	0.0757382	-0.131702	-0.0851572	-0.287933
GSM773706	-0.0187165	-0.211531	0.172657	-0.146749	-0.0410354	-0.0265895	0.0544531	0.237557	-0.073626	-0.136023	-0.0541946	-0.160496	-0.0510045	-0.0460149	-0.160071	0.183378	0.0193667	0.0348228	-0.00737196	-0.0759994	-0.0160295	0.119788	-0.107631	-0.417532
GSM773707	0.156224	-0.218502	0.159757	-0.0230485	0.0927518	-0.00385142	0.127846	0.22132	-0.0522151	-0.0394567	0.017573	-0.0878228	-0.0554039	0.0728085	-0.0665571	0.141295	-0.0175917	0.0124244	-0.0146552	-0.0412772	0.0398886	0.0292948	-0.0670254	-0.470149
GSM773708	0.0301969	-0.16788	0.148313	-0.169324	-0.135327	-0.0184106	-0.0213897	0.0714112	-0.116744	-0.116766	-0.0935715	-0.107883	-0.0595227	-0.131055	-0.108017	0.158802	0.00122291	-0.013506	-0.0105949	-0.150695	-0.0602334	0.108489	-0.0305651	-0.22658
GSM773709	0.170111	-0.0856302	0.202616	0.167215	0.00673046	0.00876614	0.0957626	0.14591	-0.0592171	-0.12954	-0.0318585	-0.0314437	-0.0570731	0.323949	0.196679	0.255728	0.0759149	0.13238	0.0535033	0.0670404	0.0235205	-0.122018	0.0125911	-0.338317
GSM773710	0.181569	-0.180154	0.157749	-0.0729842	-0.0363682	0.0144495	0.0585234	0.192723	-0.059177	-0.0818708	-0.0145937	-0.0976964	-0.0738358	0.0185419	-0.0164365	0.195326	0.0621852	0.0432922	0.0163486	-0.0875996	0.0146776	-0.0742029	-0.11736	-0.216872
GSM773711	0.0917048	-0.158861	0.18845	0.0816809	0.00264712	-0.00522275	0.111224	0.261113	-0.0193975	-0.046558	-0.0718277	-0.0332172	-0.0316142	0.0539753	0.0972442	0.180255	-0.00136991	0.0766019	-0.0290528	0.0444232	0.073259	-0.0237188	-0.0731308	-0.466848
GSM773712	0.0451967	-0.238236	0.154432	-0.0745333	-0.219378	0.0503381	0.0478653	0.182824	-0.072612	-0.0795889	-0.00727628	-0.064463	-0.0580535	-0.0905737	-0.117751	0.191152	0.0222269	0.111409	0.025794	-0.120292	0.0212877	0.0134871	-0.065414	-0.383361
GSM773713	0.100914	-0.205405	0.17279	-0.0217032	-0.10852	-0.0318911	0.0557668	0.143147	-0.0542546	-0.103082	-0.12961	-0.0642693	-0.0418434	0.0255315	0.00166223	0.172148	-0.0539428	0.0738303	-0.0105754	-0.020431	-0.0160132	0.00387996	-0.0171779	-0.374818
GSM773714	0.0900529	-0.21903	0.144743	-0.124331	0.0479716	-0.0631261	0.0979041	0.189306	-0.101685	-0.0806631	-0.0546503	-0.0917269	-0.0448706	-0.216969	-0.1196	0.151158	-0.0023639	-0.00760564	-0.0149348	-0.159405	-0.00690892	-0.0693786	-0.0202981	-0.245898
GSM773715	0.224703	-0.238344	0.120145	-0.0867935	-0.0228403	0.0221961	0.094252	0.0902668	-0.097197	-0.0697423	0.0905961	-0.072852	-0.0902764	-0.343365	-0.122644	0.168601	-0.00155313	0.0833636	0.0175983	-0.1016	0.0295429	0.0542287	0.00937295	-0.277643
GSM773716	0.215406	-0.141895	0.098997	-0.0701973	0.101058	-0.0586116	0.154273	0.132391	-0.148756	-0.107196	-0.119335	-0.00374887	-0.0239396	0.0147558	0.0428795	0.230877	-0.0376882	0.0275163	-0.0527991	-0.0142352	0.0036387	-0.149537	0.0667438	-0.192117
GSM773717	0.202939	-0.0430122	0.175479	0.0626316	-0.077011	-0.0500528	0.0383502	0.0498389	-0.175587	-0.154203	0.0231947	0.0107768	-0.0836343	-0.114164	0.0888058	0.242797	0.0392645	0.0426756	0.0219222	-0.0517835	0.00818857	-0.0267263	-0.00913018	-0.253859
GSM773718	0.14818	-0.142135	0.21527	0.0800291	0.0413518	-0.00693959	0.142161	0.17804	-0.0289755	-0.119098	-0.0938515	-0.0908393	-0.0973534	0.0791185	0.149179	0.245529	0.0653217	0.0516982	0.0265983	0.013943	-0.00355639	0.0155076	-0.0317444	-0.392389
GSM773719	0.0316527	-0.2124	0.183637	-0.001837	-0.0210938	-0.027762	0.073385	0.158987	-0.0164971	-0.0682148	-0.0522944	-0.0850854	-0.042677	0.0601883	0.0051139	0.176294	0.00382558	0.0911379	0.00666094	0.0118757	-0.00238885	-0.0809895	-0.0632957	-0.152704
GSM773720	0.191548	-0.221529	0.159693	-0.0129063	-0.0471883	-0.000434762	0.0564707	0.130106	-0.0962976	-0.0518327	0.0250927	-0.0363623	-0.0160393	-0.0793127	-0.0341602	0.204858	-0.00823119	0.060447	-0.0205542	-0.0467665	0.075963	-0.0242489	-0.0661813	-0.12824
GSM773721	0.152663	-0.247662	0.157689	0.114911	0.131694	-0.0583336	0.112867	0.157777	-0.0305176	-0.0330306	-0.0590327	-0.0350928	-0.0511782	0.392195	0.0251935	0.198061	0.0253471	0.099659	-0.00843978	0.0655526	0.0429502	-0.0568319	-0.116003	-0.315795
GSM773722	0.0599738	-0.244715	0.144885	-0.0695495	0.0610868	-0.00591335	0.0777119	0.211305	-0.0522473	-0.1083	-0.0572748	-0.0543243	-0.0496715	-0.0287351	-0.0840194	0.189754	0.0170324	0.105887	0.0154566	-0.051915	-0.0233532	-0.0800141	-0.0912862	-0.345598
GSM773723	0.149696	-0.0617437	0.159349	0.0803188	0.0893284	-0.0685798	0.158206	0.307747	-0.110191	-0.0710086	-0.0227953	0.04532	-0.0184807	0.169498	0.136776	0.205549	-0.0238132	0.0290042	-0.0469788	0.0257353	0.0339397	-0.0634822	-0.00292992	-0.282303
GSM773724	0.166876	-0.117003	0.158008	0.0432078	0.00103899	-0.0306259	0.127254	0.233711	-0.0884218	-0.121049	-0.0849339	-0.010771	-0.0362461	-0.0382487	0.0703089	0.177078	-0.0424841	0.0349296	-0.00311426	-0.0157301	0.0445837	-0.125365	-0.0492466	-0.222891
GSM773725	0.16886	-0.174942	0.160747	0.0432827	0.0453795	-0.034542	0.0958926	0.169599	-0.098659	-0.113857	-0.0664389	0.01696	-0.0517794	0.115037	0.117615	0.224207	0.0476018	0.0682728	0.046136	0.00971498	0.0294021	-0.0469809	-0.025176	-0.367343
GSM773726	0.127633	-0.204579	0.129233	-0.0701011	-0.0144879	-0.0359684	0.08869	0.163189	-0.124576	-0.121875	-0.0253852	-0.02997	-0.0496324	-0.102806	-0.0062547	0.171735	0.0236406	0.0572081	-0.00449287	-0.0314326	0.0101463	-0.0250784	-0.099558	-0.306184
GSM773727	0.13884	-0.218823	0.139807	-0.0706086	-0.0376413	-0.0252908	0.0885437	0.219776	-0.0655699	-0.0520855	0.012753	-0.0943834	-0.0686609	-0.33987	-0.0843073	0.173762	0.0310876	0.0864432	-0.0548804	-0.0379405	-0.0117154	-0.096409	-0.057209	-0.321328
GSM773728	0.0474738	-0.183484	0.163234	-0.0977775	-0.0438488	-0.00599553	0.0866103	0.13266	-0.0673588	-0.124348	-0.145137	-0.0607131	-0.0528377	-0.130667	0.000400018	0.16649	0.026893	0.066821	0.0295125	0.00588604	-0.00893616	0.0134536	-0.0569466	-0.304048
GSM773729	0.206165	-0.172558	0.15656	-0.112451	0.0261023	-0.0240952	0.0747916	0.164719	-0.055616	-0.128206	-0.0974785	-0.0142826	-0.0324551	-0.0713523	-0.0226363	0.15218	-0.0234655	0.0227932	0.0279192	-0.031504	0.0360623	-0.204811	-0.0352052	-0.147461
GSM773730	0.137265	-0.179694	0.145851	-0.0538905	-0.0781425	-0.00617848	0.0578922	0.148314	-0.0840371	-0.0341756	-0.0626256	-0.00894341	-0.0461295	-0.0405786	-0.058881	0.218673	-0.00140676	0.0599624	-0.0324279	-0.0761652	0.0258634	-0.164866	-0.051076	-0.240947
GSM773731	0.159548	-0.243048	0.139214	0.0951048	0.00694913	-0.0137195	0.102043	0.114265	-0.0598759	-0.109688	-0.0691527	-0.0119348	-0.0568201	0.142899	0.0249058	0.245068	0.0170795	0.0804714	-0.0125188	0.0360405	-0.0245624	-0.0220119	-0.0391019	-0.285021
GSM773732	0.0141409	-0.212926	0.167624	-0.0966346	0.0017198	-0.0088773	0.0615663	0.094569	-0.0993265	-0.131111	-0.0177567	-0.0798985	-0.0752296	-0.0518396	-0.073115	0.185069	0.0362271	0.028737	-0.0324049	-0.0459271	0.0142705	0.0427697	-0.0694203	-0.400932
GSM773733	0.13215	-0.160493	0.201749	-0.0184828	-0.0298233	0.00597594	-0.0231058	0.0854572	-0.167084	-0.132943	-0.0542684	-0.0513472	-0.0575021	-0.0351422	-0.00175111	0.214965	0.0519631	0.0479694	0.00255593	0.00448177	0.0196002	-0.162259	-0.030168	-0.30696
GSM773734	0.197096	-0.198976	0.193833	0.232215	-0.0699297	-0.037606	0.0189885	0.0733753	-0.0571754	-0.0336605	-0.0386507	0.0360695	-0.0780624	0.036113	0.1199	0.228088	0.0616523	0.139306	-0.0209748	0.152667	0.0103814	-0.162169	-0.0645147	-0.285797
GSM773735	0.0573091	-0.181109	0.15498	-0.0771483	-0.0114612	-0.017719	0.0740464	0.187276	0.0486914	-0.0486424	-0.0206168	-0.0820909	-0.0583269	-0.0590234	-0.0876084	0.180102	0.000784491	0.0357962	-0.0224439	-0.103441	0.00683322	-0.00833942	-0.0525028	-0.139889
GSM773736	0.0721901	-0.218278	0.123369	-0.115319	0.12117	-0.00679064	0.14219	0.130772	-0.00381781	-0.0789958	0.00660224	-0.0468312	-0.0531957	-0.0914474	-0.0418471	0.187867	0.0211616	0.0799796	0.00029457	0.0246025	0.012333	0.0142866	-0.0567832	-0.172313
GSM773737	0.261347	-0.103742	0.1748	-0.0124877	-0.159373	0.00217036	0.0400931	0.165784	-0.137546	-0.0820045	-0.0110086	-0.0121121	-0.115619	0.1628	-9.58e-07	0.221033	0.0394083	0.0691917	0.0213884	-0.0855137	0.0217174	-0.0850536	0.00761368	-0.132414
GSM773738	0.0833769	-0.14719	0.143695	-0.132511	-0.0536713	0.00955349	0.0077221	0.0358723	-0.162511	-0.171572	0.00180247	-0.0878791	-0.063864	-0.105038	-0.122818	0.207439	0.0436405	0.0443246	0.010082	-0.0846338	-0.0850099	-0.113462	-0.0707636	-0.393748
GSM773739	0.121851	-0.163706	0.159119	-0.0806376	-0.0581029	0.00516388	0.00659932	0.146979	-0.0234595	-0.0850999	-0.0144349	-0.112826	-0.098025	0.0693137	-0.051619	0.256021	0.0587872	0.0764571	0.0341688	0.00548262	0.00927676	0.00624585	-0.13413	-0.281526
GSM773740	-0.0194336	-0.192029	0.143846	-0.0631253	-0.0713585	-0.01057	0.0312296	0.133663	-0.166504	-0.169527	-0.110337	-0.0538168	-0.06232	-0.204543	-0.0392177	0.208893	0.0179513	0.0355163	0.00291369	-0.113433	0.00422899	-0.0214833	-0.0480425	-0.258907
GSM773741	-0.0168568	-0.22689	0.134067	-0.119999	-0.0665214	-0.0282838	0.0307401	0.059565	-0.104391	-0.186688	-0.0811416	-0.0203026	-0.0286602	-0.0967867	-0.0281522	0.190478	0.0162425	0.0503662	-0.00945574	-0.0393212	-0.0559377	-0.0264235	-0.0880727	-0.310844
GSM773742	0.162417	-0.20724	0.0708729	-0.181691	-0.129831	0.00453735	0.0105086	0.0862527	-0.114589	-0.0720906	-0.126887	-0.018138	-0.1156	-0.131444	-0.134155	0.194464	-0.018715	0.0334553	0.0109225	-0.124041	-0.00951195	-0.0269857	0.0109192	-0.217066
GSM773743	0.00969782	-0.174517	0.146632	-0.100773	0.0786597	-0.036445	0.11011	0.107304	-0.0474657	-0.109386	-0.0155259	-0.0835578	-0.0609683	-0.0166003	-0.0529649	0.214492	0.0113603	0.0526491	0.0134716	-0.062473	-0.0222847	-0.0406078	-0.0596182	-0.273566
GSM773744	0.146891	-0.152117	0.154208	-0.0898302	0.0139877	-0.00495591	0.0651002	0.150615	-0.0690338	-0.133913	-0.0763481	-0.0705636	-0.0599526	-0.102903	-0.0711299	0.198229	0.0383881	0.0476558	0.0265963	-0.0471437	-0.0125303	0.00425925	-0.10153	-0.38006
GSM773745	0.121373	-0.241654	0.157309	-0.0346087	-0.130592	-0.0447679	0.0603627	0.244143	-0.138938	-0.0828062	-0.0642697	-0.0592917	-0.0985292	0.221726	-0.0043435	0.186411	-0.0149591	0.0246375	0.00603167	-0.0537278	0.00107465	-0.0781164	-0.021121	-0.452286
GSM773746	0.19838	-0.0991098	0.18894	0.0486529	-0.0144442	-0.0386489	0.137879	0.195251	-0.0794315	-0.028705	-0.0815624	0.0211232	-0.0809762	0.0735851	0.0265597	0.207736	0.00733053	0.0320974	0.00847089	-0.00358195	0.0386008	-0.0179033	-0.0400509	-0.190079
GSM773747	-0.0142136	-0.195938	0.159409	-0.0993973	-0.0682019	0.0909794	-0.0162924	0.0566979	-0.0454679	-0.127413	0.0185313	-0.0771036	-0.0668984	-0.395884	-0.111739	0.149161	0.00597557	0.0143583	0.0137608	-0.089216	0.000685683	0.0593131	-0.0475566	-0.260557
GSM773748	-0.00964653	-0.118188	0.149232	-0.039975	0.111933	-0.054782	0.130282	0.158403	0.0148126	-0.144272	-0.0756855	-0.108771	-0.0599576	-0.0595088	0.0878658	0.213962	0.0838453	0.115829	0.0415579	0.0431302	-0.00233024	0.0554042	-0.0406371	-0.345889
GSM773749	0.133697	-0.148598	0.112903	-0.0536686	-0.0802366	-0.0539115	0.116665	0.212571	-0.113166	-0.111088	-0.100874	-0.0294667	-0.0449657	-0.041064	-0.0175148	0.175047	-0.0196323	0.0201674	-0.050289	-0.0340759	-0.00334041	-0.114112	-7.21e-05	-0.319775
GSM773750	0.171137	-0.210692	0.182734	-0.0347643	0.0870751	0.0271691	0.117587	0.224509	0.0464682	-0.066616	-0.0704407	-0.0535663	-0.0687891	0.0761091	-0.0126668	0.177623	0.00771315	0.0595456	-0.0314966	-0.00872501	0.0381006	-0.00954327	-0.0574829	-0.211145
GSM773751	0.122039	-0.160551	0.134145	-0.0648491	-0.0615832	-0.034818	0.0487377	0.071743	-0.0436988	-0.0769777	0.0042064	-0.0507001	-0.0413022	-0.413164	0.00199083	0.17118	0.00829423	0.021314	0.0244452	-0.056986	-0.0161315	-0.000304404	-0.0135736	-0.245801
GSM773752	-0.0302517	-0.208789	0.125907	-0.0750223	-0.00431394	-0.00584123	-0.0143315	0.110403	-0.0429435	-0.146388	-0.0958568	-0.0977225	-0.0595924	-0.470149	-0.1111	0.170254	0.0242927	0.0198672	0.0254812	-0.128155	-0.0118532	0.0846197	-0.107098	-0.201048
GSM773753	0.191094	-0.157704	0.172191	0.0327812	0.010967	0.0154805	0.113865	0.11658	-0.0697092	-0.09664	-0.0790675	-0.0117348	-0.0819401	-0.247452	0.0696971	0.194173	0.016242	0.082723	0.0456162	0.0153263	0.0240516	-0.152089	-0.0483524	-0.361712
GSM773754	0.158828	-0.108887	0.187118	0.0624779	0.0650095	-0.00705325	0.0694091	0.122268	-0.164128	-0.0772506	-0.0416589	-0.0626032	-0.0777497	-0.0730026	0.076049	0.229625	0.0504112	0.0704845	-0.00118157	-0.00228324	-0.0176613	0.0873194	-0.0240962	-0.170469
GSM773755	0.0116105	-0.210037	0.126098	-0.0620572	-0.091598	9.48e-05	0.0360752	0.112288	-0.133323	-0.188719	-0.040364	-0.106423	-0.0623769	-0.454616	-0.0988586	0.208928	0.0182438	0.0253615	-0.0115426	-0.102859	0.0407353	-0.0383128	-0.0553318	-0.268129
GSM773756	0.252513	0.0538399	0.174221	0.0914206	-0.0339453	-0.0437751	0.0841369	0.159689	-0.149893	-0.143145	-0.0631673	0.0386554	-0.0839795	0.166197	0.196326	0.251392	0.0528133	0.0755148	0.015941	0.0319311	0.0606022	-0.148046	-0.00448565	-0.410057
GSM773757	0.123491	-0.167177	0.157945	-0.0894938	-0.0876181	-0.00414842	0.0689799	0.134235	-0.0129615	-0.0865109	-0.0717426	-0.0597169	-0.0799788	-0.152412	-0.0447832	0.186998	0.0276192	0.0307566	0.00794386	-0.0470978	0.0005191	-0.111814	-0.0582386	-0.453063
GSM773758	0.0173746	-0.0645792	0.21888	0.0108322	-0.0323908	0.0467077	0.055762	0.137807	-0.0898141	-0.0975852	-0.105218	-0.119254	-0.053335	-0.10931	0.0780398	0.208807	0.0446501	0.0611056	0.0332143	-0.0257724	-0.000139366	-0.201458	-0.149343	-0.270653
GSM773759	0.0133406	-0.209913	0.139743	-0.129659	-0.0369485	-0.0249815	0.0107978	0.147205	-0.00538716	-0.154882	-0.118609	-0.0873264	-0.0486513	-0.452772	-0.139804	0.156674	0.028195	0.0120652	0.0218251	-0.0473843	-0.0181656	-0.0366657	-0.11366	-0.325697
GSM773760	0.0122063	-0.190134	0.198803	0.0244652	0.137282	-0.00368506	0.134164	0.17067	-0.0815795	-0.10916	-0.0254847	-0.0178851	-0.0622691	-0.152121	-0.00407993	0.200203	0.0711163	0.0987732	0.0101917	0.0119648	-0.015332	-0.00458507	-0.0732208	-0.209009
GSM773761	-0.02823	-0.123878	0.172858	-0.00787961	0.111245	-0.0478004	0.143604	0.171372	0.000427554	-0.0712885	-0.0699001	-0.0229473	-0.0603458	0.109116	0.0590249	0.215202	0.0146611	0.0669482	-0.0069907	0.0567405	0.0465194	-0.0697661	-0.0461317	-0.37773
GSM773762	0.157461	-0.167712	0.188228	-0.108896	-0.0465916	-0.051785	0.0180416	0.0969299	-0.0880429	-0.128234	-0.0474849	-0.0787967	-0.0499449	0.069702	-0.0543866	0.176698	-0.0232741	0.0339525	0.0270133	-0.0432532	0.0391296	-0.0392525	-0.0869371	-0.298903
GSM773763	0.0619177	-0.264169	0.193347	0.104986	0.0270478	0.00730679	0.122186	0.121671	-0.0283022	-0.021786	-0.0498811	-0.0303007	-0.0546793	0.0974663	-0.0298565	0.180981	-0.0341394	0.0573683	-0.0516007	0.0495908	0.0343404	-0.0910037	-0.0425237	-0.256771
GSM773764	0.227446	-0.0719317	0.163251	0.0561658	-0.0196341	-0.0358979	0.0544111	0.0968378	-0.156063	-0.124024	-0.0867129	0.0184692	-0.0627396	0.0228133	0.0487473	0.196558	0.0191769	0.0433129	-0.00095449	-0.0195013	0.0251084	-0.175042	-0.061334	-0.212115
GSM773765	-0.000823977	-0.142803	0.187256	-0.0143362	0.18149	0.0100523	0.0527447	0.156202	-0.0236347	-0.0885569	-0.0227558	-0.0904305	-0.0849743	-0.0166974	0.0814859	0.193293	0.0311118	0.0429944	0.0364816	-0.000385264	0.0221776	0.0387497	-0.0529644	-0.37608
TCGA-05-4249	0.136081	-0.165741	0.158189	-0.072423	0.0744436	-0.0204114	0.124277	0.163867	0.0440238	-0.0511554	-0.094903	-0.0135207	-0.0712135	-0.533735	-0.0306463	0.192978	0.0371706	0.0705671	0.0281557	-0.0151902	-0.00823007	0.0478858	-0.0871047	-0.264246
TCGA-05-4250	0.194923	-0.245572	0.178031	0.0608493	-0.033102	-0.0300167	0.0491007	0.182494	-0.101176	-0.0581508	0.0334131	0.0196113	-0.0559018	-0.533735	0.0640157	0.18664	-0.0443441	0.0639064	-0.0225922	-0.0129133	0.0696666	-0.0573028	-0.0163599	-0.330356
TCGA-05-4382	-5.11e-05	-0.1574	0.13296	-0.0607966	0.00967058	-0.0188131	0.0989071	0.282765	-0.119309	-0.00946129	-0.125209	-0.0189706	-0.0383223	-0.533735	-0.0449962	0.166085	-0.0310466	0.0581734	-0.0540381	-0.00435654	-0.010469	0.00278925	-0.00704639	-0.216872
TCGA-05-4384	0.0929763	-0.233868	0.176496	-0.0339627	-0.0668372	-0.0143596	0.102704	0.214797	-0.0354366	-0.0448648	-0.0584252	-0.0815669	-0.0723828	-0.533735	-0.0942807	0.220355	0.0248911	0.0860472	-0.0463638	-0.0145014	-0.000396182	0.076196	-0.0790186	-0.358994
TCGA-05-4389	0.205952	-0.182666	0.164936	0.134489	0.140334	0.0163128	0.169436	0.175581	-0.00404471	-0.0718442	-0.0944318	-0.0548171	-0.0600073	-0.533735	0.106081	0.195547	-0.047621	0.0230229	-0.0331155	-0.0416109	-0.0089695	-0.00302027	0.0072534	-0.203767
TCGA-05-4390	0.0256446	-0.220518	0.15079	-0.0694279	-0.0955548	-0.07111	0.028978	0.146368	-0.116568	-0.0501409	-0.0289038	-0.0198967	-0.071745	-0.533735	-0.122432	0.160411	-0.0415815	0.0435564	-0.0460719	-0.0348262	-0.0321035	-0.111378	0.0308132	-0.331521
TCGA-05-4396	0.0713128	-0.246833	0.114061	-0.149729	-0.141365	-0.0200998	-0.00562365	0.0499534	-0.0778272	-0.130863	-0.0243984	-0.122218	-0.0705308	-0.533735	-0.0964297	0.18677	0.0421489	0.0470824	-0.0313306	0.0320473	-0.0713651	0.011217	-0.0289399	-0.317057
TCGA-05-4397	0.260843	-0.243787	0.125058	-0.0800598	-0.0502525	-0.0783878	0.0534827	0.128453	-0.121102	-0.0503324	-0.089161	-0.125781	-0.0910248	-0.533735	-0.136552	0.191852	-0.0156029	0.0241026	-0.0349707	-0.024538	-0.0251218	-0.167677	0.0645638	-0.302398
TCGA-05-4398	0.134352	-0.152397	0.114997	-0.0330028	0.0321377	-0.0526294	0.11613	0.186244	-0.149137	-0.0655234	-0.131886	0.013502	-0.0526908	-0.533735	-0.0366435	0.177484	-0.022734	0.0634637	-0.00297468	-0.041004	0.0668879	0.0526192	-0.0363278	-0.261431
TCGA-05-4402	0.195476	-0.175043	0.11494	-0.111165	-0.0497374	-0.0399294	0.0928576	0.217982	-0.0945737	-0.0982733	-0.0393162	-0.0775936	-0.059533	-0.533735	-0.0704397	0.174815	-0.0385859	0.0235505	-0.0392819	-0.0232696	-0.0272396	-0.0348562	-0.031908	-0.307737
TCGA-05-4403	0.102243	-0.21616	0.154077	-0.0458146	0.0385783	0.0130144	0.135776	0.247343	-0.0581217	-0.0448089	0.0575532	-0.0475466	-0.0613895	-0.533735	0.0136485	0.177337	-0.0845918	0.0214928	-0.0564044	-0.00631654	0.00512903	-0.0772251	-0.0471568	-0.346374
TCGA-05-4405	0.062305	-0.174755	0.173347	-0.0521834	-0.120444	-0.0135246	0.0608731	0.16881	-0.09234	-0.0625284	-0.14322	-0.0439831	-0.0407617	-0.533735	-0.0960254	0.169343	-0.010965	0.0492662	0.00336929	0.01427	0.0237296	-0.0592155	-0.0494028	-0.36579
TCGA-05-4415	0.197844	-0.226096	0.116317	-0.0469385	-0.163401	-0.0155145	-0.0135674	0.0756999	-0.164194	-0.0903356	-0.0330698	0.0380231	-0.0429336	-0.533735	-0.0720034	0.193403	0.021885	0.0702965	-0.137337	0.00798148	0.0160605	-0.221345	0.0744394	-0.317057
TCGA-05-4417	0.157103	-0.135171	0.16081	0.0521798	0.155005	-0.0159513	0.102224	0.202876	-0.0468333	-0.0196496	-0.0354808	0.0578644	-0.0496942	-0.533735	0.118778	0.198401	-0.00823303	0.0744774	-0.00285532	0.0171136	0.0729309	-0.0601554	-0.0170677	-0.158043
TCGA-05-4418	0.194459	-0.13631	0.159957	0.0350145	-0.0282199	-0.0223381	0.0572678	0.157059	-0.102693	-0.0832983	0.0188343	0.00429552	-0.0876039	-0.533735	0.0567856	0.184081	-0.0234255	-0.00439795	-0.0547487	-0.0127459	0.00275243	-0.0192805	-0.0403516	-0.195515
TCGA-05-4420	-0.0283122	-0.206572	0.135356	-0.143095	-0.182124	-0.0673759	0.0132691	0.104936	-0.132538	0.0200266	-0.0402592	-0.128707	-0.0670906	-0.533735	-0.154897	0.134842	-0.0613957	0.0311434	-0.0385168	0.0324957	-0.0972779	-0.178903	0.0449734	-0.427337
TCGA-05-4422	0.0871936	-0.0866746	0.160977	0.113824	-0.158571	-0.0405948	0.0189108	0.130832	-0.132315	-0.150867	-0.00214224	-0.0611692	-0.100902	-0.533735	0.0914573	0.203705	0.037233	0.0588387	-0.0475348	-0.0214126	0.0133545	0.0477172	-0.0512194	-0.268809
TCGA-05-4424	0.192323	-0.232796	0.147461	-0.0429456	-0.0726885	-0.0232423	0.110779	0.23014	-0.0576527	0.00530064	-0.0479232	-0.0699044	-0.0575694	-0.533735	0.00579477	0.184027	-0.0289664	0.0836607	-0.0471163	0.0323461	-0.0213789	-0.0858335	0.00333911	-0.280458
TCGA-05-4425	0.15924	-0.238484	0.130038	-0.00544202	-0.0350664	-0.0277683	0.134619	0.22291	-0.107645	-0.0624558	-0.0815966	0.017886	-0.0235351	-0.533735	0.0556317	0.177727	-0.0321894	0.0172678	-0.00027861	-0.0053733	-0.0152065	-0.113644	-0.0375725	-0.229978
TCGA-05-4426	0.0188986	-0.223131	0.122741	-0.103153	-0.094806	-0.0428659	0.0699534	0.192672	-0.121598	-0.0289038	-0.0292335	-0.0950083	-0.000684255	-0.533735	-0.0542126	0.189133	0.0152764	0.00792899	-0.0665652	-0.0297655	-0.00117574	-0.0309708	-0.0381516	-0.282497
TCGA-05-4427	0.111839	-0.220406	0.15167	-0.0829329	-0.0449964	-0.0304641	0.0529592	0.190909	-0.168673	-0.117169	-0.0556809	-0.0604066	-0.0262177	-0.533735	-0.0665407	0.209556	0.0134767	0.08882	-0.0279274	0.033157	0.007037	-0.00971614	-0.0329666	-0.289486
TCGA-05-4430	0.156941	-0.187298	0.15678	0.00384855	0.0822183	-0.0203029	0.163111	0.202605	-0.0503139	-0.00462485	-0.0176147	0.0100978	-0.0188647	-0.533735	-0.0111221	0.161881	-0.044092	0.040642	-0.000280333	0.0503872	0.0152686	-0.0678917	-0.0527458	-0.269294
TCGA-05-4432	0.183473	-0.157416	0.148497	0.0170732	-0.105126	-0.0275184	0.063232	0.172544	-0.0734519	-0.0527581	-0.0200719	-0.00384895	-0.0497495	-0.533735	-0.0170717	0.169842	-0.0295841	0.0525117	-0.0315416	-0.0049983	-0.0015636	0.0564864	-0.0521678	-0.282303
TCGA-05-4433	0.222504	-0.209431	0.146831	-0.0243691	-0.0406077	-0.0086247	0.10896	0.262604	-0.0733962	-0.0444028	0.0632058	-0.0900221	-0.05865	-0.533735	0.0206386	0.199938	-0.00595205	0.0420708	-0.0684502	-0.0149368	0.0089193	0.00610651	-0.0401491	-0.294632
TCGA-05-4434	0.232362	-0.12605	0.144169	0.0326487	0.0612793	-0.0435424	0.124405	0.221699	-0.0389478	-0.0330094	0.0175161	0.0155081	-0.0543865	-0.533735	0.062087	0.180538	0.00100164	0.066569	-0.030024	-0.0237192	0.0329332	-0.124361	0.000202698	-0.24949
TCGA-05-5420	0.257489	-0.0322065	0.162226	0.176991	0.118362	-0.0285072	0.0913726	0.231706	-0.0758433	0.00352818	-0.110508	-0.0310175	-0.12473	-0.533735	0.19642	0.214006	-0.012583	0.0169725	-0.0501341	0.00377472	0.0456051	-0.170609	0.00638009	-0.213377
TCGA-05-5423	0.165154	-0.133948	0.164307	0.0280345	0.164292	0.0191301	0.197613	0.250331	-0.0176823	-0.0208692	-0.0790041	-0.0583446	-0.0933475	-0.533735	0.0838017	0.197806	-0.00072552	0.0147431	-0.00337083	-0.0179717	0.0492384	-0.13913	-0.0582657	-0.211921
TCGA-05-5425	0.227603	-0.175037	0.15873	0.0990218	0.00254253	-0.0316589	0.105463	0.203197	-0.108177	0.001252	0.00212408	-0.0118732	-0.101945	-0.533735	0.0970132	0.186546	-0.0492435	0.0240981	-0.0208431	0.0116692	0.042607	-0.0265059	-0.0565119	-0.238132
TCGA-05-5428	-0.0823981	-0.227105	0.135675	-0.0315798	-0.0538027	-0.0245988	0.118607	0.210959	-0.0383661	-0.0785455	-0.166512	-0.12717	-0.0997861	-0.533735	-0.0775761	0.204501	-0.0515852	-0.0238106	-0.0345827	0.00808881	-0.0232295	-0.0647634	0.00977289	-0.407436
TCGA-05-5429	-0.100644	-0.232819	0.131429	-0.134826	-0.0885038	0.0026322	0.0228918	0.0452359	-0.0570781	-0.1269	0.0375283	-0.0504178	-0.057685	-0.533735	-0.102477	0.145792	-0.0603927	-0.034528	-0.108984	-0.00286433	-0.0187828	-0.184815	-0.011524	-0.417241
TCGA-05-5715	0.131616	-0.192888	0.128631	-0.145863	-0.0537026	-0.0383004	0.116171	0.21526	-0.044484	-0.0628806	-0.157782	-0.06806	-0.0417651	-0.533735	-0.0616295	0.167893	-0.0422615	0.00997861	-0.00575276	-0.0719298	-0.0212774	-0.0187704	-0.0478547	-0.398796
TCGA-35-3615	0.0275046	-0.208807	0.158501	-0.0837982	0.0141815	-0.0321704	0.0751442	0.142553	-0.0447871	-0.109213	-0.105906	-0.0599516	-0.0862984	-0.533735	-0.058696	0.16678	0.0103923	0.00446292	-0.0310832	-0.00946757	-0.0359336	0.0339652	-0.0405868	-0.322881
TCGA-35-4122	0.182228	-0.106905	0.163949	0.1378	0.0562908	-0.0238984	0.152869	0.280566	-0.0790443	0.00120747	-0.0976106	-0.00900567	-0.0448354	-0.533735	0.125925	0.18491	-0.0798078	-0.00016622	-0.00560318	0.031417	0.0770617	-0.137607	0.00194023	-0.322784
TCGA-35-4123	0.132326	-0.194571	0.17506	0.181795	0.0704763	-0.0400073	0.0819099	0.19849	-0.106905	-0.0918833	-0.102597	-0.00210536	-0.052395	-0.533735	0.201052	0.219752	-0.0568794	0.015044	-0.0277127	-0.0294072	0.15752	-0.0822536	0.00370937	-0.233375
TCGA-35-5375	0.0795654	-0.137695	0.128601	0.019314	-0.0890334	-0.0314858	0.0801692	0.118583	-0.170587	-0.053286	-0.100316	-0.11612	-0.0427843	-0.533735	0.0417384	0.202276	-0.0552931	-0.0472064	-0.0339639	-0.0065583	-0.0439887	-0.311135	0.038374	-0.285118
TCGA-38-4625	0.200513	-0.159439	0.128994	-0.0329825	-0.0891864	-0.0628828	0.0430526	0.141405	-0.112481	-0.030942	-0.054999	-0.00902516	-0.0569688	-0.533735	-0.027958	0.177378	-0.0463059	0.0268152	-0.0702548	0.00161379	0.0111474	-0.16379	0.00294816	-0.299194
TCGA-38-4626	0.173337	-0.230923	0.152095	-0.0469218	0.109707	-0.0102579	0.134463	0.291984	-0.0432899	0.163607	-0.0781557	-0.049045	-0.0555287	-0.533735	-0.0732644	0.161612	-0.0206209	0.0923557	-0.0349302	0.0112542	0.0460001	-0.0898904	-0.0581681	-0.325405
TCGA-38-4627	0.149227	-0.195371	0.129482	-0.00364077	-0.00246385	-0.0174739	0.132874	0.251846	0.0164196	-0.002727	-0.130553	-0.0164415	0.0124723	-0.533735	0.0117821	0.177795	-0.0534976	0.0527627	-0.0454351	0.107875	0.0366962	-0.201661	-0.0190503	-0.357926
TCGA-38-4628	-0.0260231	-0.222532	0.1574	-0.101983	0.0333686	-0.0270249	0.12185	0.237686	-0.0929482	-0.0848868	-0.0941241	-0.126685	-0.0558344	-0.533735	-0.0921567	0.156586	-0.0752481	-0.000835912	0.00389523	-0.0168341	-0.00369894	-0.0417516	-0.0755995	-0.361324
TCGA-38-4629	0.157209	-0.195831	0.16353	0.0511141	0.0151117	-0.055241	0.118634	0.255722	-0.129495	-0.0267838	-0.0963432	0.0181148	-0.0274239	-0.533735	0.0285996	0.156082	-0.0646494	0.0449589	-0.0554057	0.0319843	0.0717414	-0.190084	0.0169048	-0.259101
TCGA-38-4630	0.119489	-0.153989	0.138936	-0.126702	-0.0337221	-0.0736542	0.0328229	0.0892512	-0.2144	-0.172487	-0.069131	-0.126334	-0.020865	-0.533735	-0.112151	0.193365	-0.0250127	0.0718472	-0.136248	-0.0194054	-0.0431699	-0.177243	0.0133875	-0.249879
TCGA-38-4631	0.0678467	-0.196287	0.140254	-0.0589574	-0.147034	-0.0383865	-0.00105613	0.101991	-0.140741	-0.019951	-0.124647	-0.0290413	-0.0795504	-0.533735	-0.0745451	0.171536	-0.0812604	-0.0056532	-0.0855333	-0.0269659	-0.0351198	-0.290568	-0.032632	-0.36812
TCGA-38-4632	0.0658489	-0.190199	0.150382	-0.061139	0.103288	0.00841868	0.138172	0.222907	-0.0339866	-0.0361383	-0.0598464	0.0114022	-0.0741187	-0.533735	0.0376203	0.165117	-0.0654632	0.0188541	-0.0130298	-0.0191959	0.0896677	-0.117072	0.0168858	-0.229201
TCGA-38-6178	0.21828	-0.196439	0.161559	-0.0501872	-0.0977136	0.00898597	0.0324106	0.132665	-0.060612	-0.054792	-0.0534261	-0.0624498	-0.0291121	-0.533735	-0.0922701	0.184746	0.0248114	0.0111814	0.00775742	-0.0743386	-0.00935441	-0.191296	-0.0704712	-0.33589
TCGA-38-7271	0.204049	0.0942481	0.226873	0.219004	0.0955869	-0.0118491	0.154777	0.199686	0.0116459	-0.0372601	-0.0382003	0.0294425	-0.0367809	-0.533735	0.266926	0.18486	0.0234889	0.065403	0.0823828	0.00519229	0.0583034	-0.0819269	-0.0360907	-0.157072
TCGA-38-A44F	0.171905	-0.0274679	0.151222	0.0814268	0.0410273	-0.012758	0.155946	0.193092	-0.00553077	-0.0362079	0.0976429	-0.0135918	-0.0248804	-0.533735	0.0881404	0.192233	0.00891039	0.0309353	-0.0125073	-0.0379111	0.0464474	-0.0808415	-0.0675103	-0.287254
TCGA-44-2655	0.0806658	-0.124855	0.140161	-0.037817	-0.0241701	-0.0133173	0.154171	0.150733	-0.0335401	-0.0709258	-0.029738	-0.0855976	-0.0657273	-0.533735	0.00573286	0.212328	-0.0197735	0.0713945	-0.0199529	0.00891007	0.012732	-0.045905	-0.0679277	-0.309387
TCGA-44-2656	0.246949	-0.114169	0.183216	0.118733	-0.0536488	0.0242129	0.087986	0.231984	-0.0512502	-0.0820792	-0.117222	-0.0338805	-0.0881281	-0.533735	0.145706	0.238884	0.122276	0.0904712	-0.0238666	0.0840642	0.0444651	-0.159926	-0.00129013	-0.366663
TCGA-44-2657	0.18895	0.102745	0.185314	0.17253	0.0877725	-0.019188	0.123168	0.216081	0.015818	-0.0612258	-0.0713342	0.0116701	-0.0549837	-0.533735	0.21356	0.222196	0.0146575	0.0714981	0.042224	-0.0641047	0.0619781	-0.0839781	-0.0693889	-0.257839
TCGA-44-2659	0.126524	-0.138646	0.156076	0.0315475	-0.00605497	-0.011415	0.0637196	0.173602	-0.0390258	-0.0785448	-0.103093	-0.0541446	-0.0448551	-0.533735	0.115911	0.183982	0.0323168	0.0719286	0.0177311	-0.000667176	0.0160794	-0.0438411	-0.0874419	-0.253276
TCGA-44-2661	0.158916	-0.0353397	0.177206	0.105099	0.127276	0.0110694	0.209134	0.265113	0.0939656	-0.0100403	-0.101094	-0.037913	-0.0764084	-0.533735	0.180941	0.209428	-0.00282724	0.0634476	0.00271756	-0.00883746	0.0679154	-0.0710324	-0.0372026	-0.155228
TCGA-44-2662	-0.0256477	-0.218473	0.136922	-0.117122	-0.0542545	-0.00893391	0.0524727	0.250284	-0.0930303	0.0534287	-0.107228	-0.0870314	-0.0580203	-0.533735	-0.141717	0.190538	0.0791666	0.0638169	-0.0590229	-0.0218124	0.0707036	-0.127708	0.0549547	-0.353849
TCGA-44-2665	0.149629	-0.200199	0.167079	-0.0688255	0.0416569	0.00727996	0.0718632	0.234765	-0.0343743	-0.0232103	-0.20064	-0.0933715	-0.0295133	-0.533735	-0.0327976	0.21226	0.0810287	0.0891841	-0.00628092	0.0475239	0.0576535	-0.125655	0.00345517	-0.269197
TCGA-44-2666	0.183185	-0.191268	0.163753	-0.116765	-0.096482	0.0375983	0.0348584	0.096173	0.0681098	-0.124168	-0.0791317	-0.10699	-0.0395485	-0.533735	-0.0724093	0.207939	0.111661	0.044158	-0.0311551	0.00501757	0.0327125	-0.0579462	-0.0104636	-0.443258
TCGA-44-2668	0.250893	-0.204269	0.178005	0.0817745	0.0162947	-0.0112258	0.0182335	0.198509	-0.143212	0.113493	-0.126839	0.013091	-0.0549927	-0.533735	0.0418196	0.223964	0.0692403	0.133194	-0.0597748	0.0551943	0.103425	-0.113268	0.0251554	-0.315212
TCGA-44-3396	0.210997	-0.122521	0.166158	0.0178271	0.0568856	-0.0507282	0.0801449	0.22598	-0.111706	0.0646807	-0.0310415	-0.0180116	-0.0425383	-0.533735	0.0390333	0.184969	-0.0330219	0.0749133	-0.0296931	0.0177209	0.04057	-0.127353	-0.0288278	-0.201534
TCGA-44-3398	0.148542	-0.131266	0.149857	0.0836074	0.142644	0.0523833	0.179417	0.258781	-0.0195226	-0.0181627	-0.181944	-0.0153495	-0.0497871	-0.533735	0.0507885	0.177858	-0.0258559	0.0290403	0.00723109	0.0205925	0.0502464	-0.174047	-0.00965426	-0.30764
TCGA-44-3917	0.0231922	-0.093052	0.111779	-0.0621133	-0.26849	0.0195153	-0.031774	0.113153	-0.156346	-0.099743	-0.0521697	-0.125481	-0.076054	-0.533735	-0.000744509	0.228986	0.10837	0.098116	0.00805881	0.108694	0.0226636	-0.203523	0.0983688	-0.391321
TCGA-44-3918	0.205164	-0.119301	0.175735	0.116671	-0.104233	-0.0144091	-0.0135752	0.209604	-0.0839245	-0.0895555	-0.131696	-0.0251485	-0.0702114	-0.533735	0.153464	0.244021	0.0819479	0.0707801	0.00132995	0.0810016	0.0923791	-0.133561	0.00897026	-0.358509
TCGA-44-3919	0.252022	-0.10828	0.143734	0.0120522	0.0119988	-0.0327522	0.130396	0.208411	-0.0498034	-0.0535664	-0.0262033	-0.0340293	-0.0491243	-0.533735	0.0675999	0.200972	-0.00319403	0.0630376	0.00654316	-0.0482306	0.0153894	-0.0608425	-0.0410859	-0.223765
TCGA-44-4112	0.134593	-0.175617	0.1959	-0.0267947	-0.125487	-0.00845457	-0.00951379	0.161583	-0.0473486	-0.0867556	-0.206863	-0.0456059	-0.0476382	-0.533735	-0.0434765	0.18961	0.0695288	0.047819	-0.05971	0.0412195	0.0671226	-0.159306	0.00754323	-0.407436
TCGA-44-5643	0.177596	-0.135929	0.180866	0.0445167	-0.0819843	-0.0764239	0.0162378	0.0659589	-0.190583	-0.173184	-0.0808207	-0.0269621	-0.0821516	-0.533735	0.0446927	0.20109	0.0367268	0.0399521	-0.0475643	0.0390222	-0.0360074	-0.247995	0.0449258	-0.177944
TCGA-44-5644	0.0432835	-0.197641	0.128936	-0.100082	-0.226788	-0.0110875	-0.0476002	0.00167953	-0.076667	-0.138084	0.0799014	-0.0593418	-0.0252899	-0.533735	-0.121166	0.211408	-0.0177476	0.00437579	0.0143725	-0.0371881	-0.0729033	-0.0798811	-0.0289005	-0.39103
TCGA-44-5645	0.0795191	-0.078941	0.150681	-0.0529458	0.0310835	0.0234432	0.10174	0.167142	-0.0110011	-0.0965626	-0.00407447	-0.0784316	-0.0499274	-0.533735	0.117433	0.241702	0.164374	0.0740433	0.00735503	0.103002	0.00194759	-0.117772	-0.0432247	-0.27376
TCGA-44-6145	0.211745	-0.0667638	0.158997	0.130853	-0.0179274	-0.0239723	0.034991	0.164255	-0.0619685	0.00344995	-0.0774036	0.0436751	-0.051395	-0.533735	0.115614	0.219649	0.00236096	0.035181	-0.0251835	0.0109509	0.0334703	-0.00033424	-0.00253796	-0.262208
TCGA-44-6146	0.0876351	-0.239119	0.156191	-0.112871	-0.138032	0.0354421	-0.00849209	0.0771145	-0.0892865	-0.10884	-0.00262992	-0.063038	-0.045481	-0.533735	-0.0913735	0.222103	0.10749	0.0623323	-0.0728469	0.0422534	-0.0507557	-0.0857974	0.0043919	-0.462091
TCGA-44-6147	0.164494	-0.0610224	0.193225	-0.00883677	-0.119408	0.00652039	-0.0167522	0.15603	-0.0264953	-0.0594158	-0.0699378	-0.108431	-0.0462678	-0.533735	0.0469241	0.212574	0.130205	0.0743708	-0.013608	0.0785922	0.0321479	-0.153449	-0.0419781	-0.385594
TCGA-44-6148	0.0299051	-0.171574	0.15756	-0.066916	-0.0327716	0.0125101	0.0807405	0.13446	0.0582874	-0.0575681	0.0732547	-0.128815	-0.00854912	-0.533735	-0.0791893	0.180658	0.0391929	0.0648303	0.00236243	0.0179061	-0.00338098	-0.111785	-0.105725	-0.395204
TCGA-44-6774	0.00283256	-0.234222	0.126394	-0.057028	0.0203777	-0.0125624	0.0604929	0.214738	-0.0521209	-0.002933	-0.143243	-0.0393673	0.0230552	-0.533735	-0.0292162	0.153193	-0.0186215	0.081119	-0.0518144	0.0725653	0.0530474	-0.160058	-0.0103327	-0.193768
TCGA-44-6775	0.138968	-0.146197	0.130629	-0.0948579	0.0374821	-0.00237179	0.0932583	0.286485	-0.0472145	-0.0345548	-0.0978739	-0.0462214	-0.0195192	-0.533735	-0.0581395	0.213826	0.0969534	0.0900803	-0.0326896	0.0278122	0.069561	-0.119264	0.0508158	-0.289486
TCGA-44-6776	0.0395808	-0.237087	0.161754	-0.0605417	0.00703097	-0.0246857	0.0686608	0.0655106	-0.0321684	-0.124761	-0.0424032	-0.0815449	-0.047501	-0.533735	-0.0779509	0.185141	-0.00544955	0.0301002	-0.0441137	0.000363271	-0.00186694	0.0231607	-0.081103	-0.358315
TCGA-44-6777	0.136954	-0.122305	0.130252	-0.00081495	0.204426	-0.00840436	0.162715	0.30419	-0.00817972	0.0143113	-0.132293	-0.0058377	-0.0100782	-0.533735	0.012478	0.147702	-0.0351282	0.0908706	-0.0215434	0.0196359	0.0308278	-0.0431622	-0.0450583	-0.23124
TCGA-44-6778	0.203143	-0.0776213	0.186282	0.140266	-0.0218908	-0.00568008	0.11113	0.242556	-0.00369134	0.0414353	-0.0549727	-0.0175403	-0.0705648	-0.533735	0.169967	0.227318	0.0742702	0.0773222	0.0266383	0.0332391	0.0625068	-0.11655	0.0287761	-0.264149
TCGA-44-6779	0.166775	-0.234069	0.158134	0.197717	-0.0811093	-0.0341302	0.0207079	0.149014	-0.0438591	-0.0186378	0.0300444	0.0726759	-0.0577553	-0.533735	0.108212	0.201411	0.0263722	0.0521013	-0.0522068	-0.0290189	-0.00681391	-0.0468206	0.00121952	-0.144064
TCGA-44-7659	0.0921536	-0.12329	0.14337	-0.0717413	-0.049176	0.00490892	0.0487394	0.200264	-0.0569407	-0.133565	-0.0217975	-0.0572634	-0.0378713	-0.533735	-0.0551298	0.158842	0.0366474	0.0460313	0.0199848	-0.0657186	-0.0262889	0.019966	-0.0795148	-0.322881
TCGA-44-7660	0.122647	-0.18383	0.132837	-0.115244	-0.265714	-0.00663239	0.00374514	0.123915	-0.155641	-0.117283	-0.0958575	-0.0581853	-0.0335341	-0.533735	-0.0866823	0.226318	-0.0245478	0.0300885	-0.0729334	-0.0398042	-0.00860231	-0.179565	0.0223624	-0.286865
TCGA-44-7661	0.192053	-0.198594	0.132743	-0.0627412	0.15261	-0.0237888	0.0984147	0.200051	-0.098544	0.0138673	-0.0659182	0.0143228	-0.0348216	-0.533735	0.027581	0.211227	-0.0255239	0.0729099	-0.0306094	0.0127726	0.0751254	-0.141776	-0.000408438	-0.165518
TCGA-44-7662	0.0986701	-0.233331	0.148014	0.0296445	-0.0734733	-0.0617097	0.05296	0.218161	-0.11407	-0.038613	-0.0177555	0.0207333	-0.022404	-0.533735	-0.0440581	0.169133	-0.0230603	0.0670989	-0.0529101	0.0160617	0.0224573	-0.191082	-0.00541473	-0.260266
TCGA-44-7667	0.0214459	-0.25831	0.119902	-0.120524	-0.179501	-0.0799758	-0.0523831	0.0751924	-0.206316	-0.128181	0.0870061	-0.0244554	-0.0260857	-0.533735	-0.119568	0.18598	-0.047211	0.0838068	-0.0576821	-0.0172493	-0.0667492	-0.142382	0.0672822	-0.338899
TCGA-44-7669	0.154271	-0.15151	0.149491	-0.0187026	-0.116851	0.0035343	0.00992898	0.162644	-0.00976812	-0.0807058	-0.0209314	-0.0450482	-0.0626776	-0.533735	-0.0304379	0.197249	-0.0170002	0.0638476	-0.0572837	-0.0575692	-0.0298681	-0.232361	0.0398631	-0.311232
TCGA-44-7670	0.101369	-0.195444	0.147463	-0.100479	-0.149875	0.000911121	0.0627023	0.0718972	-0.0982641	-0.0833611	0.02569	-0.0081449	-0.0504138	-0.533735	-0.102834	0.187809	-0.0251527	0.0384621	-0.0429958	-0.0263922	0.0071455	-0.184615	-0.0277183	-0.37676
TCGA-44-7671	0.0164756	-0.254272	0.143593	-0.150021	-0.0531521	-0.00611318	0.0527626	0.131313	0.00375249	-0.0925209	-0.0059898	-0.0502334	-0.0462541	-0.533735	-0.155056	0.161941	-0.0208144	0.0273888	-0.0652953	0.00449738	0.0266051	0.0299289	-0.0577817	-0.425104
TCGA-44-7672	0.202851	-0.0485633	0.176665	0.0838669	0.151031	-0.0492877	0.0807672	0.241334	-0.0833402	-0.0744077	-0.00415336	0.047168	-0.0265892	-0.533735	0.101102	0.180944	-0.0151014	0.0428027	-0.0082892	-0.0247854	0.0661509	-0.0813344	-0.0380437	-0.105524
TCGA-44-8117	0.0933656	-0.24496	0.134629	-0.113154	-0.130341	-0.0528103	0.0246998	0.136207	-0.115962	-0.125264	-0.125837	-0.0418419	-0.0460859	-0.533735	-0.0986043	0.198565	-0.0146897	0.0646013	-0.0141611	0.0151538	-0.027701	-0.143504	-0.0350674	-0.32191
TCGA-44-8119	0.0605048	-0.166186	0.1752	0.00146613	-0.0752774	0.00419745	0.00620026	0.164122	-0.0671005	-0.0408447	-0.033388	-0.0255768	-0.0193325	-0.533735	0.00103732	0.186567	-0.0281176	0.0391903	-0.00837201	-0.0289637	-0.00137734	-0.218115	0.0578211	-0.332589
TCGA-44-8120	0.0435152	-0.232364	0.162446	-0.0538518	-0.0940191	-0.0311133	0.124254	0.193411	-0.0448781	-0.0632252	-0.00752206	-0.0110591	-0.0250981	-0.533735	-0.0533532	0.143021	0.0233336	0.0581674	-0.00503043	0.0332968	-0.0098062	-0.0491469	-0.0927489	-0.293855
TCGA-44-A479	0.214413	-0.0109373	0.178248	0.115809	-0.113024	-0.0346198	0.051642	0.177614	-0.112263	-0.0467818	-0.0571722	0.0283063	-0.0393437	-0.533735	0.164919	0.236628	0.0300438	0.0781391	0.046052	-0.0497027	0.0525985	-0.127935	0.000313728	-0.244442
TCGA-44-A47A	0.172388	-0.20193	0.148447	-0.0340862	0.224761	-0.0110211	0.186971	0.196578	-0.0938739	-0.0937178	-0.110983	-0.050426	-0.0676896	-0.533735	0.0059853	0.185636	0.00549759	0.0347956	0.0300387	-0.0884934	0.00356874	-0.0482174	-0.0552037	-0.146102
TCGA-44-A47B	0.171743	-0.272824	0.178362	-0.00233018	-0.158732	-0.0283809	0.066608	0.137252	-0.0664009	-0.0791096	-0.0952613	-0.00311402	-0.0589411	-0.533735	-0.0454774	0.193007	0.0331138	0.095173	-0.0132408	-0.0131525	0.033605	-0.0735792	-0.0282889	-0.323464
TCGA-44-A47G	0.196352	-0.0583866	0.187598	0.118417	0.0507158	-0.0321554	0.107758	0.27639	-0.0605957	-0.0237151	-0.00870649	-0.0193004	-0.0450617	-0.533735	0.130514	0.204595	0.0168268	0.0690285	0.0220403	-0.0442296	0.0695952	-0.134241	-0.0366294	-0.248131
TCGA-44-A4SS	0.151046	-0.166475	0.152217	0.0793085	-0.102967	-0.0304339	0.0538325	0.184825	-0.0954213	-0.0622024	-0.0119304	0.0394498	-0.0478573	-0.533735	0.0756427	0.17767	-0.0174693	0.0463862	-0.0212646	0.0140674	0.0221616	-0.10313	-0.0283417	-0.254053
TCGA-44-A4SU	0.148974	-0.0707023	0.152713	-0.0903108	-0.116739	-0.0198946	0.0931266	0.0865432	-0.0791668	-0.097513	-0.00947702	-0.0442827	-0.0300833	-0.533735	-0.0140328	0.193967	0.00478592	0.0811187	0.0524083	-0.0934641	-0.0224604	-0.137598	-0.0919775	-0.272789
TCGA-49-4486	0.0393141	-0.210099	0.159223	-0.0649874	-0.111669	-0.0391647	0.0395929	0.0806163	-0.102543	-0.153941	-0.0559451	-0.125551	-0.078725	-0.533735	-0.0770157	0.197848	-0.0117666	0.0122703	-0.00743064	-0.0808173	-0.00961162	0.0390245	-0.075046	-0.40831
TCGA-49-4487	0.183235	0.0116024	0.172062	0.139329	-0.0314714	-0.0646797	0.0500105	0.158863	-0.13482	-0.0882041	-0.0552763	0.0054825	-0.0464846	-0.533735	0.152617	0.197884	-0.029626	0.0404721	-0.0164009	-0.0078503	0.0455331	-0.122546	0.0481531	-0.189011
TCGA-49-4488	0.122078	-0.166785	0.149255	0.00464863	0.0198261	0.00140561	0.115605	0.119157	-0.11838	-0.109976	-0.0401226	-0.070824	-0.0528479	-0.533735	0.0210865	0.189223	-0.0663558	0.023266	0.0252443	-0.030869	0.0355548	-0.0619643	-0.0484933	-0.272304
TCGA-49-4490	0.089374	-0.208087	0.144306	-0.0614599	-0.110948	-0.0261201	0.0419904	0.106693	-0.134833	-0.0802897	-0.0374637	-0.0782346	-0.0227293	-0.533735	-0.0588746	0.165422	-0.0381744	0.0278262	-0.0386407	-0.103297	0.00545642	-0.0608173	-0.0818042	-0.313465
TCGA-49-4494	0.17932	-0.192717	0.144601	0.00774933	-0.0670171	-0.0568795	0.0920138	0.137731	-0.126418	-0.102006	-0.0437672	-0.0257568	-0.059466	-0.533735	-0.0153727	0.166225	-0.0734438	-0.0239844	-0.0222471	-0.0564872	-0.0102901	-0.0530083	-0.0173345	-0.283273
TCGA-49-4501	0.178996	-0.107011	0.175004	-0.00334169	0.158723	-0.0175637	0.0993946	0.191717	-0.0371753	-0.112399	-0.0444905	-0.094713	-0.0355361	-0.533735	0.0727203	0.177653	-0.0229758	0.0139912	0.0174978	-0.0206279	0.0325598	-0.0633036	-0.088258	-0.287545
TCGA-49-4505	0.20564	-0.138383	0.187184	0.0638948	0.061198	-0.00989565	0.140694	0.188218	-0.0051647	-0.0433495	-0.0436323	-0.00724594	-0.0500257	-0.533735	0.0579039	0.164283	-0.0456783	0.0258018	-0.00345452	-0.0407054	0.0476802	-0.0713259	-0.0915588	-0.233084
TCGA-49-4506	0.107531	-0.14431	0.159444	0.124635	-0.0884132	-0.0245619	0.0510167	0.116027	-0.167587	-0.0732149	-0.0541461	0.0317481	-0.0922462	-0.533735	0.0690392	0.18961	-0.0353256	0.0600507	-0.0727515	0.00515969	-0.0161511	-0.00547355	-0.0270679	-0.298029
TCGA-49-4507	0.118216	-0.181852	0.157312	0.207819	-0.163763	-0.0747908	0.0335966	0.106361	-0.103753	-0.0555147	0.0223002	0.0412554	-0.0484497	-0.533735	0.0898798	0.208175	-0.0535601	-0.0123247	-0.0550276	-0.0191419	0.0143188	-0.0881833	0.00900256	-0.237064
TCGA-49-4510	0.0732151	-0.163132	0.183403	0.00688123	0.0135959	-0.0405278	0.0708752	0.144435	-0.0607383	-0.103928	-0.0218874	-0.073147	-0.0329115	-0.533735	-0.0632391	0.197415	-0.0282579	0.0501931	-0.0183431	0.00669106	-0.0126249	-0.0870164	-0.0560438	-0.398893
TCGA-49-4512	0.206055	-0.180456	0.147497	-0.112022	0.031409	-0.0374127	0.0791542	0.199116	-0.0783433	-0.0847682	-0.0442097	-0.0746136	-0.0208759	-0.533735	-0.119016	0.156468	-0.0197133	0.0320869	-0.011506	-0.0767028	-0.00395933	-0.140868	-0.0982691	-0.249393
TCGA-49-4514	0.151241	-0.12357	0.147016	0.046102	0.00711753	-0.0371618	0.0340076	0.0824418	-0.097217	-0.10766	-0.0474551	0.010953	-0.0965265	-0.533735	0.0297804	0.162542	-0.0350494	-0.00453536	-0.0263153	-0.0634368	0.0270527	-0.0912337	0.0267775	-0.205029
TCGA-49-6742	0.140242	-0.267172	0.155353	-0.0696515	-0.131611	0.0100273	0.00812448	0.0822676	-0.108494	-0.0499466	-0.00869096	-0.0613673	-0.0959822	-0.533735	-0.158869	0.161492	-0.0206249	0.00971473	-0.0859121	-0.00755087	-0.00852535	0.0153339	0.00803668	-0.411999
TCGA-49-6743	0.17042	-0.175026	0.109868	-0.0702996	-0.130935	-0.044898	0.0782972	0.166603	-0.109629	-0.0175351	-0.0882943	-0.0214296	-0.0225789	-0.533735	-0.0512603	0.182049	-0.0134005	0.0291223	-0.0642288	0.180648	0.0469926	-0.0446757	0.0365787	-0.314921
TCGA-49-6744	0.207032	-0.125854	0.182952	0.112573	0.165288	0.0255709	0.173049	0.257984	0.0076821	-0.0123517	-0.095978	0.000737606	-0.0332554	-0.533735	0.116661	0.170707	0.0115113	0.0466066	-0.0076638	0.024146	0.0682416	0.0204339	-0.0459005	-0.170954
TCGA-49-6745	0.17744	-0.192985	0.147004	-0.00331358	0.0337049	-0.0177436	0.0850343	0.226271	-0.0531961	-0.0367213	-0.07275	-0.0244243	-0.0446438	-0.533735	0.0720735	0.206117	-0.00581792	0.0562985	-0.0322416	0.00916876	0.0678836	-0.0773648	0.00242709	-0.214154
TCGA-49-6761	0.125	-0.141173	0.170045	0.072961	-0.0362112	-0.0476864	0.0188571	0.128582	-0.165453	-0.103517	-0.0410996	0.0540247	-0.00463127	-0.533735	0.0378151	0.161168	-0.0646756	0.0312945	0.011374	-0.00948919	0.0600794	-0.092628	-0.0361329	-0.289486
TCGA-49-6767	0.22971	-0.256965	0.144898	0.0756342	-0.0406675	-0.051671	0.0383236	0.129396	-0.236883	-0.128511	-0.0559945	0.0107711	-0.0547816	-0.533735	0.0344585	0.199289	-0.0351623	0.0587352	-0.0682929	-0.0772191	0.0324756	-0.23027	-0.003815	-0.241336
TCGA-49-AAQV	0.150497	-0.103862	0.156243	-0.0201582	-0.0365768	-0.0546727	0.00581312	0.121224	-0.113929	-0.0490255	0.020428	-0.0454071	-0.0749817	-0.533735	0.0188409	0.19504	-0.0127019	0.0359256	0.0020369	-0.091024	-0.0179437	-0.0228177	-0.0246405	-0.275993
TCGA-49-AAR0	0.108445	-0.13208	0.145626	0.0410322	-0.0631491	-0.000124118	0.11584	0.172136	-0.0262357	-0.0648897	0.029913	0.000675315	-0.0206086	-0.533735	0.0101789	0.182829	-0.00597348	0.0124625	0.0199969	-0.145251	-0.00320419	-0.0580591	-0.0571683	-0.273469
TCGA-49-AAR2	0.143686	-0.1228	0.137154	0.0251774	-0.204364	-0.028879	0.0244768	0.0624188	-0.132825	-0.078205	0.0683161	-0.0248899	-0.0555251	-0.533735	-0.0336878	0.203125	-0.0384689	0.0164497	-0.0495531	-0.121664	-0.0704918	0.0261902	-0.0296899	-0.313173
TCGA-49-AAR3	0.218371	-0.127868	0.148665	0.166208	0.0240219	-0.0616379	0.0506248	0.208503	-0.178016	-0.0506107	-0.0153493	0.0701619	-0.0247766	-0.533735	0.0978256	0.195695	-0.0375867	0.0361978	-0.0287311	-0.0722624	0.0909011	-0.168886	-0.00314057	-0.192894
TCGA-49-AAR4	0.119184	-0.122066	0.198116	0.174222	-0.0248147	-0.0291945	0.018359	0.181166	-0.1195	-0.125881	0.0352183	0.0154136	-0.0499171	-0.533735	0.207958	0.210247	0.012508	0.115563	0.00487098	-0.0794169	0.0489254	-0.0784178	-0.0291815	-0.264732
TCGA-49-AAR9	0.0679636	-0.29566	0.148253	-0.111583	-0.180841	-0.0388632	-0.0261428	0.0566149	-0.139472	-0.104956	-0.0652161	-0.04714	-0.0266216	-0.533735	-0.169879	0.128532	-0.0411346	0.0140035	-0.00175739	-0.00496897	0.00194655	-0.272722	0.0302763	-0.376565
TCGA-49-AARE	0.130322	-0.194858	0.134611	-0.0613558	-0.156369	-0.0305479	0.0180243	0.103936	-0.196926	-0.110498	-0.0211488	-0.0307371	-0.0502445	-0.533735	-0.0429241	0.139592	-0.0481234	0.0500105	-0.0572177	0.00530696	-0.0290607	-0.12797	-0.0105729	-0.261431
TCGA-49-AARN	0.237349	-0.106392	0.14747	-0.0683251	-0.140564	-0.0190458	0.0370941	0.0943793	-0.0949117	-0.0814338	-0.0578795	-0.0403566	-0.0394799	-0.533735	-0.0213865	0.178413	-0.0205781	0.0368326	0.0137185	-0.0692453	-0.00134527	-0.0295561	-0.0715524	-0.356859
TCGA-49-AARO	0.253735	-0.12647	0.164862	0.0507739	0.160771	-0.0372097	0.151179	0.225127	-0.124093	-0.0664729	0.0244129	0.0414374	-0.0237401	-0.533735	0.0190686	0.181021	-0.0156053	0.0694364	-0.0227704	-0.0805936	0.083683	-0.108823	-0.0768925	-0.1794
TCGA-49-AARQ	0.230412	-0.171714	0.121921	0.0409783	-0.214964	-0.0668272	0.0369771	0.0824248	-0.173278	-0.0706938	0.0522433	-0.0240345	-0.0345911	-0.533735	-0.0751262	0.195258	-0.032599	0.0358882	0.00991496	-0.183201	-0.0153882	-0.00502291	-0.00914283	-0.286186
TCGA-49-AARR	0.0874682	-0.104759	0.148536	0.025587	-0.0527074	0.0189759	0.0544762	0.170792	0.0278167	0.0150409	0.112103	-0.0604279	0.0292402	-0.533735	0.00665261	0.184236	0.0352923	0.0615392	-0.0350844	0.0201435	0.0330703	-0.09164	-0.0286536	-0.38074
TCGA-4B-A93V	0.0220308	-0.120253	0.163283	0.0482262	-0.218971	-0.00342583	0.00939558	0.0798841	-0.104685	-0.0812694	-0.00301835	0.063872	-0.0440068	-0.533735	-0.0300407	0.159737	-0.0055799	0.0414135	-0.0315937	-0.0161009	-0.0398162	-0.0585677	0.00877087	-0.334531
TCGA-50-5044	0.195947	-0.214816	0.174921	0.0712884	0.0803663	-0.0277197	0.0627847	0.117325	-0.140686	-0.0179959	-0.00312794	0.0298417	0.00245718	-0.533735	0.00115086	0.176093	-0.0724876	0.0158659	-0.0492802	-0.009129	0.0719814	-0.178853	-0.0106155	-0.188428
TCGA-50-5045	0.190055	-0.0016201	0.160758	0.0923215	0.129304	-0.0422956	0.167351	0.254084	-0.0474314	-0.0337716	-0.0657702	-0.00159103	-0.0436685	-0.533735	0.157595	0.201125	-0.0441016	0.0314303	0.00511432	0.0382771	0.0700237	-0.138047	-0.0276163	-0.118144
TCGA-50-5049	0.182336	-0.0468921	0.198097	0.191377	0.0387076	-0.0534131	0.125016	0.261871	-0.126359	-0.0549483	-0.0841256	0.024086	-0.0483799	-0.533735	0.219392	0.202505	-0.00134181	0.0456721	-0.011485	0.0114578	0.0710683	-0.136544	-0.0298574	-0.148432
TCGA-50-5051	0.251053	-0.13781	0.126721	-0.0956575	-0.135044	0.00494932	0.0696243	0.0625325	-0.00962261	-0.073996	0.0119072	-0.0623641	-0.0489633	-0.533735	-0.100821	0.17095	-0.0174174	0.0508994	-0.0418732	-0.0472772	-0.0368177	-0.065409	0.0216297	-0.361615
TCGA-50-5055	0.184185	0.141964	0.195287	0.173669	0.118354	-0.0569903	0.150814	0.185709	-0.0538138	-0.0776268	-0.0520606	-0.0160207	-0.0442441	-0.533735	0.237175	0.219081	-0.0107131	0.0621084	0.0335519	0.0210427	0.0429831	-0.112413	-0.0530618	-0.102514
TCGA-50-5066	0.0734473	-0.156877	0.172952	0.0148282	-0.0496787	-0.0329603	0.101897	0.182426	-0.117559	-0.0597174	-0.0144381	-0.0229217	-0.0808759	-0.533735	0.0366843	0.230027	-0.0202291	0.0133198	-0.0197872	-0.0235135	0.0362034	-0.213286	0.0175286	-0.351422
TCGA-50-5068	0.169868	-0.0375432	0.175247	0.129033	-0.0343078	-0.0532094	0.179965	0.197969	-0.0752507	-0.0869872	-0.0879572	-0.0307288	-0.0925412	-0.533735	0.164709	0.218415	-0.0134889	0.00900511	-0.0169881	0.0769287	0.0516075	-0.136106	-0.0129441	-0.312979
TCGA-50-5072	0.175045	-0.239719	0.129909	-0.111092	-0.110184	-0.0322308	0.0495715	0.15404	-0.0986156	-0.0509182	-0.048097	-0.0584913	-0.0633936	-0.533735	-0.0994502	0.174519	-0.0289623	0.0092059	-0.0730086	-0.00166846	0.00311613	-0.0613729	0.0568752	-0.311523
TCGA-50-5930	0.103942	-0.117881	0.168569	0.0534357	-0.10212	-0.0295679	0.0443823	0.161753	-0.0962409	-0.0851766	-0.00780763	-0.00218726	-0.0405223	-0.533735	0.0090463	0.168816	-0.0260388	0.0292157	-0.0284767	-0.0156076	0.000779313	-0.0180428	-0.052135	-0.328803
TCGA-50-5931	0.133917	-0.191112	0.146139	-0.159034	-0.220393	-0.0136791	-0.0915362	0.00387622	-0.148321	-0.131676	-0.0882058	-0.0632687	-0.0201004	-0.533735	-0.165558	0.192361	-0.0136068	0.031582	-0.0205383	-0.000409459	-0.0255817	-0.266722	0.0493436	-0.365207
TCGA-50-5932	0.0400173	-0.241998	0.177809	-0.0996058	-0.0606328	-0.0293851	0.0187133	0.115559	-0.0820562	-0.157294	-0.025306	-0.0846663	-0.0710797	-0.533735	-0.0827814	0.186421	0.0286377	0.0598416	-0.0262757	-0.0198156	-0.0238709	0.0445085	-0.0939557	-0.399767
TCGA-50-5933	-0.0149424	-0.236499	0.142243	-0.075419	0.0432474	0.0101514	0.0522281	0.249014	-0.0963292	-0.062207	-0.141054	-0.0223154	-0.0139792	-0.533735	-0.0832352	0.154536	-0.0229794	0.0559141	-0.0458793	0.0351359	0.0174948	-0.0773012	-0.0201324	-0.240559
TCGA-50-5935	0.165992	-0.196962	0.176965	0.00669571	0.209323	0.00219567	0.0876757	0.183328	-0.0702353	-0.0762587	-0.0538024	-0.0706567	-0.053101	-0.533735	0.0382044	0.166965	0.0015949	0.0582232	0.00369698	-0.0511346	-0.00108057	-0.0563239	-0.0681644	-0.23056
TCGA-50-5936	0.0984702	-0.226175	0.137772	-0.125642	0.0172994	-0.0258643	0.0598947	0.189266	-0.0801144	-0.0300873	-0.0412643	-0.0614966	-0.0327546	-0.533735	-0.071067	0.17914	0.0350842	0.0227663	-0.0300214	-0.0036498	-0.0518993	-0.155953	-0.0114636	-0.215222
TCGA-50-5939	0.0855472	-0.151224	0.149885	-0.0604755	-0.0343816	-0.0275669	0.113155	0.193814	-0.0701036	-0.00456396	0.100239	-0.0191991	-0.0315247	-0.533735	-0.0713286	0.172763	-0.00729097	0.0218493	-0.0715073	-0.000650084	0.0163529	-0.056125	-0.00642058	-0.278225
TCGA-50-5941	0.260805	-0.0900984	0.168924	0.111563	-0.0209426	-0.0314763	0.109995	0.196823	-0.0670607	-0.0306983	-0.0647399	0.0373518	-0.0578432	-0.533735	0.132739	0.188608	-0.00105004	0.057074	0.00974591	0.0129354	0.0433459	-0.047822	-0.0347081	-0.161052
TCGA-50-5942	0.0722253	-0.136653	0.16134	-0.0777814	-0.0163701	0.0307351	0.0389257	0.108969	0.0665605	-0.0610412	-0.0645862	-0.0945533	-0.022944	-0.533735	0.059884	0.177483	0.035989	0.0592752	0.0155293	-0.00247437	-0.0152098	0.0449324	-0.0744077	-0.347636
TCGA-50-5944	0.101809	-0.197639	0.149598	-0.127799	-0.0413827	-0.00563303	0.085449	0.222751	0.055848	-0.0949213	-0.0813568	-0.0946361	-0.0196813	-0.533735	-0.110574	0.169468	-0.000798988	0.0344408	-0.0320098	0.0191292	0.00115821	-0.0850467	-0.057693	-0.389768
TCGA-50-5946	0.104105	-0.219007	0.165808	-0.0913301	-0.200328	-0.0102542	-0.0309374	0.10653	-0.152253	-0.147357	-0.0476265	-0.076636	-0.0365487	-0.533735	-0.111521	0.171541	-0.0185773	0.0562788	-0.0131155	0.0117965	-0.00991456	-0.120754	0.0355952	-0.326861
TCGA-50-6590	0.211989	-0.124135	0.150573	0.0574952	-0.0231045	-0.0301596	0.0507639	0.170627	-0.182172	-0.0555603	-0.0454598	0.0531697	-0.0421586	-0.533735	0.0308669	0.211479	-0.0316397	0.0371004	-0.0691675	-0.0312557	0.0186427	-0.0999558	-0.00265319	-0.199786
TCGA-50-6591	-0.138894	-0.193016	0.110712	-0.192756	-0.324968	-0.0358193	-0.053421	-0.0197811	-0.224614	-0.221701	-0.120821	-0.0903493	0.0164367	-0.533638	-0.136235	0.235093	0.0499384	0.121266	-0.00243927	0.0260029	-0.0686611	-0.207393	0.107258	-0.462771
TCGA-50-6592	0.173184	-0.213114	0.129024	0.0908544	-0.000557659	-0.0529546	0.079041	0.20067	-0.111833	0.00435194	-0.0856113	0.0345831	-0.0310637	-0.533735	0.0447959	0.169493	-0.0315508	0.0371424	-0.0456771	0.0308088	0.0523589	-0.219329	0.0460974	-0.296573
TCGA-50-6593	0.0334077	-0.223757	0.123117	-0.126466	-0.041888	-0.0140237	0.123847	0.253332	-0.0528891	-0.0280708	-0.076603	-0.0657093	-0.0247994	-0.533735	-0.108272	0.169525	-0.0454174	0.0396322	-0.0188229	-0.0329763	0.00604367	-0.051718	-0.0503419	-0.287642
TCGA-50-6594	-0.000419457	-0.237296	0.132274	-0.112036	-0.0697097	0.00619472	-0.00538218	0.120193	-0.148756	-0.131396	-0.0832683	0.0232382	0.00325085	-0.533735	-0.050674	0.188092	-0.0451471	0.0428434	-0.0473873	0.0131289	0.0576507	0.0282205	-0.0610782	-0.276478
TCGA-50-6595	0.241048	-0.253866	0.130948	0.00903257	-0.0561237	-0.0458378	0.0439532	0.184823	-0.175778	-0.013609	-0.02731	0.0359181	-0.0150469	-0.533735	-0.0600405	0.166893	-0.0382885	0.0142597	-0.0615323	0.040247	0.0435706	-0.218553	0.0288357	-0.269974
TCGA-50-6597	0.220285	-0.106598	0.163417	0.0476176	0.0732284	-0.051428	0.128783	0.131235	-0.0894054	-0.104437	-9.17e-05	-0.103499	-0.046006	-0.533735	0.0776326	0.158876	-0.033525	0.0166975	0.0292511	-0.10082	0.018352	-0.0831175	-0.03295	-0.0646539
TCGA-50-6673	0.0800834	-0.172213	0.126272	-0.13761	0.0381392	-0.0106358	0.0828207	0.202323	-0.104953	-0.0578246	-0.0907885	-0.0641874	-0.0271046	-0.533735	-0.0392935	0.169266	-0.016064	0.0400504	0.0112001	0.00242675	0.0442781	-0.0771177	-0.053547	-0.307446
TCGA-50-7109	0.250044	-0.159112	0.165457	0.0534947	-0.199702	-0.022066	0.0376274	0.108384	-0.0853464	-0.0619764	0.012564	0.00367375	-0.0544657	-0.533735	0.0245046	0.194544	0.00434111	0.0501089	-0.0250892	0.0176906	-0.017753	0.0069009	0.0373228	-0.311814
TCGA-50-8457	0.0557112	-0.0374658	0.214113	0.0724245	0.0204515	-0.00246255	0.123773	0.177957	0.0193862	-0.097754	-0.083624	-0.0507535	-0.0259385	-0.533735	0.0697252	0.184885	0.044082	0.0741293	0.055253	-0.0337774	0.0684432	0.0315203	-0.0969566	-0.271333
TCGA-50-8459	0.0294841	-0.122288	0.161752	0.00513594	0.0931209	-0.0140809	0.139004	0.260072	0.0172387	-0.0299604	0.0421435	-0.0249923	0.0188882	-0.533735	0.0206399	0.175491	-0.0360363	0.0718389	-0.0513606	0.0337719	0.0112944	-0.109438	-0.0741964	-0.231919
TCGA-50-8460	0.108807	-0.108471	0.175819	0.014617	0.0992039	-0.0161202	0.159082	0.174271	0.0355973	0.00943008	-0.0404169	-0.0724994	-0.0236896	-0.533735	0.0623001	0.197964	0.00855099	0.0475175	0.028026	-0.0658612	0.0128247	-0.0612703	-0.0541571	-0.121153
TCGA-53-7624	0.272213	-0.166156	0.13108	-0.0577359	-0.0923729	-0.0617073	0.014776	0.102178	-0.151348	-0.0646929	-0.125706	-0.0485556	-0.0486117	-0.533735	-0.0979259	0.21126	-0.0205347	0.0446302	-0.092041	-0.0337852	0.00738822	-0.232628	0.0785068	-0.31861
TCGA-53-7626	0.169722	-0.0991942	0.203733	0.133934	-0.03358	0.021308	0.143595	0.202942	0.00421592	0.00289834	-0.0297003	-0.00367883	-0.0412091	-0.533735	0.130147	0.203514	0.0259701	0.0529584	0.0171418	0.025825	0.0618978	-0.125835	-0.0527126	-0.255995
TCGA-53-7813	0.227186	-0.0832817	0.137556	-0.0155152	-0.189454	-0.0254919	-0.0451737	0.0716154	-0.0965001	-0.100245	-0.0515094	-0.0268729	-0.0602609	-0.533735	0.0405814	0.219569	0.0360855	0.0292033	0.0182753	-0.0174262	0.0288835	0.00991941	0.0375963	-0.397534
TCGA-53-A4EZ	0.106747	-0.136885	0.134021	-0.0835306	-0.145979	-0.0193327	0.0412532	0.0571954	-0.111022	-0.114005	-0.0828166	-0.157497	-0.0777321	-0.533735	-0.112238	0.199669	-0.0216175	0.0298517	-0.0316304	-0.0856036	-0.0556299	0.0527512	0.00940325	-0.339773
TCGA-55-1592	0.0753298	-0.230238	0.122184	-0.122041	-0.00225859	-0.0301739	0.129886	0.251585	-0.0653173	-0.0777152	-0.0500113	-0.135027	-0.0547274	-0.533735	-0.110792	0.178552	0.00317476	0.0478801	-0.0678718	-0.00463918	-0.0168277	-0.0425088	-0.0313619	-0.270459
TCGA-55-1594	0.0291778	-0.152826	0.115128	-0.0651888	-0.144561	-0.0199118	0.0540837	0.142757	-0.116329	-0.0730197	-0.0690325	-0.0730225	-0.053551	-0.533735	-0.00923237	0.204242	-0.0166694	0.0443695	-0.0626972	-0.00748295	-0.0328657	-0.217561	-0.0390432	-0.35317
TCGA-55-1595	0.132346	-0.157453	0.167499	-0.0211304	-0.136665	-0.0291519	0.0232823	0.144365	-0.119826	-0.119953	-0.0858276	-0.034019	-0.0270591	-0.533735	-0.055733	0.182544	-0.0102127	0.0789126	-0.0150812	-0.0216373	-0.0138764	-0.0870025	-0.000809263	-0.257839
TCGA-55-1596	0.208613	-0.230973	0.135155	-0.134312	-0.0864599	-0.0655695	0.0406099	0.0630354	-0.111024	-0.124245	-0.0387305	-0.0856421	-0.0792681	-0.533735	-0.0491387	0.169929	-0.00910501	0.00585791	-0.076341	0.0183482	-0.0448747	-0.0816298	-0.0204047	-0.233278
TCGA-55-5899	0.0293189	-0.186498	0.126282	-0.0133018	-0.131237	-0.0234254	0.0573618	0.14847	-0.0526779	-0.0823814	0.0186838	-0.0660284	-0.0808519	-0.533735	0.00250317	0.185426	-0.0349598	0.0406212	0.000621192	-0.00263123	-0.00167767	-0.195711	-0.00284082	-0.261625
TCGA-55-6543	0.16894	-0.205674	0.126005	-0.0526164	-0.0492253	0.00377598	0.101653	0.22225	-0.0261436	0.0306793	-0.0178471	-0.0733363	-0.0400703	-0.533735	-0.0568307	0.166488	-0.0145118	0.0537815	-0.0422847	-0.0306151	-0.0177858	-0.110387	-0.046331	-0.373653
TCGA-55-6642	0.107937	-0.135903	0.158606	0.0392555	-0.0916135	-0.0198962	0.0272165	0.138236	-0.0900154	-0.0816325	-0.0719045	0.0728711	-0.0149325	-0.533735	0.0416131	0.185739	0.0152892	0.0705105	-0.0529461	0.0682701	0.010441	-0.119227	0.0348222	-0.274828
TCGA-55-6712	0.212625	-0.14751	0.186084	0.137565	0.0799234	-0.0407845	0.0765883	0.218694	-0.0748548	-0.0936423	-0.0963369	0.0353088	-0.0555611	-0.533735	0.114722	0.192277	0.0190251	0.0493401	-0.0182572	-0.0418885	0.0258084	-0.132123	-0.00559411	-0.222114
TCGA-55-6968	0.110705	-0.149685	0.11918	0.00399555	-0.127029	0.0228217	0.00812285	0.149501	-0.0716857	-0.137206	-0.0269027	-0.0186062	-0.0176733	-0.533735	0.0318742	0.202051	0.00950925	0.0262488	0.00961425	-0.0126489	0.0503374	-0.154631	0.0703592	-0.311911
TCGA-55-6969	0.158259	-0.0586523	0.166595	0.0994338	-0.07191	-0.0156688	0.0195863	0.182715	-0.135581	-0.118544	-0.0929961	0.00824148	-0.0315329	-0.533735	0.134692	0.182775	-0.018181	0.0572212	-0.0186527	-0.0323834	0.00572809	-0.193086	0.0153046	-0.211921
TCGA-55-6970	0.206358	-0.156732	0.172914	-0.0204862	-0.0516959	-0.0235884	0.0427371	0.156891	-0.0942866	-0.0451581	-0.0557872	-0.0324354	-0.0859742	-0.533735	0.0284926	0.197789	-0.00209038	0.0561463	-0.0408766	0.0292725	-0.00253129	0.0214934	-0.0268622	-0.288322
TCGA-55-6971	0.243217	-0.0235874	0.198085	0.144408	-0.0735756	-0.0183766	0.0959873	0.219407	-0.0504134	0.0388273	-0.0521378	0.0186789	-0.0526301	-0.533735	0.151984	0.199074	0.0201572	0.0924426	0.0193493	-0.0244425	0.0579583	-0.0386572	-0.0170789	-0.252888
TCGA-55-6972	-0.00588611	-0.24179	0.152301	-0.045285	-0.144251	-0.0301963	-0.0513778	-0.00778017	-0.151209	-0.203152	-0.0490557	-0.14643	-0.0893532	-0.533735	-0.0727836	0.212535	0.0382136	0.0440437	-0.0683634	0.000632959	-0.0296687	-0.0197598	-0.0935312	-0.457431
TCGA-55-6975	0.0563847	-0.203446	0.116875	-0.122324	-0.0162205	-0.0448022	0.0150535	0.128255	-0.0855089	-0.0740247	-0.0858535	-0.0314626	-0.0172477	-0.533735	-0.087404	0.17808	-0.0109676	0.04798	-0.0707069	0.0236374	-0.00902257	-0.101198	0.0252275	-0.306863
TCGA-55-6978	0.252694	-0.20818	0.169036	0.195294	0.0338334	-0.039313	0.0469749	0.235539	-0.13891	-0.0488469	-0.0322035	0.0285894	-0.0249431	-0.533735	0.156627	0.213458	0.00456069	0.0724246	-0.0251251	0.0470745	0.0894987	-0.193564	0.0185542	-0.204252
TCGA-55-6979	0.262754	-0.103723	0.154834	0.088916	-0.0268996	-0.052449	0.0754749	0.233419	-0.0702776	-0.0262727	-0.0941049	0.0258025	-0.0371382	-0.533735	0.122138	0.191484	-0.0176078	0.0671953	0.0398951	-0.0475715	0.0654305	-0.110331	0.000710733	-0.198524
TCGA-55-6980	0.140489	-0.215834	0.163568	0.00239545	0.144466	-0.00125037	0.125029	0.175709	-0.0306129	-0.0643503	-0.04531	-0.0554712	1.08e-05	-0.533735	0.057069	0.183614	-0.000899707	0.0489915	-0.00951984	-0.0411754	0.0702505	-0.0820006	-0.0645835	-0.206873
TCGA-55-6981	0.0694687	-0.152609	0.115582	-0.0794896	0.00180625	-0.0214257	0.09309	0.154333	-0.0326835	-0.084131	-0.0815957	-0.0787649	-0.0425833	-0.533735	-0.0972544	0.155875	-0.0418241	0.04089	-0.0114593	-0.104285	-0.000450128	-0.105199	-0.0215759	-0.32026
TCGA-55-6982	0.242452	-0.153835	0.131236	-0.0859365	0.00554734	-0.0240085	0.0726002	0.253513	-0.133035	-0.0681943	-0.05541	-0.05088	-0.022979	-0.533735	-0.0761682	0.166364	-0.03206	0.0369318	-0.0347094	-0.0358993	0.0551276	-0.135664	-0.0448105	-0.264635
TCGA-55-6983	0.0946087	-0.0103393	0.172179	0.0521494	-0.0844468	-0.0309724	0.0978949	0.170434	-0.0523014	-0.0863175	0.00801875	-0.00183402	-0.0370338	-0.533735	0.0874669	0.172906	-0.00923246	0.0459178	0.0200489	-0.042966	-0.00348706	-0.121693	-0.0259833	-0.319581
TCGA-55-6984	0.0191633	-0.165279	0.168587	-0.113523	-0.153534	0.0205592	0.00511412	0.0332259	-0.0788381	-0.0468253	0.0434244	-0.0308132	-0.0599077	-0.533735	-0.0325575	0.186718	-0.0419974	0.015249	-0.0555412	-0.0415383	-0.00771575	-0.0623875	-0.0125834	-0.339676
TCGA-55-6985	0.177723	-0.158324	0.164244	0.0991234	-0.0519919	-0.00666836	0.0613903	0.168215	-0.0614281	-0.0309753	0.0411292	0.04572	-0.0418149	-0.533735	0.0566323	0.185388	-0.00338157	0.0394334	0.0232807	-0.0439547	0.0511803	-0.138539	-0.0334004	-0.296476
TCGA-55-6986	0.0215808	-0.158797	0.157431	-0.0662533	-0.0248449	-0.000753691	0.131524	0.146988	-0.0862286	-0.0818498	-0.0867949	-0.0817222	-0.0312746	-0.533735	0.0346792	0.185563	-0.00730108	0.0736718	0.0115184	-0.0266217	-0.0213406	-0.0265682	-0.0566884	-0.348995
TCGA-55-6987	0.235422	0.00914067	0.177094	0.258072	-0.0504909	-0.0524452	0.0585742	0.23093	-0.0792702	0.0247059	-0.0368252	0.0442819	-0.0665704	-0.533735	0.178917	0.208177	0.0180598	0.0646272	-0.00725122	-0.0494192	0.0619688	-0.0934856	0.0100522	-0.27075
TCGA-55-7227	0.158978	-0.20585	0.164019	0.0656284	0.0553218	-0.00849607	0.136834	0.244736	-0.080307	-0.0789158	-0.0985648	-0.0396997	-0.0341627	-0.533735	0.105106	0.224701	0.0432687	0.0565983	-0.00684194	-0.021345	0.0427482	-0.0922186	-0.0363751	-0.212601
TCGA-55-7281	0.168663	-0.221835	0.163883	0.0357373	0.100307	0.00241479	0.196998	0.215654	-0.0951017	-0.0436866	-0.0289071	0.00476643	-0.0256764	-0.533735	-0.0248691	0.146077	-0.014003	0.0517489	-0.0264746	-0.0856697	0.0768903	-0.0555626	-0.0516695	-0.176876
TCGA-55-7283	0.138992	-0.23433	0.174641	0.0404835	0.0464602	0.00132133	0.0715413	0.142697	-0.0415976	-0.0749105	0.0434269	-0.071665	-0.0209781	-0.533735	0.0181539	0.172284	0.00285043	0.0553674	-0.0106703	0.0534599	0.0184667	0.0198089	-0.0506585	-0.331812
TCGA-55-7284	0.14497	-0.244814	0.156173	-0.0188735	-0.0527769	0.0295697	0.0639787	0.245066	-0.0349277	-0.0561501	0.0154843	-0.0354063	-0.0206652	-0.533735	-0.0267544	0.168765	-0.0155511	0.0296737	-0.0624274	0.0141952	-0.0118348	-0.0771624	-0.0661807	-0.351228
TCGA-55-7570	-0.0777912	-0.207683	0.140902	-0.136898	-0.244079	-0.0171133	-0.0344959	0.0127508	-0.0736179	-0.125741	-0.0988935	-0.0308033	-0.0231647	-0.533735	-0.101923	0.218247	0.0374051	0.011814	-0.0643328	0.0054955	-0.0698593	-0.234253	0.0364787	-0.335016
TCGA-55-7573	0.116418	-0.0342211	0.149492	-0.0261709	0.0156094	0.00183713	0.136218	0.147463	-0.0392935	-0.0715841	-0.0590534	-0.0617497	-0.0233084	-0.533735	0.0440146	0.200141	0.0480417	0.0503385	0.0535469	-0.0211233	0.0165798	-0.124476	-0.0965855	-0.283856
TCGA-55-7574	0.176899	0.0155323	0.205977	0.167051	-0.00371149	-0.0387843	0.0467002	0.175533	-0.0393289	-0.0527188	-0.0812314	0.00303636	-0.032425	-0.533735	0.142624	0.215943	0.0570083	0.0747669	0.0229734	-0.0106752	0.0321263	0.0540768	-0.0191583	-0.27211
TCGA-55-7576	0.111281	-0.180518	0.161186	-0.0848699	-0.0372319	-0.00538503	0.108064	0.21526	-0.114987	-0.104628	-0.138225	-0.0634872	-0.0650691	-0.533735	-0.0267506	0.171787	-0.00775877	0.0628821	-0.0101208	-0.0161544	-0.0114961	-0.0219443	-0.0477179	-0.238909
TCGA-55-7724	0.223678	-0.089481	0.153779	0.0461763	0.0290887	-0.00980026	0.131271	0.229289	-0.0168126	0.0493554	-0.186079	-0.0414218	-0.0720615	-0.533735	0.0657958	0.215625	0.0259822	0.0510484	-0.0301094	0.0836402	0.0360969	-0.156756	0.00202582	-0.377827
TCGA-55-7725	0.179856	-0.045272	0.171154	0.0137605	0.0454116	0.0263266	0.0614519	0.177848	0.0393725	-0.0794414	-0.138788	-0.0814534	-0.0715366	-0.533735	0.196567	0.228324	0.101939	0.0538309	0.0647492	0.00227771	0.0398491	-0.0187088	-0.0126797	-0.294049
TCGA-55-7726	-0.00819803	-0.217657	0.101422	-0.129978	-0.0161623	-0.0306691	0.0830526	0.149503	-0.112023	-0.0450375	-0.124899	-0.0322699	0.0185448	-0.533735	-0.116386	0.201777	-0.00210601	0.0284209	-0.0504117	0.0620738	0.0282033	-0.190046	0.00328936	-0.30599
TCGA-55-7727	0.153213	-0.0213013	0.150824	-0.0471124	-0.0513345	-0.0190208	0.0619647	0.177622	-0.0952492	-0.117504	-0.129522	-0.111073	-0.0714073	-0.533735	0.0708546	0.24022	0.0965649	0.0737863	0.0277962	0.0116016	0.0325734	-0.0552505	0.0365455	-0.270168
TCGA-55-7728	0.17652	-0.0887449	0.145065	0.0646215	0.0751301	-0.01563	0.173455	0.25502	-0.0905541	-0.0634906	0.114882	-0.0226696	-0.0624294	-0.533735	0.0312205	0.165808	-0.0104713	0.0580805	-0.0226454	-0.115538	-0.0219899	0.003802	-0.0702594	-0.196097
TCGA-55-7815	0.0105679	-0.0769607	0.152411	-0.0463275	0.0739216	-0.0133323	0.0492954	0.240643	-0.060938	-0.0767223	-0.147364	-0.0672381	-0.0673129	-0.533735	0.141779	0.239981	0.0880681	0.0687607	0.0380782	0.0434071	0.00227577	-0.0683121	0.0414901	-0.285603
TCGA-55-7816	0.0708138	-0.25762	0.146337	0.0344745	0.083873	-0.018275	0.0748722	0.226745	-0.0540559	-0.0143208	-0.163396	-0.0794722	-0.0150032	-0.533735	-0.0119234	0.187742	0.0306556	0.128892	-0.0670319	0.0180061	0.0373246	-0.0254907	-0.0448684	-0.355305
TCGA-55-7903	0.223991	-0.227028	0.162822	0.0214748	-0.0949302	-0.0286972	0.0326504	0.115254	-0.135497	-0.080012	-0.0761326	-0.0112586	-0.0529516	-0.533735	-0.0157262	0.173563	0.0129317	0.0730815	-0.0236294	-0.040341	0.0249474	-0.0304254	-0.0277461	-0.319192
TCGA-55-7907	0.0294454	-0.180282	0.160232	0.0391993	-0.103744	-0.0332167	0.0776518	0.156762	-0.101397	-0.113855	-0.0429623	0.00652483	-0.0603547	-0.533735	0.0876186	0.193608	0.0400572	0.0481257	0.0113927	-0.047707	0.0401717	-0.234887	-0.0118394	-0.247549
TCGA-55-7910	0.219774	-0.172553	0.117452	-0.098316	-0.174514	0.0205311	-0.016304	0.0593427	-0.0526306	-0.0539929	-0.0361255	-0.0130276	-0.0742582	-0.533735	-0.0949732	0.197485	0.0280365	0.0691226	-0.00311223	-0.0286729	-0.055872	-0.0725298	0.0169493	-0.318707
TCGA-55-7911	0.257135	-0.179891	0.179206	0.0935476	0.000934777	-0.0359595	0.0258229	0.138724	-0.168763	-0.0644024	-0.127339	0.0128162	-0.0557952	-0.533735	0.127339	0.210647	0.0425995	0.069571	0.0121689	-0.0037709	0.071178	0.10464	0.0122444	-0.220076
TCGA-55-7913	-0.11141	-0.18846	0.119057	-0.122051	-0.131102	-0.0267511	0.00241063	0.0662973	-0.102721	-0.148956	0.00610207	-0.0565072	-0.0897314	-0.533735	-0.0986137	0.183032	-0.0304818	0.0782496	-0.0413808	-0.0191885	-0.0562963	-0.0385398	0.0237896	-0.317736
TCGA-55-7914	0.112222	-0.0843022	0.163021	-0.0388446	-0.16141	0.0226912	-0.0190678	0.146217	-0.137495	-0.084915	-0.0938525	-0.0556655	-0.0250702	-0.533735	0.0670835	0.20602	0.0489719	0.0346366	0.0380735	-0.0351274	0.0379723	-0.122636	-0.0279306	-0.33055
TCGA-55-7994	0.193344	-0.162939	0.156938	0.131549	0.0702832	-0.0564336	0.071161	0.213058	-0.151054	-0.136074	-0.113058	-0.00113448	-0.0853217	-0.533735	0.0525033	0.194151	0.0230906	0.0800533	-0.0155052	-0.0278146	-0.00567424	-0.0410732	-0.0159864	-0.273274
TCGA-55-7995	0.182013	-0.124196	0.140043	0.189659	-0.159675	-0.0359987	0.0909665	0.211031	-0.0996831	-0.0524768	-0.0723535	0.00527629	-0.0521364	-0.533735	0.109917	0.234535	0.00118877	0.063637	-0.0357147	-0.0765994	0.0295787	-0.100811	0.0358666	-0.309873
TCGA-55-8085	0.116909	-0.098966	0.142897	0.0709847	0.0259126	-0.0233257	0.0323078	0.159521	-0.159126	-0.0933787	-0.0608392	-0.0463973	-0.0721004	-0.533735	0.0591332	0.224012	-0.00595583	0.0321042	-0.0163437	-0.0712362	0.00662459	0.0149782	-0.0132624	-0.243763
TCGA-55-8087	0.0157933	-0.232544	0.14425	-0.142261	-0.0290376	-0.01688	0.11612	0.15321	0.00421032	-0.117892	-0.0666556	-0.0524354	-0.0391971	-0.533735	-0.127133	0.189334	0.0231168	0.0710307	0.0063364	-0.00540064	-0.0484011	0.112398	-0.117358	-0.34453
TCGA-55-8089	0.257301	-0.143873	0.166464	0.243598	0.0362162	-0.0487707	0.0828296	0.242322	-0.106839	-0.00281174	0.0591264	0.218044	-0.0512069	-0.533735	0.156963	0.216655	0.0183382	0.0608903	-0.028164	0.00572597	0.0757299	-0.115242	0.0334469	-0.258616
TCGA-55-8090	0.0964379	-0.225857	0.153479	-0.0783967	-0.0711026	-0.037704	0.10693	0.146616	-0.0480024	-0.0440551	0.0493159	-0.0546053	-0.0351181	-0.533735	-0.0560734	0.19514	0.000648144	0.0425273	-0.00523589	-0.027903	-0.00204873	-0.138724	-0.0440774	-0.320066
TCGA-55-8091	0.186938	-0.210795	0.138375	0.0382977	-0.0869276	0.0147251	0.146355	0.206568	-0.0160077	0.0600656	-0.0364206	0.0156434	-0.0163307	-0.533735	-0.0271912	0.186175	0.0196104	0.0269521	-0.0308659	-0.0069163	0.0490027	-0.112995	-0.046133	-0.288613
TCGA-55-8092	0.112522	-0.0791621	0.172608	0.100999	-0.144151	-0.0368309	0.0310515	0.105103	-0.130201	-0.144842	-0.0168438	0.0316338	-0.0610964	-0.533735	0.0577147	0.19634	0.0226874	0.0389587	-0.0539361	0.0655451	0.00949665	-0.13329	-0.040509	-0.253082
TCGA-55-8094	0.136452	-0.257433	0.147914	-0.20719	-0.189617	-0.0625352	-0.089845	0.0118175	-0.102644	-0.169087	0.00902725	-0.193517	-0.0642018	-0.533638	-0.151629	0.135383	-0.0372606	-0.00480151	-0.0259376	-0.0486887	-0.0400189	-0.0305538	-0.0192069	-0.374041
TCGA-55-8096	0.0359668	-0.141024	0.13567	-0.112387	-0.055563	-0.0115858	0.116782	0.266327	-0.0495742	-0.0762935	-0.0332589	-0.00299107	-0.0232096	-0.533735	-0.0766269	0.171553	-0.0152614	0.056695	-0.0397743	-0.0680817	0.0507136	-0.098019	-0.0456923	-0.350354
TCGA-55-8097	0.0277347	-0.178481	0.173749	-0.0354387	0.0895703	-0.0248058	0.12724	0.153703	0.0171203	-0.0877602	-0.0523621	-0.0619929	-0.00887268	-0.533735	0.0165177	0.187229	0.0251489	0.068844	0.0565348	-0.0369391	0.00343443	0.0409743	-0.0972814	-0.297059
TCGA-55-8203	0.139082	-0.0642388	0.167279	0.00282794	-0.0516695	-0.0343139	0.0461041	0.145161	-0.117851	-0.0816165	-0.035231	-0.0143802	-0.0640479	-0.533735	0.0446216	0.206785	0.00284544	0.04222	0.0125887	-0.0332892	-0.0254191	-0.0871482	-0.01014	-0.268421
TCGA-55-8204	0.174281	-0.151071	0.143298	-0.0474903	-0.157793	-0.0314235	0.0482558	0.0742309	-0.117389	-0.000669599	-0.00741363	0.0232126	-0.0371813	-0.533735	-0.0582063	0.183412	-0.0153785	0.00370156	-0.0614187	0.0220797	0.00737409	-0.15419	0.00583699	-0.311038
TCGA-55-8205	0.224879	-0.15019	0.138814	0.0938358	0.0343009	-0.0547441	0.0929697	0.21745	-0.158154	-0.0279635	-0.0794344	0.015984	-0.0595572	-0.533735	0.0827276	0.223924	-0.000781153	0.0817694	-0.0294709	-0.0148063	0.0656046	-0.0981744	0.00919839	-0.26745
TCGA-55-8206	0.0219654	-0.169296	0.159487	-0.0149457	0.159598	0.0405812	0.144633	0.218527	0.14436	0.0265341	-0.0556159	-0.0394791	-0.04548	-0.533735	-0.00776076	0.198688	0.0850847	0.0955894	-0.0101947	-0.0251506	0.00960408	0.0731412	-0.11929	-0.268129
TCGA-55-8207	0.0275315	-0.23461	0.182323	-0.0318905	0.0724652	0.0178313	0.129261	0.284723	0.0384888	-0.0358801	-0.0980875	-0.104228	-0.016963	-0.533735	-0.0276657	0.183574	0.0320996	0.0701547	-0.0170251	-0.00783762	0.0572902	-0.120904	-0.12172	-0.31696
TCGA-55-8208	0.23037	-0.0243654	0.151987	0.117567	0.0209627	-0.0380333	0.136932	0.260853	-0.0918267	0.0453283	-0.0862745	0.0265606	-0.0582785	-0.533735	0.131223	0.212062	-0.0106114	0.070636	-0.00943636	-0.0110512	0.0799039	-0.0877358	-0.012089	-0.210077
TCGA-55-8299	0.233946	-0.146585	0.158415	0.169797	0.0622362	-0.0234254	0.0971813	0.175863	-0.0450373	0.0502726	-0.0500211	0.0543212	-0.0356521	-0.533735	0.131666	0.198994	-0.00298694	0.0683655	0.00367706	-0.00229718	0.0626477	-0.0602639	-0.0112919	-0.258519
TCGA-55-8301	0.27553	-0.066243	0.155604	0.168793	0.0100191	-0.031932	0.0753746	0.225569	-0.165058	-0.108002	-0.0507549	0.0441442	-0.0452186	-0.533735	0.131077	0.221816	-0.00702607	0.060936	-0.0294039	-0.0169964	0.0401315	-0.133447	-0.0460927	-0.215901
TCGA-55-8302	0.194971	-0.203008	0.137809	-0.0251358	-0.138933	-0.0371324	0.0569046	0.142049	-0.12937	-0.0903278	-0.0346561	-0.016167	-0.0585085	-0.533735	-0.0753931	0.175638	-0.0358436	0.0880267	-0.0275135	-0.0465396	0.0118842	-0.0795056	-0.0509481	-0.316183
TCGA-55-8505	-0.0101647	-0.264732	0.0988059	-0.187842	-0.125075	-0.0229746	0.00989417	0.108816	-0.0959437	-0.0829151	-0.0882162	-0.0211631	-0.0321704	-0.533735	-0.209822	0.143696	-0.0676014	0.0142763	-0.10851	0.00587127	-0.0703237	-0.0882919	-0.035251	-0.395593
TCGA-55-8506	0.165275	-0.234979	0.143041	-0.030514	-0.15057	-0.0434553	0.0209365	0.142667	-0.0955134	-0.0668412	-0.111918	0.00867279	-0.0402595	-0.533735	-0.130865	0.179105	-0.0543386	0.0384845	-0.0273347	-0.051071	0.00953633	-0.0327428	-0.0113345	-0.285895
TCGA-55-8507	0.176278	-0.262945	0.143685	-0.106942	-0.167856	0.00286866	0.0686537	0.138309	-0.0728135	-0.0175523	-0.00849307	-0.0568483	-0.0459085	-0.533735	-0.125323	0.188359	-0.00712718	0.0453575	-0.0305808	-0.0699646	-0.0331054	-0.040239	-0.0345048	-0.365207
TCGA-55-8508	0.00822265	-0.0851176	0.160605	-0.0390318	-0.18407	-0.0336836	-0.0239789	0.0810915	-0.0755311	-0.0161281	-0.0469214	0.198356	-0.0352152	-0.533735	-0.0580548	0.155158	-0.0127033	0.0117477	0.00359051	-0.0806356	-0.0396006	-0.0376206	-0.0160653	-0.273954
TCGA-55-8510	0.147159	-0.16691	0.143588	0.0403679	0.0270279	-0.0292757	0.17906	0.246471	-0.0324548	-0.0132441	-0.0423921	0.0207065	-0.049386	-0.533735	0.0305435	0.18789	-0.0153379	0.0893442	-0.000151827	-0.0535459	0.0261468	-0.0173644	-0.0743489	-0.284535
TCGA-55-8511	0.125926	-0.119191	0.177492	0.0184512	-0.0786046	-0.0492605	0.0645307	0.121788	-0.151081	-0.0587	-0.00842005	0.0117187	-0.0640074	-0.533735	0.0138983	0.166481	0.00906863	0.0715124	-0.00263561	0.0281226	0.0277298	-0.0751863	-0.0138478	-0.193185
TCGA-55-8512	0.0753606	-0.268139	0.135067	-0.061775	-0.0944869	0.0102461	0.0536142	0.107634	-0.0847204	0.0574788	0.134016	-0.112551	-0.0144093	-0.533735	-0.132885	0.177214	0.0536377	0.0457805	-0.0761265	-0.0604237	0.00525677	-0.0491933	-0.103582	-0.47374
TCGA-55-8513	0.250552	-0.118648	0.148501	-0.0385641	-0.025052	-0.00226767	0.155466	0.267287	-0.0825946	0.0335794	0.068778	-0.0588552	-0.0350184	-0.533735	-0.05731	0.17526	-0.00037037	0.0494191	-0.0157205	-0.071897	-0.00715912	-0.000582154	-0.0806906	-0.334142
TCGA-55-8514	0.0686874	-0.236839	0.167216	-0.072375	-0.0796453	-0.00850507	0.0633426	0.16416	-0.132622	-0.0677076	-0.0380346	-0.0119221	-0.050245	-0.533735	-0.143789	0.140562	-0.0236029	0.011667	-0.0134858	-0.0819621	-0.00482606	0.0448005	-0.0946101	-0.300068
TCGA-55-8614	0.132755	-0.210723	0.142729	-0.0381895	-0.166327	-0.0186618	0.0902876	0.0997495	-0.134867	-0.0645931	-0.00558606	-0.0226973	0.00580381	-0.533735	-0.062023	0.189792	0.0143297	0.0256294	-0.0464081	-0.0770835	-0.0118076	-0.210005	-0.00659959	-0.298418
TCGA-55-8615	0.058533	-0.259248	0.139803	-0.150827	-0.0905734	-0.0184459	-0.00643217	0.107095	-0.102002	-0.098428	0.0588263	-0.0545705	-0.0444671	-0.533735	-0.133302	0.166183	-0.0154238	0.0588203	0.0204023	-0.0402972	-0.03962	0.0423506	-0.0249009	-0.376371
TCGA-55-8616	-0.0276825	-0.129628	0.183419	-0.0413583	-0.116952	-0.04677	0.0248569	0.116354	-0.114934	-0.13201	-0.00965605	-0.0951493	-0.0535209	-0.533735	-0.0387596	0.157564	-0.00667314	0.0508379	0.0261487	-0.0298888	-0.0519261	-0.0151473	-0.0756416	-0.387147
TCGA-55-8619	0.141736	-0.0653665	0.168578	0.124561	0.00101011	-0.0239323	0.15235	0.222179	-0.0229733	0.0659203	0.0475207	-0.0145868	-0.025043	-0.533735	0.0884693	0.185255	-0.00322098	0.059032	-0.017846	0.00500983	0.0261191	-0.0823669	-0.0443358	-0.271333
TCGA-55-8620	0.0588361	-0.126401	0.130615	-0.024165	-0.187137	-0.0109009	0.0459225	0.0947985	-0.0558154	-0.1393	0.100662	-0.0874672	-0.0222108	-0.533735	-0.0236953	0.220727	0.00349324	0.0201208	0.0109712	-0.0433804	-0.0346211	-0.170677	0.0286223	-0.303369
TCGA-55-8621	0.214798	-0.165317	0.156116	0.160704	0.0443817	-0.0270165	0.144471	0.266246	0.025134	0.030804	0.0152824	-0.0120903	-0.0125002	-0.533735	0.046696	0.190674	0.000816063	0.0903713	-0.032059	0.0633384	0.033852	-0.0532549	-0.0565016	-0.285895
TCGA-55-A48X	0.0904007	0.0300479	0.177045	0.0809911	-0.05109	-0.0386904	0.0730878	0.114064	-0.10359	-0.056172	-0.0226589	-0.0185119	-0.0501678	-0.533735	0.0779859	0.201087	0.0348312	0.0604362	0.0310588	-0.0751844	0.0151114	-0.0697631	-0.0657473	-0.290748
TCGA-55-A48Y	0.00930461	-0.174438	0.128544	-0.0796142	-0.0219097	-0.00877453	0.0462805	0.142435	-0.0976106	-0.0729818	-0.0872115	-0.0508337	-0.0291356	-0.533735	-0.03532	0.182686	-0.0253791	0.0401192	-0.0738957	-0.0234059	-0.012772	-0.0634349	-0.0177716	-0.280944
TCGA-55-A48Z	0.147277	-0.157897	0.153291	0.0065361	-0.0612793	-0.0467956	0.0463899	0.192206	-0.105719	-0.107478	-0.0269329	-0.0222529	-0.0355776	-0.533735	-0.0443735	0.168537	-0.0165096	0.0626913	-0.00273474	-0.0836547	0.029133	-0.10871	-0.0089612	-0.266576
TCGA-55-A490	-0.0962052	-0.231417	0.15698	-0.0821537	-0.0541575	-0.029195	0.0694675	0.192212	-0.13989	-0.110524	-0.0750968	-0.0839435	-0.01718	-0.533735	-0.0492477	0.138168	-0.029375	0.0485242	-0.0391084	-0.0783675	-0.0185741	0.141035	-0.0422519	-0.211242
TCGA-55-A491	0.0563028	-0.0895783	0.106905	-0.0342356	-0.13389	-0.0713205	0.0361764	0.21304	-0.0729271	-0.0472568	-0.0885863	9.99e-05	-0.0365926	-0.533735	-0.0176395	0.147158	-0.0581207	0.0390579	0.00819966	-0.049215	0.00324997	-0.11103	-0.0536493	-0.29502
TCGA-55-A492	0.0520525	-0.194196	0.142607	-0.0111999	-0.0130267	-0.0427968	0.0427763	0.104723	-0.0480449	-0.0970375	-0.0102073	-0.109665	-0.0608483	-0.533735	-0.0304383	0.190605	-0.0214076	0.0737809	-0.0595597	-0.0758026	-0.0205644	0.0886608	-0.105137	-0.409086
TCGA-55-A493	0.0945282	-0.141644	0.140053	0.0886361	0.0543892	-0.054105	0.0829392	0.200216	-0.169113	-0.0939468	-0.0963247	0.065051	-0.0241517	-0.533735	0.0586043	0.175579	-0.0242466	0.0703334	-0.0411831	-0.0791625	0.0817719	-0.117286	0.00671101	-0.242404
TCGA-55-A494	-0.0303923	-0.269643	0.189345	-0.106196	-0.128396	-0.0298247	-0.0580092	-0.0442304	-0.129755	-0.124769	0.0152953	-0.126795	-0.0389908	-0.533735	-0.0758097	0.197839	0.0135683	0.111081	0.0257293	-0.066922	-0.0531532	-0.0272719	-0.0192032	-0.419183
TCGA-55-A4DF	0.248684	-0.0969598	0.158629	0.0545744	-0.111663	-0.00438136	0.006201	0.186277	-0.156293	-0.114559	-0.126233	-0.0853128	-0.0604369	-0.533735	0.0690785	0.227969	0.0473182	0.0631398	-0.00260119	-0.0246453	0.0149069	-0.163829	0.0507996	-0.333754
TCGA-55-A4DG	0.00309513	-0.0473865	0.169835	-0.0566393	-0.113766	-0.0431985	0.0623963	0.124114	-0.0441861	-0.118614	-0.0551997	-0.111946	-0.0539907	-0.533735	0.00108546	0.195787	0.0837478	0.0891642	0.0516462	0.0453116	0.00122517	-0.0150135	-0.0810684	-0.403262
TCGA-55-A57B	0.0727952	-0.2304	0.124113	-0.0796618	0.0276932	-0.00884697	0.147688	0.149453	-0.0589702	-0.0739517	-0.0976719	-0.0535687	-0.0425424	-0.533735	-0.0691433	0.17329	0.00722912	0.0684156	-0.039974	-0.00603672	0.0444773	0.00711314	-0.0999233	-0.261528
TCGA-62-8394	0.264798	-0.210987	0.111187	-0.0667166	-0.0879547	-0.0422463	0.0278369	0.125014	-0.124366	-0.109625	-0.0617452	-0.0767124	-0.0275664	-0.533735	-0.059616	0.219905	-0.0369944	0.0130736	-0.0283207	-0.0640253	0.0104879	0.0476696	-0.00900993	-0.303077
TCGA-62-8395	0.00711134	-0.204193	0.153844	-0.0391116	-0.0788041	-0.027404	0.11019	0.175367	-0.0656235	-0.0604505	-0.0471159	-0.0467642	-0.0394073	-0.533735	-0.0713303	0.186523	-0.00149592	0.0528635	-0.00786865	-0.010841	-0.0364635	-0.00444676	-0.0828829	-0.358218
TCGA-62-8397	-0.00168187	-0.168911	0.176921	-0.114705	0.0862611	-0.00521017	0.0995552	0.138891	0.000386172	-0.0532987	-0.0136505	-0.0805238	-0.0293192	-0.533735	-0.0822249	0.206458	-0.0147286	0.0776684	-0.038077	-0.0610831	-0.0149363	0.0421203	-0.0954978	-0.326959
TCGA-62-8398	0.211236	-0.238239	0.130261	-0.0682382	-0.136165	-0.0154874	0.0537648	0.116387	-0.0801688	-0.0193084	0.0421536	0.0273945	-0.0593213	-0.533735	-0.0611934	0.184999	-0.0241652	0.0400637	-0.0859044	-0.00753145	-0.00549373	-0.0221144	-0.00909148	-0.251141
TCGA-62-8399	0.147921	-0.276826	0.17971	-0.0566956	-0.162413	0.0555879	0.0343398	0.11468	-0.0692432	-0.0425355	0.0302821	-0.0821086	-0.0123937	-0.533735	-0.148746	0.140607	0.00488437	0.0259232	-0.0294118	-0.0161115	0.0311547	-0.249958	-0.0584493	-0.36812
TCGA-62-8402	0.25174	-0.234417	0.155478	0.0993547	-0.0776521	-0.0616504	-0.00767419	0.110359	-0.163273	-0.0736154	-0.0169443	-0.00289217	-0.0781104	-0.533735	0.128886	0.230988	-0.0106915	0.0738079	-0.0420042	-0.0687905	0.0673267	-0.00339689	-0.0348426	-0.193088
TCGA-62-A46O	0.119525	-0.165881	0.108686	-0.160325	-0.201664	-0.0518687	-0.0418223	-0.0180384	-0.145965	-0.177444	-0.131819	-0.0710693	-0.0816849	-0.533638	-0.193098	0.21759	-0.00151406	0.0260296	-0.094162	0.00263829	-0.10301	-0.0925229	0.079766	-0.423066
TCGA-62-A46P	0.105528	-0.244026	0.133757	-0.061097	-0.0806383	-0.03991	0.0550309	0.0627558	-0.0931433	-0.0759509	-0.0249934	-0.0740273	-0.0419585	-0.533735	-0.106603	0.156395	-0.0192247	0.0498079	-0.0353624	-0.0755364	-0.0532961	0.0296403	-0.0740292	-0.370547
TCGA-62-A46R	0.1082	-0.145936	0.165396	-0.0128354	0.18376	-0.0226316	0.0621688	0.191161	-0.00259536	-0.0868029	-0.124603	-0.0861278	-0.0872682	-0.533735	0.0284678	0.221992	0.022635	0.103811	0.00372498	-0.0206124	0.0125064	-0.0263883	-0.0473435	-0.241336
TCGA-62-A46S	0.137153	-0.187685	0.156127	-0.00129431	-0.0958262	-0.00563162	0.0634397	0.11616	-0.0903724	-0.0928259	0.0201531	-0.050468	-0.0597849	-0.533735	-0.0257032	0.174018	0.0286789	0.0569042	-0.0570202	-0.00752907	0.00496141	-0.0666363	-0.0471248	-0.35317
TCGA-62-A46U	0.25085	-0.15835	0.135867	0.114364	0.137625	-0.0407133	0.0860627	0.276996	-0.142028	-0.0357953	-0.0659988	0.0418954	-0.0837286	-0.533735	0.14857	0.217641	0.00663919	0.0685955	0.0288777	-0.0368987	0.103413	0.00391411	0.0328332	-0.148626
TCGA-62-A46V	0.0722408	-0.252003	0.114072	-0.202054	0.021195	0.0118008	0.0446734	0.164385	-0.066453	-0.0716228	-0.13706	-0.130835	-0.012281	-0.533735	-0.180159	0.177582	0.00450873	0.0425701	-0.00833107	-0.00677214	-0.0193887	-0.0123621	-0.052005	-0.31628
TCGA-62-A46Y	0.201664	-0.168111	0.147832	-0.0352879	-0.0199354	-0.0305681	0.12569	0.198572	-0.0640489	-0.0320274	-0.0432755	-0.114674	-0.0585314	-0.533735	0.0142625	0.192671	0.0172946	0.031977	-0.0136899	-0.0533198	0.0120753	-0.0193594	-0.0461202	-0.298515
TCGA-62-A470	0.085933	-0.214766	0.125289	-0.150884	-0.0669203	-0.00921304	0.0666274	0.200399	-0.0853296	-0.110731	0.0226878	-0.181415	-0.0715035	-0.533735	-0.154002	0.194373	-0.00139977	0.0486211	-0.0450601	-0.031432	0.00453767	0.0227894	-0.0336523	-0.413843
TCGA-62-A471	0.184393	-0.240291	0.134144	-0.0446309	-0.236623	-0.048833	-0.0129499	0.0289487	-0.134604	-0.0697902	-0.00447423	0.0131315	-0.0787066	-0.533735	-0.111271	0.185646	-0.0440906	0.0196005	-0.0420229	-0.00343752	-0.0612049	-0.0829641	0.0298556	-0.363072
TCGA-62-A472	0.149443	-0.199522	0.150442	0.0231596	-0.122926	-0.0228092	0.0476184	0.163953	-0.0516807	-0.154964	-0.0906304	-0.0719604	-0.0723361	-0.533735	0.0355424	0.197977	0.0236242	0.0796462	0.00629373	-0.0363826	-0.0234832	-0.147147	-0.0352145	-0.323173
TCGA-64-1676	0.0400525	-0.17601	0.16228	0.0664703	-0.00529402	-0.0295669	0.120732	0.251174	-0.126753	-0.00863667	-0.0803366	-0.0211817	-0.0574123	-0.533735	0.000730943	0.174389	-0.0160419	0.0250582	-0.0458834	0.00212398	0.0402395	-0.022402	-0.0104189	-0.310941
TCGA-64-1677	0.165585	-0.0764322	0.160334	0.0526083	-0.116469	-0.0535998	0.0259267	0.0918273	-0.173047	-0.1369	-0.0696362	-0.00978709	-0.0959144	-0.533735	0.0615252	0.212656	-0.0150487	0.0165911	-0.00397563	-0.0302012	-0.00488942	-0.192796	0.00836766	-0.312591
TCGA-64-1678	-0.0384108	-0.124252	0.152048	-0.055496	-0.213388	-0.0275525	-0.00719331	0.0523955	-0.0821458	-0.188399	-0.0734224	-0.0110668	-0.0721498	-0.533638	-0.0314553	0.229207	-0.0342508	0.00833351	-0.0505268	-0.00408126	-0.0623243	-0.193297	0.0575289	-0.449277
TCGA-64-1679	0.109215	-0.222074	0.101627	-0.182935	-0.0284763	-0.0289883	0.124621	0.224399	-0.0726346	-0.0364527	-0.0259959	-0.0469507	-0.0136503	-0.533735	-0.154658	0.154547	-0.0489461	0.0269889	-0.0461303	0.0196293	0.0552651	-0.0401149	-0.0204935	-0.325988
TCGA-64-1680	0.156481	-0.212965	0.182965	-0.0797072	-0.187135	-0.00218195	0.0134282	0.0892426	-0.0535049	-0.0826302	-0.0869123	-0.131532	-0.0349943	-0.533735	-0.0688352	0.191385	-0.00545124	0.0164922	-0.0164929	-0.0479989	-0.00801489	-0.046828	-0.0421862	-0.415688
TCGA-64-1681	0.305384	-0.148202	0.14533	-0.0383308	0.0687385	0.00767548	0.138261	0.169002	-0.072179	-0.0553326	-0.0153271	-0.101415	-0.0576182	-0.533735	-0.0512865	0.174249	-0.0131161	0.0102209	0.0299183	-0.0608473	0.0423402	-0.0664658	-0.0795205	-0.301233
TCGA-64-5774	0.0109777	-0.122795	0.145302	-0.108756	-0.164617	-0.00259758	-0.0400655	0.0215196	-0.128997	-0.104367	-0.00651036	-0.0662265	-0.0247377	-0.533735	-0.0865404	0.170283	-0.0225203	0.0185967	-0.00627708	-0.0591432	-0.0565152	-0.0911985	0.0470762	-0.28473
TCGA-64-5775	-0.0804607	-0.259503	0.155746	-0.171653	-0.0707238	-0.0292632	0.0455206	0.193194	-0.166321	-0.04293	-0.0792418	-0.0894791	0.00481667	-0.533735	-0.146218	0.186421	-0.052882	0.0612343	-0.088728	-0.0535612	0.0586514	-0.255485	0.021019	-0.313659
TCGA-64-5778	0.219911	-0.0332989	0.200722	0.16342	-0.0590652	-0.0580146	0.057988	0.188967	-0.155315	-0.162843	-0.0537873	-0.0127291	-0.0645519	-0.533735	0.157373	0.209687	-0.0090745	0.0515846	0.0245826	-0.0321429	0.0691496	-0.0373052	-0.0234278	-0.18571
TCGA-64-5779	0.0532568	-0.00673254	0.186122	0.0073444	-0.154068	-0.0219744	-0.0708033	0.0934038	-0.120559	-0.104842	-0.0439626	-0.0360471	-0.0421574	-0.533735	0.060703	0.202655	0.0234032	0.0666716	-0.0187627	-0.049857	0.0416368	-0.121544	0.0106704	-0.227939
TCGA-64-5781	0.043461	-0.193899	0.209398	0.208685	-0.103912	-0.0618805	-0.00756569	0.0994129	-0.117739	-0.107636	-0.0377487	0.0259128	-0.0308048	-0.533735	0.0964745	0.179525	-0.0679119	-0.0304382	-0.0429087	0.000877907	0.0377108	-0.146945	-0.0282029	-0.259975
TCGA-64-5815	0.129812	-0.227421	0.164755	-0.0574294	0.115399	-0.0365615	0.128667	0.266669	-0.0622185	-0.0397295	-0.101695	-0.0268217	-0.00953547	-0.533735	0.00868732	0.159328	-0.06657	0.0326965	-0.00573421	0.0257505	0.050921	-0.0380379	-0.0463075	-0.18406
TCGA-67-3770	0.139788	-0.181662	0.174116	0.078702	0.0702732	-0.0182177	0.1135	0.259902	-0.0660688	-0.0923677	-0.0114923	-0.0868012	-0.0621425	-0.533735	0.0628645	0.204955	-0.0422503	0.0280639	-0.00367388	-0.0711226	0.0458662	-0.104815	-0.0672188	-0.336569
TCGA-67-3771	0.155087	-0.162839	0.13987	0.0255136	-0.10346	-0.0114666	0.0845749	0.205298	-0.111043	-0.00941629	-0.148905	-0.0506401	-0.0415051	-0.533735	0.00849789	0.187509	-0.0134737	0.0877552	-0.0460377	0.00986721	0.0114633	-0.0260592	-0.0312273	-0.309679
TCGA-67-3772	0.11105	-0.0949145	0.159283	6.08e-05	0.180501	-0.025425	0.155458	0.200643	-0.0346318	-0.0536318	-0.101428	-0.0633835	-0.0655729	-0.533735	0.0453964	0.190742	-0.0398707	0.0111684	0.00355895	0.0181782	0.0348017	-0.145777	-0.0815452	-0.317154
TCGA-67-3773	0.137604	-0.154434	0.167554	0.0667136	0.0351326	-0.00333588	0.14888	0.202628	0.0357322	-0.0428211	-0.0666827	-0.0680165	-0.0524868	-0.533735	0.0735854	0.20363	-0.026011	0.0206999	0.0175932	-0.00389007	0.0192368	-0.0660328	-0.0473636	-0.266964
TCGA-67-3774	0.230554	-0.172973	0.192729	0.0870443	-0.0046857	-0.00252911	0.0787999	0.200076	-0.0249981	-0.0448866	0.0598113	-0.0316921	-0.0609214	-0.533735	0.0695567	0.210074	-0.00656812	0.0874611	-0.00451011	0.00536362	0.0368932	0.0254468	-0.058509	-0.33123
TCGA-67-4679	0.0712217	-0.208542	0.183519	-0.0369912	0.00167994	0.0166539	0.130707	0.210952	0.144046	-0.00952326	-0.10383	-0.0801411	-0.0632594	-0.533735	-0.0489967	0.17162	0.0313679	0.0388923	0.01456	-0.0104875	-0.00736846	-0.00635989	-0.0874122	-0.354335
TCGA-67-6215	0.0755635	-0.228928	0.145301	-0.163954	-0.0667917	-0.0356465	0.0812214	0.170157	-0.0578686	-0.0416233	-0.0594086	-0.0780394	-0.0314902	-0.533735	-0.123522	0.190171	0.0292015	0.054688	-0.0279549	-0.0251845	-0.066391	0.0279326	-0.023403	-0.311329
TCGA-67-6216	0.161176	-0.100389	0.162266	-0.0288589	-0.0385301	-0.00769426	0.0858362	0.187996	-0.0500667	-0.0357276	-0.0369559	-0.080832	-0.0362056	-0.533735	0.0137513	0.186123	0.000148064	0.0630555	0.00431531	-0.0412142	0.0117143	-0.0248141	-0.0456752	-0.298612
TCGA-67-6217	0.136257	-0.0718754	0.179583	0.0113497	0.100191	-0.00339948	0.128011	0.18195	-0.0887157	-0.110085	-0.0198957	-0.0256299	-0.0571742	-0.533735	0.0693586	0.181805	0.0343817	0.0604336	0.0155518	0.00402316	0.0321137	-0.00598782	-0.0973329	-0.259684
TCGA-69-7760	0.195037	-0.195808	0.154707	-0.166391	-0.056181	0.0417992	-0.0268197	0.114113	-0.114516	-0.143943	-0.079873	-0.0919131	-0.0467982	-0.533735	-0.0768339	0.180704	-0.0122574	0.0299188	-0.0262715	-0.0487414	-0.00975755	-0.251079	-0.0258666	-0.351228
TCGA-69-7761	0.272643	-0.0969842	0.171384	0.0562146	-0.0531116	0.0178319	0.0430204	0.197183	-0.0350452	-0.0663948	-0.0469379	0.0514586	-0.0585216	-0.533735	0.143808	0.210313	0.0489977	0.0688446	-0.0402246	-0.0067	0.0393183	-0.129004	-0.0231863	-0.185419
TCGA-69-7763	0.133901	-0.20347	0.188584	-0.0453383	-0.0614278	-0.011346	0.0560111	0.154907	-0.0677398	-0.0741614	0.0217829	-0.0457204	-0.0276757	-0.533735	-0.0348777	0.186365	-0.00401567	0.0585252	-0.0738296	0.0654901	0.0115646	0.0631623	-0.0854775	-0.353267
TCGA-69-7764	0.185794	-0.171902	0.182029	0.0285735	-0.0950643	-0.0324645	0.00362588	0.0764041	-0.0935149	-0.150599	-0.0520848	-0.11032	-0.0627025	-0.533735	0.0153786	0.174982	0.0629336	0.0486918	-0.00172076	-0.0369276	-0.0120158	-0.0509331	-0.049692	-0.312785
TCGA-69-7765	0.118746	-0.15572	0.164469	0.00925998	-0.0436667	-0.00908822	0.0860688	0.175612	-0.107545	-0.0597224	-0.156995	-0.0260591	-0.0543217	-0.533735	0.0326007	0.207551	0.0103749	0.0625428	0.000138896	0.0152727	0.0506939	-0.00827017	-0.0434732	-0.277449
TCGA-69-7973	0.1057	-0.141457	0.130342	-0.0906322	-0.121117	-0.00183098	0.000918845	0.0801909	-0.0292439	-0.0660481	-0.02057	-0.0216871	-0.0510471	-0.533735	-0.0471989	0.18293	-0.00441164	0.0294912	-0.00232405	-0.0360136	-0.0436099	-0.0701321	0.0751617	-0.321522
TCGA-69-7974	0.171837	-0.184242	0.138661	0.0130033	0.019413	-0.038167	0.109442	0.1998	-0.0719037	-0.0295964	-0.0377417	0.0172796	-0.0659798	-0.533735	-0.0374824	0.170037	0.0108369	0.0766011	-0.0295592	-0.0341091	0.0465029	-0.0792823	-0.00944356	-0.272886
TCGA-69-7978	0.18689	-0.156079	0.1695	0.10124	0.0493849	-0.0394737	0.113741	0.255443	-0.0978002	-0.0490159	-0.0759213	0.0534042	-0.0257612	-0.533735	0.123448	0.200903	-0.000721333	0.053285	-0.0178986	-0.0172298	0.0719335	-0.0379037	-0.0237419	-0.16212
TCGA-69-7979	0.109507	-0.257421	0.127395	-0.0963816	-0.249116	-0.0400964	0.00597407	0.0718922	-0.107739	-0.135967	-0.0585073	-0.0724562	-0.0255677	-0.533735	-0.180143	0.176541	-0.0296296	0.0198117	-0.028898	-0.02864	-0.0708903	-0.030677	-0.0437	-0.381905
TCGA-69-7980	0.160548	-0.211222	0.179545	0.0698963	-0.0993131	-0.0155488	0.0604571	0.183896	-0.115617	-0.1095	0.0402169	-0.00158975	-0.0285576	-0.533735	0.00406601	0.191972	-0.00535388	0.0394644	0.0164158	-0.053221	0.0211474	-0.0224742	-0.0647015	-0.281235
TCGA-69-8253	0.0563921	-0.18128	0.166317	-0.0356879	-0.046278	-0.00755585	0.0901465	0.103083	-0.0666139	-0.0504857	-0.0535482	-0.0872502	-0.0569118	-0.533735	-0.0811314	0.178335	-0.00263008	0.030469	-0.0160732	-0.0430774	-0.000722915	0.0636396	-0.07611	-0.329094
TCGA-69-8254	0.19091	-0.118215	0.161973	0.0221419	0.0160118	0.0223162	0.0768082	0.127382	-0.0675193	-0.0714684	0.072547	-0.0678729	-0.0484448	-0.533735	0.0629221	0.165895	0.0122659	0.0254522	-0.0146451	-0.0447886	0.0411482	0.00920461	-0.0581728	-0.285895
TCGA-69-8255	0.214775	-0.0998752	0.158018	0.152154	-0.135994	-0.0834078	0.0113181	0.0886103	-0.211326	-0.113362	-0.0999945	-0.0219031	-0.0881695	-0.533735	0.104371	0.189033	-0.0116798	0.0254173	-0.0339452	-0.00921572	-0.0107678	-0.232555	0.0130705	-0.251141
TCGA-69-8453	0.21124	-0.177192	0.171069	0.11079	0.0988658	-0.00131067	0.176171	0.28721	-0.0283494	0.0098434	0.115778	-0.0625822	-0.043286	-0.533735	0.0711274	0.170578	-0.0191544	0.0266829	-0.025278	-0.0406997	0.0380484	-0.062035	-0.0323632	-0.272401
TCGA-69-A59K	0.17883	-0.150047	0.169553	-0.0586636	-0.108266	0.00991898	0.0639711	0.193496	-0.129768	-0.115469	-0.0992595	-0.0408569	-0.0079375	-0.533735	-0.0283588	0.215806	-0.0029224	0.0473492	-0.0203543	-0.0386165	0.0246033	-0.188982	-0.021639	-0.274828
TCGA-71-6725	0.121306	-0.254478	0.164796	-0.112704	-0.161551	-0.0379977	0.020719	0.0467307	-0.181077	-0.0991694	-0.0043641	-0.111573	-0.0433953	-0.533735	-0.191605	0.177865	-0.0128404	0.0407881	-0.0606817	-0.0015206	-0.0629016	-0.11078	-0.050936	-0.493447
TCGA-71-8520	0.168228	-0.252254	0.113661	-0.147198	-0.0397671	-0.0116994	0.0261086	0.140741	-0.115155	-0.0350801	-0.0429605	-0.0534883	-0.0194542	-0.533735	-0.155608	0.172577	-0.0265931	0.0355168	0.0322172	-0.0746925	-0.00105989	0.0107729	-0.0512385	-0.302883
TCGA-73-4658	0.124162	-0.229815	0.169462	0.0363434	0.0761563	-0.0150926	0.1433	0.228474	-0.0520697	0.00595406	-0.0379266	-0.00797007	-0.017348	-0.533735	0.0505165	0.171538	-0.0436918	0.0569516	-0.0251528	0.0372924	0.0646486	-0.0734521	-0.0307445	-0.19833
TCGA-73-4659	0.101522	-0.246456	0.135069	-0.0705854	-0.0422639	-0.00772	0.113219	0.215531	-0.0562991	0.0169249	-0.0484928	-0.103454	-0.064744	-0.533735	-0.14319	0.169653	-0.020201	0.041317	-0.0465329	-0.0129208	-0.0343076	-0.0160569	0.0377686	-0.349675
TCGA-73-4662	0.0963014	-0.111747	0.177466	0.0131022	0.108476	-0.0302825	0.0731592	0.211514	-0.0763867	-0.129447	-0.0695644	-0.109759	-0.0550425	-0.533735	0.0499801	0.195803	0.000503666	0.0676836	0.0372367	-0.0116062	0.0455714	0.0197555	-0.0589879	-0.210174
TCGA-73-4666	0.240299	-0.237462	0.162244	0.135187	0.016912	-0.0492622	0.0810083	0.193715	-0.136632	-0.0650229	-0.130271	-0.00719669	-0.067865	-0.533735	0.0855587	0.22878	-0.023533	0.0408448	-0.0418867	-0.0581523	0.024768	-0.0598553	0.0500865	-0.229395
TCGA-73-4668	0.0649565	-0.236591	0.173489	-0.0871908	-0.140085	-0.027275	0.0897423	0.146175	-0.0866005	-0.0836529	-0.0923747	-0.0677413	-0.0440335	-0.533735	-0.141904	0.156621	0.0098546	0.043256	-0.0203794	0.0297382	-0.0043323	-0.0700002	-0.0224105	-0.343753
TCGA-73-4670	-0.0413913	-0.204956	0.137607	-0.113607	-0.0517507	-0.049591	0.0049002	0.14058	-0.140459	-0.0103538	-0.042944	-0.063982	-0.0683994	-0.533735	-0.176657	0.18937	-0.0615899	0.0176263	-0.0709648	0.0320978	-0.0682114	-0.0285032	-0.0181981	-0.366469
TCGA-73-4675	-0.0323937	-0.253286	0.153304	-0.129564	0.061043	-0.0116198	0.12485	0.205516	-0.102313	-0.108199	-0.0507332	-0.0543708	-0.0152219	-0.533735	-0.152181	0.144159	-0.0464042	0.00345868	-0.106903	-0.0678688	-0.0607521	0.11805	-0.0887846	-0.281914
TCGA-73-4676	0.0310574	-0.192073	0.14379	-0.151294	-0.115316	-0.0378092	0.0765365	0.193494	-0.0414972	-0.0385535	-0.150284	-0.0988952	-0.0697642	-0.533735	-0.12438	0.14385	-0.0572346	0.00739734	-0.0418493	-0.025421	0.00973398	-0.106864	0.0355872	-0.37375
TCGA-73-4677	0.058508	-0.202057	0.189329	-0.0215627	-0.00614121	-0.0077156	0.124182	0.153481	-0.0270468	-0.0480049	-0.0263679	-0.0866821	-0.0666217	-0.533735	-0.0092188	0.193007	0.0027299	0.0576625	-0.039829	0.010228	0.00777557	0.0742224	-0.0896589	-0.281235
TCGA-73-7498	0.0503191	-0.19326	0.180458	-0.0136714	-0.00354286	-0.0431942	0.0692034	0.14076	-0.0128607	-0.0690659	-0.0649743	-0.0504426	-0.0290413	-0.533735	0.0108953	0.199297	0.00169654	0.0960162	-0.01036	-0.00219297	-0.0283691	0.0984881	-0.116845	-0.301718
TCGA-73-7499	0.217711	-0.120044	0.157412	0.103874	-0.0176958	-0.0602844	0.0421823	0.162183	-0.125427	-0.124261	-0.0198876	-0.0437995	-0.0595878	-0.533735	0.135295	0.21325	-0.0354595	-0.0128481	-0.000612002	-0.0556122	0.0143591	-0.106248	0.0103152	-0.214057
TCGA-73-A9RS	0.0764857	-0.238733	0.158801	-0.100354	-0.233913	-0.0453987	-0.0616381	0.0325967	-0.106378	-0.154778	0.00496155	-0.0994784	-0.0683595	-0.533735	-0.0779159	0.211167	-0.011608	0.00922733	-0.0563651	0.0462542	-0.074214	0.0296358	0.0178149	-0.320551
TCGA-75-5125	0.247163	-0.193778	0.134186	0.0475577	0.0412518	-0.0426087	0.070413	0.200904	-0.121029	-0.0513511	-0.184102	-0.0465344	-0.0294506	-0.533735	0.0282795	0.201616	0.000105408	0.0942996	-0.0325553	-0.015795	0.0176945	-0.107607	0.0232972	-0.216193
TCGA-75-5146	0.138014	-0.0978823	0.175017	0.0125792	-0.0520932	-0.0542237	0.0755855	0.143123	-0.0793814	-0.134032	-0.0709553	-0.112103	-0.0837439	-0.533735	0.0776674	0.209911	-0.00721431	0.0249095	-0.01832	0.0432389	0.00320795	-0.0600905	-0.0578534	-0.343171
TCGA-75-5147	0.113478	-0.0895213	0.138103	-0.0431463	0.0570181	-0.0379209	0.0790925	0.203442	-0.0756318	-0.0796813	-0.095978	-0.0621547	-0.0535961	-0.533735	0.0236523	0.179808	-0.0530181	0.0229666	-0.0193028	-0.00728586	0.0262259	-0.201013	-0.00225587	-0.277158
TCGA-75-6206	0.111406	-0.252797	0.158643	-0.107983	0.0704688	0.000540007	0.063355	0.220066	-0.0943273	-0.0829218	-0.0683577	-0.0382296	-0.0273816	-0.533735	-0.0874519	0.17551	0.0493948	0.0530792	-0.0465679	0.00807257	0.0383032	0.109079	-0.100346	-0.315503
TCGA-75-6212	0.104821	0.00483101	0.150816	-0.0478365	0.11509	0.000979689	0.179805	0.192995	0.056935	-0.0126299	-0.100801	-0.0642932	-0.0453341	-0.533735	-0.000666953	0.190656	1.77e-05	0.0497854	0.043953	-0.0754515	0.022491	0.0306839	-0.0508324	-0.242307
TCGA-75-6214	0.105664	-0.258147	0.136763	-0.159648	-0.261593	-0.0576053	-0.0141665	0.0730764	-0.196698	-0.0457694	-0.0593051	-0.0541292	-0.0430511	-0.533735	-0.161472	0.200572	-0.00526486	0.0784413	-0.0933223	0.108883	-0.00104379	-0.142938	-0.0228388	-0.37443
TCGA-75-7025	0.221669	-0.0947783	0.165533	-0.00800558	0.0653694	0.0119653	0.128224	0.194808	-0.0229632	-0.0444431	-0.0180299	-0.0577398	-0.00330486	-0.533735	0.0192654	0.195803	0.067862	0.0669447	0.037226	-0.050758	0.0342462	-0.0682904	-0.106399	-0.323075
TCGA-75-7027	0.0114131	-0.257598	0.135342	-0.0978405	-0.150129	0.0037388	-0.0487732	0.0833397	-0.0762863	-0.0965058	-0.0126248	-0.0286243	-0.035051	-0.533735	-0.115014	0.194406	0.000821112	0.0356899	-0.0797342	-0.0016905	-0.0358716	-0.0930228	0.0189022	-0.289681
TCGA-78-7143	0.243244	-0.176605	0.13473	-0.0936307	0.00332056	-0.0316363	0.0947972	0.172742	-0.0970745	-0.125681	0.0436058	-0.150537	-0.0685059	-0.533735	-0.0419061	0.214279	0.0258232	0.0519006	-0.00254165	-0.0465045	-0.00900926	-0.088337	0.00540858	-0.261625
TCGA-78-7145	0.153574	-0.242749	0.131309	-0.170708	0.0738724	-0.00833442	0.08106	0.199987	-0.0581032	-0.0608819	-0.0824193	-0.0662984	-0.0265129	-0.533735	-0.111183	0.158639	0.00422052	0.035015	-0.0298653	-0.0134467	0.0367487	-0.0998462	-0.015363	-0.307834
TCGA-78-7146	0.0798674	-0.225183	0.121577	-0.0899685	-0.0347113	-0.0299114	0.021553	0.140395	-0.154857	-0.132888	-0.141411	-0.0428987	-0.0451433	-0.533735	-0.102953	0.205102	-0.0102932	0.00647025	-0.0763302	0.0109964	-0.0148572	-0.0285702	0.0243959	-0.312106
TCGA-78-7147	0.254735	-0.204908	0.127315	-0.0520414	-0.0955332	-0.0219976	0.021707	0.122122	-0.0820676	-0.14775	0.0734479	-0.100301	-0.0563248	-0.533735	-0.0226195	0.169274	-0.00772838	0.000793816	-0.0284159	-0.0686566	-0.0154714	-0.0509509	-0.00178454	-0.299874
TCGA-78-7148	0.147514	-0.240333	0.155747	-0.00427409	-0.0706464	-0.044295	0.0340478	0.0835374	-0.0885145	-0.107001	-0.0174935	-0.0667651	-0.0715285	-0.533735	0.0130784	0.196688	-0.00887482	0.0324561	-0.0436783	-0.0174714	-0.0222866	-0.0554733	-0.0338579	-0.278905
TCGA-78-7149	-0.0144046	-0.204521	0.143325	-0.0292121	-0.091376	-0.0283112	-0.00479506	0.0411223	-0.0784598	-0.0972658	-0.0322622	-0.0828623	-0.0336177	-0.533735	-0.0736784	0.184997	-0.0313186	0.0435762	-0.0822054	-0.0357746	-0.0128497	0.0828155	-0.087341	-0.379672
TCGA-78-7150	0.0784719	-0.266115	0.111425	-0.161592	-0.123469	0.0129731	0.0164147	0.114144	-0.125678	-0.132961	-0.118047	-0.0104641	-0.049492	-0.533735	-0.109818	0.176139	-0.00663794	0.0128862	-0.0548226	0.0351805	0.00363103	-0.137434	0.0221472	-0.299777
TCGA-78-7152	0.0645065	-0.12888	0.162863	0.0260913	-0.147521	-0.0565827	0.0627189	0.14978	-0.11287	-0.141255	-0.0784044	-0.0320533	-0.0454177	-0.533735	0.0438766	0.16152	-0.0142534	0.032693	-0.0461073	-0.0354021	-0.0180006	-0.0152191	-0.0444571	-0.227551
TCGA-78-7153	0.0549368	-0.142653	0.153681	-0.0320536	-0.176662	-0.0154824	-0.0225467	0.0592938	-0.0773308	-0.19505	0.0463615	-0.0443042	-0.049522	-0.533735	-0.0316216	0.150307	-0.0161921	0.0300573	-0.0483336	-0.0372218	-0.0423869	-0.0351433	-0.0227866	-0.382002
TCGA-78-7154	0.103253	-0.237074	0.120461	-0.101876	-0.123086	-0.0197307	0.00948713	0.117013	-0.0339565	-0.064939	-0.104415	-0.123445	-0.0508074	-0.533735	-0.0591532	0.185368	-0.00905514	0.00886465	-0.06909	0.0357324	0.0223934	-0.204123	0.0326359	-0.375012
TCGA-78-7155	-0.070468	-0.191712	0.146698	-0.0695425	-0.191859	-0.0327544	0.0088636	0.0463682	-0.218636	-0.226884	-0.170774	-0.157001	-0.0312772	-0.533735	-0.11911	0.19802	0.000971581	0.0290306	-0.0307326	0.0278925	-0.050525	-0.222784	0.104289	-0.359383
TCGA-78-7156	0.0229786	-0.261171	0.163025	-0.04188	-0.125129	-0.0414022	-0.0150196	-0.00162623	-0.0801974	-0.13337	-0.0733487	-0.13415	-0.0532211	-0.533735	-0.01657	0.230297	0.059148	0.0648324	-0.047358	-0.0301337	-0.0118963	0.061292	-0.0820128	-0.410834
TCGA-78-7158	0.0589524	-0.180843	0.167726	-0.131193	0.00150291	0.0139499	0.0170215	0.110643	-0.0832458	-0.13607	-0.137023	-0.101979	-0.0518895	-0.533735	-0.106546	0.182302	0.0247943	0.023566	-0.012247	-0.0576511	-0.0366196	0.00159013	-0.0605958	-0.326861
TCGA-78-7159	0.232532	-0.127292	0.151096	-0.0479914	-0.0585807	-0.0246689	0.0132085	0.108674	-0.110756	-0.0089732	0.0034624	0.115109	-0.0623303	-0.533735	-0.0678177	0.196043	-0.00421967	0.050317	-0.035699	-0.0221577	0.0164037	-0.0810676	0.0308225	-0.298709
TCGA-78-7160	0.183041	-0.174423	0.186725	0.0602086	0.00535765	-0.014823	0.0918571	0.182497	-0.0681835	-0.045945	-0.0626656	0.00216929	-0.0590606	-0.533735	0.108855	0.205442	0.0141814	0.0668982	-0.0355489	0.0214956	0.0473213	-0.00648219	0.00978544	-0.230463
TCGA-78-7161	0.119502	-0.22332	0.172936	-0.10058	-0.233854	-0.0195795	-0.0304189	0.0678618	-0.0782309	-0.0746954	0.0624273	-0.0680302	-0.0262037	-0.533735	-0.110205	0.212935	-0.0138553	0.0952719	-0.0449839	-0.00518095	-0.0102004	0.0299871	-0.0209596	-0.372779
TCGA-78-7162	0.173632	-0.156138	0.155564	0.11743	0.0980766	-0.0322609	0.0887224	0.157724	0.0148525	-0.0640761	-0.0914648	-0.0739007	-0.0285061	-0.533735	0.102505	0.194054	-0.00402208	0.0648784	-0.00729392	0.0512878	0.0452033	-0.0282089	-0.0667212	-0.268421
TCGA-78-7163	0.103707	-0.180634	0.121825	-0.0267443	-0.189522	-0.0235658	0.0442318	-0.00412588	-0.0885186	-0.0866933	0.013054	-0.0726974	-0.0471587	-0.533735	-0.0391153	0.198191	0.0479269	0.0234136	-0.00480931	-0.0621167	-0.0405405	-0.15672	-0.093871	-0.319581
TCGA-78-7166	0.0578325	-0.196529	0.14233	-0.00894384	-0.131643	-0.0467335	0.0073971	0.049084	-0.14802	-0.129569	-0.00567397	-0.0201438	-0.074101	-0.533735	-0.0813451	0.181786	-0.0197068	0.00596284	-0.0592003	-0.0781952	-0.060081	0.0447748	-0.0284771	-0.342685
TCGA-78-7167	0.0102642	-0.235257	0.150835	-0.041472	-0.132968	-0.0111051	-0.016467	0.0513939	-0.091716	-0.170371	-0.0362622	-0.0868326	-0.0477457	-0.533735	-0.0918016	0.218535	0.0631792	0.0577771	-0.015078	-0.0132325	-0.0446177	0.0599309	-0.124764	-0.386953
TCGA-78-7220	0.111019	-0.247494	0.140612	-0.111765	-0.173245	-0.0257382	0.0174357	0.0459347	-0.115905	-0.122683	-0.109707	-0.0449527	-0.0776209	-0.533735	-0.0956283	0.20808	0.00183108	0.0153696	-0.0177163	-0.0265258	-0.0260144	-0.0607673	0.0377102	-0.36812
TCGA-78-7535	0.00594532	-0.256441	0.135259	-0.0162318	-0.239696	-0.0670514	0.126201	0.128806	-0.137661	-0.0605007	0.030808	-0.0154388	-0.0443315	-0.533735	-0.175056	0.141286	-0.0408474	-0.00117549	-0.0962039	-0.135246	0.0216668	-0.0439019	-0.020858	-0.411902
TCGA-78-7536	0.0554198	-0.180297	0.1221	-0.0305189	-0.196859	-0.0185841	-0.0518904	0.0860154	-0.173337	-0.105535	-0.0613953	-0.0866951	-0.0665893	-0.533735	-0.0646972	0.219618	0.0125144	0.0414536	-0.0207	-0.00170081	-0.0536675	-0.133672	0.0570513	-0.295699
TCGA-78-7537	0.0222158	-0.194178	0.139235	-0.0737978	-0.0162816	-0.0441601	0.0896053	0.113818	-0.065295	-0.11824	-0.0818357	-0.0492309	-0.0363003	-0.533735	-0.0650106	0.165728	0.00596746	0.033835	-0.0891297	-0.0306632	-0.0457516	0.0733641	-0.0810641	-0.234152
TCGA-78-7539	0.173833	-0.168654	0.171187	0.106121	0.103408	-0.0299149	0.0865861	0.216334	-0.0991359	-0.147551	-0.0678249	-0.0158052	-0.0743342	-0.533735	0.114411	0.197509	0.0239572	0.0785355	0.0190981	-0.0530609	0.0597383	0.0662892	-0.110081	-0.237938
TCGA-78-7540	0.0845404	-0.235124	0.133488	-0.0916119	-0.0608683	0.0207705	0.0495213	0.172721	-0.119333	-0.128266	0.0745601	-0.0512975	-0.0359429	-0.533735	-0.0909099	0.172254	-0.0561223	0.00772187	-0.0503419	-0.118049	-0.039916	0.00388632	-0.0492743	-0.400835
TCGA-78-7542	0.256237	-0.236064	0.143328	-0.055462	-0.101604	-0.0450209	-0.000465551	0.0760971	-0.153585	-0.123896	-0.0106586	-0.000429309	-0.035243	-0.533735	-0.0628773	0.195151	0.00525955	0.0194925	-0.0988843	0.00442461	-0.0103388	-0.0888871	0.0079833	-0.245219
TCGA-78-7633	0.0792688	-0.267022	0.157585	-0.10748	-0.0577678	-0.0168092	0.032398	0.0966742	-0.0568908	-0.0950264	-0.117989	-0.135171	-0.0503057	-0.533735	-0.106108	0.180637	0.0235548	0.0509865	-0.0699282	-0.000442217	0.00504211	0.0721261	-0.0798665	-0.356373
TCGA-78-8640	0.134916	-0.221526	0.146686	-0.0221477	-0.142169	-0.0539552	0.068002	0.113713	-0.185596	-0.0880861	-0.113626	-0.0588572	-0.0480445	-0.533735	-0.103967	0.154168	-0.00244729	0.0423777	-0.0733944	-0.0386422	-0.0559062	-0.118401	0.0251596	-0.328123
TCGA-78-8648	0.160005	-0.0996249	0.200887	0.212435	-0.0199492	-0.0178796	0.127414	0.262342	-0.0200464	0.0304501	-0.0554094	0.0344254	-0.0113602	-0.533735	0.116837	0.167153	-0.0239183	0.0892399	-0.0162336	0.0260304	0.0573236	-0.107423	-0.0333526	-0.267741
TCGA-78-8655	0.145113	-0.203207	0.168433	-0.0197616	-0.0470402	-0.0285477	0.10646	0.160935	-0.0735221	-0.046718	-0.122026	-0.0297867	-0.048194	-0.533735	0.0102391	0.183733	-0.0256936	0.0507434	0.00337212	-0.0606797	-0.023141	-0.0225339	-0.0834691	-0.236385
TCGA-78-8660	0.199358	-0.173328	0.157409	0.14613	-0.0290173	-0.0491446	0.110889	0.183867	-0.131966	-0.0630637	-0.0783163	0.0474664	-0.0442031	-0.533735	0.0651545	0.18345	-0.0110534	0.0482045	0.015603	-0.0506606	0.0243474	-0.0836858	-0.0131546	-0.206485
TCGA-78-8662	0.00333314	-0.217816	0.154313	-0.137123	-0.198019	-0.064661	0.0106856	0.034659	-0.162791	-0.168224	-0.0257019	-0.13724	-0.0200189	-0.533735	-0.128058	0.182633	-0.0470153	0.0319524	-0.0542865	-0.00277195	-0.0748622	-0.155412	-0.0237554	-0.369382
TCGA-80-5608	0.224662	-0.217967	0.158822	0.0319805	-0.15068	-0.0415105	0.0473314	0.122659	-0.0951203	-0.0354821	0.0220487	0.17819	-0.0638733	-0.533735	-0.0353469	0.176709	-0.0192067	0.0341755	0.00969208	-0.00294805	-0.038933	-0.00484139	0.000171252	-0.375595
TCGA-80-5611	0.183342	-0.229288	0.127381	-0.0404311	-0.111414	-0.0721539	0.088169	0.202017	-0.14718	-0.0900604	-0.0150183	-0.080688	-0.0847363	-0.533735	-0.0355896	0.187111	-0.0514161	0.048534	-0.0829964	-0.0417019	-0.00882291	0.0120589	-0.00603237	-0.242501
TCGA-83-5908	0.258666	-0.209101	0.188718	0.210998	-0.116054	-0.0375356	0.00927514	0.0967868	-0.160448	-0.073173	-0.0236725	0.0174554	-0.0554685	-0.533735	0.169689	0.224069	0.0101516	0.0531563	0.000682546	0.027749	0.10649	-0.0331635	0.0094398	-0.250655
TCGA-86-6562	0.0724436	-0.208928	0.138035	-0.0871521	-0.0639071	-0.0187893	0.0834902	0.152483	-0.0673623	-0.0383951	-0.0596466	-0.0769058	-0.0464226	-0.533735	-0.0896229	0.189124	-0.00697773	0.0521133	-0.0143447	0.00641783	-0.00775554	-0.0307393	-0.016986	-0.375983
TCGA-86-6851	0.219443	-0.0530015	0.17718	0.193965	-0.00953965	-0.0618694	0.0721291	0.187791	-0.0904349	-0.100409	-0.114128	0.0886835	-0.0744369	-0.533735	0.177574	0.236343	0.0526574	0.123187	0.0478294	0.0288216	0.0878383	0.00960353	-0.0737623	-0.206096
TCGA-86-7701	0.209313	-0.00855817	0.141245	0.113431	-0.0942993	-0.0357859	0.0566508	0.11473	-0.0660682	-0.0824917	-0.0686097	0.00737776	-0.0761062	-0.533735	0.174484	0.242068	0.0433295	0.0640648	0.0346792	0.00341385	0.0156437	-0.0148375	0.0458985	-0.21396
TCGA-86-7711	0.074549	-0.215448	0.114758	-0.0850925	-0.097191	-0.0528887	0.116163	0.187616	-0.114562	0.134823	-0.0803951	-0.0654601	-0.0528509	-0.533735	-0.117763	0.142538	-0.052079	0.0173704	-0.0465403	0.0326826	0.00269536	-0.110114	-0.0219172	-0.313173
TCGA-86-7713	0.137703	-0.221548	0.0938727	-0.101885	-0.152232	-0.0256735	-0.0441174	0.024599	-0.0835374	-0.124528	0.0826688	-0.0099262	-0.0660221	-0.533735	-0.140535	0.158511	0.0378595	0.0399046	-0.00212793	-0.0199735	-0.0560249	-0.0225628	0.0313861	-0.332298
TCGA-86-7714	0.115551	-0.190749	0.160816	-0.0457998	0.0528778	-0.00190185	0.152113	0.169348	-0.0264823	-0.0605651	-0.0747798	-0.0551359	-0.0531344	-0.533735	-0.030089	0.166255	0.0283574	0.039252	-0.00747285	-0.0123473	-0.0576695	-0.0321699	-0.0632151	-0.372294
TCGA-86-7953	0.191896	-0.199024	0.13603	-0.0590824	-0.0658241	-0.00991221	0.0767944	0.165151	-0.120431	-0.00766641	-0.0907443	-0.0286873	-0.0400951	-0.533735	0.00576288	0.161129	-0.0367878	0.0532888	-0.0438609	-0.0103351	0.0357054	0.00221308	-0.000394817	-0.235026
TCGA-86-7954	0.331428	-0.190358	0.129689	-0.00497861	-0.0582869	-0.0300219	0.052595	0.156358	-0.0580466	-0.0281667	-0.0661361	-0.0217686	-0.0572644	-0.533735	0.0658693	0.185744	-0.00101898	0.0468169	0.0103336	-0.0316602	0.0376647	-0.168545	-0.051105	-0.218037
TCGA-86-7955	0.103704	-0.202408	0.105585	-0.140489	-0.266306	-0.0835442	-0.0450323	-0.0157128	-0.177057	-0.175965	0.0163256	-0.0698504	-0.0648672	-0.533735	-0.128379	0.14063	0.00719995	0.0724154	-0.0890775	0.0336873	-0.0957444	-0.108385	0.00287715	-0.332298
TCGA-86-8054	-0.0317749	-0.226691	0.127147	-0.136643	-0.165128	-0.009065	-0.0432612	0.072726	0.00281993	-0.139108	0.019854	-0.0941152	-0.0640777	-0.533735	-0.12795	0.206866	0.0256486	0.0345953	-0.00630164	-0.0411952	-0.0518729	-0.167897	0.0369569	-0.371129
TCGA-86-8055	0.128793	-0.16561	0.120989	-0.0825662	0.0219055	-0.0153432	0.0749991	0.250753	-0.0665389	-0.061889	-0.101733	-0.0165796	-0.00532104	-0.533735	-0.0734086	0.167984	-0.00617625	0.0602882	-0.0318263	-0.00697754	0.0277954	-0.118374	-0.00198114	-0.280458
TCGA-86-8056	0.083533	-0.208615	0.17006	-0.0997935	-0.0287071	-0.0284019	0.0762299	0.192962	-0.03685	-0.0595894	0.0116755	-0.121955	-0.0547952	-0.533735	-0.0383007	0.191772	0.0436055	0.0579742	0.00804766	0.0143772	0.0227725	0.132757	-0.0455829	-0.307543
TCGA-86-8073	0.050525	-0.257916	0.155366	-0.142641	-0.158741	0.00147335	0.096013	0.212415	-0.0752495	-0.0745421	-0.142941	-0.133469	-0.058309	-0.533735	-0.11614	0.20374	0.0195378	0.0532905	-0.0374703	0.0232894	0.0037194	-0.0807141	-0.0279158	-0.33822
TCGA-86-8074	0.142441	-0.242884	0.119429	-0.123634	0.0313966	-0.0348665	0.0790356	0.164708	-0.0895625	-0.0587384	-0.0294705	-0.026759	-0.0288431	-0.533735	-0.0688714	0.202223	-0.0360075	0.0275499	-0.0233719	-0.0301219	0.0370074	-0.0517985	-0.014961	-0.246966
TCGA-86-8075	0.198895	-0.197945	0.136022	-0.124253	-0.0722485	-0.0312569	0.0762426	0.210797	-0.0409522	-0.0436705	-0.0868684	-0.03912	-0.0149337	-0.533735	-0.0971591	0.18401	-0.022868	0.0347343	-0.0360098	-0.0485986	0.0541879	-0.137637	0.00710613	-0.299583
TCGA-86-8076	0.172437	-0.0545037	0.185418	0.135917	-0.0381934	-0.0334024	0.0904928	0.185605	-0.062244	0.000676083	0.0425003	0.029054	-0.0663399	-0.533735	0.14078	0.20225	0.0198172	0.0385314	-0.0268041	-0.0272845	0.0232103	0.0118499	-0.026125	-0.272595
TCGA-86-8278	0.222752	-0.194858	0.144165	-0.0137091	-0.10813	0.0150636	0.0799673	0.166263	-0.0689257	-0.0308446	-0.0494702	-0.00623262	-0.0290606	-0.533735	-0.0643576	0.175139	-0.00347407	0.0624103	-0.0599235	-0.0610631	-0.0128902	0.00118584	-0.0492178	-0.29735
TCGA-86-8279	0.187342	-0.2751	0.1358	-0.0961426	-0.0906372	-0.0265776	0.0859378	0.127995	-0.107352	-0.122765	-0.102661	-0.067399	-0.0190408	-0.533735	-0.186507	0.16811	0.00180761	0.0333027	-0.0518417	-0.044068	-0.00904608	-0.150346	-0.0556486	-0.320357
TCGA-86-8280	0.192302	-0.142932	0.166671	0.0394537	0.121467	-0.0428792	0.143595	0.220088	-0.0425607	-0.0782081	-0.0113653	-0.00352758	-0.0363032	-0.533735	0.0945309	0.201164	0.0162956	0.0492347	0.0373552	-0.032257	0.0335892	-0.14826	-0.0788763	-0.235511
TCGA-86-8358	0.0354388	-0.178655	0.133397	-0.0719715	-0.208096	0.00835952	-0.0193157	0.0471595	-0.0785924	-0.137939	-0.0350248	-0.117803	-0.0479471	-0.533735	-0.046245	0.221574	0.0205381	0.0571313	-0.0183711	-0.0150748	-0.0177876	-0.0975182	0.0940991	-0.323658
TCGA-86-8359	0.103999	-0.256309	0.160232	0.116156	-0.241893	-0.0121055	0.0282221	0.0283547	-0.098082	0.0203267	0.00122371	0.0544375	-0.0402937	-0.533735	0.114786	0.153307	-0.0136502	0.0307676	0.0203217	0.00719925	0.0294009	-0.00353206	-0.0141218	-0.202116
TCGA-86-8585	0.13154	-0.118484	0.164597	0.104423	-0.0273026	-0.0621489	0.0510725	0.156295	-0.160681	-0.123852	0.0203459	0.0402559	-0.0728047	-0.533735	0.0512279	0.191497	0.00509841	0.0281676	-0.0541853	-0.0488733	-0.0431472	-0.141484	-0.00743405	-0.279682
TCGA-86-8668	0.124218	-0.101875	0.135204	-0.0078623	0.0274407	-0.00390938	0.111687	0.193898	-0.0632782	-0.0773871	-0.0211235	-0.0451159	0.00823424	-0.533735	0.000673857	0.182534	0.0217579	0.0717418	0.0294062	-0.0239695	0.0418978	-0.0189075	-0.0896782	-0.250364
TCGA-86-8669	0.175959	-0.175695	0.171374	0.000204377	-0.0138705	0.0135868	0.0822752	0.168964	-0.114018	-0.0870911	-0.0616433	0.00820605	-0.0712421	-0.533735	0.00381695	0.183648	0.022788	0.0783565	-0.0450867	-0.0655155	-0.0149953	-0.00386864	-0.0823286	-0.248908
TCGA-86-8671	0.278763	0.0206898	0.193412	0.227929	0.0728447	-0.057928	0.176475	0.231079	-0.0449833	-0.0110048	-0.0379062	0.0699085	-0.0492967	-0.533735	0.263156	0.230474	0.0291384	0.0980426	0.0525689	-0.0291229	0.0800246	-0.0515738	-0.0408045	-0.062227
TCGA-86-8672	0.0892121	-0.214117	0.167184	0.11955	-0.0969116	-0.0610411	0.0266951	0.158077	-0.131958	-0.118334	-0.0144786	0.0332459	-0.0492161	-0.533735	0.0155127	0.172291	-0.0554043	0.0450371	-0.0510041	0.0278995	-0.00292646	-0.0877272	0.000125874	-0.158528
TCGA-86-8673	0.111715	-0.225477	0.122986	0.0163145	-0.20935	-0.0400546	0.0316404	0.080768	-0.173562	-0.054142	0.0220424	-0.0176752	-0.0169596	-0.533735	-0.0473047	0.158014	-0.0230882	0.0215799	-0.0529399	0.0127098	-0.0175123	0.018176	-0.000290961	-0.265702
TCGA-86-8674	-0.0122969	-0.263803	0.146604	-0.0994037	-0.144536	-0.0157169	0.0158146	0.0242219	-0.136954	-0.0997904	-0.0382868	-0.0538834	-0.0674438	-0.533735	-0.147529	0.165159	-0.0294931	0.0106806	-0.0332364	-0.069129	-0.0488234	0.0390074	-0.0523221	-0.355305
TCGA-86-A456	0.201708	-0.231932	0.160829	-0.0120168	0.0137173	0.022443	0.105136	0.256912	-0.0506823	-0.0300446	0.0359529	-0.0502411	-0.0585909	-0.533735	-0.00945085	0.174308	-0.00656409	0.0775561	-0.0397099	-0.0318398	0.0708503	-0.046083	-0.0677674	-0.301427
TCGA-86-A4D0	0.0432448	-0.1858	0.134918	-0.0236186	-0.164309	-0.0222459	-0.024347	0.0761579	-0.119858	-0.187653	0.0169922	-0.00915721	-0.0632561	-0.533735	-0.0386587	0.198795	-0.00917073	0.0552847	-0.0544404	-0.0472996	-0.0709999	-0.253351	0.0657642	-0.274731
TCGA-86-A4JF	0.245768	-0.200677	0.172125	0.10235	-0.0816914	-0.0276337	0.010086	0.145746	-0.10649	-0.0122716	-0.107698	-0.0300752	-0.0708244	-0.533735	-0.0564317	0.19549	-0.0192259	0.0109796	-0.0229169	-0.0156469	0.0301853	-0.056818	-0.0076972	-0.2824
TCGA-86-A4P7	0.124819	-0.118143	0.19319	0.104602	-0.0130795	-0.0179303	0.0883071	0.174703	-0.0377205	-0.0486099	-0.0178687	-0.0356059	-0.0333113	-0.533735	0.0468759	0.179156	0.00490948	0.072383	0.0416666	-0.0183699	0.0409521	-0.0554298	-0.0806931	-0.338414
TCGA-86-A4P8	0.206279	-0.197844	0.203769	0.233913	-0.00156095	0.00499189	0.132466	0.248132	0.0193132	-0.000748193	-0.0400416	-0.0623802	-0.0211051	-0.533735	0.167794	0.201488	0.0466311	0.118085	-0.029991	0.0672275	0.0588142	-0.0892677	-0.0768862	-0.326182
TCGA-91-6828	0.205192	-0.171158	0.161782	0.0172108	-0.015562	0.00590456	0.0883156	0.221751	-0.0911146	0.0196407	-0.0169847	0.00498433	-0.0792505	-0.533735	0.0410821	0.211533	0.0577483	0.105587	0.00997292	-0.0315242	0.020441	-0.089159	-0.0318796	-0.299388
TCGA-91-6829	0.0235153	-0.181381	0.113865	-0.0969805	-0.139325	-0.0199408	0.0842768	0.21175	-0.017996	-0.0731166	-0.121588	-0.0787204	0.00289927	-0.533735	-0.159877	0.139309	-0.00461281	0.0724349	-0.037054	0.0698746	0.0083786	-0.244763	0.0284777	-0.364528
TCGA-91-6830	0.235935	-0.168882	0.126296	0.0179211	-0.0702171	-0.0103038	0.0615382	0.203582	-0.0402185	0.0138935	-0.102786	-0.0617434	-0.0272225	-0.533735	0.0121925	0.196119	0.0184604	0.0519636	-0.0747438	0.102548	0.042112	-0.161609	-0.0456343	-0.37443
TCGA-91-6831	0.183091	-0.175987	0.137173	-0.0453317	-0.163111	0.00449555	-0.014158	0.15473	-0.116039	-0.0824339	-0.0323176	-0.0345778	0.00165746	-0.533735	-0.0739479	0.172511	0.00937394	0.0441505	-0.0506198	0.0328185	-0.0815834	-0.13744	0.0837332	-0.274439
TCGA-91-6835	0.225815	0.00059707	0.183744	0.153477	0.00950709	-0.0456471	0.127065	0.236995	-0.0705085	-0.0186108	-0.11915	-0.0495209	-0.0623808	-0.533735	0.218346	0.212795	0.0646729	0.0963763	0.0584231	-0.0484154	0.0613896	-0.0312199	-0.0350449	-0.196874
TCGA-91-6836	0.115016	-0.231412	0.15599	-0.0836644	-0.115375	-0.014774	-0.0359605	0.108676	-0.116557	-0.127287	-0.181756	-0.0460968	-0.0728102	-0.533735	-0.0642462	0.190426	0.0308007	0.048304	-0.0347668	0.0301508	0.00883747	0.0637768	0.0286529	-0.29667
TCGA-91-6840	0.239424	-0.200915	0.161278	-0.0276201	-0.159276	-0.0463905	0.00337013	0.099172	-0.117538	-0.0900628	-0.00207351	-0.0873925	-0.0062373	-0.533735	-0.0198666	0.218658	-0.00895986	0.02614	-0.00222864	-0.0861014	-0.00198399	-0.194794	-0.0486882	-0.309387
TCGA-91-6847	-0.0717719	-0.213711	0.116417	-0.0731931	-0.170489	-0.052817	-0.0385488	-0.0160968	-0.129157	-0.193288	-0.0987651	-0.097473	-0.0154925	-0.533735	-0.188406	0.18533	0.013274	0.0898574	-0.0162978	0.00552385	-0.0784801	-0.157415	0.0541371	-0.411028
TCGA-91-6848	0.13687	-0.172738	0.143933	0.0837057	0.000126797	-0.0295239	0.0357805	0.201117	-0.148649	0.0320451	-0.157511	-0.00840268	-0.0309105	-0.533735	0.0195409	0.203755	0.00350888	0.0772157	-0.0709948	0.179649	0.0963781	-0.24047	0.0549067	-0.278517
TCGA-91-6849	-0.0166201	-0.0812689	0.177478	0.0475187	0.0371095	0.0182996	0.15086	0.216127	-0.0633531	-0.0399585	-0.0440509	-0.0334111	-0.0775778	-0.533735	-0.00380107	0.172437	0.0042018	0.0428741	-0.00578938	-0.0520794	0.0219131	0.0559634	-0.0977376	-0.325017
TCGA-91-7771	0.169749	-0.146969	0.186578	0.0981625	-0.000136109	0.0192072	0.089731	0.195732	-0.03473	-0.0781225	-0.0522836	-0.0619877	-0.071807	-0.533735	0.136231	0.20504	0.0528472	0.0679426	-0.0264989	0.0368784	0.0532322	-0.0604902	-0.0386731	-0.246481
TCGA-91-8496	0.0379907	-0.204908	0.186978	-0.00456966	0.113447	0.0109844	0.14591	0.216118	0.040996	-0.00111986	-0.0707787	-0.0923262	-0.0827653	-0.533735	0.032696	0.174681	-0.0107487	0.0231391	-0.0138992	0.0478552	0.0313737	-0.116039	-0.0831611	-0.340938
TCGA-91-8497	0.0601173	0.000990566	0.175777	0.0600234	0.195716	-0.00198425	0.172264	0.24374	0.12036	-0.0546414	0.0141745	-0.0662442	-0.0428367	-0.533735	0.0884534	0.17598	0.0231552	0.083502	0.075081	-0.0531205	0.00945226	0.0697906	-0.103118	-0.263664
TCGA-91-8499	0.0285742	-0.176194	0.126477	-0.00391943	-0.135667	-0.0501511	-0.0271043	0.119386	-0.158296	-0.137934	-0.120135	-0.0996386	-0.0583153	-0.533735	-0.00289917	0.209743	-0.037214	-0.00751234	-0.0302677	-4.76e-05	-0.0253394	-0.298699	0.0527956	-0.362101
TCGA-91-A4BC	0.149398	-0.0793739	0.185199	0.208251	-0.192188	-0.00802323	-0.0254578	0.142671	-0.150659	-0.0653974	0.00749289	0.0386531	-0.0274721	-0.533735	0.228376	0.201468	0.0367049	0.0644084	0.0288273	0.00167529	0.0732362	-0.119616	0.00188678	-0.226968
TCGA-91-A4BD	0.119407	-0.16128	0.164275	0.0223696	0.0824351	-0.0280647	0.125127	0.183738	0.0326821	-0.00497979	-0.0429571	-0.0878204	-0.0650183	-0.533735	-0.0247002	0.189795	-0.00180971	0.0282719	-0.00795343	-0.0852982	0.0272362	-0.0242769	-0.107115	-0.351325
TCGA-93-7347	0.175168	-0.108151	0.175091	0.122635	0.14482	-0.00205254	0.153274	0.250075	0.00449495	-0.0457566	-0.0885146	-0.00473646	-0.032288	-0.533735	0.2197	0.196252	0.00778442	0.060269	0.0455536	-0.0342991	0.0501539	-0.10729	-0.0552553	-0.075915
TCGA-93-7348	0.0667925	-0.105223	0.147255	-0.0719907	-0.0784679	0.000718258	0.0681082	0.143939	-0.0638303	-0.0548169	0.00681012	-0.0144977	-0.028525	-0.533735	-0.00420585	0.182724	-0.0054862	0.0366753	0.00826882	-0.0356685	0.0568132	-0.0877311	-0.0584065	-0.277449
TCGA-93-8067	0.114703	-0.250888	0.141799	-0.038354	-0.152862	-0.0331764	0.0477695	0.0844704	-0.10241	-0.125807	0.0385517	-0.052173	-0.0470324	-0.533735	-0.0771457	0.175364	0.0174933	0.0403659	-0.0448971	0.0209835	-0.00843756	-0.0606378	-0.0189082	-0.286865
TCGA-93-A4JN	0.192597	-0.0772462	0.153854	-0.0664441	-0.0917238	-8.15e-06	0.0490506	0.1078	-0.0803571	-0.0566376	-0.0127992	-0.0357295	0.00442505	-0.533735	-0.0632352	0.205168	0.0447656	0.0454853	0.0191849	-0.0631149	0.0307897	-0.161697	-0.00539689	-0.306766
TCGA-93-A4JO	0.200754	-0.116031	0.181553	0.0970417	-0.0969393	-0.0644619	0.101174	0.167361	-0.100485	-0.0490674	0.0320805	0.0103736	-0.0515558	-0.533735	0.0792054	0.187217	0.0200483	0.0386911	0.00789772	-0.0272632	-0.000139098	-0.0830787	-0.0727552	-0.266964
TCGA-93-A4JP	0.265133	-0.251121	0.157052	-0.0646064	-0.0794152	-0.0260796	0.086902	0.178426	0.0497497	0.0010835	-0.0431341	-0.103472	0.00211202	-0.533735	-0.0963988	0.200479	0.00599873	0.0647545	-0.0308278	0.042046	0.0554739	-0.134098	-0.0328702	-0.385108
TCGA-93-A4JQ	0.259656	-0.0110579	0.140186	0.0793472	-0.0396481	-0.0232687	0.0626181	0.151277	-0.145055	-0.0860748	-0.0754989	0.0169233	-0.0252777	-0.533735	0.124633	0.198485	0.0501871	0.0611634	0.0164438	-0.062876	0.0707083	-0.151247	-0.0347524	-0.219687
TCGA-95-7039	0.108326	-0.203635	0.15117	-0.027507	-0.0915775	-0.0253306	0.0295352	0.123004	-0.0929963	-0.0923154	-0.0433037	-0.0412993	-0.0290253	-0.533735	-0.00852388	0.21581	-0.00622653	0.0390113	-0.00952514	-0.0140447	0.0187834	-0.0569195	-0.0653744	-0.336375
TCGA-95-7043	-0.0781322	-0.171189	0.126195	-0.153452	-0.171432	-0.0336686	0.0148959	0.0795093	-0.158837	-0.125937	-0.0952207	-0.102846	-0.0543512	-0.533735	-0.144097	0.189391	-0.0507037	0.0127242	-0.0451299	-0.0450803	-0.118592	-0.0338209	-0.0245576	-0.428599
TCGA-95-7562	0.214531	-0.196061	0.149471	-0.0884885	-0.156954	-0.0639914	0.000310326	0.142912	-0.157228	-0.064776	-0.0593054	-0.0181646	-0.0510627	-0.533735	-0.0357421	0.18127	-0.0221662	0.0835433	-0.00473619	-0.0669969	-0.00499613	-0.227249	0.0270887	-0.268615
TCGA-95-7567	0.147583	-0.18035	0.142134	-0.0126289	-0.0258783	-0.0476314	0.0470263	0.161653	-0.190371	-0.137058	-0.0261866	-0.0463149	-0.0600685	-0.533735	-0.0229856	0.173844	-0.0265121	0.058327	-0.0464584	0.0056115	0.0109463	-0.0281873	-0.0316395	-0.193865
TCGA-95-7944	0.209718	-0.184006	0.153081	0.211208	-0.0244184	-0.0705754	-0.0043185	0.104727	-0.14893	-0.0381331	-0.00131988	0.0552795	-0.000558452	-0.533735	0.136384	0.18131	-0.0165379	0.0232423	-0.0362732	-0.00204291	0.0482956	-0.103649	-0.0336072	-0.253568
TCGA-95-7947	0.216709	-0.154751	0.127496	0.00425874	-0.132767	-0.0730726	0.058269	0.10653	-0.139135	-0.084829	-0.167703	-0.132668	-0.0624832	-0.533735	0.00295904	0.208899	0.0228715	0.0368035	-0.0275666	0.0247715	-0.0233913	-0.0887189	0.000549126	-0.289292
TCGA-95-7948	-0.0647779	-0.174002	0.175644	-0.0752242	-0.130368	-0.0304696	0.00915605	0.0542902	-0.157355	-0.160988	0.0202272	-0.0925458	0.0112643	-0.533735	-0.107676	0.174766	-0.0334479	0.0289883	-0.0287738	-0.028553	-0.0675344	-0.0404074	-0.112653	-0.378022
TCGA-95-8039	0.135168	-0.180234	0.156118	0.0142194	0.102975	-0.0141533	0.152837	0.211894	-0.0530716	-0.0618338	-0.0710157	-0.0184036	-0.036657	-0.533735	0.0544072	0.181951	0.0122669	0.0777306	-0.00742656	-0.0133381	0.0368986	-0.0642642	-0.0315461	-0.161538
TCGA-95-8494	0.0622015	-0.255512	0.125011	-0.100426	-0.000300245	-0.0264965	0.0536742	0.137822	-0.135908	-0.107788	-0.0671214	-0.0244067	-0.046373	-0.533735	-0.175662	0.166497	-0.0514991	0.0424502	-0.0666601	-0.119779	-0.0129098	-0.0510466	-0.0104522	-0.251626
TCGA-95-A4VK	0.126652	-0.116424	0.175639	0.0257501	-0.0521532	-0.0536482	0.0174635	0.075493	-0.106693	-0.143652	-0.00922167	-0.0127867	-0.0488611	-0.533735	-0.0152546	0.174883	0.0178972	0.080177	0.0103253	-0.0226293	-0.0456441	0.0545468	-0.0611012	-0.273469
TCGA-95-A4VN	0.252455	-0.200759	0.168403	0.0998894	-0.00721751	-0.0422725	0.0719326	0.133387	-0.114821	-0.0145688	-0.0513656	0.0414103	-0.0506131	-0.533735	0.0516674	0.18371	-0.0222898	0.080557	-0.00261551	0.0546268	0.0761351	0.00196507	-0.00836162	-0.225221
TCGA-95-A4VP	0.127	-0.0328567	0.163029	0.0923655	-0.0634667	-0.034299	0.0711565	0.117818	-0.0736501	-0.0121917	0.0560674	0.0258139	-0.0197127	-0.533735	0.0379097	0.17228	-0.0365408	0.0643444	-0.0132465	-0.0561481	0.0372445	-0.121014	-0.00464519	-0.310067
TCGA-97-7546	0.0682985	-0.116924	0.189174	0.0391528	0.0399402	0.0311328	0.104527	0.180888	0.0572773	-0.0464305	-0.0615262	-0.0414798	-0.0136038	-0.533735	0.0748266	0.193438	0.0325116	0.067563	0.0502125	0.0210631	0.0551284	-0.122567	-0.0379731	-0.314533
TCGA-97-7547	0.0324409	-0.122747	0.156177	-0.109325	-0.0583716	-0.0250607	0.0794177	0.158013	-0.044215	-0.092092	-0.064727	-0.062299	-0.0449301	-0.533735	0.013939	0.157555	0.0270124	0.100151	0.00861364	-0.023069	-0.00361958	0.0230156	-0.0516394	-0.314241
TCGA-97-7552	0.256155	0.00816734	0.176414	0.20496	-0.03258	-0.0043627	0.0801861	0.204591	-0.0211443	-0.0660877	0.0672459	-0.0164497	-0.0484404	-0.533735	0.225116	0.203005	0.0577648	0.075779	0.00608722	0.11892	0.0413815	-0.087337	-0.0476975	-0.255703
TCGA-97-7553	0.212897	-0.149938	0.168725	0.121561	0.0065585	0.0141071	0.16223	0.264985	0.00872837	0.130209	-0.038312	-0.0329263	-0.0565083	-0.533735	0.0793628	0.189691	0.00912994	0.0818929	-0.00451988	0.0726974	0.046797	-0.0470921	-0.0493201	-0.31696
TCGA-97-7554	0.136013	-0.1601	0.167748	-0.0653467	0.0122123	-0.0206292	0.0541533	0.184004	-0.099456	-0.101206	-0.0949033	-0.0558401	-0.0418126	-0.533735	-0.0531586	0.152294	-0.0211056	0.0520796	-0.016832	-0.00173832	0.027337	-0.104805	-0.0337826	-0.263664
TCGA-97-7937	-0.00832468	-0.252892	0.147673	-0.115091	-0.168859	0.0251713	0.0305352	0.127272	-0.113075	-0.133169	-0.0795704	-0.0729666	-0.0568749	-0.533735	-0.164173	0.183799	0.0283748	0.0562204	-0.0628744	0.0325079	-0.0405036	-0.0916482	-0.0216189	-0.373362
TCGA-97-7938	0.0643011	-0.171208	0.199449	-0.046378	-0.0407676	0.00551381	0.0760821	0.174765	-0.0274306	-0.0883005	-0.10617	-0.0669769	-0.0332051	-0.533735	-0.0506272	0.187303	0.0353184	0.0329756	0.0376555	0.00273752	0.0526412	-0.0373322	-0.0738	-0.357732
TCGA-97-7941	0.132041	-0.210434	0.144977	-0.0450543	0.00687811	0.00474698	0.116012	0.159911	-0.0277426	-0.0662169	0.069827	-0.00140159	-0.0221723	-0.533735	-0.00759945	0.158219	-0.018975	0.0335248	0.000570375	-0.0302835	-0.0257238	-0.0211027	-0.0859977	-0.330453
TCGA-97-8171	0.0310765	-0.174114	0.156255	-0.172795	-0.128841	0.013338	-0.00914162	0.0726177	-0.170292	-0.129737	-0.0583813	-0.132667	-0.06823	-0.533735	-0.21796	0.213568	0.033226	0.0555152	-0.0560132	-0.0723438	-0.0745967	0.0645204	-0.0526296	-0.441996
TCGA-97-8172	0.0619773	-0.0271233	0.188875	0.040941	0.0601088	-0.0337674	0.117958	0.206805	0.110497	-0.0606715	-0.0155134	-0.0343444	-0.0470017	-0.533735	0.0916343	0.204282	0.0633543	0.117201	0.0278515	0.0162876	-0.00817306	-0.050228	-0.0987325	-0.291234
TCGA-97-8174	0.19924	-0.199723	0.179625	0.00607548	0.0514924	-0.0243624	0.0686935	0.15622	-0.0294724	-0.061266	-0.0785837	-0.0616161	-0.0282062	-0.533735	0.0317807	0.20853	0.052411	0.0969091	-0.0315232	0.0243982	0.018965	0.045521	-0.0753877	-0.282206
TCGA-97-8175	0.108436	-0.216062	0.109766	-0.0871516	0.0146026	-0.0336572	0.134696	0.166691	-0.0663201	-0.0707319	-0.0240525	-0.0502263	-0.0749865	-0.533735	-0.084143	0.185616	-0.0375865	0.0514751	0.000993987	-0.0258477	0.00430445	-0.0291052	-0.0460708	-0.263664
TCGA-97-8176	0.0430538	-0.233915	0.132441	-0.137398	-0.202874	-0.0280728	0.0488506	0.139185	-0.12244	0.00964592	-0.00186898	-0.0757609	-0.0659828	-0.533735	-0.136353	0.163312	-0.0210881	0.029964	-0.0874817	-0.064135	-0.0609767	-0.0792811	0.00660161	-0.345598
TCGA-97-8177	0.104385	-0.122438	0.17613	0.0212883	0.0701754	-0.0381468	0.159937	0.241412	0.0363359	-0.0138659	-0.0426044	-0.0523446	-0.0589614	-0.533735	-0.00484231	0.168102	-0.0185419	0.0185226	-0.00746379	-0.0426549	0.0548633	-0.1584	-0.056812	-0.29968
TCGA-97-8179	0.068251	-0.214991	0.155549	-0.068488	-0.106947	-0.0153802	0.09218	0.131316	-0.0192533	-0.0988809	-0.0644706	-0.0836744	-0.0537486	-0.533735	-0.103048	0.216829	-0.0147755	0.0728309	-0.0443227	0.032639	-0.0192615	-0.1245	-0.0717362	-0.353073
TCGA-97-8547	0.144102	-0.222316	0.141551	-0.136015	0.17902	-0.0138119	0.0800926	0.225473	-0.0521538	-0.0363397	-0.03689	-0.0453284	-0.0101781	-0.533735	-0.0593104	0.157577	-0.0401383	0.0697948	-0.0229465	-0.0273773	0.0247653	-0.0620108	-0.0483964	-0.20464
TCGA-97-8552	0.0873713	-0.156726	0.165906	-0.0425714	0.0981774	0.00238961	0.164651	0.200085	-0.00863332	-0.00973463	0.0617454	-0.0927164	-0.0246603	-0.533735	-0.0130055	0.185549	0.014927	0.0520849	0.0299861	-0.0567372	0.0194802	-0.0916835	-0.105483	-0.320746
TCGA-97-A4LX	0.253641	-0.0124255	0.172824	0.130997	0.10816	-0.0383077	0.108933	0.24034	-0.108854	-0.0443524	-0.055475	0.026216	-0.0397509	-0.533735	0.178735	0.230611	0.0239587	0.10252	0.00919459	0.00966018	0.0815264	-0.0635488	-0.0533895	-0.132608
TCGA-97-A4M0	0.18818	-0.138854	0.193731	0.0809997	0.0379536	-0.0073746	0.0624438	0.164639	-0.00910777	-0.128783	-0.00277511	-0.0943127	-0.0565874	-0.533735	0.0705088	0.175434	0.065126	0.0493108	0.016851	-0.0354936	0.00260155	-0.0232211	-0.107716	-0.232405
TCGA-97-A4M1	0.0809625	-0.216623	0.165975	-0.0198153	0.122151	-0.0216202	0.121684	0.167497	0.0818965	-0.0371749	-0.0688876	-0.0630396	-0.023595	-0.533735	-0.0191553	0.183516	-0.0115957	0.0777751	-0.00728126	-0.00714673	0.0264934	0.0283013	-0.1014	-0.383458
TCGA-97-A4M2	0.207792	-0.143205	0.175824	0.148048	0.0231859	-0.0100065	0.15135	0.267645	0.0201556	0.00660682	-0.0163418	-0.0740152	-0.0421914	-0.533735	0.0703718	0.192335	0.0298151	0.0707186	-0.038108	-0.00294906	0.0433491	-0.0514966	-0.105712	-0.329483
TCGA-97-A4M3	0.0179641	-0.248836	0.145607	-0.124803	-0.0835454	0.0263056	0.0439774	0.0792236	-0.0617427	-0.0989679	-0.040629	-0.0757929	-0.0391965	-0.533735	-0.101877	0.188601	-0.00444909	0.0459809	-0.0559844	-0.0499039	0.0166847	-0.0152595	-0.096366	-0.336472
TCGA-97-A4M5	0.176696	-0.206752	0.149673	0.0251461	-0.0435249	-0.0376402	0.0820427	0.183912	0.013172	-0.0475276	0.0437618	-0.025926	-0.0281834	-0.533735	-0.0492847	0.174357	-0.0257747	0.0824813	-0.0640929	0.0256612	-0.0227664	-0.00778251	-0.0692238	-0.341811
TCGA-97-A4M6	0.241666	-0.0904535	0.18904	0.0938686	0.0126144	-0.0167857	0.113539	0.196921	-0.0101608	-0.0315183	-0.0275825	-0.0352366	-0.0779478	-0.533735	0.110544	0.237256	0.0114977	0.0848289	0.0133534	-0.0332363	0.0168665	-0.0441248	-0.0930075	-0.236482
TCGA-97-A4M7	0.157545	-0.112724	0.151677	-0.0192857	0.0973839	0.0260694	0.1553	0.203183	0.0458606	-0.00983639	0.00298869	-0.031561	-0.0150146	-0.533735	0.0745503	0.208767	0.036242	0.0690306	0.0453849	-0.062553	0.052477	-0.1465	-0.0673377	-0.20532
TCGA-99-7458	0.13794	-0.161786	0.163326	0.0479315	0.125662	0.0283953	0.148956	0.227213	-0.0725624	-0.048718	-0.110643	-0.0697925	-0.0419386	-0.533735	0.160822	0.200589	0.037194	0.083649	0.0210158	0.0078109	0.0436001	-0.0129493	-0.0526645	-0.176876
TCGA-99-8025	0.0154689	-0.20661	0.152985	-0.145656	-0.158053	-0.0425116	0.0239149	0.0972475	-0.120609	-0.0991456	0.0831754	-0.0664057	-0.0316763	-0.533735	-0.138248	0.159065	-0.0179558	0.0496787	-0.0403812	-0.0379505	-0.0542432	0.029691	-0.0533392	-0.32191
TCGA-99-8028	0.234972	-0.0713429	0.20037	0.214132	0.0898022	-0.0149934	0.106741	0.26511	-0.103746	-0.00982523	0.00649944	0.0656327	-0.0373343	-0.533735	0.216892	0.193457	-0.0129128	0.0714276	0.0160109	-0.00807333	0.132046	-0.0417079	-0.0124408	-0.128046
TCGA-99-8032	0.0592634	-0.105885	0.147865	-0.0656881	-0.106087	-0.0184723	0.0278674	0.14044	-0.0159295	-0.0788324	-0.00038452	-0.0696968	-0.0422705	-0.533735	-0.0379463	0.16242	-0.00835479	0.05274	-0.0165684	-0.0621043	-0.000755858	-0.186399	-0.00101369	-0.302301
TCGA-99-8033	0.185929	-0.220346	0.169988	0.127562	-0.0564314	-0.0492902	-0.0153878	0.142627	-0.155618	-0.0329658	-0.0161253	0.0477128	-0.0664498	-0.533735	-0.00997264	0.188284	-0.0121778	0.00247278	-0.05785	-0.0574668	0.0221842	-0.0871874	0.0314324	-0.346277
TCGA-99-AA5R	0.194684	-0.0184368	0.218404	0.227528	0.0606	-0.0187061	0.127963	0.212464	0.00881835	-0.00653851	-0.0478113	-0.000874134	-0.00180094	-0.533735	0.136919	0.193969	0.020274	0.0981191	0.0131068	0.0854161	0.0617594	-0.120329	-0.0934945	-0.317057
TCGA-J2-8192	0.165491	-0.187545	0.147571	-0.0541917	0.0214809	-0.00262414	0.152069	0.27074	-0.000869348	-0.0159997	-0.0947772	-0.0476074	-0.0349438	-0.533735	0.00211714	0.190314	0.029226	0.0614783	-0.0249062	0.0218425	0.0553454	-0.176349	-0.0592088	-0.246578
TCGA-J2-8194	0.0843785	-0.239989	0.172894	-0.0408994	-0.0604108	-0.0092744	0.111142	0.138337	-0.0736871	0.0400839	-0.043921	-0.0732296	-0.0560589	-0.533735	-0.0830856	0.208873	-0.0211188	0.0821756	-0.0444272	0.000716015	0.013202	-0.061298	-0.0934331	-0.333269
TCGA-J2-A4AD	-0.0155274	-0.239736	0.120899	-0.209182	-0.219167	-0.0346894	-0.00264445	0.0934089	-0.138756	-0.147334	0.0102147	-0.116594	-0.0162837	-0.533735	-0.208345	0.18742	-0.0035982	0.0457608	-0.085223	-0.0316953	-0.032499	-0.125794	-0.0111874	-0.442384
TCGA-J2-A4AE	0.141858	-0.0807448	0.182644	0.0224443	0.0677025	0.00371312	0.0400949	0.178373	-0.0439072	-0.0692914	0.0307314	-0.110189	-0.0504751	-0.533735	0.00871221	0.21931	0.0454022	0.0488477	-0.00984983	-0.0783884	0.0737332	-0.0810064	-0.0250631	-0.310747
TCGA-J2-A4AG	0.183783	-0.0788431	0.191541	0.0524915	0.072564	0.00656376	0.136275	0.177296	-0.111089	-0.0828009	-0.00668175	-0.0165681	-0.0611087	-0.533735	0.0637412	0.18102	0.0208047	0.0593567	0.0197684	-0.0829396	0.10322	-0.0486792	-0.0488519	-0.26512
TCGA-L4-A4E5	0.0971728	-0.231947	0.130301	-0.0704413	-0.147902	-0.0599678	-0.00451308	0.0563382	-0.147815	-0.137604	-0.0581679	-0.0522693	-0.0572665	-0.533735	-0.0922599	0.165269	-0.0201742	0.0430526	-0.018242	-0.0231103	-0.0375088	-0.00877248	0.0166439	-0.281817
TCGA-L4-A4E6	0.157415	-0.180127	0.156093	0.0615065	0.050604	-0.0232394	0.19262	0.305147	0.0219607	0.053336	-0.0680519	-0.0649022	-0.0493352	-0.533735	0.0133584	0.175962	0.0144275	0.0790476	-0.0200494	-0.0481737	0.04673	-0.0201551	-0.0909897	-0.331327
TCGA-L9-A443	0.0764631	-0.20758	0.183718	0.0379442	-0.153705	-0.0103884	0.0307832	0.141301	-0.102045	-0.0526225	-0.118281	-0.0287294	-0.0658869	-0.533735	-0.0226853	0.118565	0.0100317	0.066336	0.0324158	-0.0614506	0.0355126	0.00155469	-0.0636852	-0.353267
TCGA-L9-A444	0.212718	-0.0772052	0.184005	0.225083	-0.0363679	-0.0278274	0.0298959	0.1818	-0.125193	-0.119818	-0.0628329	0.0420367	-0.057453	-0.533735	0.183829	0.192042	0.00681926	0.106913	0.0390235	-0.0171312	0.0584015	-0.0117592	-0.0554309	-0.227551
TCGA-L9-A50W	0.0689546	-0.146277	0.165962	-0.0347593	-0.0991755	0.038244	0.101031	0.107033	-0.0473909	-0.0719649	-0.0263053	-0.10053	-0.0382529	-0.533735	-0.0520813	0.1618	0.0133362	0.0305441	0.0312826	-0.0837808	-0.024028	-0.0507072	-0.130494	-0.280361
TCGA-L9-A5IP	-0.0631176	-0.237243	0.164212	-0.0445741	-0.280363	-0.00733735	-0.0353742	0.0532344	-0.0911836	0.0677704	-0.0187874	0.0190849	-0.0883463	-0.533735	-0.119797	0.185981	-0.0252813	-0.00257376	-0.0835886	-0.0465189	-0.0584589	-0.0853768	-0.0338326	-0.280555
TCGA-L9-A743	0.191886	-0.122763	0.187404	0.0853652	0.12582	-0.0124337	0.109481	0.249278	-0.0575478	0.0260746	0.0155108	0.0716218	-0.0495295	-0.533735	0.11524	0.211234	0.00594022	0.062052	0.0184302	-0.0602055	0.10278	-0.0877753	-0.0397546	-0.110086
TCGA-L9-A7SV	0.0222778	-0.218699	0.155468	-0.139952	-0.137317	-0.0437273	-0.0386526	0.0532062	-0.178792	-0.183313	-0.0460563	-0.12844	-0.0584834	-0.533735	-0.143346	0.198124	0.0072528	0.0362859	0.00111388	0.0136342	-0.0940026	0.0710667	-0.0134506	-0.297544
TCGA-L9-A8F4	-0.00977196	-0.133725	0.179534	0.111191	-0.0349889	-0.0504135	0.070236	0.146602	-0.149919	-0.153671	0.0150693	-0.00415997	-0.0534726	-0.533735	0.0943905	0.200232	0.0240955	0.0717832	-0.0310351	-0.0697372	-0.000320743	-0.138353	-0.019513	-0.217455
TCGA-MN-A4N1	-0.0104459	-0.254133	0.0986266	-0.170145	-0.113322	-0.0275216	-0.0123671	0.0945742	-0.193771	-0.147339	0.028285	-0.062174	-0.0345688	-0.533735	-0.143959	0.141251	-0.037911	0.0778783	-0.0252804	-0.0321964	0.00963873	-0.126852	-0.0183075	-0.373944
TCGA-MN-A4N4	-0.148708	-0.194711	0.140872	-0.12857	-0.220434	-0.00412746	0.0281334	0.130776	-0.071501	-0.0973316	-0.0828755	-0.000846925	0.0203112	-0.533735	-0.0942462	0.158982	-0.0126727	0.0270695	-0.035838	-0.0022728	0.0310447	-0.0736741	-0.0446496	-0.369285
TCGA-MN-A4N5	0.243138	-0.226627	0.159386	0.0947591	-0.238063	-0.0546696	0.0175636	0.0813872	-0.180734	-0.0987599	-0.0811853	-0.009758	-0.0411617	-0.533735	0.00806716	0.198287	-0.0102453	0.0673775	-0.000764598	-0.0304494	0.0408276	0.0107876	-0.0723217	-0.326182
TCGA-MP-A4SV	0.191439	-0.179955	0.181826	0.0553758	-0.034349	-0.0296478	0.0550093	0.153446	-0.116677	-0.136037	-0.0876783	-0.011264	-0.0769763	-0.533735	0.0466643	0.223024	0.0199854	0.0585452	-0.0141466	-0.0460455	0.0395986	-0.0836582	-0.0127113	-0.255315
TCGA-MP-A4SW	0.0970367	-0.0953231	0.145396	-0.0679658	-0.0547644	-0.0210936	0.0847907	0.23104	-0.0799284	-0.0712411	-0.0311332	-0.0749435	-0.0595053	-0.533735	-0.0106912	0.185887	-0.0153507	0.0562514	-0.00779198	-0.0846998	0.00971225	-0.0900271	-0.0603784	-0.246772
TCGA-MP-A4SY	-0.0429657	-0.268171	0.122539	-0.177165	-0.139433	-0.0154382	0.0639683	0.187033	-0.0886378	-0.0927938	-0.025431	-0.0726776	-0.0293788	-0.533735	-0.148708	0.160125	0.00591981	0.0392812	-0.0673293	-0.0419909	-0.0218696	-0.126734	-0.0306404	-0.33055
TCGA-MP-A4T4	0.24037	-0.120551	0.166019	0.156303	0.013539	-0.0352826	0.0534747	0.21086	-0.108315	-0.095948	-0.0135738	0.0762272	-0.0393279	-0.533735	0.119469	0.213878	-0.00119254	0.0900139	-0.0282648	-0.0334182	0.0804925	-0.093935	-0.056806	-0.172119
TCGA-MP-A4T6	0.157847	-0.180426	0.165189	-0.0108633	-0.0265938	-0.00423592	0.0463802	0.137348	-0.160172	-0.0831483	0.0386784	-0.0741225	-0.0463819	-0.533735	-0.00549988	0.174125	0.0141521	0.0414712	0.0302854	-0.140729	-0.0334952	0.0227402	-0.1238	-0.296185
TCGA-MP-A4T7	0.143189	-0.246371	0.163661	-0.0358535	0.00488116	-0.0253148	0.0635826	0.132719	-0.112368	-0.0600341	0.0604599	-0.0179383	-0.0807036	-0.533735	-0.0640644	0.195481	-0.0263306	0.0365498	-0.0505614	-0.0138026	0.0146857	0.0187306	-0.0656974	-0.332298
[truncated: 23 more rows]
