# Supplementary material for: Identification of fatty acid-related subtypes, the establishment of a prognostic signature, and immune infiltration characteristics in lung adenocarcinoma
Source: Aging (Albany NY). 2023 May 16;15(10):4202–35. doi: 10.18632/aging.204725 (PMC10258028; doi:10.18632/aging.204725)
Supplement: Supplementary Table 8 [file aging-15-204725-s007.xlsx]

## Sheet: Sheet1
Supplementary Table 8. DEGs results between different FARGs clusters.
id	logFC	AveExpr	t	P.Value	adj.P.Val	B
ADH1B	3.05824	6.61363	41.8884	1.17668e-262	1.31882e-258	590.602
CYP4B1	2.94666	7.94843	31.8633	1.98495e-174	1.11237e-170	388.106
C7	2.20466	7.47673	30.4627	1.95203e-162	7.2928e-159	360.578
ADH1C	2.37935	5.67671	29.7161	4.18119e-156	1.17157e-152	346.046
ACADL	1.54063	4.61159	29.3615	4.08708e-153	9.1616e-150	339.182
ADAMTS8	1.45452	4.90026	28.8105	1.71892e-148	3.21094e-145	328.569
CHRDL1	1.62237	6.45431	28.7913	2.48958e-148	3.98617e-145	328.199
TCF21	1.51383	5.42698	28.7374	7.02305e-148	9.83929e-145	327.165
ABCA8	1.47051	5.103	28.5175	4.8156e-146	5.99702e-143	322.951
KIF2C	-1.17024	6.44469	-28.0203	6.52288e-142	7.31085e-139	313.467
UBE2C	-1.47458	8.43709	-28.0145	7.28757e-142	7.42537e-139	313.356
IL33	1.56517	6.69561	27.8353	2.21619e-140	2.06992e-137	309.952
CDC20	-1.52548	7.14771	-27.6981	3.00935e-139	2.59452e-136	307.352
TPX2	-1.46788	7.43394	-27.6443	8.37276e-139	6.70299e-136	306.332
SFTPC	4.20238	8.79464	27.4715	2.21556e-137	1.65547e-134	303.067
KIF18B	-1.15662	5.96628	-27.4378	4.19932e-137	2.94162e-134	302.429
BIRC5	-1.2693	6.06688	-27.3283	3.33147e-136	2.19642e-133	300.365
CCNB1	-1.19412	7.24692	-27.1341	1.30206e-134	8.10752e-132	296.711
KIF4A	-1.25761	6.23751	-26.7535	1.66826e-131	9.34891e-129	289.578
HJURP	-1.32337	6.15178	-26.7179	3.2483e-131	1.73366e-128	288.914
CACNA2D2	1.9018	6.83099	26.4829	2.63627e-129	1.34306e-126	284.532
CDKN3	-1.22196	6.48007	-26.3222	5.27868e-128	2.57232e-125	281.544
SFTPD	2.51828	9.11605	26.3168	5.83812e-128	2.7264e-125	281.444
SELENBP1	1.43161	9.74052	26.2401	2.43354e-127	1.09101e-124	280.021
FHL5	1.16798	4.54596	26.0312	1.17779e-125	4.88912e-123	276.154
CDCA3	-1.25217	6.01741	-26.01	1.74474e-125	6.98396e-123	275.763
MELK	-1.38966	6.76171	-25.989	2.5723e-125	9.9415e-123	275.376
RRM2	-1.28932	7.75752	-25.916	9.93647e-125	3.71227e-122	274.029
CDCA8	-1.44446	6.53569	-25.8573	2.94746e-124	1.06565e-121	272.945
DUOX1	1.42758	5.77304	25.8373	4.26022e-124	1.49214e-121	272.578
CCNA2	-1.12626	6.44623	-25.5583	7.30969e-122	2.48263e-119	267.449
SPARCL1	1.09478	10.1724	25.5228	1.40497e-121	4.63145e-119	266.798
NEK2	-1.17689	5.54558	-25.4111	1.09132e-120	3.39763e-118	264.755
MGP	1.15897	10.274	25.3977	1.396e-120	4.22875e-118	264.509
TROAP	-1.06853	5.5873	-25.3893	1.63074e-120	4.80981e-118	264.355
DLGAP5	-1.36321	6.22276	-25.3676	2.42529e-120	6.9699e-118	263.959
CEP55	-1.29299	7.0829	-25.0932	3.67038e-118	1.02844e-115	258.956
MKI67	-1.0483	6.33811	-25.0702	5.58426e-118	1.52654e-115	258.538
GTSE1	-1.0069	5.43452	-25.0371	1.02132e-117	2.72546e-115	257.936
MCM10	-1.31529	4.96055	-24.89	1.48511e-116	3.87096e-114	255.268
ESPL1	-1.0108	5.8069	-24.8604	2.54558e-116	6.4843e-114	254.731
PLA2G1B	2.06184	5.81644	24.856	2.75798e-116	6.86922e-114	254.651
MYBL2	-1.56003	6.31585	-24.8213	5.17254e-116	1.2603e-113	254.024
EMCN	1.29207	6.01694	24.7987	7.79865e-116	1.85973e-113	253.615
SCN7A	1.28536	4.8036	24.6598	9.66455e-115	2.25667e-112	251.106
CTSH	1.12339	10.6664	24.6284	1.70641e-114	3.90315e-112	250.54
TK1	-1.02603	7.61208	-24.6075	2.49007e-114	5.4723e-112	250.163
NCAPG	-1.09707	5.51948	-24.5945	3.15369e-114	6.79742e-112	249.927
NR3C2	1.06258	5.91976	24.5613	5.74753e-114	1.21544e-111	249.329
WIF1	2.62201	6.25752	24.5313	9.86984e-114	2.04854e-111	248.79
KIF14	-1.08652	5.162	-24.525	1.10565e-113	2.25311e-111	248.677
CHEK1	-1.06965	5.53305	-24.5154	1.31617e-113	2.63422e-111	248.504
FOXM1	-1.33692	6.8501	-24.414	8.19175e-113	1.61076e-110	246.681
FBLN5	1.0365	8.07524	24.4029	9.99888e-113	1.9322e-110	246.483
CDC6	-1.09893	5.80611	-24.3802	1.5065e-112	2.86184e-110	246.074
TOP2A	-1.33905	7.88268	-24.2967	6.76794e-112	1.26425e-109	244.577
AGER	1.89837	6.91212	24.2424	1.79415e-111	3.29654e-109	243.605
BUB1B	-1.07206	6.3879	-24.1915	4.47351e-111	8.08696e-109	242.695
AURKA	-1.11467	6.94738	-24.0608	4.64987e-110	8.14309e-108	240.361
FAM107A	1.22152	5.4604	24.0452	6.14982e-110	1.06042e-107	240.083
SPHK1	-1.01629	6.37207	-24.0298	8.09886e-110	1.37533e-107	239.808
UBE2S	-1.08423	6.76313	-24.0041	1.28292e-109	2.14611e-107	239.35
PLK1	-1.01288	5.89693	-23.9643	2.61108e-109	4.30367e-107	238.642
CENPF	-1.11087	6.02018	-23.9538	3.14869e-109	5.0415e-107	238.455
MFAP4	1.59829	8.32911	23.8617	1.62741e-108	2.56901e-106	236.818
KIF20A	-1.04534	6.62509	-23.8548	1.84098e-108	2.86579e-106	236.695
AURKB	-1.13036	6.0298	-23.8119	3.95425e-108	6.07113e-106	235.933
RECQL4	-1.07442	5.27864	-23.7115	2.35905e-107	3.47897e-105	234.153
CDK1	-1.07937	6.90267	-23.69	3.4521e-107	5.02483e-105	233.774
ANGPT1	1.02367	5.82722	23.5461	4.43563e-106	6.21432e-104	231.229
FMO2	1.17675	7.43448	23.475	1.56034e-105	2.15905e-103	229.976
TTK	-1.17733	5.57412	-23.4709	1.67786e-105	2.29334e-103	229.903
CLDN18	2.51503	5.51836	23.2781	5.02818e-104	6.55301e-102	226.515
CDC45	-1.47931	5.25472	-23.2591	7.02049e-104	9.04433e-102	226.182
MAD2L1	-1.06288	6.06817	-23.2438	9.19271e-104	1.17082e-101	225.914
ITGA8	1.01503	6.16509	23.196	2.13075e-103	2.68331e-101	225.076
TSPAN7	1.33525	7.04297	23.1112	9.44789e-103	1.151e-100	223.592
CLU	1.37304	9.59557	23.0758	1.75693e-102	2.11739e-100	222.974
FHL1	1.05775	6.50949	23.0264	4.16972e-102	4.97172e-100	222.113
MCM4	-1.00505	6.44033	-23.0142	5.16983e-102	6.09931e-100	221.898
RAD54L	-1.0642	4.81481	-22.9961	7.08651e-102	8.2735e-100	221.584
CENPE	-1.22997	4.94492	-22.9549	1.45709e-101	1.68361e-99	220.866
KIFC1	-1.25378	5.90962	-22.8897	4.54839e-101	5.12363e-99	219.731
CDT1	-1.03887	5.68915	-22.8894	4.5714e-101	5.12363e-99	219.726
SLPI	1.64187	11.074	22.8069	1.92826e-100	2.11882e-98	218.292
KIF15	-1.0254	5.15214	-22.7637	4.08743e-100	4.44776e-98	217.543
DEPDC1	-1.09863	4.96437	-22.7377	6.43103e-100	6.86467e-98	217.092
KIF23	-1.13458	5.15161	-22.6084	6.07026e-99	6.35846e-97	214.855
HMMR	-1.05961	6.56973	-22.5916	8.12704e-99	8.43407e-97	214.564
C4BPA	2.06708	9.79199	22.532	2.28238e-98	2.34687e-96	213.535
TRIP13	-1.13388	7.09787	-22.5236	2.6393e-98	2.68921e-96	213.39
ASPM	-1.2499	5.87084	-22.4838	5.255e-98	5.30613e-96	212.704
PRG4	1.43735	4.66866	22.4469	9.93035e-98	9.8495e-96	212.07
NCAPH	-1.07832	4.8347	-22.4134	1.77221e-97	1.71232e-95	211.493
EXO1	-1.14662	5.32173	-22.3758	3.39262e-97	3.24996e-95	210.846
CAPN3	1.06028	5.40028	22.2926	1.42221e-96	1.3395e-94	209.418
CA3	1.40543	4.73159	22.1485	1.68968e-95	1.55229e-93	206.952
FLRT3	1.33986	7.74747	22.1094	3.30587e-95	3.01238e-93	206.283
AQP4	1.78521	5.91153	22.0227	1.45722e-94	1.3066e-92	204.805
ITIH5	1.04579	5.66096	21.9971	2.25571e-94	2.00651e-92	204.37
TPPP3	1.57395	6.94655	21.8227	4.41181e-93	3.83314e-91	201.407
HIGD1B	1.05169	5.77234	21.8203	4.59865e-93	3.96474e-91	201.366
TBX4	1.09439	4.90622	21.786	8.23549e-93	6.99268e-91	200.785
SLC22A3	1.49278	6.2455	21.733	2.02898e-92	1.70983e-90	199.887
VIPR1	1.07739	5.81242	21.5887	2.33576e-91	1.91089e-89	197.452
FOLR1	1.70887	9.49026	21.5738	3.00545e-91	2.44095e-89	197.201
ZBTB16	1.37709	6.20264	21.5575	3.96084e-91	3.19375e-89	196.926
PBK	-1.24765	5.93779	-21.5512	4.40202e-91	3.52413e-89	196.821
GDF10	1.25728	5.07757	21.5266	6.6711e-91	5.22865e-89	196.407
NDNF	1.43969	8.51292	21.5077	9.17602e-91	7.09274e-89	196.089
MAOA	1.12157	8.32802	21.4539	2.27428e-90	1.7459e-88	195.185
MMRN1	1.16003	4.9455	21.4108	4.69779e-90	3.55762e-88	194.462
PGC	2.79886	8.25561	21.3914	6.51778e-90	4.87008e-88	194.136
TMEM100	1.42349	6.02294	21.3002	3.01707e-89	2.22469e-87	192.609
HLF	1.38807	6.112	21.1708	2.63789e-88	1.88315e-86	190.449
RAD51AP1	-1.03279	6.29411	-21.1191	6.25589e-88	4.43772e-86	189.589
TMPRSS2	1.32271	7.71686	21.0783	1.23533e-87	8.65346e-86	188.911
PRSS12	1.20951	4.98708	21.0589	1.70837e-87	1.18928e-85	188.588
PLOD2	-1.07095	8.07325	-21.0558	1.79972e-87	1.24514e-85	188.536
COL11A1	-2.24375	6.61215	-20.9869	5.67038e-87	3.87522e-85	187.393
SCTR	1.57681	5.55818	20.9628	8.47034e-87	5.71901e-85	186.993
SCGB1A1	2.98345	7.92028	20.8569	4.91337e-86	3.29755e-84	185.242
VWF	1.06383	8.65655	20.8006	1.24957e-85	8.28706e-84	184.312
LAMP3	1.3051	9.24653	20.7882	1.53269e-85	1.01049e-83	184.109
ERCC6L	-1.00871	4.43022	-20.7796	1.76646e-85	1.15781e-83	183.967
PLLP	1.03716	7.108	20.7184	4.8603e-85	3.1307e-83	182.959
FCER1A	1.40542	5.84581	20.6699	1.08337e-84	6.82158e-83	182.16
AOC3	1.00219	7.97156	20.6249	2.27372e-84	1.42368e-82	181.422
NDC80	-1.16896	5.96787	-20.6237	2.31965e-84	1.44437e-82	181.402
ABI3BP	1.05843	5.65132	20.6216	2.39926e-84	1.48568e-82	181.368
RAP1GAP	1.21851	7.51645	20.5857	4.33152e-84	2.66745e-82	180.78
SFTPB	2.0432	11.9408	20.572	5.43185e-84	3.32678e-82	180.554
HSD17B6	1.45396	7.19431	20.5692	5.68376e-84	3.46215e-82	180.509
SPOCK1	-1.30478	5.51584	-20.5213	1.2491e-83	7.52681e-82	179.725
SLC2A1	-1.07145	7.86289	-20.4683	2.97945e-83	1.74836e-81	178.859
LRRC36	1.33477	5.22999	20.4417	4.61449e-83	2.66594e-81	178.423
PTGDS	1.13285	7.86013	20.4118	7.52226e-83	4.30151e-81	177.936
TMEM158	-1.27478	6.0477	-20.3517	2.01171e-82	1.13302e-80	176.957
CRTAC1	1.30908	6.43289	20.2125	1.94723e-81	1.06983e-79	174.695
ADAM12	-1.15406	5.74346	-19.8894	3.6471e-79	1.87508e-77	169.483
GPM6A	1.07711	3.91947	19.8025	1.4788e-78	7.49973e-77	168.089
SORBS2	1.04845	5.86784	19.7985	1.5752e-78	7.95261e-77	168.026
CLIC5	1.09284	5.35201	19.6311	2.30546e-77	1.13831e-75	165.354
CFTR	1.26113	4.84425	19.5199	1.36092e-76	6.43594e-75	163.585
MYH11	1.19011	6.301	19.4804	2.55384e-76	1.20266e-74	162.959
C1orf116	1.57692	8.63789	19.4412	4.76279e-76	2.22422e-74	162.338
CYBRD1	1.19529	7.91765	19.4252	6.14288e-76	2.84502e-74	162.084
PIGR	1.71741	9.89174	19.3804	1.25072e-75	5.76874e-74	161.376
CD1C	1.28374	5.86612	19.3363	2.51302e-75	1.14963e-73	160.681
ELN	1.02471	6.85393	19.3246	3.02647e-75	1.37889e-73	160.496
TWIST1	-1.17058	5.64341	-19.2896	5.26642e-75	2.37052e-73	159.945
GINS2	-1.05894	5.82745	-19.1857	2.71728e-74	1.18966e-72	158.311
FABP4	1.37532	6.01264	19.1415	5.44415e-74	2.34685e-72	157.619
CPB2	1.63288	4.86969	18.9782	7.07231e-73	2.97994e-71	155.065
RNASE1	1.09287	11.4555	18.9517	1.07009e-72	4.4586e-71	154.653
CPA3	1.25398	8.06939	18.8781	3.37888e-72	1.37711e-70	153.508
ALDH1A1	1.21134	8.6008	18.8144	9.11473e-72	3.6485e-70	152.52
DMBT1	1.90397	7.75741	18.5727	3.85829e-70	1.50152e-68	148.79
CFD	1.02464	7.63703	18.3005	2.52794e-68	9.44438e-67	144.626
ALPL	1.3229	7.48262	18.1101	4.59203e-67	1.66562e-65	141.739
ABCA3	1.23453	7.71637	18.1082	4.72798e-67	1.70939e-65	141.71
SYBU	1.02358	6.82291	18.039	1.34902e-66	4.79996e-65	140.666
FOXA2	1.32023	6.72474	18.0126	2.01289e-66	7.11687e-65	140.268
FCN3	1.27024	6.45101	17.9712	3.76614e-66	1.32323e-64	139.644
LPL	1.22648	7.77315	17.9365	6.35397e-66	2.21166e-64	139.124
SOSTDC1	1.54707	3.681	17.928	7.22043e-66	2.49773e-64	138.996
CHIA	1.35696	5.18486	17.8499	2.34045e-65	7.97318e-64	137.826
FMO5	1.25265	7.04093	17.7826	6.42793e-65	2.13781e-63	136.82
MAOB	1.00233	6.45168	17.6646	3.75629e-64	1.22742e-62	135.063
CRYM	1.35986	7.45296	17.3955	2.04495e-62	6.45628e-61	131.084
AADAC	1.46037	4.8095	17.1889	4.27392e-61	1.30523e-59	128.058
KCNJ15	1.12671	6.61964	17.0062	6.15606e-60	1.80149e-58	125.404
GSTA1	1.48396	6.71042	16.874	4.18476e-59	1.18741e-57	123.496
CTSE	1.67582	9.2977	16.6834	6.52085e-58	1.76536e-56	120.764
C6	1.01341	4.73248	16.5891	2.5171e-57	6.74921e-56	119.42
TNNC1	1.39609	5.54056	16.529	5.93435e-57	1.56868e-55	118.566
SCN1A	1.12418	4.1443	16.3812	4.84677e-56	1.22902e-54	116.477
GPC3	1.0243	7.01769	16.2688	2.37196e-55	5.90777e-54	114.897
RASGRF1	1.00995	4.20083	16.1389	1.47253e-54	3.58785e-53	113.08
SLC44A4	1.03616	7.95011	16.1248	1.79251e-54	4.34858e-53	112.884
ROS1	1.11206	6.23229	16.0769	3.50762e-54	8.32912e-53	112.217
SPINK5	1.39054	6.38331	15.9787	1.37876e-53	3.21941e-52	110.855
TSPAN8	1.56249	8.68386	15.8768	5.67262e-53	1.28702e-51	109.448
TNNT1	-1.61835	5.27192	-15.6062	2.34871e-51	4.99514e-50	105.744
GREM1	-1.3465	6.90208	-15.6028	2.46125e-51	5.22457e-50	105.698
GJB1	1.28497	5.9482	15.5275	6.87799e-51	1.44631e-49	104.676
AGTR2	1.169	3.88481	15.469	1.52436e-50	3.16388e-49	103.884
FOSB	1.63247	7.15092	15.4234	2.82701e-50	5.81379e-49	103.27
HBB	1.24199	8.57866	15.3823	4.936e-50	1.00404e-48	102.716
AQP3	1.04652	9.71217	15.3645	6.27763e-50	1.27463e-48	102.476
OGN	1.14979	4.59987	15.2832	1.88108e-49	3.74478e-48	101.385
AQP1	1.06109	9.67472	15.2777	2.02446e-49	4.02308e-48	101.312
HOPX	1.17256	9.23388	15.212	4.89195e-49	9.56876e-48	100.435
HPGD	1.36181	7.44656	15.1894	6.6269e-49	1.29398e-47	100.133
LRRC31	1.33952	4.9432	15.1053	2.04191e-48	3.87237e-47	99.0137
ALDH3A1	1.47836	5.50448	14.8404	6.84233e-47	1.22506e-45	95.522
SCGB2A1	1.54032	4.86138	14.6887	5.00029e-46	8.72949e-45	93.5446
LRRC15	-1.07085	6.6902	-14.4783	7.69898e-45	1.28599e-43	90.8267
IGF2BP3	-1.10995	5.75927	-14.2599	1.27423e-43	2.03152e-42	88.0373
MMP12	-1.38516	7.72838	-14.2559	1.34067e-43	2.1344e-42	87.9867
APOD	1.10606	8.55207	14.1142	8.13032e-43	1.26037e-41	86.1954
FGFR3	1.04927	7.32013	14.0827	1.21209e-42	1.85842e-41	85.7986
SLC34A2	1.09233	9.80735	14.0403	2.0708e-42	3.13219e-41	85.2664
LMO3	1.03476	7.82278	13.9875	4.02586e-42	6.00823e-41	84.6058
ELF5	1.13526	5.75442	13.3987	5.88064e-39	7.7884e-38	77.3666
CEACAM8	1.04251	3.10533	13.2342	4.30504e-38	5.45208e-37	75.3894
MMP28	1.04157	5.33131	13.1625	1.01918e-37	1.27063e-36	74.5336
ALOX15B	1.00206	7.49108	12.9578	1.16865e-36	1.39047e-35	72.1113
EPYC	-1.01257	3.637	-12.7634	1.15236e-35	1.30329e-34	69.8392
HMGCS2	1.06227	3.97944	12.5934	8.32856e-35	9.07157e-34	67.8758
LGALS4	1.40116	5.68165	12.5749	1.03158e-34	1.12143e-33	67.6634
LTF	1.42976	7.76255	12.4084	6.99641e-34	7.35608e-33	65.7635
PCSK2	1.06112	4.08622	11.6458	3.42522e-30	2.95989e-29	57.3354
TMPRSS11E	-1.09418	4.58761	-10.8904	9.92076e-27	7.34424e-26	49.4351
CHIT1	1.04137	6.58868	10.6557	1.07554e-25	7.55034e-25	47.0746
MSLN	1.33162	7.7557	9.89337	1.82196e-22	1.09142e-21	39.7171
AQP5	1.05693	5.78263	9.78068	5.25066e-22	3.0779e-21	38.6705
MMP1	-1.05297	7.93143	-9.27031	5.54834e-20	2.8991e-19	34.0654
KRT6A	-1.19894	5.43878	-9.13005	1.92159e-19	9.69708e-19	32.8387
PAEP	-1.1741	5.16508	-8.45279	6.11009e-17	2.6564e-16	27.1552
SPINK1	1.08523	8.54103	7.88463	5.65289e-15	2.19534e-14	22.698
FGB	-1.00616	4.97258	-7.26446	5.72385e-13	1.96007e-12	18.1621
