# Supplementary material for: Identification of fatty acid-related subtypes, the establishment of a prognostic signature, and immune infiltration characteristics in lung adenocarcinoma
Source: Aging (Albany NY). 2023 May 16;15(10):4202–35. doi: 10.18632/aging.204725 (PMC10258028; doi:10.18632/aging.204725)
Supplement: Supplementary Table 9 [file aging-15-204725-s008.xlsx]

## Sheet: Sheet1
Supplementary Table 9. GO and KEGG functional enrichment analysis of DEGs.
ONTOLOGY	ID	Term	GeneRatio	BgRatio	pvalue	p.adjust	qvalue	geneID	Count
BP	GO:0032496	mitotic nuclear division	32/217	237/17910	2.25e-24	8.88e-21	6.69e-21	KIF2C/UBE2C/CDC20/TPX2/CCNB1/KIF4A/CDCA8/NEK2/DLGAP5/MKI67/ESPL1/MYBL2/NCAPG/KIF14/CHEK1/CDC6/BUB1B/AURKA/SPHK1/UBE2S/PLK1/CENPF/AURKB/TTK/MAD2L1/CENPE/KIFC1/CDT1/KIF23/TRIP13/NCAPH/NDC80	32
BP	GO:0009410	mitotic sister chromatid segregation	24/217	132/17910	1.2e-21	2.36e-18	1.78e-18	KIF2C/CDC20/CCNB1/KIF4A/CDCA8/NEK2/DLGAP5/ESPL1/NCAPG/KIF14/CDC6/BUB1B/PLK1/CENPF/AURKB/TTK/MAD2L1/CENPE/KIFC1/CDT1/KIF23/TRIP13/NCAPH/NDC80	24
BP	GO:0070482	nuclear division	34/217	357/17910	7.34e-21	9.64e-18	7.27e-18	KIF2C/UBE2C/CDC20/TPX2/CCNB1/KIF4A/CDCA8/NEK2/DLGAP5/MKI67/ESPL1/MYBL2/NCAPG/KIF14/CHEK1/CDC6/TOP2A/BUB1B/AURKA/SPHK1/UBE2S/PLK1/CENPF/AURKB/TTK/MAD2L1/CENPE/KIFC1/CDT1/KIF23/TRIP13/ASPM/NCAPH/NDC80	34
BP	GO:0000302	sister chromatid segregation	24/217	157/17910	8.61e-20	0.0000000000000000849	0.000000000000000064	KIF2C/CDC20/CCNB1/KIF4A/CDCA8/NEK2/DLGAP5/ESPL1/NCAPG/KIF14/CDC6/BUB1B/PLK1/CENPF/AURKB/TTK/MAD2L1/CENPE/KIFC1/CDT1/KIF23/TRIP13/NCAPH/NDC80	24
BP	GO:0035690	organelle fission	34/217	395/17910	1.83e-19	0.000000000000000122	0.0000000000000000919	KIF2C/UBE2C/CDC20/TPX2/CCNB1/KIF4A/CDCA8/NEK2/DLGAP5/MKI67/ESPL1/MYBL2/NCAPG/KIF14/CHEK1/CDC6/TOP2A/BUB1B/AURKA/SPHK1/UBE2S/PLK1/CENPF/AURKB/TTK/MAD2L1/CENPE/KIFC1/CDT1/KIF23/TRIP13/ASPM/NCAPH/NDC80	34
CC	GO:0006979	extracellular region part	90/217	3312/18675	1.8e-16	0.000000000000078	0.0000000000000562	C7/ADAMTS8/IL33/TPX2/SFTPC/KIF4A/SELENBP1/CDCA8/SPARCL1/MGP/CEP55/PLA2G1B/CTSH/CHEK1/FBLN5/MFAP4/KIF20A/CDK1/ANGPT1/CLU/SLPI/KIF23/C4BPA/PRG4/FLRT3/ITIH5/FOLR1/GDF10/NDNF/MMRN1/PGC/TMPRSS2/PLOD2/COL11A1/SCGB1A1/VWF/ABI3BP/SPOCK1/SLC2A1/PTGDS/CRTAC1/GPM6A/CLIC5/MYH11/C1orf116/CYBRD1/PIGR/ELN/FABP4/CPB2/RNASE1/CPA3/ALDH1A1/DMBT1/CFD/ALPL/ABCA3/FCN3/LPL/SOSTDC1/CHIA/CRYM/GSTA1/C6/GPC3/SLC44A4/TSPAN8…	90
CC	GO:0048545	extracellular region	101/217	4295/18675	1.6e-14	0.00000000000347	0.0000000000025	C7/ADAMTS8/CHRDL1/IL33/TPX2/SFTPC/KIF4A/SFTPD/SELENBP1/CDCA8/SPARCL1/MGP/CEP55/PLA2G1B/EMCN/CTSH/CHEK1/FBLN5/AGER/MFAP4/KIF20A/CDK1/ANGPT1/CLU/SLPI/KIF23/C4BPA/PRG4/FLRT3/ITIH5/FOLR1/GDF10/NDNF/MMRN1/PGC/TMPRSS2/PLOD2/COL11A1/SCGB1A1/VWF/ABI3BP/SFTPB/SPOCK1/SLC2A1/PTGDS/CRTAC1/ADAM12/GPM6A/CLIC5/MYH11/C1orf116/CYBRD1/PIGR/ELN/FABP4/CPB2/RNASE1/CPA3/ALDH1A1/DMBT1/CFD/ALPL/ABCA3/FCN3/LPL/SOSTDC1/CH…	101
CC	GO:0034599	extracellular matrix	29/217	468/18675	1.87e-13	0.000000000027	0.0000000000195	ADAMTS8/SPARCL1/MGP/CTSH/FBLN5/MFAP4/CLU/SLPI/PRG4/FLRT3/ITIH5/GDF10/NDNF/MMRN1/COL11A1/VWF/ABI3BP/ELN/CPA3/ALPL/GPC3/GREM1/OGN/LRRC15/MMP12/MMP28/LGALS4/MMP1/FGB	29
CC	GO:0036293	condensed chromosome	19/217	199/18675	2.01e-12	0.000000000219	0.000000000157	KIF2C/BIRC5/CCNB1/HJURP/NEK2/MKI67/NCAPG/CHEK1/TOP2A/BUB1B/PLK1/CENPF/AURKB/MAD2L1/CENPE/CDT1/NCAPH/ERCC6L/NDC80	19
CC	GO:1901654	condensed chromosome, centromeric region	15/217	110/18675	2.6e-12	0.000000000226	0.000000000162	KIF2C/BIRC5/CCNB1/HJURP/NEK2/NCAPG/BUB1B/PLK1/CENPF/AURKB/MAD2L1/CENPE/CDT1/ERCC6L/NDC80	15
MF	GO:0045121	small molecule binding	55/212	2340/16967	1.75e-06	0.000687573	0.000517699	CYP4B1/ACADL/ABCA8/KIF2C/UBE2C/KIF18B/KIF4A/MELK/DUOX1/NEK2/MKI67/PLA2G1B/TK1/KIF14/CHEK1/CDC6/TOP2A/BUB1B/AURKA/SPHK1/UBE2S/PLK1/KIF20A/AURKB/RECQL4/CDK1/FMO2/TTK/MCM4/RAD54L/CENPE/KIFC1/KIF15/KIF23/HMMR/TRIP13/FOLR1/PBK/PLOD2/ERCC6L/PTGDS/CFTR/MYH11/FABP4/ALDH1A1/ABCA3/FMO5/MAOB/CRYM/ROS1/HBB/HPGD/APOD/FGFR3/PAEP	55
MF	GO:0098857	water channel activity	4/212	9/16967	2.84e-06	0.000687573	0.000517699	AQP4/AQP3/AQP1/AQP5	4
MF	GO:0098589	water transmembrane transporter activity	4/212	10/16967	4.69e-06	0.000687573	0.000517699	AQP4/AQP3/AQP1/AQP5	4
MF	GO:0099056	extracellular matrix structural constituent	11/212	158/16967	4.83e-06	0.000687573	0.000517699	MGP/FBLN5/MFAP4/PRG4/MMRN1/COL11A1/VWF/ABI3BP/ELN/OGN/FGB	11
MF	GO:0090575	drug binding	42/212	1658/16967	6.67e-06	0.000759444	0.000571813	CYP4B1/ABCA8/KIF2C/UBE2C/KIF18B/KIF4A/MELK/NEK2/MKI67/TK1/KIF14/CHEK1/CDC6/TOP2A/BUB1B/AURKA/SPHK1/UBE2S/PLK1/KIF20A/AURKB/RECQL4/CDK1/TTK/MCM4/RAD54L/CENPE/KIFC1/KIF15/KIF23/TRIP13/FOLR1/PBK/SCGB1A1/ERCC6L/CFTR/MYH11/ABCA3/ROS1/HBB/FGFR3/CHIT1	42
Category	Term	Count	%	PValue	Genes	List Total	Pop Hits	Pop Total	Fold Enrichment	Bonferroni	Benjamini	FDR
KEGG_PATHWAY	hsa04110:Cell cycle	13	5.85585585585585	2.11810519489934E-07	PLK1, BUB1B, TTK, CDC6, CCNA2, CDC20, CCNB1, CDC45, ESPL1, CHEK1, CDK1, MCM4, MAD2L1	118	126	8156	7.13128867366155	0.0000374897631556514	0.0000374904619497183	0.0000368550303912485
KEGG_PATHWAY	hsa00982:Drug metabolism - cytochrome P450	8	3.6036036036036	0.0000711963595101202	ALDH3A1, MAOB, ADH1C, MAOA, ADH1B, GSTA1, FMO2, FMO5	118	72	8156	7.67984934086629	0.0125231290008339	0.00630087781664564	0.00619408327738046
KEGG_PATHWAY	hsa00350:Tyrosine metabolism	6	2.7027027027027	0.000147334391657256	AOC3, ALDH3A1, MAOB, ADH1C, MAOA, ADH1B	118	36	8156	11.5197740112994	0.0257429599034469	0.00869272910777815	0.00854539471612089
KEGG_PATHWAY	hsa04610:Complement and coagulation cascades	8	3.6036036036036	0.000204633007897718	FGB, CFD, CPB2, C6, C7, VWF, C4BPA, CLU	118	85	8156	6.50528414755732	0.0355755194913719	0.00905501059947403	0.00890153584355074
KEGG_PATHWAY	hsa00360:Phenylalanine metabolism	4	1.8018018018018	0.00140591445833168	AOC3, ALDH3A1, MAOB, MAOA	118	16	8156	17.2796610169491	0.220437139730316	0.0497693718249416	0.0489258231499426
