# Supplementary material for: Identification of fatty acid-related subtypes, the establishment of a prognostic signature, and immune infiltration characteristics in lung adenocarcinoma
Source: Aging (Albany NY). 2023 May 16;15(10):4202–35. doi: 10.18632/aging.204725 (PMC10258028; doi:10.18632/aging.204725)
Supplement: Supplementary Table 10 [file aging-15-204725-s009.xlsx]

## Sheet: Sheet1
Supplementary Table 10. Unicox analysis results for DEGs.
id	HR	HR.95L	HR.95H	pvalue
ADH1B	0.906888	0.87251	0.942621	7.16385e-07
CYP4B1	0.896229	0.866743	0.926719	1.37362e-10
C7	0.92437	0.88354	0.967088	0.000645147
ADH1C	0.918714	0.880584	0.958496	8.8573e-05
ACADL	0.909868	0.853896	0.969508	0.0035465
ADAMTS8	0.855698	0.799431	0.915926	7.10406e-06
CHRDL1	0.868125	0.819945	0.919135	1.20727e-06
TCF21	0.857473	0.801059	0.917859	9.49051e-06
ABCA8	0.865577	0.810651	0.924225	1.5906e-05
KIF2C	1.28235	1.18181	1.39144	2.37266e-09
UBE2C	1.19605	1.12158	1.27546	4.81158e-08
IL33	0.900152	0.848669	0.954758	0.000464061
CDC20	1.19731	1.12496	1.27432	1.49176e-08
TPX2	1.24867	1.16904	1.33372	3.96619e-11
SFTPC	0.955841	0.93529	0.976844	4.6504e-05
KIF18B	1.26105	1.16326	1.36707	1.78491e-08
BIRC5	1.24972	1.1587	1.34789	7.56018e-09
CCNB1	1.27962	1.18339	1.38367	6.36245e-10
KIF4A	1.26016	1.17027	1.35695	9.11442e-10
HJURP	1.28354	1.19588	1.37763	4.6403e-12
CACNA2D2	0.863207	0.823751	0.904554	7.17161e-10
CDKN3	1.26835	1.18021	1.36307	9.86987e-11
SFTPD	0.919589	0.888555	0.951706	1.70173e-06
SELENBP1	0.84423	0.794523	0.897047	4.52488e-08
FHL5	0.866181	0.801172	0.936466	0.00030738
CDCA3	1.2369	1.15101	1.32919	7.03675e-09
MELK	1.22009	1.1446	1.30055	1.03189e-09
RRM2	1.30187	1.21104	1.39951	8.74197e-13
CDCA8	1.19197	1.11798	1.27085	7.81912e-08
DUOX1	0.917861	0.861641	0.977749	0.00786722
CCNA2	1.30166	1.20285	1.4086	5.95826e-11
SPARCL1	0.891063	0.819067	0.969387	0.00729074
NEK2	1.29938	1.20492	1.40125	1.03983e-11
MGP	0.857555	0.7994	0.919941	1.79509e-05
TROAP	1.21067	1.11522	1.31429	5.05153e-06
DLGAP5	1.25268	1.17259	1.33825	2.34244e-11
CEP55	1.24742	1.16409	1.3367	3.66182e-10
MKI67	1.29739	1.19189	1.41223	1.78125e-09
GTSE1	1.24134	1.13867	1.35327	9.19159e-07
MCM10	1.23129	1.15182	1.31623	9.81789e-10
ESPL1	1.27409	1.17071	1.38661	2.01935e-08
PLA2G1B	0.899125	0.860572	0.939405	1.97952e-06
MYBL2	1.16859	1.10484	1.23603	5.23252e-08
EMCN	0.911753	0.851608	0.976146	0.00796925
SCN7A	0.864428	0.808849	0.923826	1.7335e-05
CTSH	0.784944	0.728876	0.845326	1.51455e-10
TK1	1.30966	1.20031	1.42898	1.32745e-09
NCAPG	1.25377	1.16092	1.35406	8.3904e-09
NR3C2	0.826666	0.762285	0.896484	4.19487e-06
WIF1	0.94734	0.916821	0.978875	0.00120414
KIF14	1.31251	1.21248	1.42078	1.76967e-11
CHEK1	1.32241	1.22275	1.4302	2.74116e-12
FOXM1	1.25796	1.17767	1.34374	9.1427e-12
FBLN5	0.840123	0.774962	0.910762	2.34524e-05
CDC6	1.31743	1.21674	1.42646	1.07881e-11
TOP2A	1.16963	1.09544	1.24884	2.783e-06
AGER	0.909976	0.867905	0.954087	9.384e-05
BUB1B	1.3178	1.21658	1.42745	1.31122e-11
AURKA	1.23923	1.14755	1.33822	4.50551e-08
FAM107A	0.900804	0.83599	0.970643	0.0061052
SPHK1	1.26098	1.16418	1.36583	1.26893e-08
UBE2S	1.23947	1.14609	1.34046	7.79805e-08
PLK1	1.33363	1.2216	1.45592	1.26415e-10
CENPF	1.24423	1.15241	1.34337	2.31545e-08
MFAP4	0.882655	0.840465	0.926963	5.88903e-07
KIF20A	1.25885	1.15618	1.37063	1.13849e-07
AURKB	1.2065	1.11935	1.30044	9.23466e-07
RECQL4	1.19575	1.10687	1.29176	5.71583e-06
CDK1	1.29309	1.19686	1.39706	7.30191e-11
ANGPT1	0.85011	0.78135	0.924921	0.000160884
FMO2	0.862796	0.803283	0.926717	5.18647e-05
TTK	1.22055	1.13626	1.31109	4.79845e-08
CLDN18	0.93253	0.900614	0.965578	8.44722e-05
CDC45	1.17253	1.10917	1.2395	1.95642e-08
MAD2L1	1.30922	1.21111	1.41527	1.20412e-11
ITGA8	0.859095	0.791895	0.931997	0.00025753
TSPAN7	0.886657	0.832424	0.944423	0.000187256
CLU	0.920679	0.870229	0.974054	0.00404997
FHL1	0.860003	0.791971	0.933878	0.000334556
MCM4	1.30719	1.20558	1.41737	8.69057e-11
RAD54L	1.17857	1.08873	1.27583	4.88065e-05
CENPE	1.21702	1.13789	1.30165	1.02785e-08
KIFC1	1.19033	1.1155	1.27018	1.44502e-07
CDT1	1.22186	1.12316	1.32923	3.12239e-06
KIF15	1.21783	1.12438	1.31904	1.31131e-06
DEPDC1	1.21983	1.1319	1.31458	1.92828e-07
KIF23	1.25632	1.17072	1.34818	2.33183e-10
HMMR	1.32867	1.22573	1.44027	4.96762e-12
C4BPA	0.908745	0.87589	0.942832	3.52025e-07
TRIP13	1.22207	1.13777	1.31261	3.81304e-08
ASPM	1.2417	1.16206	1.3268	1.54308e-10
PRG4	0.923304	0.872955	0.976557	0.00528503
NCAPH	1.1807	1.09463	1.27355	1.70071e-05
EXO1	1.29009	1.19961	1.3874	6.63952e-12
CAPN3	0.819422	0.760369	0.883061	1.80143e-07
CA3	0.913517	0.86203	0.96808	0.00224324
AQP4	0.921974	0.882618	0.963084	0.000262329
ITIH5	0.899118	0.831801	0.971883	0.00740065
TPPP3	0.915784	0.869432	0.964607	0.000901072
HIGD1B	0.906594	0.84136	0.976885	0.0100596
TBX4	0.886934	0.826042	0.952314	0.000945069
SLC22A3	0.903703	0.859293	0.950408	8.20535e-05
VIPR1	0.828215	0.768052	0.893091	9.66077e-07
FOLR1	0.911648	0.873388	0.951585	2.35148e-05
ZBTB16	0.935606	0.882731	0.991648	0.0249266
PBK	1.24263	1.16777	1.32228	7.25697e-12
GDF10	0.863024	0.811114	0.918255	3.24876e-06
NDNF	0.910491	0.864559	0.958863	0.000384499
MAOA	0.848407	0.791963	0.908873	2.8666e-06
PGC	0.943739	0.917529	0.970697	5.58592e-05
TMEM100	0.902556	0.851894	0.956231	0.00050434
HLF	0.826373	0.781754	0.873538	1.64939e-11
RAD51AP1	1.22185	1.13289	1.31779	2.04573e-07
TMPRSS2	0.841258	0.796694	0.888314	4.82345e-10
PRSS12	0.909561	0.853802	0.96896	0.00331541
PLOD2	1.26242	1.1742	1.35727	2.89141e-10
COL11A1	1.08288	1.04599	1.12107	6.71825e-06
SCTR	0.903814	0.861915	0.947749	2.96825e-05
SCGB1A1	0.949872	0.925858	0.974508	8.26779e-05
VWF	0.918171	0.847436	0.994811	0.0368732
LAMP3	0.89108	0.840295	0.944934	0.000117275
ERCC6L	1.20512	1.11648	1.3008	1.69573e-06
PLLP	0.881067	0.819032	0.9478	0.000675865
FCER1A	0.885694	0.839385	0.934558	9.41651e-06
AOC3	0.857022	0.794258	0.924745	7.00409e-05
NDC80	1.18667	1.11249	1.26579	2.02819e-07
ABI3BP	0.868145	0.810429	0.929972	5.61719e-05
RAP1GAP	0.860766	0.810114	0.914585	1.26348e-06
SFTPB	0.899392	0.871004	0.928705	9.17688e-11
HSD17B6	0.861305	0.817292	0.907688	2.41706e-08
SPOCK1	1.14717	1.08457	1.21338	1.62077e-06
SLC2A1	1.33969	1.25022	1.43556	1.10531e-16
LRRC36	0.859565	0.809489	0.912739	7.75656e-07
PTGDS	0.856578	0.800242	0.916881	8.19592e-06
TMEM158	1.14446	1.07941	1.21343	6.19939e-06
CRTAC1	0.879389	0.828565	0.933331	2.32182e-05
ADAM12	1.14226	1.07266	1.21637	3.37344e-05
SORBS2	0.922304	0.860502	0.988545	0.0222813
CLIC5	0.921339	0.8604	0.986595	0.0189505
CFTR	0.892411	0.842237	0.945575	0.000115518
MYH11	0.905252	0.852444	0.961331	0.00117062
C1orf116	0.908441	0.870318	0.948235	1.13367e-05
PIGR	0.901647	0.868599	0.935953	5.50624e-08
CD1C	0.866313	0.820983	0.914146	1.66301e-07
ELN	0.889878	0.829603	0.954532	0.00111277
TWIST1	1.13463	1.06794	1.20548	4.37212e-05
GINS2	1.21424	1.13183	1.30264	6.1725e-08
CPB2	0.924862	0.883883	0.96774	0.000729769
RNASE1	0.874193	0.820434	0.931475	3.29464e-05
CPA3	0.895374	0.847113	0.946385	9.25763e-05
ALDH1A1	0.922469	0.870446	0.977602	0.00643378
DMBT1	0.949104	0.915127	0.984342	0.00497774
ALPL	0.906573	0.86133	0.954193	0.000173255
ABCA3	0.880491	0.83448	0.929039	3.35385e-06
FOXA2	0.896539	0.855076	0.940013	6.16764e-06
FCN3	0.930497	0.878342	0.985749	0.0143789
LPL	0.893821	0.845515	0.944885	7.49818e-05
SOSTDC1	0.953796	0.910649	0.998988	0.0451944
CHIA	0.898923	0.853712	0.946527	5.18178e-05
FMO5	0.878609	0.832729	0.927016	2.2508e-06
MAOB	0.913843	0.858418	0.972847	0.00476788
CRYM	0.862592	0.82102	0.906268	4.48363e-09
AADAC	0.932691	0.890098	0.977322	0.00347968
KCNJ15	0.863579	0.814562	0.915547	8.68293e-07
GSTA1	0.918265	0.877773	0.960624	0.000210661
CTSE	0.962225	0.92691	0.998887	0.0435551
C6	0.915952	0.859953	0.975597	0.00638088
TNNC1	0.922244	0.881562	0.964802	0.000436988
SCN1A	0.904917	0.855128	0.957605	0.000539595
GPC3	0.851618	0.798391	0.908393	1.07315e-06
RASGRF1	0.880865	0.826046	0.939322	0.000109117
SLC44A4	0.934433	0.880202	0.992005	0.0262092
ROS1	0.883913	0.836546	0.933962	1.12762e-05
SPINK5	0.930274	0.889807	0.972582	0.00144692
TNNT1	1.07736	1.03885	1.1173	6.00897e-05
GREM1	1.12578	1.07489	1.17909	5.18673e-07
GJB1	0.953194	0.911323	0.996989	0.0364784
AQP3	0.896012	0.848385	0.946313	8.14433e-05
OGN	0.918476	0.872291	0.967106	0.00123538
AQP1	0.921255	0.870586	0.974872	0.00448719
HOPX	0.888526	0.843469	0.93599	8.53423e-06
LRRC31	0.904824	0.865937	0.945458	8.10783e-06
IGF2BP3	1.1036	1.05133	1.15848	6.84766e-05
MMP12	1.0658	1.02335	1.11003	0.00212249
APOD	0.944821	0.900076	0.991791	0.0218504
SLC34A2	0.869599	0.828294	0.912963	1.82831e-08
LMO3	0.884501	0.840592	0.930702	2.30756e-06
CEACAM8	0.888631	0.841974	0.937874	1.7798e-05
ALOX15B	0.892114	0.84807	0.938445	9.89981e-06
TMPRSS11E	1.10566	1.06362	1.14937	3.8118e-07
CHIT1	0.943539	0.905538	0.983135	0.00558982
AQP5	0.926522	0.892042	0.962335	8.00942e-05
MMP1	1.05096	1.01467	1.08855	0.00556278
KRT6A	1.11992	1.0891	1.15162	1.81791e-15
SPINK1	0.969799	0.941439	0.999014	0.0428564
FGB	1.03738	1.00944	1.0661	0.00843777
