# Supplementary material for: Identification of fatty acid-related subtypes, the establishment of a prognostic signature, and immune infiltration characteristics in lung adenocarcinoma
Source: Aging (Albany NY). 2023 May 16;15(10):4202–35. doi: 10.18632/aging.204725 (PMC10258028; doi:10.18632/aging.204725)
Supplement: Supplementary Table 11 [file aging-15-204725-s010.xlsx]

## Sheet: Sheet1
Supplementary Table 11. Distribution of gene clusters for all LUAD patients.
ID	geneCluster
GSM1672281	A
GSM1672282	B
GSM1672283	B
GSM1672284	B
GSM1672285	B
GSM1672286	B
GSM1672287	A
GSM1672288	B
GSM1672289	B
GSM1672290	B
GSM1672291	B
GSM1672292	B
GSM1672293	A
GSM1672294	A
GSM1672295	A
GSM1672296	C
GSM1672297	A
GSM1672298	A
GSM1672299	C
GSM1672300	B
GSM1672301	B
GSM1672302	A
GSM1672303	C
GSM1672304	C
GSM1672305	A
GSM1672306	A
GSM1672307	A
GSM1672308	B
GSM1672309	A
GSM1672310	C
GSM1672311	A
GSM1672312	A
GSM1672313	C
GSM1672314	A
GSM1672315	C
GSM1672316	B
GSM1672317	C
GSM1672318	C
GSM1672319	A
GSM1672320	A
GSM1672321	A
GSM1672322	B
GSM1672323	A
GSM1672324	C
GSM1672325	B
GSM1672326	A
GSM1672327	A
GSM1672328	A
GSM1672329	A
GSM1672330	A
GSM1672331	A
GSM1672332	A
GSM1672333	B
GSM1672334	B
GSM1672335	A
GSM1672336	C
GSM1672337	A
GSM1672338	C
GSM1672339	A
GSM1672340	A
GSM1672341	C
GSM1672342	A
GSM1672343	A
GSM1672344	B
GSM1672345	A
GSM1672346	C
GSM1672347	A
GSM1672348	A
GSM1672349	C
GSM1672350	C
GSM1672351	A
GSM1672352	B
GSM1672353	A
GSM1672354	B
GSM1672355	A
GSM1672356	C
GSM1672357	A
GSM1672358	A
GSM1672359	B
GSM1672360	A
GSM1672361	A
GSM1672362	C
GSM1672363	B
GSM1672364	A
GSM1672365	A
GSM1672366	B
GSM1672367	B
GSM1672368	A
GSM1672369	B
GSM1672370	A
GSM1672371	B
GSM1672372	B
GSM1672373	B
GSM1672374	C
GSM1672375	A
GSM1672376	C
GSM1672377	A
GSM1672378	A
GSM1672379	B
GSM1672380	A
GSM1672381	B
GSM1672382	B
GSM1672383	A
GSM1672384	B
GSM1672385	A
GSM1672386	A
GSM1672387	B
GSM1672388	A
GSM1672390	C
GSM1672391	B
GSM1672392	A
GSM1672393	C
GSM1672394	B
GSM1672395	C
GSM1672396	B
GSM1672397	A
GSM1672398	B
GSM1672399	C
GSM1672400	A
GSM1672401	C
GSM1672402	A
GSM1672403	B
GSM1672404	C
GSM1672405	B
GSM1672406	B
GSM1672407	A
GSM1672408	A
GSM1672409	B
GSM1672410	A
GSM1672411	C
GSM1672412	A
GSM1672413	B
GSM1672414	A
GSM1672415	A
GSM1672416	C
GSM1672417	C
GSM1672418	C
GSM1672419	A
GSM1672420	C
GSM1672421	C
GSM1672422	C
GSM1672423	A
GSM1672424	B
GSM1672425	B
GSM1672426	A
GSM1672427	B
GSM1672428	B
GSM1672429	B
GSM1672430	B
GSM1672431	B
GSM1672432	C
GSM1672433	A
GSM1672434	C
GSM1672435	C
GSM1672436	A
GSM1672437	A
GSM1672438	A
GSM1672439	C
GSM1672440	C
GSM1672441	B
GSM1672442	A
GSM1672443	B
GSM1672444	C
GSM1672445	B
GSM1672446	B
GSM1672447	C
GSM1672448	B
GSM1672449	A
GSM1672450	A
GSM1672451	B
GSM1672452	C
GSM1672453	A
GSM1672454	A
GSM1672455	C
GSM1672456	A
GSM1672457	A
GSM1672458	B
GSM1672459	B
GSM1672460	B
GSM1672461	B
GSM1672462	B
GSM1672463	C
GSM1672464	B
GSM1672465	B
GSM1672466	B
GSM1672467	C
GSM1672468	B
GSM1672469	B
GSM1672470	B
GSM1672471	B
GSM1672472	B
GSM1672473	A
GSM1672474	B
GSM1672475	A
GSM1672476	B
GSM1672477	A
GSM1672478	A
GSM1672479	C
GSM1672480	A
GSM1672481	B
GSM1672482	B
GSM1672483	B
GSM1672484	B
GSM1672485	B
GSM1672486	A
GSM1672487	C
GSM1672488	B
GSM1672489	A
GSM1672490	A
GSM1672491	B
GSM1672492	C
GSM1672493	A
GSM1672494	C
GSM1672495	B
GSM1672496	B
GSM1672497	B
GSM1672498	B
GSM1672499	B
GSM1672500	C
GSM1672501	B
GSM1672502	A
GSM1672503	A
GSM1672504	A
GSM1672505	B
GSM1672506	A
GSM1672507	B
GSM1672508	B
GSM1672509	B
GSM1672510	C
GSM1672511	B
GSM1672512	A
GSM1672513	B
GSM1672514	B
GSM1672515	A
GSM1672516	A
GSM1672517	A
GSM1672518	A
GSM1672519	B
GSM1672520	A
GSM1672521	B
GSM1672522	B
GSM1672523	B
GSM1672524	C
GSM1672525	B
GSM1672526	B
GSM1672527	B
GSM1672528	B
GSM1672529	A
GSM1672530	A
GSM1672531	A
GSM1672532	B
GSM1672533	B
GSM1672534	A
GSM1672535	A
GSM1672536	B
GSM1672537	C
GSM1672538	A
GSM1672539	A
GSM1672540	C
GSM1672541	C
GSM1672542	B
GSM1672543	A
GSM1672544	C
GSM1672545	B
GSM1672546	C
GSM1672547	A
GSM1672548	B
GSM1672549	C
GSM1672550	C
GSM1672551	C
GSM1672552	B
GSM1672553	B
GSM1672554	C
GSM1672555	C
GSM1672556	C
GSM1672557	A
GSM1672558	A
GSM1672559	A
GSM1672560	C
GSM1672561	A
GSM1672562	A
GSM1672563	B
GSM1672564	A
GSM1672565	A
GSM1672566	B
GSM1672567	A
GSM1672568	A
GSM1672569	C
GSM1672570	A
GSM1672571	B
GSM1672572	B
GSM1672573	C
GSM1672574	B
GSM1672575	A
GSM1672576	A
GSM1672577	A
GSM1672578	A
GSM1672579	B
GSM1672580	B
GSM1672581	A
GSM1672582	A
GSM1672583	A
GSM1672584	A
GSM1672585	C
GSM1672586	B
GSM1672587	B
GSM1672588	B
GSM1672589	C
GSM1672590	A
GSM1672591	C
GSM1672592	A
GSM1672593	A
GSM1672594	A
GSM1672595	B
GSM1672596	A
GSM1672597	B
GSM1672598	A
GSM1672599	C
GSM1672600	B
GSM1672601	B
GSM1672602	A
GSM1672603	B
GSM1672604	B
GSM1672605	A
GSM1672606	B
GSM1672607	A
GSM1672608	A
GSM1672609	A
GSM1672610	C
GSM1672611	A
GSM1672612	B
GSM1672613	A
GSM1672614	C
GSM1672615	A
GSM1672616	A
GSM1672617	A
GSM1672618	B
GSM1672619	B
GSM1672620	A
GSM1672621	A
GSM1672622	A
GSM1672623	A
GSM1672624	B
GSM1672625	A
GSM1672626	B
GSM1672627	A
GSM1672628	A
GSM1672629	B
GSM1672630	A
GSM1672631	A
GSM1672632	A
GSM1672633	A
GSM1672634	C
GSM1672635	A
GSM1672636	B
GSM1672637	B
GSM1672638	A
GSM1672639	A
GSM1672640	A
GSM1672641	B
GSM1672642	B
GSM1672643	A
GSM1672644	A
GSM1672645	B
GSM1672646	C
GSM1672647	B
GSM1672648	A
GSM1672649	C
GSM1672650	A
GSM1672651	A
GSM1672652	B
GSM1672653	B
GSM1672654	A
GSM1672655	A
GSM1672656	B
GSM1672657	A
GSM1672658	A
GSM1672659	A
GSM1672660	C
GSM1672661	B
GSM1672662	B
GSM1672663	A
GSM1672664	C
GSM1672665	A
GSM1672666	C
GSM1672667	A
GSM1672668	B
GSM1672669	A
GSM1672670	A
GSM1672671	A
GSM1672672	A
GSM1672673	B
GSM1672674	B
GSM1672675	C
GSM1672676	C
GSM1672677	A
GSM1672678	A
GSM1672679	C
GSM1672680	A
GSM1672681	A
GSM1672682	A
GSM1672683	C
GSM1672684	A
GSM1672685	C
GSM1672686	B
GSM1672687	A
GSM1672688	C
GSM1672689	A
GSM1672690	C
GSM1672691	B
GSM1672692	A
GSM1672693	C
GSM1672694	C
GSM1672695	B
GSM1672696	B
GSM1672697	C
GSM1672698	A
GSM1672699	C
GSM1672700	B
GSM1672701	C
GSM1672702	C
GSM1672703	A
GSM1672704	A
GSM1672705	A
GSM1672706	C
GSM1672707	A
GSM1672708	A
GSM1672709	C
GSM1672710	A
GSM1672711	B
GSM1672712	C
GSM1672713	A
GSM1672714	A
GSM1672715	C
GSM1672716	A
GSM1672717	C
GSM1672718	C
GSM1672719	A
GSM1672720	C
GSM1672721	C
GSM1672722	A
GSM1672723	A
GSM1854798	B
GSM1854799	C
GSM1854800	C
GSM1854801	B
GSM1854802	A
GSM1854803	B
GSM1854804	B
GSM1854805	C
GSM1854806	B
GSM1854807	B
GSM1854808	B
GSM1854809	B
GSM1854810	C
GSM1854811	B
GSM1854812	B
GSM1854813	B
GSM1854814	A
GSM1854815	A
GSM1854816	A
GSM1854817	A
GSM1854818	A
GSM1854819	A
GSM1854820	A
GSM1854821	A
GSM1854822	B
GSM1854823	C
GSM1854825	A
GSM1854826	B
GSM1854827	C
GSM1854828	A
GSM1854829	C
GSM1854830	C
GSM1854831	A
GSM1854832	B
GSM1854833	B
GSM1854834	A
GSM1854835	A
GSM1854836	B
GSM1854837	B
GSM1854838	C
GSM1854839	B
GSM1854840	B
GSM1854841	C
GSM1854842	B
GSM1854843	B
GSM1854844	B
GSM1854846	B
GSM1854847	B
GSM1854848	B
GSM1854849	B
GSM1854850	B
GSM1854851	B
GSM1854852	B
GSM1854853	C
GSM1854854	B
GSM1854855	C
GSM1854856	C
GSM1854857	A
GSM1854859	A
GSM1854860	B
GSM1854861	C
GSM1854862	A
GSM1854863	B
GSM1854864	B
GSM1854865	A
GSM1854866	A
GSM1854867	B
GSM1854868	C
GSM1854869	B
GSM1854870	A
GSM1854871	B
GSM1854872	A
GSM1854873	C
GSM1854874	B
GSM1854875	A
GSM1854876	C
GSM1854877	A
GSM1854879	B
GSM1854880	C
GSM1854881	A
GSM1854882	A
GSM1854883	C
GSM1854884	A
GSM1854885	A
GSM1854886	C
GSM1854887	B
GSM1854888	B
GSM1854889	A
GSM1854890	A
GSM1854891	A
GSM1854892	A
GSM1854893	C
GSM1854895	C
GSM1854896	B
GSM1854897	C
GSM1854898	B
GSM1854899	B
GSM1854900	B
GSM1854902	B
GSM1854903	C
GSM1854904	A
GSM1854906	A
GSM1854907	B
GSM1854908	A
GSM1854909	A
GSM1854910	B
GSM1854911	A
GSM1854913	A
GSM1854915	A
GSM1854916	A
GSM1854917	B
GSM1854918	B
GSM1854919	B
GSM1854920	B
GSM1854921	C
GSM1854922	B
GSM1854923	B
GSM1854924	B
GSM1854925	A
GSM1854926	A
GSM1854927	A
GSM1854928	B
GSM1854929	B
GSM1854930	B
GSM1854931	B
GSM1854932	A
GSM1854933	C
GSM1854934	B
GSM1854935	A
GSM1854936	B
GSM1854937	B
GSM1854938	C
GSM1854940	B
GSM1854941	A
GSM1854942	C
GSM1854944	A
GSM1854945	A
GSM1854947	C
GSM1854948	B
GSM1854950	B
GSM1854951	B
GSM1854952	B
GSM1854953	B
GSM1854954	C
GSM1854955	B
GSM1854956	C
GSM1854957	A
GSM1854958	B
GSM1854960	A
GSM1854961	C
GSM1854962	B
GSM1854963	C
GSM1854964	A
GSM1854965	C
GSM1854966	B
GSM1854967	A
GSM1854969	C
GSM1854970	C
GSM1854971	A
GSM1854972	B
GSM1854973	A
GSM1854974	B
GSM1854975	C
GSM1854977	A
GSM1854979	B
GSM1854980	B
GSM1854981	C
GSM1854983	A
GSM1854984	A
GSM1854985	B
GSM1854986	C
GSM1854987	B
GSM1854988	B
GSM1854989	B
GSM1854990	B
GSM1854992	C
GSM1854994	B
GSM1854995	C
GSM1854996	A
GSM1854997	B
GSM1854998	A
GSM1854999	A
GSM1855000	C
GSM1855001	A
GSM1855003	B
GSM1855004	B
GSM1855005	A
GSM1855006	A
GSM1855007	B
GSM1855008	B
GSM1855009	C
GSM1855010	C
GSM1855011	A
GSM1855012	C
GSM1855014	A
GSM1855015	B
GSM1855016	C
GSM1855018	A
GSM1855019	A
GSM1855020	C
GSM1855021	A
GSM1855022	A
GSM1855023	C
GSM1855024	A
GSM1855026	A
GSM1855027	A
GSM1855028	C
GSM1855029	C
GSM1855031	A
GSM1855032	A
GSM1855033	C
GSM1855034	B
GSM1855035	B
GSM1855036	B
GSM1855037	C
GSM1855038	C
GSM1855039	C
GSM1855040	A
GSM1855041	A
GSM1855042	A
GSM1855043	A
GSM1855044	B
GSM1855045	B
GSM1855046	B
GSM1855047	C
GSM1855048	B
GSM1855049	C
GSM1855050	A
GSM1855051	B
GSM1855052	A
GSM1855053	B
GSM1855054	B
GSM1855055	B
GSM1855056	B
GSM1855057	A
GSM1855059	A
GSM1855060	C
GSM1855061	B
GSM1855062	C
GSM1855063	B
GSM1855064	A
GSM1855065	A
GSM1855066	B
GSM1855067	B
GSM1855068	C
GSM1855069	A
GSM1855070	A
GSM1855071	B
GSM1855072	A
GSM1855073	B
GSM1855074	B
GSM1855075	A
GSM1855076	B
GSM1855077	A
GSM1855078	C
GSM1855079	A
GSM1855080	A
GSM1855081	C
GSM1855082	B
GSM1855083	C
GSM1855084	B
GSM1855085	A
GSM1855086	A
GSM1855087	B
GSM1855088	B
GSM1855089	B
GSM1855091	A
GSM1855092	B
GSM1855093	B
GSM1855094	C
GSM1855095	C
GSM1855096	C
GSM1855097	A
GSM1855098	B
GSM1855099	B
GSM1855100	A
GSM1855101	A
GSM1855102	A
GSM1855103	C
GSM1855104	A
GSM1855105	B
GSM1855106	C
GSM1855107	A
GSM1855108	C
GSM1855109	C
GSM1855110	A
GSM1855111	B
GSM1855112	B
GSM1855113	B
GSM1855114	A
GSM1855116	C
GSM1855117	C
GSM1855118	A
GSM1855119	A
GSM1855120	C
GSM1855121	A
GSM1855122	A
GSM1855123	B
GSM1855124	C
GSM1855125	A
GSM1855126	A
GSM1855127	B
GSM1855128	C
GSM1855129	B
GSM1855131	A
GSM1855132	B
GSM1855133	B
GSM1855134	B
GSM1855135	A
GSM1855136	A
GSM1855137	A
GSM1855138	C
GSM1855140	B
GSM1855141	B
GSM1855142	A
GSM1855143	B
GSM1855144	B
GSM1855145	A
GSM1855146	B
GSM1855147	A
GSM1855149	B
GSM1855150	C
GSM1855151	B
GSM1855152	B
GSM1855153	A
GSM1855156	C
GSM1855157	B
GSM1855158	B
GSM1855159	B
GSM1855160	A
GSM1855161	A
GSM1855162	B
GSM1855163	A
GSM1855164	C
GSM1855165	B
GSM1855166	C
GSM1855168	A
GSM1855169	B
GSM1855170	B
GSM1855171	C
GSM1855172	A
GSM1855173	C
GSM1855174	A
GSM1855175	A
GSM1855176	A
GSM1855177	B
GSM1855178	C
GSM1855179	C
GSM1855180	B
GSM1855181	A
GSM1855182	B
GSM1855183	A
GSM1855184	A
GSM1855185	C
GSM1855187	B
GSM1855188	A
GSM1855189	A
GSM1855190	A
GSM1855192	A
GSM1855193	C
GSM1855195	A
GSM1855196	A
GSM1855198	C
GSM1855199	C
GSM1855200	A
GSM1855202	A
GSM1855203	C
GSM1855204	A
GSM1855206	C
GSM1855207	C
GSM1855208	C
GSM1855209	C
GSM1855210	A
GSM1855211	C
GSM1855212	B
GSM1855213	B
GSM1855214	B
GSM1855215	B
GSM1855217	B
GSM1855218	B
GSM1855219	C
GSM1855220	C
GSM1855221	B
GSM1855222	A
GSM1855223	A
GSM1855224	C
GSM1855225	C
GSM1855226	B
GSM1855228	A
GSM1855229	B
GSM1855230	A
GSM1855231	C
GSM1855232	C
GSM1855234	A
GSM1855235	A
GSM1855236	B
GSM1855237	C
GSM1855238	A
GSM773540	A
GSM773541	A
GSM773542	A
GSM773543	A
GSM773544	A
GSM773545	A
GSM773546	C
GSM773547	B
GSM773548	A
GSM773549	B
GSM773550	A
GSM773551	A
GSM773552	C
GSM773553	A
GSM773554	A
GSM773555	C
GSM773556	A
GSM773557	A
GSM773558	C
GSM773559	C
GSM773560	C
GSM773561	A
GSM773562	C
GSM773563	C
GSM773564	B
GSM773565	C
GSM773566	A
GSM773567	B
GSM773568	C
GSM773569	B
GSM773570	A
GSM773571	C
GSM773572	C
GSM773573	C
GSM773574	C
GSM773575	C
GSM773576	A
GSM773577	A
GSM773578	A
GSM773579	A
GSM773580	A
GSM773581	C
GSM773582	C
GSM773583	A
GSM773584	C
GSM773585	A
GSM773586	C
GSM773587	A
GSM773588	A
GSM773589	A
GSM773590	C
GSM773591	A
GSM773592	C
GSM773593	A
GSM773594	B
GSM773595	B
GSM773596	B
GSM773597	A
GSM773598	C
GSM773599	C
GSM773600	C
GSM773601	C
GSM773602	B
GSM773603	C
GSM773604	C
GSM773605	A
GSM773606	B
GSM773607	B
GSM773608	B
GSM773609	B
GSM773610	A
GSM773611	B
GSM773612	C
GSM773613	C
GSM773614	A
GSM773615	A
GSM773616	C
GSM773617	A
GSM773618	B
GSM773619	A
GSM773620	B
GSM773621	C
GSM773622	B
GSM773623	B
GSM773624	B
GSM773625	B
GSM773626	A
GSM773627	A
GSM773628	C
GSM773629	A
GSM773630	C
GSM773631	B
GSM773632	A
GSM773633	C
GSM773634	B
GSM773635	B
GSM773636	A
GSM773637	B
GSM773638	B
GSM773639	A
GSM773640	A
GSM773641	A
GSM773642	C
GSM773643	A
GSM773644	A
GSM773645	C
GSM773646	A
GSM773647	A
GSM773648	C
GSM773649	C
GSM773650	A
GSM773651	C
GSM773652	A
GSM773653	A
GSM773654	A
GSM773655	A
GSM773656	A
GSM773657	B
GSM773658	C
GSM773659	C
GSM773660	A
GSM773661	A
GSM773662	B
GSM773663	B
GSM773664	B
GSM773665	C
GSM773666	A
GSM773667	A
GSM773668	B
GSM773669	A
GSM773670	A
GSM773671	B
GSM773672	A
GSM773673	A
GSM773674	C
GSM773675	A
GSM773676	A
GSM773677	A
GSM773678	A
GSM773679	A
GSM773680	B
GSM773681	B
GSM773682	B
GSM773683	C
GSM773684	B
GSM773685	B
GSM773686	B
GSM773687	B
GSM773688	A
GSM773689	B
GSM773690	B
GSM773691	B
GSM773692	B
GSM773693	B
GSM773694	A
GSM773695	B
GSM773696	B
GSM773697	C
GSM773698	A
GSM773699	B
GSM773700	A
GSM773701	B
GSM773702	A
GSM773703	C
GSM773704	B
GSM773705	B
GSM773706	B
GSM773707	B
GSM773708	A
GSM773709	A
GSM773710	B
GSM773711	B
GSM773712	B
GSM773713	A
GSM773714	B
GSM773715	A
GSM773716	C
GSM773717	A
GSM773718	B
GSM773719	B
GSM773720	A
GSM773721	B
GSM773722	B
GSM773723	C
GSM773724	A
GSM773725	B
GSM773726	A
GSM773727	A
GSM773728	A
GSM773729	B
GSM773730	A
GSM773731	B
GSM773732	B
GSM773733	B
GSM773734	B
GSM773735	B
GSM773736	B
GSM773737	A
GSM773738	B
GSM773739	B
GSM773740	A
GSM773741	A
GSM773742	A
GSM773743	B
GSM773744	B
GSM773745	C
GSM773746	A
GSM773747	B
GSM773748	B
GSM773749	A
GSM773750	B
GSM773751	A
GSM773752	B
GSM773753	B
GSM773754	A
GSM773755	A
GSM773756	A
GSM773757	B
GSM773758	B
GSM773759	B
GSM773760	B
GSM773761	B
GSM773762	B
GSM773763	B
GSM773764	A
GSM773765	B
TCGA-05-4249	B
TCGA-05-4250	A
TCGA-05-4382	C
TCGA-05-4384	B
TCGA-05-4389	A
TCGA-05-4390	C
TCGA-05-4396	A
TCGA-05-4397	C
TCGA-05-4398	C
TCGA-05-4402	A
TCGA-05-4403	B
TCGA-05-4405	B
TCGA-05-4415	C
TCGA-05-4417	A
TCGA-05-4418	C
TCGA-05-4420	C
TCGA-05-4422	A
TCGA-05-4424	A
TCGA-05-4425	A
TCGA-05-4426	A
TCGA-05-4427	A
TCGA-05-4430	B
TCGA-05-4432	A
TCGA-05-4433	B
TCGA-05-4434	A
TCGA-05-5420	A
TCGA-05-5423	B
TCGA-05-5425	A
TCGA-05-5428	A
TCGA-05-5429	A
TCGA-05-5715	A
TCGA-35-3615	B
TCGA-35-4122	A
TCGA-35-4123	C
TCGA-35-5375	C
TCGA-38-4625	A
TCGA-38-4626	B
TCGA-38-4627	A
TCGA-38-4628	A
TCGA-38-4629	C
TCGA-38-4630	C
TCGA-38-4631	C
TCGA-38-4632	A
TCGA-38-6178	A
TCGA-38-7271	B
TCGA-38-A44F	B
TCGA-44-2655	B
TCGA-44-2656	A
TCGA-44-2657	B
TCGA-44-2659	B
TCGA-44-2661	B
TCGA-44-2662	C
TCGA-44-2665	A
TCGA-44-2666	B
TCGA-44-2668	C
TCGA-44-3396	C
TCGA-44-3398	B
TCGA-44-3917	C
TCGA-44-3918	A
TCGA-44-3919	A
TCGA-44-4112	A
TCGA-44-5643	C
TCGA-44-5644	C
TCGA-44-5645	B
TCGA-44-6145	A
TCGA-44-6146	B
TCGA-44-6147	B
TCGA-44-6148	B
TCGA-44-6774	A
TCGA-44-6775	A
TCGA-44-6776	B
TCGA-44-6777	A
TCGA-44-6778	B
TCGA-44-6779	C
TCGA-44-7659	B
TCGA-44-7660	C
TCGA-44-7661	A
TCGA-44-7662	C
TCGA-44-7667	C
TCGA-44-7669	A
TCGA-44-7670	A
TCGA-44-7671	B
TCGA-44-7672	A
TCGA-44-8117	A
TCGA-44-8119	C
TCGA-44-8120	B
TCGA-44-A479	C
TCGA-44-A47A	A
TCGA-44-A47B	A
TCGA-44-A47G	A
TCGA-44-A4SS	C
TCGA-44-A4SU	A
TCGA-49-4486	B
TCGA-49-4487	A
TCGA-49-4488	A
TCGA-49-4490	A
TCGA-49-4494	A
TCGA-49-4501	B
TCGA-49-4505	A
TCGA-49-4506	C
TCGA-49-4507	C
TCGA-49-4510	B
TCGA-49-4512	A
TCGA-49-4514	A
TCGA-49-6742	A
TCGA-49-6743	C
TCGA-49-6744	B
TCGA-49-6745	A
TCGA-49-6761	C
TCGA-49-6767	C
TCGA-49-AAQV	A
TCGA-49-AAR0	B
TCGA-49-AAR2	A
TCGA-49-AAR3	C
TCGA-49-AAR4	C
TCGA-49-AAR9	C
TCGA-49-AARE	C
TCGA-49-AARN	A
TCGA-49-AARO	A
TCGA-49-AARQ	C
TCGA-49-AARR	B
TCGA-4B-A93V	C
TCGA-50-5044	A
TCGA-50-5045	A
TCGA-50-5049	A
TCGA-50-5051	A
TCGA-50-5055	B
TCGA-50-5066	A
TCGA-50-5068	A
TCGA-50-5072	A
TCGA-50-5930	A
TCGA-50-5931	C
TCGA-50-5932	B
TCGA-50-5933	C
TCGA-50-5935	B
TCGA-50-5936	A
TCGA-50-5939	A
TCGA-50-5941	A
TCGA-50-5942	B
TCGA-50-5944	B
TCGA-50-5946	C
TCGA-50-6590	C
TCGA-50-6591	C
TCGA-50-6592	C
TCGA-50-6593	A
TCGA-50-6594	C
TCGA-50-6595	C
TCGA-50-6597	B
TCGA-50-6673	B
TCGA-50-7109	A
TCGA-50-8457	B
TCGA-50-8459	A
TCGA-50-8460	B
TCGA-53-7624	C
TCGA-53-7626	B
TCGA-53-7813	A
TCGA-53-A4EZ	C
TCGA-55-1592	B
TCGA-55-1594	A
TCGA-55-1595	A
TCGA-55-1596	C
TCGA-55-5899	C
TCGA-55-6543	B
TCGA-55-6642	A
TCGA-55-6712	A
TCGA-55-6968	C
TCGA-55-6969	C
TCGA-55-6970	A
TCGA-55-6971	A
TCGA-55-6972	B
TCGA-55-6975	C
TCGA-55-6978	C
TCGA-55-6979	A
TCGA-55-6980	B
TCGA-55-6981	A
TCGA-55-6982	A
TCGA-55-6983	B
TCGA-55-6984	A
TCGA-55-6985	A
TCGA-55-6986	B
TCGA-55-6987	A
TCGA-55-7227	A
TCGA-55-7281	A
TCGA-55-7283	B
TCGA-55-7284	B
TCGA-55-7570	C
TCGA-55-7573	B
TCGA-55-7574	B
TCGA-55-7576	A
TCGA-55-7724	B
TCGA-55-7725	B
TCGA-55-7726	C
TCGA-55-7727	A
TCGA-55-7728	B
TCGA-55-7815	A
TCGA-55-7816	B
TCGA-55-7903	A
TCGA-55-7907	A
TCGA-55-7910	C
TCGA-55-7911	A
TCGA-55-7913	C
TCGA-55-7914	A
TCGA-55-7994	C
TCGA-55-7995	A
TCGA-55-8085	A
TCGA-55-8087	B
TCGA-55-8089	A
TCGA-55-8090	A
TCGA-55-8091	A
TCGA-55-8092	C
TCGA-55-8094	A
TCGA-55-8096	A
TCGA-55-8097	B
TCGA-55-8203	A
TCGA-55-8204	A
TCGA-55-8205	A
TCGA-55-8206	B
TCGA-55-8207	B
TCGA-55-8208	A
TCGA-55-8299	A
TCGA-55-8301	A
TCGA-55-8302	A
TCGA-55-8505	C
TCGA-55-8506	A
TCGA-55-8507	A
TCGA-55-8508	A
TCGA-55-8510	A
TCGA-55-8511	A
TCGA-55-8512	B
TCGA-55-8513	B
TCGA-55-8514	B
TCGA-55-8614	A
TCGA-55-8615	A
TCGA-55-8616	B
TCGA-55-8619	B
TCGA-55-8620	C
TCGA-55-8621	B
TCGA-55-A48X	B
TCGA-55-A48Y	A
TCGA-55-A48Z	C
TCGA-55-A490	C
TCGA-55-A491	A
TCGA-55-A492	B
TCGA-55-A493	C
TCGA-55-A494	C
TCGA-55-A4DF	C
TCGA-55-A4DG	B
TCGA-55-A57B	B
TCGA-62-8394	A
TCGA-62-8395	B
TCGA-62-8397	B
TCGA-62-8398	C
TCGA-62-8399	A
TCGA-62-8402	C
TCGA-62-A46O	C
TCGA-62-A46P	B
TCGA-62-A46R	A
TCGA-62-A46S	B
TCGA-62-A46U	A
TCGA-62-A46V	A
TCGA-62-A46Y	B
TCGA-62-A470	B
TCGA-62-A471	C
TCGA-62-A472	A
TCGA-64-1676	A
TCGA-64-1677	C
TCGA-64-1678	C
TCGA-64-1679	A
TCGA-64-1680	B
TCGA-64-1681	B
TCGA-64-5774	C
TCGA-64-5775	C
TCGA-64-5778	A
TCGA-64-5779	C
TCGA-64-5781	C
TCGA-64-5815	A
TCGA-67-3770	B
TCGA-67-3771	A
TCGA-67-3772	B
TCGA-67-3773	B
TCGA-67-3774	B
TCGA-67-4679	B
TCGA-67-6215	A
TCGA-67-6216	A
TCGA-67-6217	B
TCGA-69-7760	C
TCGA-69-7761	A
TCGA-69-7763	B
TCGA-69-7764	B
TCGA-69-7765	A
TCGA-69-7973	A
TCGA-69-7974	A
TCGA-69-7978	A
TCGA-69-7979	C
TCGA-69-7980	A
TCGA-69-8253	B
TCGA-69-8254	B
TCGA-69-8255	C
TCGA-69-8453	B
TCGA-69-A59K	A
TCGA-71-6725	A
TCGA-71-8520	A
TCGA-73-4658	A
TCGA-73-4659	A
TCGA-73-4662	B
TCGA-73-4666	C
TCGA-73-4668	A
TCGA-73-4670	C
TCGA-73-4675	A
TCGA-73-4676	A
TCGA-73-4677	B
TCGA-73-7498	B
TCGA-73-7499	A
TCGA-73-A9RS	C
TCGA-75-5125	C
TCGA-75-5146	B
TCGA-75-5147	A
TCGA-75-6206	B
TCGA-75-6212	B
TCGA-75-6214	C
TCGA-75-7025	B
TCGA-75-7027	C
TCGA-78-7143	A
TCGA-78-7145	A
TCGA-78-7146	C
TCGA-78-7147	A
TCGA-78-7148	A
TCGA-78-7149	B
TCGA-78-7150	C
TCGA-78-7152	B
TCGA-78-7153	A
TCGA-78-7154	A
TCGA-78-7155	C
TCGA-78-7156	B
TCGA-78-7158	A
TCGA-78-7159	A
TCGA-78-7160	A
TCGA-78-7161	B
TCGA-78-7162	B
TCGA-78-7163	B
TCGA-78-7166	C
TCGA-78-7167	B
TCGA-78-7220	C
TCGA-78-7535	A
TCGA-78-7536	C
TCGA-78-7537	B
TCGA-78-7539	A
TCGA-78-7540	B
TCGA-78-7542	C
TCGA-78-7633	B
TCGA-78-8640	A
TCGA-78-8648	A
TCGA-78-8655	A
TCGA-78-8660	A
TCGA-78-8662	C
TCGA-80-5608	A
TCGA-80-5611	C
TCGA-83-5908	C
TCGA-86-6562	A
TCGA-86-6851	A
TCGA-86-7701	A
TCGA-86-7711	C
TCGA-86-7713	A
TCGA-86-7714	B
TCGA-86-7953	A
TCGA-86-7954	A
TCGA-86-7955	C
TCGA-86-8054	C
TCGA-86-8055	A
TCGA-86-8056	B
TCGA-86-8073	B
TCGA-86-8074	A
TCGA-86-8075	A
TCGA-86-8076	B
TCGA-86-8278	A
TCGA-86-8279	A
TCGA-86-8280	B
TCGA-86-8358	C
TCGA-86-8359	A
TCGA-86-8585	A
TCGA-86-8668	B
TCGA-86-8669	B
TCGA-86-8671	B
TCGA-86-8672	C
TCGA-86-8673	C
TCGA-86-8674	A
TCGA-86-A456	B
TCGA-86-A4D0	C
TCGA-86-A4JF	A
TCGA-86-A4P7	B
TCGA-86-A4P8	B
TCGA-91-6828	B
TCGA-91-6829	A
TCGA-91-6830	B
TCGA-91-6831	C
TCGA-91-6835	A
TCGA-91-6836	C
TCGA-91-6840	A
TCGA-91-6847	C
TCGA-91-6848	C
TCGA-91-6849	B
TCGA-91-7771	B
TCGA-91-8496	B
TCGA-91-8497	B
TCGA-91-8499	C
TCGA-91-A4BC	C
TCGA-91-A4BD	B
TCGA-93-7347	B
TCGA-93-7348	B
TCGA-93-8067	A
TCGA-93-A4JN	A
TCGA-93-A4JO	B
TCGA-93-A4JP	B
TCGA-93-A4JQ	A
TCGA-95-7039	A
TCGA-95-7043	A
TCGA-95-7562	C
TCGA-95-7567	C
TCGA-95-7944	C
TCGA-95-7947	A
TCGA-95-7948	A
TCGA-95-8039	B
TCGA-95-8494	C
TCGA-95-A4VK	A
TCGA-95-A4VN	A
TCGA-95-A4VP	B
TCGA-97-7546	B
TCGA-97-7547	B
TCGA-97-7552	B
TCGA-97-7553	B
TCGA-97-7554	A
TCGA-97-7937	A
TCGA-97-7938	B
TCGA-97-7941	B
TCGA-97-8171	A
TCGA-97-8172	B
TCGA-97-8174	B
TCGA-97-8175	A
TCGA-97-8176	A
TCGA-97-8177	B
TCGA-97-8179	B
TCGA-97-8547	A
TCGA-97-8552	B
TCGA-97-A4LX	A
TCGA-97-A4M0	B
TCGA-97-A4M1	B
TCGA-97-A4M2	B
TCGA-97-A4M3	B
TCGA-97-A4M5	B
TCGA-97-A4M6	B
TCGA-97-A4M7	B
TCGA-99-7458	B
TCGA-99-8025	A
TCGA-99-8028	A
TCGA-99-8032	A
TCGA-99-8033	C
TCGA-99-AA5R	B
TCGA-J2-8192	A
TCGA-J2-8194	B
TCGA-J2-A4AD	A
TCGA-J2-A4AE	B
TCGA-J2-A4AG	B
TCGA-L4-A4E5	C
TCGA-L4-A4E6	B
TCGA-L9-A443	A
TCGA-L9-A444	A
TCGA-L9-A50W	B
TCGA-L9-A5IP	C
TCGA-L9-A743	A
TCGA-L9-A7SV	A
TCGA-L9-A8F4	C
TCGA-MN-A4N1	C
TCGA-MN-A4N4	C
TCGA-MN-A4N5	A
TCGA-MP-A4SV	A
TCGA-MP-A4SW	A
TCGA-MP-A4SY	A
TCGA-MP-A4T4	A
TCGA-MP-A4T6	B
TCGA-MP-A4T7	A
TCGA-MP-A4T8	C
TCGA-MP-A4T9	B
TCGA-MP-A4TA	C
TCGA-MP-A4TC	C
TCGA-MP-A4TD	A
TCGA-MP-A4TE	C
TCGA-MP-A4TF	C
TCGA-MP-A4TH	B
TCGA-MP-A4TI	A
TCGA-MP-A4TJ	A
TCGA-MP-A4TK	A
TCGA-MP-A5C7	B
TCGA-NJ-A4YF	C
TCGA-NJ-A4YG	B
TCGA-NJ-A4YI	B
TCGA-NJ-A4YP	A
TCGA-NJ-A4YQ	A
TCGA-NJ-A55A	B
TCGA-NJ-A55O	B
TCGA-NJ-A55R	A
TCGA-NJ-A7XG	B
TCGA-O1-A52J	B
TCGA-S2-AA1A	B
