# Supplementary material for: Identification of fatty acid-related subtypes, the establishment of a prognostic signature, and immune infiltration characteristics in lung adenocarcinoma
Source: Aging (Albany NY). 2023 May 16;15(10):4202–35. doi: 10.18632/aging.204725 (PMC10258028; doi:10.18632/aging.204725)
Supplement: Supplementary Table 12 [file aging-15-204725-s011.xlsx]

## Sheet: Sheet1
Supplementary Table 12. Construction of signature in the TCGA and GEO cohorts.
id	futime	fustat	UBE2S	HMMR	TMPRSS11E	CHIT1	KRT6A	Riskscore	Risk
GSM773540	1.19726	1	6.82627	6.66487	1.82049	2.40912	7.88877	1.43807	high
GSM773541	2.03562	0	7.80402	7.62226	5.40043	6.67663	11.9499	3.38262	high
GSM773542	7.12603	0	6.68055	6.82932	6.59136	3.41494	13.333	4.09745	high
GSM773543	3.2137	0	7.14646	6.77811	3.98793	6.62053	6.62454	1.22245	high
GSM773544	6.49041	0	6.70984	5.66454	7.2543	4.50303	9.1038	2.00897	high
GSM773545	5.14795	0	7.51779	6.92257	6.7025	9.40099	5.79788	1.27632	high
GSM773546	1.66027	0	7.96553	6.99782	9.38529	6.65571	13.5145	5.47115	high
GSM773547	0.821918	1	5.92772	6.05334	5.15807	5.09337	5.3072	0.942258	high
GSM773548	5.25753	0	6.93626	6.40951	4.29864	5.30149	5.00872	1.02072	high
GSM773549	5.0274	0	6.66366	6.46293	4.84322	9.32964	4.85846	0.790914	low
GSM773550	5.00822	0	7.02894	5.82629	2.99468	2.96701	9.65146	1.74237	high
GSM773551	5.04384	1	7.03051	6.64502	4.18066	5.47878	6.20122	1.21961	high
GSM773552	1.75068	1	8.67433	8.15894	9.01138	3.5023	13.585	8.65187	high
GSM773553	3.59178	1	3.09702	6.28733	1.86424	8.31832	6.90954	0.474351	low
GSM773554	3.00822	0	6.75594	6.17675	2.53652	7.49078	3.91482	0.62283	low
GSM773555	3.25753	0	8.47749	7.26462	7.23268	5.05409	5.0001	1.93637	high
GSM773556	10.5836	0	7.00321	7.41223	2.40314	6.96202	5.36907	0.957909	high
GSM773557	4.0411	0	7.84123	7.47207	5.36351	5.78096	4.78712	1.43025	high
GSM773558	5.08493	0	9.44185	8.17224	6.21083	2.406	8.6779	4.3953	high
GSM773559	8.40274	0	9.99898	8.99588	4.56632	8.1704	6.40307	2.45844	high
GSM773560	3.12877	0	9.43048	8.20313	6.04346	3.42512	13.6236	7.56546	high
GSM773561	5	0	5.77404	5.70186	3.36622	6.38869	7.74787	0.930262	low
GSM773562	4.41096	0	7.90474	8.74852	3.80402	2.78752	8.73582	3.02185	high
GSM773563	5.51781	0	8.13988	8.0828	5.58976	8.14132	4.54143	1.40312	high
GSM773564	5.00274	0	7.25089	5.92509	2.18324	8.57574	7.17073	0.878478	low
GSM773565	6.00274	0	7.90807	8.3454	2.10423	3.45971	8.08841	2.1591	high
GSM773566	9.15616	0	7.34242	6.61708	3.56299	7.83793	10.8981	1.87053	high
GSM773567	3.63836	0	6.92063	6.68764	4.35665	11.1112	5.68788	0.808732	low
GSM773568	8.0137	0	7.28298	7.11834	6.50795	9.21613	10.0259	2.14207	high
GSM773569	7.89041	0	6.66247	7.06494	2.68789	6.7226	4.16431	0.772449	low
GSM773570	4.72329	0	6.63358	6.72232	4.56237	2.45156	8.28008	1.88505	high
GSM773571	7.57534	0	7.17797	6.69788	8.86309	8.88006	7.08916	1.72458	high
GSM773572	4.18904	0	9.11652	7.985	7.27925	8.66145	9.19156	3.22508	high
GSM773573	0.605479	1	8.5728	7.21907	6.21543	5.71089	15.097	6.04634	high
GSM773574	1.49589	1	7.80203	7.24048	7.94559	9.74616	7.8412	1.97527	high
GSM773575	0.947945	1	6.63019	7.21236	1.33814	7.84003	7.81166	1.02592	high
GSM773576	2.33699	1	7.18658	6.81926	5.89973	5.37829	7.04751	1.67264	high
GSM773577	7.29041	1	6.72287	7.22501	6.58061	9.20857	5.95264	1.21052	high
GSM773578	2.23836	0	7.61747	7.76429	7.60912	6.63643	4.42812	1.60151	high
GSM773579	1.16438	1	7.64663	7.67208	5.85742	8.0793	4.60155	1.26661	high
GSM773580	3.50959	0	7.33561	6.75336	1.73855	7.68171	7.49219	1.0694	high
GSM773581	2.86027	0	9.13144	8.49896	8.50908	7.71336	1.46775	1.57628	high
GSM773582	1.54795	0	8.57219	7.98165	8.17326	7.74753	4.82074	1.97078	high
GSM773583	2.90137	1	7.66872	7.78827	2.57037	8.89002	9.77609	1.7523	high
GSM773584	4.45205	1	7.14019	7.85788	2.38893	10.6756	8.12168	1.17005	high
GSM773585	4.64384	1	7.15929	7.54073	9.0145	9.27118	12.0444	3.59935	high
GSM773586	8.15342	0	9.52438	8.23006	8.34008	3.86701	5.81411	3.46326	high
GSM773587	3.13151	1	8.13393	7.79695	4.07066	7.04887	6.65275	1.63355	high
GSM773588	4.60822	0	7.2255	6.77341	1.86701	5.27478	5.67141	0.987866	high
GSM773589	3.40274	1	7.72976	7.07683	8.00237	7.79304	8.60095	2.37949	high
GSM773590	6.16986	0	6.75882	7.34983	7.1508	8.72149	9.95223	2.21963	high
GSM773591	2.58356	1	7.59182	7.75422	7.51483	8.03944	10.4941	3.09009	high
GSM773592	3.68767	1	7.25287	7.44409	7.22302	6.88463	10.6634	2.99426	high
GSM773593	4.06027	1	7.23302	8.60766	5.55295	8.36768	6.04591	1.57355	high
GSM773594	6.53699	0	6.11403	5.25104	5.46512	6.17427	6.01876	0.899441	low
GSM773595	4.27397	0	6.58318	6.67379	5.42589	9.68529	2.99986	0.658993	low
GSM773596	2.74247	1	6.98667	4.77919	2.95092	10.8783	3.15378	0.397024	low
GSM773597	0.709589	1	6.93738	7.06837	10.0059	8.17654	10.5651	3.147	high
GSM773598	6.27123	0	8.5012	6.37048	1.97774	2.60626	2.79181	0.93697	high
GSM773599	5.24932	0	7.79543	7.92226	4.92836	2.23599	5.61637	2.02755	high
GSM773600	5.61096	0	7.59616	7.68324	5.05977	5.86278	7.13676	1.84977	high
GSM773601	4.0411	0	8.10155	7.73906	3.84921	2.79589	10.0474	3.15145	high
GSM773602	4.21644	0	5.85374	5.21631	2.5189	6.01228	7.0336	0.758542	low
GSM773603	1.74247	0	9.24175	7.70778	1.71935	6.81865	7.24793	1.68764	high
GSM773604	3.49315	0	8.5884	7.79089	3.53496	3.47283	6.79767	2.12211	high
GSM773605	5.49315	0	6.93145	6.8877	3.6608	6.51091	6.65449	1.18138	high
GSM773606	5.38356	0	6.45357	4.6191	2.45081	3.68865	4.81349	0.659568	low
GSM773607	6.64384	0	6.31002	5.24632	4.51368	10.9734	0.833501	0.329289	low
GSM773608	4.29041	0	6.28918	4.95881	5.26863	5.5751	5.52729	0.847014	low
GSM773609	2.71233	0	5.52159	5.44031	3.80477	7.35648	4.72709	0.576995	low
GSM773610	1.99726	0	6.03699	6.32429	7.46662	8.8648	6.63254	1.14403	high
GSM773611	6.44932	0	5.70095	5.79251	5.06428	10.958	2.00514	0.397695	low
GSM773612	2.2411	0	5.75586	7.43238	6.24184	7.22335	2.82147	0.801913	low
GSM773613	5.50411	0	8.31476	7.88242	4.08509	7.62777	12.4781	3.40418	high
GSM773614	6.98356	0	6.05984	6.65238	4.49474	6.9327	2.6985	0.638949	low
GSM773615	9.34521	0	6.25932	6.59092	1.2324	6.31221	4.88446	0.666278	low
GSM773616	4.94795	0	10.1682	8.4535	5.58541	4.16257	8.51925	4.25429	high
GSM773617	5.30685	0	7.27783	6.42825	8.70042	8.77543	3.23087	1.02835	high
GSM773618	4.16438	0	6.56794	5.96756	1.84269	7.63139	2.36135	0.44975	low
GSM773619	3.76712	0	4.81627	6.33521	2.44012	7.92199	6.01566	0.597729	low
GSM773620	4.81096	0	6.34307	5.018	4.06138	6.994	5.18432	0.678314	low
GSM773621	4.37534	0	8.6396	8.08538	8.64863	7.04887	6.41536	2.69163	high
GSM773622	4.69589	0	6.55097	4.72295	2.33935	5.77049	4.31512	0.555442	low
GSM773623	4.48493	0	4.94348	5.8269	2.57656	7.3628	4.11997	0.46598	low
GSM773624	4.52877	0	7.30078	5.78692	3.67843	7.73355	4.76983	0.772924	low
GSM773625	3.27671	0	7.02894	5.09073	2.33601	7.95005	6.24617	0.701651	low
GSM773626	4.66301	0	7.32972	7.32886	5.7366	5.32171	3.8778	1.22982	high
GSM773627	5.61644	0	6.41568	6.43068	7.16876	6.18989	4.10042	1.03257	high
GSM773628	3.4411	0	7.23844	8.5326	7.70354	5.7539	8.65075	3.0765	high
GSM773629	2.2411	0	7.58206	5.20752	1.62032	8.19786	4.92805	0.608287	low
GSM773630	3.16164	0	10.2237	9.02072	6.61371	4.30104	1.97214	2.24256	high
GSM773631	8.37808	0	5.82651	5.67747	2.62214	2.33907	4.33705	0.734988	low
GSM773632	5.31781	0	6.69145	7.30197	3.09181	7.44492	3.66853	0.749376	low
GSM773633	4.3726	0	7.5461	8.29243	4.36577	4.07541	1.59534	1.0596	high
GSM773634	6.71233	0	6.44966	5.85994	3.33045	5.23164	1.71519	0.531799	low
GSM773635	5.15342	0	6.54005	5.97326	2.40049	6.82033	1.97958	0.472525	low
GSM773636	4.48493	0	5.72095	6.94125	5.46052	6.38403	7.23375	1.2626	high
GSM773637	5.5726	0	6.71657	6.41847	4.57011	7.04777	2.12333	0.633039	low
GSM773638	5.84658	0	6.11834	4.62434	1.68522	6.97783	5.56614	0.524231	low
GSM773639	2.13425	1	7.21271	7.19128	4.31915	5.10343	4.29306	1.11315	high
GSM773640	1.47945	1	6.77904	6.97488	2.81048	6.86434	6.15087	0.99614	high
GSM773641	3.60822	0	8.21142	6.26017	2.40765	3.98583	3.8294	0.95701	high
GSM773642	5.42466	0	7.0562	7.42249	1.83645	5.17949	3.68068	0.832182	low
GSM773643	1.92329	1	6.69806	7.78049	1.75553	5.9254	9.47288	1.6291	high
GSM773644	1.54521	1	5.02055	6.70242	8.38337	5.43555	3.8413	0.9865	high
GSM773645	2.1589	1	6.49143	6.98487	7.32214	3.30894	5.02738	1.55048	high
GSM773646	4.00822	0	6.44308	7.59502	6.30753	7.13628	6.08707	1.38792	high
GSM773647	3.68493	1	6.63077	7.0889	7.70232	6.8775	5.3597	1.38805	high
GSM773648	2.27945	0	6.91479	6.70603	6.16994	9.41447	3.32143	0.787814	low
GSM773649	7.36164	0	7.62835	7.81754	8.81375	8.36057	7.29892	2.31529	high
GSM773650	3.07397	1	6.21461	7.26963	5.60032	6.18989	4.16136	0.998471	high
GSM773651	7.30959	0	7.9514	7.67904	8.41567	3.05673	10.1091	4.54823	high
GSM773652	5.30411	0	6.92121	6.48942	2.60063	8.19722	4.72577	0.713585	low
GSM773653	2.3863	0	6.8406	6.66457	4.35692	8.00061	4.48824	0.832423	low
GSM773654	7.31781	0	7.47917	7.60595	4.28976	8.65585	1.37802	0.68505	low
GSM773655	4.06027	0	6.39652	4.91927	6.51971	5.00674	9.05978	1.54209	high
GSM773656	3.09041	0	7.09865	6.38364	3.94319	5.40333	5.74392	1.09958	high
GSM773657	2.85479	1	6.19489	7.02853	3.31763	8.51299	3.74553	0.642396	low
GSM773658	3.36712	1	8.21708	8.30672	4.71139	7.33105	10.2214	2.90857	high
GSM773659	6.2	1	8.46997	8.83102	7.33673	7.69343	10.0987	3.98558	high
GSM773660	4.84932	0	6.69633	7.47775	5.07097	6.77449	5.16804	1.15643	high
GSM773661	3.92603	1	7.3758	7.40091	4.51588	7.94746	6.03102	1.2475	high
GSM773662	4.99452	0	6.94678	5.43398	4.45032	9.85208	2.32374	0.479535	low
GSM773663	5.44658	0	6.68886	6.065	2.02178	5.3647	5.30841	0.787093	low
GSM773664	3.92877	0	6.41378	5.87406	4.47125	9.43792	2.37655	0.490021	low
GSM773665	1.72603	1	7.79906	8.1957	4.98476	4.5922	4.39172	1.57445	high
GSM773666	4.21096	0	6.02884	6.18889	5.66771	7.82659	6.09511	0.950965	high
GSM773667	3.91507	1	6.53494	7.10136	2.10867	7.72148	5.3379	0.787283	low
GSM773668	2.84384	1	5.47072	5.77007	6.27843	5.38342	2.94412	0.679883	low
GSM773669	6.81096	0	6.61806	6.62738	5.03391	7.4406	8.95026	1.53861	high
GSM773670	2.0274	0	6.34917	5.56124	4.57629	8.65917	3.47512	0.562324	low
GSM773671	2.85479	0	6.89773	6.62459	3.79007	10.8047	1.51042	0.458681	low
GSM773672	3.47123	0	6.55774	7.63301	6.94012	6.39564	3.32992	1.11494	high
GSM773673	2.7863	0	7.84754	8.53054	9.55926	5.93516	6.56487	3.03036	high
GSM773674	2.85205	0	7.94026	8.86918	7.31014	5.73249	11.3669	4.8916	high
GSM773675	5.09315	0	7.22448	6.99904	6.91434	6.23527	5.17497	1.4197	high
GSM773676	4.70411	0	7.30675	7.27277	8.55803	9.17263	7.13348	1.84576	high
GSM773677	4.09315	0	7.3154	8.25276	5.61175	7.84729	6.03924	1.56538	high
GSM773678	2.06575	0	6.76587	6.51135	3.88975	4.06442	8.3987	1.6087	high
GSM773679	6.47671	0	7.264	7.19369	2.32616	8.35762	9.57387	1.48378	high
GSM773680	4.74795	0	7.16888	6.71368	1.87549	8.40453	4.06359	0.653075	low
GSM773681	5.31781	0	6.40541	4.59447	3.85782	7.06743	5.9922	0.693794	low
GSM773682	2.12055	0	6.93712	5.38559	2.7137	6.03047	4.91192	0.714642	low
GSM773683	7.98082	0	7.90208	7.9657	9.73441	3.47009	10.8872	5.70032	high
GSM773684	4.93973	0	7.33823	6.23164	1.33957	3.24205	4.55728	0.871247	low
GSM773685	5.23836	0	6.62226	6.02443	3.30603	8.37341	3.48421	0.572631	low
GSM773686	4.05753	0	5.56503	6.28944	3.3548	9.11847	4.18037	0.531809	low
GSM773687	3.3726	0	6.99501	5.90991	3.54133	6.81289	1.19803	0.503449	low
GSM773688	5.38082	0	7.04031	6.16877	2.74508	10.0679	1.68067	0.425773	low
GSM773689	9.18356	0	6.28004	5.72638	3.57151	5.82363	3.66853	0.638393	low
GSM773690	5.91233	0	5.21778	6.33934	4.72228	6.2124	5.75974	0.839557	low
GSM773691	9.49589	0	5.63272	5.74375	2.77658	8.11864	5.35182	0.578273	low
GSM773692	8.93973	0	5.72561	5.45648	5.93121	4.63677	5.49312	0.940812	high
GSM773693	4.99452	0	6.58399	6.2376	1.80969	7.74115	3.26816	0.521281	low
GSM773694	5.08493	0	7.13801	7.26213	3.15958	6.09665	4.56617	0.975717	high
GSM773695	6.70959	0	6.8274	5.8099	4.09409	7.85632	4.32958	0.703872	low
GSM773696	5.09315	0	5.75327	5.14344	1.62989	7.22863	4.67337	0.470777	low
GSM773697	5.47397	0	7.87812	7.55836	9.47282	7.18795	7.82631	2.81644	high
GSM773698	5.07397	0	5.25816	7.08111	2.16196	5.86958	3.15442	0.555686	low
GSM773699	5.18904	0	6.2498	4.92856	2.25667	7.06716	4.81787	0.533981	low
GSM773700	5.09863	0	6.63602	7.13561	4.23815	6.24247	5.41805	1.07665	high
GSM773701	4.5726	0	6.16826	6.32828	1.65581	5.33488	3.80678	0.608894	low
GSM773702	8.73699	0	6.92628	7.11552	5.42188	7.25888	5.53322	1.1865	high
GSM773703	4.99178	0	7.15765	7.76037	3.97612	4.72803	4.36521	1.20724	high
GSM773704	4.95616	0	6.50778	5.75419	4.74043	9.8371	3.49655	0.560793	low
GSM773705	6.99178	0	6.57205	6.12576	4.02713	6.98945	4.64457	0.776113	low
GSM773706	8.13151	0	6.26267	4.6473	4.40965	11.1243	4.0249	0.436223	low
GSM773707	8.4	0	6.82045	5.77264	2.61342	8.32923	4.0364	0.573336	low
GSM773708	3.86849	0	6.92246	5.15039	1.95901	7.35198	5.16339	0.610859	low
GSM773709	3.60822	0	6.13909	6.71617	5.03443	6.11183	3.50956	0.798348	low
GSM773710	3.23288	0	5.593	6.26583	4.76608	8.00594	4.55	0.677625	low
GSM773711	4.62466	0	6.93886	5.64152	4.10145	11.2546	1.94283	0.418659	low
GSM773712	3.88219	0	2.64175	6.71772	1.53485	7.61464	2.85318	0.28906	low
GSM773713	3.90685	0	5.44923	7.26498	2.5339	5.37954	4.91385	0.78153	low
GSM773714	4.5863	0	6.55218	7.00707	3.08896	7.99428	2.86506	0.612611	low
GSM773715	5.06301	0	4.55649	6.95158	7.97149	3.2296	4.79589	1.19165	high
GSM773716	5.08493	0	7.54814	7.77918	5.8241	3.45329	8.30484	2.68474	high
GSM773717	4.87671	0	6.66449	7.68324	4.83364	5.93052	5.45909	1.27146	high
GSM773718	5.70959	0	6.04965	6.15388	3.83923	8.24406	8.68055	1.08511	high
GSM773719	5.14795	0	5.61547	5.38341	6.0419	7.73847	4.4271	0.666077	low
GSM773720	3.05205	0	6.14503	6.41319	8.48407	5.54727	4.83802	1.26911	high
GSM773721	7.68767	0	6.43234	5.724	2.64448	5.6651	4.98857	0.716173	low
GSM773722	4.55616	0	6.23337	6.52332	8.73805	7.76294	5.4961	1.2649	high
GSM773723	4.72877	0	6.79256	7.2703	7.52972	10.0466	11.6645	2.59953	high
GSM773724	4.46301	0	6.51621	6.99714	6.44145	8.55348	5.43833	1.09311	high
GSM773725	5.96986	0	7.01593	7.05012	4.65848	5.27578	5.00446	1.17852	high
GSM773726	5.25205	0	6.22816	6.78453	4.61798	7.11359	2.96191	0.691034	low
GSM773727	3.96164	0	6.56594	7.10574	6.33582	5.66969	5.36778	1.31699	high
GSM773728	3.18356	0	6.13823	5.5717	2.2024	7.26654	1.96198	0.398573	low
GSM773729	3.3726	0	5.8495	7.37521	6.5496	7.57218	5.43611	1.12446	high
GSM773730	2.57808	0	6.29469	7.09736	3.94602	7.66124	7.34291	1.1531	high
GSM773731	4.44658	0	6.39182	6.48242	2.70625	2.88983	4.58582	0.909763	low
GSM773732	5.08219	0	3.83662	6.7995	5.66516	5.06023	5.14656	0.79209	low
GSM773733	3.84658	0	5.11706	6.40766	3.92593	2.96409	2.14181	0.606504	low
GSM773734	6.08493	0	4.45104	5.27588	2.92188	4.4754	4.87599	0.539703	low
GSM773735	2.32603	0	5.56355	5.87638	2.17774	4.75265	1.79062	0.437737	low
GSM773736	2.27671	0	6.58596	5.60215	5.74833	4.08167	4.34536	0.966638	high
GSM773737	8.81918	0	6.70043	7.84654	2.12657	5.84793	4.03515	0.866106	low
GSM773738	7.08219	0	5.81892	7.12036	5.72369	5.00137	2.70943	0.834848	low
GSM773739	6.69041	0	5.45042	5.24909	2.28009	8.51119	1.54951	0.302455	low
GSM773740	5.23288	0	6.32766	7.39351	6.735	6.14116	6.89721	1.61786	high
GSM773741	5.02466	0	7.13205	6.30185	6.67824	3.90415	5.85598	1.55141	high
GSM773742	7.99452	0	7.30675	7.66952	7.39442	4.93209	6.38787	2.10028	high
GSM773743	6.26027	0	6.56512	6.44711	4.48902	5.77871	6.05187	1.09189	high
GSM773744	5.88767	0	5.86667	5.55059	5.55171	9.34851	4.06128	0.586894	low
GSM773745	7.01644	0	6.96036	6.77405	7.76948	10.3449	5.02564	1.07955	high
GSM773746	5.33425	0	6.22125	7.26068	2.71741	6.02814	2.00382	0.595191	low
GSM773747	5.04384	0	6.30461	4.89728	4.34948	3.28914	1.94139	0.570763	low
GSM773748	5.4	0	5.0954	5.82361	3.4836	4.88585	2.87262	0.51613	low
GSM773749	6.6	0	7.21239	7.11044	6.01481	9.00898	7.28568	1.45655	high
GSM773750	4.44932	0	6.36507	5.10502	1.7115	7.14607	2.68532	0.405273	low
GSM773751	6.65753	0	6.15573	7.27881	4.5115	3.45755	5.03236	1.18971	high
GSM773752	5.08493	0	6.41844	5.95218	4.41939	5.17333	4.53268	0.844709	low
GSM773753	4.15342	0	6.37241	6.24968	6.41129	7.76415	4.75893	0.91761	low
GSM773754	4.98356	0	6.60436	6.45647	4.75161	5.60843	5.50344	1.06262	high
GSM773755	6.61096	0	6.14972	5.97085	1.79579	6.89731	4.24039	0.557169	low
GSM773756	5.06575	0	6.11516	7.31185	5.04559	6.70997	7.99231	1.47282	high
GSM773757	5.97534	0	5.34855	5.63296	4.24328	6.80948	3.5152	0.535436	low
GSM773758	5.93973	0	5.40224	5.12888	5.73562	8.85999	2.50447	0.442342	low
GSM773759	5.90137	0	4.39163	5.52661	2.63138	7.94391	5.2879	0.459116	low
GSM773760	5.67945	0	6.18635	5.60631	4.32469	7.08702	1.53197	0.467425	low
GSM773761	5.46301	0	5.95877	6.0192	1.61819	7.96372	1.49107	0.35603	low
GSM773762	5.85479	0	6.7644	5.835	5.24606	3.22212	3.43918	0.927202	low
GSM773763	5.47397	0	6.27407	5.75507	3.32673	4.71779	4.70701	0.764868	low
GSM773764	5.2274	0	6.69172	8.49318	5.77914	4.8885	2.26568	1.12627	high
GSM773765	4.54795	0	6.43958	5.39358	5.71663	7.06908	4.95282	0.817266	low
GSM1672281	8.67945	0	5.213	5.99135	4.06415	9.81388	3.40173	0.445713	low
GSM1672282	2.07123	0	6.22764	5.92656	6.03017	8.56128	3.0171	0.63173	low
GSM1672283	5.32603	1	6.15685	5.39469	1.07326	5.0423	4.29589	0.541214	low
GSM1672284	5.68767	0	5.35261	5.34838	3.89816	7.7228	4.64421	0.540902	low
GSM1672285	2.7863	1	6.10797	5.31562	3.18262	7.05434	8.24004	0.925196	low
GSM1672286	6.82192	0	5.81395	5.46568	8.49289	6.57817	0.625507	0.578057	low
GSM1672287	5.68767	0	5.84357	6.20142	4.17261	5.7114	3.64997	0.681624	low
GSM1672288	2.2274	0	5.87312	5.92352	5.79495	8.93281	-0.341064	0.37622	low
GSM1672289	0.476712	1	5.64461	6.41416	4.36898	5.35085	4.47934	0.789183	low
GSM1672290	4.12603	1	6.36332	6.02827	3.95705	3.67119	4.11365	0.847817	low
GSM1672291	6	0	5.98123	6.2893	4.9687	8.72207	3.37512	0.606142	low
GSM1672292	2.86027	1	6.22017	6.43647	4.82999	9.51158	3.30322	0.598884	low
GSM1672293	2.26849	1	7.24928	6.50611	4.47307	7.90998	3.13008	0.740833	low
GSM1672294	4.01096	1	6.86615	6.71928	4.36674	8.33181	2.96198	0.682557	low
GSM1672295	5.47397	0	6.60705	6.31203	3.53474	6.86412	3.51578	0.672458	low
GSM1672296	0.830137	1	7.50263	7.36513	6.39458	4.45113	3.88228	1.42227	high
GSM1672297	0.715068	1	7.13745	6.23572	4.37346	6.50188	7.52064	1.30992	high
GSM1672298	5.03014	1	6.10345	6.13631	5.386	8.94706	5.20603	0.776052	low
GSM1672299	10.8658	0	8.2644	8.16222	3.9133	5.32843	6.41375	1.87818	high
GSM1672300	10.5863	1	5.49073	5.93454	5.90425	4.14147	4.04799	0.839351	low
GSM1672301	3.6	1	4.82944	5.80023	2.95908	5.19594	4.57875	0.572416	low
GSM1672302	0.484932	1	7.24571	7.58823	2.16158	4.8299	7.67439	1.52328	high
GSM1672303	0.19726	1	6.62348	8.88951	9.01872	3.50734	11.9711	5.8071	high
GSM1672304	1.44658	1	7.2088	8.46192	9.42382	7.60245	12.9642	5.39727	high
GSM1672305	1.33973	1	6.45829	6.90297	5.95881	5.25257	6.5696	1.44876	high
GSM1672306	2.43288	1	6.02444	6.12066	3.56145	5.37884	9.9316	1.46768	high
GSM1672307	6.67397	1	7.3752	7.1162	4.31825	7.12271	5.55723	1.16409	high
GSM1672308	4.84932	1	6.00058	5.64273	8.65479	8.29704	5.56412	1.03258	high
GSM1672309	7.61096	1	6.88144	6.83274	5.25021	6.87363	11.3232	2.34862	high
GSM1672310	0.328767	1	8.3626	6.91779	1.22612	4.27102	3.71315	0.943895	high
GSM1672311	1.38082	1	7.79817	7.36142	7.88841	7.86119	12.3802	3.97224	high
GSM1672312	5.09589	0	6.39114	6.50474	3.88998	6.5282	4.0291	0.75364	low
GSM1672313	5.12055	1	8.09235	6.6353	4.37423	4.08118	3.8257	1.17917	high
GSM1672314	5.90137	0	7.14089	6.94372	6.39302	6.80383	4.09301	1.1184	high
GSM1672315	6.90411	0	7.6061	6.88486	2.11723	3.53955	4.64354	1.06679	high
GSM1672316	1.52877	1	5.92611	5.66696	2.88617	8.19048	3.9507	0.503972	low
GSM1672317	3.76438	1	8.43787	8.22519	7.54962	7.84762	3.98173	1.69685	high
GSM1672318	1.69315	1	7.58286	7.15726	5.36107	7.45806	11.6572	2.78637	high
GSM1672319	9.08219	0	7.01031	6.6624	4.44116	6.9353	3.69453	0.832535	low
GSM1672320	10.9808	0	6.30218	5.79104	5.71797	8.96133	4.34389	0.700622	low
GSM1672321	5.79452	1	6.02551	5.47156	5.35422	9.83308	5.39488	0.668853	low
GSM1672322	4.28219	0	5.49244	5.74326	5.03	9.82035	3.69926	0.506064	low
GSM1672323	1.44658	1	6.20911	6.479	4.94755	5.17338	12.0507	2.3828	high
GSM1672324	1.38904	1	7.51621	8.09772	8.67053	8.43957	9.21606	2.96781	high
GSM1672325	7.13425	0	5.65018	5.64375	4.78947	7.62218	6.08158	0.772172	low
GSM1672326	8.49863	0	6.0907	5.48465	2.84963	7.37773	4.23563	0.545953	low
GSM1672327	9.66575	0	7.52469	7.22321	1.38882	5.15056	0.97146	0.59411	low
GSM1672328	9.51781	1	5.98123	6.26609	3.058	4.5973	3.54877	0.673704	low
GSM1672329	1.56164	1	5.55515	6.40615	7.04799	9.15708	7.71107	1.16617	high
GSM1672330	6.91233	1	6.37892	6.29749	6.15705	8.62471	4.04714	0.784122	low
GSM1672331	12.6	0	7.1611	6.65407	7.60372	4.89777	6.6118	1.84541	high
GSM1672332	12.6493	0	7.14671	8.26948	0.706557	4.20149	6.33398	1.2873	high
GSM1672333	13.3644	0	5.197	4.69806	4.29929	7.52117	4.37162	0.48493	low
GSM1672334	5.24384	0	5.53793	5.79409	3.64601	7.99466	11.5935	1.36596	high
GSM1672335	10.8904	1	6.84903	6.65496	3.11727	8.31912	3.41542	0.63869	low
GSM1672336	10.7507	0	7.72941	7.6858	6.50544	5.17596	4.56302	1.62503	high
GSM1672337	13.1178	0	5.96289	5.53244	4.46526	9.44329	3.22217	0.482391	low
GSM1672338	12.9616	0	7.78293	8.60061	4.46593	4.9885	12.8802	4.5022	high
GSM1672339	6.27123	0	5.99643	6.90649	4.11372	8.71471	3.67279	0.642765	low
GSM1672340	8.70411	0	7.09397	7.3393	2.02167	4.57525	8.25518	1.54615	high
GSM1672341	2.31781	1	7.34545	7.15681	10.0404	4.43042	8.02694	3.13148	high
GSM1672342	0.591781	1	7.32483	7.25296	7.4229	9.29662	6.76959	1.58096	high
GSM1672343	6.53425	1	6.08417	5.94653	3.8302	6.05665	2.06712	0.529235	low
GSM1672344	6.76438	0	5.58975	6.1629	4.01182	4.3929	3.62914	0.696285	low
GSM1672345	8.31781	0	6.64623	5.85115	4.80984	7.26489	10.5542	1.66091	high
GSM1672346	13.8164	0	9.06148	8.04569	3.97825	3.01266	4.67446	1.94592	high
GSM1672347	1.22466	1	5.32646	7.89973	5.47107	6.18683	2.64674	0.787055	low
GSM1672348	0.789041	1	7.39003	6.99191	7.27533	8.38814	4.35449	1.18442	high
GSM1672349	7.80822	0	7.60376	6.70457	5.3495	6.37407	2.86236	0.927567	low
GSM1672350	5.12877	0	8.02015	6.53563	6.67145	6.78499	6.85046	1.7381	high
GSM1672351	5.28493	0	6.79278	6.38988	4.49627	7.15313	4.25595	0.821591	low
GSM1672352	1.71781	1	6.4416	6.59969	4.16074	7.97775	5.17149	0.831758	low
GSM1672353	1.83288	1	6.76377	6.67546	4.01445	4.16896	5.67859	1.179	high
GSM1672354	5.58082	1	5.32432	5.28898	4.36165	9.29438	1.12928	0.324791	low
GSM1672355	2.98356	0	7.17723	6.67957	3.64204	6.06464	8.20689	1.48024	high
GSM1672356	1.86575	1	7.25723	8.22074	3.36252	4.15806	4.10902	1.24988	high
GSM1672357	2.70411	0	6.56801	7.21914	4.78387	5.31514	1.6903	0.753366	low
GSM1672358	3.13151	0	5.93809	5.90608	4.25674	7.06522	4.63337	0.691707	low
GSM1672359	4.45479	1	5.54004	5.94703	7.37803	8.05229	2.48038	0.621893	low
GSM1672360	7.89863	1	5.6872	5.31833	4.16234	5.56201	1.02572	0.422068	low
GSM1672361	4.3726	0	5.58871	6.46484	2.37675	6.82511	3.156	0.51024	low
GSM1672362	1.0274	1	7.19825	8.54025	4.89953	4.07685	2.75908	1.26696	high
GSM1672363	2.42466	0	5.75616	5.40784	4.12678	9.36914	7.26319	0.741256	low
GSM1672364	8.83562	0	6.16602	7.70258	7.48903	6.65073	4.94747	1.34413	high
GSM1672365	4.4137	0	5.99609	5.95253	4.70857	5.69321	4.40561	0.774863	low
GSM1672366	1.79178	0	5.54319	7.50243	5.03587	7.60896	1.67265	0.596015	low
GSM1672367	4.5863	0	6.228	6.50518	0.386867	11.3437	13.6612	1.32824	high
GSM1672368	1.72603	1	5.77669	6.34016	8.29151	4.94192	3.18962	0.986054	high
GSM1672369	0.6	1	5.1122	5.33364	7.58098	6.78965	4.79554	0.78096	low
GSM1672370	13.1425	0	6.5623	7.02062	2.25201	3.76553	6.97168	1.2425	high
GSM1672371	4.99726	0	5.3382	5.68623	3.86804	9.85886	3.56986	0.433702	low
GSM1672372	1.74247	1	5.23756	5.65208	3.68818	10.6958	6.01839	0.539059	low
GSM1672373	4.40548	0	5.213	5.02693	4.4631	8.65796	3.00351	0.407231	low
GSM1672374	1.90685	0	7.2708	6.51464	2.15067	7.85996	3.99691	0.676357	low
GSM1672375	3.88521	0	6.96931	7.01746	5.7268	4.28304	4.14978	1.22468	high
GSM1672376	4.85836	1	6.83197	7.13026	3.39311	7.00684	11.4184	2.07516	high
GSM1672377	4.23945	0	6.78334	7.42595	4.73016	4.16022	4.53106	1.2262	high
GSM1672378	2.97945	1	6.43704	6.40052	3.19596	7.36203	8.96571	1.23558	high
GSM1672379	0.542466	1	5.98087	6.32998	0.320785	7.38236	3.83986	0.464335	low
GSM1672380	4.51479	1	7.40893	7.56366	2.83164	4.0358	9.89136	2.28987	high
GSM1672381	0.800548	1	6.1255	5.56627	3.58715	6.80214	4.68649	0.651017	low
GSM1672382	4.83945	0	5.1974	5.9814	5.1494	7.95037	3.88397	0.583756	low
GSM1672383	4.25836	0	7.02632	7.54858	4.02563	7.89695	13.7314	3.04599	high
GSM1672384	1.76548	1	5.57337	5.88547	5.29097	11.9137	3.24523	0.444217	low
GSM1672385	0.524384	1	6.87273	7.29488	5.58573	6.87192	4.53181	1.10967	high
GSM1672386	5.67205	1	6.06603	5.7778	7.14706	8.59091	5.65491	0.924219	low
GSM1672387	5.27178	0	6.07897	6.26609	7.87441	9.93881	3.95329	0.791348	low
GSM1672388	2.64986	1	7.86443	8.12681	6.27066	8.62574	7.07257	1.91742	high
GSM1672390	4.63151	0	6.61491	7.8183	7.99363	5.64252	2.79004	1.24544	high
GSM1672391	5.67534	0	5.11626	5.97536	5.24077	7.7733	8.09494	0.994569	high
GSM1672392	4.62904	0	6.5048	6.49481	3.67695	4.29909	6.12314	1.12205	high
GSM1672393	5.03425	0	8.41706	7.97352	3.5841	8.48327	3.54877	1.04001	high
GSM1672394	4.14493	0	6.0154	6.87342	4.0841	12.047	2.74578	0.462447	low
GSM1672395	6.02959	0	8.43095	6.72162	7.50868	5.94756	7.5371	2.35459	high
GSM1672396	5.48548	0	6.31462	5.78182	5.32253	7.29863	5.62571	0.881384	low
GSM1672397	5.98356	0	5.8644	5.99522	5.8184	7.07103	7.37253	1.12256	high
GSM1672398	1.63562	1	5.81015	6.18987	4.93953	4.292	3.38463	0.766364	low
GSM1672399	2.57096	1	7.25229	6.59178	10.0732	7.03071	6.851	2.08279	high
GSM1672400	3.72575	1	5.76654	6.49	5.86221	10.0897	4.06355	0.655814	low
GSM1672401	6.9	0	7.30932	7.72684	4.13892	8.89178	4.62652	0.992888	high
GSM1672402	1.03808	1	7.71939	7.42866	8.58926	7.94101	9.36197	2.87988	high
GSM1672403	6.40192	0	6.25873	5.78803	5.80483	9.18144	3.68415	0.636763	low
GSM1672404	0.918904	0	6.89825	7.24473	4.24034	4.54378	8.34166	1.82648	high
GSM1672405	2.50932	0	5.43119	5.34457	0.430475	9.02257	4.3132	0.355122	low
GSM1672406	6.04849	0	5.11112	6.65214	4.00666	9.68036	3.122	0.470682	low
GSM1672407	0.96	1	6.84175	6.79574	3.78921	7.13075	2.79929	0.690331	low
GSM1672408	6.13233	0	7.8634	7.39131	3.75283	3.25875	14.9878	5.14946	high
GSM1672409	2.62521	1	6.0975	4.96845	1.39774	9.22595	4.82539	0.425305	low
GSM1672410	0.18411	1	6.29709	6.925	4.91829	9.99003	11.9611	1.88722	high
GSM1672411	0.727397	1	7.97366	7.73294	3.07816	3.79234	3.38672	1.17737	high
GSM1672412	7.57808	0	7.13066	5.97482	9.23399	8.2186	7.75074	1.79288	high
GSM1672413	7.40301	0	5.81255	4.56398	4.76737	4.81663	10.6956	1.41984	high
GSM1672414	2.05233	1	7.71578	7.81447	5.2473	5.82013	12.3867	3.77895	high
GSM1672415	3.45534	1	7.23898	6.30954	3.12837	6.9769	3.57577	0.713464	low
GSM1672416	1.00274	1	7.28827	7.15188	9.91062	5.46334	8.1243	2.90988	high
GSM1672417	0.221918	1	6.94323	7.53514	9.08692	7.89567	10.2476	3.04958	high
GSM1672418	7.89041	1	7.36871	6.04907	6.68346	6.47513	9.88623	2.18111	high
GSM1672419	5.43288	1	7.23653	6.53323	4.6865	7.31396	4.68447	0.954118	high
GSM1672420	5.63836	1	7.95612	6.84111	4.13406	10.1816	2.06854	0.639622	low
GSM1672421	3.94521	1	7.19352	7.82798	5.71577	5.91252	6.14923	1.66269	high
GSM1672422	1.31507	1	8.17871	7.47891	8.71452	6.15163	10.2082	3.91082	high
GSM1672423	5.91781	0	6.21877	6.21838	2.09281	3.94343	4.20618	0.719341	low
GSM1672424	3.86301	0	5.65512	5.49052	3.00589	8.8051	4.0923	0.466114	low
GSM1672425	4.27397	1	5.84987	5.23718	1.06266	8.97827	4.20383	0.389404	low
GSM1672426	3.20548	1	8.17613	7.20236	3.43647	3.98936	8.78811	2.24242	high
GSM1672427	5.42466	0	5.83767	5.83085	3.00327	6.02545	4.08442	0.600025	low
GSM1672428	3.61644	0	5.48401	4.9185	5.30784	9.59157	3.94313	0.477285	low
GSM1672429	5.75342	0	5.8464	3.46384	3.25699	7.2953	1.05823	0.270101	low
GSM1672430	6.16438	0	6.574	7.11898	3.6205	8.88373	3.65094	0.68426	low
GSM1672431	7.56164	0	5.96601	4.87201	4.49627	4.22968	4.16375	0.681477	low
GSM1672432	5.34247	0	8.66412	7.45613	1.10404	4.51557	4.06752	1.09279	high
GSM1672433	3.53425	0	7.7905	7.17732	5.11927	4.33303	12.1608	3.65481	high
GSM1672434	5.67123	0	8.73836	7.44708	3.02718	4.43984	5.90167	1.65581	high
GSM1672435	3.28767	1	7.73968	8.24299	8.21172	6.8732	4.51153	1.84489	high
GSM1672436	1.72603	1	7.15706	7.63251	5.04079	4.07148	3.77185	1.25909	high
GSM1672437	2.38356	1	7.62233	7.42282	4.29929	6.3025	9.03928	2.05773	high
GSM1672438	2.13699	1	7.15706	6.80078	4.91014	5.55283	6.61289	1.4241	high
GSM1672439	6.32877	0	6.48963	6.71701	2.41198	3.93306	9.77944	1.67278	high
GSM1672440	0.164384	1	7.99808	7.60209	7.81126	4.02698	13.0354	5.82065	high
GSM1672441	5.42466	0	6.83102	6.48045	5.65432	8.06705	1.92049	0.6552	low
GSM1672442	1.15068	1	5.9056	5.53351	4.04779	4.24522	10.0873	1.5056	high
GSM1672443	2.71233	0	5.90626	4.5033	1.79246	6.50481	7.5851	0.667153	low
GSM1672444	6.9863	0	7.8634	6.82043	5.63598	5.44112	7.41305	1.88702	high
GSM1672445	5.42466	0	6.40808	4.90785	5.24673	6.52234	5.07134	0.760204	low
GSM1672446	1.23288	0	5.84324	4.72453	4.44618	12.3507	7.09508	0.565296	low
GSM1672447	7.47945	0	7.26706	6.73032	5.02085	3.89047	4.10743	1.17318	high
GSM1672448	5.58904	1	5.46942	4.97384	2.81295	9.55394	4.52897	0.414676	low
GSM1672449	2.71233	0	6.82768	6.66521	6.48553	7.79934	10.0385	2.03711	high
GSM1672450	1.9726	1	7.20172	7.19822	5.42654	8.05902	4.82936	1.09158	high
GSM1672451	5.09589	0	5.81779	4.69743	1.06695	9.54265	4.0052	0.335955	low
GSM1672452	9.36986	1	7.11984	6.4996	5.32646	4.28693	4.52757	1.17003	high
GSM1672453	0.328767	1	6.5138	6.754	6.66889	11.1108	6.11025	0.995662	high
GSM1672454	1.64384	1	7.97153	7.37058	3.53897	6.98005	4.46014	1.0868	high
GSM1672455	4.27397	1	7.59402	6.34253	3.83493	5.67271	4.77468	1.01574	high
GSM1672456	7.64384	0	6.73494	6.75078	3.81979	6.20207	10.8265	1.9569	high
GSM1672457	1.15068	1	7.38059	7.08701	9.65081	6.02545	11.0404	3.96907	high
GSM1672458	8.21918	0	5.94155	5.0841	0.808101	8.37321	3.10869	0.341395	low
GSM1672459	2.71233	0	6.35807	5.63232	4.79138	8.03427	4.45521	0.682138	low
GSM1672460	2.63014	1	4.7711	5.59108	7.91299	7.3115	4.39986	0.732254	low
GSM1672461	4.93151	0	6.30552	5.74326	4.89392	9.25852	3.50623	0.571482	low
GSM1672462	4.10959	0	6.63913	5.33418	2.09896	3.81227	4.90774	0.736765	low
GSM1672463	1.23288	1	8.54693	6.82773	8.83587	6.703	4.54562	1.7988	high
GSM1672464	3.0411	0	5.07637	5.19982	5.29326	6.66679	3.13386	0.507886	low
GSM1672465	4.43836	0	6.17983	4.55257	1.82526	7.43975	5.83893	0.532668	low
GSM1672466	2.54795	0	4.65895	5.57522	4.41349	4.0281	4.03735	0.616822	low
GSM1672467	3.12329	0	7.78952	7.08969	4.5734	7.03755	4.3475	1.09106	high
GSM1672468	9.45205	0	5.70908	6.49294	6.87961	6.57374	4.76272	0.968536	high
GSM1672469	2.9589	0	5.59636	5.73571	4.16234	9.07934	-0.295352	0.301997	low
GSM1672470	3.94521	1	6.06285	5.62824	4.38231	8.30228	3.44678	0.544922	low
GSM1672471	1.56164	1	5.55869	5.66077	3.16689	6.40257	6.97267	0.79713	low
GSM1672472	7.47945	0	6.27975	5.54301	1.48821	5.76938	3.04628	0.478379	low
GSM1672473	16.7671	1	7.84935	7.71732	7.55407	3.52459	6.31545	2.52069	high
GSM1672474	4.10959	0	4.86462	4.68099	9.21978	9.33424	2.86755	0.527746	low
GSM1672475	6.57534	0	7.13124	7.04902	6.37963	9.20193	6.28392	1.28343	high
GSM1672476	3.45205	1	6.27646	6.19523	3.02478	7.31838	2.82477	0.535248	low
GSM1672477	4.93151	0	8.70376	7.46768	0.833521	3.61003	5.88191	1.42756	high
GSM1672478	2.13699	0	7.19057	6.10248	2.10501	6.68269	4.02241	0.674486	low
GSM1672479	5.09589	1	7.32419	7.23889	3.11727	5.89455	7.25212	1.41172	high
GSM1672480	1.80822	0	6.2993	5.46408	1.67698	5.51032	4.07305	0.557074	low
GSM1672481	5.17808	0	5.7256	5.14638	1.152	7.75821	3.26344	0.364501	low
GSM1672482	5.58904	0	5.80903	6.30514	4.19066	9.79503	4.64149	0.605141	low
GSM1672483	0.575342	0	5.72491	5.37473	6.56416	8.05143	8.77571	1.19703	high
GSM1672484	4.27397	1	6.20592	6.02214	4.96801	8.88661	4.11213	0.653125	low
GSM1672485	2.9589	0	6.12763	5.51277	0.815017	7.36662	3.83554	0.437717	low
GSM1672486	1.23288	1	7.36805	7.37431	6.86768	3.77601	5.16468	1.78284	high
GSM1672487	1.64384	1	7.33321	7.46402	9.77818	6.08919	5.04365	1.9869	high
GSM1672488	3.36986	0	6.52647	5.70582	4.04353	4.67271	5.07011	0.882191	low
GSM1672489	2.05479	1	7.66588	4.75813	3.89534	4.06462	3.86418	0.798345	low
GSM1672490	3.45205	0	7.17442	5.69196	3.42309	7.57759	4.36299	0.701052	low
GSM1672491	4.19178	1	6.17244	6.28599	5.23126	4.05372	3.81768	0.903454	low
GSM1672492	4.10959	0	9.57999	7.61431	5.39549	8.27879	9.6944	3.0122	high
GSM1672493	4.68493	1	6.83243	6.53372	1.60391	6.09312	10.3485	1.49485	high
GSM1672494	1.06849	1	8.03086	7.32889	2.53934	4.28198	9.58794	2.24076	high
GSM1672495	6.41096	1	5.94975	5.66027	3.56848	5.26173	4.36077	0.678852	low
GSM1672496	3.94521	0	5.99953	6.44646	4.32195	8.19946	4.59893	0.707783	low
GSM1672497	2.71233	1	6.38818	6.02408	2.70992	9.39649	2.24085	0.420798	low
GSM1672498	3.0411	0	5.81779	4.66936	1.44517	7.17015	4.05707	0.403943	low
GSM1672499	1.39726	1	5.63544	6.81598	3.44086	7.43429	12.6702	1.88743	high
GSM1672500	1.9726	1	6.76777	7.35456	3.87456	7.55999	7.53763	1.32014	high
GSM1672501	3.61644	0	5.39625	5.33419	0.935794	6.87407	3.4385	0.378276	low
GSM1672502	2.46575	0	6.79369	7.92193	4.73343	4.53645	9.13323	2.30311	high
GSM1672503	4.10959	0	6.42116	7.30476	7.12351	6.32538	5.78813	1.4419	high
GSM1672504	7.23288	0	6.67985	7.00962	5.29499	5.93513	2.68229	0.845654	low
GSM1672505	3.45205	0	5.67419	5.49211	4.28216	9.59695	4.74026	0.540742	low
GSM1672506	3.78082	0	5.95238	6.14175	3.80878	4.23799	3.65094	0.728902	low
GSM1672507	4.60274	0	6.12441	5.41113	4.75451	9.18962	3.69637	0.536712	low
GSM1672508	3.28767	0	5.77597	6.11425	5.02748	9.37748	4.60436	0.643698	low
GSM1672509	3.12329	0	5.36222	5.47515	5.21605	6.76319	1.91242	0.468737	low
GSM1672510	3.53425	0	7.62563	8.91617	3.51619	6.50882	12.775	3.80531	high
GSM1672511	4.52055	0	5.42198	5.96834	5.17299	6.12652	4.7199	0.751534	low
GSM1672512	1.39726	1	6.80643	6.77334	5.84272	5.54126	6.69661	1.47814	high
GSM1672513	2.9589	0	5.49105	5.34777	4.59337	6.62457	6.26471	0.770829	low
GSM1672514	0.821918	1	6.6786	6.25869	5.39955	8.79758	3.81945	0.732859	low
GSM1672515	1.89041	1	7.87145	6.39765	2.67234	4.21518	6.91237	1.37828	high
GSM1672516	5.09589	0	6.89145	5.73571	-0.0760589	4.66171	5.077	0.649457	low
GSM1672517	6.9863	0	7.61833	6.95351	5.34268	8.91821	3.24177	0.863328	low
GSM1672518	3.86301	1	6.41786	7.88385	6.99167	6.68226	12.9736	3.74097	high
GSM1672519	3.94521	1	5.26684	6.00416	3.13839	6.45241	5.12829	0.634866	low
GSM1672520	4.68493	0	5.62914	6.39861	3.97037	6.37774	2.23186	0.536642	low
GSM1672521	3.53425	0	4.96527	5.31344	1.63474	9.41759	5.63272	0.422059	low
GSM1672522	3.36986	0	5.0176	5.18913	0.0940166	7.24075	4.75744	0.373578	low
GSM1672523	3.53425	0	4.32989	5.40213	3.57167	7.42774	4.11061	0.432562	low
GSM1672524	2.63014	0	5.72526	6.30514	4.10238	5.73132	5.81254	0.885009	low
GSM1672525	5.26027	0	4.3824	5.11149	3.4573	6.86931	3.91482	0.417035	low
GSM1672526	8.79452	0	6.27466	5.83948	4.48521	9.55646	3.02692	0.514565	low
GSM1672527	2.05479	1	5.86926	5.7649	4.72621	7.10346	4.02161	0.645494	low
GSM1672528	7.89041	0	6.0373	5.86534	4.90482	9.41456	5.71658	0.730882	low
GSM1672529	8.05479	0	7.93236	5.60574	4.78316	5.22694	6.48413	1.32267	high
GSM1672530	3.0411	1	8.63682	6.6045	2.19935	6.49579	3.59423	0.87656	low
GSM1672531	7.39726	0	6.49971	5.19362	5.3849	8.17708	4.32077	0.669359	low
GSM1672532	3.28767	0	6.36997	5.27238	4.82802	6.47105	3.09602	0.603451	low
GSM1672533	5.83562	1	5.68008	5.50283	3.70602	11.0699	4.0988	0.433425	low
GSM1672534	0.739726	1	7.91695	6.39427	6.26446	9.09742	7.56282	1.52752	high
GSM1672535	9.0411	0	6.88897	6.29602	4.2127	7.73765	5.31589	0.881884	low
GSM1672536	9.0411	0	6.83436	6.18738	5.31841	11.2605	5.60136	0.789282	low
GSM1672537	0.493151	1	7.64799	7.03053	3.26047	5.81368	6.96069	1.40918	high
GSM1672538	7.80822	1	7.35992	6.02061	5.01409	6.83766	3.79544	0.852651	low
GSM1672539	3.12329	1	6.68452	7.25661	1.69703	6.66594	5.69643	0.888196	low
GSM1672540	0.739726	1	7.83841	6.40989	4.35563	3.51216	8.6114	2.06351	high
GSM1672541	7.15068	0	6.61445	5.9245	4.37943	7.74009	2.19877	0.549086	low
GSM1672542	7.23288	0	5.89846	5.04154	3.90807	10.8934	5.48875	0.511142	low
GSM1672543	6.08219	0	7.03409	6.44598	8.31246	7.98428	6.05944	1.43707	high
GSM1672544	0.657534	1	7.31646	6.35354	5.65603	5.47461	11.8878	2.82948	high
GSM1672545	4.84932	0	5.89708	5.3435	1.49186	8.41576	10.4657	0.939084	high
GSM1672546	4.52055	0	8.57791	6.97755	9.55372	8.46949	4.32231	1.71681	high
GSM1672547	2.9589	0	8.01432	6.23432	1.15582	7.56485	3.93567	0.67039	low
GSM1672548	1.23288	1	5.43744	6.15067	5.66714	9.71746	6.48526	0.806603	low
GSM1672549	6.9863	0	7.47991	7.53607	10.9074	6.37729	9.60186	3.94615	high
GSM1672550	0.739726	1	8.62007	7.46307	5.70405	4.5037	6.72138	2.28472	high
GSM1672551	0.90411	1	7.59728	6.66837	3.69513	6.33779	13.7593	3.11463	high
GSM1672552	6.49315	1	6.58249	6.40944	5.96747	6.8112	3.38672	0.834144	low
GSM1672553	8.63014	0	5.87628	5.75454	5.54322	7.10011	1.04882	0.478516	low
GSM1672554	7.9726	0	8.48019	7.2676	2.60863	4.79802	13.6049	3.82524	high
GSM1672555	0.328767	1	8.87811	6.02452	5.29153	4.27498	4.51153	1.41191	high
GSM1672556	2.9589	1	8.46567	6.38468	3.64504	3.9998	0.806397	0.774864	low
GSM1672557	3.61644	1	6.23582	6.35636	5.06135	5.4203	3.89944	0.842366	low
GSM1672558	6.08219	1	7.12626	6.18021	6.4656	9.89912	6.07938	1.05507	high
GSM1672559	1.06849	1	7.59653	5.54989	3.87551	7.25366	5.4586	0.890792	low
GSM1672560	7.39726	0	8.15757	5.6152	0.896437	8.1913	0.344038	0.373387	low
GSM1672561	6.9863	0	6.19764	5.93614	2.66961	6.74066	4.17522	0.604474	low
GSM1672562	5.83562	1	7.42626	6.72717	5.54322	8.10692	3.83638	0.934489	low
GSM1672563	5.26027	1	6.02551	5.11034	5.23493	8.41066	6.22725	0.759335	low
GSM1672564	5.34247	1	7.61743	4.91969	4.95374	8.30766	4.13751	0.708619	low
GSM1672565	5.58904	0	6.30292	6.0211	1.96074	5.96213	4.76409	0.660131	low
GSM1672566	5.26027	0	6.49115	5.06108	5.41048	4.35575	6.25102	1.06145	high
GSM1672567	5.17808	0	6.65247	6.79849	1.66335	4.29714	5.03182	0.876456	low
GSM1672568	1.06849	1	6.12478	6.02214	1.50613	4.9755	0.341446	0.377514	low
GSM1672569	7.80822	0	8.68119	6.50705	7.87542	7.3811	8.0043	2.36938	high
GSM1672570	6.08219	0	6.22658	5.50653	2.79447	6.55933	7.09769	0.837738	low
GSM1672571	4.68493	1	5.86165	2.84632	2.04678	8.93933	4.05542	0.290107	low
GSM1672572	4.60274	1	5.58696	5.08468	3.85812	4.11931	1.95734	0.479973	low
GSM1672573	3.94521	0	7.4096	6.6624	6.218	4.41497	4.76607	1.38704	high
GSM1672574	4.0274	0	6.23796	4.3956	1.96859	8.22076	3.63763	0.384171	low
GSM1672575	2.30137	0	6.1812	6.24335	4.78511	8.24912	6.19313	0.894217	low
GSM1672576	2.9589	0	6.36254	5.17562	4.47377	8.1135	1.27508	0.413451	low
GSM1672577	3.28767	0	7.33007	6.21259	8.39648	5.31457	7.47554	2.06059	high
GSM1672578	3.0411	0	6.71057	6.40005	4.40561	7.90958	5.85331	0.939008	high
GSM1672579	3.28767	0	5.85754	4.02494	1.58255	9.57436	1.7233	0.239385	low
GSM1672580	1.89041	1	8.36422	4.70001	4.86244	10.1733	8.36237	1.14816	high
GSM1672581	6.24658	0	6.4378	5.60677	7.71218	8.06446	6.58878	1.16318	high
GSM1672582	2.79452	1	6.21233	5.68779	5.65767	10.1127	9.10732	1.14255	high
GSM1672583	5.42466	0	6.94323	4.93736	5.7796	6.74803	7.575	1.17089	high
GSM1672584	2.38356	1	8.46567	6.29749	0.789785	5.30249	5.56893	0.991143	high
GSM1672585	0.575342	1	9.15365	6.7627	4.44617	4.25073	4.93597	1.61493	high
GSM1672586	4.35616	0	6.68966	5.26321	4.77004	8.16119	5.26538	0.742486	low
GSM1672587	5.17808	0	6.58125	5.11702	5.10424	7.33638	1.80274	0.502396	low
GSM1672588	1.89041	0	6.47201	4.65322	4.25213	10.4082	5.26661	0.542792	low
GSM1672589	5.09589	0	8.07372	6.48862	4.05635	4.06577	4.38034	1.19892	high
GSM1672590	0.575342	1	7.80007	6.13679	6.52814	9.73283	5.31215	1.07104	high
GSM1672591	2.13699	0	6.96373	6.99782	3.70697	5.15849	4.72198	1.03609	high
GSM1672592	3.28767	0	7.11387	5.83745	6.09517	8.62368	4.55118	0.864642	low
GSM1672593	2.46575	0	8.29382	5.44266	4.35938	10.1178	6.10699	0.921495	low
GSM1672594	3.28767	0	6.56106	6.5244	4.56926	7.62421	4.30729	0.796666	low
GSM1672595	6.90411	0	6.63699	5.41322	4.43972	9.72316	0.829028	0.381077	low
GSM1672596	1.47945	1	7.32877	5.80075	3.69418	8.91351	5.16347	0.760047	low
GSM1672597	2.05479	1	6.5756	5.63652	4.49771	8.74002	6.03051	0.800661	low
GSM1672598	6.57534	0	5.44518	5.79716	4.50881	4.3812	4.4006	0.741925	low
GSM1672599	0.986301	1	6.77041	6.70086	6.48818	3.74989	13.8759	4.22884	high
GSM1672600	2.63014	0	6.60949	5.59584	4.77659	6.79136	3.84251	0.704394	low
GSM1672601	8.63014	0	5.81219	5.46042	5.43895	9.40344	5.33358	0.664089	low
GSM1672602	6.65753	0	8.6513	7.29928	6.47112	5.91157	4.39182	1.64004	high
GSM1672603	6.16438	0	6.27646	6.93052	1.88019	10.3812	3.66045	0.49607	low
GSM1672604	7.9726	0	6.19655	5.83489	3.433	9.13878	3.55886	0.507566	low
GSM1672605	1.47945	1	6.06528	6.45351	6.99857	8.63978	4.48422	0.871342	low
GSM1672606	2.63014	1	7.99101	5.55462	4.15007	7.9864	4.89235	0.86282	low
GSM1672607	0.821918	1	7.72131	6.66976	5.47164	6.46241	13.8759	3.74464	high
GSM1672608	3.6937	1	7.42702	6.93782	8.58204	6.88201	5.24133	1.62942	high
GSM1672609	2.85699	1	5.84253	7.12534	3.93313	6.89497	5.27404	0.875008	low
GSM1672610	1.63068	1	6.71864	7.57331	4.51505	3.43225	6.83581	1.70145	high
GSM1672611	0.707671	1	7.39254	6.16816	7.84862	5.16434	6.72914	1.80893	high
GSM1672612	0.0435616	1	5.47365	6.101	3.47811	9.07686	4.48637	0.536671	low
GSM1672613	3.0863	1	7.08448	7.10295	3.01736	7.53211	3.99186	0.793373	low
GSM1672614	8.76	0	7.03148	7.06692	4.31374	6.77255	5.0632	1.05356	high
GSM1672615	10.1342	0	6.56955	6.09802	4.61437	5.46734	4.49203	0.878448	low
GSM1672616	4.66849	1	6.23368	6.65214	4.90013	6.72507	4.80416	0.896576	low
GSM1672617	2.47562	1	6.60868	5.85167	1.0377	6.07196	6.93954	0.808716	low
GSM1672618	1.09562	1	5.28245	6.02689	4.14696	6.52911	4.44897	0.638717	low
GSM1672619	8.71151	1	5.59188	5.64681	4.44186	8.62525	2.29324	0.434078	low
GSM1672620	3.65096	1	7.9496	7.18181	3.59667	4.62759	6.47142	1.57581	high
GSM1672621	1.71452	1	7.52869	7.07336	4.82299	5.30015	6.18867	1.50158	high
GSM1672622	2.27096	1	6.00975	6.22088	4.73996	4.72153	4.91221	0.918719	low
GSM1672623	6.09699	1	7.15766	6.82728	8.40067	5.09949	4.38189	1.51946	high
GSM1672624	7.89041	1	5.68397	5.93454	4.26368	7.14601	4.23856	0.633565	low
GSM1672625	3.39699	1	7.03614	7.27278	5.27147	5.29889	5.00627	1.2905	high
GSM1672626	0.464384	1	5.67733	6.26019	3.51946	4.58426	4.63128	0.767714	low
GSM1672627	0.0353425	1	7.46555	7.09619	4.43828	3.48139	4.65565	1.33397	high
GSM1672628	1.3611	1	5.67383	7.99202	3.97742	7.28263	4.90841	0.912392	low
GSM1672629	5.03096	1	5.65338	5.71922	5.06501	7.28098	4.21838	0.648163	low
GSM1672630	8.58658	0	6.55396	7.38171	6.87709	6.96188	6.40034	1.51079	high
GSM1672631	5.80274	1	6.73269	6.06341	5.10486	7.96284	4.03393	0.755836	low
GSM1672632	0.289315	1	8.10875	8.06381	10.1505	3.75596	11.5019	6.57291	high
GSM1672633	1.44164	1	6.17139	7.70918	2.33713	3.96688	6.45048	1.21392	high
GSM1672634	2.26521	1	7.14615	7.26209	4.30167	4.6811	4.43266	1.16225	high
GSM1672635	1.34712	1	7.76032	7.35456	6.02697	5.41146	7.03426	1.99564	high
GSM1672636	6.3863	0	5.57018	6.8599	2.51786	7.66216	4.1034	0.585	low
GSM1672637	7.73918	0	5.72211	5.96933	3.18389	8.30183	3.11465	0.470247	low
GSM1672638	6.03288	0	7.14731	6.34301	4.23088	3.5345	3.39192	0.945867	high
GSM1672639	3.71836	1	6.63212	6.27044	4.0807	6.46197	3.90463	0.758108	low
GSM1672640	0.00246575	1	5.93389	6.60018	0.537189	7.27505	5.93915	0.641439	low
GSM1672641	6.22438	1	4.83019	6.10734	2.82388	8.81638	4.46927	0.466395	low
GSM1672642	3.21041	1	6.32267	6.74427	8.51298	8.58795	5.81371	1.28468	high
GSM1672643	6.37808	1	6.5623	6.67732	2.42541	3.25107	4.12395	0.865645	low
GSM1672644	0.186575	1	6.12162	6.81419	3.04768	3.8767	7.27592	1.24726	high
GSM1672645	6.94027	0	5.72593	6.3139	4.49076	7.62956	3.92076	0.643109	low
GSM1672646	3.46685	1	8.25429	7.34246	4.82548	7.60693	6.33558	1.53996	high
GSM1672647	7.03973	1	5.3106	6.12112	4.3888	7.6986	9.68203	1.18948	high
GSM1672648	7.60438	0	7.40479	7.89336	2.77215	3.98168	3.26685	1.04914	high
GSM1672649	3.23507	1	6.52569	7.50065	5.01968	4.56716	3.49809	1.04884	high
GSM1672650	6.78082	0	6.13078	6.30227	5.61298	6.10659	4.45107	0.886547	low
GSM1672651	2.60548	0	5.88942	6.84848	4.65809	3.84412	3.85986	0.913512	low
GSM1672652	3.4537	1	5.79899	6.77469	8.3358	7.86893	5.34565	1.15809	high
GSM1672653	0.475068	1	5.71113	6.53419	-0.113711	6.24718	1.52965	0.355864	low
GSM1672654	0.632055	1	7.31127	7.56089	2.05741	6.20722	4.14048	0.894972	low
GSM1672655	3.93699	1	5.88841	6.39034	0.918561	6.63926	6.72386	0.732541	low
GSM1672656	4.83616	0	4.07049	6.88628	1.36684	3.81463	4.31173	0.551886	low
GSM1672657	6.70192	0	6.58692	6.48717	4.04442	6.28903	6.13922	1.03739	high
GSM1672658	2.01452	1	7.02796	6.5974	5.74001	3.45506	4.80707	1.32591	high
GSM1672659	0.577808	1	6.84495	7.03467	3.04768	6.09805	8.07755	1.38456	high
GSM1672660	0.791507	1	8.00041	8.55717	10.1127	6.62237	6.403	3.07097	high
GSM1672661	3.30493	1	4.55878	5.35384	3.50865	3.39285	4.88275	0.626514	low
GSM1672662	5.48137	0	5.39022	5.9286	3.81342	5.81916	3.2732	0.56013	low
GSM1672663	3.3674	1	8.39339	6.74014	2.74854	3.68213	4.36725	1.19011	high
GSM1672664	6.25644	0	8.06107	7.18859	2.56091	6.63044	2.12977	0.749645	low
GSM1672665	5.97041	1	5.36935	6.47854	3.06546	10.3744	11.5783	1.20826	high
GSM1672666	0.985479	1	7.19933	7.65681	3.93401	3.33807	3.52013	1.16901	high
GSM1672667	0.512877	1	7.3752	6.87388	3.89534	3.30328	6.68962	1.58007	high
GSM1672668	1.79836	1	5.73432	6.66385	6.2972	6.61965	7.72593	1.36888	high
GSM1672669	6.48082	0	6.89529	7.03149	3.95529	9.92616	8.37187	1.23473	high
GSM1672670	5.92192	0	5.94313	6.76463	5.06375	3.57714	0.893416	0.66136	low
GSM1672671	2.32192	1	6.76821	6.05796	4.00495	5.97243	6.71451	1.09012	high
GSM1672672	4.38822	0	7.22431	8.55084	4.76025	7.32736	3.77724	1.16629	high
GSM1672673	3.20795	0	5.94083	5.6593	4.74855	5.21005	6.00676	0.928268	low
GSM1672674	4.29041	1	5.12443	6.33865	4.16151	6.49625	3.89944	0.612887	low
GSM1672675	1.29616	1	7.43474	7.20688	7.86661	3.56682	5.61422	2.05638	high
GSM1672676	2.27342	1	8.44283	7.6254	6.70405	3.90772	4.22575	1.89413	high
GSM1672677	2.43863	1	5.83516	6.17828	6.01749	5.20298	3.58258	0.818603	low
GSM1672678	0.987945	1	7.45988	8.07632	3.91245	7.23419	3.87448	1.0605	high
GSM1672679	12.3436	0	8.19948	8.18754	3.92141	3.81691	4.43191	1.60278	high
GSM1672680	1.27151	1	7.6347	7.48874	3.93682	7.13541	3.37192	0.941968	high
GSM1672681	2.03342	1	5.32324	7.07608	3.69607	5.38751	5.24133	0.860336	low
GSM1672682	1.35534	1	7.2041	7.42091	3.45404	5.5114	7.26368	1.50703	high
GSM1672683	0.734795	1	6.43931	6.81868	8.03791	3.21284	6.90016	2.03252	high
GSM1672684	2.16822	1	5.43675	7.7064	7.645	2.86682	10.8265	3.22937	high
GSM1672685	1.49589	1	7.97366	7.72864	5.79882	4.08874	6.25436	2.10755	high
GSM1672686	6.53753	1	5.45052	6.0856	6.12538	5.98025	3.80446	0.752992	low
GSM1672687	2.52329	1	6.044	6.44647	4.83064	7.431	4.08601	0.73372	low
GSM1672688	6.64932	1	8.68327	7.83624	4.69999	4.36257	2.84825	1.3881	high
GSM1672689	0.961644	1	6.60583	6.72395	5.50641	6.86847	8.39973	1.57295	high
GSM1672690	2.72877	1	7.02009	5.91754	3.72069	9.35164	1.25402	0.441714	low
GSM1672691	3.49315	1	6.28008	5.5441	2.29943	6.9524	3.19897	0.486919	low
GSM1672692	10.0603	1	7.04478	7.09574	8.8307	3.8053	6.42235	2.2641	high
GSM1672693	2.48219	1	7.95275	7.26348	4.81043	6.14036	3.88311	1.1708	high
GSM1672694	6.45205	1	7.29596	6.61975	4.16234	7.77817	6.32197	1.11001	high
GSM1672695	6.01644	1	5.29685	5.43772	3.74904	5.80614	4.95842	0.629199	low
GSM1672696	5.3589	1	5.88841	5.33685	5.69958	6.61253	6.8677	0.973239	high
GSM1672697	11.9836	0	8.86758	7.69476	7.32873	7.47227	5.49049	2.02291	high
GSM1672698	6.05753	1	6.73175	6.94744	4.70721	7.12527	5.38227	1.04238	high
GSM1672699	0.271233	1	7.83841	7.38994	8.55103	4.53738	7.63658	2.89614	high
GSM1672700	1.60274	1	5.194	5.20419	1.93397	9.43722	3.75711	0.34852	low
GSM1672701	0.690411	1	7.85234	7.92837	6.87759	9.15708	5.07821	1.47706	high
GSM1672702	2.21096	1	6.45594	6.60257	9.25537	6.99153	4.95648	1.36025	high
GSM1672703	10.6685	0	7.67676	6.88393	1.52702	5.80807	4.98534	0.926255	low
GSM1672704	1.61096	1	7.4613	6.25397	3.15608	4.37822	1.97143	0.705879	low
GSM1672705	8.66301	1	6.39187	6.98473	4.13406	7.34347	4.03561	0.788763	low
GSM1672706	12.9452	1	6.85913	6.66976	6.38176	3.38411	3.73517	1.21573	high
GSM1672707	9.90411	1	6.65247	7.20774	6.18165	5.57615	2.73102	0.96691	high
GSM1672708	3.92877	1	6.17103	5.36366	4.25749	7.23339	7.66653	0.953233	high
GSM1672709	10.6849	1	6.9597	7.66424	2.52373	5.41912	5.88756	1.17506	high
GSM1672710	4.29863	0	6.42617	6.57688	0.789785	8.30364	4.04476	0.520947	low
GSM1672711	5.70411	0	5.31798	5.64473	1.53752	6.47014	5.15239	0.525804	low
GSM1672712	2.13288	1	6.91937	6.71094	4.88512	8.58445	3.37084	0.745597	low
GSM1672713	10.011	0	7.27882	6.80646	6.77374	6.98396	9.21072	2.16952	high
GSM1672714	2.67945	1	6.72735	6.26803	8.50232	7.64017	6.77639	1.51753	high
GSM1672715	3.30411	1	6.6317	6.7281	5.33694	7.55918	6.87248	1.23137	high
GSM1672716	1.19178	1	6.60191	6.56942	10.175	5.95928	6.23005	1.87859	high
GSM1672717	0.756164	1	6.64038	7.50478	4.76668	3.91456	11.1867	2.84535	high
GSM1672718	1.56164	1	7.68466	7.99452	8.46651	6.17737	3.76177	1.71317	high
GSM1672719	9.96164	0	7.06991	7.38128	5.25908	5.62683	4.07867	1.14931	high
GSM1672720	0.739726	1	8.89699	7.97851	4.80219	7.49837	6.44512	1.90603	high
GSM1672721	8.02192	0	8.76437	8.36968	5.16358	5.6616	4.38975	1.77746	high
GSM1672722	14.4575	0	6.37931	5.53512	5.49676	7.21099	6.55567	0.983054	high
GSM1672723	3.72329	1	7.452	8.01217	8.76408	7.16392	10.3571	3.65408	high
GSM1854798	3.42192	0	7.23521	5.20764	4.02243	7.74461	2.74383	0.559877	low
GSM1854799	2.89589	0	7.78045	7.56418	8.76433	7.45435	9.58567	3.19584	high
GSM1854800	2.80822	0	8.38008	7.96947	3.7882	8.66878	2.19077	0.87788	low
GSM1854801	2.45205	0	5.03356	5.96861	3.00022	6.40176	4.49199	0.557788	low
GSM1854802	2.52603	1	7.15359	7.27429	2.82158	6.14756	4.52781	0.943183	high
GSM1854803	2.6274	0	5.49551	6.42514	2.28233	10.5076	4.62682	0.473408	low
GSM1854804	2.65479	0	6.33261	6.32135	2.06276	9.38806	6.00074	0.660264	low
GSM1854805	2.28219	0	7.73871	6.31091	4.20505	3.41906	5.04732	1.2721	high
GSM1854806	2.4411	0	4.73442	4.00001	2.79362	8.35585	5.18905	0.373356	low
GSM1854807	1.43562	1	5.76755	6.28456	3.42643	10.9259	3.51445	0.453113	low
GSM1854808	2.83562	0	5.4987	5.21011	1.95504	7.73217	5.78207	0.524491	low
GSM1854809	0.117808	0	6.1849	5.28147	3.49981	6.33624	2.72024	0.502233	low
GSM1854810	2.53425	0	7.40687	7.44518	5.67711	4.91055	3.47897	1.22989	high
GSM1854811	2.88493	0	5.6893	5.80297	5.06815	5.24097	1.7258	0.549223	low
GSM1854812	0.0657534	0	5.27547	5.02817	2.40005	7.76722	5.04068	0.466617	low
GSM1854813	2.26027	0	5.78223	5.69344	2.28336	5.44595	1.41412	0.40563	low
GSM1854814	2.33973	0	6.02726	7.03495	6.96695	6.69667	2.91262	0.876427	low
GSM1854815	2.24658	0	7.16879	7.23781	8.37705	2.79502	5.76454	2.22149	high
GSM1854816	1.12877	0	7.01396	6.41761	4.00956	7.64219	4.42978	0.809673	low
GSM1854817	0.813699	0	6.0421	6.23879	5.50825	5.59832	5.18333	0.97091	high
GSM1854818	1.59452	0	7.59042	8.22836	8.56877	9.60351	9.04389	2.76132	high
GSM1854819	0.0767123	0	7.18027	5.93003	2.87814	7.12148	3.60972	0.649219	low
GSM1854820	0.060274	0	7.91309	6.62406	3.44437	6.16294	10.4282	2.1145	high
GSM1854821	3.45205	0	6.87726	5.71891	3.47347	8.41198	1.57955	0.453043	low
GSM1854822	3.8411	0	6.5968	5.38663	4.36904	3.54057	6.16725	1.07601	high
GSM1854823	2.18904	0	9.16895	6.29077	4.17195	2.41589	8.5233	2.58069	high
GSM1854825	3.6411	0	5.94604	6.45171	8.3944	7.61708	4.89278	1.08719	high
GSM1854826	4.07671	0	6.16468	3.70186	2.89721	6.5809	2.04406	0.336756	low
GSM1854827	1.5863	0	7.58395	8.67178	10.4024	7.96506	6.38089	2.76176	high
GSM1854828	3.24932	0	6.32359	5.23738	4.29322	7.52897	4.67288	0.647853	low
GSM1854829	3.15342	0	8.03337	6.98632	10.0214	3.7858	6.31651	2.83986	high
GSM1854830	3.62466	0	6.81129	6.40161	3.5389	4.26124	4.96771	0.992616	high
GSM1854831	0.860274	1	9.15771	6.81343	7.43578	3.96182	7.40712	2.94943	high
GSM1854832	3.0411	0	6.29961	5.62805	2.40569	5.03527	1.86379	0.476429	low
GSM1854833	4.09315	0	5.53334	3.67416	2.81039	8.20869	1.93919	0.269653	low
GSM1854834	2.80548	0	6.67981	6.79209	3.21829	7.48372	2.08462	0.572355	low
GSM1854835	3.10685	0	7.88742	5.82743	2.86213	8.76477	4.13473	0.684156	low
GSM1854836	1.39178	1	6.78371	5.10796	2.76322	6.21294	7.29532	0.895228	low
GSM1854837	0.126027	1	7.64196	5.99098	2.9137	9.00226	4.84277	0.731149	low
GSM1854838	3.3726	1	7.6831	7.72173	6.15436	9.49689	10.6746	2.57804	high
GSM1854839	2.51233	0	5.93771	6.93433	3.21113	6.66165	2.27076	0.563236	low
GSM1854840	1.33699	1	6.81755	4.69111	3.9065	6.93764	6.52588	0.811163	low
GSM1854841	2	0	8.58884	7.1253	5.01785	5.17738	9.98395	2.9281	high
GSM1854842	2.95616	1	4.98854	4.15622	3.04601	6.73212	7.32623	0.587772	low
GSM1854843	3.08767	0	5.2727	4.82881	3.60253	8.47465	2.55213	0.352884	low
GSM1854844	0.528767	1	5.40697	4.63014	5.32671	2.75409	4.41548	0.735491	low
GSM1854846	2.28219	0	7.17472	5.74732	6.84757	3.84785	8.65002	2.07186	high
GSM1854847	1.93973	0	6.16108	5.16577	2.64371	6.93633	8.54869	0.909491	low
GSM1854848	3.39726	0	6.10296	6.12439	2.82004	8.46111	5.52673	0.661106	low
GSM1854849	4.0137	0	6.06194	4.98511	7.38901	7.64787	6.6262	1.0007	high
GSM1854850	4.61644	0	6.17692	4.9086	8.33409	5.57595	4.09272	0.907784	low
GSM1854851	5.33973	0	5.48663	6.38267	3.6556	7.02478	2.25528	0.49066	low
GSM1854852	4.29863	0	5.03242	5.57173	2.77192	5.95993	1.77648	0.376273	low
GSM1854853	0.753425	0	8.19727	7.12641	2.78229	4.20544	9.23498	2.18822	high
GSM1854854	4.12877	0	5.48939	5.00343	2.9925	3.63103	1.97551	0.446793	low
GSM1854855	0.841096	1	7.80338	7.51299	5.26798	6.95944	8.29832	2.04508	high
GSM1854856	2.47945	1	7.27741	7.05364	3.95129	7.12424	6.89532	1.29967	high
GSM1854857	3.80274	0	6.05895	5.73748	3.10301	6.77084	2.69159	0.494745	low
GSM1854859	2.23014	1	7.13787	7.13415	2.94376	7.41722	6.61599	1.1166	high
GSM1854860	1.19452	1	5.69359	6.22815	2.73575	8.91863	7.09599	0.741197	low
GSM1854861	0.2	1	8.13659	8.14611	3.0813	3.24109	3.76655	1.39614	high
GSM1854862	4.3726	0	7.37059	6.29685	3.02936	6.80466	2.05007	0.601318	low
GSM1854863	4.07671	0	6.00023	5.15724	3.97108	6.94252	1.5788	0.417137	low
GSM1854864	1.09041	1	6.3556	5.45379	3.36334	8.88793	4.19074	0.535674	low
GSM1854865	4.44658	0	7.03253	5.4546	5.09308	6.35857	9.48017	1.57185	high
GSM1854866	3.39178	0	7.46363	6.77939	5.11861	2.78242	4.14721	1.32305	high
GSM1854867	4.05753	0	6.4427	5.43664	2.43542	3.66202	3.08393	0.601631	low
GSM1854868	1.17808	1	9.33066	8.80492	5.28881	3.8319	9.58431	4.49533	high
GSM1854869	2.11233	0	6.79177	5.61747	4.08363	6.45589	6.65611	0.991592	high
GSM1854870	3.03836	0	7.51851	6.52236	7.31077	9.41142	2.46928	0.83505	low
GSM1854871	3.06849	0	6.30544	5.25598	7.5184	4.99436	2.53653	0.774933	low
GSM1854872	2.31233	0	7.45173	5.00653	5.25134	10.2276	7.0133	0.914051	low
GSM1854873	2.97534	0	9.56123	7.77049	2.17565	1.84598	1.92607	1.30626	high
GSM1854874	2.3863	1	6.20529	3.97103	3.5063	10.0572	2.6029	0.321733	low
GSM1854875	2.91233	0	6.39591	7.14787	4.46795	8.35366	3.4338	0.725958	low
GSM1854876	2.48493	0	8.75971	7.4081	4.60239	5.54978	4.70622	1.52664	high
GSM1854877	2.12603	0	7.03442	5.49894	4.90514	10.015	8.9033	1.15229	high
GSM1854879	2.66849	0	5.18291	5.64865	2.98963	4.16717	2.41686	0.481314	low
GSM1854880	2.33425	0	6.30202	8.04345	5.69074	7.79082	7.45009	1.56839	high
GSM1854881	2.00548	1	5.89467	6.34286	3.60253	6.28139	6.75546	0.949494	high
GSM1854882	1.52603	0	7.21679	7.46925	6.05116	7.93591	4.83281	1.21586	high
GSM1854883	2.94247	1	8.41523	7.35981	2.82926	3.90103	10.544	2.82602	high
GSM1854884	0.89863	1	7.49553	7.06515	3.37201	9.05833	4.09345	0.797442	low
GSM1854885	1.44658	1	6.2289	5.57416	7.06808	7.15834	6.90788	1.16619	high
GSM1854886	1.13699	1	6.61456	7.82139	3.17847	4.498	8.24874	1.72426	high
GSM1854887	1.11233	0	8.03522	6.84042	7.53155	6.89876	9.92166	2.87417	high
GSM1854888	2.30137	0	6.03334	4.83968	5.89029	9.24219	4.59933	0.598721	low
GSM1854889	1.04932	1	8.51752	6.96497	5.23746	4.35045	2.22577	1.14995	high
GSM1854890	3.04658	0	6.75727	5.93041	7.21204	4.72172	7.98282	1.80039	high
GSM1854891	1.21096	1	8.98819	7.88534	9.05086	3.07712	6.84972	3.8598	high
GSM1854892	0.668493	1	8.93429	8.74702	10.3646	6.71899	5.54675	3.32499	high
GSM1854893	0.00821918	1	7.22277	6.97033	5.20142	5.68502	10.145	2.33757	high
GSM1854895	0.857534	1	8.93534	7.34351	5.63246	3.26145	10.3534	3.97928	high
GSM1854896	2.86301	1	6.58316	6.24653	2.73341	10.2095	4.82773	0.590317	low
GSM1854897	0.950685	1	7.73682	6.19118	2.64697	9.6298	2.29401	0.522096	low
GSM1854898	0.0438356	0	6.95523	6.42226	4.84473	5.94241	1.85966	0.697697	low
GSM1854899	0.358904	1	7.3537	6.32135	4.28452	8.6955	7.7838	1.22577	high
GSM1854900	2.48493	0	6.27134	4.60171	2.0988	11.4697	4.17447	0.351922	low
GSM1854902	0.0739726	0	5.84215	3.59485	3.01214	6.8897	2.35848	0.325217	low
GSM1854903	1.52877	1	7.54195	7.92532	3.15391	3.16548	10.756	2.99086	high
GSM1854904	2.90685	0	7.45033	6.29931	5.80912	4.86181	7.72102	1.79085	high
GSM1854906	3.13973	0	7.5643	6.50835	3.33833	3.67439	3.61315	0.972409	high
GSM1854907	2.93151	0	6.46739	4.8885	2.75512	7.19247	7.6211	0.807821	low
GSM1854908	3.12603	0	7.15637	7.30245	4.36422	8.60862	6.2793	1.16074	high
GSM1854909	2.43562	0	7.48543	6.88125	6.88159	8.642	5.03043	1.22162	high
GSM1854910	3.14247	0	7.40601	6.32318	5.16908	5.33279	5.17404	1.19065	high
GSM1854911	2.73699	1	7.71472	6.10778	3.73842	3.51866	2.60657	0.862959	low
GSM1854913	1.85205	0	7.33917	6.95967	3.38472	5.73532	6.10152	1.21409	high
GSM1854915	0.383562	0	6.96795	6.38438	2.99388	7.68728	8.67678	1.23946	high
GSM1854916	3.1589	0	7.79496	5.70873	7.80433	5.57863	8.33942	2.12627	high
GSM1854917	3.39452	0	6.02315	5.42074	2.43252	8.67141	1.92892	0.356318	low
GSM1854918	3.16712	0	5.59259	5.5013	5.2982	6.14557	3.11033	0.592674	low
GSM1854919	2.69041	0	5.4026	5.50696	8.9481	8.31243	4.839	0.865383	low
GSM1854920	2.60274	0	5.54926	4.5544	4.95941	9.40615	1.97173	0.34927	low
GSM1854921	0.136986	1	8.31104	7.32252	9.59828	5.15269	2.68129	1.74961	high
GSM1854922	3.15068	0	6.24994	4.95825	2.36338	9.52978	2.75543	0.358684	low
GSM1854923	3.63288	0	6.74245	4.6048	2.59543	6.47769	3.52097	0.497581	low
GSM1854924	0.339726	0	5.93454	5.21217	3.22233	10.2388	3.29723	0.393059	low
GSM1854925	0.734247	0	7.46862	6.81813	4.27548	4.85493	2.0748	0.837413	low
GSM1854926	0.717808	0	7.40423	6.54791	3.31987	8.3174	2.51103	0.621286	low
GSM1854927	0.208219	1	8.21719	7.4307	7.79532	8.48667	9.0374	2.68488	high
GSM1854928	3.39452	0	6.36746	5.05714	4.29978	8.22063	8.24305	0.950035	high
GSM1854929	1.87123	0	5.74959	5.22527	4.9339	5.8712	6.39849	0.86426	low
GSM1854930	2.53699	0	5.42492	4.35836	2.12084	9.34299	5.55178	0.405652	low
GSM1854931	2.61918	0	5.90185	6.04277	4.39203	7.7142	4.11173	0.639665	low
GSM1854932	2.19726	0	5.96736	6.43586	5.39502	4.72126	8.97441	1.66283	high
GSM1854933	2.2411	0	8.76025	8.77641	2.58059	2.32969	1.8981	1.35446	high
GSM1854934	2.32603	0	5.8894	5.51384	2.13596	8.19636	2.1346	0.364652	low
GSM1854935	1.40274	1	6.4069	7.0164	2.54662	4.73202	4.76159	0.889037	low
GSM1854936	2.63562	0	5.71632	4.49691	7.44052	6.45799	3.32885	0.631258	low
GSM1854937	2.66301	0	6.31346	6.61605	4.93823	9.79694	3.38285	0.625496	low
GSM1854938	0.216438	0	8.57125	9.13857	8.30597	2.43109	11.2554	7.43033	high
GSM1854940	2.59452	0	5.65692	6.14372	2.33608	9.03093	6.05617	0.612157	low
GSM1854941	1.88767	0	7.66188	7.69272	5.18616	6.52172	2.21915	0.981501	high
GSM1854942	1.44384	0	7.82535	6.64141	5.86212	4.9068	7.15358	1.86424	high
GSM1854944	3.19452	0	6.98909	6.70532	6.58212	6.92501	4.17332	1.07428	high
GSM1854945	5.43562	0	7.82583	8.02217	7.82197	5.12735	6.54041	2.50848	high
GSM1854947	0.769863	1	9.00179	7.07759	3.508	8.55746	5.9357	1.31893	high
GSM1854948	0.849315	1	5.80316	5.22444	7.45407	4.33665	4.70329	0.971235	high
GSM1854950	2.39452	0	5.65325	5.47902	2.65878	5.93488	5.98334	0.683681	low
GSM1854951	0.219178	1	6.65369	5.79794	3.13392	9.13592	6.44649	0.755718	low
GSM1854952	3.03014	0	6.65467	5.64669	3.89782	5.88594	4.10227	0.722494	low
GSM1854953	4.87397	0	6.2018	6.44022	2.89261	4.68849	8.40893	1.28743	high
GSM1854954	2.72877	0	8.11968	8.0126	8.51318	8.05199	11.0044	4.05411	high
GSM1854955	2.07671	0	6.83908	5.54676	7.13249	5.8357	6.27961	1.28595	high
GSM1854956	1.26027	1	9.22012	7.79096	4.49563	7.21466	3.68328	1.36321	high
GSM1854957	0.775342	1	5.86579	5.37919	2.24772	5.2537	3.74637	0.52864	low
GSM1854958	2.52329	0	5.73253	5.99959	6.26996	8.9766	3.48866	0.626016	low
GSM1854960	2.6	0	5.65847	6.14408	2.66414	5.93408	2.5463	0.49332	low
GSM1854961	0.309589	1	8.2934	7.76613	3.65245	5.34776	1.82381	0.975391	high
GSM1854962	2.2137	0	5.86269	3.82362	5.64726	7.56123	6.81539	0.715802	low
GSM1854963	0.0958904	1	7.69557	6.49487	9.14787	5.20771	9.93928	3.33176	high
GSM1854964	1.7589	0	6.42645	6.50197	3.96939	4.89041	8.74795	1.52484	high
GSM1854965	1.86301	1	7.50561	7.70304	2.89123	4.44127	7.89164	1.81181	high
GSM1854966	0.0630137	1	5.21904	4.52009	2.74471	9.36355	3.84481	0.343826	low
GSM1854967	2.53151	0	5.47551	6.57895	8.31234	7.29306	10.4708	2.10202	high
GSM1854969	0.975342	0	7.80526	6.95477	4.52729	2.27414	2.68798	1.16763	high
GSM1854970	1.07397	0	5.69144	7.61053	2.86643	4.04029	1.5621	0.629613	low
GSM1854971	1.33973	0	6.85853	7.16484	2.48173	5.44357	8.0715	1.40095	high
GSM1854972	2.51781	0	5.31735	5.08814	2.0691	4.70134	2.68561	0.415164	low
GSM1854973	2.50137	0	6.09368	6.63022	4.8076	3.99852	1.83231	0.709522	low
GSM1854974	2.30137	0	5.78223	6.33167	2.31541	10.4322	3.78739	0.44209	low
GSM1854975	2.49589	0	8.68828	8.55105	2.21404	3.18118	10.4162	3.44696	high
GSM1854977	1.89589	0	7.11352	6.48451	2.42827	9.98682	2.10818	0.465827	low
GSM1854979	2.05753	0	6.15347	6.05838	3.28358	10.225	2.95122	0.44596	low
GSM1854980	2.05205	0	4.65437	5.58798	4.93748	7.58713	8.89915	0.951647	high
GSM1854981	1.61918	1	7.37147	7.58499	2.72406	4.37031	8.10458	1.77196	high
GSM1854983	0.317808	1	6.46288	7.47619	6.87859	6.01868	9.29586	2.30428	high
GSM1854984	0.0547945	0	6.5049	6.32685	3.54808	2.98434	8.96839	1.67531	high
GSM1854985	1.88219	0	6.17836	7.05327	2.46334	5.21582	3.74217	0.732235	low
GSM1854986	1.58082	0	7.55333	7.82181	4.37837	6.07808	10.7757	2.74801	high
GSM1854987	2.56712	0	5.1293	6.08353	4.91107	5.22346	2.76212	0.592214	low
GSM1854988	2.15068	0	4.97749	6.08917	2.94269	10.4119	7.80243	0.660003	low
GSM1854989	2.63562	0	6.10911	5.93382	5.03743	9.36088	6.40386	0.826161	low
GSM1854990	2.27397	0	5.51992	6.0383	2.25959	6.45589	2.5506	0.443984	low
GSM1854992	1.51781	0	6.82972	6.37148	6.67352	4.40451	10.5211	2.60159	high
GSM1854994	2.47945	0	6.25961	6.27188	2.49133	7.36248	2.06458	0.467095	low
GSM1854995	1.3589	1	7.7697	7.72296	2.48421	5.0451	7.90051	1.75819	high
GSM1854996	1.78356	1	6.57048	6.50411	3.8812	7.90214	3.29179	0.647383	low
GSM1854997	1.64384	1	5.44134	5.62969	8.68452	8.3132	8.06767	1.29755	high
GSM1854998	2.33425	1	5.67933	5.78146	7.16647	7.24815	7.04788	1.13129	high
GSM1854999	2.45753	0	6.27388	6.36429	4.54563	7.51212	3.6545	0.689317	low
GSM1855000	2.21096	0	8.45437	8.57392	8.88788	5.93648	5.18652	2.64995	high
GSM1855001	1.33425	1	7.70725	7.36804	5.23056	5.59755	6.97914	1.81384	high
GSM1855003	2.32329	0	6.30742	5.47577	4.63044	6.57414	1.89483	0.518104	low
GSM1855004	2.81918	0	7.38568	5.80337	2.36768	5.2819	3.33142	0.67993	low
GSM1855005	2.67671	0	7.53277	5.86032	3.00478	8.94419	5.24623	0.750146	low
GSM1855006	2.70685	0	6.6382	5.90944	8.74874	6.87883	9.43027	2.11711	high
GSM1855007	3.09589	0	6.40942	5.88767	4.18182	8.89547	3.36818	0.56006	low
GSM1855008	2.25479	0	6.1987	6.74925	2.78269	9.67022	5.59697	0.688369	low
GSM1855009	2.07123	0	8.3009	8.08706	5.81641	1.70129	4.36146	2.14716	high
GSM1855010	1.86575	0	7.1064	5.89	2.70475	5.9329	5.46959	0.854055	low
GSM1855011	2.7726	0	7.83624	6.93547	4.37799	9.04495	2.05474	0.698145	low
GSM1855012	2.95616	0	8.09171	8.08961	8.77211	3.13874	7.05527	3.46851	high
GSM1855014	3.06575	1	6.52936	6.46622	5.63888	8.05139	9.7477	1.66234	high
GSM1855015	2.37808	0	5.86789	4.88809	2.9047	9.0952	3.64534	0.403744	low
GSM1855016	2.72329	0	8.20355	7.37989	7.90538	7.34464	8.99498	2.86824	high
GSM1855018	2.40548	0	6.93233	6.65766	5.46411	7.84932	8.26249	1.50644	high
GSM1855019	0.980822	1	7.42972	6.67531	4.80878	5.85613	4.88918	1.14082	high
GSM1855020	3.25753	0	8.51595	8.27307	2.4089	6.23497	6.4252	1.64189	high
GSM1855021	2.43836	0	7.8983	7.2026	7.1501	6.65785	5.41151	1.66138	high
GSM1855022	2.27671	0	8.35693	7.27471	2.17565	5.90405	7.75969	1.62432	high
GSM1855023	3.21644	0	9.40208	7.899	2.71035	2.87325	1.8347	1.26483	high
GSM1855024	2.75616	0	6.96751	6.20043	5.05438	7.91177	7.73002	1.26826	high
GSM1855026	2.84384	0	7.32327	7.8825	2.28945	6.94205	8.09254	1.506	high
GSM1855027	2.29315	1	7.99515	7.40393	2.13876	5.31951	3.50708	0.952801	high
GSM1855028	2.49589	0	8.42755	7.3484	9.14747	5.5443	2.12357	1.5628	high
GSM1855029	2.13699	1	9.869	9.01106	8.5938	5.16972	9.84407	6.42157	high
GSM1855031	2.83014	0	6.2445	6.88373	7.27264	10.2146	2.79019	0.7186	low
GSM1855032	2.2411	0	7.31529	7.35981	2.90011	9.28146	8.83844	1.39001	high
GSM1855033	2.76986	0	8.63152	8.22836	2.8552	4.06331	5.97186	1.86888	high
GSM1855034	2.21644	0	6.43486	5.29101	1.92268	6.00955	2.65018	0.459084	low
GSM1855035	2.94247	0	7.13096	6.26795	2.4241	9.5183	6.16197	0.772148	low
GSM1855036	2.55342	1	6.10814	5.44034	4.85226	8.04173	2.52062	0.503172	low
GSM1855037	2.89589	0	8.52092	7.82467	3.47695	3.37734	6.97253	2.15998	high
GSM1855038	2.3863	0	8.19487	6.77301	6.50133	5.32061	5.40098	1.66657	high
GSM1855039	0.731507	1	7.49276	7.71176	4.08614	5.69999	10.5122	2.58421	high
GSM1855040	2.21096	0	7.10595	7.36693	3.27944	4.57339	2.84244	0.884293	low
GSM1855041	1.02192	0	7.29221	6.91216	2.15151	7.89005	3.45387	0.672746	low
GSM1855042	2.56712	0	6.35211	7.60194	4.29394	9.77712	6.74899	1.05458	high
GSM1855043	2.81918	0	7.90733	7.79254	4.49302	2.99656	3.77608	1.47276	high
GSM1855044	2.70411	0	5.79792	5.70873	5.26598	6.55574	4.14174	0.697876	low
GSM1855045	2.35616	0	6.23184	7.22142	7.47098	5.1353	2.4653	1.01442	high
GSM1855046	2.5726	0	6.19717	5.25767	2.67048	8.06485	2.39332	0.40112	low
GSM1855047	2.79178	0	8.04143	7.43034	5.07132	3.43647	4.28058	1.55091	high
GSM1855048	1.7863	1	6.5507	4.08404	3.9454	3.23105	3.74566	0.63416	low
GSM1855049	0.6	1	6.62948	7.80849	2.80661	7.58872	8.83645	1.4801	high
GSM1855050	1.91233	0	6.94919	7.81448	7.31764	7.73274	2.68067	1.06677	high
GSM1855051	1.70411	0	6.15252	5.75956	8.08306	5.42887	7.69567	1.5968	high
GSM1855052	2.60548	1	6.67307	5.87843	3.86152	11.5015	8.33895	0.894865	low
GSM1855053	2.78082	0	6.12345	6.72359	3.13675	7.67117	1.92036	0.500548	low
GSM1855054	2.46575	0	5.79213	5.92702	2.55764	3.96597	3.09656	0.584273	low
GSM1855055	2.94795	0	6.46441	6.70101	2.89831	6.67258	2.34399	0.577016	low
GSM1855056	2.90685	0	5.95224	4.04397	2.4484	4.04572	1.98857	0.384332	low
GSM1855057	0.208219	0	6.23338	6.56968	2.79819	5.42966	2.29873	0.581691	low
GSM1855059	1.61096	0	6.24553	6.82311	4.52018	7.78174	3.72584	0.72909	low
GSM1855060	2.83014	0	7.7405	8.2505	3.80847	2.45907	5.99733	1.97947	high
GSM1855061	2.07945	1	5.97935	6.18341	2.2282	6.0088	6.17055	0.784821	low
GSM1855062	1.64384	1	8.40972	8.35939	9.79012	4.7819	6.96088	3.70419	high
GSM1855063	0.956164	1	5.53334	5.47457	2.6359	7.48567	8.5515	0.837937	low
GSM1855064	2.68493	0	7.07014	6.63086	4.00535	6.96949	6.99847	1.21312	high
GSM1855065	1.98356	0	6.77933	6.21843	5.2574	7.13088	6.26022	1.09977	high
GSM1855066	2.73151	0	5.8952	7.68762	5.72333	7.25099	9.5163	1.87584	high
GSM1855067	2.70411	0	6.03334	5.5896	3.14835	9.22517	7.95675	0.80161	low
GSM1855068	2.82466	1	6.87396	7.62357	3.01671	6.03186	7.80243	1.47303	high
GSM1855069	0.835616	0	6.28041	6.67879	3.41053	6.72069	4.78113	0.791749	low
GSM1855070	2.72329	0	5.46316	6.92533	2.2561	7.79244	3.02807	0.492506	low
GSM1855071	1.63562	0	5.95331	6.74526	2.71517	10.4658	6.02222	0.661223	low
GSM1855072	1.86027	0	6.87773	6.81881	2.42593	3.99347	3.03919	0.773374	low
GSM1855073	2.85479	0	5.45938	5.97917	5.57353	3.90504	6.36103	1.10699	high
GSM1855074	2.00822	0	5.49499	5.91749	4.79191	7.66752	5.21033	0.703655	low
GSM1855075	2.45753	0	6.45847	7.04594	2.44448	6.70802	1.84678	0.547376	low
GSM1855076	2.51233	0	5.91852	6.32499	2.87486	7.33761	7.04313	0.864189	low
GSM1855077	2.34247	0	6.06662	6.09632	5.49353	8.65463	6.20698	0.893911	low
GSM1855078	2.41644	0	7.30195	7.15937	4.40005	5.95873	3.82313	1.01075	high
GSM1855079	0.920548	1	6.55937	6.93803	8.27774	8.47085	8.75388	1.95461	high
GSM1855080	1.83836	0	6.15704	5.69659	7.2966	7.70006	5.1581	0.931783	low
GSM1855081	2.12877	0	7.06877	6.58723	3.56907	7.21418	5.19892	0.91113	low
GSM1855082	1.63014	0	6.05343	6.05431	4.15489	9.49266	2.18533	0.451342	low
GSM1855083	2.27945	0	7.34725	7.43868	9.8269	2.71884	4.65619	2.34309	high
GSM1855084	2.51781	0	5.13863	5.35802	2.8821	4.33841	9.99981	1.15681	high
GSM1855085	2.66027	0	6.5827	6.31809	10.5759	2.73088	5.59594	2.11131	high
GSM1855086	2.41644	0	7.50983	4.96431	2.77812	4.01079	5.11925	0.855265	low
GSM1855087	2.56986	0	4.91563	5.86148	2.87307	7.93364	2.33555	0.369733	low
GSM1855088	1.28219	0	6.24994	6.52415	4.63888	7.88607	2.28707	0.58438	low
GSM1855089	2.28493	0	5.48338	6.44134	2.40825	6.57458	10.2608	1.23971	high
GSM1855091	2.56438	1	5.8804	5.30626	3.04144	8.87224	5.25733	0.541746	low
GSM1855092	2.00548	0	6.4679	5.86264	4.66264	9.58651	3.94999	0.605149	low
GSM1855093	2.09863	0	6.21813	5.63593	3.81804	7.975	5.46959	0.698153	low
GSM1855094	1.66301	0	7.79867	8.10992	3.80498	5.76103	6.12557	1.61478	high
GSM1855095	1.58356	0	8.85014	7.81366	8.03758	5.14988	6.93304	3.03175	high
GSM1855096	2.23562	0	9.04265	8.48626	4.86946	6.5445	2.04973	1.29814	high
GSM1855097	2.33699	0	6.32004	6.73815	7.36016	7.97386	4.44675	1.01383	high
GSM1855098	2.07945	0	4.94884	5.15419	2.20621	7.97912	3.05064	0.342443	low
GSM1855099	2.51233	1	5.92467	5.08394	5.6928	8.03868	1.99782	0.467869	low
GSM1855100	2.37808	0	7.21588	6.695	3.80464	6.61311	4.3016	0.897693	low
GSM1855101	2.52055	1	6.54386	8.39461	5.277	4.82552	2.1324	1.02419	high
GSM1855102	1.66301	0	7.07343	7.78455	2.16748	6.85174	2.61982	0.716647	low
GSM1855103	1.55616	0	10.2556	8.3859	5.2549	5.45269	1.89773	1.66899	high
GSM1855104	0.268493	1	4.45756	6.82387	2.9949	5.65055	2.50888	0.476774	low
GSM1855105	1.52055	0	5.82104	5.66851	4.15346	5.3581	4.05512	0.671939	low
GSM1855106	0.838356	1	7.22321	7.53504	2.89759	5.8727	2.72852	0.811406	low
GSM1855107	2.48219	0	7.91406	7.06367	7.47894	8.63303	8.41155	2.15923	high
GSM1855108	2.51507	0	6.48816	7.39096	8.54923	2.61597	11.1307	4.12415	high
GSM1855109	1.89863	1	8.85637	8.39092	7.50198	4.9572	10.1017	4.75665	high
GSM1855110	1.86301	0	7.00426	7.17445	2.90791	5.98541	2.41501	0.709742	low
GSM1855111	1.47671	0	5.77759	7.05475	3.02756	9.87021	2.09538	0.441009	low
GSM1855112	2.24658	0	5.95485	5.43132	3.82148	7.09777	6.16783	0.749754	low
GSM1855113	2.05479	0	5.58075	4.16759	2.24772	8.29276	2.70118	0.304927	low
GSM1855114	1.93973	0	6.26878	7.31421	8.62725	7.82043	9.59281	2.36554	high
GSM1855116	1.8411	0	8.20306	7.62669	10.0357	5.85117	8.34493	3.64635	high
GSM1855117	1.28767	0	8.3244	8.64157	6.16742	6.04288	9.35158	3.44534	high
GSM1855118	0.147945	0	8.32538	8.53772	8.54958	4.91096	9.88926	4.81511	high
GSM1855119	2.13699	0	6.46288	5.11891	7.52759	6.89264	4.50054	0.882923	low
GSM1855120	0.591781	1	7.63826	7.40999	8.42799	4.73244	10.5914	3.98573	high
GSM1855121	0.805479	1	6.86094	6.02284	4.21865	7.83139	8.21822	1.20417	high
GSM1855122	2.07397	0	5.74367	7.89057	7.55255	4.58637	4.23638	1.359	high
GSM1855123	2.08219	0	6.43486	6.48305	2.37733	6.80935	8.52047	1.13854	high
GSM1855124	2.98356	0	7.1812	6.00635	2.20621	3.60281	5.04474	0.922692	low
GSM1855125	0.0465753	1	6.63632	6.78605	3.9867	6.89309	6.65425	1.11811	high
GSM1855126	1.58082	0	6.11423	5.01704	7.67971	5.66135	2.80691	0.730448	low
GSM1855127	1.47671	0	5.56951	6.37503	3.78058	8.80351	2.82174	0.481955	low
GSM1855128	2.48219	0	5.94657	7.01822	6.62524	8.80816	8.19447	1.42126	high
GSM1855129	1.72055	0	5.97258	6.89374	3.9279	9.52113	2.568	0.520609	low
GSM1855131	1.90685	1	6.39237	6.26133	3.99389	4.87175	6.69919	1.13518	high
GSM1855132	2.35068	0	5.90819	6.71733	3.2176	6.84288	10.4282	1.48857	high
GSM1855133	1.92055	0	5.58992	5.55362	2.48477	7.11928	2.56331	0.40829	low
GSM1855134	1.04658	1	5.51612	5.83093	2.39299	8.76566	5.03408	0.51359	low
GSM1855135	1.47671	0	7.03768	8.28732	8.63568	6.16533	7.62215	2.67649	high
GSM1855136	0.0109589	1	6.36697	6.87226	5.63443	6.43706	7.08153	1.36782	high
GSM1855137	1.52603	0	6.59339	6.37465	3.99593	5.69067	6.49423	1.10284	high
GSM1855138	1.69589	0	7.68031	7.59309	3.49744	4.02975	2.19515	0.971404	high
GSM1855140	2.27397	0	5.98665	6.32283	4.07368	10.3284	8.25627	0.937662	high
GSM1855141	2.24932	0	5.41671	5.08437	2.68781	8.27634	1.90126	0.322651	low
GSM1855142	2.27671	0	7.10918	7.68086	4.47627	9.13162	5.04068	1.02274	high
GSM1855143	1.61918	0	5.21288	6.18189	4.11381	6.44332	1.61988	0.455459	low
GSM1855144	2.32877	0	4.56426	6.42655	5.99143	2.95825	7.75487	1.3583	high
GSM1855145	2.21644	1	6.90114	6.70709	4.82603	7.87711	8.93402	1.54959	high
GSM1855146	0.389041	0	5.90346	6.41032	6.03126	8.13123	6.4607	1.02427	high
GSM1855147	2.21096	0	6.36102	6.5116	7.58962	8.18076	7.02271	1.37005	high
GSM1855149	2.27945	0	5.88625	5.33182	3.49744	6.99592	7.1801	0.810927	low
GSM1855150	0.268493	1	8.61826	7.84854	5.93013	2.13978	9.20151	3.91003	high
GSM1855151	2.1863	0	5.24735	6.50658	2.87559	9.42724	1.60413	0.356881	low
GSM1855152	2.18904	0	6.0774	6.54438	2.49993	8.30839	1.98515	0.442581	low
GSM1855153	0.890411	1	6.29747	7.58611	7.13141	5.45668	8.5102	2.19489	high
GSM1855156	2.67945	0	7.48772	7.74632	3.83947	6.7918	4.38496	1.10207	high
GSM1855157	2.20822	0	5.59205	5.77828	5.00899	3.90594	8.53685	1.36688	high
GSM1855158	1.91233	0	5.46425	5.81729	2.62455	3.68174	2.58037	0.524881	low
GSM1855159	2.3589	0	5.74524	5.75254	5.88784	8.06916	3.32657	0.605272	low
GSM1855160	0.890411	0	6.80801	7.31567	3.28736	7.33011	6.28869	1.08718	high
GSM1855161	0.909589	1	7.54146	7.40053	5.81555	7.31756	3.1288	1.03912	high
GSM1855162	2.01096	0	5.66328	6.20043	2.38522	7.192	1.99468	0.41905	low
GSM1855163	2.37534	0	6.58801	7.52312	2.20282	3.78715	1.87431	0.708156	low
GSM1855164	2.27397	0	6.69122	6.30798	3.5608	4.53933	2.64128	0.707226	low
GSM1855165	1.48219	1	5.59626	5.59043	2.3092	6.75231	3.89119	0.488822	low
GSM1855166	1.86027	0	7.45123	6.57394	8.24234	6.32756	9.81799	2.75328	high
GSM1855168	0.109589	1	6.04772	5.8565	6.52758	9.72957	9.4982	1.32955	high
GSM1855169	2.0274	0	4.88671	4.15704	2.82628	6.06502	4.74631	0.428581	low
GSM1855170	1.47945	0	5.70528	6.39357	4.95043	8.52253	3.03459	0.572353	low
GSM1855171	3.16438	0	7.61371	6.98852	2.235	5.24251	8.45493	1.58809	high
GSM1855172	2.18356	0	5.40639	6.35417	2.73064	6.03694	4.93163	0.660719	low
GSM1855173	1.85205	1	6.06612	7.55985	5.10345	2.64189	2.36443	0.973843	high
GSM1855174	1.47945	0	6.78224	6.92356	5.80831	4.24001	1.60559	0.862166	low
GSM1855175	1.0411	1	6.53565	7.67366	5.00577	7.29675	8.08189	1.61165	high
GSM1855176	3.69863	0	7.21813	7.69543	7.87406	9.68345	10.9272	2.84669	high
GSM1855177	1.56164	0	5.28153	6.56822	4.52729	10.1558	7.53746	0.842235	low
GSM1855178	0.158904	1	7.57795	7.93434	3.0322	5.6146	10.3534	2.43022	high
GSM1855179	0.0136986	0	7.33137	7.40431	6.76364	6.59249	9.61608	2.58236	high
GSM1855180	1.51781	0	6.1321	6.16813	6.96334	4.92673	7.13936	1.47653	high
GSM1855181	1.46301	0	7.0368	7.04705	2.55261	5.36994	7.78273	1.37814	high
GSM1855182	0.0109589	0	5.1293	6.69752	5.65344	6.80765	3.80412	0.717534	low
GSM1855183	4.63562	0	6.71272	6.46549	2.77969	7.80022	2.56049	0.54735	low
GSM1855184	0.610959	1	6.93185	7.05813	5.39299	7.98197	8.65375	1.65796	high
GSM1855185	2.9726	0	6.87866	7.47698	2.66127	6.27243	10.8463	2.01274	high
GSM1855187	2.49863	1	6.23639	5.29557	5.1588	3.77406	1.82723	0.617415	low
GSM1855188	3.71781	1	5.85628	5.66811	4.18575	7.59493	7.60646	0.918429	low
GSM1855189	2.31233	1	6.69514	6.16036	3.73399	7.58614	8.11417	1.15143	high
GSM1855190	1.42466	1	7.20801	7.88898	7.69958	9.26814	4.18574	1.27314	high
GSM1855192	0.654795	1	5.30366	5.70243	7.59061	8.01533	3.80587	0.696838	low
GSM1855193	0.956164	0	7.83483	6.6816	7.08773	6.61766	2.31766	1.02823	high
GSM1855195	2.80822	1	6.32757	5.65662	5.46978	8.22941	3.65926	0.647496	low
GSM1855196	4.27397	1	6.9576	7.61449	6.64355	5.36408	6.5312	1.83095	high
GSM1855198	1.54521	1	7.36329	6.41326	7.5512	7.42966	7.17118	1.67048	high
GSM1855199	0.80274	1	7.44798	7.7805	8.05249	3.65207	9.8252	3.85442	high
GSM1855200	2.88493	1	7.19683	7.5552	2.46755	4.15123	2.13815	0.807012	low
GSM1855202	1.71781	1	7.26118	7.14316	2.53643	6.55122	7.82889	1.34964	high
GSM1855203	1.08219	0	7.19272	8.69025	9.7086	3.2191	9.46015	4.85401	high
GSM1855204	2.7589	1	6.6494	7.03342	3.12491	4.87849	5.87043	1.10821	high
GSM1855206	1.86575	1	8.09876	7.386	2.85367	2.61324	2.22069	1.03733	high
GSM1855207	3.54247	0	8.29945	9.15812	3.88927	6.30965	3.5945	1.45152	high
GSM1855208	3.54247	1	6.44564	7.53812	2.68019	9.90285	1.88851	0.495391	low
GSM1855209	2.65205	1	7.12685	7.69781	2.82004	3.19696	2.14421	0.894803	low
GSM1855210	5.04932	0	5.79109	6.96275	2.63917	9.95182	2.1776	0.423047	low
GSM1855211	4.4274	0	8.63758	7.72296	2.71233	4.85745	5.03445	1.44603	high
GSM1855212	4.27123	0	6.49849	5.43173	2.92329	8.89358	3.67034	0.491267	low
GSM1855213	4.66575	0	5.47881	6.7332	8.18194	8.72857	3.11755	0.775569	low
GSM1855214	5.02466	0	5.27928	5.13024	2.7256	5.80039	1.85966	0.370891	low
GSM1855215	4.24932	0	5.57417	6.70672	2.69059	7.34744	1.69447	0.438077	low
GSM1855217	4.25753	0	4.79255	4.82449	7.69203	7.39112	3.11543	0.542432	low
GSM1855218	1.33973	1	5.05595	5.65138	3.67863	7.65193	6.44241	0.668392	low
GSM1855219	0.591781	1	5.54333	7.19707	6.42504	7.63251	2.465	0.709729	low
GSM1855220	4.13699	0	7.90255	8.74595	2.68218	2.4288	10.2452	3.37472	high
GSM1855221	1.92055	0	5.84433	6.39111	2.65388	6.68945	6.72842	0.847443	low
GSM1855222	3.73425	0	6.11687	6.31054	2.58713	7.24915	6.85868	0.850901	low
GSM1855223	3.10959	1	6.66539	6.71379	3.50461	4.37695	1.72295	0.671923	low
GSM1855224	1.69315	1	7.51299	7.13599	9.17244	8.85592	9.64508	2.75052	high
GSM1855225	2.8411	1	7.88463	8.75964	2.55076	8.08401	3.39664	0.993589	high
GSM1855226	4.38082	0	6.04829	6.96061	6.00383	5.58905	9.68826	1.99531	high
GSM1855228	0.468493	1	6.3796	6.61495	3.4202	5.30207	10.2329	1.72155	high
GSM1855229	5.69041	0	5.2084	5.56811	3.057	9.75196	2.69904	0.350721	low
GSM1855230	4.52603	0	6.3796	7.09447	3.64166	5.79222	6.04283	1.08538	high
GSM1855231	1.33973	1	7.6743	7.1132	4.71895	4.45068	2.45	1.01084	high
GSM1855232	2.08767	1	7.73453	8.37507	8.10821	6.73212	10.544	3.99957	high
GSM1855234	4.63836	0	6.96614	6.81775	9.46863	6.33743	5.99141	1.83524	high
GSM1855235	1.95342	1	5.48388	7.08752	7.74519	8.3376	8.45762	1.57559	high
GSM1855236	4.52603	0	6.11582	6.45699	2.82116	7.8748	2.25683	0.480458	low
GSM1855237	0.49589	1	7.58206	7.61528	10.393	5.53578	10.1043	4.34897	high
GSM1855238	4.46301	1	7.80436	7.51999	3.3888	7.27274	5.42121	1.18473	high
TCGA-55-8615	1.22192	0	7.45458	5.82531	7.12709	6.56649	4.38806	1.11008	high
TCGA-97-8177	1.36712	0	6.34216	5.59141	2.98386	6.85516	4.65923	0.635593	low
TCGA-86-8674	2.20822	0	7.20202	5.71859	3.20425	5.93691	7.17202	1.09153	high
TCGA-91-A4BD	1.65205	0	5.65282	4.7546	2.26422	6.04842	2.85309	0.396271	low
TCGA-50-6590	3.52877	1	8.07818	8.23113	2.13519	7.53284	12.3831	2.89519	high
TCGA-50-5051	1.30959	1	7.4548	7.27671	2.83491	5.03643	3.24142	0.902216	low
TCGA-62-A471	3.4137	0	8.21052	6.88021	5.72046	3.12336	10.376	3.3863	high
TCGA-67-3773	1.16986	0	5.45041	5.32691	2.01058	7.4401	3.23945	0.394752	low
TCGA-91-6848	0.613699	0	9.15703	8.56466	2.50894	5.57722	5.64783	1.8045	high
TCGA-55-6986	8.93425	0	6.44539	5.81909	4.85698	5.41697	7.4336	1.22327	high
TCGA-86-6851	0.490411	0	6.44786	5.9923	4.66608	8.39165	4.25157	0.688944	low
TCGA-73-4677	0.10411	1	5.64067	5.24449	5.26512	7.57285	9.86212	1.2178	high
TCGA-78-7540	3.27945	1	5.84807	5.09401	3.796	11.6501	7.3827	0.611994	low
TCGA-44-6775	1.93151	0	5.97591	7.01239	4.14539	7.18617	3.09441	0.668508	low
TCGA-69-8253	1.16712	0	6.06881	5.42744	2.61193	6.54195	10.2799	1.18513	high
TCGA-NJ-A55R	1.65205	0	6.90677	6.28286	3.13678	4.77269	3.18132	0.738895	low
TCGA-53-A4EZ	2.93425	0	8.00959	6.39451	2.07282	3.84408	3.01201	0.837785	low
TCGA-55-6970	1.27123	1	6.56302	7.99107	3.259	6.90229	7.92047	1.46063	high
TCGA-86-8359	1.21644	1	6.56803	5.46356	3.66534	3.73984	5.97266	0.981347	high
TCGA-99-8032	0.120548	0	7.14626	6.57344	3.57152	4.70781	4.05279	0.932491	low
TCGA-50-7109	0.843836	1	7.2223	6.79865	3.05168	6.66925	3.84959	0.803932	low
TCGA-44-7667	3.00548	0	9.63179	9.00604	3.16591	5.22252	2.69658	1.55495	high
TCGA-NJ-A4YG	6.19452	0	5.77453	5.55623	3.81712	8.30171	7.02976	0.76807	low
TCGA-55-8302	1.30959	0	7.71403	6.05765	9.24163	8.10498	6.10764	1.6272	high
TCGA-64-1679	6.81644	0	6.73643	7.45177	6.94515	5.91639	7.39851	1.91034	high
TCGA-38-7271	2.19178	1	5.64393	5.35889	3.76025	6.63601	4.17835	0.564655	low
TCGA-50-6595	0.517808	1	8.25837	8.06113	5.87455	4.03388	12.1197	4.87228	high
TCGA-55-6968	3.54247	1	9.77468	7.79961	2.62421	8.19724	6.45279	1.67017	high
TCGA-44-8120	0.712329	0	5.99997	5.59701	5.4035	9.71106	3.73663	0.558691	low
TCGA-99-8025	2.90411	0	6.57031	6.37886	2.86465	5.99236	4.36549	0.747487	low
TCGA-50-6594	1.0137	1	7.19403	7.51515	10.5251	4.26257	2.59412	1.7296	high
TCGA-44-A479	1.33151	0	6.58441	6.34584	4.21217	4.9055	3.1058	0.768446	low
TCGA-86-8076	2.72055	0	5.95692	5.21523	2.67966	9.05189	4.42634	0.466324	low
TCGA-MP-A4TF	0.920548	1	7.65369	7.77928	7.79496	4.82955	13.1643	5.48036	high
TCGA-78-7161	0.79726	1	5.57637	5.03338	6.00311	2.93597	3.35667	0.738524	low
TCGA-38-4632	3.71781	1	8.33685	9.22332	2.07839	9.06479	5.03973	1.26518	high
TCGA-95-8039	2.27397	0	5.89197	6.31134	6.43544	6.5002	3.70877	0.819407	low
TCGA-86-8075	1.90137	1	7.2059	7.04354	5.10316	5.64898	3.88946	1.07119	high
TCGA-44-6147	2.31507	0	5.23456	5.66958	5.36767	6.63309	4.74433	0.689944	low
TCGA-44-6148	1.92877	0	5.07797	4.35159	2.42347	8.40281	2.77713	0.296127	low
TCGA-64-1677	1.72055	1	7.77427	6.25607	4.67134	5.33778	6.71401	1.44439	high
TCGA-NJ-A55O	0.0356164	0	7.00986	6.99499	2.10595	10.6948	3.56236	0.553124	low
TCGA-05-5420	1.25205	0	5.83353	7.66488	5.63884	10.156	2.95798	0.674759	low
TCGA-97-8174	0.449315	1	6.03903	5.25319	2.88126	6.76388	14.0083	1.84987	high
TCGA-55-6971	3.83562	0	6.61296	6.80841	2.19019	7.0139	5.59607	0.828086	low
TCGA-55-8621	1.41096	0	5.84567	6.00927	6.43142	7.79574	3.91792	0.735022	low
TCGA-86-A456	2.45479	0	6.19722	5.93501	4.80765	9.42341	4.01359	0.605979	low
TCGA-55-7573	1.33425	0	5.70286	5.44404	2.55193	6.50803	3.2636	0.465909	low
TCGA-MP-A5C7	6.1589	0	5.29329	5.24917	2.04763	5.88335	2.59412	0.388591	low
TCGA-MP-A4TJ	0.928767	1	6.65584	5.9976	2.43945	9.90034	4.62129	0.555918	low
TCGA-64-5778	3.57534	0	7.40382	7.15634	5.6066	9.24631	3.74091	0.920655	low
TCGA-55-7726	1.7863	0	6.68026	7.82097	5.71782	3.02681	11.4851	3.58967	high
TCGA-L9-A8F4	1.30411	0	7.92008	7.20458	4.12753	9.50057	4.3906	0.938093	high
TCGA-91-6828	0.884932	0	6.61784	7.14357	2.26805	6.23203	2.66145	0.639158	low
TCGA-91-6849	0.0958904	0	5.248	4.78519	3.15691	10.569	7.61547	0.554663	low
TCGA-55-8510	1.47671	0	7.04842	6.3688	6.90345	10.7562	4.29933	0.846749	low
TCGA-44-A47B	0.786301	0	8.26873	5.70695	2.15148	6.74022	2.6298	0.627766	low
TCGA-99-7458	2.04658	0	5.36415	6.37682	7.69063	8.93801	4.0851	0.769372	low
TCGA-49-AAQV	1.85479	1	6.65562	7.18001	5.97495	5.10691	3.72307	1.10249	high
TCGA-99-8028	3.06301	0	6.18527	5.4121	3.22999	9.1335	4.60852	0.531876	low
TCGA-91-6847	2.30685	0	7.46991	8.35146	4.90117	2.91192	8.84717	2.95407	high
TCGA-MP-A4TA	2.60274	1	7.98345	8.16595	5.88717	3.74763	7.01075	2.55515	high
TCGA-49-AARN	3.10959	1	6.59975	6.11623	5.68446	5.19918	4.38517	0.976898	high
TCGA-50-5049	8.47671	0	7.16243	6.19827	2.34819	9.12009	3.21383	0.540525	low
TCGA-55-5899	2.54795	0	8.40841	7.95288	5.88269	6.62985	2.63739	1.27344	high
TCGA-MP-A4TC	0.20274	1	8.34421	7.18433	6.808	7.40796	7.59901	2.15622	high
TCGA-49-AARQ	18.4438	0	7.03841	5.4195	2.04325	4.43072	2.77473	0.581246	low
TCGA-05-4384	1.16712	0	5.3929	5.65549	6.51215	8.10704	6.01574	0.83489	low
TCGA-55-8203	1.49863	0	6.57339	6.9202	2.84777	7.5242	7.19792	1.05098	high
TCGA-50-6591	0.326027	1	9.02971	8.02605	2.15259	2.99291	2.59412	1.26623	high
TCGA-44-7670	2.41644	0	8.30715	7.13382	3.25459	5.22313	4.78286	1.24901	high
TCGA-05-5425	2.41644	0	7.60369	7.46418	2.96772	7.46893	5.61271	1.11045	high
TCGA-49-AARR	13.6767	0	6.07574	4.69157	2.86378	7.90381	5.62249	0.555639	low
TCGA-86-7711	2.86575	1	7.66496	6.602	7.48683	3.26566	2.64914	1.31874	high
TCGA-97-8552	1.71507	0	5.89241	4.94878	2.64613	6.16633	4.10999	0.508804	low
TCGA-50-8459	3.06575	0	5.91085	5.55829	2.95126	9.75981	10.3698	1.00643	high
TCGA-93-A4JN	1.96712	0	7.13086	7.01288	2.2388	5.49229	2.84239	0.723259	low
TCGA-95-A4VP	1.65753	0	8.05947	6.5355	2.1441	3.71582	2.8923	0.862111	low
TCGA-86-A4P7	1.13699	0	6.67076	5.65535	2.24614	7.63805	2.87612	0.481138	low
TCGA-50-5045	5.95616	1	6.86291	6.60834	6.58766	11.6882	6.21554	0.995761	high
TCGA-69-8453	2.2274	0	7.22057	6.19415	2.74411	12.0373	7.78193	0.832973	low
TCGA-05-4396	0.830137	1	5.75438	7.20549	5.99466	6.23971	4.50865	0.994663	high
TCGA-55-6975	0.323288	1	7.22851	7.73332	8.73257	4.28268	9.27455	3.52959	high
TCGA-78-7150	1.82466	1	7.92662	8.26835	4.39722	3.51804	4.92194	1.76021	high
TCGA-49-4512	2.47945	1	6.93192	6.00152	3.22381	7.27592	3.20519	0.613914	low
TCGA-55-8206	2.43288	0	5.5544	5.39744	2.21184	8.6998	3.13026	0.376272	low
TCGA-05-4417	1.24658	0	6.60669	6.16418	5.62516	5.61677	2.7782	0.780841	low
TCGA-55-A491	1.71507	0	6.31119	5.54862	4.7469	5.81849	3.23543	0.656753	low
TCGA-55-8513	2.16712	0	5.5407	5.19007	2.2089	12.9572	7.81089	0.500363	low
TCGA-55-8614	1.46849	0	8.49732	5.53708	2.4454	4.49972	12.5295	2.57937	high
TCGA-78-8655	6.46575	0	6.22498	5.77884	6.76928	7.12249	5.53392	0.988416	high
TCGA-97-7554	2.12329	0	6.11265	5.8587	3.09677	6.77019	2.89064	0.520704	low
TCGA-50-6673	0.060274	1	6.40491	6.91395	2.75439	8.85653	6.70605	0.878217	low
TCGA-44-7662	0.59726	0	7.55523	7.47799	5.7964	7.48909	4.45435	1.22844	high
TCGA-97-8547	1.8	0	5.81614	6.22646	7.24449	4.26989	4.31145	1.06544	high
TCGA-55-7995	2.43562	0	7.20066	7.00786	4.21084	8.20774	3.30259	0.77836	low
TCGA-55-8207	2.67671	0	5.53009	4.93526	4.18122	9.29083	4.83615	0.49654	low
TCGA-73-4658	4.38356	1	6.70238	6.18627	6.65039	7.75965	4.05623	0.893839	low
TCGA-97-7941	1.32603	0	5.88881	5.20456	3.09952	10.1203	3.78504	0.412967	low
TCGA-55-7910	2.84932	0	6.92887	7.07508	3.84857	3.25409	2.7338	0.927839	low
TCGA-78-7166	0.706849	1	6.96349	6.63475	4.03831	5.05211	7.60815	1.45765	high
TCGA-78-7152	3.32877	1	6.38786	5.80831	2.66064	9.73705	7.52011	0.767877	low
TCGA-49-4506	2.73699	1	4.39733	7.86182	2.63955	5.01406	11.0346	1.62339	high
TCGA-49-4514	4.65753	0	6.22403	6.07099	2.52796	4.03902	3.70111	0.682738	low
TCGA-NJ-A55A	0.0410959	0	5.73059	5.63998	2.94504	5.79044	3.59353	0.544322	low
TCGA-55-7727	0.326027	0	4.57754	7.82448	5.51917	5.26084	2.89779	0.763032	low
TCGA-55-8508	1.69041	0	6.99105	6.00509	3.47548	3.56295	7.97082	1.45123	high
TCGA-49-4487	2.34247	1	7.87942	8.0849	2.18792	8.73909	3.21392	0.812842	low
TCGA-78-7160	1.90959	1	6.98583	7.12326	5.33817	5.95339	7.62222	1.67648	high
TCGA-97-A4M1	1.64658	0	5.55423	5.14757	2.63354	5.9698	2.68702	0.421898	low
TCGA-86-8672	0.0520548	1	5.24665	7.34661	6.09204	6.59134	13.1164	2.72704	high
TCGA-91-7771	1.34795	0	5.27591	6.12825	2.5287	9.40993	4.29645	0.459641	low
TCGA-62-A46R	4.72603	1	5.79021	6.69011	6.45276	9.28553	2.83034	0.644803	low
TCGA-75-6206	7.09589	0	5.70738	4.61152	3.50647	9.49536	3.7771	0.395104	low
TCGA-86-8671	2.29863	0	6.53534	5.66651	2.15381	9.36884	3.74387	0.468481	low
TCGA-55-6972	4.47123	1	5.83516	6.93802	5.37547	3.64958	3.26645	0.920403	low
TCGA-64-1681	3.19726	1	6.53026	5.6778	3.68158	7.50828	3.56141	0.590106	low
TCGA-97-A4M7	1.72329	0	5.90966	5.63094	2.11631	8.11691	6.23647	0.624132	low
TCGA-95-7043	1.37808	1	8.34467	5.84846	2.01058	3.98635	4.28706	0.936719	high
TCGA-64-5775	0.169863	1	8.43959	8.68735	4.40809	4.39253	5.86989	2.16446	high
TCGA-50-5946	4.43014	0	7.32778	7.72262	3.51354	4.71953	4.68052	1.22988	high
TCGA-55-7913	1.53699	1	7.61713	7.5899	4.63929	5.09048	3.65476	1.19611	high
TCGA-44-6779	1.36986	1	5.98742	8.13761	5.5507	4.72584	12.4427	3.38997	high
TCGA-97-8172	1.49315	0	5.65326	4.98648	2.32582	8.96247	3.66068	0.380735	low
TCGA-44-7661	1.52603	1	8.16044	8.28383	8.10611	4.02597	10.5008	4.9535	high
TCGA-50-5055	5.0137	1	6.6192	6.07007	3.65201	5.09504	4.8076	0.861143	low
TCGA-38-4628	4.08767	1	7.60357	6.7032	4.64531	6.05159	3.49752	0.962112	high
TCGA-86-7713	3.16986	0	7.31026	7.62477	3.92742	3.32769	3.21905	1.13924	high
TCGA-44-2662	3.50685	0	6.71816	8.39942	8.21658	4.31964	3.53571	1.68266	high
TCGA-67-6216	0.386301	0	5.7331	6.07873	4.7564	5.12121	4.99243	0.850531	low
TCGA-55-7283	1.66849	0	6.0042	6.93173	4.41068	7.22629	3.02016	0.671006	low
TCGA-73-4659	1.94795	1	7.79413	7.72538	2.84938	5.96331	6.92045	1.52332	high
TCGA-86-8073	2.0274	0	6.32304	5.79484	3.73783	7.69154	3.52444	0.575916	low
TCGA-49-AARE	3.36712	1	7.84601	6.36786	3.42791	5.95801	6.28291	1.21175	high
TCGA-MN-A4N4	3.21918	0	6.35241	4.77972	6.81799	6.09695	11.0052	1.83454	high
TCGA-55-8091	1.64384	0	6.40029	6.13547	5.62767	6.07704	4.50459	0.908873	low
TCGA-05-4415	0.249315	1	9.28756	9.05741	3.4257	3.63605	5.6101	2.42119	high
TCGA-75-5147	3.65205	0	6.63971	8.9065	6.15523	6.08387	3.65129	1.35903	high
TCGA-78-7154	1.62466	1	7.28863	7.98671	3.03172	3.7186	7.14436	1.76733	high
TCGA-05-4418	0.750685	1	7.23747	7.19778	8.34326	7.59416	8.05653	2.19446	high
TCGA-55-1595	4.05205	0	6.17396	7.05804	5.47538	6.60258	7.4351	1.39425	high
TCGA-99-AA5R	1.80274	0	5.69066	4.9563	2.98545	9.87857	3.12116	0.356796	low
TCGA-95-A4VK	1.78356	0	5.43871	7.10422	4.71901	8.2839	8.89676	1.26961	high
TCGA-97-8175	1.50959	0	6.16243	6.23271	8.66842	5.01051	7.01774	1.70893	high
TCGA-50-5941	4.03836	0	6.74424	6.82935	4.67521	8.79668	8.00086	1.27815	high
TCGA-44-2657	3.70137	0	6.02909	6.19221	3.36194	9.16577	5.16057	0.633756	low
TCGA-44-A4SS	1.13699	0	7.07067	6.51485	4.60604	6.45831	8.49914	1.56629	high
TCGA-05-4250	0.331507	1	7.83574	8.22791	8.70692	7.62766	11.9582	4.72625	high
TCGA-50-5044	1.70959	1	7.98598	6.95461	2.24637	3.84252	10.9088	2.48196	high
TCGA-64-1676	4.73425	0	6.57502	7.18246	4.23571	7.4329	2.66145	0.706342	low
TCGA-64-5774	7.33151	0	8.25436	7.82092	4.32556	3.489	3.49894	1.43832	high
TCGA-78-7220	2.21096	1	7.39626	7.19828	5.70788	3.99282	5.86098	1.69124	high
TCGA-44-2665	3.56438	0	5.23838	6.52681	6.4138	7.53978	7.60588	1.1687	high
TCGA-J2-A4AD	1.50685	1	6.28557	6.9597	9.69926	7.29356	3.93535	1.25843	high
TCGA-55-6981	3.77808	1	7.05096	6.59327	8.76055	6.88871	4.36676	1.32918	high
TCGA-62-A46P	1.6274	1	7.3121	5.39286	2.01058	5.6229	2.72026	0.554514	low
TCGA-86-7955	2.93699	0	7.69624	7.4796	6.6343	3.42829	4.78825	1.81807	high
TCGA-67-3771	1.67123	0	7.03275	6.58786	2.12397	7.10085	7.63829	1.08863	high
TCGA-38-4625	8.14521	0	7.70521	7.67187	2.14151	6.96523	4.35342	0.953418	high
TCGA-86-8054	3.14521	0	8.6539	8.60413	5.71644	5.62271	4.17598	1.85817	high
TCGA-55-8089	1.92329	1	6.67625	8.02625	2.50194	9.17618	12.4648	2.13846	high
TCGA-67-6217	1.15616	0	5.81404	5.01316	3.45468	8.19064	2.67184	0.401719	low
TCGA-97-8179	1.19178	0	5.84402	6.47724	8.37365	4.50419	6.73802	1.64182	high
TCGA-38-4629	2.36712	1	7.86476	7.60719	6.35072	7.88735	8.40926	2.20699	high
TCGA-50-5939	1.26027	1	6.72653	6.62802	2.25652	5.35866	11.1715	1.83613	high
TCGA-55-A48Y	1.72603	0	5.78237	5.77047	3.83521	4.52297	6.69001	0.966298	high
TCGA-97-8176	1.28219	1	7.10253	7.607	7.55049	4.16686	8.23136	2.7021	high
TCGA-50-5931	1.18904	1	9.47982	7.90875	8.37356	4.94873	9.519	4.87859	high
TCGA-49-6744	4.61096	0	6.08706	6.33867	4.64549	8.57167	8.39369	1.14031	high
TCGA-50-5072	0.684932	1	8.10855	9.15944	8.9335	6.06886	6.90793	3.39925	high
TCGA-MP-A4SW	4.87123	1	6.52315	6.81163	5.49292	8.6166	3.29424	0.744344	low
TCGA-78-7162	8.68219	1	5.31156	5.46679	2.9893	7.74061	2.9317	0.40701	low
TCGA-55-A48Z	1.78356	0	6.75936	6.79685	4.70685	7.49175	4.78637	0.927755	low
TCGA-78-8662	9.20822	1	8.19016	6.10056	6.18623	7.40574	2.94331	0.942366	high
TCGA-MN-A4N5	0.230137	0	6.84552	6.77421	6.07195	6.63524	5.36337	1.19969	high
TCGA-78-8640	19.3479	0	7.7155	6.84178	5.49052	8.92585	2.80276	0.825562	low
TCGA-95-7562	0.238356	1	7.38047	7.42939	4.58319	4.15947	5.4124	1.47958	high
TCGA-73-4676	0.769863	1	8.48917	7.80597	7.66365	7.97571	7.66748	2.54787	high
TCGA-55-1596	5.65753	0	7.23962	8.14367	7.93701	5.1386	2.63831	1.44964	high
TCGA-64-1680	3.08493	0	5.66972	6.54617	2.678	5.27201	8.25477	1.12043	high
TCGA-97-7552	5.29315	0	5.3116	5.59727	2.04908	9.62632	5.63043	0.47566	low
TCGA-69-7763	1.89041	0	6.20075	5.54835	3.35609	7.4384	11.2138	1.39866	high
TCGA-73-4670	0.358904	0	6.8705	7.75003	3.65705	5.14643	11.7887	2.76606	high
TCGA-50-5944	4.79452	0	5.65655	5.54133	4.9564	8.02544	2.63871	0.489504	low
TCGA-75-5146	6.48767	0	6.13902	5.41343	2.45966	6.03445	4.8757	0.619037	low
TCGA-97-7546	3.52055	0	5.43549	5.83346	2.23972	6.10374	3.27063	0.474307	low
TCGA-55-7911	1.47123	0	6.55691	8.05387	7.80147	4.62057	10.133	3.36128	high
TCGA-55-8511	1.51233	0	7.34681	6.62359	8.66048	8.04739	5.63909	1.5093	high
TCGA-44-5644	2.36438	0	6.88678	6.42414	3.253	3.82251	4.47309	0.948861	high
TCGA-55-8512	1.66301	1	5.96935	4.71253	2.3242	5.71909	9.12604	0.928967	low
TCGA-75-5125	5.55342	1	8.2318	8.49667	8.47129	7.50593	4.36425	1.99547	high
TCGA-38-4626	10.0658	0	6.09302	5.73132	2.29305	7.27972	7.13944	0.780992	low
TCGA-49-6742	1.33699	1	6.26495	7.73329	3.16288	5.30466	4.43436	0.950725	high
TCGA-75-6212	4.15342	1	5.08113	5.82798	3.14691	6.65516	3.04096	0.457256	low
TCGA-44-8119	0.780822	0	7.6267	6.82071	3.38702	3.40485	2.67842	0.935909	low
TCGA-38-4631	0.969863	1	8.67362	7.16255	8.41794	2.89557	4.13568	2.24189	high
TCGA-38-A44F	0.364384	0	5.7903	5.12352	2.7128	7.72284	7.94931	0.759312	low
TCGA-L4-A4E6	1.19178	0	5.72672	4.77119	4.13746	10.7186	3.00928	0.361537	low
TCGA-86-8279	2.6	0	6.65254	7.00312	2.36497	5.11456	3.56087	0.761153	low
TCGA-55-7724	1.93151	0	4.66356	6.46699	4.52745	7.07428	13.5601	1.94568	high
TCGA-73-4662	6.89041	0	5.865	5.99078	5.19996	8.01012	2.74219	0.560947	low
TCGA-73-A9RS	0.931507	1	8.98081	7.31203	8.86705	3.86693	3.94437	2.29804	high
TCGA-L9-A5IP	0.158904	1	7.80922	6.99198	6.72936	3.64149	14.5924	5.82074	high
TCGA-J2-8194	1.98356	0	5.78847	5.3363	2.60324	3.19651	7.46337	0.970106	high
TCGA-NJ-A4YI	0.0109589	1	6.66439	5.17409	2.38764	5.38667	3.57231	0.56775	low
TCGA-55-8299	1.28493	1	6.47934	7.76856	6.213	6.66178	11.4874	2.87708	high
TCGA-78-7149	10.7945	0	5.23934	4.976	5.36366	5.59638	5.82293	0.757513	low
TCGA-55-6987	5.85479	0	6.68497	6.46929	3.61226	7.81436	5.11174	0.807567	low
TCGA-55-6980	5.77808	0	6.35786	5.03559	8.98732	6.79948	7.1425	1.36802	high
TCGA-91-6835	0.216438	0	6.9955	7.23884	5.47854	10.554	3.21775	0.748066	low
TCGA-86-8585	0.967123	0	8.60079	6.56559	3.29389	8.96901	11.0203	2.0725	high
TCGA-62-8398	1.21644	1	7.40143	7.49472	7.51244	5.00808	8.27273	2.64067	high
TCGA-MP-A4T4	7.16986	1	7.38778	6.69218	8.18906	8.51205	7.26565	1.75196	high
TCGA-93-A4JP	1.58356	0	5.63542	6.58463	5.34733	4.42263	5.83344	1.10828	high
TCGA-S2-AA1A	1.40548	0	5.3954	4.63793	2.01058	10.1445	2.68176	0.277287	low
TCGA-50-5066	3.95068	0	7.2447	7.71947	4.2627	7.4161	6.59591	1.3933	high
TCGA-05-4398	3.92055	0	7.26022	7.55253	2.7238	7.40155	5.92585	1.09214	high
TCGA-97-A4M6	1.55616	0	5.73209	5.8951	6.99103	9.22876	6.06321	0.892349	low
TCGA-75-6214	3.05479	1	7.67154	7.62863	4.42241	4.05387	13.4092	4.30157	high
TCGA-L4-A4E5	1.58356	0	7.65593	8.03325	5.18518	6.93805	3.3193	1.15525	high
TCGA-55-A48X	1.88767	0	6	6.5929	5.84438	4.57241	6.07235	1.25103	high
TCGA-44-6774	1.80274	0	6.48495	6.08368	5.77794	6.20612	3.08739	0.768977	low
TCGA-05-5423	0.413699	0	5.7852	7.40414	6.11401	7.78899	2.63858	0.748017	low
TCGA-05-4382	1.66301	0	6.5044	5.91871	4.87923	8.63863	4.87723	0.745614	low
TCGA-97-A4M2	1.70959	0	5.3541	4.70226	2.25606	10.7166	4.64295	0.350786	low
TCGA-44-6777	2.70411	1	5.8718	6.09728	6.67278	7.83272	5.28839	0.905099	low
TCGA-86-8055	0.339726	1	6.69693	8.79177	7.56203	8.8575	7.49907	2.07742	high
TCGA-55-A4DF	1.20548	1	7.68956	7.45502	2.15075	9.25077	5.13754	0.880331	low
TCGA-55-8096	1.96986	1	5.41431	5.78124	6.00788	7.85418	5.06832	0.736705	low
TCGA-50-5930	0.772603	1	7.05335	6.12223	3.59164	6.90789	8.84183	1.36336	high
TCGA-67-3774	1.05479	0	6.32862	5.63998	3.42772	7.99002	8.32118	0.979167	high
TCGA-05-4426	2.16712	0	6.4191	6.51903	3.49459	4.01305	3.89556	0.842743	low
TCGA-95-A4VN	1.51507	0	7.22698	7.35396	6.87223	3.71297	6.0858	1.96082	high
TCGA-97-8171	1.55616	0	5.75784	6.49434	2.05791	4.05833	2.71212	0.574799	low
TCGA-05-4430	2.08493	0	6.95625	5.85783	3.50833	5.62496	3.1359	0.679525	low
TCGA-49-AAR0	13.0548	0	7.85015	6.70211	2.97404	10.832	4.42144	0.715996	low
TCGA-55-A57B	1.49589	0	5.98171	6.01563	6.86749	7.6894	6.26651	1.05444	high
TCGA-L9-A443	0.528767	1	6.56133	5.26709	4.49066	5.59195	3.26511	0.649869	low
TCGA-95-7567	1.55616	0	7.30494	7.12895	3.1634	7.27119	5.79769	1.06297	high
TCGA-44-3396	3.09589	0	6.93379	6.72068	7.73387	7.81883	5.06423	1.25102	high
TCGA-05-4420	2.49863	0	7.86851	7.34862	3.91583	3.13646	3.84773	1.29915	high
TCGA-69-7974	0.50411	0	7.58819	7.18546	5.08318	8.75775	5.84506	1.2174	high
TCGA-67-4679	1.2274	0	5.27746	5.09134	2.11	7.90588	2.63127	0.336828	low
TCGA-55-8506	0.030137	0	7.72232	4.37282	2.27804	4.19791	4.29344	0.687366	low
TCGA-44-7672	1.96986	0	6.63642	6.75735	7.02228	9.17856	7.10532	1.33848	high
TCGA-NJ-A4YP	0.136986	0	6.3935	6.50986	3.20482	4.12193	10.7981	1.9241	high
TCGA-O1-A52J	4.92603	1	6.28691	6.35248	3.1894	10.2348	2.59412	0.451207	low
TCGA-44-2656	3.91507	0	5.14334	6.62599	8.79467	6.87762	2.74913	0.821235	low
TCGA-53-7813	1.16164	0	5.69734	6.31862	2.12272	4.92049	3.23105	0.563761	low
TCGA-62-8402	4.10411	1	6.846	5.986	2.01058	7.68265	4.1892	0.598201	low
TCGA-78-7633	4.1863	1	6.09632	5.89856	6.72469	4.74905	3.09016	0.840387	low
TCGA-35-4122	0.616438	0	8.15434	7.64046	7.55769	9.59906	5.4154	1.59448	high
TCGA-05-4422	1	0	6.69474	6.97714	2.96455	7.93771	2.73775	0.608596	low
TCGA-78-7535	2.6	1	6.14456	6.31954	2.15626	2.83704	3.14224	0.681612	low
TCGA-86-8358	1.78904	0	10.0922	8.75064	2.30307	4.15152	5.80616	2.34116	high
TCGA-MP-A4T7	0.457534	1	7.54698	7.20038	4.59686	7.17739	6.974	1.47621	high
TCGA-86-8056	0.380822	0	5.99364	5.12466	2.61577	8.20363	2.90151	0.400652	low
TCGA-55-6642	6.70959	0	5.28499	6.24401	2.6785	4.8415	3.24899	0.554286	low
TCGA-49-AAR9	0.712329	1	9.69247	7.64704	7.93379	2.81273	8.21203	4.51567	high
TCGA-86-8074	0.0657534	0	6.92164	7.38428	4.16559	4.96692	5.3003	1.23837	high
TCGA-75-7027	8.38082	0	7.78826	7.73842	6.47215	4.2808	10.0393	3.45765	high
TCGA-50-8460	2.27123	0	5.94704	5.64548	2.7084	7.37998	5.98055	0.672591	low
TCGA-L9-A444	0.841096	0	6.40103	5.43053	2.74125	7.49434	2.59412	0.45429	low
TCGA-91-8497	1.18904	1	5.73322	4.73043	2.87291	9.84106	3.64983	0.367704	low
TCGA-05-4249	4.1726	0	5.93977	5.71867	2.30318	6.84636	3.28633	0.483711	low
TCGA-44-7669	1.5726	1	8.66339	8.54973	3.44329	10.1129	4.17084	1.137	high
TCGA-71-6725	0.70137	0	6.28436	5.52165	3.85191	3.41577	2.96238	0.675454	low
TCGA-55-8092	0.421918	1	5.94052	6.66075	2.05607	3.58755	6.23843	0.970295	high
TCGA-73-4666	2.19178	0	6.85621	8.70382	8.19132	8.84389	6.28544	1.90943	high
TCGA-49-6761	0.969863	0	7.50196	6.11638	7.07754	4.81827	6.35156	1.66015	high
TCGA-78-7159	5.40822	0	6.39307	6.85512	2.86516	3.87982	2.65478	0.721551	low
TCGA-55-8090	1.63836	1	6.88907	6.74197	8.69907	5.93825	9.32865	2.60563	high
TCGA-55-7227	2.60822	1	6.10161	6.87135	4.56058	9.23843	6.19351	0.896672	low
TCGA-78-7145	2.26301	1	7.42485	8.44279	7.99429	6.37694	4.18175	1.76125	high
TCGA-78-7158	0.490411	1	6.18528	6.51203	2.0541	5.59314	2.65727	0.554496	low
TCGA-55-6978	0.482192	1	9.32105	7.3525	6.43025	6.85412	7.61589	2.57208	high
TCGA-49-AARO	10.2986	0	6.7001	6.17638	7.50235	7.55158	3.4848	0.907954	low
TCGA-86-A4D0	0.317808	1	8.13321	8.30214	4.80758	5.23909	2.59412	1.27071	high
TCGA-NJ-A4YQ	3.92329	0	6.76465	6.94676	8.26019	8.82718	2.74157	0.929179	low
TCGA-86-7714	1.71233	1	4.46284	5.8547	5.00477	5.68271	3.4915	0.554992	low
TCGA-91-8499	0.0986301	0	9.01594	9.29045	3.53019	8.24163	3.16932	1.3432	high
TCGA-86-7953	2.73151	0	8.15473	8.55077	7.30125	3.54305	2.67468	1.85834	high
TCGA-55-7816	1.28219	1	5.19248	5.58608	2.05014	3.65224	5.16147	0.639108	low
TCGA-55-6983	7.73425	0	6.59654	5.17846	2.53797	8.04335	6.24788	0.674563	low
TCGA-53-7624	2.85753	1	9.27192	8.37299	4.1124	5.47043	8.76668	3.05878	high
TCGA-L9-A7SV	1.54795	0	6.63626	5.87895	2.67608	4.96932	2.67028	0.592804	low
TCGA-55-8620	1.0274	1	9.12059	7.37322	2.06513	8.12189	3.011	0.880635	low
TCGA-69-8255	0.353425	0	7.25002	7.59512	3.03902	6.577	3.40606	0.867298	low
TCGA-62-A46Y	1.13425	1	6.42059	7.07339	5.18041	4.8332	5.52706	1.2431	high
TCGA-97-A4M3	1.47945	0	6.14829	4.93596	2.09857	5.2793	3.78234	0.50997	low
TCGA-49-AAR3	5.1863	0	7.32222	6.92177	5.80995	7.42807	8.78999	1.88214	high
TCGA-50-5068	4.10685	1	6.6671	7.50413	2.43945	6.56458	2.72562	0.682371	low
TCGA-NJ-A4YF	5.92055	0	7.91966	7.13734	4.70064	3.85098	2.67971	1.12315	high
TCGA-78-7163	19.8575	0	6.11295	4.87752	4.95897	3.92398	2.90042	0.632478	low
TCGA-78-8648	3.31233	1	6.38457	5.64148	4.83548	10.4392	4.09479	0.566273	low
TCGA-55-6979	0.649315	1	6.43449	7.35813	7.91929	7.50311	6.14115	1.51843	high
TCGA-80-5608	7.7589	0	7.57738	6.48789	2.9292	8.08437	5.96995	0.954431	high
TCGA-62-8395	3.33151	0	5.49077	5.47161	5.34823	7.48343	6.28553	0.798475	low
TCGA-35-5375	0.723288	0	7.81073	7.25801	2.64937	5.16205	7.76473	1.63131	high
TCGA-44-6778	5.10685	0	7.51559	7.10761	2.23072	11.5845	3.9646	0.610964	low
TCGA-MP-A4T6	4.90411	1	6.09783	4.59012	4.33069	10.0999	2.6761	0.3772	low
TCGA-55-8085	2.47671	0	6.40369	7.12186	3.06404	5.86478	2.93512	0.701136	low
TCGA-97-7547	5.38356	0	5.47945	4.76281	2.69143	8.12631	3.05873	0.361793	low
TCGA-44-6145	1.63014	0	6.85354	6.67161	2.31803	5.64501	11.487	1.93593	high
TCGA-49-4486	6.35068	1	4.6681	5.5941	5.56737	5.91825	8.90632	1.12178	high
TCGA-05-5429	0.753425	1	6.77255	7.9057	2.01058	3.613	4.21882	1.02906	high
TCGA-86-A4P8	2.20548	0	5.61832	4.56601	2.05607	9.64447	2.8126	0.298669	low
TCGA-91-8496	1.38356	0	5.56136	5.70077	2.31987	6.07405	2.75357	0.447987	low
TCGA-55-7281	2.38904	0	6.02565	5.7841	4.02016	7.45137	4.43082	0.640992	low
TCGA-05-4424	2.50137	0	6.7096	7.5179	2.63801	8.52579	5.15002	0.839194	low
TCGA-67-3772	1.56986	0	5.44391	6.0574	4.06701	7.63102	4.39064	0.604969	low
TCGA-78-7537	4.44384	1	5.79487	4.65771	2.09064	6.36915	7.87127	0.721148	low
TCGA-55-7994	1.65205	0	7.29283	8.67826	7.5847	8.77096	12.0385	3.97054	high
TCGA-69-A59K	1.61918	0	7.32304	7.36217	8.82563	6.6886	3.28459	1.3866	high
TCGA-75-7025	9.05479	0	5.26678	4.84403	2.59202	4.5914	4.59804	0.53179	low
TCGA-55-8514	1.42466	0	6.32633	4.44793	2.28795	9.96036	3.14234	0.340429	low
TCGA-44-4112	2.2137	1	6.57108	6.26696	2.97869	4.89319	6.77498	1.07487	high
TCGA-55-8094	1.48219	0	7.2763	7.54164	7.35814	3.75283	2.71538	1.38945	high
TCGA-05-4425	1.83288	0	6.52738	6.88829	2.19269	5.81757	6.49643	0.998414	high
TCGA-55-7914	0.512329	1	6.17021	5.83072	2.01058	4.71568	2.97395	0.545436	low
TCGA-49-4490	1.05479	1	6.0614	6.16544	7.48057	6.36741	7.14616	1.39864	high
TCGA-35-4123	0.49863	0	8.13276	7.59684	7.31344	6.89568	5.1851	1.77724	high
TCGA-55-1594	3.2274	0	7.04941	7.44876	3.11774	5.81907	3.32179	0.859606	low
TCGA-44-8117	1.05479	0	6.82355	6.05587	8.06941	6.28767	3.19056	0.996364	high
TCGA-05-4397	2.00274	1	8.96562	9.76201	2.23753	3.52955	3.24687	1.73169	high
TCGA-44-3918	2.83836	0	5.70307	6.48442	3.64684	6.17069	3.57884	0.640523	low
TCGA-95-8494	0.230137	0	8.58728	8.67394	8.9202	3.58873	3.86082	2.70167	high
TCGA-MP-A4T9	3.46575	1	6.52409	6.50854	8.66132	7.2496	6.26801	1.48947	high
TCGA-MP-A4SV	7.17808	1	7.71176	6.81343	5.38117	9.3355	5.80005	1.15368	high
TCGA-93-A4JQ	1.4411	0	7.28518	6.98844	7.45901	7.53653	7.52353	1.85703	high
TCGA-44-3917	3.2411	0	5.65086	7.08776	5.13376	3.30569	2.92822	0.878017	low
TCGA-05-4402	0.668493	1	6.14861	6.58118	8.46557	7.10149	8.37175	1.83656	high
TCGA-62-8394	0.380822	1	7.24552	7.33234	7.44396	5.75518	5.74854	1.74006	high
TCGA-55-8204	1.41096	0	6.52044	6.06104	3.77424	3.22746	13.1509	2.73365	high
TCGA-MN-A4N1	2.26575	0	8.04381	6.0045	6.77871	8.5306	7.84194	1.6472	high
TCGA-50-5942	5.06027	0	4.85933	4.56248	2.52963	5.32816	2.7145	0.359305	low
TCGA-49-AAR4	2.40822	1	7.53853	6.20637	7.67865	7.85222	2.93416	0.963324	high
TCGA-55-8619	1.13973	0	5.89625	5.48423	2.20619	5.79364	4.72024	0.587231	low
TCGA-69-7761	0.509589	0	6.02678	7.1763	2.1337	9.07253	4.96007	0.647997	low
TCGA-73-7499	4.19452	1	7.45798	8.17752	4.04098	8.99646	3.90131	0.978854	high
TCGA-55-7903	1.55342	0	7.49458	7.22415	4.95897	6.16162	4.76917	1.22783	high
TCGA-55-8208	1.84658	0	6.59141	5.77111	3.08372	9.18042	4.66766	0.592503	low
TCGA-78-8660	0.879452	1	8.58916	7.00639	6.45518	6.43886	8.41641	2.48269	high
TCGA-05-4427	2.16712	0	7.15439	6.85725	4.12615	7.40759	2.85036	0.744679	low
TCGA-62-A46U	5.66301	0	7.61161	7.39765	3.75035	11.611	3.19578	0.673095	low
TCGA-MP-A4TH	2.03014	0	5.84435	5.13697	2.2373	6.79389	3.54947	0.449403	low
TCGA-78-7156	2.67397	1	4.2929	5.26291	6.25684	5.79832	4.80652	0.646281	low
TCGA-44-A47A	1.27671	0	7.15891	6.8448	2.67708	8.87101	7.28124	1.03816	high
TCGA-78-7539	2.16712	0	6.21888	5.47705	3.00066	9.80594	2.7291	0.400956	low
TCGA-55-8205	1.6411	0	8.15328	8.79533	7.24533	7.62868	5.86172	2.21501	high
TCGA-99-8033	1.79726	1	6.8331	7.8522	3.32956	4.29194	11.6198	2.80275	high
TCGA-49-6743	4.4411	0	8.11273	7.26433	5.2332	6.70261	7.35842	1.85755	high
TCGA-55-1592	1.92055	1	5.83409	6.55907	4.28217	9.15109	3.07502	0.545001	low
TCGA-86-7701	2.59452	0	6.66867	7.49646	3.84228	3.74393	4.12694	1.09827	high
TCGA-95-7948	1.30411	0	6.86465	5.59823	8.94981	3.20187	3.5606	1.28401	high
TCGA-69-7979	1.11781	0	8.98445	5.42938	2.84637	4.03344	7.08863	1.47521	high
TCGA-L9-A743	1.81918	0	6.76334	6.60056	6.54087	9.21163	4.91026	0.967499	high
TCGA-L9-A50W	1.21096	1	6.36743	4.74409	3.64384	6.66668	2.64677	0.467284	low
TCGA-86-8278	2.5863	0	5.43609	5.82117	9.35828	6.49342	7.58869	1.49653	high
TCGA-55-7574	2.72603	1	6.59764	6.0533	2.38268	6.14373	7.93505	1.05874	high
TCGA-95-7944	1.03288	0	7.87387	6.60998	2.31868	5.53418	10.0141	1.87354	high
TCGA-73-7498	3.25753	0	5.47715	5.02012	4.71138	6.31749	2.97768	0.499446	low
TCGA-55-A494	1.31781	0	8.05254	6.61149	3.27629	4.386	2.62994	0.894528	low
TCGA-73-4675	2.52603	1	7.51336	5.97185	2.70914	7.70644	7.52637	1.06504	high
TCGA-05-4433	2	0	6.81817	6.94003	2.01058	10.6223	4.20331	0.575019	low
TCGA-73-4668	1.27945	0	7.08993	6.53265	3.69187	6.05262	3.41157	0.787998	low
TCGA-69-7980	1.12603	0	7.73709	5.81692	6.06948	9.76005	5.82543	1.032	high
TCGA-55-8097	1.30411	0	5.38145	5.11043	3.26799	8.51052	2.70406	0.369738	low
TCGA-05-4390	3.08493	0	7.98937	7.90383	4.10827	3.84676	5.42932	1.70908	high
TCGA-44-7659	1.89315	0	5.65637	5.00988	2.96415	9.94521	6.68574	0.555616	low
TCGA-55-A490	0.271233	1	7.64942	5.40313	6.46683	7.0469	6.55658	1.28559	high
TCGA-93-8067	0.509589	0	7.18906	6.68682	5.71434	4.38433	7.06199	1.71917	high
TCGA-86-8673	2.36164	0	8.33654	6.86177	5.71655	4.89772	5.31365	1.63447	high
TCGA-69-7765	0.452055	0	5.83165	5.93063	3.725	6.91099	4.33081	0.633483	low
TCGA-MP-A4TE	2.45479	1	7.69462	5.60876	2.6925	3.40466	2.61882	0.732103	low
TCGA-44-2659	3.74521	0	5.3859	5.53233	2.76075	6.39077	3.34034	0.466518	low
TCGA-44-A4SU	1.12055	1	5.75878	5.77689	6.97547	6.41216	4.1444	0.82422	low
TCGA-55-7907	0.939726	1	6.18018	6.10677	7.30419	8.59358	2.86201	0.707159	low
TCGA-44-6776	7.16712	0	5.90765	4.77998	5.66747	4.89423	4.76278	0.764445	low
TCGA-49-4494	2.96164	1	8.0689	7.02758	8.06905	7.01158	9.42507	2.91076	high
TCGA-05-4403	1.58356	0	6.01625	5.89038	2.30406	10.0408	9.10469	0.852001	low
TCGA-50-8457	3.08219	0	5.31509	4.39435	2.76771	7.06135	6.06424	0.522682	low
TCGA-91-6840	1.01918	0	7.35481	6.76021	4.76629	7.33336	2.76461	0.795759	low
TCGA-55-8507	1.14521	0	7.71815	5.64531	2.85129	4.64339	3.32805	0.757868	low
TCGA-55-6969	3.39452	0	8.11437	6.88563	3.07204	7.11794	2.65871	0.782357	low
TCGA-38-4627	3.14247	1	6.28535	5.89265	7.67455	5.78454	7.34238	1.50026	high
TCGA-62-A46O	3.98356	1	7.06074	8.35841	7.83922	4.48366	9.42867	3.52204	high
TCGA-86-8280	1.92055	0	6.29854	6.39815	5.67439	9.59287	5.38688	0.838743	low
TCGA-44-A47G	0.961644	0	6.8249	6.34452	5.57269	9.07137	4.21936	0.796788	low
TCGA-78-7536	0.668493	1	7.80028	9.1965	3.81275	4.296	2.95557	1.40828	high
TCGA-91-6831	0.849315	0	8.46426	7.98002	3.04648	3.54894	3.66914	1.38136	high
TCGA-55-7728	1.92877	0	6.21457	5.25803	2.09972	10.7071	5.644	0.486588	low
TCGA-67-6215	0.476712	0	6.44926	7.19011	2.44954	7.39996	7.70197	1.11383	high
TCGA-69-7973	0.630137	0	8.57283	8.14712	2.97926	5.39858	5.47365	1.59874	high
TCGA-86-6562	1.03014	1	6.15016	6.57264	7.59285	5.44806	4.84253	1.21031	high
TCGA-55-7815	2.11781	0	4.5635	7.14731	4.2515	6.44688	3.98071	0.651455	low
TCGA-44-5645	2.33425	0	5.23605	5.57416	2.79958	5.34562	2.6298	0.449916	low
TCGA-62-A46S	4.52877	1	6.40696	5.47584	2.21991	6.95025	2.64809	0.455263	low
TCGA-86-A4JF	2.01918	1	7.93262	6.45581	3.5901	5.39208	4.13421	0.999741	high
TCGA-05-5715	0.169863	0	6.57408	5.63622	5.07787	10.5145	4.95837	0.659719	low
TCGA-95-7947	1.30685	0	7.97269	7.59503	4.21392	5.15161	4.47131	1.34166	high
TCGA-50-6593	0.920548	1	7.18657	6.86021	6.6229	10.9539	4.42148	0.912094	low
TCGA-J2-A4AG	2.70685	0	7.22481	5.16857	4.05043	9.0275	3.53674	0.567697	low
TCGA-55-8087	1.26575	0	5.1118	4.82162	2.01058	7.87886	3.7115	0.358177	low
TCGA-97-A4LX	1.68219	0	6.4006	7.12375	8.00551	9.73166	2.84672	0.845939	low
TCGA-55-A493	0.0767123	0	8.85648	8.83766	8.56281	7.8973	6.33341	2.90851	high
TCGA-62-A472	2.49315	0	7.89465	8.04985	6.56051	4.54704	6.00492	2.20582	high
TCGA-80-5611	7.10959	0	8.36636	8.44604	2.1878	6.06809	3.27097	1.10077	high
TCGA-55-6985	3.37808	0	7.41413	6.68183	5.56227	6.33815	4.74733	1.16151	high
TCGA-J2-A4AE	2.95616	0	5.99552	6.11196	4.06109	7.15433	2.86718	0.564269	low
TCGA-62-A470	3.27123	1	6.48783	6.12051	2.36518	7.96811	2.79982	0.493013	low
TCGA-78-7542	0.879452	1	7.8951	8.59081	3.95391	4.84923	10.4488	3.25069	high
TCGA-55-6543	1.19178	0	5.72725	4.91038	3.60953	7.00524	7.05376	0.737272	low
TCGA-97-7938	0.0493151	1	5.08023	5.25892	3.69416	8.92814	5.6671	0.529927	low
TCGA-05-4432	2.08493	0	8.22099	6.83478	2.81524	8.5915	3.03631	0.737118	low
TCGA-93-7348	1.45479	0	5.59077	5.90004	3.32464	7.11035	6.09905	0.72284	low
TCGA-78-7147	1.60548	1	7.05181	7.31446	4.86422	7.98018	5.01621	1.06293	high
TCGA-78-7148	1.71507	1	7.04502	7.33676	8.29164	4.45195	6.21435	2.09539	high
TCGA-35-3615	0.0383562	0	5.63258	5.7212	3.85788	6.18403	8.65598	1.08285	high
TCGA-91-A4BC	0.120548	0	6.64433	6.6692	2.08318	3.63556	3.68194	0.784255	low
TCGA-44-7671	2.43562	0	5.83888	6.01187	4.98545	6.71205	11.3321	1.74681	high
TCGA-50-5932	3.38356	1	6.21016	6.83539	7.04144	6.59352	3.38401	0.939008	high
TCGA-38-6178	1.2274	0	6.76189	6.25935	5.5009	6.18001	4.81555	0.999233	high
TCGA-67-3770	1.67123	0	5.89819	6.9119	6.25899	10.1231	2.70127	0.622376	low
TCGA-93-7347	1.87123	0	6.26359	5.86282	2.29669	6.69816	3.15794	0.515515	low
TCGA-50-5936	0.70411	1	7.6278	7.29822	8.38415	5.31473	7.11109	2.43085	high
TCGA-55-6984	2.08219	1	6.8232	6.67505	2.06865	4.01865	6.65693	1.14086	high
TCGA-69-8254	1.12055	0	5.59956	5.78644	2.35127	6.81596	4.24083	0.526452	low
TCGA-55-6712	0.468493	1	6.00218	7.4647	7.87611	8.58747	7.20187	1.53702	high
TCGA-38-4630	2.93973	1	8.06378	7.93507	2.08717	4.77205	3.11453	1.02455	high
TCGA-4B-A93V	0.821918	1	7.38567	6.00141	3.76464	6.23965	2.61572	0.683784	low
TCGA-86-8668	1.1589	0	5.94024	5.6778	2.08717	6.1642	3.57747	0.510344	low
TCGA-MP-A4TI	1.17534	1	7.84605	7.89907	6.00276	9.1394	10.3547	2.63196	high
TCGA-44-2661	3.17534	0	5.41265	6.09883	2.13146	9.27624	2.88423	0.381007	low
TCGA-69-7978	0.367123	0	8.82663	6.96728	8.00314	11.1426	7.43332	1.93496	high
TCGA-05-4405	1.67123	0	6.49291	5.521	2.94374	6.30759	2.74059	0.52172	low
TCGA-55-8505	1.20548	0	7.45052	6.23356	6.26779	4.49256	8.96837	2.20926	high
TCGA-64-1678	3.25753	0	8.43588	9.28388	3.6628	3.59862	3.67014	1.77069	high
TCGA-MP-A4TK	1.59452	1	7.02303	6.74109	7.83832	7.053	6.8972	1.69399	high
TCGA-62-A46V	6.02466	0	6.08958	6.91985	3.99476	5.00157	5.12847	0.978105	high
TCGA-49-AAR2	6.09315	0	6.6197	5.25323	4.39859	4.25217	3.00523	0.683018	low
TCGA-78-7167	7.34521	1	5.15092	4.14062	5.24074	6.99917	4.67145	0.515653	low
TCGA-55-8616	0.131507	0	6.64063	5.03907	3.49372	5.3128	6.06296	0.838979	low
TCGA-55-7570	2.25753	0	8.30488	7.86418	8.14819	4.82397	5.05318	2.29264	high
TCGA-78-7146	0.473973	1	7.91854	8.49469	6.9257	5.70147	10.5663	4.03143	high
TCGA-97-7937	1.54521	0	6.15289	6.4238	3.02947	3.48954	4.46466	0.849183	low
TCGA-55-7576	1.83562	0	7.04593	7.066	6.43102	9.39577	2.9188	0.827598	low
TCGA-49-4501	3.89315	1	6.23187	6.01654	3.83518	5.8638	3.28913	0.6454	low
TCGA-86-7954	1.65753	0	6.929	7.06043	3.88207	7.35294	4.03287	0.845361	low
TCGA-44-2655	3.6274	0	5.00732	5.66612	4.68879	6.94657	2.80617	0.482584	low
TCGA-49-4505	1.1726	1	6.05514	5.18234	6.13673	6.09218	3.0989	0.653343	low
TCGA-55-7284	0.665753	1	5.45182	5.50118	2.66072	11.4476	7.76771	0.589399	low
TCGA-91-6836	1.14247	0	8.97074	8.60229	4.37777	3.56961	2.70696	1.63615	high
TCGA-44-6146	1.99452	0	4.95356	5.12303	2.31088	4.55068	3.39497	0.445351	low
TCGA-50-6597	3.47397	1	8.27108	5.25148	3.11713	5.14453	2.68048	0.709626	low
TCGA-50-6592	2.12877	1	7.32085	7.10654	2.29636	5.97856	4.25946	0.879051	low
TCGA-NJ-A7XG	1.69041	0	5.83909	5.45192	5.67773	3.73513	8.32459	1.40973	high
TCGA-MP-A4T8	0.441096	1	7.33909	6.76946	7.69938	5.08471	9.04347	2.6074	high
TCGA-69-7760	0.553425	0	5.72244	6.74286	8.04767	3.91505	4.53508	1.28467	high
TCGA-MP-A4SY	4.11233	1	6.13871	6.7038	8.85744	6.0399	10.7262	2.77638	high
TCGA-62-8397	3.53151	0	5.30442	5.02547	2.42839	4.49433	2.81365	0.436198	low
TCGA-49-6745	1.43014	0	7.03726	7.47427	9.68908	5.93754	5.83324	2.10391	high
TCGA-55-7725	1.21096	0	4.061	5.7829	2.01058	5.64388	3.16291	0.380495	low
TCGA-05-4389	3.75068	0	7.50601	6.9739	3.92835	7.01762	2.9466	0.814645	low
TCGA-55-8301	1.46301	0	6.90222	7.56399	2.65667	9.59538	3.8234	0.690502	low
TCGA-44-2668	2.08493	1	7.05824	7.83653	6.56897	4.74789	8.92849	2.68039	high
TCGA-78-7153	9.9589	0	6.50505	6.25314	2.23107	4.53468	2.7843	0.616694	low
TCGA-44-3398	3.1863	0	5.71775	6.33361	9.8002	5.57158	10.4793	2.67293	high
TCGA-50-5935	1.78904	1	5.6895	5.71554	6.80347	10.1847	2.68651	0.523674	low
TCGA-91-6829	3.44658	1	6.72632	7.48255	2.56367	4.45992	2.59412	0.778569	low
TCGA-64-5779	2.36712	0	6.95504	5.60922	5.02638	4.01777	2.72537	0.786471	low
TCGA-69-7764	1.13425	0	5.1679	6.17042	5.41955	6.40936	3.01151	0.605133	low
TCGA-83-5908	2.25753	0	9.17025	7.80493	7.97948	5.92455	8.02817	3.4538	high
TCGA-44-5643	2.77534	0	9.38426	7.20231	4.40537	5.64081	11.2061	3.58057	high
TCGA-55-6982	2.72603	1	6.62521	7.32075	6.19589	6.44649	4.82653	1.20756	high
TCGA-J2-8192	2.02466	0	5.25026	5.89564	8.57385	7.98554	9.04778	1.50048	high
TCGA-71-8520	0.575342	1	7.55711	6.83242	4.08233	4.89274	2.75162	0.907725	low
TCGA-97-7553	5.12329	0	5.93126	6.72947	2.56964	5.73073	3.42141	0.63027	low
TCGA-MP-A4TD	0.841096	1	6.19364	5.86299	4.21246	6.88325	6.01878	0.855634	low
TCGA-55-A492	1.63288	0	5.67193	4.53472	8.26788	6.39595	3.46863	0.693678	low
TCGA-93-A4JO	0.090411	1	6.68007	5.76617	2.26241	5.66322	7.63498	1.00716	high
TCGA-55-A4DG	1.66575	0	5.04114	5.38051	2.18601	5.96252	2.87177	0.398139	low
TCGA-05-5428	1.83562	0	7.10403	8.28045	2.44352	5.62935	2.95956	0.897012	low
TCGA-64-5781	4.27123	0	8.8229	6.97103	3.39643	4.60473	12.2664	3.53475	high
TCGA-49-4507	0.734247	1	8.24611	7.07957	4.5163	3.91046	12.3956	3.86427	high
TCGA-78-7143	13.5918	1	6.63612	7.95376	6.19148	7.9422	2.70127	0.930368	low
TCGA-91-6830	0.164384	0	5.92685	7.09088	8.01645	8.26675	9.638	2.01032	high
TCGA-97-A4M5	1.73699	0	6.27019	5.52404	4.44476	8.78398	6.74939	0.816065	low
TCGA-62-8399	7.3863	0	7.2153	6.3197	5.63243	4.4653	6.40607	1.48423	high
TCGA-44-3919	2.81096	1	6.39379	6.68562	7.68015	7.57532	3.2174	0.919865	low
TCGA-49-6767	1.85479	0	7.72322	8.07948	8.00703	7.55257	4.37652	1.66054	high
TCGA-50-5933	6.55616	1	6.79038	8.05802	7.43576	6.39908	8.34004	2.41102	high
TCGA-86-8669	2.56986	0	6.78953	6.33621	2.90021	9.08443	2.8449	0.524688	low
TCGA-44-7660	1.62192	0	7.4197	6.69376	7.27814	5.0486	7.04758	1.96183	high
TCGA-64-5815	2.3726	0	7.10292	7.35914	9.1653	7.50713	13.7068	4.83583	high
TCGA-95-7039	3.48493	0	7.11081	7.35584	5.39967	7.86488	5.33394	1.18651	high
TCGA-53-7626	2.54521	1	5.96259	5.84329	4.1608	8.18282	2.65688	0.496453	low
TCGA-49-4488	2.38082	1	7.9617	6.9449	2.73039	6.06547	3.22381	0.857849	low
TCGA-05-4434	1.25205	1	6.83313	8.06951	2.94532	7.93195	12.3424	2.4412	high
TCGA-97-A4M0	1.7863	0	6.12869	5.95989	4.28555	7.21689	2.66392	0.557199	low
TCGA-44-2666	0.265753	1	5.60755	5.83597	2.057	4.82675	2.68881	0.482507	low
TCGA-49-4510	2.45479	1	6.77309	4.63902	2.78222	7.89338	4.71463	0.542991	low
TCGA-78-7155	3.20822	1	8.51457	7.09699	2.01058	5.10368	2.59412	0.878695	low
