# Supplementary material for: Identification of fatty acid-related subtypes, the establishment of a prognostic signature, and immune infiltration characteristics in lung adenocarcinoma
Source: Aging (Albany NY). 2023 May 16;15(10):4202–35. doi: 10.18632/aging.204725 (PMC10258028; doi:10.18632/aging.204725)
Supplement: Supplementary Table 13 [file aging-15-204725-s012.xlsx]

## Sheet: Sheet1
Supplementary Table 13. TMB for TCGA cohort.
id	TMB
TCGA-93-A4JQ	2.60526
TCGA-95-7948	3.10526
TCGA-55-6985	9.07895
TCGA-62-8394	2.55263
TCGA-91-6847	1.31579
TCGA-55-6970	3.71053
TCGA-86-8673	9.94737
TCGA-35-5375	8.86842
TCGA-MP-A4T4	8.26316
TCGA-73-4670	7.63158
TCGA-44-8117	16.2632
TCGA-95-7567	19
TCGA-53-7624	16.8684
TCGA-38-4629	5.78947
TCGA-78-7542	7.57895
TCGA-55-8203	9.10526
TCGA-05-4418	5.84211
TCGA-95-7947	11.4737
TCGA-MP-A4TF	8.71053
TCGA-35-4122	6.52632
TCGA-73-4659	4.47368
TCGA-55-8205	11.0789
TCGA-91-6848	11.7632
TCGA-55-1596	8.31579
TCGA-38-4625	12.0526
TCGA-62-A46O	18.9737
TCGA-44-7672	3.10526
TCGA-44-7662	12.0789
TCGA-NJ-A4YF	12.8947
TCGA-55-6712	2.47368
TCGA-64-5781	23.2895
TCGA-55-A493	5
TCGA-44-A47A	4.68421
TCGA-93-8067	19.4211
TCGA-55-6968	10.2105
TCGA-49-4507	4.18421
TCGA-55-7726	2.34211
TCGA-44-2662	16.1053
TCGA-55-6978	0.631579
TCGA-78-7147	7.10526
TCGA-38-6178	1.07895
TCGA-75-7027	4.76316
TCGA-95-7039	26.3421
TCGA-50-5044	2.31579
TCGA-MP-A4T7	3
TCGA-80-5611	4.18421
TCGA-95-7944	4.78947
TCGA-49-AAR4	11.5263
TCGA-J2-A4AD	6.55263
TCGA-64-1680	2.07895
TCGA-75-6214	14.8947
TCGA-55-7913	7
TCGA-97-8174	3.47368
TCGA-73-4677	5.44737
TCGA-64-1679	10.6842
TCGA-50-5939	1.55263
TCGA-78-7148	4.60526
TCGA-50-5933	10.3421
TCGA-62-8398	1.76316
TCGA-64-5815	3.60526
TCGA-49-6761	3.60526
TCGA-78-7160	0.684211
TCGA-MP-A4T8	2.47368
TCGA-62-A46V	1.15789
TCGA-55-8302	14.1579
TCGA-05-4415	4.13158
TCGA-50-5930	23.0526
TCGA-55-7903	3.34211
TCGA-50-6591	1.05263
TCGA-78-7154	4.44737
TCGA-78-7536	12.8947
TCGA-50-5045	6.07895
TCGA-95-7043	23.5263
TCGA-38-4628	2.68421
TCGA-73-7499	1.42105
TCGA-55-A490	27.7105
TCGA-86-A4JF	28.1579
TCGA-91-6830	4.28947
TCGA-55-8508	3.89474
TCGA-05-4390	11.5789
TCGA-97-8175	0.684211
TCGA-78-7150	8.52632
TCGA-J2-8194	3.18421
TCGA-50-8459	1.57895
TCGA-NJ-A4YP	11.2105
TCGA-67-3774	4.23684
TCGA-L9-A8F4	16.1579
TCGA-55-8092	11.5263
TCGA-49-AAR3	2.44737
TCGA-44-6145	6.57895
TCGA-97-8179	3.60526
TCGA-MN-A4N1	9.44737
TCGA-49-AAR9	13.6316
TCGA-38-4627	0.631579
TCGA-55-6984	0.421053
TCGA-44-3398	3.65789
TCGA-86-8674	6.05263
TCGA-49-4486	2.71053
TCGA-78-7145	3.84211
TCGA-MP-A4T9	0.631579
TCGA-MP-A4SY	3.23684
TCGA-62-8399	11.0526
TCGA-86-8359	3.36842
TCGA-64-1678	9.10526
TCGA-05-4397	18.1316
TCGA-38-4630	2.39474
TCGA-86-7713	3.39474
TCGA-95-8494	1.97368
TCGA-78-8655	2.36842
TCGA-05-5429	0.684211
TCGA-55-6975	1.52632
TCGA-44-7661	5.28947
TCGA-MP-A4TC	5.36842
TCGA-44-7671	4.86842
TCGA-44-4112	53.3947
TCGA-73-4675	1.42105
TCGA-49-6742	5.52632
TCGA-55-6979	2.44737
TCGA-05-5425	11.6053
TCGA-78-8660	4.97368
TCGA-64-1677	4.15789
TCGA-05-4398	14.1579
TCGA-55-6980	0.236842
TCGA-55-8204	4.42105
TCGA-44-7670	23.2105
TCGA-55-8299	3.73684
TCGA-62-A472	1.23684
TCGA-05-4420	5.73684
TCGA-86-8075	0.947368
TCGA-86-7955	6.65789
TCGA-50-5946	27.7895
TCGA-44-7660	7.05263
TCGA-86-A4D0	5.57895
TCGA-55-6981	1.18421
TCGA-L9-A5IP	5.86842
TCGA-86-7953	1.07895
TCGA-97-8176	3.07895
TCGA-86-6562	1.02632
TCGA-95-A4VN	9.52632
TCGA-55-A48Y	7.44737
TCGA-86-8054	4.60526
TCGA-MP-A4SV	6.63158
TCGA-80-5608	3.5
TCGA-50-5072	3.42105
TCGA-55-7570	8.18421
TCGA-86-7701	4.23684
TCGA-05-4434	0.921053
TCGA-55-5899	9.28947
TCGA-69-7979	31.1579
TCGA-44-2668	27.3158
TCGA-55-7574	4.89474
TCGA-69-7973	5.42105
TCGA-69-7980	17.0263
TCGA-49-6745	2.52632
TCGA-L4-A4E5	7
TCGA-38-4631	15.1316
TCGA-69-7760	1.42105
TCGA-49-6743	15.1316
TCGA-49-AARN	16.2632
TCGA-55-7724	4.36842
TCGA-05-4250	7.63158
TCGA-73-A9RS	20.0789
TCGA-78-7166	4.55263
TCGA-44-5644	20.3947
TCGA-69-8253	3.13158
TCGA-44-6779	2.02632
TCGA-50-6594	11.4737
TCGA-99-8033	3.68421
TCGA-91-6831	5.76316
TCGA-97-8547	1.15789
TCGA-73-4676	1.97368
TCGA-62-A46Y	0.842105
TCGA-49-4490	0.815789
TCGA-95-7562	9.23684
TCGA-L9-A743	2.34211
TCGA-73-4666	7.73684
TCGA-55-A48X	7.81579
TCGA-67-3771	46.2632
TCGA-55-8614	4.65789
TCGA-50-5931	6.5
TCGA-93-A4JO	1.07895
TCGA-55-7994	32.9474
TCGA-49-4494	3.78947
TCGA-MN-A4N4	30.6053
TCGA-55-7911	4.73684
TCGA-50-5066	13.4474
TCGA-49-4506	2.34211
TCGA-44-7667	9.57895
TCGA-78-7146	7.55263
TCGA-64-5774	2.94737
TCGA-50-6590	18.1053
TCGA-55-8090	1.84211
TCGA-50-6595	1.65789
TCGA-44-2665	3.28947
TCGA-55-1595	6.42105
TCGA-91-8499	6.94737
TCGA-69-7978	11.6579
TCGA-MP-A4TK	7.23684
TCGA-J2-8192	1.47368
TCGA-MN-A4N5	9.63158
TCGA-55-8615	2.21053
TCGA-NJ-A7XG	0.605263
TCGA-50-5941	7.81579
TCGA-75-5147	0.868421
TCGA-55-6986	0.394737
TCGA-64-5775	10.2895
TCGA-86-8585	12.3684
TCGA-50-5932	1.71053
TCGA-55-8089	25.2895
TCGA-55-8094	9.36842
TCGA-MP-A4TA	7.21053
TCGA-05-4402	2.52632
TCGA-78-8662	23.8421
TCGA-50-5936	2.52632
TCGA-86-8074	1.52632
TCGA-69-A59K	9.81579
TCGA-55-6982	4.36842
TCGA-86-8278	1.97368
TCGA-86-8672	6.13158
TCGA-44-3396	3.94737
TCGA-86-8055	0.868421
TCGA-86-7711	4.63158
TCGA-69-7763	1.34211
TCGA-62-A471	2.13158
TCGA-49-6744	4.26316
TCGA-05-4396	5.31579
TCGA-83-5908	4.84211
TCGA-49-AARE	25.7632
TCGA-67-6215	2.23684
TCGA-49-6767	9.47368
TCGA-55-8511	11.4211
TCGA-44-5643	2.71053
TCGA-93-A4JP	5.76316
TCGA-91-6836	9.39474
TCGA-38-4632	10.9474
TCGA-44-7669	9.81579
TCGA-75-5125	3.31579
TCGA-05-4425	0.868421
TCGA-49-AAQV	1.36842
TCGA-95-A4VK	5.36842
TCGA-55-A57B	0.947368
TCGA-78-7220	17.3158
TCGA-44-A4SS	9.86842
TCGA-69-7974	10.8158
TCGA-35-4123	5.65789
TCGA-44-3917	9.15789
TCGA-93-A4JN	1.52632
TCGA-05-4417	6.31579
TCGA-86-7714	1.71053
TCGA-05-5420	1.63158
TCGA-50-5055	0.263158
TCGA-78-7167	1.89474
TCGA-55-8510	6.34211
TCGA-55-7907	24.7105
TCGA-55-8616	10.2368
TCGA-86-8669	2.81579
TCGA-44-6148	0.131579
TCGA-55-6983	2.39474
TCGA-L9-A50W	0.684211
TCGA-MP-A4TH	2.42105
TCGA-55-7281	9.71053
TCGA-97-8177	0.605263
TCGA-55-8620	10.4474
TCGA-L9-A7SV	32.7368
TCGA-73-7498	2.28947
TCGA-44-3918	57.6842
TCGA-50-8457	1.18421
TCGA-05-4432	11.6053
TCGA-55-8514	6.02632
TCGA-44-6147	16.3158
TCGA-97-A4M1	0.921053
TCGA-05-4422	0.868421
TCGA-62-A470	2.52632
TCGA-44-2666	4.31579
TCGA-91-8496	0.578947
TCGA-55-6642	2.5
TCGA-62-A46U	0.868421
TCGA-50-6592	6.18421
TCGA-J2-A4AE	0.973684
TCGA-62-8397	0.578947
TCGA-05-4426	1.02632
TCGA-55-1592	21.6579
TCGA-78-7159	6.18421
TCGA-73-4668	9.65789
TCGA-NJ-A4YG	3.31579
TCGA-05-4384	2.68421
TCGA-53-7813	3.31579
TCGA-78-7153	2.21053
TCGA-91-6835	1.42105
TCGA-49-AARO	12.1579
TCGA-55-7576	7.81579
TCGA-97-7941	1.84211
TCGA-49-AAR0	2.63158
TCGA-78-7155	32.6842
TCGA-91-6829	13.2632
TCGA-55-8301	5.65789
TCGA-05-5428	7.76316
TCGA-67-6216	0.657895
TCGA-91-6840	2.55263
TCGA-97-7552	0.526316
TCGA-55-8091	0.526316
TCGA-86-8056	6.02632
TCGA-05-4403	2.89474
TCGA-67-3773	2.21053
TCGA-78-7633	2.15789
TCGA-S2-AA1A	2.55263
TCGA-91-A4BC	8.86842
TCGA-NJ-A55O	3.02632
TCGA-50-5935	1.76316
TCGA-50-5944	1.21053
TCGA-50-5068	1.84211
TCGA-05-4405	7.68421
TCGA-55-8507	20.6842
TCGA-50-5049	16.0263
TCGA-55-7910	6.65789
TCGA-44-8119	13.6316
TCGA-55-6987	3.73684
TCGA-67-3770	8.86842
TCGA-97-7546	5.78947
TCGA-50-8460	0.684211
TCGA-91-6849	2.31579
TCGA-L4-A4E6	0.105263
TCGA-73-4658	6.65789
TCGA-97-A4M6	0.578947
TCGA-99-8032	8.18421
TCGA-05-4389	4.57895
TCGA-78-7163	0.368421
TCGA-44-2661	0.736842
TCGA-97-8552	0.552632
TCGA-55-A494	4.94737
TCGA-44-3919	1.55263
TCGA-75-5146	3.73684
TCGA-55-8208	6.47368
TCGA-91-7771	3.94737
TCGA-MP-A4TJ	1.94737
TCGA-95-8039	1.92105
TCGA-86-8668	0.684211
TCGA-55-7815	3.02632
TCGA-62-A46P	5.86842
TCGA-78-8640	15.1316
TCGA-86-8076	1.28947
TCGA-55-8207	6.68421
TCGA-55-7914	3.78947
TCGA-4B-A93V	2.97368
TCGA-44-A4SU	2.97368
TCGA-62-8395	1.60526
TCGA-55-6543	0.5
TCGA-75-7025	0.552632
TCGA-55-8096	3.05263
TCGA-49-4510	1.05263
TCGA-49-4505	4.31579
TCGA-78-7149	2.97368
TCGA-69-7761	0.684211
TCGA-05-5423	3.23684
TCGA-91-6828	6.05263
TCGA-55-8513	0.0263158
TCGA-44-6776	4.23684
TCGA-50-7109	5.15789
TCGA-44-2656	100.658
TCGA-78-8648	0.157895
TCGA-71-6725	1.05263
TCGA-49-4514	6.42105
TCGA-78-7158	5.05263
TCGA-50-6673	1.21053
TCGA-55-6969	8.42105
TCGA-95-A4VP	2.39474
TCGA-44-A47B	1
TCGA-91-8497	0.763158
TCGA-50-6597	0.894737
TCGA-44-6146	4.42105
TCGA-71-8520	1.81579
TCGA-69-7764	1.63158
TCGA-97-7937	9.94737
TCGA-86-8073	30.4211
TCGA-86-8671	0.631579
TCGA-49-AARR	0.0263158
TCGA-78-7540	0.578947
TCGA-50-5051	2.23684
TCGA-05-4430	5.60526
TCGA-44-8120	12.6316
TCGA-64-5778	10.1053
TCGA-55-8087	0.605263
TCGA-55-6972	5.55263
TCGA-62-8402	0.921053
TCGA-91-A4BD	0.421053
TCGA-73-4662	4.36842
TCGA-97-7938	8.23684
TCGA-78-7535	3.34211
TCGA-MP-A5C7	1.26316
TCGA-55-7283	4.57895
TCGA-97-A4M5	3.21053
TCGA-44-7659	3.13158
TCGA-NJ-A55R	5.44737
TCGA-05-4424	14.1579
TCGA-78-7539	10.1053
TCGA-97-A4M3	4.52632
TCGA-49-AARQ	15.1842
TCGA-55-8512	0.815789
TCGA-55-A4DG	14.8684
TCGA-44-A479	6.23684
TCGA-78-7162	1.76316
TCGA-67-4679	5.97368
TCGA-05-4382	35.8158
TCGA-53-A4EZ	10.3947
TCGA-L9-A444	11.5526
TCGA-55-1594	6.26316
TCGA-05-5715	2.42105
TCGA-05-4249	7
TCGA-55-A491	7.78947
TCGA-99-8025	10.2105
TCGA-86-A456	7.26316
TCGA-99-7458	10.2368
TCGA-55-A4DF	15.8947
TCGA-44-6775	5.92105
TCGA-44-2655	7.28947
TCGA-69-8255	6.21053
TCGA-NJ-A4YQ	22.7368
TCGA-55-7728	1.92105
TCGA-97-A4LX	3.63158
TCGA-97-7554	9
TCGA-75-6212	0.421053
TCGA-MP-A4T6	1.5
TCGA-97-8172	5.57895
TCGA-67-6217	3.92105
TCGA-53-7626	7.47368
TCGA-49-AAR2	8.55263
TCGA-86-8279	10.8158
TCGA-50-5942	1.13158
TCGA-62-A46R	3.86842
TCGA-86-8280	1.02632
TCGA-62-A46S	2.42105
TCGA-NJ-A4YI	9.47368
TCGA-55-7727	5.10526
TCGA-05-4427	21.6053
TCGA-55-A48Z	1.02632
TCGA-38-A44F	0.210526
TCGA-J2-A4AG	1.55263
TCGA-O1-A52J	3.71053
TCGA-64-1681	1.47368
TCGA-38-4626	4.36842
TCGA-55-8206	0.552632
TCGA-38-7271	1.07895
TCGA-55-A492	5.63158
TCGA-MP-A4TE	2.84211
TCGA-69-8254	1.65789
TCGA-78-7152	4.15789
TCGA-L9-A443	5.42105
TCGA-50-6593	6.23684
TCGA-78-7161	3.73684
TCGA-44-6774	6.05263
TCGA-64-5779	7.84211
TCGA-78-7537	3.05263
TCGA-55-7995	14.0789
TCGA-97-A4M7	6.23684
TCGA-55-8085	5.42105
TCGA-44-A47G	1.44737
TCGA-MP-A4TD	1.44737
TCGA-86-6851	18.8158
TCGA-97-8171	1.10526
TCGA-55-8506	37.4211
TCGA-55-8619	0.368421
TCGA-97-7553	1
TCGA-97-7547	3.28947
TCGA-55-7227	3.36842
TCGA-69-7765	12.4737
TCGA-93-7348	2.26316
TCGA-64-1676	24.5263
TCGA-55-8621	1
TCGA-86-7954	3.97368
TCGA-49-4488	5.97368
TCGA-49-4501	0.815789
TCGA-MP-A4SW	1.13158
TCGA-44-2657	8.34211
TCGA-44-6777	7.60526
TCGA-97-A4M0	7.97368
TCGA-75-6206	1.97368
TCGA-NJ-A55A	2.05263
TCGA-93-7347	2.44737
TCGA-78-7156	6.63158
TCGA-99-8028	7.60526
TCGA-86-A4P7	1.31579
TCGA-99-AA5R	0.842105
TCGA-55-7284	0.789474
TCGA-44-5645	3.97368
TCGA-49-4487	7.10526
TCGA-55-7725	2.84211
TCGA-05-4433	0.789474
TCGA-49-4512	0.763158
TCGA-55-8097	2.23684
TCGA-55-7573	1.07895
TCGA-55-6971	1.76316
TCGA-44-6778	8.05263
