# Supplementary material for: Identification of fatty acid-related subtypes, the establishment of a prognostic signature, and immune infiltration characteristics in lung adenocarcinoma
Source: Aging (Albany NY). 2023 May 16;15(10):4202–35. doi: 10.18632/aging.204725 (PMC10258028; doi:10.18632/aging.204725)
Supplement: Supplementary Table 14 [file aging-15-204725-s013.xlsx]

## Sheet: Sheet1
Supplementary Table 14. CNVs analysis for TCGA cohort.
Patient	FGA	FGG	FGL
TCGA-05-4249	0.222128	0.0383244	0.183803
TCGA-05-4250	0.2362	0.200285	0.0359142
TCGA-05-4382	0.0854491	0.0364265	0.0490227
TCGA-05-4384	0.0660635	0.0182216	0.0478419
TCGA-05-4389	0.45793	0.259116	0.198814
TCGA-05-4390	0.305607	0.165916	0.139691
TCGA-05-4396	0.234002	0.183751	0.0502506
TCGA-05-4397	0.278381	0.167735	0.110647
TCGA-05-4398	0.304581	0.17193	0.13265
TCGA-05-4402	0.294917	0.197293	0.0976243
TCGA-05-4403	0.027215	0.000216963	0.0269981
TCGA-05-4405	0.390316	0.277588	0.112729
TCGA-05-4415	0.156284	0.071408	0.0848765
TCGA-05-4417	0.269851	0.17561	0.0942412
TCGA-05-4418	0.143335	0.073633	0.0697021
TCGA-05-4420	0.449858	0.205624	0.244234
TCGA-05-4422	0.230529	0.123673	0.106856
TCGA-05-4424	0.216098	0.0950077	0.12109
TCGA-05-4425	0.235234	0.133631	0.101602
TCGA-05-4426	0.144547	0.092681	0.0518662
TCGA-05-4427	0.394972	0.170453	0.224519
TCGA-05-4430	0.0992174	0.0116001	0.0876172
TCGA-05-4432	0.428568	0.244368	0.1842
TCGA-05-4433	0.15888	0.136612	0.0222684
TCGA-05-4434	0.123747	0.0756027	0.0481441
TCGA-05-5423	0.374855	0.0689438	0.305911
TCGA-05-5425	0.255068	0.126064	0.129004
TCGA-05-5428	0.540093	0.264197	0.275896
TCGA-05-5429	0.246572	0.0882916	0.15828
TCGA-05-5715	0.320047	0.25733	0.0627168
TCGA-35-3615	0.179549	0.0580704	0.121478
TCGA-35-4122	0.0597482	0.0192677	0.0404805
TCGA-35-4123	0.311902	0.175859	0.136043
TCGA-35-5375	0.599566	0.290985	0.308581
TCGA-38-4625	0.526068	0.306713	0.219355
TCGA-38-4626	0.0205767	1.11e-05	0.0205655
TCGA-38-4627	0.000303677	0.000258483	4.52e-05
TCGA-38-4628	0.486449	0.23043	0.256019
TCGA-38-4631	0.403167	0.208447	0.19472
TCGA-38-4632	0.432515	0.20473	0.227785
TCGA-38-6178	0.390406	0.201803	0.188603
TCGA-38-7271	0.0438867	4.28e-05	0.0438439
TCGA-38-A44F	3.92e-06	3.92e-06	0
TCGA-44-2655	0.0718903	0.0362905	0.0355999
TCGA-44-2656	0.22595	0.120598	0.105353
TCGA-44-2657	0.0456513	0.000187342	0.045464
TCGA-44-2659	0.282285	0.162336	0.11995
TCGA-44-2662	0.145268	0.100245	0.0450231
TCGA-44-2665	0.202469	0.0936392	0.10883
TCGA-44-2666	0.0625394	0.0584447	0.0040947
TCGA-44-2668	0.179937	0.0787522	0.101185
TCGA-44-3396	0.0806824	0.0196888	0.0609937
TCGA-44-3398	0.00227472	8.58e-06	0.00226614
TCGA-44-3917	0.431217	0.269866	0.161351
TCGA-44-3918	0.228208	0.128944	0.0992638
TCGA-44-3919	0.165757	0.118272	0.047485
TCGA-44-4112	0.133868	0.0442408	0.0896274
TCGA-44-5643	0.565824	0.444952	0.120872
TCGA-44-5644	0.663222	0.390317	0.272906
TCGA-44-5645	0.188936	0.00646176	0.182474
TCGA-44-6145	0.0269745	3.46e-05	0.0269399
TCGA-44-6146	0.126506	0.125863	0.000643575
TCGA-44-6148	0.0275583	2.02e-05	0.0275381
TCGA-44-6774	0.20295	0.126003	0.0769471
TCGA-44-6775	0.161506	0.0965339	0.0649716
TCGA-44-6776	0.166538	0.108697	0.0578411
TCGA-44-6777	0.104563	0.0415863	0.0629764
TCGA-44-6778	0.399222	0.30257	0.0966523
TCGA-44-6779	0.599292	0.307353	0.291939
TCGA-44-7659	0.159769	0.0520032	0.107766
TCGA-44-7660	0.665253	0.340581	0.324672
TCGA-44-7661	0.0146694	0.00595928	0.00871016
TCGA-44-7662	0.273877	0.112814	0.161063
TCGA-44-7667	0.386644	0.222442	0.164202
TCGA-44-7669	0.414418	0.219088	0.195331
TCGA-44-7670	0.634482	0.329234	0.305247
TCGA-44-7671	0.315443	0.1375	0.177943
TCGA-44-7672	0.0680842	0.0370213	0.0310629
TCGA-44-8117	0.63492	0.378031	0.256889
TCGA-44-8119	0.400784	0.198339	0.202445
TCGA-44-8120	0.371579	0.30086	0.0707192
TCGA-44-A479	0.0802774	0.0398569	0.0404205
TCGA-44-A47A	0.127232	0.009242	0.11799
TCGA-44-A47B	0.306327	0.135013	0.171313
TCGA-44-A47G	0.000332369	0.000143361	0.000189009
TCGA-44-A4SS	0.0108887	0.0090824	0.00180627
TCGA-44-A4SU	0.311312	0.164691	0.146621
TCGA-49-4486	0.111581	0.0300145	0.0815669
TCGA-49-4487	0.117735	0.0154106	0.102324
TCGA-49-4488	0.413802	0.191392	0.222409
TCGA-49-4490	0.291616	0.170577	0.121039
TCGA-49-4494	0.147298	0.0754573	0.0718406
TCGA-49-4501	0.316828	0.149927	0.166902
TCGA-49-4505	0.472971	0.301924	0.171047
TCGA-49-4506	0.0385646	2.13e-05	0.0385433
TCGA-49-4507	0.205358	0.0861166	0.119242
TCGA-49-4510	0.429718	0.254671	0.175047
TCGA-49-4512	0.311555	0.146605	0.16495
TCGA-49-4514	0.272548	0.220971	0.051577
TCGA-49-6742	0.134291	0.0650743	0.0692165
TCGA-49-6743	0.110227	0.0220993	0.0881279
TCGA-49-6744	0.0900947	0.0565753	0.0335195
TCGA-49-6745	0.0918951	0.0216698	0.0702253
TCGA-49-6761	0.129093	0.0526685	0.0764241
TCGA-49-6767	0.334965	0.225228	0.109737
TCGA-49-AAQV	0.174713	0.0615578	0.113155
TCGA-49-AAR0	0.142807	0.0698524	0.0729544
TCGA-49-AAR2	0.246582	0.174163	0.072419
TCGA-49-AAR3	0.0086313	1.93e-05	0.00861202
TCGA-49-AAR4	0.0165778	0.00119477	0.0153831
TCGA-49-AAR9	0.485262	0.254082	0.231181
TCGA-49-AARE	0.298769	0.137438	0.161331
TCGA-49-AARN	0.184205	0.146631	0.0375745
TCGA-49-AARO	0.168594	0.0747732	0.0938206
TCGA-49-AARQ	0.358464	0.209255	0.149208
TCGA-49-AARR	9.31e-05	7.31e-05	1.99e-05
TCGA-4B-A93V	0.446668	0.189231	0.257437
TCGA-50-5044	0.00030977	0.000279189	3.06e-05
TCGA-50-5045	0.0849768	0.0255897	0.0593871
TCGA-50-5049	0.0468074	0.0180277	0.0287797
TCGA-50-5051	0.535255	0.310204	0.225051
TCGA-50-5055	0.0342378	4.88e-06	0.0342329
TCGA-50-5066	0.266957	0.133028	0.133929
TCGA-50-5068	0.0114782	0.000601624	0.0108766
TCGA-50-5072	0.172087	0.0916326	0.0804548
TCGA-50-5930	0.150298	0.0718611	0.0784373
TCGA-50-5931	0.453857	0.253806	0.200051
TCGA-50-5932	0.35155	0.267982	0.0835684
TCGA-50-5933	0.150425	0.0328306	0.117594
TCGA-50-5935	0.416316	0.247519	0.168797
TCGA-50-5936	0.373728	0.28834	0.085388
TCGA-50-5939	0.0732311	0.0661818	0.00704928
TCGA-50-5941	0.113405	0.0201384	0.093267
TCGA-50-5942	0.0483312	0.0483312	0
TCGA-50-5944	0.405978	0.14411	0.261868
TCGA-50-5946	0.611267	0.294485	0.316783
TCGA-50-6590	0.103489	0.000241744	0.103248
TCGA-50-6591	0.579423	0.333577	0.245846
TCGA-50-6592	0.0986813	0.0356705	0.0630108
TCGA-50-6593	0.209049	0.0339349	0.175114
TCGA-50-6594	0.47872	0.271545	0.207175
TCGA-50-6595	0.0247525	2.71e-05	0.0247254
TCGA-50-6597	0.266952	0.180236	0.0867153
TCGA-50-6673	0.220181	0.101532	0.118648
TCGA-50-7109	0.549678	0.352557	0.19712
TCGA-50-8457	0.0581453	4.15e-06	0.0581411
TCGA-50-8459	0.00646724	0.00512855	0.00133869
TCGA-50-8460	0.200476	0.136184	0.0642924
TCGA-53-7624	0.667343	0.327745	0.339598
TCGA-53-7626	0.253547	0.154377	0.0991694
TCGA-53-7813	0.251548	0.168845	0.0827036
TCGA-53-A4EZ	0.658586	0.343509	0.315077
TCGA-55-1592	0.583502	0.298301	0.285202
TCGA-55-1594	0.656603	0.296097	0.360506
TCGA-55-1595	0.612842	0.306266	0.306576
TCGA-55-1596	0.749614	0.305834	0.44378
TCGA-55-5899	0.601408	0.375614	0.225793
TCGA-55-6543	0.292288	0.0567519	0.235536
TCGA-55-6642	0.144376	0.0219223	0.122453
TCGA-55-6712	0.312856	0.176189	0.136667
TCGA-55-6968	0.381497	0.29702	0.0844775
TCGA-55-6969	0.0771847	0.0157104	0.0614743
TCGA-55-6970	0.240615	5.27e-05	0.240563
TCGA-55-6971	0.0621638	0.00477086	0.0573929
TCGA-55-6972	0.460884	0.197855	0.26303
TCGA-55-6975	0.196034	0.133112	0.0629222
TCGA-55-6978	0.0102236	1.34e-05	0.0102102
TCGA-55-6979	0.0568252	0.0123618	0.0444634
TCGA-55-6980	0.185538	0.0739094	0.111629
TCGA-55-6981	0.290224	0.202864	0.0873601
TCGA-55-6982	0.0798904	0.0207271	0.0591633
TCGA-55-6983	0.0996066	0.0588534	0.0407533
TCGA-55-6984	0.160884	0.0604523	0.100432
TCGA-55-6985	0.199952	0.0951872	0.104765
TCGA-55-6986	0.0409941	0.0409148	7.93e-05
TCGA-55-6987	0.070648	0.000402204	0.0702458
TCGA-55-7281	0.42151	0.21832	0.20319
TCGA-55-7283	0.252472	0.0693289	0.183143
TCGA-55-7284	0.0259061	0.00810284	0.0178032
TCGA-55-7570	0.251432	0.219815	0.0316171
TCGA-55-7573	0.344513	0.20074	0.143773
TCGA-55-7574	0.038542	1.5e-05	0.038527
TCGA-55-7576	0.440448	0.23459	0.205858
TCGA-55-7724	0.0190063	0.000168209	0.0188381
TCGA-55-7725	0.138767	0.0670768	0.0716903
TCGA-55-7726	0.258725	0.0967704	0.161955
TCGA-55-7727	0.200618	0.135874	0.0647445
TCGA-55-7728	0.0589911	0.0406	0.0183911
TCGA-55-7815	0.131789	0.0747241	0.0570645
TCGA-55-7903	0.258717	0.152852	0.105865
TCGA-55-7907	0.348208	0.191336	0.156873
TCGA-55-7910	0.528427	0.248327	0.2801
TCGA-55-7911	0.0964237	0.0424449	0.0539788
TCGA-55-7913	0.196031	0.0599736	0.136057
TCGA-55-7914	0.25499	0.154298	0.100691
TCGA-55-7994	0.586147	0.319058	0.267089
TCGA-55-7995	0.320754	0.15781	0.162944
TCGA-55-8085	0.277863	0.0881268	0.189736
TCGA-55-8087	0.0996066	0.0528852	0.0467214
TCGA-55-8089	0.0324636	0.000464602	0.031999
TCGA-55-8090	0.0642881	0.0296366	0.0346515
TCGA-55-8091	0.484506	0.25107	0.233436
TCGA-55-8092	0.308432	0.197695	0.110736
TCGA-55-8094	0.661298	0.435375	0.225923
TCGA-55-8096	0.0907574	0.0304455	0.0603119
TCGA-55-8097	0.213329	0.0982523	0.115076
TCGA-55-8203	0.283482	0.135886	0.147596
TCGA-55-8204	0.278272	0.204036	0.0742356
TCGA-55-8205	0.104566	0.00136217	0.103204
TCGA-55-8206	0.161445	0.157757	0.00368791
TCGA-55-8207	0.461383	0.249576	0.211807
TCGA-55-8208	0.0438764	3.91e-05	0.0438373
TCGA-55-8299	3.47e-05	3.47e-05	0
TCGA-55-8301	0.0757937	0.00242104	0.0733727
TCGA-55-8302	0.170757	0.0812373	0.0895198
TCGA-55-8505	0.00956837	0.00763121	0.00193715
TCGA-55-8506	0.326719	0.178361	0.148358
TCGA-55-8507	0.564173	0.324759	0.239413
TCGA-55-8508	0.180164	0.0928239	0.0873398
TCGA-55-8510	0.124575	0.0197887	0.104786
TCGA-55-8511	0.122452	0.0321045	0.090347
TCGA-55-8512	0.189484	0.126713	0.0627712
TCGA-55-8513	0	0	0
TCGA-55-8514	0.801307	0.371202	0.430106
TCGA-55-8614	0.331983	0.166874	0.165109
TCGA-55-8615	0.678603	0.400614	0.277988
TCGA-55-8616	0.384791	0.237181	0.14761
TCGA-55-8619	1.07e-05	6.09e-06	4.6e-06
TCGA-55-8620	0.349296	0.217091	0.132205
TCGA-55-8621	1.12e-05	1.12e-05	0
TCGA-55-A48X	0.00657453	4.76e-05	0.00652693
TCGA-55-A48Y	0.188621	0.105499	0.0831217
TCGA-55-A48Z	0.320544	0.145919	0.174625
TCGA-55-A490	0.541945	0.247289	0.294657
TCGA-55-A491	0.477036	0.285218	0.191817
TCGA-55-A492	0.206905	0.14655	0.0603542
TCGA-55-A493	0.0981125	3.15e-05	0.0980809
TCGA-55-A494	0.331646	0.0980489	0.233597
TCGA-55-A4DF	0.366656	0.233832	0.132824
TCGA-55-A4DG	0.426435	0.256209	0.170226
TCGA-55-A57B	0.214994	0.174084	0.0409096
TCGA-62-8394	0.418834	0.219465	0.199369
TCGA-62-8395	0.213712	0.159476	0.0542359
TCGA-62-8397	0.230807	0.123035	0.107772
TCGA-62-8398	0.30337	0.131404	0.171967
TCGA-62-8399	0.488389	0.22414	0.264249
TCGA-62-8402	0.372861	0.281383	0.091478
TCGA-62-A46O	0.60856	0.325981	0.282579
TCGA-62-A46P	0.224962	0.0943104	0.130651
TCGA-62-A46R	0.394372	0.206896	0.187476
TCGA-62-A46S	0.23308	0.109559	0.123521
TCGA-62-A46U	0.157131	0.0866461	0.0704847
TCGA-62-A46V	0.292038	0.192178	0.0998601
TCGA-62-A46Y	0.143078	0.0693008	0.0737774
TCGA-62-A470	0.599146	0.29683	0.302316
TCGA-62-A471	0.440877	0.269481	0.171396
TCGA-62-A472	0.294427	0.202452	0.0919756
TCGA-64-1676	0.485106	0.331101	0.154005
TCGA-64-1677	0.127684	0.029124	0.0985602
TCGA-64-1678	0.547638	0.290354	0.257284
TCGA-64-1679	0.197873	0.122379	0.0754947
TCGA-64-1680	0.34038	0.0597841	0.280596
TCGA-64-1681	0.345841	0.132156	0.213686
TCGA-64-5774	0.603424	0.354799	0.248626
TCGA-64-5775	0.323777	0.118744	0.205033
TCGA-64-5778	0.326388	0.277266	0.0491219
TCGA-64-5779	0.668205	0.438353	0.229852
TCGA-64-5781	0.18079	0.104827	0.0759626
TCGA-64-5815	0.18498	0.127918	0.0570619
TCGA-67-3770	0.391814	0.230196	0.161618
TCGA-67-3771	0.630772	0.378724	0.252049
TCGA-67-3772	0.328278	0.169578	0.1587
TCGA-67-3773	0.122424	0.0767407	0.0456829
TCGA-67-3774	0.215421	0.165283	0.0501383
TCGA-67-4679	0.169362	0.0698861	0.0994757
TCGA-67-6215	0.21222	0.0145071	0.197713
TCGA-67-6216	0.0855064	0.0853744	0.000132024
TCGA-67-6217	0.429237	0.229367	0.19987
TCGA-69-7760	0.55821	0.266727	0.291484
TCGA-69-7761	0.0782334	0.0712298	0.00700357
TCGA-69-7763	0.167543	0.0449553	0.122587
TCGA-69-7764	0.494376	0.247344	0.247032
TCGA-69-7765	0.140848	0.0912136	0.0496341
TCGA-69-7973	0.471648	0.251763	0.219884
TCGA-69-7974	0.195911	0.118801	0.0771096
TCGA-69-7978	0.0369116	8.61e-05	0.0368255
TCGA-69-7979	0.6272	0.306013	0.321187
TCGA-69-7980	0.426186	0.147065	0.279121
TCGA-69-8253	0.231379	0.180636	0.0507438
TCGA-69-8254	0.0322121	0.0322121	0
TCGA-69-8255	0.408102	0.242572	0.165531
TCGA-69-8453	0.104601	0.10225	0.00235099
TCGA-69-A59K	0.494327	0.329618	0.164709
TCGA-71-6725	0.693439	0.469556	0.223883
TCGA-73-4658	0.0648084	0.0114935	0.0533149
TCGA-73-4659	0.248997	0.108047	0.14095
TCGA-73-4662	0.492869	0.330171	0.162698
TCGA-73-4666	0.370882	0.242839	0.128043
TCGA-73-4668	0.498961	0.283103	0.215858
TCGA-73-4670	0.678566	0.397737	0.280829
TCGA-73-4675	0.258954	0.150768	0.108186
TCGA-73-4676	0.21077	0.0012976	0.209472
TCGA-73-4677	0.181337	0.125702	0.0556356
TCGA-73-7498	0.176927	0.0831009	0.0938258
TCGA-73-7499	0.572341	0.328513	0.243828
TCGA-73-A9RS	0.659943	0.427626	0.232317
TCGA-75-5125	0.303496	0.141968	0.161528
TCGA-75-5146	0.321896	0.272527	0.0493692
TCGA-75-5147	0.414003	0.185709	0.228294
TCGA-75-6206	0.420276	0.143785	0.276491
TCGA-75-6212	0.236478	0.184905	0.0515733
TCGA-75-6214	0.519035	0.282598	0.236437
TCGA-75-7025	0.215255	0.143025	0.0722295
TCGA-75-7027	0.657	0.370749	0.286251
TCGA-78-7143	0.197374	0.109019	0.0883551
TCGA-78-7145	0.558508	0.21112	0.347387
TCGA-78-7146	0.573267	0.40748	0.165787
TCGA-78-7147	0.598892	0.274831	0.324061
TCGA-78-7148	0.287464	0.197013	0.0904506
TCGA-78-7149	0.250116	0.169876	0.0802403
TCGA-78-7150	0.458857	0.250979	0.207878
TCGA-78-7152	0.160054	0.0872296	0.0728242
TCGA-78-7153	0.210681	0.148674	0.0620067
TCGA-78-7154	0.356554	0.151709	0.204844
TCGA-78-7155	0.43529	0.103512	0.331777
TCGA-78-7156	0.111507	0.0626856	0.0488216
TCGA-78-7158	0.143198	0.046768	0.09643
TCGA-78-7159	0.244031	0.0838606	0.160171
TCGA-78-7160	0.0344513	1.78e-05	0.0344335
TCGA-78-7161	0.486417	0.210303	0.276113
TCGA-78-7162	0.0573769	0.0361416	0.0212353
TCGA-78-7163	0.387234	0.0811498	0.306085
TCGA-78-7166	0.093511	0.0414492	0.0520618
TCGA-78-7167	0.489481	0.360741	0.128741
TCGA-78-7220	0.533332	0.275307	0.258025
TCGA-78-7535	0.784346	0.489718	0.294628
TCGA-78-7536	0.721212	0.396783	0.324429
TCGA-78-7537	0.128488	0.0544122	0.0740761
TCGA-78-7539	0.320598	0.172937	0.147661
TCGA-78-7540	0.194764	0.0997782	0.094986
TCGA-78-7542	0.401889	0.182993	0.218896
TCGA-78-7633	0.310655	0.0802802	0.230375
TCGA-78-8640	0.172759	0.0614063	0.111353
TCGA-78-8648	1.54e-05	1.53e-05	7.2e-08
TCGA-78-8655	0.261905	0.0993828	0.162522
TCGA-78-8660	0.00706262	0.00125104	0.00581158
TCGA-78-8662	0.739375	0.510908	0.228466
TCGA-80-5608	0.449894	0.22989	0.220004
TCGA-80-5611	0.57281	0.29073	0.28208
TCGA-83-5908	0.0275536	0.00610537	0.0214482
TCGA-86-6562	0.378939	0.230083	0.148857
TCGA-86-6851	0.178652	0.112278	0.0663748
TCGA-86-7701	0.168488	0.0617586	0.106729
TCGA-86-7711	0.417593	0.300317	0.117276
TCGA-86-7713	0.367658	0.232193	0.135465
TCGA-86-7714	0.0639225	0.0638994	2.31e-05
TCGA-86-7953	0.35058	0.292963	0.0576173
TCGA-86-7954	0.259461	0.130582	0.128879
TCGA-86-7955	0.606254	0.288469	0.317785
TCGA-86-8054	0.599957	0.402209	0.197749
TCGA-86-8055	0.183095	0.115503	0.0675913
TCGA-86-8056	0.124129	0.0978512	0.0262782
TCGA-86-8073	0.230749	0.155042	0.0757063
TCGA-86-8074	0.463924	0.20491	0.259014
TCGA-86-8075	0.239726	0.0787727	0.160954
TCGA-86-8076	0.0338619	0.000128947	0.0337329
TCGA-86-8278	0.212905	0.192491	0.0204142
TCGA-86-8279	0.598552	0.355728	0.242824
TCGA-86-8280	0.291464	0.130828	0.160636
TCGA-86-8358	0.529255	0.289704	0.23955
TCGA-86-8359	0.387509	0.232692	0.154817
TCGA-86-8585	0.0819686	0.000567795	0.0814008
TCGA-86-8668	0.18901	0.126231	0.0627788
TCGA-86-8669	0.289758	0.0989909	0.190767
TCGA-86-8671	0.00230358	7.45e-06	0.00229613
TCGA-86-8672	0.0474945	0.00100534	0.0464891
TCGA-86-8673	0.214694	0.0644925	0.150201
TCGA-86-8674	0.147654	0.0423999	0.105254
TCGA-86-A456	0.0300402	4.79e-05	0.0299923
TCGA-86-A4D0	0.305896	0.184807	0.121089
TCGA-86-A4JF	0.109741	0.0700186	0.0397221
TCGA-86-A4P7	0.0145061	0.0133663	0.00113985
TCGA-86-A4P8	6.88e-05	6.88e-05	0
TCGA-91-6828	0.248693	0.132396	0.116297
TCGA-91-6829	0.401971	0.227026	0.174945
TCGA-91-6830	0.0450939	8.4e-05	0.0450098
TCGA-91-6831	0.458974	0.264569	0.194405
TCGA-91-6835	0.0486279	0.0120004	0.0366275
TCGA-91-6836	0.54865	0.203179	0.34547
TCGA-91-6840	0.619289	0.387736	0.231552
TCGA-91-6847	0.599775	0.330518	0.269258
TCGA-91-6848	0.256505	0.121283	0.135222
TCGA-91-6849	0.155473	0.110536	0.0449367
TCGA-91-7771	0.255792	0.140319	0.115474
TCGA-91-8496	0.210184	0.0363918	0.173792
TCGA-91-8497	0.0871771	0.0573902	0.0297869
TCGA-91-8499	0.644656	0.411608	0.233048
TCGA-91-A4BC	0.0734293	8.5e-06	0.0734208
TCGA-91-A4BD	0.136987	0.0751761	0.0618105
TCGA-93-7347	0.0159845	0.000834372	0.0151501
TCGA-93-7348	0.0547315	0.000839301	0.0538922
TCGA-93-8067	0.325075	0.135787	0.189288
TCGA-93-A4JN	0.220277	0.0402776	0.18
TCGA-93-A4JO	0.0323682	9.85e-05	0.0322697
TCGA-93-A4JP	0.0380813	2.3e-05	0.0380583
TCGA-93-A4JQ	0.0417743	0.00697877	0.0347955
TCGA-95-7039	0.448186	0.25836	0.189826
TCGA-95-7043	0.526106	0.217739	0.308367
TCGA-95-7562	0.41006	0.2086	0.20146
TCGA-95-7567	0.324915	0.188507	0.136408
TCGA-95-7944	0.062425	0.0108931	0.051532
TCGA-95-7947	0.407409	0.198657	0.208752
TCGA-95-7948	0.373329	0.214981	0.158348
TCGA-95-8039	0.11389	0.0683818	0.045508
TCGA-95-8494	0.403351	0.202704	0.200647
TCGA-95-A4VK	0.190749	0.0881296	0.10262
TCGA-95-A4VN	0.166927	0.0620022	0.104925
TCGA-95-A4VP	0.143024	0.0119765	0.131048
TCGA-97-7546	0.0936451	0.0627251	0.0309199
TCGA-97-7547	0.348041	0.152451	0.19559
TCGA-97-7552	0.00369999	0.00360923	9.08e-05
TCGA-97-7553	0.0368724	1.83e-05	0.0368541
TCGA-97-7554	0.316341	0.156107	0.160234
TCGA-97-7937	0.449554	0.216289	0.233266
TCGA-97-7938	0.217579	0.0854848	0.132095
TCGA-97-7941	0.0267957	0.0267554	4.02e-05
TCGA-97-8171	0.218135	0.0500231	0.168112
TCGA-97-8172	0.121353	0.043737	0.0776157
TCGA-97-8174	0.298169	0.140256	0.157912
TCGA-97-8175	0.133604	0.0542673	0.0793362
TCGA-97-8176	0.174825	0.110744	0.0640816
TCGA-97-8177	0.16769	0.0877158	0.0799743
TCGA-97-8179	0.438858	0.205979	0.232879
TCGA-97-8547	0.327262	0.234535	0.0927271
TCGA-97-8552	0.31207	0.149473	0.162597
TCGA-97-A4LX	0.0345936	4.23e-06	0.0345893
TCGA-97-A4M0	0.299236	0.150116	0.149121
TCGA-97-A4M1	0.245896	0.0667808	0.179115
TCGA-97-A4M2	0.000241687	0.000234258	7.43e-06
TCGA-97-A4M3	0.236978	0.107425	0.129553
TCGA-97-A4M5	0.0418108	5.21e-05	0.0417586
TCGA-97-A4M6	0.342663	0.258078	0.0845851
TCGA-97-A4M7	0.238616	0.166194	0.0724215
TCGA-99-7458	0.00607323	9e-06	0.00606424
TCGA-99-8025	0.510804	0.26959	0.241213
TCGA-99-8028	0.018135	0.000178443	0.0179566
TCGA-99-8032	0.185559	0.10354	0.082019
TCGA-99-8033	0.0929703	0.0284472	0.0645231
TCGA-99-AA5R	0.000722736	5.54e-05	0.000667308
TCGA-J2-8192	0.0667187	0.0125625	0.0541562
TCGA-J2-8194	0.273997	0.145747	0.128249
TCGA-J2-A4AD	0.319645	0.219078	0.100566
TCGA-J2-A4AE	0.185909	0.039479	0.14643
TCGA-J2-A4AG	0.0236198	0.00432878	0.019291
TCGA-L4-A4E5	0.524563	0.406287	0.118276
TCGA-L4-A4E6	9.79e-07	9.79e-07	0
TCGA-L9-A443	0.350823	0.167876	0.182947
TCGA-L9-A444	0.349852	0.144287	0.205565
TCGA-L9-A50W	0.258862	0.167195	0.0916671
TCGA-L9-A5IP	0.228627	0.0336633	0.194964
TCGA-L9-A743	0.0134545	4.71e-05	0.0134074
TCGA-L9-A7SV	0.621799	0.363799	0.258
TCGA-L9-A8F4	0.130439	0.0287782	0.101661
TCGA-MN-A4N1	0.493925	0.248048	0.245878
TCGA-MN-A4N4	0.35521	0.213371	0.141839
TCGA-MN-A4N5	0.433516	0.252937	0.180579
TCGA-MP-A4SV	0.193168	0.0855193	0.107649
TCGA-MP-A4SW	0.280553	0.163864	0.116689
TCGA-MP-A4SY	0.0944342	0.00199328	0.0924409
TCGA-MP-A4T4	0.0676694	0.00414212	0.0635273
TCGA-MP-A4T6	0.710736	0.336325	0.374411
TCGA-MP-A4T7	0.273773	0.192765	0.0810082
TCGA-MP-A4T8	0.359917	0.209728	0.150188
TCGA-MP-A4T9	0.0198445	2.69e-05	0.0198177
TCGA-MP-A4TA	0.0176317	0.000176982	0.0174547
TCGA-MP-A4TC	0.13564	0.0146558	0.120985
TCGA-MP-A4TD	0.219086	0.126077	0.0930084
TCGA-MP-A4TE	0.447598	0.223539	0.22406
TCGA-MP-A4TF	0.414092	0.230859	0.183233
TCGA-MP-A4TH	0.186227	0.0603568	0.125871
TCGA-MP-A4TI	0.0113727	0.00407649	0.00729617
TCGA-MP-A4TJ	0.0473605	0.00725379	0.0401067
TCGA-MP-A4TK	0.197126	0.0856554	0.111471
TCGA-MP-A5C7	0.216558	0.122254	0.0943041
TCGA-NJ-A4YF	0.654454	0.366546	0.287908
TCGA-NJ-A4YG	0.118529	1.7e-05	0.118512
TCGA-NJ-A4YI	0.257901	0.164551	0.09335
TCGA-NJ-A4YP	0.127193	0.0573888	0.0698039
TCGA-NJ-A4YQ	0.104385	0.0161942	0.0881906
TCGA-NJ-A55A	0.000421151	1.1e-05	0.000410191
TCGA-NJ-A55O	0.0193686	2.15e-05	0.0193471
TCGA-NJ-A55R	0.0760143	0.038649	0.0373652
TCGA-NJ-A7XG	0.420485	0.246242	0.174243
TCGA-O1-A52J	0.544268	0.271917	0.272351
TCGA-S2-AA1A	0.0598061	0.00540949	0.0543966
