# Supplementary material for: Identification of fatty acid-related subtypes, the establishment of a prognostic signature, and immune infiltration characteristics in lung adenocarcinoma
Source: Aging (Albany NY). 2023 May 16;15(10):4202–35. doi: 10.18632/aging.204725 (PMC10258028; doi:10.18632/aging.204725)
Supplement: Supplementary Table 15 [file aging-15-204725-s014.xlsx]

## Sheet: Sheet1
Supplementary Table 15. The anti-cancer score between different FA score groups.
Steps	Release of cancer cell antigens	Cancer antigen presentation	Priming and activation	T cell recruiting	CD4 T cell recruiting	CD8 T cell recruiting	Th1 cell recruiting	Dendritic cell recruiting	Th22 cell recruiting	Macrophage recruiting	Monocyte recruiting	Neutrophil recruiting	NK cell recruiting	Eosinophil recruiting	Basophil recruiting	Th17 cell recruiting	B cell recruiting	Th2 cell recruiting	Treg cell recruiting	MDSC recruiting	Infiltration of immune cells into tumors	Recognition of cancer cells by T cells	Killing of cancer cells
GSM773540	-0.538	-0.004	-0.211	1.506	0.843	0.181	-1.239	-0.207	-0.597	-0.175	-1.242	-0.291	-0.374	-2.05	-1.248	0.915	-0.19	-0.504	-1.103	-0.081	-1.735	0.662	0.176
GSM773541	0.019	1.88	-0.618	-1.023	1.061	1.429	0.426	1.039	0.887	-0.829	0.319	1.471	0.952	-0.93	-1.674	0.254	-0.546	-0.125	-0.825	0.321	-0.824	0.417	-0.083
GSM773542	-0.128	1.554	-0.027	-0.9	0.431	-0.978	-0.997	-0.639	-1.598	1.124	-0.659	0.039	0.54	-0.956	-1.485	-0.919	-0.969	0.163	-0.432	-0.071	-1.214	-0.599	1.06
GSM773543	0.047	1.89	-0.508	-0.732	1.339	1.012	-0.876	0.09	-1.118	-1.151	0.184	-0.864	-0.274	-2.367	-1.755	0.44	-1.358	-2.701	-2.929	-0.747	-0.704	-2.292	1.325
GSM773544	-0.359	0.689	0.588	1.121	0.919	-0.347	-0.098	0.414	0.916	0.508	-0.493	-0.246	-1.066	-2.624	-2.071	0.101	-0.925	-2.359	-2.22	-0.845	-1.28	-0.281	1.118
GSM773545	0.384	1.432	-0.533	0.628	1.852	2.314	1.448	1.279	1.087	1.068	-0.296	-0.42	1.928	-1.69	-2.02	0.356	-1.311	-0.543	-1.257	-0.475	-0.51	-1.099	-0.429
GSM773546	0.287	1.859	0.605	-1.115	0.93	2.623	1.126	-0.605	-0.169	-0.931	0.416	1.724	1.617	-0.139	-1.945	1.125	-0.074	-1.478	-1.223	-0.578	-0.301	-1.597	0.974
GSM773547	-0.274	0.956	-0.428	-0.538	1.323	1.164	0.285	0.522	0.526	1.101	-0.635	0.108	0.651	-1.67	-1.531	0.494	0.337	0.283	-1.062	-0.538	-1.502	-0.905	-1.047
GSM773548	-0.029	-0.518	0.668	-1.021	1.057	1.315	0.421	0.936	0.658	-0.04	-0.96	0.99	1.021	-2.48	-2.44	-0.004	-1.537	-1.186	-2.096	-0.691	-2.799	0.094	1.929
GSM773550	-0.263	2.51	0.821	-0.207	0.758	0.482	0.528	-0.664	0.905	1.372	0.084	1.911	-0.755	-1.8	-1.204	0.929	-1.448	-1.627	-2.361	-0.686	-0.981	1.065	1.11
GSM773551	0.107	0.063	0.892	0.882	2.324	2.82	1.661	1.504	0.978	-0.432	0.665	1.385	2.102	-1.842	-2.105	2.189	1.197	-0.214	-0.964	-1.08	-0.849	-0.455	-0.261
GSM773552	0.552	1.715	-0.76	0.176	0.83	2.748	2.434	-0.978	-1.006	-1.573	0.086	-1.152	2.685	-0.683	-1.891	0.2	1.243	-0.98	0.195	-1.323	-0.736	0.423	1.739
GSM773555	0.137	1.367	1.326	0.801	1.416	2.873	2.208	1.318	0.686	1.015	-0.558	0.082	2.28	1.213	-1.439	2.018	-0.111	1.182	-0.483	-1.24	-1.68	0.772	2.016
GSM773556	0.324	0.934	-0.339	-1.314	0.352	1.281	1.104	-0.366	1.041	0.984	-1.358	-0.335	0.826	-1.82	-1.842	-0.723	0.43	-1.21	-2.377	-1.384	-0.608	-1.541	-0.52
GSM773557	0.17	1.305	1.778	0.529	0.877	1.425	1.032	-1.413	1.027	0.198	0.955	0.981	0.994	-0.461	-1.979	0.462	-0.454	-0.78	-0.969	-0.365	-0.971	0.503	-1.04
GSM773558	0.11	-0.843	0.675	-2.047	-0.923	-0.982	-2.122	0.525	0.102	0.701	1.185	1.484	-1.119	0.113	-0.998	1.623	-1.45	-2.135	-2.616	-0.499	-3.555	1.234	0.788
GSM773559	0.826	0.143	1.698	0.799	1.408	2.993	2.362	1.447	0.57	-0.352	0.409	-0.104	2.374	-0.164	0.052	0.9	-0.582	-1.14	-0.041	-0.382	-0.642	-0.832	1.221
GSM773560	0.336	3.799	-0.589	1.666	0.978	1.961	1.681	0.341	0.228	-1.395	-1.107	1.657	1.283	-0.903	-2.553	1.413	0.151	0.799	0.097	-0.38	-0.646	0.375	-0.318
GSM773562	0.437	1.623	0.619	1.146	1.226	2.476	1.892	-0.772	0.15	1.242	-1.081	1.159	1.734	-1.288	-1.713	1.398	-0.349	-1.335	-1.824	-0.679	-1.27	-0.907	0.839
GSM773563	-0.139	1.254	1.042	1.401	1.847	2.471	1.622	-1.084	-0.674	0.865	-0.615	-0.614	1.857	-0.103	-0.956	1.001	-0.279	-1.462	-1.344	-0.266	-1.736	1.249	1.152
GSM773565	-0.243	2.984	-0.935	-0.304	0.625	2.274	1.773	1.32	0.152	0.041	0.514	1.684	1.368	-0.593	-0.935	1.411	1.378	-1.217	-1.501	0.627	-0.508	0.374	-1.503
GSM773566	0.265	2.951	0.589	1.062	1.741	2.353	1.77	-1.145	-0.449	1.385	-0.491	0.37	1.795	-0.587	-1.808	1.687	-0.898	-0.206	-0.779	0.465	0.125	0.027	-2.18
GSM773568	-0.049	1.943	0.156	-1.231	1.428	0.785	-1.44	1.051	-0.523	-1.092	0.142	0.949	-0.748	0.196	-1.735	1.512	-0.895	0.021	-0.938	0.803	-0.428	0.733	0.324
GSM773570	0.274	0.467	-1.509	1.41	1.606	2.908	2.09	-1.238	1.147	-1.537	-0.203	2.482	2.082	-1.517	-2.554	2.541	0.067	-0.199	-0.355	-1.239	-0.551	0.795	0.767
GSM773571	0.359	2.508	0.547	-0.394	1.948	2.537	1.071	0.689	0.319	-0.371	0.974	0.849	1.571	-0.508	-0.988	2.123	-0.61	-0.041	-0.819	-0.753	-1.341	0.268	1.734
GSM773572	0.382	-0.064	0.606	1.007	0.662	2.686	2.32	-0.525	0.793	-0.93	-0.624	1.798	1.691	0.318	-0.382	2.585	-0.017	1.061	-0.112	1.133	-0.077	-1.046	1.587
GSM773573	0.747	2.743	-0.084	-0.23	-0.906	1.467	0.314	0.937	0.121	-0.517	0.062	0.325	-0.139	0.086	-0.148	1.71	-0.437	-3.125	-2.674	0.45	-1.283	0.262	1.994
GSM773574	-0.171	3.292	-0.819	0.792	1.755	2.412	1.258	1.504	0.431	-1.385	-0.291	1.085	1.335	-1.081	-1.81	1.36	-0.904	0.387	-0.459	-0.129	-1.236	-0.154	-2.469
GSM773575	0.523	1.443	0.118	0.225	0.99	2.552	1.85	0.913	0.077	0.757	-1.244	1.694	1.672	-1.795	-2.185	1.221	-0.761	-3.458	-2.127	0.405	-1.699	-0.28	-0.056
GSM773576	0.369	0.598	0.061	1.45	1.429	2.028	1.095	-0.538	0.706	-1.175	-0.539	1.282	1.054	-0.203	-2.786	2.88	-0.141	-1.612	-1.483	-0.289	-0.269	-0.423	0.872
GSM773577	0.015	1.247	0.002	1.606	1.965	2.322	1.091	-0.949	0.552	0.597	-1.067	1.518	1.308	-0.494	-1.012	2.044	0.32	1.115	-0.132	-1.554	-0.45	-0.359	-0.056
GSM773578	0.211	0.735	0.822	0.238	0.868	2.232	1.648	0.753	0.001	0.356	-1.174	-1.293	1.727	-2.496	-2.813	0.716	-1.231	0.007	-0.723	-0.789	-1.989	1.106	-0.774
GSM773579	0.318	1.46	-0.303	-0.692	0.534	1.109	0.943	0.803	-1.058	-1.278	-0.686	0.336	1.014	0.248	-0.732	-0.534	-1.171	-2.472	-2.351	-0.798	-1.458	-1.752	2.071
GSM773580	0.287	2.898	-1.759	1.453	1.546	2.281	1.716	-0.371	-0.378	0.827	0.878	-1.381	1.359	-0.521	-2.201	1.829	0.102	-1.29	-1.311	-1.004	-0.994	-1.118	-0.848
GSM773581	0.176	2.484	0.064	0.044	0.605	2.074	1.889	1.493	0.887	1.033	-0.594	-0.737	1.861	-0.175	-0.869	-0.096	-0.85	-0.206	-0.286	-1.149	-0.784	0.807	0.154
GSM773582	0.128	0.231	-0.37	-0.209	1.086	1.805	0.347	0.465	0.233	0.413	-1.101	0.892	0.826	-2.073	-2.697	0.62	-1.221	-0.495	-1.071	-0.556	-2.332	1.224	1.859
GSM773583	0.204	0.46	0.34	1.442	1.878	2.66	1.455	-0.761	0.758	1.19	-0.494	1.971	1.477	-0.982	-2.215	2.366	-0.075	-0.461	-1.208	1.253	-0.389	-0.289	1.318
GSM773584	-0.028	1.237	-0.908	0.819	0.758	0.195	-1.015	0.508	-1.83	-1.385	-0.553	0.2	-0.826	-0.576	-1.229	-0.728	-1.13	-1.131	-1.349	-0.779	-1.025	0.83	-1.547
GSM773585	0.1	3.534	-0.814	-0.194	2.029	2.497	0.894	0.8	0.387	-1.174	0.299	0.958	1.266	-1.035	-1.77	1.491	-0.44	-0.068	-0.644	-0.922	-1.423	-1.428	1.764
GSM773586	0.652	1.08	0.824	-0.83	0.293	2.724	2.073	-0.414	0.137	-1.292	-0.251	1.347	2.143	0.65	-1.034	1.932	1.355	-2.712	-2.197	-1.003	-1.088	1.722	-0.007
GSM773587	0.098	2.11	-0.663	-0.396	1.046	1.192	-0.125	1.431	-0.325	1.11	-1.192	3.022	-0.199	-0.862	-1.241	1.402	1.235	-1.429	-0.04	0.434	-0.706	-0.787	1.136
GSM773588	0.263	2.307	-0.138	1.729	1.411	2.221	2.091	0.21	-1.236	-1.138	-0.6	-0.434	1.88	-0.932	-1.134	1.423	-0.437	-1.14	-1.557	-0.689	-0.341	0.182	0.353
GSM773589	0.494	0.148	0.162	0.809	1.512	2.241	1.966	-1.453	0.742	-0.934	-0.147	2.851	1.773	-0.736	-1.293	0.65	-0.533	-1.692	-0.859	0.371	-0.289	1.654	-0.286
GSM773692	0.336	2.342	0.18	0.696	1.919	0.925	-0.901	1.813	-1.159	-0.17	0.848	1.216	-0.015	-0.904	-1.532	1.295	-0.47	-0.097	-0.427	-0.123	-1.348	0.344	-0.044
GSM773694	-0.083	-0.08	1.199	2.117	1.833	2.477	1.987	-0.414	-0.518	-1.216	-0.571	-0.117	1.929	-1.525	-1.778	1.645	0.642	-0.668	-1.37	-0.807	-0.059	-2.013	1.123
GSM773697	-0.476	-0.794	0.31	-0.902	1.145	0.453	0.169	0.263	0.1	0.687	-0.618	0.752	-1.211	-0.513	-0.398	0.769	-1.432	-1.586	-2.077	-1.921	-1.551	-0.975	-0.838
GSM773700	0.336	1.441	-1.307	1.518	1.732	2.457	2.138	-0.788	1.167	-0.948	-0.278	-1.137	2.078	-1.945	-2.456	1.04	-0.101	0.121	-0.694	-1.199	-1.63	-0.185	0.823
GSM773702	-0.46	1.364	-0.57	0.546	0.633	-0.061	-1.014	0.728	-0.903	1.151	-0.775	0.19	-0.468	-3.078	-3.011	-1.153	-1.722	1.08	-0.512	-0.161	-0.773	-0.277	1.676
GSM773703	0.526	1.096	-0.1	0.905	1.591	1.925	1.885	-1.55	-1.445	-1.007	-0.275	-0.795	1.733	-0.818	-1.275	0.845	-0.213	-1.934	-2.033	-1.029	-1.421	1.245	0.588
GSM773715	0.001	1.315	-0.121	-0.69	1.383	2.541	1.688	0.059	-1.141	1.034	-0.537	-0.651	2.062	-2.89	-2.64	-0.849	0.348	-0.66	-1.578	-0.837	-0.522	0.2	0.135
GSM773716	0.396	2.991	1.477	0.497	1.48	2.253	1.84	-1.209	1.198	-0.659	0.213	1.505	1.893	0.954	-0.865	0.492	-1.451	-0.45	1.131	-0.299	-0.747	-2.053	1.297
GSM773717	0.061	2.009	-0.85	1.373	1.452	2.243	2.158	-0.872	-0.43	1.212	-0.918	-0.407	1.745	-0.392	-1.048	1.08	0.12	0.008	-0.691	-0.687	-0.823	-0.806	-0.453
GSM773718	0.184	2.785	-0.374	1.589	2.184	2.181	1.297	-0.653	-0.383	1.006	-0.601	0.416	1.566	-1.968	-2.36	1.811	-0.799	0.509	-0.281	-1.558	-0.567	1.674	0.702
GSM773720	0.019	2.585	0.563	-1.212	1.034	1.866	0.823	0.561	1.143	-0.699	0.348	-0.495	1.274	-1.942	-1.923	0.471	-1.637	-0.821	-0.386	-1.26	-1.012	0.409	1.766
GSM773722	-0.318	0.809	0.619	-0.818	1.896	0.759	1.367	0.972	0.602	0.486	-0.323	-1.33	-0.225	-1.694	-1.498	0.228	-1.181	-0.225	-1.613	-0.843	-1.081	0.623	0.643
GSM773723	-0.035	0.059	-2.201	1.246	1.934	2.885	1.727	-1.106	0.214	-0.911	0.016	1.112	1.79	0.147	-1.967	2.144	-0.559	-1.155	0.541	0.175	0.34	0.342	0.768
GSM773724	-0.141	2.918	1.669	1.278	2.359	2.988	1.717	-1.439	0.089	1.315	-0.186	-0.604	2.089	-1.44	-2.481	1.634	-0.551	0.044	-0.892	-1.379	-0.516	0.539	0.243
GSM773725	0.295	0.367	-1.196	1.484	2.156	2.469	1.971	-1.204	1.048	0.348	-0.94	0.241	2.244	-2.358	-2.323	0.284	-0.392	0.652	-0.536	-0.664	-1.212	0.345	-1.132
GSM773727	0.133	3.089	0.185	-0.887	1.428	1.756	0.226	1.028	-0.773	-0.77	0.185	-1.395	0.665	-2.515	-2.164	0.598	-0.316	-1.176	-1.401	-0.758	-0.548	0.076	-0.99
GSM773729	0.381	2.084	0.64	-0.227	1.69	1.461	0.498	1.288	0.288	1.444	-0.073	0.884	1.022	-0.999	-0.867	-0.605	-0.138	-0.621	-1.512	-0.493	-0.915	-0.664	0.537
GSM773730	0.195	1.102	-0.444	0.485	1.692	1.866	1.386	1.407	0.317	-1.01	0.343	-0.873	1.77	-1.061	-1.261	0.266	-1.383	-0.342	-0.805	-0.81	-1.442	-0.718	-0.057
GSM773736	-0.467	1.472	0.684	0.123	1.562	0.34	-0.622	1.106	-0.107	-0.487	0.123	-0.896	-0.172	-2.943	-2.443	-0.199	1.151	0.535	-0.061	-0.916	-1.331	-0.179	-0.897
GSM773740	0.019	1.764	0.191	0.493	1.665	1.315	0.117	-1.548	1.07	0.29	-1.343	-1.259	0.353	-1.391	-1.589	-0.033	-1.345	0.299	-0.291	-0.976	-1.908	-0.9	1.776
GSM773741	0.179	1.024	1.014	-0.742	0.875	1.038	0.691	1.113	0.045	0.688	-1.364	-1.569	0.598	-0.811	-2.429	-0.736	-0.586	-1.088	-1.807	-1.529	-0.443	-0.036	-1.293
GSM773742	0.064	1.033	0.436	-1.433	0.064	1.069	0.337	1.03	-0.637	-0.004	0.291	0.474	0.066	-0.643	-1.184	-0.439	-0.095	-0.437	-0.602	-0.633	-1.747	-0.607	1.284
GSM773743	-0.367	1.216	0.637	-0.639	0.839	0.211	-1.118	1.284	0.624	-0.164	0.421	-1.432	-0.716	-1.375	-1.866	0.243	0.142	0.361	-0.222	-0.547	-1.497	-0.752	0.638
GSM773745	0.124	2.925	-0.656	0.699	1.778	2.061	2.004	1.393	-0.301	0.703	-0.967	-0.972	2.006	-0.437	-1.147	0.101	-0.907	-0.599	-1.513	-1.269	-0.66	-2.241	1.958
GSM773749	0.039	2.669	1.643	0.735	1.837	2.673	1.989	-1.375	-1.365	-1.657	-0.478	1.056	2.14	-1.172	-2.126	0.294	-1.215	-1.268	-2.155	-1.092	-0.734	0.366	2.498
GSM773751	-0.151	2.401	1.44	-0.081	1.2	1.226	0.476	1.195	-0.906	-0.434	0.668	0.601	0.607	-2.537	-2.527	0.192	1.477	1.002	0.142	-0.616	-2.221	0.519	1.531
GSM773754	-0.103	1.91	1.774	1.196	1.737	1.879	1.263	-1.014	-0.097	1.056	-1.22	-0.351	1.201	-1.316	-1.812	1.546	-0.295	0.811	0.039	-0.582	-0.622	0.681	-0.402
GSM773756	0.401	2.556	0.66	1.662	1.46	2.541	2.034	-0.462	0.388	0.996	-1.019	-0.319	1.723	-0.63	-1.162	2.504	0.388	0.245	-0.233	-1.22	0.055	0.257	0.001
GSM773764	0.143	2.317	-1.183	1.763	2.293	2.833	2.463	-1.382	1.208	0.213	-0.681	-0.302	2.686	-1.601	-1.961	0.547	0.112	-0.513	-1.396	-0.995	-0.667	0.874	0.739
GSM773590	0.205	2.843	0.483	1.341	1.895	3.08	2.319	-1.68	0.252	0.713	-0.694	0.604	2.434	-1.357	-2.811	2.035	0.017	-0.239	-1.455	-0.679	-0.239	2.014	0.932
GSM773591	0.267	0.346	-0.718	-1.068	0.425	2.394	1.653	1.191	-0.009	-0.736	-0.128	0.814	1.39	-0.502	-1.353	1.493	0.101	-1.945	-2.22	0.27	-0.927	0.474	2.377
GSM773592	-0.022	-0.478	1.01	1.38	0.702	1.23	-0.688	-0.364	0.032	0.214	-1.091	-0.051	-0.107	-0.69	-2.249	0.95	-0.286	-1.798	-2.307	-0.227	-1.417	-0.996	-0.673
GSM773593	-0.184	2.25	-0.063	0.463	1.89	2.439	1.043	1.614	0.797	0.982	-0.827	1.554	1.283	-1.314	-2.103	1.405	1.07	0.388	-0.998	0.457	-1.2	-0.162	-2.185
GSM773597	0.282	2.258	-0.025	-0.761	0.74	1.495	0.717	1.189	1.294	0.883	-0.804	0.767	0.961	-2.33	-2.152	0.266	-0.418	-0.097	-0.997	-0.512	0.053	-1.415	-0.395
GSM773598	-0.284	0.538	-0.265	0.549	0.075	0.831	0.237	0.694	0.211	-0.168	-0.429	-1.492	-0.038	-2.379	-2.709	-0.819	-0.268	-3.008	-3.311	-0.835	-1.589	-0.98	0.015
GSM773599	0.356	2.065	-0.316	-0.062	-0.473	1.931	1.217	-1.245	-0.012	0.976	0.215	0.123	0.488	-1.033	-1.892	1.741	-0.223	-1.474	-1.784	0.556	-0.922	1.046	-0.023
GSM773600	0.412	-0.047	-2.034	-0.241	0.227	2.487	2.447	0.597	-1.237	-0.959	-0.288	-0.11	2.118	1.185	-0.864	0.699	-0.433	-1.751	-1.805	-1.303	-0.474	-2.164	0.663
GSM773601	0.656	-0.541	-1.74	0.962	-0.754	1.506	1.775	0.138	0.218	-0.614	-0.525	-0.139	1.141	-1.913	-1.086	-0.266	1.093	-1.809	-2.83	-0.402	-0.857	-0.798	1.837
GSM773603	0.519	1.439	-0.438	-0.566	0.841	1.039	0.918	0.792	0.246	-1.43	-1.258	0.11	0.425	-0.223	-1.201	0.941	1.042	-3.526	-1.531	0.043	-1.126	1.032	0.76
GSM773604	0.415	0.054	0.163	0.907	0.907	2.689	2.057	-0.995	0.442	-1.137	-0.571	2.744	1.597	0.133	-1.001	2.152	-0.008	0.175	-0.544	-0.298	-0.864	-1.58	1.952
GSM773605	0.317	1.806	0.691	1.786	1.545	1.285	-0.324	-0.547	1.089	-0.329	0.287	2.444	-0.092	0.154	-1.428	2.639	0.569	-0.072	-0.717	-0.433	-1.18	0.545	0.29
GSM773610	0.199	2.025	0.515	0.768	1.874	2.568	2.134	-1.44	1.239	0.877	-0.304	0.222	2.261	-1.448	-2.269	0.81	-1.214	-0.417	-1.315	-0.58	-0.195	-0.906	-0.935
GSM773613	0.256	0.234	-0.226	1.234	1.509	2.999	2.437	-1.154	0.286	0.586	0.879	1.706	2.07	0.188	-0.776	1.806	-0.073	-0.343	-0.641	-0.072	-0.228	-1.788	1.906
GSM773616	0.089	1.244	-0.689	-0.537	0.16	2.301	2.177	0.599	-1.301	-1.374	0.942	-1.412	1.67	-0.869	-1.489	0.2	-0.966	-1.444	-1.743	0.616	-1.003	-0.379	2.343
GSM773617	-0.151	2.839	-0.216	1.005	1.775	2.149	0.882	-1.736	-0.341	-0.936	0.332	1.529	1.394	-2.115	-1.795	1.644	-0.457	-1.872	-2.151	-0.743	-0.787	-0.797	2.396
GSM773621	0.509	2.313	-2.449	0.357	-0.211	1.877	1.787	-0.74	0.929	-0.625	-0.089	0.725	1.423	0.296	-0.022	0.765	-0.304	-1.351	-1.683	-0.711	-0.641	0.328	1.851
GSM773626	0.216	1.101	1.117	1.049	1.994	1.999	1.657	-1.127	0.104	-0.724	0.312	-1.429	1.89	-2.223	-3.034	0.475	-0.887	-1.07	-1.46	-0.704	-0.408	-0.887	0.457
GSM773627	-0.703	1.785	0.047	0.13	2.018	1.066	-0.062	1.208	0.399	-1.599	-0.168	-0.134	0.551	-2.458	-2.732	-0.163	0.528	0.292	-0.845	-0.908	-0.503	-1.351	1.81
GSM773628	0.18	0.101	0.194	0.477	-0.284	1.597	0.727	0.386	0.074	0.824	-1.239	-0.571	0.525	0.589	-1.261	1.135	-1.206	-0.821	-1.564	-0.411	-1.555	-0.805	-0.723
GSM773630	0.021	2.199	-0.363	0.573	0.896	2.816	2.659	1.023	1.004	-1.024	0.607	0.856	2.59	-0.712	-2.274	0.065	-0.328	-1.989	-1.849	0.596	-1.523	0.765	2.122
GSM773633	0.511	1.367	1.572	1.14	1.45	2.182	2.176	-1.422	1.167	-1.133	-0.019	0.492	2.107	-0.628	-1.715	0.339	-0.454	-1.636	-1.243	-0.55	-1.179	1.363	0.574
GSM773636	0.074	0.617	0.089	-0.664	0.22	1.954	1.242	0.762	-0.011	0.619	0.984	1.01	0.867	-1.797	-2.514	0.939	-1.196	-0.184	-1.489	-1.097	-2.177	1.024	0.036
GSM773639	-0.678	0.096	0.534	0.303	1.473	1.462	-0.267	1.086	0.104	1.09	-0.383	0.683	0.329	-1.791	-2.299	1.275	-0.999	-1.125	-2.173	-1.418	-1.793	-0.229	-0.018
GSM773640	0.015	2.133	1.019	0.893	1.199	1.034	-0.335	-0.343	-0.418	-1.059	-0.239	0.257	-0.208	-0.604	-0.782	1.778	-1.584	0.075	0.036	-0.801	-0.686	0.913	1.603
GSM773641	-0.207	1.247	-0.128	-0.215	0.751	0.509	0.366	0.45	-0.945	0.187	1.095	-0.963	0.529	-1.432	-1.542	-0.874	-1.337	-1.279	-2.043	-0.787	-1.468	1.101	2.064
GSM773643	0.482	1.777	0.59	0.814	1.121	2.611	2.094	-0.924	-0.208	0.509	0.757	-0.095	1.7	-0.899	-1.517	1.461	-0.247	-1.71	-1.937	-0.367	-0.921	0.441	-0.49
GSM773644	0.061	0.549	-0.063	0.476	1.998	3.233	2.725	1.657	-0.449	0.845	-0.407	0.775	2.865	-1.314	-2.195	1.557	0.73	-2.174	-2.078	-0.557	-0.612	-1.107	0.559
GSM773645	0.106	-0.067	0.396	-0.445	1.193	1.01	-0.054	-0.053	0.703	0.898	-0.883	1.525	0.445	-1.697	-2.113	-1.221	-1.36	-2.417	-2.511	-1.307	-1.67	-0.993	-0.448
GSM773646	0.145	0.232	-1.446	1.57	2.14	2.928	2.237	-1.521	-0.492	-1.164	0.245	-0.227	2.611	-0.414	-1.17	1.815	-0.342	-0.441	-1.115	-0.606	-0.884	0.506	-0.1
GSM773647	0.457	3.251	0.713	1.617	2.194	2.711	2.255	-1.291	1.228	-1.163	0.62	-1.221	2.556	-2.105	-1.985	0.545	-0.552	-0.37	-0.882	-0.603	0.581	0.316	0.037
GSM773649	0.065	0.362	-0.206	0.766	1.731	2.761	1.526	-1.166	0.902	-0.713	0.566	1.847	1.713	-0.406	-1.295	2.145	-0.764	0.456	-0.178	0.789	-0.86	1.645	-1.14
GSM773650	0.085	0.825	0.472	-1.464	0.216	0.696	0.703	0.993	0.11	0.407	1.03	-1.558	0.334	-2.083	-2.348	-0.585	-0.688	-2.128	-2.176	-1.354	-2.04	0.144	0.529
GSM773651	0.064	-0.557	0.798	0.729	0.979	0.848	-0.033	-1.41	-0.134	-1.269	0.269	1.228	0.793	-1.069	-1.764	-0.447	-0.689	-3.051	-2.82	-1.556	-1.837	-2.134	-2.593
GSM773655	-0.062	1.279	-0.16	0.738	1.809	1.874	-0.001	0.553	-0.102	0.651	-0.244	-0.801	0.736	-1.715	-2.417	1.243	-0.18	-1.184	-1.976	-2.448	-2.123	-0.358	1.49
GSM773656	0.558	2.068	0.082	1.701	1.971	2.457	1.638	-0.491	-0.799	-0.151	0.863	-0.687	2.047	0.257	-1.961	1.765	-0.535	0.499	0.014	-0.849	-1.048	0.722	0.199
GSM773658	0.429	1.88	1.159	-1.186	0.434	2.755	2.056	0.41	-0.076	-0.786	0.364	1.617	2.233	-0.373	-2.026	0.753	0.056	-1.881	-1.977	-0.536	-1.652	0.697	2.05
GSM773659	0.547	1.621	-0.659	-0.168	1.144	2.139	0.785	1.28	0.023	-0.592	0.281	2.731	0.857	-1.479	-0.551	1.097	1.085	-0.783	0.576	0.374	-2.534	-0.246	1.699
GSM773660	0.303	2.291	0.029	0.062	1.906	2.135	0.957	0.48	-0.725	-1.39	0.346	-0.323	1.533	-0.682	-0.688	0.026	0.622	0.785	-0.812	-0.879	-0.24	0.561	2.244
GSM773661	0.054	2.821	0.632	0.342	1.566	2.71	1.933	1.197	0.033	1.427	-0.418	-0.694	2.001	0.243	-0.703	1.415	-1.208	-0.35	-1.126	-0.594	0.255	0.409	1.731
GSM773665	0.483	1.069	0.286	0.578	1.255	3.083	2.604	1.306	0.312	-0.769	-0.649	1.436	2.271	1.146	-1.009	2.221	-0.126	-1.245	-0.448	1.074	-0.044	-0.141	0.2
GSM773666	0.021	1.076	0.892	0.634	2.067	2.368	1.353	0.909	-0.35	0.306	-0.59	-0.39	1.939	-2.303	-2.438	1.627	1.076	-0.768	-1.415	-0.064	-0.732	-1.658	0.695
GSM773669	0.599	3.044	-0.944	2.028	2.203	2.832	1.712	-0.44	1.05	-1.208	0.026	1.873	1.873	-1.491	-2.08	2.332	0.125	-0.147	-0.645	0.461	-0.826	0.003	-0.891
GSM773672	0.309	1.672	0.519	1.63	2.334	2.548	2.168	-1.117	0.857	-1.732	-0.066	-0.873	2.391	-1.395	-1.523	0.518	-0.407	-0.682	-1.455	-1.233	-1.267	-1.137	-0.285
GSM773673	-0.191	-0.091	-0.744	-1.08	1.106	0.837	-0.983	0.814	-0.449	-1.535	-0.595	0.484	-0.586	-1.491	-1.481	0.847	-0.081	-1.764	-2.556	-0.548	-1.311	-0.851	2.265
GSM773674	0.827	0.902	1.07	1.37	1.159	2.758	2.019	-0.387	0.647	-1.243	-0.835	2.073	1.669	0.677	-1.441	2.393	0.114	-0.661	-1.094	0.103	-0.535	-0.938	2.475
GSM773675	-0.097	3.849	0.371	1.247	1.243	0.269	-0.941	0.298	0.414	-1.441	-0.081	-1.388	-0.543	-1.705	-2.327	-0.159	-1.258	-0.276	-0.924	0.05	-0.645	-0.217	-0.836
GSM773676	0.405	2.956	0.417	0.667	2.294	2.236	0.994	-1.437	-1.136	1.26	0.031	0.505	1.654	-0.423	-1.053	0.754	0.764	-1.066	-0.112	-0.934	-1.408	-0.545	-0.224
GSM773677	0.38	0.789	0.775	1.813	2.352	3.112	2.555	-0.971	-0.364	-0.744	0.384	0.412	2.69	0.001	-2.059	1.514	-0.102	-0.762	-0.768	0.135	0.008	-1.859	0.903
GSM773678	0.41	1.068	0.758	1.055	2.087	2.112	1.595	-1.094	0.764	-1.072	0.301	1.188	1.799	-0.735	-1.497	0.597	-0.887	-1.003	-1.296	-0.991	-1.325	-0.318	1.835
GSM773679	0.581	0.026	0.533	1.654	2.069	2.903	2.545	-0.575	1.01	-0.482	0.419	-0.204	2.577	-0.433	-1.226	1.319	-0.218	-1.108	-1.568	-0.599	-0.263	0.664	1.657
GSM773683	-0.425	-0.337	1.687	-0.074	0.7	-0.202	-0.379	-0.564	-0.478	0.301	-1.021	0.661	1.071	-1.462	-1.77	0.823	-0.019	1.052	-0.13	-0.359	-1.876	0.019	1.549
GSM1672296	0.442	-1.261	-1.299	-0.032	0.661	-0.021	0.858	1.257	-1.827	1.016	0.847	0.957	0.666	-0.544	0.052	1.011	-0.926	-2.557	-2.983	-1.975	0.144	-1.459	0.425
GSM1672297	0.94	0.071	-1.765	0.327	-1.458	0.471	0.441	-0.568	1.301	-0.201	-0.999	0.702	-0.126	-0.435	-1.1	0.38	-0.818	-0.367	-1.452	-2.461	0.535	0.432	1.264
GSM1672299	1.205	0.462	-0.228	0.172	-1.354	1.195	1.593	0.456	-2.937	-0.758	-0.885	2.748	1.033	-1.107	-1.533	-0.215	-0.157	0.314	-0.788	-0.463	1.562	1.099	2.545
GSM1672302	0.352	1.192	-1.94	-0.306	-1.621	-0.752	-0.121	-0.381	-0.485	-0.472	-0.486	2.968	-0.45	-0.708	-0.83	-0.911	0.846	-2.988	-2.76	0.147	0.757	-0.016	1.014
GSM1672303	0.965	1.71	-1.556	-1.234	-0.368	0.687	-1.353	-0.715	-0.141	1.038	0.045	-0.669	0.809	-1.234	0.041	1.28	-1.378	0.233	-1.872	-0.664	0.594	0.886	-0.348
GSM1672304	0.861	1.208	1.381	1.827	0.807	2.47	2.317	0.802	-1.82	-0.6	0.35	-0.318	2.241	-1.17	-0.72	1.084	-0.353	-1.314	-2.74	-1.416	1.562	0.319	2.875
GSM1672305	0.59	-1.286	-1.134	-0.161	0.448	-1.201	0.599	-0.466	-0.657	-0.918	-1.28	0.221	0.491	0.16	-0.887	1.948	-1.158	-1.669	-3.102	-1.582	-0.355	-1.578	0.462
GSM1672306	0.856	1.503	-0.861	0.658	-0.444	1.716	1.285	1.12	-0.537	-0.421	-0.313	0.954	1.087	0.386	-0.449	1.463	-0.245	1.171	-0.143	-0.912	0.885	0.737	2.262
GSM1672307	0.547	0.413	-1.999	0.107	-1.298	0.04	1.013	0.911	-1.294	-0.006	-0.105	0.219	0.5	-1.033	-1.099	-1.166	-0.643	-1.966	-3.175	-1.363	0.349	-0.678	-0.538
GSM1672308	0.682	1.191	-1.346	0.325	0.224	1.311	0.35	-1.097	1.162	-0.835	0.459	0.537	1.06	-0.33	-1.647	0.447	0.556	-1.39	-2.807	-2.107	0.838	-0.742	-0.108
GSM1672309	0.697	-0.513	-1.917	-1.412	-0.99	-1.088	0.227	-1.083	-0.065	-0.531	-1.124	0.116	0.012	-1.455	-0.826	0.993	-0.322	-0.02	-1.588	-0.451	0.889	-0.56	0.916
GSM1672310	0.566	-0.578	-0.543	-0.606	1.1	-0.32	-1.067	0.448	-0.755	-0.853	-1.232	1.942	-1.232	-0.728	-1.007	0.055	-0.049	-2.647	-2.474	-1.782	-0.694	0.857	-1.905
GSM1672311	1.062	1.402	0.19	2.749	1.588	3.56	2.09	1.809	0.246	0.053	1.059	-1.619	2.01	0.394	0.103	2.138	-0.038	-0.582	-1.533	-1.946	1.912	-0.798	2.819
GSM1672313	0.414	-0.45	-0.873	-1.192	1.087	-0.724	-0.207	0.515	-2.023	-0.412	0.464	-0.481	-0.345	0.015	-0.179	-1.214	0.562	-2.528	-2.24	-0.946	-0.352	-0.348	0.614
GSM1672314	0.976	3.265	1.627	2.197	1.28	2.551	1.814	0.775	-0.374	0.116	0.507	2.718	1.689	0.906	0.439	1.916	-0.13	1.148	-0.475	-0.624	1.179	1.644	1.139
GSM1672315	0.178	0.066	-0.875	1.044	0.723	0.716	0.397	0.239	-0.509	-1.292	-1.164	-1.161	-0.022	-1.11	-0.998	1.369	0.701	-3.127	-2.174	-1.661	0.54	0.887	-1.254
GSM1672317	0.933	-0.92	-1.334	0.734	-0.2	1.395	1.13	-0.516	-0.548	-0.51	-0.395	0.547	0.69	-1.226	-1.138	0.42	-0.915	-0.387	-0.932	-2.191	0.76	1.443	1.152
GSM1672318	1.028	-0.176	-1.639	0.136	-1.026	0.446	-0.174	-0.248	-0.599	-0.175	-0.066	1.381	-0.27	0.144	-0.089	0.908	-1.381	-2.929	-3.164	-0.289	0.296	0.359	-2.158
GSM1672323	0.509	2.108	0.088	1.103	0.005	1.232	1.596	-0.776	-1.517	-0.212	-0.39	-0.012	1.247	-0.377	-1.014	-0.005	-0.249	-1.994	-2.668	-1.686	1.076	-0.345	-0.454
GSM1672324	0.687	0.053	-1.334	0.363	-0.399	1.326	1.019	-1.134	-0.273	0.047	-0.484	1.567	0.249	0.575	-0.832	1.777	-1.345	0.494	-0.639	-1.616	1.139	-0.036	2.144
GSM1672329	-0.15	0.467	-0.985	0.522	1.501	-0.536	0.65	-0.947	0.885	-1.13	0.147	1.13	-0.842	-1.174	-0.719	0.073	-1.286	0.062	-1.365	-1.584	1.088	0.776	0.592
GSM1672331	0.542	0.37	-1.442	1.787	0.844	1.637	-0.082	0.107	0.142	-0.603	0.563	0.978	0.501	-0.054	-0.908	1.912	-0.366	-1.464	-2.247	-1.326	0.107	0.251	0.445
GSM1672332	0.811	2.614	-1.545	0.772	0.01	-0.432	-0.299	0.087	1.159	-0.176	-0.143	2.705	-0.483	-1.125	0.312	0.542	-0.388	-1.412	-2.265	-1.269	0.716	-1.658	0.03
GSM1672334	1.132	1.733	-1.199	0.441	-0.479	-0.664	-0.395	-0.574	-1.839	-0.752	-0.694	1.282	-0.338	-0.334	-0.243	-0.915	-1.183	-0.284	-1.366	-0.943	0.626	1.11	-1.009
GSM1672336	0.978	0.636	-1.101	1.508	1.449	2.061	0.561	-0.675	-0.944	-0.246	0.701	2.21	1.1	0.491	-0.135	0.732	-0.645	0.414	-0.276	0.718	0.302	-0.647	-1.699
GSM1672338	1.049	3.105	1.895	0.575	-0.721	3.216	2.476	0.455	-0.602	-0.443	0.31	-0.859	2.173	-0.415	0.02	0.792	0.103	0.826	-0.23	-0.705	1.636	1.589	1.279
GSM1672340	0.443	-0.221	-1.395	0.923	-0.157	-0.574	-1.144	0.775	-0.552	-0.305	-0.961	1.633	-1.358	-1.28	-0.517	1.045	-0.461	-0.521	-1.476	-0.698	0.596	-0.321	-0.265
GSM1672341	1.029	0.851	-0.456	0.971	-0.556	1.671	0.65	-0.008	-0.025	-0.176	0.401	3.212	0.782	-1.275	0.022	2.237	-0.896	-1.666	-2.455	-1.238	1.247	-1.067	-0.748
GSM1672342	0.84	2.519	-2.508	-0.433	0.64	-0.539	0.952	-0.39	-1.056	-0.316	0.735	2.029	-0.747	0.093	-1.505	-0.715	-0.834	0.278	-1.222	-1.448	0.27	-0.773	-0.152
GSM1672345	1.049	0.956	-1.302	0.705	-0.951	0.693	0.122	-0.039	1.519	-0.034	-0.126	0.854	0.158	0.012	-0.979	0.76	-0.985	-1.668	-2.675	-0.413	1.272	0.26	0.381
GSM1672346	0.437	0.159	0.707	-1.682	0.061	-2.608	-0.916	0.3	-2.073	-1.251	-0.997	-1.18	-1.146	-1.25	-1.332	0.164	-1.539	-2.633	-3.681	-2.021	-0.207	0.909	-0.346
GSM1672348	1.023	0.408	-0.932	2.331	2.14	1.243	0.056	1.087	1.47	0.089	1.27	0.798	0.909	0.098	-1.041	0.716	1.198	0.024	-1.181	-0.57	0.655	1.348	2.632
GSM1672350	0.668	1.647	-2.228	1.857	1.321	2.299	1.347	-0.561	-1.282	-0.349	0.434	1.725	1.637	-0.425	-0.754	1.314	-0.078	-2.223	-3.04	-1.488	1.514	0.194	0.982
GSM1672353	0.448	-0.156	-1.668	-0.29	-1.211	-0.491	0.843	1.154	-1.718	0.596	0.924	-0.916	0.219	-0.126	-0.049	1.009	-1.436	-2.509	-3.274	-2.767	0.508	-0.761	1.741
GSM1672355	1.222	2.244	-1.416	2.509	1.496	2.543	1.049	1.074	-0.083	-0.012	0.9	2.401	1.496	-1.04	0.105	1.146	-0.524	-0.927	-2.076	-0.44	1.129	2.243	0.774
GSM1672356	0.212	0.983	-2.124	0.705	1.049	0.962	-0.458	0.052	-0.002	0.42	0.642	2.873	-0.211	-0.929	0.32	0.727	0.568	-3.109	-2.831	0.456	0.698	2.164	0.383
GSM1672362	-0.092	0.706	-0.693	-1.916	0.607	-0.483	-0.174	-1.351	-1.449	1.066	1.121	1.069	0.025	-0.376	1.059	0.981	-1.467	-3.193	-3.577	-1.124	0.302	-1.053	0.634
GSM1672364	0.765	0.144	-1.005	0.375	1.205	-0.06	0.943	-0.946	-0.537	-0.533	0.386	1.008	-0.959	-0.654	-1.506	0.549	1.386	0.318	-0.922	-1.295	0.326	0.96	-0.216
GSM1672367	0.774	2.68	-0.142	2.322	0.904	2.372	1.983	1.147	0.512	-0.161	-0.14	0.07	1.643	-0.236	-0.638	0.841	-0.353	-0.295	-1.134	-1.27	1.33	1.41	1.729
GSM1672368	0.707	-0.082	-1.779	0.316	0.977	-1.221	0.625	-0.368	0.809	0.146	-0.832	1.18	0.646	-0.275	-0.218	1.552	-1.836	-1.261	-0.178	-1.648	0.786	0.904	-0.969
GSM1672370	0.469	0.041	-1.072	0.804	0.749	-0.219	-1.011	-0.51	-0.912	1.262	0.763	0.352	-1.141	0.164	-1.012	0.569	1.317	-0.483	-1.222	-1.875	0.852	-0.103	-1.119
GSM1672375	0.6	0.598	-1.147	-0.36	-0.668	0.767	-0.761	-0.897	0.035	0.856	-0.715	-1.584	-0.225	-0.516	-0.377	1.194	0.948	-1.099	-2.058	-1.934	-0.327	1.035	-1.762
GSM1672376	0.932	0.69	2.007	0.543	-1.478	0.154	0.957	-0.815	-1.723	-1.064	-0.82	0.521	0.551	-0.518	-0.539	-0.479	-0.227	0.316	-0.798	-2.103	1.654	1.828	2.899
GSM1672377	-0.135	-0.618	-1.202	-1.171	0.535	-1.39	-0.391	0.021	-1.76	-0.18	-0.087	-2.107	-0.664	-0.632	-0.911	-0.1	-1.264	-2.69	-3.59	-2.028	-1.111	0.223	0.546
GSM1672378	0.352	0.099	-1.984	-0.156	-0.648	-1.362	0.369	-0.435	1.353	-0.063	-0.629	2.396	0.312	0.433	0.211	0.21	-0.713	-1.848	-1.858	-1.324	1.279	-0.33	-1.668
GSM1672380	0.603	0.831	-0.951	1.366	-0.107	0.296	-0.551	0.254	-0.147	-0.408	-0.522	3.687	-0.799	0.776	-0.822	1.463	-0.01	-1.521	-2.209	-0.9	1.037	2.399	1.71
GSM1672383	1.214	1.171	0.476	0.989	-0.115	2.331	1.723	-0.3	0.075	-0.172	-0.521	-0.155	1.101	-0.656	-1.177	2.193	-0.382	-1.34	-2.001	-1.608	1.24	-0.446	1.982
GSM1672385	0.418	-0.112	-1.863	2.111	0.705	1.599	0.772	0.835	0.149	0.967	-1.331	1.294	0.474	0.119	-0.186	2.041	-0.329	-2.144	-2.944	-1.478	-0.019	0.675	-2.074
GSM1672388	0.849	0.895	-1.436	0.868	0.11	2.308	0.95	-0.875	-0.193	-0.032	1.002	-1.062	1.227	0.188	-1.108	1.516	-0.71	-0.734	-1.886	-1.59	0.466	1.695	1.167
GSM1672390	0.793	-0.678	-1.865	-0.652	0.526	-0.496	-0.694	0.251	-1.274	1.024	0.045	-1.563	0.409	-1.119	-1.226	-0.61	0.503	-1.273	0.644	-1.872	0.012	1.73	0.48
GSM1672391	0.714	0.071	-0.627	1.284	0.116	0.219	-0.872	0.382	-0.639	-0.342	-0.604	0.445	-0.893	-0.724	-0.916	2.053	-0.289	-1.153	-2.605	-0.542	1.528	-0.094	-2.289
GSM1672392	0.973	1.793	-2.165	0.357	0.257	0.841	0.602	-0.79	-0.802	0.431	0.76	-1.334	1.028	-0.863	-1.041	-1.012	0.742	-2.465	-1.477	-1.721	0.33	1.376	2.324
GSM1672393	1.456	0.539	-1.41	1.19	0.499	0.103	0.847	-0.891	-1.657	-0.819	-0.942	0.021	0.524	-0.327	0.244	1.08	-0.714	-2.545	-2.353	-2.072	1.98	2.668	-1.243
GSM1672395	1.056	0.913	-1.998	0.799	-0.307	0.833	0.738	-0.104	-1.113	-0.002	-0.709	0.146	0.176	0.289	-0.235	1.276	-1.447	-3.255	-3.148	-1.837	0.308	-1.799	1.243
GSM1672397	0.933	1.813	-1.175	0.963	0.101	1.487	0.816	-1.063	-0.597	-0.227	-0.199	0.944	0.585	0.385	-0.484	1.452	-0.61	-1.072	-1.633	-1.763	1.612	1.027	-2.116
GSM1672399	0.532	-0.79	-0.973	1.498	0.955	2.44	0.454	-0.057	0.238	-0.484	1.126	-1.177	1.117	0.593	1.009	1.351	-1.127	1.035	-1.05	-1.706	-0.118	2.521	-0.282
GSM1672401	1.23	3.209	1.746	1.661	0.155	2.248	1.829	1.065	1.613	0.332	0.641	2.004	1.395	-0.328	-0.938	1.161	-0.354	-1.894	-2.392	-0.821	1.033	-1.947	1.167
GSM1672402	0.483	1.659	-1.679	1.047	0.734	2.394	0.976	-0.851	0.152	-0.704	0.527	-0.108	1.382	-0.803	-0.25	1.011	-1.009	-1.129	-2.242	-1.874	1.239	2.207	-0.224
GSM1672404	1.364	1.693	0.723	1.756	0.07	1.524	1.353	0.883	-0.679	-0.279	-0.735	2.431	0.496	0.087	1.095	1.405	-0.084	-2.828	-3.56	-0.697	0.986	-0.776	2.101
GSM1672408	1.37	0.178	-0.087	-0.273	-0.704	0.381	-0.613	-0.511	-1.158	-1.798	0.998	1.05	0.246	-1.39	-0.942	-1.458	-1.081	-2.361	-3.534	-2.433	0.594	2.23	0.714
GSM1672410	1.219	0.725	-0.129	1.992	1.213	0.739	1.233	0.385	-0.837	-0.561	-0.206	1.275	1.291	0.417	-0.066	0.316	-0.625	-2.064	-2.639	-0.232	1.599	1.897	1.986
GSM1672411	0.646	1.214	1.37	-0.539	0.96	0.669	1.69	0.728	-1.449	-0.324	-0.691	3.044	0.818	0.908	-1.563	1.195	-0.722	-2.628	-3.37	-0.831	1.735	0.279	2.387
GSM1672412	0.752	0.912	-1.211	2.467	1.51	2.352	0.534	1.715	0.47	0.236	1.223	3.312	1.096	-0.913	0.582	2.282	-0.593	-2.769	-2.685	-0.155	0.717	2.421	0.31
GSM1672413	0.543	1.367	0.012	0.679	0.74	0.871	-0.598	0.274	0.39	-0.563	-0.125	2.446	-0.306	0.025	-0.16	1.727	0.658	0.907	-0.817	1.121	1.426	0.377	0.303
GSM1672414	0.817	0.776	-1.761	1.64	-0.034	2.412	2.005	1.028	-0.503	-0.596	-1.126	2.545	1.267	0.841	0.759	1.985	-0.446	-2.43	-2.851	-0.416	0.56	1.078	1.151
GSM1672416	1.443	2.703	-1.676	1.729	0.099	1.442	0.644	1.191	0.091	-0.315	-1.058	1.833	-0.005	0.662	-0.74	2.572	-0.506	-2.122	-2.724	-0.856	0.736	-2.582	1.816
GSM1672417	1.301	0.79	1.783	1.341	-0.084	1.972	1.41	-0.066	1.918	-0.169	0.608	0.347	1.356	0.193	-0.496	0.562	-0.555	-2.12	-1.124	-1.778	1.233	0.103	-0.126
GSM1672418	1.386	0.964	-1.316	0.843	-0.709	-0.682	0.312	0.299	-0.298	-0.057	-0.79	0.81	-0.328	0.406	0.036	-0.722	-1.486	0.302	-0.482	-0.35	1.978	0.753	-2.27
GSM1672419	0.994	1.933	-0.308	1.948	1.156	2.82	1.65	0.318	-0.068	0.615	0.486	-0.933	1.56	-0.916	-1.234	1.906	-0.407	0.98	-0.272	-1.534	1.15	1.404	0.729
GSM1672421	0.493	1.655	-2.159	-1.002	0.869	-1.108	-0.845	-0.122	0.728	-0.761	-0.987	1.362	-1.213	-0.16	-0.465	0.198	0.439	-0.114	-1.362	-1.254	0.254	-0.064	1.239
GSM1672422	1.113	1.053	-3.481	-0.036	0.058	0.303	0.731	0.425	0.911	-0.368	-1.221	0.621	-0.174	-0.507	0.428	0.824	-0.29	-2.423	-3.07	-1.617	1.605	1.038	0.665
GSM1672426	0.681	-0.055	-0.864	0.605	-1.371	0.106	0.874	0.513	-2.066	-0.845	-0.841	-0.82	0.589	-0.909	-0.21	-1.306	-1.108	-0.78	-1.708	-0.264	-0.298	1.9	0.292
GSM1672432	1.025	0.612	-0.553	-0.174	0.077	-1.064	-0.179	0.251	-0.94	0.518	-1.342	0.859	-0.783	-0.684	-0.479	-1.281	-0.536	-2.15	-3.432	-2.421	-0.384	1.362	0.77
GSM1672433	0.857	0.015	-1.487	0.613	0.901	0.145	-0.513	0.602	-0.107	-0.081	-1.011	1.171	-0.648	-0.074	-1.362	1.282	0.441	-0.496	-1.211	-2.443	-0.813	-1.104	0.464
GSM1672434	1.679	1	-0.555	-1.225	1.073	1.541	0.47	1.175	0.14	-1.33	1.01	3.308	0.169	-1.377	-1.027	0.911	0.837	-3.136	-3.538	-0.236	1.007	-0.411	1.535
GSM1672435	1.576	-0.268	-1.531	0.054	0.207	1.707	1.028	0.48	1.228	-0.805	0.259	-0.209	1.27	-0.469	0.916	-0.726	-1.61	-1.323	-0.991	-2.455	1.285	0.878	-0.872
GSM1672436	0.953	1.605	-2.965	-1.064	-0.194	-0.142	1.166	1.009	-1.084	-0.308	-0.035	-0.737	-0.995	-0.571	-1.254	0.194	0.423	-0.312	-1.181	-1.372	0.163	-0.717	1.606
GSM1672437	0.4	-0.411	-1.717	0.709	-1.499	0.509	0.11	0.155	-0.668	-1.207	0.786	-1.218	-0.432	-0.837	-1.047	0.816	-0.372	-2.974	-4.111	-2.218	0.706	-0.706	1.773
GSM1672438	0.544	-0.824	-1.822	1.186	-0.479	0.643	0.519	0.267	-1.205	-0.273	-0.944	0.016	-0.139	-0.343	0.192	1.174	-0.659	-2.744	-3.27	-1.326	0.318	0.311	2.534
GSM1672439	0.227	1.942	-1.053	-0.155	-1.504	-0.625	-1.65	-1.131	-1.14	-0.55	-1.282	2.394	-1.955	-0.227	0.002	0.338	-1.09	-2.711	-2.653	-1.135	0.602	2.495	0.732
GSM1672440	0.712	1.194	-1.168	-0.794	1.409	-0.536	0.64	0.371	-1.71	-0.767	1.034	0.688	0.545	-1.469	-1.032	0.915	0.662	-1.692	-1.756	-2.212	0.618	1.303	0.908
GSM1672442	1.194	1.139	0.558	1.711	0.182	1.611	0.852	0.77	-0.469	-0.306	-0.672	2.985	0.519	0.674	-0.745	1.389	-0.844	-2.354	-2.394	-0.898	2.089	0.949	1.428
GSM1672444	1.327	-0.141	-1.404	-1.148	-1.336	-0.619	0.542	-0.041	-0.895	1.178	0.787	-2.232	-0.024	1.244	-1.189	0.73	0.387	-3.513	-2.158	-2.087	1.046	1.212	1.414
GSM1672447	1.394	-0.786	-1.291	-0.438	-0.382	0.857	0.093	0.833	0.158	0.1	0.218	0.537	0.349	-1.651	-1.087	0.843	1.3	-0.429	-1.647	-2.248	-0.518	2.506	1.682
GSM1672449	1.438	2.762	0.733	2.734	0.63	0.804	-0.145	2.579	-0.118	0.044	-0.415	2.156	-0.392	-0.055	-0.459	2.202	0.125	-1.865	-2.485	-0.965	1.207	-0.472	0.329
GSM1672450	1.985	0.321	-0.597	1.302	-0.162	-0.288	0.854	0.078	-1.827	-0.472	-1.131	-1.36	0.05	0.286	-0.17	-0.599	-0.393	-2.899	-2.401	-1.97	1.404	1.067	1.162
GSM1672452	0.927	0.262	-0.323	-0.515	1.385	-0.488	0.417	-1.171	-0.086	-0.116	0.968	3.348	-1.16	-0.234	-0.63	1.329	-0.677	-1.199	-1.974	-0.366	-1.791	-1.393	0.928
GSM1672453	0.396	-0.491	-1.411	-0.62	0.752	0.841	-0.816	1.137	-0.866	0.063	0.771	1.748	-0.038	-0.008	-0.4	0.841	-0.952	-0.895	-1.614	-1.404	0.588	0.32	-1.306
GSM1672454	0.545	-0.122	-2.135	-0.393	-1.077	-0.906	0.912	0.441	1.536	-1.126	-0.777	1.334	1.103	-0.533	-0.065	-0.201	-1.198	-2.877	-3.672	1.096	0.594	1.092	0.55
GSM1672455	1.22	-0.555	-0.887	0.448	0.57	-0.188	-1.08	-0.371	-1.351	-1.519	-1.152	1.037	-1.217	-0.714	-0.912	-0.859	1.183	-3.076	-3.135	-1.931	0.033	-0.334	1.538
GSM1672456	1.165	1.482	-2.12	0.333	-1.313	1.011	0.882	-1.196	-1.298	-0.825	1.331	0.76	0.23	0.3	0.572	0.475	-0.663	-0.89	-1.854	-1.893	1.569	0.052	-1.015
GSM1672457	1.45	-0.277	-0.722	-1.291	1.05	0.291	-0.801	-0.776	-2.095	-0.721	-1.457	-0.582	-1.201	-0.465	-0.864	1.137	0.163	-1.074	-2.247	-1.939	1.131	2.969	0.171
GSM1672463	1.328	0.435	-1.274	0.425	-0.711	0.746	1.392	-1.16	-1.364	-0.03	0.713	0.707	1.299	0.658	0.06	-1.35	-0.603	-2.264	-2.723	-2.102	0.841	2.829	1.177
GSM1672467	1.001	0.849	-1.256	1.316	-0.098	-0.63	0.041	-0.019	-1.599	-0.912	-1.314	1.26	-0.413	-0.675	-1.034	-0.577	0.025	-1.299	-2.295	-1.758	0.716	2.113	0.074
GSM1672468	0.662	0.537	-0.843	-0.6	0.669	1.38	1.115	0.89	-2.237	0.531	-0.245	-0.049	-0.589	-1.105	-1.481	0.353	0.466	-1.156	-2.27	-2.23	0.9	0.207	0.493
GSM1672473	0.773	2.421	-1.482	-0.186	-0.843	-0.767	0.487	-0.445	-0.121	0.844	-0.975	4.006	0.325	0.763	-0.316	1.131	-1.124	-2.653	-2.762	1.307	0.293	-0.503	1.632
GSM1672475	0.154	-0.134	-1.781	-0.018	-0.549	0.38	0.1	0.981	1.348	-1.086	1.317	-0.496	-0.293	-0.712	-0.546	-0.34	1.277	-1.535	-1.957	-2.437	0.683	0.474	2.151
GSM1672477	0.397	-0.357	-0.79	-0.802	1.123	-1.437	-0.994	1.055	1.447	-0.129	0.041	0.773	-1.179	-1.228	-0.976	0.011	-0.807	-2.442	-3.322	-1.41	-0.089	0.741	0.524
GSM1672479	1.461	1.475	-1.002	1.345	0.535	3.654	2.212	-0.929	-0.168	-0.08	0.505	1.137	2.199	-0.558	-0.225	1.757	-0.215	-2.154	-2.561	0.285	1.343	-0.407	3.228
GSM1672483	0.984	0.674	-0.354	2.087	1.259	1.055	-0.246	0.395	-0.211	-0.972	-0.55	0.187	-0.034	-0.63	-1.018	1.71	-0.209	-2.13	-2.516	-1.705	1.064	-0.583	0.591
GSM1672486	0.927	-0.127	-0.805	0.189	0.14	0.453	-0.181	-0.977	-0.453	-0.743	-0.669	3.273	-0.839	-0.254	0.571	1.469	0.05	-2.53	-2.859	-0.629	-0.557	0.959	-1.587
GSM1672487	0.454	-1.063	-1.02	-0.792	0.046	-1.189	-1.398	0.324	-2.033	-1.397	-1.092	0.303	-0.056	-0.481	-0.806	0.466	1.276	0.756	0.927	-2.075	-0.058	0.593	0.365
GSM1672492	1.048	0.75	-1.845	0.884	-0.561	-0.868	0.175	0.171	-1.634	-0.169	-0.64	0.983	-0.157	-0.328	-1.221	-0.711	-1.044	-2.712	-2.972	-2.187	0.635	0.93	0.389
GSM1672493	1.089	0.951	-1.532	0.95	-0.263	0.672	-0.351	-0.58	-0.193	-0.375	-0.703	2.982	-0.441	0	0.198	1.106	-0.545	-1.342	-2.227	-2.691	0.649	-1.094	1.041
GSM1672494	0.783	0.008	-0.676	1.754	-0.398	0.967	0.636	1.191	-0.611	-1.408	0.935	-0.07	0.021	0.085	-0.768	1.409	-0.195	-2.359	-3.21	0.591	0.8	0.991	1.045
GSM1672499	0.767	-0.678	-2.132	0.026	-0.086	-1.389	-0.792	-1.354	-1.531	0.16	1.068	0.615	-0.514	-1.628	-0.865	-1.123	1.025	0.78	-0.612	-1.251	1.478	0.214	2.78
GSM1672500	1.003	0.585	-0.945	0.436	0.312	0.725	0.728	0.928	-1.449	-0.393	-0.196	0.453	1.032	-0.111	0.422	-1.035	-1.134	-2.649	-2.775	-2.365	1.88	2.574	0.438
GSM1672502	0.844	-0.494	-2.517	-0.335	1.373	0.708	0.545	-0.89	-0.597	-1.128	1.032	0.072	-0.001	-0.641	-0.036	0.792	1.187	-2.597	-2.982	-2.509	0.086	0.863	1.131
GSM1672503	0.356	-1.055	-2.181	-0.222	1.341	-0.126	0.879	0.609	-1.435	-1.178	0.105	-0.22	-0.7	-1.9	-0.983	-0.045	0.685	-1.704	-2.785	-2.522	-0.231	-3.271	-1.343
GSM1672510	1.129	3.975	1.218	1.077	-1.259	2.56	2.159	0.874	-0.237	-1.411	0.871	2.047	1.37	0.82	1.416	1.184	-0.342	-1.867	-2.175	1.478	0.871	2.164	1.57
GSM1672512	0.399	-0.634	-1.815	-1.09	-1.432	-0.959	-1.571	0.021	-0.054	-0.907	-0.734	1.015	-0.961	-1.247	-0.901	1.003	-1.729	-0.742	-2.156	-0.71	0.171	-0.529	0.631
GSM1672515	1.034	-0.29	-0.423	-0.691	-0.835	-0.899	-0.097	-1.131	-0.503	-1.1	0.034	0.812	1.133	-1.871	-0.516	1.101	-1.238	-2.324	-2.837	-2.326	-1.65	1.067	-0.09
GSM1672518	0.985	0.646	-1.196	0.033	0.412	0.32	-0.886	0.382	-0.376	-1.138	0.98	1.426	-0.173	0.147	0.213	0.569	-0.902	-1.254	-2.194	-2.355	1.702	-2.238	-0.794
GSM1672529	0.01	-0.84	-1.315	0.157	0.465	-0.607	-1.211	0.037	-1.663	0.449	0.625	-0.379	-0.58	1.357	0.302	-1.206	0.236	-1.132	-1.44	-2.469	0.986	-1.608	0.391
GSM1672534	0.919	1.03	-0.148	1.39	0.846	1.336	1.047	0.202	1.394	0.437	0.541	0.372	1.046	-1.466	-0.548	0.173	-1.152	0.657	0.235	-1.579	1.16	0.632	1.973
GSM1672537	0.809	-0.484	1.775	1.161	-0.502	1.232	0.611	1.304	-1.437	-0.051	0.868	-1.05	0.509	-0.489	-0.537	0.02	-1.237	-1.506	-1.186	0.912	1.296	2.551	0.82
GSM1672540	1.333	-0.621	-1.306	-0.489	-0.949	-0.374	-0.852	1.115	-1.382	0.117	-0.535	2.322	1.316	0.556	0.165	0.008	-0.682	-1.205	-1.994	-0.564	0.425	2.106	0.873
GSM1672543	0.629	1.3	0.957	1.222	1.302	1.233	-0.45	0.477	0.039	0.052	0.744	0.455	-0.059	0.541	1.67	1.429	0.973	0.747	-0.74	-1.828	0.204	2.908	1.267
GSM1672544	1.173	0.096	-0.823	-0.35	0.866	0.776	-0.262	-0.876	-0.166	0.193	-0.158	2.488	-0.564	1.082	0.497	1.795	-1.588	-1.52	-1.938	-1.206	0.22	1.135	1.361
GSM1672545	-0.358	1.547	-2.52	-0.181	1.685	-0.696	0.46	-0.374	-2.084	-0.296	0.243	0.142	0.666	-1.281	-1.046	-0.747	-0.714	-0.239	-2.124	-2.399	0.145	-1.775	2.269
GSM1672546	0.87	0.434	-1.73	-0.579	-0.239	-0.573	-0.286	-1.218	-1.64	-0.28	0.373	-0.508	-0.014	0.167	-0.057	0.302	0.18	-1.272	-2.286	-2.321	0.661	-0.771	0.18
GSM1672549	1.173	1.084	-1.067	0.918	0.582	1.94	0.082	0.235	0.003	-0.35	0.676	0.837	0.888	0.22	-0.905	1.774	1.489	0.011	-1.295	-1.29	0.831	1.731	0.729
GSM1672550	0.446	1.132	-1.419	-0.84	-0.287	-0.259	-1.319	0.334	-1.938	0.068	-0.448	-2.349	0.941	-1.431	0.658	0.987	-2.094	-2.104	-2.661	-2.061	0.762	0.03	0.372
GSM1672551	0.331	1.365	-1.728	0.715	1.247	2.383	2.465	0.379	1.029	-0.427	-0.719	-0.864	1.811	-0.968	-0.697	-0.797	-0.221	-2.338	-3.906	-1.058	1.402	-0.274	3.081
GSM1672554	1.625	0.882	-2.111	-0.322	0.838	1.608	0.442	-0.737	-0.034	0.124	-1.082	3.542	-0.105	1.184	1.581	1.138	-1.102	-3.292	-3.311	1.688	0.492	0.39	0.662
GSM1672555	1.299	0.413	-0.347	0.607	-0.512	-0.85	-0.5	-0.516	-1.465	-0.082	-0.047	1.019	-0.998	0.759	-1.251	0.223	-1.281	-2.049	-3.031	-0.539	-0.12	2.089	0.195
GSM1672558	0.802	0.24	-0.221	2.103	1.785	-0.268	-0.204	0.172	-1.535	-1.308	0.25	-1.051	0.689	-0.102	-0.432	-1.468	-0.55	0.648	-1.394	-2.611	0.711	0.211	-1.694
GSM1672566	-0.029	-0.47	0.156	1.164	-1.301	0.225	-0.061	0.418	-1.406	0.977	0.827	-0.379	-0.208	-1.395	-0.275	0.189	1.014	-2.42	-2.779	-1.803	1.429	0.706	1.436
GSM1672569	0.549	0.479	-2.044	1.333	1.011	-0.159	-0.391	0.627	-1.058	0.262	-1.064	1.857	-0.684	0.292	0.592	-0.514	0.616	-2.29	-2.812	-2.436	0.403	0.392	0.235
GSM1672573	0.631	-0.813	-0.959	0.453	0.654	-0.65	-1.066	-0.47	-1.563	-0.728	-0.13	0.447	-0.574	-0.064	-0.697	-0.117	1.115	-1.981	-1.081	-1.378	-0.41	0.039	0.863
GSM1672577	0.746	-0.428	-1.998	-0.763	-0.862	0.656	0.1	-0.447	-1.137	-0.228	0.614	0.211	-1.409	-0.101	-1.468	1.128	-1.522	-0.963	-2.346	-1.172	0.257	-2.203	1.952
GSM1672578	1.212	2.184	-0.162	1.044	0.224	0.554	1.685	-1.052	-1.12	-0.848	-1.143	0.224	1.131	0.12	-0.269	-0.891	-0.17	-1.865	-2.614	-2.176	1.787	1.87	2.057
GSM1672580	0.341	0.122	1.296	1.404	0.84	-0.278	-1.325	0.95	-1.358	0.062	0.339	0.121	-0.747	0.201	-1.127	1.326	1.283	-2.032	-2.289	-0.447	1.171	0.826	2.318
GSM1672581	0.371	-0.155	-0.135	-0.252	-0.661	1.471	-0.264	-0.808	-0.16	-1.059	-0.139	-1.271	0.12	-1.039	-0.89	0.949	0.751	-2.466	-2.582	-2.804	0.208	1.7	-1.807
GSM1672582	-0.338	0.077	0.131	-0.029	1.346	-1.037	0.253	-0.164	-1.238	0.11	1.092	-0.694	-1.234	0.197	-0.187	1.385	-1.247	0.332	-1.003	-1.461	0.934	-0.124	1.948
GSM1672583	0.098	0.234	-0.732	-0.075	0.268	0.364	0.715	-0.198	-1.824	-0.928	-0.181	-1.31	-1.37	-1.355	-0.124	-0.574	-0.208	0.494	-0.373	-2.151	0.132	-0.936	0.072
GSM1672584	-0.393	-2.199	-1.435	-0.645	0.809	-1.336	-0.685	-0.182	-1.61	-1.499	-0.154	-0.564	0.006	-0.2	0.965	-1.142	-0.141	-2.974	-2.796	-2.022	-0.602	-0.54	1.939
GSM1672585	0.131	0.379	-1.05	-0.007	-0.767	-0.468	0.971	0.05	-1.696	0.819	1.11	-0.169	1.008	-0.131	-0.454	-1.451	-1.383	-3.149	-2.496	-1.26	-1.451	1.935	0.111
GSM1672589	0.002	0.083	-0.227	0.806	0.003	-1.044	0.671	0.59	-0.454	-0.583	-0.487	0.1	0.997	-0.734	1.422	1.328	-0.782	-1.518	-0.987	-1.472	-0.719	0.676	-1.641
GSM1672590	0.309	-0.085	-0.835	0.899	0.242	1.861	0.463	0.571	0.053	-0.342	-0.084	0.688	0.48	1.364	1.43	1.907	0.945	-2.147	-1.425	-1.843	0.561	-1.217	0.347
GSM1672591	0.737	2.753	2.235	1.375	-0.265	1.104	0.699	0.147	-0.723	0.267	-0.301	-1.183	0.043	-1.091	0.855	1.597	-0.315	-1.84	-2.071	-2.291	1.311	1.303	-0.067
GSM1672599	0.621	-0.417	-1.456	1.704	0.845	1.452	0.04	0.907	-0.019	-0.611	-0.297	0.243	0.198	0.352	0.133	1.399	-0.972	-0.701	-1.736	-1.107	0.36	0.167	1.067
GSM1672602	0.187	0.618	-0.46	0.396	0.098	-1.022	1.356	-0.939	-0.546	-0.777	-0.681	0.978	-1.293	-0.338	-0.585	1.025	-0.506	-1.859	-2.673	-2.406	-0.597	0.884	0.073
GSM1672607	0.382	-0.532	-1.549	1.91	-0.211	2.206	2.49	1.36	-0.082	0.743	-0.508	-0.479	1.904	-0.455	-0.849	-0.564	-0.019	-2.706	-2.768	-2.631	0.888	-0.546	2.114
GSM1672608	0.332	-0.783	-1.951	-1.014	-0.737	-0.57	-1.29	-0.088	-1.546	-0.485	0.555	2.636	-0.898	-1.195	-0.918	0.154	-1.368	-1.352	-2.391	0.102	-0.856	-2.247	1.133
GSM1672610	0.487	-0.729	-1.275	-1.473	0.167	-1.272	-1.157	0.188	-1.315	-0.97	-1.226	-0.469	0.706	-0.625	-0.859	-0.158	-0.695	-0.262	-1.807	-2.449	-0.77	-0.642	0.569
GSM1672611	0.768	0.863	-1.483	0.28	-0.396	0.191	-0.283	-1.089	-1.558	-0.419	-0.779	0.751	-0.349	-0.78	-0.436	1.175	-0.911	-1.214	-2.255	-1.393	-0.159	0.815	2.605
GSM1672614	0.832	-0.869	-1.31	-0.828	1.403	-0.955	0.245	-0.395	-1.696	-1.627	0.115	1.052	0.686	-0.796	-0.828	0.789	-0.858	-2.798	-2.311	-1.981	0.101	-0.047	0.844
GSM1672620	0.57	-1.038	-1.635	0.259	-0.179	0.517	-0.213	1.02	-0.475	0.124	1.031	2.055	-0.095	-1.502	-1.198	1.002	-0.853	-2.673	-3.102	-0.035	1.149	0.31	-1.386
GSM1672621	1.274	0.007	-0.777	-1.101	0.545	0.065	-0.935	0.953	-0.063	-1.465	-1.115	1.878	-1.31	0.723	-0.45	1.647	-0.427	-1.335	-2.057	0.285	0.841	-0.172	-0.188
GSM1672623	0.609	-0.442	-1.929	1.133	0.228	-1.22	-0.339	-0.155	0.965	-1.422	-1.475	-0.202	-1.273	-0.814	-1.016	-0.538	0.317	-1.282	-2.594	-2.197	0.062	-0.613	0.485
GSM1672625	0.943	2.147	-2.107	0.946	0.212	2.391	1.649	1.23	0.095	-0.325	0.212	1.626	1.635	0.802	-0.319	1.772	-0.414	0.532	-0.816	-2.211	0.802	0.654	1.267
GSM1672627	0.336	0.345	-1.34	-1.733	0.128	0.439	-1.471	-0.488	-0.013	-0.008	0.303	3.215	-2.009	-1.436	-0.885	0.509	-1.126	-2.667	-3.214	1.348	-0.591	-0.025	0.61
GSM1672630	1.347	-0.061	-0.743	1.202	0.421	1.877	1.361	-0.792	-1.166	-0.803	-0.472	0.712	1.444	0.292	-0.983	1.414	-0.432	-2.029	-2.408	-1.853	-0.115	1.29	0.161
GSM1672632	0.455	-0.7	-1.271	0.105	0.047	-0.31	-0.366	-0.477	-0.412	-0.094	-0.561	2.41	-1.282	-1.464	-0.503	0.305	-0.748	-0.215	-1.925	-1.718	-0.819	-0.823	-1.833
GSM1672633	1.406	1.02	-1.729	-1.126	0.373	0.569	0.698	0.065	-1.29	-0.916	0.88	1.83	-0.084	-0.469	-0.882	0.581	-0.928	-2.592	-2.889	-2.181	0.589	0.196	-1.635
GSM1672634	0.898	-1.192	-1.641	-1.321	-1.583	-1.525	-0.682	0.618	-1.97	0.037	1.213	-0.174	-0.577	-0.793	-1.158	-0.136	0.31	-2.317	-2.92	-2.522	-0.787	1.842	1.108
GSM1672635	0.793	-0.133	-2.042	0.249	1.446	0.511	0.406	-0.347	-0.415	-1.582	-0.975	-0.025	-0.307	-1.076	-0.464	0.963	-1.089	-0.67	-1.824	-0.568	-0.331	0.514	0.326
GSM1672638	0.475	0.017	-1.253	0.56	-0.605	-0.313	0.228	-0.128	-1.611	-1.075	-1.015	0.682	0.153	0.108	-1.13	-0.511	-1.177	-2.76	-2.51	-2.543	0.517	0.042	-0.283
GSM1672642	0.34	-0.971	-1.356	-1.343	0.092	-0.749	1.383	0.07	1.196	-1.183	1.004	-0.518	-0.628	-1.106	-1.17	-0.302	0.171	-1.185	-2.664	-1.953	0.536	0.44	0.78
GSM1672644	0.512	0.045	-1.755	-0.251	0.953	-0.161	0.841	0.29	-1.105	-0.529	-0.464	0.513	0.494	-1.81	-1.288	-1.206	-0.466	-2.411	-3.322	-2.089	0.813	0.035	2.06
GSM1672646	0.982	-0.702	-0.408	1.209	-0.134	-0.091	0.826	-0.492	-1.51	-1.044	0.978	1.591	0.243	-0.715	-1.086	-0.651	-0.32	-3.378	-3.063	-1.624	0.741	2.356	1.552
GSM1672647	0.826	2.091	0.41	1.753	1.877	1.781	0.864	0.996	-0.876	-0.356	0.774	-0.324	1.27	-0.883	-1.243	0.984	-0.556	-1.135	-1.808	-1.902	1.684	-0.748	-2.244
GSM1672648	0.665	0.984	-2.427	-1.012	0.428	-0.113	-1.094	-0.016	-0.048	-0.565	-0.105	2.046	-1.325	-0.829	-1.036	0.375	-0.836	-2.632	-3.714	-0.301	-0.543	2.867	-0.309
GSM1672649	0.416	0.456	-0.656	-1.101	1.192	1.206	0.124	0.549	-0.197	-1.886	-1.259	-0.642	-0.764	-1.181	-0.93	0.361	-0.443	-2.31	-3.033	-2.613	0.51	2.708	0.079
GSM1672652	0.5	-0.798	-1.225	0.139	-1.068	-1.156	1.281	-0.418	0.873	-0.78	0.716	-0.201	-1.065	-0.904	-0.706	-0.522	0.062	-1.413	-2.441	-2.167	0.693	0.166	0.729
GSM1672657	0.273	-0.808	-1.351	0.638	-1.306	-0.111	0.574	1.169	-0.14	0.981	-0.812	0.087	-0.967	-1.565	-1.184	0.34	-1.11	-2.012	-2.624	-2.328	-1.162	-0.073	-0.704
GSM1672658	0.702	0.867	-1.518	0.275	0.878	-1.098	0.599	1.109	1.142	-1.128	1	1.021	-0.999	-1.407	-1.16	-0.236	-0.685	0.445	-0.715	-2.256	0.068	0.598	1.214
GSM1672659	1.31	2.38	-2.823	1.156	-0.093	2.241	1.494	-0.63	-0.063	-1.047	1.148	3.123	0.732	-0.523	-0.51	1.792	-0.25	-3.088	-3.012	-0.374	1.339	2.48	-0.076
GSM1672660	1.303	-0.175	-2.368	0.097	-0.786	-0.817	0.325	0.008	-1.916	-2.321	-1.304	0.144	-0.469	0.058	0.95	-1.379	-0.149	-2.11	-2.212	-1.685	-0.477	-0.28	0.234
GSM1672663	0.699	-0.416	-0.423	0.713	0.856	0.068	-0.013	-0.015	0.442	-0.027	0.139	-1.04	0.295	-1.284	-1.305	-0.33	-0.125	-2.514	-2.618	-2.734	-0.687	1.757	0.748
GSM1672665	0.797	1.909	-1.288	1.253	1.197	1.352	0.724	-1.056	-1.469	-0.317	-1.073	-0.6	1.096	-0.413	-0.369	0.391	-0.808	-1.253	-2.356	0.152	2.696	0.141	0.281
GSM1672666	0.565	0.389	-0.282	-1.136	-0.694	0.329	0.999	0.699	-0.043	0.375	-0.919	2.454	-0.644	-0.291	-1.368	1.47	-1.479	-0.433	-1.852	0.606	-1.189	0.078	-1.33
GSM1672667	0.709	-0.177	-0.84	-0.047	0.585	1.054	0.423	-0.008	-0.797	0.776	0.723	2.605	0.801	-1.696	-1.446	0.658	1.096	-1.485	-1.637	1.095	-1.039	-0.124	0.604
GSM1672668	0.229	-0.245	-1.037	-1.795	0.839	0.355	0.247	-0.347	-0.647	-1.023	-1.397	-1.128	0.224	-1.116	-0.756	-1.334	-1.522	-1.651	-3.041	-1.895	0.978	0.709	0.499
GSM1672669	1.302	2.334	-0.146	1.922	1.237	3.4	2.239	0.046	0.107	-0.954	-0.41	-0.233	2.016	0.151	-0.081	1.879	-0.127	-1.659	-2.365	0.955	0.862	0.639	1.954
GSM1672671	0.726	0.618	-2.053	0.969	-0.254	1.239	1.047	-0.003	-1.134	-0.561	-0.005	0.881	0.545	-0.17	-0.127	1.239	-0.179	-2.515	-3.469	0.791	1.76	0.101	0.027
GSM1672672	0.302	-0.479	-1.284	-0.261	-0.428	-1.022	0.001	-0.575	1.043	0.031	-1.021	-0.208	-1.352	-0.649	-1.02	-0.739	-1.298	-1.297	-2.68	-2.453	-0.501	0.523	0.547
GSM1672675	0.451	-0.3	-0.361	-1.026	-0.339	0.728	-0.227	-0.639	-0.297	-0.641	-0.85	0.243	-0.67	-0.981	-0.636	0.239	1.023	-1.718	-2.6	-2.036	-1.241	0.243	1.34
GSM1672676	0.538	-0.527	-1.343	0.979	-0.506	-1.39	1.335	0.816	-1.116	-2.037	-1.515	-0.425	0.475	-1.584	-0.781	0.608	-0.304	-2.165	-3.241	-1.834	-1	-0.292	1.563
GSM1672678	0.762	0.171	-2.428	0.728	-0.154	2.755	1.904	0.766	-0.005	-0.944	0.447	1.57	1.852	-0.602	-0.037	0.936	-0.203	-1.88	-2.729	-1.243	0.702	0.674	0.331
GSM1672679	0.517	-1.195	-1.099	-1.286	1.748	-1.417	0.768	0.129	0.688	0.729	0.983	1.373	1.342	-1.639	-0.729	-0.49	-0.834	-2.696	-2.664	-1.443	-1.335	0.509	-2.017
GSM1672680	0.485	0.12	-1.769	-0.157	0.358	1.099	-0.858	0.383	0.096	0.27	-0.669	0.444	0.012	-1.765	-0.973	0.713	-1.095	0.216	-0.521	-1.857	-0.221	2.531	0.85
GSM1672682	0.753	0.118	-1.617	0.868	-0.604	1.743	1.189	-0.876	-0.193	0.433	0.866	3.698	0.775	-0.147	-1.138	1.292	-0.114	-2.232	-2.922	-0.308	0.063	0.694	2.334
GSM1672683	0.825	-0.881	-1.335	-0.627	-0.786	-0.544	-0.312	0.543	-0.174	-0.306	-0.55	1.242	-1.036	-0.402	-0.77	0.408	0.126	-2.032	-2.343	-0.198	0.122	-1.308	0.519
GSM1672684	0.727	0.556	-1.019	0.22	-0.33	0.967	0.021	1.043	0.239	-1.426	-0.157	2.565	-0.081	-0.18	-1.244	1.485	-0.074	-1.482	-2.343	-0.839	0.246	-1.473	0.643
GSM1672685	0.615	0.45	-1.026	1.217	-1.353	-0.675	-0.958	0.412	1.019	0.977	-0.813	0.17	-0.984	-0.668	-1.334	1.38	0.591	-2.525	-3.227	-2.429	-2.18	3.146	1.181
GSM1672688	0.429	-0.071	-1.04	0.599	0.597	0.898	-0.568	0.373	-2.181	0.664	0.211	-3.486	-1.039	-0.87	-0.184	0.875	0.516	-3.068	-3.427	-1.837	-0.391	1.087	2.498
GSM1672689	0.906	1.213	-1.622	0.699	-0.532	-0.051	0.81	-0.766	-0.047	0.222	-0.311	1.028	0.07	0.296	-0.013	0.011	-0.484	-2.503	-2.805	-0.748	0.996	2.802	2.404
GSM1672692	1.007	1.178	-0.349	0.848	0.088	1.501	0.412	-0.536	0.134	-0.115	0.563	1.798	0.778	0.033	-0.486	1.293	-1.188	-0.016	-1.268	-0.465	0.028	0.834	0.81
GSM1672693	0.941	0.776	-1.869	-0.635	1.122	2.152	1.434	0.311	-0.294	-0.273	-0.7	-0.262	0.774	-1.23	-1.123	2.197	-0.384	-2.701	-3.424	-2.53	1.516	0.235	2.787
GSM1672694	0.78	2.946	2.063	1.345	0.485	2.058	1.967	-0.467	0.997	0.034	0.41	0.664	1.377	-0.235	-0.804	1.419	-0.541	-3.183	-3.712	-1.367	1.241	0.062	0.789
GSM1672696	0.469	-0.204	-0.688	-1.429	0.41	-1.426	-0.415	0.653	0.021	-0.111	-0.064	0.823	-0.626	0.149	-1.21	1.329	-1.783	-1.27	-2.232	-0.048	1.456	0.174	-0.289
GSM1672697	1.192	1.263	-0.906	1.002	0.793	-0.337	-0.118	1.321	0.892	1.069	0.879	-1.175	-0.539	0.104	-0.837	0.482	-0.718	-3.192	-3.391	-2.37	0.157	-0.568	0.333
GSM1672698	0.675	0.203	-0.367	2.695	2.037	2.358	1.024	1.335	0.033	-1.219	0.744	-0.418	1.469	-0.05	-0.173	1.996	-0.406	-1.188	0.137	-1.056	1.041	0.199	-2.344
GSM1672699	1.165	2.82	-2.384	1.776	0.521	3.308	2.058	0.322	0.409	-0.059	0.763	1.926	1.945	0.461	-1.006	2.221	-0.197	1.33	-0.204	0.351	1.366	-0.739	1.934
GSM1672701	1.169	1.748	-0.575	1.409	1.402	1.932	1.744	-1.32	-0.836	0.349	1.446	-0.102	1.929	0.14	-0.358	-0.922	-0.412	-1.334	-1.772	-1.376	0.229	-0.174	3.237
GSM1672702	1.024	0.914	-1.364	1.73	0.959	1.777	0.724	0.061	-0.362	0.007	0.296	3.847	0.779	-0.156	-0.784	1.81	-0.526	-3.126	-2.876	-0.83	0.484	-1.483	-0.41
GSM1672706	0.373	0.016	-1.02	1.094	1.214	0.344	-0.821	-1.036	0.066	-0.092	0.438	1.608	-0.687	0.553	-0.885	0.648	-0.338	-1.256	-3.013	-1.405	-0.637	-0.639	0.61
GSM1672707	0.205	-0.122	-1.545	0.032	-1.481	-0.149	0.155	1.196	-1.476	-0.319	-1.209	1.856	-0.596	0.677	-0.889	0.148	-0.472	-1.245	-2.049	-1.432	1.25	-1.752	2.694
GSM1672708	-0.091	-0.031	-1.281	-0.12	0.793	0.419	-0.827	-1.098	-0.095	0.055	-0.569	1.474	-1.255	0.972	0.564	1.32	-0.256	-2.226	-2.863	-1.014	0.579	1.506	0.286
GSM1672709	1.083	1.724	-1.427	0.292	0.974	1.779	0.706	-0.302	0.073	-0.086	-0.102	0.586	0.269	1.143	-0.858	2.102	-0.8	-3.04	-3.235	-1.436	1.264	1.52	0.697
GSM1672713	0.198	-0.551	-1.804	0.336	-0.043	1.349	0.528	0.755	0.122	-0.42	-0.443	0.961	0.37	-0.986	-0.96	0.783	-1.011	-2.413	-3.058	-1.328	0.808	-0.281	2.333
GSM1672714	0.64	2.098	-2.185	1.001	1.193	2.061	0.136	0.349	0.077	0.192	1.014	3.141	0.926	-0.512	-0.742	1.611	0.728	-2.504	-2.019	0.144	0.729	-2.823	-1.084
GSM1672715	0.726	-0.057	-0.681	0.813	0.056	1.452	0.71	-0.53	0.178	0.331	0.314	-0.103	0.093	-0.562	-1.05	1.707	-1.157	-1.896	-2.467	-2.228	1.035	0.516	1.514
GSM1672716	0.501	0.377	-0.688	-0.952	0.307	-1.136	-0.493	-0.234	1.597	-0.029	0.855	0.253	0.638	-0.545	-0.542	0.302	-0.644	-0.353	-2.08	-1.227	0.84	0.123	-0.077
GSM1672717	1.597	0.337	-0.627	0.343	-0.392	1.295	1.51	0.93	-1.115	-1.191	1.209	-0.017	0.686	1.121	-0.932	0.793	-0.755	-1.127	-2.55	-1.289	1.067	1.271	-0.141
GSM1672718	0.435	-0.395	-0.807	-0.601	-0.633	-1.013	-0.811	1.162	0.486	-1.137	-1.119	0.559	-0.74	0.167	-1.493	-0.736	0.64	-1.531	-3.093	-1.753	1.111	0.369	0.373
GSM1672719	1.276	-0.323	-1.085	0.614	0.553	0.688	-0.26	-1.206	-0.969	-0.555	0.251	0.983	0.004	0.019	-0.281	0.549	-1.278	-1.532	-2.744	-1.669	1.008	2.507	-1.274
GSM1672720	1.106	-1.062	-1.628	1.204	0.215	0.503	0.446	-0.745	0.839	-1.134	-1.112	-1.274	0.068	0.368	-1.323	-0.398	-0.612	-2.425	-3.443	-2.481	0.833	2.337	-0.125
GSM1672721	0.349	0.443	-1.181	-0.287	-1.323	-0.414	-0.134	-1.153	0.129	0.039	-0.754	2.037	-0.568	1.112	-0.804	-0.209	-1.377	-2.094	-3.27	-1.841	0.47	-0.073	2.308
GSM1672722	0.034	-0.997	-1.279	-0.743	0.698	0.717	-0.743	1.137	-0.442	-0.132	-0.553	1.408	-0.836	0.791	-0.487	1.226	-1.665	-3.302	-3.21	-0.746	-0.205	0.384	-0.041
GSM1672723	0.306	0.035	-2.13	0.911	-0.45	0.122	-0.873	0.676	-0.816	1.102	0.93	0.125	-1.112	-0.88	-0.782	0.426	-0.917	-0.808	-1.358	-0.776	1.874	1.493	-0.067
GSM1854799	2.117	1.614	0.388	3.049	2.424	1.927	1.127	1.208	0.34	0.061	1.606	0.933	1.752	0.487	-0.899	2.118	0.032	-0.963	0.671	-1.355	0.437	1.381	0.699
GSM1854802	2.001	1.576	-0.158	1.993	1.53	1.3	1.432	0.217	0.212	0.15	1.366	0.41	1.674	1.387	-0.033	0.41	-0.285	-1.151	-2.013	-1.4	-0.441	0.636	1.732
GSM1854805	1.811	2.502	-1.68	0.455	-0.168	-0.689	-0.931	0.643	0.953	-0.076	0.099	0.585	-0.938	-1.017	0.207	0.993	-0.941	-0.286	-1.835	0.151	-0.143	0.174	0.841
GSM1854810	2.05	2.474	-0.198	2.637	1.664	2.327	2.291	1.172	-0.773	0.63	0.101	-0.257	2.211	0.562	-0.173	1.823	0.973	-0.944	-2.227	-0.383	0.357	0.123	1.039
GSM1854815	1.711	0.92	0.209	2.578	1.46	1.978	1.667	1.047	0.51	-0.635	-0.409	-0.082	1.778	0.919	0.069	2.09	0.653	-0.652	-1.61	-1.001	0.048	-1.613	2.362
GSM1854817	0.591	0.263	-1.068	0.944	0.037	-1.262	-0.653	0.727	-0.831	-0.445	-0.643	-0.195	-0.1	-1.052	-0.266	0.302	0.631	-1.305	-2.846	-0.765	-0.887	0.53	1.055
GSM1854818	2.197	1.857	-0.156	3.15	2.198	2.201	2.16	1.254	-1.055	0.295	0.938	0.117	2.511	-1.115	0.157	1.303	0.523	0.655	-1.251	-1.39	0.032	0.651	2.371
GSM1854820	2.359	1.662	0.486	3.353	2.202	2.496	2.032	2.128	0.39	0.061	0.503	0.932	2.292	-0.799	0.046	2.194	0.788	0.849	-0.813	-1.002	1.479	1.403	1.6
GSM1854822	1.807	0.176	-1.498	-0.156	1.267	0.114	-0.959	0.16	0.739	0.048	0.595	0.569	-0.1	-0.495	-0.324	-0.521	-0.026	-1.075	-2.625	0.774	-0.036	1.922	2.616
GSM1854823	1.556	0.216	-1.243	-0.792	0.173	-0.375	-0.822	0.186	-1.15	0.327	0.99	2.49	-1.12	1.01	-0.747	0.316	0.488	-1.381	-2.563	-1.055	-0.711	-0.394	0.727
GSM1854825	1.751	1.768	-1.921	2.272	2.602	1.399	0.815	0.999	1.17	0.108	1.387	-0.45	1.627	-0.409	-0.755	0.694	0.965	0.957	-1.126	-0.374	0.278	-0.643	0.336
GSM1854827	1.688	1.074	-0.555	1.839	1.3	2.702	1.84	0.18	0.333	0.178	1.608	0.131	2.463	1.018	0.162	1.471	-0.008	-0.515	0.544	-0.65	0.512	-2.39	2.148
GSM1854829	1.645	0.898	-0.398	0.944	1.765	1.377	0.142	-0.1	-0.365	0.036	1.673	0.324	1.082	0.942	0.991	1.072	0.793	-1.022	-1.259	0.7	-0.092	-2.182	0.883
GSM1854830	1.687	0.433	-1.73	-0.207	0.257	0.801	-0.233	-0.218	-0.278	-0.256	0.579	-1.271	0.804	-0.234	-0.106	0.159	-0.871	-1.1	-1.757	-0.66	-1.373	0.963	1.361
GSM1854831	1.489	0.511	-1.321	1.202	0.323	0.334	-0.855	0.484	-0.045	0.066	-0.189	0.441	-0.881	-0.696	0.565	-0.353	-1.242	1.051	-1.506	0.493	0.277	0.215	2.068
GSM1854838	1.861	1.739	-0.348	-0.424	1.811	0.661	-1.216	-1.559	-0.106	0.519	1.098	1.221	-0.212	-1.197	0.002	1.933	0.785	-1.37	-1.1	1.278	0.487	-1.053	-0.613
GSM1854841	1.12	0.512	0.225	0.989	0.319	0.058	-1.219	0.494	0.162	1.388	1.061	-1.305	-0.966	-0.508	-0.181	1.826	-0.276	-0.084	-1.834	0.408	0.46	1.879	-0.701
GSM1854846	1.596	1.167	-2.544	-0.87	0.784	-0.862	0.64	-0.071	0.969	-0.943	-0.457	0.973	1.178	-1.226	-0.737	-0.04	-0.574	-0.419	-2.203	-0.525	-0.484	-0.022	-0.809
GSM1854849	1.632	0.956	-0.538	1.219	1.821	1.859	0.694	0.418	0.539	-1.036	0.393	1.141	1.472	-1.233	-0.957	1.63	-0.528	0.294	-1.203	0.54	0.316	1.824	2.759
GSM1854853	2.246	1.448	0.191	2.115	1.184	1.953	1.626	0.804	0.516	0.186	0.008	2.756	1.403	0.873	-0.64	2.625	0.128	-0.912	-2.124	0.844	0.747	-1.731	2.082
GSM1854855	2.088	2.766	1.514	2.262	1.845	0.11	0.148	0.992	0.037	0.218	0.424	-0.232	0.253	1.146	-0.167	0.466	0.257	0.418	-0.748	1.385	0.898	-1.818	0.356
GSM1854856	2.222	1.762	-0.458	1.917	1.32	1.895	1.89	0.517	0.301	0.613	1.166	0.922	2.281	-0.682	0.267	0.61	-0.388	-1.051	-2.579	-1.394	0.003	-1.686	1.93
GSM1854859	2.36	1.349	0.39	3.07	1.906	0.5	0.131	1.908	-0.924	0.172	0.687	-0.081	0.605	1.338	-0.627	1.528	1.067	-1.247	-0.519	0.324	1.219	-1.259	1.611
GSM1854861	2.242	4.256	-0.125	1.585	0.405	0.913	0.92	0.666	-1.265	0.096	1.22	2.325	0.948	-0.933	0.42	1.4	-0.175	-0.61	-2.097	-0.457	-0.492	-1.693	1.873
GSM1854865	1.728	3.487	-2.371	1.378	1.661	1.308	0.038	0.965	0.1	0.33	0.947	0.966	0.755	-1.252	0.499	2.13	0.861	-1.67	-2.263	0.41	1.465	2.015	1.163
GSM1854866	1.358	0.791	-0.429	0.479	0.033	1.334	1.017	-0.686	-0.229	0.372	-0.052	0.438	0.723	0.693	-0.551	1.127	-0.182	-1.394	-2.809	0.931	0.301	0.805	0.804
GSM1854868	2.21	1.087	0.719	1.377	1.272	2.425	2.059	-1.183	-0.605	-0.397	0.454	-0.373	2.29	1.439	0.312	0.575	0.06	0.15	-1.428	0.255	0.075	-0.109	1.713
GSM1854869	1.195	1.013	-1.473	0.937	1.62	-0.904	0.649	0.243	0.757	-1.384	-1.108	-1.385	-1.336	-1.59	-0.901	0.248	-0.983	0.854	-1.539	-0.678	-0.16	0.753	-1.223
GSM1854873	2.76	1.149	-0.798	-0.357	0.408	-0.132	-0.395	0.187	0.004	-0.289	0.34	-0.702	-0.112	0.408	-1.328	0.32	0.24	-1.398	-1.984	-0.908	0.489	2.818	0.461
GSM1854876	1.882	0.38	-2.38	1.001	1.43	0.34	-0.325	0.724	-1.531	0.219	0.541	0.526	0.15	1.233	1.174	0.212	0.706	0.715	-1.118	0.267	0.745	1.125	1.578
GSM1854877	1.803	1.082	0.477	3.224	2.378	2.274	1.546	1.686	0.638	0.396	0.789	0.768	1.821	0.493	0.23	2.337	0.522	1.198	-0.296	0.337	0.792	-1.187	2.249
GSM1854880	1.849	1.592	-0.212	2.852	1.426	1.699	1.802	1.252	-0.438	0.258	0.012	0.695	1.7	0.125	-0.457	1.493	0.492	-0.579	-2.017	-0.538	0.793	-1.453	2.158
GSM1854881	1.901	2.505	-1.706	2.061	1.287	0.759	0.45	1.07	-0.805	-0.062	-0.443	0.809	0.443	0.141	-0.211	1.447	0.169	-0.792	-1.868	-0.082	1.153	2.103	2.018
GSM1854882	1.756	2.889	0.497	2.547	1.493	1.788	0.67	0.756	0.718	-1.044	-0.268	-0.923	1.394	-0.541	-0.985	2.029	-0.04	-0.905	0.006	-0.108	0.377	1.052	2.127
GSM1854883	1.895	0.185	-0.019	0.427	0.799	-0.098	-0.627	1.035	0.188	-0.731	0.899	0.709	-1.029	0.109	-0.61	1.463	-0.111	-1.439	-2.505	-0.143	-0.037	0.549	0.809
GSM1854885	1.931	1.559	0.021	1.471	1.377	-0.019	-1.495	1.01	-0.316	-0.109	-0.174	-0.273	-1.085	1.062	-0.444	1.611	-0.452	0.149	-1.693	0.802	0.535	2.005	0.922
GSM1854886	1.865	1.212	-0.816	-0.475	0.048	-0.541	-0.581	-0.161	0.933	0.043	0.106	-0.324	-0.73	0.427	0.828	0.322	0.631	-1.336	-2.902	-1.151	1.431	-0.93	1.414
GSM1854887	2.003	1.795	-2.013	0.678	1.357	-0.18	-1.048	0.156	1.208	-0.783	-0.446	-0.098	-0.542	-0.577	-0.284	0.501	1.007	-1.159	-0.832	-0.755	-0.728	1.903	0.82
GSM1854889	1.73	1.19	-0.574	1.269	1.053	0.976	-0.231	0.646	-0.351	0.153	0.629	1.777	0.393	-1.506	-1.093	0.826	-1.108	-1.343	-2.473	0.448	-0.126	2.609	1.398
GSM1854890	1.749	1.397	0.38	2.791	2.565	0.81	-1.191	1.714	0.554	-0.291	0.56	1.939	-0.127	0.852	0.28	2.071	-0.155	0.098	-1.469	-0.52	0.354	0.906	1.447
GSM1854891	2.283	2.65	-1.571	0.289	0.856	-0.208	-0.96	0.42	0.662	0.197	1.994	1.54	-0.726	-0.101	-1.166	0.455	-1.162	-1.2	-1.393	-0.785	-0.698	0.833	0.99
GSM1854892	2.037	2.157	-2.074	0.397	1.435	1.441	-0.498	-0.003	0.38	-0.108	0.984	1.808	0.624	-0.857	-0.421	1.259	-0.281	0.739	-0.837	0.485	-0.684	0.309	0.303
GSM1854893	2.082	3.628	-0.912	1.001	0.185	1.502	0.829	0.473	1.166	-0.149	0.113	-0.248	0.842	-0.164	1.065	2.5	-0.248	-0.772	-1.045	-1.293	-0.022	-1.993	0.713
GSM1854895	2.083	3.86	-1.494	2.811	1.092	0.277	-0.405	1.809	0.233	-0.524	-0.902	0.35	-0.489	1.139	0.561	2.005	1.202	0.772	-0.651	0.412	0.858	-0.303	1.147
GSM1854899	1.943	3.228	-0.09	2.209	2.177	1.404	0.303	1.127	-0.126	0.199	0.565	2.432	0.707	-0.063	-0.69	1.519	-0.412	-0.543	-1.848	0.515	0.773	1.951	1.101
GSM1854903	1.987	1.341	-0.414	2.356	2	1.731	1.748	0.299	-1.376	0.044	-0.036	1.071	1.799	-0.782	-0.112	1.365	0.151	-0.936	-2.699	-0.117	0.935	0.952	1.067
GSM1854904	1.883	1.023	1.036	3.101	2.124	1.784	1.071	1.403	0.642	0.036	0.323	0.627	1.346	-1.436	0.311	2.078	0.734	-0.448	-2.105	0.852	1.116	-0.615	2.423
GSM1854906	1.904	3.332	-1.865	-0.385	0.812	0.838	0.24	-1.258	1.157	0.002	1.002	-1.096	1.063	-0.534	-1.175	0.34	-0.445	-1.007	-1.847	-1.657	-0.501	2.311	2.671
GSM1854908	2.014	1.642	0.864	3.872	3.118	2.773	1.842	2.2	1.099	0.45	1.574	2.265	2.482	1.234	-0.031	2.67	0.962	-1.081	-0.233	-1.61	1.095	1.274	0.723
GSM1854909	1.853	1.009	-2.348	1.645	2.23	1.031	-0.908	0.303	-0.206	0.429	1.821	-0.797	0.299	-0.573	-0.947	0.866	0.308	-0.717	-0.773	0.351	-0.154	-0.766	1.934
GSM1854910	1.944	0.985	-0.052	3.54	2.707	1.907	1.523	2.033	-0.363	0.199	1.232	-0.147	2.119	0.702	-0.532	1.696	1.024	-0.118	-1.481	0.355	0.921	-1.809	1.537
GSM1854913	2.186	0.787	-0.023	2.715	1.812	1.504	1.082	1.696	-0.368	0.307	0.455	2.57	1.148	-1.254	0.198	1.947	0.717	-0.171	-1.375	0.522	0.5	-0.647	1.562
GSM1854915	2.373	1.999	-0.058	2.587	2.234	1.505	0.131	1.581	1.202	0.268	0.867	3.063	0.786	-0.851	0.461	2.519	-0.007	0.742	-0.283	1.192	0.4	0.603	1.125
GSM1854916	2.059	2.078	-0.22	0.898	1.248	-0.167	-0.749	0.845	-1.509	0.244	0.231	-0.774	-0.422	-0.03	-0.445	0.852	1.057	-0.089	-1.846	-0.452	0.783	2.905	1.159
GSM1854921	1.988	0.819	-0.283	2.28	2.226	1.501	0.785	0.503	1.317	0.186	1.884	-1.172	1.584	0.366	-0.423	0.241	-0.444	0.933	0.142	0.542	-0.168	0.124	0.693
GSM1854927	1.801	0.197	0.471	3.442	2.887	2.738	1.643	2.051	0.859	0.195	1.197	-0.089	2.332	0.113	-0.794	2.184	0.457	1.259	0.379	-1.338	0.848	0.632	0.839
GSM1854928	1.676	0.969	0.333	3.197	2.506	1.617	0.745	1.316	0.106	0.465	0.844	-1.393	1.187	0.743	0.137	1.76	1.426	-0.005	-1.521	0.745	0.728	-0.81	0.914
GSM1854932	2.313	1.163	0.13	1.07	0.997	1.583	1.321	0.31	-0.9	0.344	0.358	0.375	1.516	0.967	-0.028	1.693	-1.095	-0.885	-0.203	-1.053	0.229	-0.646	0.357
GSM1854933	1.594	0.391	-1.345	-1.108	-1.277	-0.885	-1.441	-0.465	-1.164	-0.053	-0.243	0.103	1.048	-1.187	-1.412	0.787	0.173	-1.189	-2.346	0.214	-0.708	0.396	0.618
GSM1854938	2.665	2.011	0.705	0.935	-0.506	0.976	0.679	0.39	0.214	0.04	-0.847	3.309	0.111	-0.654	1.078	1.645	-0.485	-1.058	-2.315	1.284	-0.548	0.493	1.752
GSM1854941	2.142	3.884	1.581	1.869	1.776	0.972	1.022	0.204	0.535	0.279	0.999	1.214	1.454	-1.497	-1.16	0.027	-0.4	-0.12	-1.431	-0.534	-0.64	1.208	0.568
GSM1854942	1.985	3.226	-1.095	1.397	1.111	1.027	1.202	0.133	0.355	0.466	0.843	-0.457	1.363	1.076	0.065	0.607	-0.808	-0.618	-1.866	-0.943	0.342	0.984	-0.322
GSM1854944	2.119	1.833	0.264	2.828	2.582	2.299	1.712	1.149	-0.148	0.311	1.476	0.868	2.276	1.069	-0.182	1.885	0.201	0.126	-1.029	0.147	1.11	-1.222	1.466
GSM1854945	1.991	4.12	0.153	2.822	2.129	1.689	1.276	1.408	-1.142	0.079	1.311	-0.213	1.94	-1.538	0.452	1.056	-0.346	0.996	-0.928	-0.452	0.573	-1.494	1.634
GSM1854947	1.946	2.696	0.953	0.021	0.103	1.225	0.965	-0.442	-1.103	0.435	1.074	1.399	0.746	0.81	-0.198	1.298	1.009	-0.592	-1.797	0.016	0.147	-2.173	0.785
GSM1854948	1.745	1.72	-1.761	0.068	1.134	-0.191	1.254	-0.72	-0.392	1.248	-1.46	0.284	-1.054	-1.149	-1.039	1.095	1.141	-0.286	-1.265	1.154	0.867	0.441	1.267
GSM1854953	2.201	1.331	-1.07	1.924	2.112	2.048	1.392	1.036	0.84	-0.068	0.701	-0.577	1.646	-0.554	-0.84	2.407	-0.698	-0.289	-1.704	-0.619	0.062	-0.397	1.035
GSM1854954	1.762	1.777	-0.152	1.848	1.794	2.149	1.928	0.163	-0.357	0.355	1.194	1.437	1.974	-1.019	0.396	1.829	-0.637	-1.197	-2.557	1.201	1.029	-1.238	0.725
GSM1854955	1.558	0.956	-1.493	-0.235	0.597	-1.233	0.965	-0.642	0.67	-0.508	-1.002	-0.918	0.82	-1.042	-0.943	-0.426	-1.234	-0.38	-2.027	-0.554	0.081	1.005	-2.112
GSM1854956	1.476	0.898	-0.548	2.105	0.467	1.001	1.911	0.754	0.485	0.12	-0.533	0.238	1.382	0.447	-0.171	0.327	0.553	-0.961	-2.048	-1.54	-0.725	-1.728	2.39
GSM1854961	2.117	4.074	-0.243	-0.017	-0.565	0.406	1.032	0.083	-0.229	0.312	0.461	0.709	0.525	0.099	0.579	0.481	0.935	-1.461	-2.02	0.997	-0.46	1.416	0.895
GSM1854963	2.887	2.014	-0.188	-0.119	-0.85	1.109	0.958	0.29	-0.037	0.254	-0.594	-1.127	0.669	0.943	0.608	1.154	0.106	-1.943	-2.442	-1.664	0.223	-1.271	0.921
GSM1854964	2.141	1.568	-1.201	0.825	-0.233	-0.888	1.183	-1.49	0.871	0.024	0.3	1.792	-0.961	-0.082	-0.285	0.407	-1.028	-1.791	-2.436	-0.548	1.079	0.621	-0.156
GSM1854965	2.013	2.139	-0.262	2.085	1.928	2.101	1.222	0.498	0.404	0.877	2.634	3.503	1.714	0.082	-1.523	2.063	-0.505	0.214	-1.095	-0.226	0.174	-1.867	0.577
GSM1854967	1.693	1.56	-1.449	0.425	1.482	0.166	-1.058	0.316	1.075	0.274	1.356	2.128	-0.027	-0.38	-0.607	0.825	0.839	-0.358	-1.8	-0.419	0.161	-0.09	0.303
GSM1854969	1.724	0.811	-1.192	0.777	0.953	0.628	0.059	-0.815	1	-0.726	0.31	-0.497	0.816	0.111	-0.558	-0.158	-0.757	-0.721	-2.424	0.636	-0.598	1.804	-1.546
GSM1854971	1.885	3.781	0.502	2.863	1.757	1.393	0.842	1.469	0.33	0.078	0.048	3.388	1.054	0.701	0.039	2.028	0.791	-0.414	-1.651	-0.13	0.501	-1.928	1.848
GSM1854975	1.992	0.325	-0.268	1.597	0.873	0.53	0.715	0.845	0.76	-0.294	-0.784	2.158	0.58	0.712	0.327	1.053	-0.552	-0.603	-1.981	1.743	-0.217	-1.584	1.723
GSM1854980	1.709	2.57	0.273	3.349	2.268	0.73	0.389	2.194	-1.181	0.02	0.841	-0.295	1.075	1.144	-0.385	1.834	0.18	1.025	-0.724	-0.028	1.108	0.661	1.457
GSM1854981	2.113	0.727	-1.214	0.156	0.894	1.321	1.081	-1.272	0.51	-0.444	0.672	0.535	1.816	-0.752	-0.968	-0.644	0.654	-1.317	-2.515	-0.702	-0.806	1.072	1.891
GSM1854983	1.414	-0.17	-0.283	-0.448	0.536	0.004	-1.421	-0.104	-0.298	-0.457	0.034	2.093	-1.266	-0.611	-0.459	1.032	0.594	-0.703	-2.212	-0.935	0.165	2.156	1.688
GSM1854984	1.923	0.856	0.078	2.221	1.846	0.318	-1.063	1.242	0.126	0.218	0.535	0.616	-0.512	0.35	-0.086	2.388	0.448	0.268	-1.373	0.617	0.878	1.905	2.054
GSM1854986	2.038	1.101	0.075	2.284	1.885	1.505	1.692	0.844	0.935	0.314	1.302	0.969	1.957	-1.143	-0.267	1.105	-0.185	-0.288	-1.785	0.272	0.063	-0.978	1.398
GSM1854992	2.076	1.933	0.245	0.464	1.689	0.943	-0.624	-0.114	0.412	0.329	1.675	3.311	0.347	-0.755	-0.234	2.101	-1.535	0.647	-0.597	0.33	0.392	-1.377	0.812
GSM1854995	2.14	1.88	0.658	1.48	0.437	0.875	0.615	0.631	-0.891	0.078	0.326	1.477	0.846	0.625	-0.015	0.87	-0.237	1.191	-0.851	0.268	0.624	-0.84	1.571
GSM1854997	1.8	2.014	-2.054	-0.658	0.858	-0.636	0.79	0.094	-1.062	-1.118	-0.804	-1.282	-1.319	-1.249	-0.963	0.784	-0.588	0.135	-1.863	0	-0.59	0.339	0.937
GSM1854998	1.927	1.867	-2.375	1.352	1.481	1.418	0.872	0.63	-0.823	0.309	0.897	0.044	1.164	1.329	-0.263	1.454	-1.61	-0.232	-1.187	0.659	0.771	-1.129	0.525
GSM1855000	1.774	2.847	-0.254	1.814	1.473	1.423	1.459	0.15	0.088	0.239	2.367	1.042	2.171	-0.308	0.429	-0.85	-0.544	0.857	0.258	0.607	-0.657	1.115	2.15
GSM1855001	1.935	2.078	-0.206	1.542	1.261	0.735	-0.351	0.612	-0.556	-0.06	0.312	3.045	-0.051	1.052	-0.129	1.676	-0.416	1.22	-0.775	0.71	-0.482	1.142	1.205
GSM1855006	1.813	3.567	-2.038	2.422	2.667	1.775	0.659	0.912	-0.205	-0.378	1.138	1.392	1.58	1.466	-0.166	1.873	-1.318	0.151	0.704	-0.868	0.553	-0.858	0.471
GSM1855009	1.874	1.714	-0.852	1.455	0.931	-0.198	-1.174	0.898	-1.218	-0.3	-0.153	2.082	-0.678	1.217	0.081	0.909	-0.513	0.074	-1.882	-1.267	-0.326	0.962	1.492
GSM1855012	2.066	3.382	-1.212	1.041	0.616	1.008	0.457	0.64	-1.199	-0.613	0.578	-0.925	1.224	0.767	0.2	1.002	0.985	0.465	0.567	0.587	0.534	-1.292	-0.117
GSM1855014	1.976	1.327	1.331	2.658	2.149	1.931	1.329	1.4	0.267	0.333	0.937	-0.427	1.55	0.608	-0.473	1.902	0.45	-0.167	-0.839	-0.428	0.865	-0.112	1.464
GSM1855016	2.054	2.597	0.235	2.411	1.738	1.231	0.991	0.946	-1.531	-0.165	0.447	1.216	1.208	-1.027	0.365	0.723	0.188	-0.794	-2.752	1.349	0.235	-1.989	2.257
GSM1855018	1.638	1.234	0.295	1.981	2.201	0.596	-0.316	1.15	-1.267	0.282	0.907	-0.251	0.561	0.613	-0.547	0.945	-1.128	0.964	-1.08	-0.672	0.04	-2.215	0.305
GSM1855019	2.186	3.401	-0.203	3.01	2.167	1.031	-0.127	1.522	0.339	-0.014	0.576	0.934	0.523	1.181	0.136	2.312	0.493	0.294	-1.396	0.036	0.118	0.762	0.841
GSM1855020	1.689	0.852	-1.038	0.106	1.201	0.126	-0.535	0.077	0.569	-0.31	1.246	0.627	0.223	-0.17	-0.728	0.086	0.353	-0.219	-1.511	-0.858	-0.93	1.433	-0.581
GSM1855021	1.954	0.7	0.933	3.452	2.365	2.339	1.552	1.89	0.836	0.22	0.822	-1.47	1.84	0.61	-0.845	1.983	1	0.815	-0.997	-0.519	0.206	-0.772	1.436
GSM1855022	2.023	1.756	-0.219	2.76	2.175	1.849	1.484	1.754	-0.165	-0.09	0.212	1.437	1.469	1.273	0.099	1.388	0.291	-0.471	-1.387	1.278	0.775	-1.282	1.625
GSM1855023	1.265	0.235	-2.095	0.995	-0.923	-0.152	-1.331	0.991	-0.232	0.271	0.158	0.997	-1.379	0.048	0.452	1.484	0.701	-1.462	-2.367	1.021	-0.198	-0.022	-0.53
GSM1855024	1.72	1.418	0.189	2.911	2.042	1.961	1.502	1.802	0.778	0.019	0.178	1.234	1.524	1.08	0.218	2.363	0.118	0.882	-1.062	-1.283	1.055	-0.521	1.703
GSM1855026	1.955	2.107	0.022	3.401	2.381	2.401	2.235	1.57	0.284	0.181	1.052	1.933	2.388	-1.197	0.619	2.286	1.164	0.433	-1.219	-1.332	0.608	-0.713	1.867
GSM1855027	1.796	3.268	-0.008	1.936	1.346	0.8	-0.308	1.335	0.319	0.135	0.314	2.856	-0.05	1.269	-0.118	1.813	-0.501	-0.195	-1.746	0.4	-0.301	-0.645	1.629
GSM1855028	1.136	0.957	-1.28	1.919	0.489	1.012	0.651	1.933	-1.263	-0.171	0.33	0.497	1.053	0.334	-0.326	1.175	-0.92	-0.646	-2.1	-0.058	0.162	1.781	1.832
GSM1855029	1.788	2.519	0.242	1.684	1.371	0.571	0.636	0.367	-0.23	-0.112	1.227	-0.156	1.09	-0.102	0.358	-0.724	-1.135	-0.107	-1.354	-1.173	-0.652	-0.649	1.792
GSM1855032	1.879	2.315	0.748	2.868	2.585	1.718	1.073	1.377	-0.75	-0.111	0.66	1.058	1.614	-0.193	-0.124	1.031	-0.474	0.628	-1.244	-0.666	0.022	0.303	1.274
GSM1855033	2.048	2.037	-1.802	1.59	0.964	0.864	0.821	-0.234	1.177	-0.413	0.907	-0.891	1.078	0.505	-0.031	0.904	-0.504	-1.132	-2.76	0.21	-0.023	-0.557	0.927
GSM1855037	1.722	0.38	-1.018	0.225	0.074	0.264	-0.731	0.163	-0.962	-0.578	0.144	0.619	-0.244	0.039	-0.084	0.698	0.986	-0.417	-1.969	0.238	-0.482	1.673	-0.901
GSM1855038	1.84	1.299	-0.178	-0.251	-0.033	-1.338	0.8	0.263	0.959	0.011	-0.118	0.609	0.582	1.219	1.433	0.758	1.18	-0.94	-2.13	-1.032	-0.442	1.715	1.797
GSM1855039	2.234	1.47	-0.405	1.456	0.648	1.729	1.819	0.526	0.403	0.522	1.893	1.952	2.064	-0.6	1.236	0.863	-0.445	0.71	-1.118	-0.875	0.541	0.16	1.946
GSM1855042	1.815	1.738	0.552	3.153	2.131	1.713	1.84	1.258	-1.181	0.315	0.83	0.101	2.243	1.004	-0.437	1.134	0.699	-0.002	-1.515	-1.241	0.065	-1.339	1.704
GSM1855043	1.471	0.356	-1.036	1.342	0.47	-0.362	-1.468	0.883	-0.69	-0.94	-0.924	1.591	-1.068	-0.549	-0.207	1.199	0.092	-0.55	-2.229	-1.044	-0.078	0.818	1.643
GSM1855045	1.812	1.655	-1.63	-1.139	1.551	-0.566	0.7	-1.157	0.117	-1.056	0.381	-0.91	-0.781	-1.611	-0.91	-0.406	-0.909	-1.267	0.069	0.543	-0.969	0.411	-0.933
GSM1855047	2.072	1.41	-0.241	1.477	0.885	1.882	1.324	0.527	0.328	0.319	0.077	0.535	1.094	-1.147	-0.848	2.368	-0.087	-1.306	-2.716	-0.538	-0.147	-2.079	1.018
GSM1855049	1.588	0.977	0.673	2.522	1.724	2.057	2.294	1.242	1.072	0.097	0.704	2.015	2.375	-1.355	-0.457	0.964	0.449	0.651	-1.066	0.035	0.311	0.391	0.762
GSM1855050	1.694	1.673	-0.148	3.129	2.762	1.133	0.104	1.535	-0.832	-0.025	1.123	0.199	1.06	0.283	0.55	0.974	0.381	-1.142	0.012	0.786	-0.151	-0.966	0.675
GSM1855051	1.685	0.828	-1.586	1.302	2.076	0.257	-1.069	0.224	1.002	-0.216	0.806	1.588	0.084	-1.063	-0.999	0.321	1.118	-0.481	-2.172	0.402	0.232	1.109	0.708
GSM1855060	1.858	0.929	-1.328	-1.162	0.091	0.792	0.048	-0.561	-1.336	0.475	1.897	2.515	0.338	-0.568	0.568	1.574	-0.646	-1.063	-2.589	-0.069	-0.086	0.387	0.754
GSM1855062	1.837	1.719	-0.286	2.565	2.374	2.314	1.38	0.683	0.861	0.302	1.554	2.181	2.047	-1.216	0.643	1.737	-0.516	-0.496	0.175	-1.378	-0.252	-1.109	1.715
GSM1855064	1.863	0.819	1.964	1.526	2.17	1.378	-0.041	0.862	-0.177	0.318	1.311	3.299	0.666	-1.522	0.303	1.981	-1.437	-0.137	-2.061	-0.428	0.444	-1.129	0.95
GSM1855065	1.81	1.012	-1.019	1.929	1.768	0.345	0.58	0.782	-0.352	0.157	0.179	-0.916	0.634	-1.332	0.225	0.247	-0.221	0.197	-1.344	-1.01	0.578	0.88	0.22
GSM1855066	1.471	0.588	-1.341	-0.564	0.75	-0.047	0.836	0.25	-0.817	-0.129	0.477	0.862	-1.028	-0.988	-0.631	1.106	-1.289	-0.79	-2.322	-1.471	0.172	0.253	-2.087
GSM1855068	2.337	1.954	1.746	1.217	1.454	1.228	0.899	0.288	1.318	0.629	1.669	2.639	0.969	1.098	1.748	1.395	0.749	-1.587	-2.321	-0.143	-0.084	-1.34	0.613
GSM1855073	1.363	0.712	-0.387	1.953	2.399	-0.269	0.812	1.153	-1.425	0.12	1.316	1.147	-0.526	-0.334	-0.802	0.975	-0.802	-1.211	-0.839	0.586	0.265	1.01	0.399
GSM1855078	1.609	2.733	-0.331	1.3	0.719	1.514	0.988	0.522	0.304	0.46	0.033	1.491	0.636	-0.627	0.371	1.428	-0.165	-0.758	-2.282	-0.523	0.222	1.289	1.103
GSM1855079	1.78	1.76	-2.423	1.259	2.242	1.344	0.553	0.229	-1.258	0.524	1.999	-0.301	1.445	1.101	0.773	0.755	0.924	-0.597	0.106	0.958	0.945	-0.82	0.663
GSM1855083	1.907	-0.398	-0.938	-0.001	0.064	0.871	-0.25	0.187	0.407	-0.24	0.739	-0.808	1.179	0.481	0.369	0.12	1.054	-1.76	-1.876	0.23	-0.796	0.494	-0.192
GSM1855084	1.615	3.321	0.364	0.143	1.837	1.347	0.584	-0.931	-1.066	0.097	0.623	0.644	1.059	-0.273	-0.552	0.754	-0.041	-0.092	-1.441	-0.415	0.634	-0.169	2.27
GSM1855085	1.312	0.677	-2.474	-0.12	1.205	1.178	-0.416	-0.955	-0.757	0.317	1.307	0.818	0.635	-0.39	-0.431	0.631	0.696	-1.503	-2.765	-0.952	-0.207	-1.105	0.286
GSM1855089	1.237	1.437	-0.347	1.957	2.591	1.784	0.374	0.717	0.523	0.227	1.493	3.17	1.235	0.13	0.347	1.919	-1.464	0.786	0.603	1.284	1.323	2.599	0.36
GSM1855094	1.662	-0.027	-0.797	0.097	-1.276	0.251	0.292	-0.745	0.021	-0.653	-1.067	0.823	-0.044	-0.347	-0.283	-0.637	-0.842	-1.824	-2.787	-0.73	-1.016	1.257	1.618
GSM1855095	1.86	0.782	-0.294	1.505	0.441	1.557	1.156	-0.019	-0.666	-0.039	1.171	0.44	1.6	1.196	0.723	1.468	0.29	0.004	-0.792	1.201	-0.302	0.873	0.697
GSM1855096	1.87	1.217	-0.076	1.892	-0.089	0.346	1.444	0.504	0.609	-0.055	-0.771	-0.296	0.959	-0.539	-0.809	0.012	-0.001	-1.363	-2.97	-1.308	0.05	-1.12	2.559
GSM1855097	1.626	0.927	-0.355	-0.264	1.035	1.103	-0.154	-0.209	0.022	0.576	1.647	0.588	0.836	0.39	-0.538	1.33	-0.577	-1.146	-0.474	-0.937	0.429	2.463	-0.162
GSM1855101	1.435	1.154	-0.985	1.365	2.056	1.142	-0.547	0.181	-0.097	0.107	1.648	0.187	0.466	-0.096	-0.253	1.1	0.883	-0.272	-1.729	-0.058	-0.659	-0.423	-0.215
GSM1855103	1.833	0.686	-2.221	-0.646	-1.4	-0.974	-0.576	-0.785	-0.342	-0.131	-0.844	-1.28	-0.844	-1.35	-0.562	-0.024	-1.154	-1.78	-2.777	-1.793	-1.141	1.204	-1.521
GSM1855107	1.743	1.174	0.314	2.959	2.166	1.802	1.237	1.249	-0.275	0.524	0.712	1.663	1.474	0.663	-0.491	2.086	0.103	-0.312	0.303	0.865	0.252	1.281	1.114
GSM1855108	1.064	1.464	-1.494	1.329	-0.823	-1.113	-0.645	0.011	-0.245	-0.144	0.167	1.39	-0.263	-1.463	0.415	1.804	-0.501	0.389	-1.679	-1.192	0.782	-0.316	1.954
GSM1855109	2.043	2.761	-0.002	2.448	1.393	2.288	1.571	0.923	0.045	0.119	1.505	1.071	2.091	1.064	0.38	1.78	0.382	-0.832	-0.373	0.299	-0.135	-1.724	2.172
GSM1855114	1.67	2.757	0.412	2.616	1.922	2.071	1.834	1.052	-0.2	-0.344	-0.219	-0.731	1.88	-0.316	-0.13	1.404	-0.123	0.429	-1.656	0.966	0.832	-0.866	2.694
GSM1855116	1.46	1.209	-0.418	-1.026	1.086	0.215	0.796	-1.428	-0.136	-0.931	0.024	0.776	-0.983	-1.752	-1.177	1.102	0.164	-0.034	-1.874	0.097	-1.336	0.114	-0.829
GSM1855117	1.673	0.542	-1.097	0.749	0.416	0.494	0.662	0.025	1.055	-0.495	-0.831	1.437	0.416	0.387	0.123	0.413	-0.902	-0.422	-2.59	1.084	0.064	-0.338	2.089
GSM1855118	2.259	1.004	-1.084	0.318	-0.402	-0.525	0.21	-0.374	-0.546	-1.317	1.106	-0.132	0.045	-0.948	-0.042	-0.185	-1.157	-0.071	-1.976	-0.651	-0.086	1.034	2.434
GSM1855120	1.867	1.6	0.03	2.787	2.256	2.172	1.444	1.1	0.641	0.079	0.393	3.582	1.594	-0.504	0.203	2.33	0.313	0.52	-0.911	1.408	0.445	-2.06	1.04
GSM1855121	1.566	1.259	0.719	2.699	1.868	0.33	-0.533	1.83	0.017	0.258	0.113	0.011	-0.284	1.218	0.39	2.259	0.516	0.289	-1.603	-0.267	1.054	-0.422	1.861
GSM1855122	-0.454	0.792	-1.885	1.426	1.062	0.92	0.105	-0.139	-0.079	-0.84	-0.262	-0.266	0.675	-1.448	-0.639	0.864	-0.557	-0.789	-2.162	-1.178	-1.169	0.848	-1.322
GSM1855123	1.81	1.051	0.367	3.193	2.718	2.13	1.242	1.414	0.062	-0.021	0.837	2.777	1.987	0.783	0.268	2.339	0.384	0.835	-0.855	0.051	0.508	-0.829	1.767
GSM1855125	1.686	2.68	-1.687	-1.603	1.316	0.224	1.045	0.946	-0.785	0.837	2.087	2.651	-0.427	1.455	0.32	1.693	-0.642	0.351	-1.624	-0.312	0.675	1.276	-0.483
GSM1855128	2.074	1.521	-0.831	0.662	0.349	1.954	2.146	-0.776	0.935	0.428	0.725	0.337	2.116	0.498	0.152	1.185	-0.014	-0.236	-1.992	0.751	0.531	0.965	2.243
GSM1855131	1.733	0.407	-1.433	0.73	0.671	-0.158	-0.561	0.405	-0.086	-0.246	0.71	-0.031	0.252	1.042	-1.024	0.406	0.835	0.01	-1.069	-0.235	-0.608	-0.016	0.737
GSM1855132	1.936	2.345	-0.026	2.654	2.786	2.033	0.941	1.022	0.149	0.167	0.872	3.23	1.724	-0.674	-0.581	2.111	-0.018	-0.375	-1.624	1.954	-0.075	0.536	1.802
GSM1855135	1.655	3.166	-0.243	2.692	2.424	1.887	1.281	0.796	-0.634	-0.252	0.866	-1.106	1.8	0.775	-0.064	1.319	-0.066	-0.337	-1.803	-1.084	-0.602	0.216	0.614
GSM1855136	1.42	2.202	-0.423	2.371	2.054	1.195	-0.024	0.996	0.35	-0.391	0.454	-0.332	0.692	0.379	-0.46	2.272	0.191	1.133	-1.04	0.415	-0.072	-0.826	1.242
GSM1855137	1.45	2.316	2.001	1.525	1.299	1.016	1.525	0.21	-0.184	0.285	0.786	-0.952	1.425	1.285	-0.173	0.25	-0.538	-1.061	-2.466	-1.664	-0.241	-0.01	1.084
GSM1855138	2.087	3.168	-0.067	2.791	1.968	2.173	1.367	0.83	-0.121	-1.333	0.723	0.284	2.086	0.263	-0.02	1.484	0.571	-1.377	0.064	-0.875	-0.387	-1.525	2.848
GSM1855140	1.689	1.823	-0.341	2.43	2.571	0.499	-1.235	1.699	-0.616	0.788	2.057	0.485	-0.201	1.371	0.223	1.794	0.458	-0.118	0.467	1.267	0.727	-1.803	0.525
GSM1855142	1.74	0.815	0.121	2.787	2.14	2.161	1.699	1.167	-0.171	0.505	1.007	-0.218	1.912	1.005	-0.289	1.391	0.25	0.469	-0.839	-0.477	0.35	1.051	1.884
GSM1855144	0.488	1.636	-2.172	-0.433	1.376	-0.755	0.767	-1.392	-1.302	0.082	0.868	0.454	-0.524	-1.523	-0.89	0.387	0.788	-0.401	-1.988	-0.216	0.189	1.099	0.146
GSM1855145	1.865	0.467	-0.611	2.662	2.406	2.02	0.961	1.28	0.379	0.346	1.413	1.407	1.462	0.4	-0.286	2.104	-0.078	1.104	-0.728	-1.264	0.22	-2.095	1.216
GSM1855146	1.399	1.046	-0.104	0.912	1.806	1.57	0.262	0.157	-0.495	0.283	1.607	1.733	1.06	-0.953	-0.792	1.409	0.972	-0.607	-0.644	-0.857	0.489	-0.192	1.292
GSM1855147	2.191	1.349	0.544	2.905	2.177	2.176	1.74	1.192	0.035	0.377	1.073	0.091	2.187	0.315	-0.691	1.921	0.167	0.777	-1.115	-0.586	0.181	-1.4	1.452
GSM1855150	1.931	0.524	-0.138	-0.875	-1.115	-0.765	-0.678	-0.241	-0.25	-0.141	-0.239	1.111	-0.568	1.067	0.082	0.565	0.373	-0.997	-2.756	1.082	-0.868	1.424	0.755
GSM1855153	1.982	0.334	-0.294	1.161	1.134	1.273	1.363	-0.394	0.759	-0.738	0.194	0.266	1.636	-1.37	-0.777	-0.009	-1.079	-1.183	-1.925	-1.907	-0.042	0.734	2.215
GSM1855156	2.089	2.168	0.049	3.144	2.22	2.282	2.18	1.499	-0.353	0.55	0.692	1.371	2.162	-1.376	0.024	1.734	0.969	-0.037	-1.879	0.571	0.328	1.445	2.022
GSM1855157	1.581	1.214	2.306	1.76	2.265	0.173	1.379	1.204	-0.488	0.425	1.029	1.432	-0.482	0.105	-0.392	1.643	-1.093	0.086	-1.526	-0.206	0.466	-1.466	0.335
GSM1855160	1.618	0.514	-1.022	0.988	0.418	0.793	0.345	0.749	-1.167	-0.044	0.458	1.081	0.426	0.687	0.132	1.146	1.271	-0.53	-1.292	1.035	-0.447	-0.239	0.662
GSM1855161	1.846	0.605	-0.324	3.652	2.119	2.284	1.916	2.217	0.288	0.315	1.092	2.168	2.181	0.897	-0.495	2.064	1.85	-0.217	-1.668	-0.467	0.223	0.974	1.994
GSM1855166	2.222	1.091	-0.055	2.502	2.11	2.349	2.105	0.888	0.793	0.174	1.267	1.16	2.786	1.225	0.027	0.748	0.209	-1.392	-0.487	-1.209	-0.132	1	1.843
GSM1855168	2.093	3.291	0.462	3.133	2.234	1.26	1.14	1.729	-1.146	0.17	0.345	-0.051	1.43	-0.241	-0.103	1.721	0.535	-0.768	-2.038	0.212	1.291	-0.842	0.343
GSM1855171	1.479	2.523	-0.904	2.009	1.741	1.076	0.364	0.412	-0.619	-0.065	0.923	2.103	0.731	0.98	0.012	1.257	-0.067	-0.564	-2.2	0.653	0.199	-1.369	1.251
GSM1855173	0.74	-0.68	-0.375	0.714	-0.313	-0.518	0.656	0.7	-0.778	-1.137	-1.274	0.468	1.041	-1.528	-0.611	0.602	0.249	0.756	-0.913	-1.635	-0.21	0.592	1.997
GSM1855175	2.141	1.517	0.806	3.526	2.798	2.802	1.955	1.449	0.859	0.266	1.45	-0.056	2.604	1.046	0.438	2.571	0.633	-0.636	0.156	0.316	0.165	1.102	1.18
GSM1855176	2.13	1.083	-0.051	2.842	2.464	2.592	2.425	0.942	-1.282	0.247	1.134	1.253	2.769	0.958	0.308	0.969	0.102	-1.29	-0.458	-0.286	0.242	0.333	2.169
GSM1855178	1.865	1.367	2.166	0.518	0.514	1.439	1.163	0.074	-0.404	-0.294	-0.301	0.63	0.829	-0.201	-0.425	0.689	-1.344	0.04	-1.743	-0.835	0.994	1.183	2.398
GSM1855179	1.984	1.695	0.705	0.506	0.694	0.055	0.03	0.017	0.681	0.196	-0.007	-0.506	0.017	0.557	0.613	1.001	1.067	-0.1	-2.263	-0.866	0.924	1.991	1.419
GSM1855180	1.695	1.433	-0.087	2.269	2.01	-0.148	-1.263	1.752	-0.584	0.294	0.824	0.017	-0.472	0.449	-0.245	1.634	-0.707	-1.175	-0.574	0.598	0.078	0.884	1.596
GSM1855181	1.349	0.54	-1.082	0.258	0.297	0.262	-0.338	0.481	1.204	-0.629	-1.01	0.883	-0.674	0.007	-0.507	0.602	-0.394	0.558	-1.345	0.765	-0.181	1.754	1.382
GSM1855184	1.826	1.079	0.594	2.929	2.586	1.944	1.142	1.58	-0.253	0.474	0.821	-0.426	1.641	0.678	-0.258	1.891	0.449	-0.837	0.02	-0.045	0.46	-0.634	1.155
GSM1855185	2.292	0.607	0.294	0.393	0.728	1.465	1.412	0.542	-0.234	0.649	1.273	1.791	1.237	-0.092	1.648	1.879	-0.034	0.567	-1.172	0.267	0.085	-1.006	1.897
GSM1855189	1.496	1.841	-0.231	0.478	0.706	0.092	-0.756	0.648	-0.343	0.102	-0.598	-0.516	-0.78	-0.211	-0.426	0.881	-1.461	-0.462	-2.098	-0.534	-0.026	1.928	1.694
GSM1855190	1.929	1.339	-0.192	2.412	2.628	1.634	0.757	1.506	-0.514	0.505	1.846	0.761	1.514	-0.772	1.293	1.342	-1.043	0.212	1.187	1.177	0.547	-1.407	0.88
GSM1855193	1.919	3.688	-0.669	0.684	1.956	0.964	-1.07	0.381	-0.111	0.322	1.937	0.085	0.004	0.788	0.179	1.493	0.932	-0.502	0.147	0.818	-0.447	-1.722	1.018
GSM1855196	1.707	1.601	-1.919	-0.121	0.714	0.136	-1.318	0.406	0.173	-1.379	-0.991	-1.464	-0.744	-0.387	-0.218	1.596	-0.219	-1.384	-0.576	0.707	-0.3	0.23	1.308
GSM1855198	1.918	1.078	-0.625	0.764	0.331	0.058	0.093	0.178	1.128	0.179	0.446	1.054	-0.158	0.614	-0.358	0.767	1.226	-0.345	-1.094	-0.692	-0.12	-0.914	1.196
GSM1855199	2.089	2.187	-1.903	-1.118	-0.582	-0.099	-0.059	0.255	0.626	-0.039	-0.433	0.213	-0.532	-0.142	0.438	0.205	0.046	-0.763	-2.534	-1.265	-0.352	2.696	0.589
GSM1855202	1.657	0.39	-1.033	-0.977	-0.002	0.8	0.154	-0.046	0.645	-0.936	-1.28	0.434	-0.103	-0.35	-0.181	0.195	0.715	-1.201	-1.925	0.717	-0.812	0.281	0.156
GSM1855203	1.895	0.599	0.823	1.867	0.336	1.1	0.69	0.955	0.037	-0.39	-0.276	-0.47	0.55	-1.331	0.912	1.69	-0.305	-0.124	-1.386	-1.019	0.878	-0.463	2.782
GSM1855204	1.78	0.785	-1.22	-0.539	1.173	-0.786	1.103	-0.279	-0.39	-0.883	0.054	0.6	-0.706	1.183	-0.329	0.059	-0.414	-0.539	-2.26	-0.924	-0.548	2.028	0.529
GSM1855206	1.053	0.234	-1.547	0.788	0.506	-0.509	-0.119	0.629	-0.443	1.474	0.898	0.495	-0.415	-0.834	-0.548	-0.417	-0.737	-1.444	-2.714	-0.503	-0.765	-0.108	1.904
GSM1855207	2.393	1.273	-0.02	1.412	-1.344	0.714	1.423	0.094	-0.216	0.406	1.078	2.863	0.972	1.077	-0.711	0.419	1.201	-1.548	-2.787	-0.598	-0.602	0.311	1.506
GSM1855211	1.438	0.499	-2.01	0.813	0.817	0.977	-0.222	0.401	0.073	-0.039	0.204	-0.148	0.074	-1.521	0.329	1.278	-1.156	0.374	-1	-0.2	0.412	-0.377	2.754
GSM1855220	2.247	1.018	-1.444	-0.308	-1.223	0.193	-0.06	0.068	-0.736	-0.04	-0.055	1.401	-0.458	-0.419	0.298	0.458	0.87	0.852	-0.907	-0.476	-1.753	0.278	2.47
GSM1855224	1.391	1.317	0.558	1.29	1.571	1.255	0.894	0.597	0.727	0.354	2.127	0.481	1.432	1.316	1.23	0.724	0.713	0.455	-1.329	0.542	0.909	-1.291	0.645
GSM1855225	1.593	1.028	-0.357	1.413	0.358	-0.135	0.496	0.879	-0.373	0.004	-0.776	1.263	0.054	0.601	1.115	-0.482	-0.505	1.086	-0.418	-0.441	-0.418	-2.12	1.642
GSM1855226	1.425	0.843	-1.488	1.316	1.783	-0.971	-0.094	0.794	-0.89	-0.425	0.269	2.207	0.955	0.391	-0.609	1.345	-0.984	-0.147	-1.203	0.752	0.198	0.819	0.417
GSM1855228	1.744	1.51	1.305	-0.381	0.461	0.556	0.812	-0.616	0.694	0.423	-0.291	2.139	0.615	-1.407	0.433	0.818	-0.081	-1.018	-2.649	0.051	0.295	1.176	1.671
GSM1855230	1.583	0.573	0.095	1.635	1.854	2.459	2.077	-0.693	-0.376	0.415	1.302	-0.426	2.321	1.113	0.041	1.282	0.032	1.203	-0.582	0.331	-0.019	-1.211	1.158
GSM1855231	1.516	1.999	-0.271	0.091	0.567	0.035	-0.969	0.396	-0.91	-0.082	-0.092	2.786	-0.706	0.524	0.312	1.183	0.272	-0.233	-2.106	0.799	-0.221	1.146	0.888
GSM1855232	1.947	1.904	0.116	2.247	2.337	1.573	1.67	0.366	1.013	0.602	1.84	2.569	1.843	-1.035	-0.224	0.584	-0.061	-1.368	-0.338	-0.882	0.722	0.044	0.588
GSM1855234	2.439	0.767	1.346	1.634	1.946	1.724	0.511	0.099	-0.102	0.284	1.57	2.762	1.098	-1.128	0.076	1.757	-0.582	-0.338	-1.994	-0.866	-0.2	0.537	1.815
GSM1855235	1.884	0.796	-0.144	1.113	2.005	1.785	0.804	-0.846	-0.059	-0.043	0.686	1.542	1.437	-0.704	-1.066	0.998	0.998	-0.714	-1.904	-1.191	-0.413	0.917	1.903
GSM1855237	2.428	3.339	-1.307	0.005	-0.446	-0.13	-0.914	0.266	-0.379	-0.874	-1.115	1.009	-1.115	0.636	0.128	1.377	1.315	-0.336	-2.266	-0.866	0.727	0.906	1.995
GSM1855238	1.248	0.395	-1.709	-0.381	-0.096	0.081	-0.851	0.161	-1.062	-0.297	-0.253	1.287	-0.659	0.192	-0.135	0.923	0.715	-1.066	-2.3	0.7	-0.361	0.053	0.788
TCGA-MP-A4T9	4.795	1.255	-0.16	1.837	2.473	1.095	-0.586	1.333	-1.042	1.346	1.147	0.966	1.063	-1.277	-0.958	0.938	1.203	0.675	-0.999	-0.529	0.321	-1.976	0.605
TCGA-MP-A4TC	4.923	2.021	0.453	2.958	1.112	2.709	1.766	2.383	-0.433	3.69	1.752	1.853	3.624	0.842	-0.07	1.009	0.101	-1.295	-2.009	1.072	0.321	-1.078	-0.618
TCGA-MP-A4TA	4.833	1.48	-2.143	1.088	0.66	-0.147	-1.118	1.386	-0.91	2.386	-0.437	0.488	0.359	0.292	0.304	1.148	-0.521	-1.357	-2.384	-0.763	-0.141	2.853	-0.421
TCGA-L4-A4E5	4.353	0.554	-0.734	0.495	0.538	0.257	0.093	0.384	0.27	1.297	-0.441	1.144	0.81	0.539	0.814	-1.235	-1.262	-1.147	-1.471	-1.389	-0.583	0.433	-0.425
TCGA-MP-A4T8	4.346	2.465	-0.772	-0.747	-0.904	-0.877	-0.082	0.358	-0.02	-0.376	-0.766	-0.445	1.145	-0.404	0.099	1.018	1.097	1.213	-0.497	0.055	-0.358	1.648	-0.726
TCGA-MP-A4T7	4.882	1.266	-2.263	1.782	1.544	0.045	-1.114	1.557	-1.273	1.707	-0.3	0.836	0.338	-1.376	-0.437	0.294	-0.851	0.804	-0.757	1.241	0.901	1.949	2.09
TCGA-MP-A4SY	4.187	0.919	-3.236	-1.231	1.294	0.248	0.593	0.902	-0.01	0.581	0.781	-0.472	-0.834	-0.913	-0.775	1.385	0.104	-0.593	-1.848	-0.22	0.557	0.963	-1.77
TCGA-MP-A4SV	4.851	1.93	-0.787	3.361	2.613	2.726	1.604	2.124	-0.151	2.58	1.138	1.035	3.027	-0.562	-0.728	1.407	-0.248	0.333	-0.832	-1.778	-0.642	0.554	0.681
TCGA-MN-A4N1	4.24	1.202	-2.354	-0.974	1.541	-0.669	-0.866	-1.373	-0.728	0.363	1.076	-1.119	1.066	-0.272	-0.006	0.018	0.959	1.194	0.32	-0.796	-0.725	1.147	-1.76
TCGA-MN-A4N5	4.72	1.334	0.897	2.912	2.246	2.03	1.079	1.608	-1.236	2.326	0.58	0.547	2.511	0.153	0.992	0.091	0.35	-1.527	-2.281	-1.112	0.146	-0.767	0.214
TCGA-MN-A4N4	5.001	1.535	-3.202	0.279	0.418	-0.803	0.457	0.695	-0.532	1.316	-0.524	-0.296	-1.148	-0.063	-0.434	1.904	-1.44	-1.955	-1.933	0.838	-0.138	-0.533	1.417
TCGA-86-A4JF	5.594	1.543	0.425	2.139	1.418	1.175	1.124	1.518	0.777	2.764	1.288	-1.266	2.124	-0.159	0.393	-0.06	-0.185	-0.427	-1.608	-0.388	-0.42	-0.03	-0.081
TCGA-93-A4JP	4.998	2.144	-5.342	2.281	1.841	1.306	0.895	1.397	0.297	2	0.785	0.537	2.173	-2.266	-1.493	0.252	0.122	-0.943	-1.185	0.304	-0.072	-1.501	-0.872
TCGA-93-A4JQ	4.735	2.803	-0.055	3.958	2.265	2.62	1.892	2.402	0.286	2.671	0.972	0.629	3.059	0.184	-0.502	2.2	0.94	0.035	-0.923	-1.135	1.102	1.582	-0.472
TCGA-93-A4JO	4.974	1.787	-1.023	3.954	2.669	2.253	1.329	2.009	-0.872	2.508	0.716	0.476	2.628	-1.446	-1.217	1.289	1.413	-0.261	-1.208	-0.221	0.717	-0.625	-0.621
TCGA-44-A4SS	4.747	3.184	0.747	3.151	2.104	3.249	2.533	2.023	-0.836	2.603	0.75	-1.014	3.581	0.5	0.781	1.182	0.09	-0.35	-1.101	-0.521	1.516	-1.222	0.506
TCGA-MP-A4TK	4.837	1.591	2.307	3.144	2.891	2.112	0.531	1.396	0.25	1.704	0.895	-0.697	1.976	-0.947	-0.643	2.237	0.437	-0.586	0.463	1.094	0.333	1.531	1.176
TCGA-MP-A4TI	5.024	2.055	-0.899	4.686	2.523	3.907	3.305	3.891	-0.333	3.875	1.861	-0.523	4.639	0.428	0.964	1.553	0.63	0.414	-0.963	-0.785	0.338	2.693	0.423
TCGA-86-A4D0	4.601	0.774	-2.203	-0.378	-1.427	-0.305	-0.833	-0.211	-0.245	1.138	-1.089	-0.147	-0.064	-1.738	-0.744	-0.108	-1.518	-0.705	-1.841	-1.216	-0.849	1.572	-1.441
TCGA-62-A472	5.234	1.196	-1.435	2.565	2.189	1.667	0.517	0.991	-1.374	2.195	1.066	0.208	2.195	-0.05	0.562	-0.019	0.329	-0.195	-1.32	-0.603	0.526	-0.262	0.052
TCGA-J2-A4AD	4.48	0.67	-1.903	0.757	-0.44	0.511	-1.529	-0.922	1.343	-0.009	1.188	-0.035	-0.278	-1.386	-1.343	0.132	1.113	-0.797	-0.054	-1.143	-0.234	0.359	-1.818
TCGA-62-A46O	4.458	2.307	-2.793	-1.597	0.317	-0.568	-0.787	-0.14	0.891	0.66	0.681	0.76	-1.337	-2.344	-2.054	0.849	0.365	-1.383	-2.052	-1.253	-0.75	2.696	0.525
TCGA-62-8399	4.654	0.19	-2.589	0.235	1.338	-0.617	0.728	0.423	0.822	1.216	0.536	1.179	-0.54	-0.474	-0.192	-0.24	0.672	-1.05	-0.762	0.357	-1.171	2.582	1.849
TCGA-62-8394	4.942	1.672	-1.451	0.922	2.218	1.344	-0.383	0.381	0.056	1.517	1.162	0.428	0.659	-0.977	-0.426	1.179	0.769	-1.159	-1.39	-0.477	-0.411	1.493	-0.008
TCGA-55-8302	4.726	1.337	-0.092	3.095	2.518	1.814	1.3	1.771	0.216	2.69	1.713	-1.354	3.085	-0.313	0.549	-0.795	-0.104	-0.503	-1.671	-1.591	1.341	-1.609	-0.759
TCGA-95-8494	4.479	2.26	-2.605	0.196	1.217	-0.772	-0.028	0.53	1.123	1.964	1.203	0.268	-0.194	-0.49	0.248	-0.768	0.968	-0.069	-0.887	-0.869	-0.089	1.272	-0.249
TCGA-86-8358	4.757	3.74	-3.222	0.45	-0.891	-1.229	-0.405	0.625	-0.707	1.153	-1.102	-0.641	0.408	-0.98	-0.229	-0.808	0.762	-2.535	-1.947	-1.881	-1.202	1.879	2.044
TCGA-86-8359	4.188	0.938	1.585	2.414	1.45	1.505	-0.697	2.054	0.422	3.516	0.449	2.187	1.807	-0.47	0.1	0.904	0.082	-1.389	-1.922	-1.211	0.941	0.62	1.154
TCGA-62-A46V	4.848	1.571	-2.965	-1.418	0.728	-0.675	-0.318	-1.144	-1.123	0.751	0.801	-1.106	-1.362	-0.429	-1.083	0.912	0.308	-1.391	1.15	-1.01	-0.124	2.384	-2.53
TCGA-62-A46Y	4.729	2.397	-0.742	2.793	2.444	1.685	-0.127	1.915	-0.297	3.346	1.195	1.674	2.179	-1.374	-0.764	0.785	-0.462	1.023	0.178	0.378	0.428	0.081	-0.594
TCGA-97-8176	4.373	1.032	-3.545	-0.642	0.626	0.743	-0.911	-0.097	1.145	0.169	-0.488	0.656	-0.128	-1.453	-0.7	-0.189	1.327	-1.663	-2.66	-1.43	-0.23	2.113	0.3
TCGA-91-8499	4.065	1.071	-2.499	2.325	0.425	0.266	0.867	1.72	-0.101	1.877	-0.195	0.68	1.807	-0.671	-0.075	-0.548	-0.48	-1.642	-1.751	-1.619	-0.816	2.129	-0.038
TCGA-86-8673	4.817	1.759	-0.269	0.897	0.026	0.397	-0.913	1.287	0.174	2.695	-0.798	2.023	0.484	-0.529	-0.257	1.322	-0.705	-1.376	-2.082	0.323	0.202	2.533	0.366
TCGA-86-8674	4.119	1.17	-2.014	-0.751	-0.231	-0.74	0.892	-1.161	-0.844	-0.795	0.866	1.117	0.854	-0.658	-0.151	-0.526	-0.279	0.549	-1.508	-0.178	0.001	1.341	1.385
TCGA-86-8672	5.212	1.803	-0.593	3.198	0.442	1.516	1.356	2.463	-0.973	3.234	-0.414	-0.787	2.445	0.313	0.434	1.262	1.184	-0.977	-1.745	-1.224	0.622	0.813	0.899
TCGA-86-8585	5.003	1.69	-0.774	3.89	1.265	1.09	0.974	2.687	-1.264	2.329	-0.54	-1.117	2.13	-0.695	-0.606	1.126	1.061	1.099	0.411	-1.645	0.768	0.197	0.999
TCGA-78-8662	4.47	2.512	-2.335	0.5	0.234	-0.975	-1.247	0.45	0.322	1.022	-1.028	-0.087	-0.237	-0.671	0.161	-1.398	-0.593	-1.593	-2.233	-0.595	-1.44	1.521	-0.823
TCGA-50-5045	4.799	2.262	-0.488	4.523	2.742	3.07	1.732	3.18	0.721	3.647	1.554	2.114	3.54	1.028	0.494	2.296	0.763	-0.128	-0.735	0.12	0.636	0.575	-1.166
TCGA-97-8547	4.662	1.553	-2.543	-0.152	1.239	0.56	0.775	-0.364	0.455	1.895	1.378	-1.129	0.042	-0.013	-0.032	1.641	0.735	0.8	0.154	-0.275	0.558	1.173	0.754
TCGA-55-8508	4.245	1.578	-0.6	1.103	1.217	-0.319	0.648	1.311	0.332	1.93	-0.557	2.854	-0.5	-0.194	0.198	1.642	-1.216	-1.274	-2.126	-0.473	-0.306	2.302	0.356
TCGA-78-8660	5.344	1.836	-0.999	3.281	2.488	2.868	1.417	1.758	0.538	3.538	0.479	-1.263	3.264	-0.809	-0.383	1.682	0.14	0.079	0.089	-1.271	0.511	0.804	1.037
TCGA-55-8615	4.425	3.215	-1.15	-0.592	0.348	-0.802	-0.772	-1.004	0.096	-1.028	-0.421	1.61	-0.038	-1.067	-0.176	0.621	0.039	0.527	-0.867	1.095	0.048	2.1	-0.425
TCGA-55-8614	4.998	0.528	-1.821	1.396	2.167	1.118	-0.106	-0.132	-1.383	0.856	1.338	3.11	0.697	-0.636	-0.502	-0.03	-0.991	-0.306	-1.56	-0.925	-0.326	0.588	0.819
TCGA-55-8511	5.082	1.993	1.275	3.744	2.453	2.109	0.866	1.981	0.08	2.206	0.72	0.089	2.177	1.063	0.239	1.671	0.89	0.589	-0.297	-1.261	0.563	-0.711	-0.308
TCGA-55-8505	4.597	1.989	-2.301	-1.129	0.884	0.989	-0.562	-0.404	0.928	0.04	-0.826	1.425	0.055	0.164	0.221	0.116	-0.21	-1.631	-2.004	-0.847	0.301	1.848	1.395
TCGA-78-8655	4.806	2.239	0.468	2.948	2.399	1.689	0.61	1.666	-1.31	2.439	0.928	0.128	2.231	-1.248	-0.862	0.317	-0.252	0.513	-1.25	-0.273	1.21	0.871	2.048
TCGA-86-8278	4.886	2.332	-2.891	0.106	0.943	1.03	-0.373	-0.123	-0.872	2.294	0.97	-0.882	1.482	-0.996	-0.744	0.373	0.435	-0.567	-1.853	-1.088	0.723	0.916	1.172
TCGA-69-8253	4.754	1.05	-2.969	0.958	1.34	-1.003	-0.151	-0.049	-1.151	-0.232	-0.64	-1.157	1.028	-1.255	-0.302	0.047	0.421	-0.756	-0.384	0.43	0.566	0.85	0.405
TCGA-93-8067	4.668	0.263	-3.196	0.674	0.009	0.113	-0.748	0.804	-0.687	0.985	-0.218	-0.549	0.114	-0.187	0.679	0.093	-1.256	-0.636	-2.949	-0.626	-0.791	1.501	0.439
TCGA-55-8299	5.319	2.367	-1.183	4.237	2.207	2.848	2.032	3.184	-0.496	3.538	0.892	1.338	3.764	0.612	0.075	1.761	0.424	-0.79	0.373	-0.27	-0.113	0.037	0.601
TCGA-97-8179	4.727	0.912	-4.007	-0.605	1.118	-0.301	1.005	-1.119	0.339	-0.914	-0.231	0.056	-0.778	-1.422	-0.553	-1.258	1.022	-0.191	-2.106	0.203	-0.605	1.058	-1.51
TCGA-97-8174	4.581	1.878	-1.738	1.706	2.108	0.699	0.122	0.463	0.446	0.43	-0.019	-1.826	0.4	-1.927	-1.425	0.758	-0.872	0.578	-0.937	-0.927	-0.421	0.993	1.477
TCGA-83-5908	5.663	1.687	-1.959	4.4	2.346	3.119	2.936	3.093	0.752	3.562	0.959	1.59	4.634	0.616	0.713	0.149	0.913	-0.367	-1.169	-0.928	-0.491	1.545	0.814
TCGA-97-8175	4.83	2.527	-0.104	1.165	1.701	1.281	-1.081	0.543	0.837	1.697	0.869	2.251	0.572	-1.062	-0.216	0.842	-1.059	-0.671	0.754	-0.508	-0.103	-0.518	1.168
TCGA-73-4666	5.101	2.278	-1.857	3.066	0.52	1.858	2.507	2.495	0.136	2.913	-0.12	-0.971	3.563	0.685	1.08	-0.28	0.473	-0.469	-1.415	-0.302	-0.075	1.891	0.561
TCGA-75-5147	5.076	3.12	2.075	2.517	1.88	1.749	0.756	2.121	-0.027	2.804	1.709	1.732	2.323	-0.43	-0.286	1.35	-1.067	-1.161	-1.249	-1.497	-0.066	0.762	0.154
TCGA-80-5608	4.147	0.494	-2.956	0.837	0.994	0.411	-0.893	0.397	-0.474	0.315	-1.126	0.592	0.074	-1.404	-0.81	0.319	-0.762	-0.94	-2.56	-0.318	0.136	-0.046	0.426
TCGA-75-7027	4.516	0.78	-2.22	0.065	-0.341	-0.906	1.206	0.228	1.031	0.252	-0.701	-0.77	-0.879	0.511	0.715	0.416	-1.357	-1.472	-2.866	0.882	-0.326	1.407	-0.988
TCGA-91-6847	4.911	3.065	-2.135	-1.55	-0.083	0.375	0.37	0.937	0.164	-0.162	0.906	0.949	0.567	-1.136	-1.143	-1.128	-0.23	-1.463	-2.569	0.231	-2.657	0.07	-0.087
TCGA-67-6215	4.631	2.259	-4.273	-1.378	0.516	-0.194	0.541	-1.417	-0.602	-0.323	-0.335	0.111	1.153	-2.069	-1.073	-0.19	0.753	0.358	0.739	-0.084	-0.324	1.659	-0.62
TCGA-55-6978	5.14	2.283	-1.402	4.326	2.476	3.393	3.131	3.011	0.782	3.894	1.752	2.28	4.9	0.947	0.178	0.672	0.486	0.145	-1.15	-0.514	-0.002	2.227	-0.091
TCGA-50-6595	5.021	3.248	0.237	1.987	2.473	1.537	0.712	1.772	-0.233	2.447	0.846	0.758	2.409	-1.361	-0.923	0.467	-0.305	-0.499	-1.722	0.236	0.181	-0.402	1.412
TCGA-55-6986	4.54	2.411	-4.83	1.35	1.534	0.159	1.047	1.857	1.032	2.862	1.182	3.202	1.278	-0.959	-0.021	1.024	0.342	-0.69	-2.016	0.444	0.51	2.435	1.224
TCGA-55-8089	4.804	2.825	-2.182	4.552	1.817	3.048	2.914	3.326	-1.252	3.672	0.177	-1.348	4.383	-0.81	-0.337	1.243	0.831	0.301	-1.022	-0.635	0.851	1.976	1.625
TCGA-55-8204	5.043	2.286	-2.483	1.773	1.957	2.272	1.427	0.31	-0.33	1.122	0.661	2.282	1.974	0.037	0.448	0.883	-1.127	-0.43	-2.028	0.366	0.153	-0.284	-1.082
TCGA-55-8090	4.483	1.649	-3.734	1.08	1.623	0.817	1.236	0.213	0.377	1.528	1.131	1.033	0.12	-1.013	-0.587	1.096	-0.971	-0.847	-2.443	0.075	0.323	0.621	-1.197
TCGA-55-8205	4.95	3.062	-1.597	4.007	2.197	3.354	2.686	2.95	-0.776	3.84	1.434	0.233	4.366	-0.206	0.311	0.983	0.174	0.243	-0.94	0.304	0.289	1.697	0.05
TCGA-55-8094	4.518	2.723	-2.698	-0.583	-0.436	-0.76	0.311	-0.052	-1.311	1.239	-1.323	-1.178	0.722	0.411	-1.517	-1.512	1.191	-1.279	-1.551	1.314	0.37	0.948	0.567
TCGA-55-7913	4.314	0.567	-2.078	0.952	1.236	-0.053	-0.818	-1.167	-0.029	-0.032	0.988	2.309	-0.857	-0.815	-0.561	0.338	1.056	-0.779	-1.943	-0.231	0.321	1.254	0.113
TCGA-86-8075	4.968	2.168	-4.11	0.893	1.765	1.28	-1	1.049	0.119	2.378	1.502	3.852	0.929	1.229	0.141	2.013	1.054	-0.735	-1.582	1.394	-0.016	-0.642	-1.034
TCGA-55-8092	5.093	2.747	-0.977	3.032	1.403	1.32	1.585	2.152	-0.116	2.594	0.069	0.891	2.663	0.534	-0.654	0.089	0.251	-1.097	-2.149	0.793	0.99	0.908	0.267
TCGA-86-8074	5.308	2.465	-3.56	1.791	2.059	2.303	0.968	0.866	-0.723	2.691	1.724	0.093	2.654	-0.442	-0.491	1.103	1.298	0.621	-0.213	-0.602	0.204	0.062	-0.044
TCGA-J2-8194	4.368	1.706	-4.758	-0.085	1.498	0.387	0.949	-1.226	0.497	0.344	-0.037	3.387	-1.163	-1.022	-1.272	1.21	-1.228	-0.504	-1.848	0.866	-0.58	0.387	0.891
TCGA-99-8033	5.265	2.203	1.744	3.091	0.734	1.437	0.704	2.736	-0.564	3.184	0.514	3.093	2.414	-0.832	1.357	0.444	0.781	-1.302	-0.244	-0.06	0.235	-0.302	1.109
TCGA-J2-8192	4.768	3.156	-0.743	1.208	2.249	1.018	0.916	0.476	0.644	1.766	1.108	2.179	0.377	0.559	0.109	2.248	-1.32	1.193	-0.005	0.992	1.113	-0.16	-0.549
TCGA-86-8055	4.979	3.189	-2.242	1.51	1.922	1.851	-0.125	0.662	0.274	2.196	1.698	1.845	1.585	1.011	1.273	1.964	-1.296	0.536	-0.294	-1.107	0.458	0.858	0.217
TCGA-44-8117	4.817	1.579	-3.552	2.387	1.948	1.123	0.393	0.749	0.136	0.829	0.927	-1.404	1.547	-1.23	-0.963	-0.478	0.588	-0.852	-1.611	-0.174	-0.847	-1.004	1.915
TCGA-86-8054	4.547	2.176	-1.971	0.168	1.173	-0.681	-0.471	1.129	-0.169	-0.727	-1.434	-1.279	-0.265	-0.255	-0.283	-0.314	0.379	-1.78	-2.887	-0.438	-1.794	3.967	-1.194
TCGA-38-4631	4.723	1.544	-1.757	0.728	0.387	0.886	-0.081	0.376	0.059	1.211	-0.114	3.922	0.849	1.079	0.828	1.026	-0.634	-1.26	-0.49	0.555	0.118	2.812	2.278
TCGA-44-6145	4.673	2.651	-1.38	3.613	1.83	1.734	1.382	2.576	1.16	2.302	-0.777	-0.815	2.661	0.27	-0.434	1.096	0.869	0.242	-0.807	0.022	1.112	-0.769	0.596
TCGA-38-4625	4.902	1.427	0.062	2.079	0.647	1.458	1.852	2.167	1.103	2.938	0.433	-0.429	2.695	1.058	-1.572	0.593	-0.667	-0.814	-2.134	0.57	-1.251	-0.047	-0.219
TCGA-91-6831	5.153	2.993	-0.278	2.812	2.181	2.082	-0.106	2.639	0.239	3.561	1.374	2.735	2.628	0.358	0.312	2.202	-1.453	-0.481	-1.31	-0.377	0.106	-0.9	-0.764
TCGA-44-2665	4.155	2.708	-2.568	0.982	1.996	-0.744	0.455	1.044	0.317	1.331	0.438	0.095	-0.22	0.448	1.42	0.405	0.747	-0.476	-1.576	1.14	0.602	0.473	2.154
TCGA-38-4632	5.048	1.907	-1.038	3.229	2.261	1.715	0.609	1.842	-0.404	2.735	1.755	1.612	2.358	-1.249	-0.967	0.685	0.797	-0.279	-1.27	0.638	-0.206	0.241	-1.131
TCGA-05-4390	4.652	0.874	-2.321	-0.345	0.352	-0.02	1.04	-0.272	-0.057	0.886	-0.305	1.503	-1.127	0.686	-1.54	1.377	-1.499	-0.543	-0.629	-0.536	-0.735	1.301	2.157
TCGA-38-6178	4.326	2.07	-3.174	1.001	2.642	-0.018	0.769	-0.831	1.22	-0.641	0.382	0.762	-0.928	-0.579	-0.295	0.308	-0.314	-0.196	-1.224	-1.166	-0.161	-0.407	0.78
TCGA-05-4425	5.121	3.485	-1.676	1.953	1.523	2.872	1.473	1.297	0.544	2.411	1.294	0.064	2.656	-0.228	0.554	1.528	1.15	0.121	-0.33	-0.661	1.402	1.3	0.441
TCGA-95-7562	4.696	1.526	-4.061	1.623	0.23	1.856	1.632	0.492	-0.314	2.131	0.437	-0.915	1.983	0.312	-0.807	0.574	0.283	-1.06	-1.733	-0.849	-1.21	0.437	1.405
TCGA-55-8203	4.517	1.789	0.995	2.763	1.826	1.725	0.445	1.343	0.537	1.247	0.241	2.011	1.405	-0.77	-0.358	1.105	0.683	-0.255	-1.613	-0.582	0.897	1.143	2.435
TCGA-62-8398	4.747	2.38	0.007	1.396	0.871	0.571	-0.626	0.921	-0.079	1.334	0.101	0.803	0.163	-0.698	0.167	0.741	-1.23	-0.495	-1.547	-1.186	-0.972	1.64	-0.473
TCGA-50-8459	4.195	2.864	1.815	2.095	2.472	0.707	-1.098	1.069	0.333	0.77	-0.145	1.15	0.166	0.125	0.744	2.095	-0.205	-0.263	1.039	0.597	1.522	0.957	1.142
TCGA-55-A493	5.172	2.22	-0.895	4.045	2.257	3.33	1.987	3.124	0.468	3.534	2.321	-0.004	3.816	0.538	0.714	1.725	0.209	-0.643	1.117	-0.363	0.288	2.129	0.371
TCGA-44-A47A	4.433	2.493	-0.295	1.238	1.248	0.164	-0.502	-0.111	-0.526	0.502	-1.41	0.422	-0.331	0.336	1.039	0.187	0.27	1.072	0.602	-0.626	0.744	0.986	0.161
TCGA-55-A48X	4.493	2.795	1.586	3.541	2.745	1.36	0.288	1.497	-0.885	1.535	0.609	-1.453	1.522	-0.688	-0.794	1.541	1.354	-0.422	-1.291	-0.931	1.149	-0.169	2.438
TCGA-62-A471	4.482	1.247	-3.561	0.448	0.341	-1.174	0.494	0.964	0.569	0.598	-1.357	1.913	-0.71	-0.993	-0.028	1.228	-0.718	-1.246	-2.056	-0.338	-1.088	0.992	0.078
TCGA-44-7670	4.142	1.551	-3.256	1.422	1.619	0.483	-1.441	0.675	-0.068	1.227	0.641	1.552	0.2	-1.476	-0.988	0.495	-0.772	-1.513	-2.455	-0.671	-1.229	2.155	1.534
TCGA-44-7671	4.138	0.864	-3.934	-0.977	0.651	0.793	-1.055	-0.745	0.865	-0.478	-0.64	0.905	-0.177	-1.643	-1.049	0.062	-1.373	-0.226	-1.853	-0.329	-0.848	3.776	-0.341
TCGA-44-7660	4.494	1.879	-3.797	0.875	-0.129	0.025	0.008	0.155	-1.507	1	-0.988	-0.144	0.23	-1.159	-1.034	0.061	-0.008	-1.243	-1.698	0.362	-0.829	0.856	2.003
TCGA-44-7662	5.243	2.04	-0.305	2.599	0.699	1.554	1.065	2.177	0.226	3.058	2.265	2.57	2.879	0.041	-0.464	0.475	0.416	-0.543	-1.412	-0.725	0.484	-1.33	-1.531
TCGA-44-7661	4.901	2.74	0.321	3.108	2.635	2.747	1.069	1.928	0.368	2.233	1.226	1.527	2.558	0.141	0.817	1.689	-0.649	0.557	-0.849	1.04	0.488	-0.613	-0.276
TCGA-86-7953	4.277	2.669	0.283	1.756	1.651	1.075	-1.453	1.618	0.251	3.327	0.865	3.136	1.2	-0.268	0.071	1.088	-0.814	0.524	-0.402	-1.205	0.324	0.824	-0.066
TCGA-95-7948	4.5	1.536	-3.22	-0.379	0.762	-1.07	0.771	-0.399	-0.856	0.452	0.436	-0.596	-0.833	-0.081	-0.725	-1.157	-1.015	-1.254	-2.816	-1.406	1.058	0.888	-0.578
TCGA-44-7672	4.957	2.111	-0.065	4.479	3.365	3.288	1.497	2.717	0.887	2.842	1.415	-0.048	3.24	-0.028	-0.24	2.171	1.198	1.099	-0.715	-0.513	0.621	1.162	0.065
TCGA-53-7624	5.285	1.89	-3.442	1.235	0.066	1.703	2.108	0.193	-1.269	2.465	0.636	0.181	2.605	-1.126	-0.99	0.007	0.282	-0.671	-0.534	-0.77	-0.791	-0.499	-1.341
TCGA-86-7955	4.13	1.085	-1.417	0.791	-1.218	0.452	0.699	-1.489	0.032	-1.111	0.638	-0.797	0.508	-1.264	-0.999	0.472	-1.104	-1.605	-1.846	-1.285	-1.532	0.81	1.576
TCGA-95-7944	5.004	1.977	-1.41	3.98	1.917	2.465	2.695	2.968	-0.265	3.903	0.561	0.593	3.917	0.239	-0.009	-0.165	0.762	0.103	-1.254	-1.155	0.814	-0.43	0.559
TCGA-64-1679	4.86	2.44	-3.201	-0.632	0.97	1.413	-0.505	-0.73	-0.016	2.411	1.513	0.995	1.145	-0.302	-0.078	1.779	0.294	-0.506	-0.874	-1.004	0.311	-0.037	-1.404
TCGA-95-7947	4.43	2.6	-3.926	1.706	1.415	1.309	0.508	0.538	-0.318	0.545	-0.753	0.177	0.654	-1.354	-0.858	0.613	-0.203	-0.72	0.199	-0.745	0.383	-0.969	1.005
TCGA-73-7499	4.824	1.488	-0.142	3.967	2.297	2.455	2.343	2.593	0.541	3.306	0.907	1.116	3.596	0.822	0.011	-0.083	0.316	0.935	0.232	-1.119	0.651	0.676	-0.005
TCGA-69-7980	4.415	2.148	-0.046	3.201	2.809	2.556	1.66	1.318	0.972	1.884	0.461	0.001	2.681	-1.607	-1.09	0.224	0.477	-0.352	-1.182	-1.588	1.633	-1.367	-0.577
TCGA-69-7979	4.308	3.055	-2.897	0.13	1.063	0.284	-0.258	-1.178	-1.019	-0.252	-0.588	0.259	0.33	-0.799	-0.876	-1.391	-0.618	-1.767	-2.766	-1.408	-0.463	2.143	1.634
TCGA-69-7978	4.916	3.018	-1.798	4.139	2.763	3.427	1.785	2.927	0.586	3.752	1.613	-0.159	3.632	0.288	0.854	2.25	0.112	0.563	-0.287	-0.051	0.985	1.965	-0.489
TCGA-55-7994	4.451	2.603	-1.772	3.603	2.713	2.518	2.001	2.027	0.411	3.111	1.14	-1.245	3.765	-0.366	0.06	-0.411	-0.097	0.876	0.089	-0.716	0.811	2.002	1.696
TCGA-69-7973	4.067	0.954	-2.643	-0.025	0.863	-0.664	-0.061	-0.802	-1.073	-0.902	0.114	-0.007	1.064	0.222	1.071	0.973	-0.656	-1.027	-2.362	-0.531	-0.391	1.618	0.868
TCGA-44-7667	4.126	2.843	-2.695	0.282	-1.152	-0.75	0.237	0.899	-0.653	1.464	-0.085	-0.791	0.96	-0.255	-0.529	-0.467	0.67	-0.974	-1.741	1.126	0.101	1.582	-1.139
TCGA-44-7669	4.887	1.7	-4.11	1.41	1.087	0.716	0.501	0.464	1.242	1.5	-0.503	-0.57	1.073	-0.427	0.21	0.122	-0.674	-1.5	-2.16	-0.257	-0.939	1.497	0.11
TCGA-50-5066	4.715	0.611	-2.862	-0.123	0.945	0.016	-0.107	-1.085	0.286	1.181	-0.635	0.788	-0.125	-0.776	-0.5	0.315	-1.436	-1.084	-1.616	-0.124	-0.232	1.082	1.212
TCGA-50-5946	5.201	1.132	-1.467	1.746	0.664	0.972	0.748	0.692	0.449	1.357	0.765	0.061	1.734	-1.392	0.114	0.264	0.082	-1.56	-1.659	1.22	-0.934	1.114	1.464
TCGA-50-5933	5.062	2.783	0.327	2.31	1.256	2.027	1.463	2.133	0.481	3.423	1.893	1.115	3.305	0.654	0.438	0.473	1.012	-0.142	-0.969	0.716	0.925	-1.146	0.232
TCGA-55-7726	4.588	2.04	-1.693	0.93	0.729	0.714	-0.451	0.436	0.04	1.599	0.633	2.067	0.374	-0.732	0.749	1.606	-1.161	-0.037	-0.909	-1.383	0	0.942	0.066
TCGA-55-7724	4.292	2.716	0.664	3.007	2.478	2.173	0.586	1.521	-0.316	1.86	0.597	1.782	2.169	-0.189	0.603	1.609	0.183	0.136	-0.957	1.204	0.611	-1.374	-1
TCGA-38-4627	5.129	3.254	0.857	1.717	2.073	2.441	0.61	1.999	-0.213	3.072	1.467	0.926	2.544	0.619	1.001	1.928	0.033	0.056	-1.107	-1.144	1.215	0.443	0.135
TCGA-44-3396	4.661	3.325	0.35	2.71	2.91	2.045	0.252	1.682	-0.927	2.364	1.154	0.801	1.828	0.325	1.132	1.646	-1.122	1.272	0.047	-0.969	1.082	-0.354	-0.437
TCGA-44-2668	4.368	2.895	-0.108	1.4	2.577	0.184	-0.685	1.673	-0.788	2.654	1.278	1.471	-0.015	-0.721	-0.292	1.344	0.672	1.216	-0.347	0.357	1.067	-0.022	-0.785
TCGA-69-7763	4.2	1.652	-2.457	0.645	2.034	-0.834	-0.037	0.179	1.415	0.575	0.517	0.85	-1.246	-1.563	-0.922	0.698	-1.136	0.018	-1.493	-0.403	0.745	1.345	-0.753
TCGA-69-7760	4.042	0.549	-1.968	0.998	0.922	-0.237	-0.709	0.896	0.009	-0.318	1.051	0.964	1.018	-0.859	-0.792	-0.151	0.503	1.075	-0.397	0.971	-0.321	1.976	-2.339
TCGA-55-7911	4.512	1.461	-1.771	3.734	2.251	3.585	2.142	2.243	0.444	3.299	1.908	-1.177	3.758	-0.592	-0.038	1.176	0.438	-1.285	-1.374	-0.752	-0.163	-0.417	0.699
TCGA-55-7903	4.937	1.953	0.528	2.392	1.334	2.312	0.825	1.767	-0.035	3.192	1.301	-0.002	2.624	-0.394	-0.166	0.561	-0.794	-0.155	-0.996	0.37	0.123	0.958	0.327
TCGA-86-7701	4.726	2.039	-0.208	2.86	1.126	1.044	-0.098	1.946	0.759	2.397	-0.145	1.724	1.137	-0.115	0.624	2.249	0.585	-0.335	-1.48	1.232	0.462	0.928	-0.41
TCGA-78-7542	5.283	2.12	-3.757	1.392	-0.691	1.399	1.708	1.236	1.317	1.917	0.564	0.987	1.962	-0.316	0.808	-1.515	-0.186	0.128	-0.95	-0.97	-0.683	-0.927	-0.674
TCGA-86-7713	4.452	2.999	-2.543	-1.027	1.094	0.717	-1.168	-1.288	-0.535	-0.329	0.686	0.711	-0.839	-1.071	-0.159	0.298	0.798	-0.504	-1.711	-0.115	-1.659	1.926	0.649
TCGA-95-7567	4.83	1.491	-2.723	2.748	1.517	2.65	1.35	1.927	0.145	2.65	1.442	-1.293	2.596	-0.067	0.109	1.022	0.015	-0.262	-1.566	-1.22	0.386	1.577	0.217
TCGA-78-7166	4.685	1.296	0.119	2.351	0.736	0.691	0.044	1.029	0.026	0.947	-0.86	1.078	0.532	-1.31	-1	0.623	1.217	0.13	-1.121	-1.24	0.839	3.129	1.225
TCGA-69-7974	4.628	2.605	-1.025	3.105	1.925	3.076	1.361	2.284	0.434	3.732	1.26	0.457	3.476	-0.855	-0.414	1.469	-0.735	0.353	0.264	0.607	0.343	-0.039	-0.038
TCGA-78-7147	4.613	1.882	-1.941	1.951	2.308	2.028	1.912	0.842	-0.069	1.938	0.933	0.389	2.666	-1.59	-1.262	-0.892	1.266	-0.415	-1.069	-0.84	-0.285	0.048	0.397
TCGA-78-7148	4.737	2.074	-1.41	1.286	1.286	1.028	-0.469	1.034	-0.012	1.468	-0.491	0.751	0.395	-1.74	-0.899	0.55	-1.191	-0.937	-1.883	0.344	-0.078	1.68	-0.041
TCGA-49-4486	4.369	1.666	-2.34	-0.364	0.496	1.039	0.318	-0.792	0.473	-0.196	-1.058	0.557	0.891	-2.3	-1.888	-1.187	-0.326	-0.774	-2.393	-1.006	-0.427	3.372	1.017
TCGA-49-4494	4.69	1.664	0.636	2.158	1.627	2.409	1.565	1.069	-0.769	1.945	0.893	-0.529	2.518	-0.818	-0.389	0.13	-0.216	0.259	-0.301	-0.797	-0.597	1.022	0.247
TCGA-86-6562	4.662	2.009	-3.747	0.516	1.353	-0.165	0.677	0.804	-0.279	1.483	0.068	-0.249	-0.643	-0.586	-0.309	1.697	0.893	-0.864	-2.257	-0.409	0.169	-0.625	0.471
TCGA-05-4396	3.755	0.552	-2.576	-0.978	0.273	0.431	-1.01	-0.526	0.081	0.003	-1.418	1.188	-1.165	-2.179	-1.295	0.255	0.756	-0.834	-1.138	-1.234	-0.573	3.109	0.348
TCGA-05-4415	5.317	1.62	-2.664	0.086	0.484	0.183	-0.272	1.273	-0.162	1.856	-0.48	0.316	0.804	-0.241	0.822	-0.464	0.496	-1.541	-2.438	-0.113	-0.774	1.092	1.29
TCGA-50-5939	4.983	2.611	0.501	2.441	1.44	0.67	-0.728	1.933	0.133	2.658	0.2	1.401	0.727	0.551	1.236	1.688	0.411	-0.91	-1.725	1.014	0.591	1.746	1.256
TCGA-55-5899	5.312	1.743	-3.808	1.642	0.263	0.424	0.892	1.354	-0.532	2.407	-0.318	0.852	1.811	0.249	0.992	-0.757	1.37	-1.641	-1.536	-0.551	0.383	0.59	-0.757
TCGA-55-6970	4.894	2.34	1.236	2.341	1.716	1.659	1.096	1.239	-1.193	1.621	0.171	1.182	1.748	-1.205	-0.447	0.772	-0.31	0.711	-0.429	-0.278	0.546	0.822	2.199
TCGA-75-6214	4.882	1.347	-4.69	0.97	-1.082	-0.595	1.209	-0.536	-1.396	0.468	-1.243	0.395	-1.289	-0.323	-0.495	-1.123	0.546	-1.899	-1.733	-1.01	-0.213	-0.896	0.349
TCGA-55-6981	4.722	0.968	-2.431	0.721	2.041	-0.024	-0.887	-0.652	0.188	0.595	1.381	1.242	1.004	-0.148	0.392	0.784	0.312	-0.673	0.443	1.33	0.051	-1.162	-0.46
TCGA-55-6980	4.963	2.674	-0.615	2.824	2.823	1.973	1.22	2.465	1.205	3.226	1.133	1.146	3.154	-1.03	-0.596	0.216	0.214	1.369	0.047	0.406	1.693	-0.642	-0.574
TCGA-38-4628	4.4	1.65	-4.843	-0.642	1.337	-0.913	-0.348	-1.32	0.909	1.179	0.859	-0.088	-0.949	0.779	0.644	-0.237	-0.351	0.967	-0.314	-0.473	1.088	-0.217	-0.346
TCGA-38-4630	4.154	1.283	-4.583	-1.151	1.198	-0.405	0.513	-1.183	0.567	1.204	-1.325	-1.125	0.574	-0.398	-1.032	-0.259	0.977	-0.773	-2.07	-0.642	-0.648	-0.606	-1.413
TCGA-91-6830	4.938	2.761	0.629	2.511	2.253	2.03	0.823	1.755	-0.914	2.515	0.672	0.5	2.274	-1.058	-1.124	1.113	-1.108	-1.799	-2.274	1.262	0.726	0.655	-1.236
TCGA-75-5125	4.974	2.508	-1.271	3.092	1.702	2.562	2.171	1.755	-1.227	2.899	0.679	-0.762	3.274	0.76	0.734	0.563	0.087	1.041	0.172	0.124	0.194	1.895	-0.867
TCGA-50-5936	4.95	1.962	-2.659	0.837	0.943	-1.077	0.69	0.845	1.242	1.458	1.194	-0.359	-0.85	0.57	0.683	0.694	-1.248	-1.347	-0.263	-1.326	0.801	1.619	1.013
TCGA-78-7145	4.646	1.714	-2.962	-0.224	2.016	0.285	0.642	-0.387	-0.635	1.471	1.745	-0.155	-0.064	0.207	1.057	0.023	0.116	-0.554	0.481	0.248	-0.023	1.278	0.508
TCGA-78-7154	4.693	3.168	-4.343	0.943	1.799	0.376	-0.061	-0.189	0.689	0.809	0.425	-0.139	0.38	-0.822	-0.401	-0.228	-1.086	-1.084	-2.204	-0.85	-1.373	1.328	-0.563
TCGA-78-7220	4.795	1.072	-2.344	-0.249	0.325	-0.923	-1.465	-0.11	-0.15	0.253	-1.204	-1.073	-0.729	-0.535	-0.301	1.071	-1.311	-2.076	-2.019	-0.947	-0.777	1.941	0.184
TCGA-78-7146	4.915	1.668	-3.472	1.395	0.537	0.978	0.525	1.452	1.223	2.341	1.384	1.132	1.876	0.171	0.742	-0.679	-1.482	-0.06	-0.913	0.262	-0.648	-0.115	2.348
TCGA-78-7536	4.774	0.969	-3.013	0.275	-0.567	1.409	1.162	-0.232	-0.708	2.612	-0.63	-1.523	1.638	-1.331	-1.455	1.125	-0.77	-1.449	-1.818	-0.872	-0.8	0.081	2.425
TCGA-86-7711	5.071	3.601	-3.87	1.766	0.384	0.669	-0.446	2.294	0.02	3.61	-0.635	3.899	1.299	-1.185	0.649	1.654	-0.379	-0.695	-1.115	-0.105	-0.327	1.22	-0.979
TCGA-78-7150	4.956	1.21	-2.551	-0.083	-0.402	-0.716	-1.397	0.906	0.869	1.299	-0.11	0.142	-0.437	0.553	0.137	-0.405	-1.277	-0.932	-1.627	-1.164	-0.119	1.831	1.89
TCGA-78-7160	4.906	2.33	1.356	3.251	2.004	2.262	1.422	2.574	-0.373	2.861	0.29	-0.65	2.754	-0.444	0.284	1.475	-0.502	1.005	-0.454	0.358	0.871	0.889	-0.676
TCGA-44-2662	4.953	3.234	-1.318	2.441	2.075	2.505	0.53	2.929	0.09	3.878	1.539	2.643	3.079	0.281	0.696	2.119	0.114	-0.467	-1.629	-0.317	0.161	-0.468	-0.106
TCGA-55-7570	4.578	3.245	-3.001	-0.428	0.548	0.553	1.219	0.237	-0.495	0.08	-1.313	-0.064	-0.917	-1.034	-0.255	-1.215	-1.38	-2.067	-3.255	-0.864	-0.507	0.186	1.052
TCGA-55-6985	4.591	3.573	0.01	2.364	2.448	1.298	1.132	2.773	0.241	3.803	1.216	3.498	1.661	0.166	0.606	2.181	0.844	0.846	-0.61	-0.705	0.892	-0.281	-0.762
TCGA-73-4676	4.681	3.445	-1.773	1.796	1.618	1.075	1.087	2.775	0.255	3.874	1.404	2.507	1.776	0.389	0.863	2.223	0.793	-1.247	-0.164	-1.052	0.575	-0.161	0.137
TCGA-55-6984	4.414	2.755	-1.761	0.313	1.213	0.217	-1.155	1.226	-0.021	1.873	1.037	1.078	0.709	-0.878	-0.348	-0.14	-0.23	0.202	-1.155	-1.593	0.396	0.794	1.842
TCGA-55-6968	4.589	3.932	-1.092	2.607	2.433	-0.075	-1.098	1.74	0.949	1.978	-0.106	-0.532	0.172	0.947	-0.903	0.672	0.847	1.082	-0.232	-1.005	1.032	0.9	1.984
TCGA-55-6982	4.849	2.247	0.385	2.502	2.425	2.874	1.583	1.057	-0.047	2.618	1.526	0.1	2.751	-0.3	-1.045	1.297	-0.058	0.62	-1.162	0.832	0.536	1.18	0.23
TCGA-38-4629	5.22	2.703	-1.345	3.485	1.69	2.09	2.045	2.693	0.567	3.548	1.82	1.255	3.534	-0.798	-0.149	0.279	0.334	-0.08	-0.537	0.428	0.73	-0.074	-1.518
TCGA-44-5644	4.158	2.429	-2.644	-1.543	1.069	0.982	-0.558	-0.627	-0.266	-0.258	-1.096	1.114	0.498	-0.963	-0.039	0.212	1.238	-1.686	-1.818	-0.887	-1.474	4.37	-0.373
TCGA-55-7574	4.612	1.745	-0.351	3.727	2.038	1.807	0.546	2.615	0.892	2.243	-0.151	1.16	1.708	-0.196	0.431	2.54	1.114	0.354	-0.51	-1.554	0.737	0.178	-0.139
TCGA-91-6848	5.156	2.591	-0.152	2.896	0.817	2.156	1.377	2.53	0.305	3.062	0.439	-0.767	2.476	-0.378	0.259	1.932	-0.381	-0.166	-1.212	-0.54	-0.637	1.686	-0.454
TCGA-95-7043	4.175	3.652	-3.988	-0.853	-0.522	1.005	0.311	-1.19	0.15	-0.844	-1.466	-2.13	0.649	-1	-0.558	-0.502	0.001	-1.416	-2.816	-1.412	0.467	-0.363	-1.913
TCGA-55-6975	4.201	2.083	-1.23	1.487	1.994	-0.747	-0.213	1.69	0.68	2.363	1.057	1.783	0.048	-0.571	0.008	0.916	-1.335	-1.08	-1.505	-0.172	0.076	0.133	-0.54
TCGA-55-6979	4.543	3.189	-1.482	3.838	2.644	2.561	1.2	3.078	-1.405	3.677	1.063	1.417	3.342	-0.381	-0.053	1.442	-0.194	0.716	-0.464	0.927	1.437	-0.039	-1.16
TCGA-49-6761	4.324	2.98	-0.297	0.395	1.454	1.314	-1.015	0.847	-0.558	2.003	1.343	-0.462	0.981	-0.896	0.514	1.502	-0.207	0.686	-0.854	1.246	0.056	0.333	1.259
TCGA-91-6836	4.238	3.374	0.134	1.122	0.903	0.685	-1.355	2.483	-1.178	3.062	0.925	1.468	1.463	-1.161	-0.716	1.561	-0.38	-1.002	-1.731	1.275	0.765	-0.47	-0.209
TCGA-44-5643	4.102	1.551	-2.369	2.516	1.825	0.997	-0.017	0.708	-0.723	0.281	-0.056	0.762	0.912	-0.025	0.691	0.134	0.13	-0.011	-1.155	-0.697	-0.231	0.261	0.6
TCGA-50-6594	4.678	2.826	-3.924	-0.867	0.447	-0.117	1.1	-0.705	1.161	0.381	0.576	0.288	-0.364	-0.341	-0.166	0.006	1.071	1.086	0.734	-0.505	0.66	0.65	0.874
TCGA-35-5375	4.788	1.403	1.571	2.185	1.179	1.307	0.925	1.257	-0.999	2.372	-0.53	0.847	1.907	0.327	0.279	0.612	-0.109	0.3	-0.288	-1.033	0.038	0.958	-1.696
TCGA-05-4434	4.878	2.685	-1.413	4.071	2.684	2.178	1.771	2.81	0.281	3.028	1.201	-1.243	3.321	-1.387	-1.18	0.417	0.646	0.241	-0.423	-1.063	0.965	-0.057	-1.144
TCGA-50-6591	4.203	2.993	-2.001	-2.205	0.144	-2.336	-2.534	-0.394	0.566	-1.163	-0.394	0.183	-2.837	-1.892	-1.603	0.262	-0.61	-2.305	-2.26	-0.516	-3.233	4.115	-3.704
TCGA-50-5930	3.962	3.373	-1.043	-0.444	0.707	-1.153	-1.239	0.643	1.041	1.443	0.649	0.346	-1.291	-0.603	0.098	0.999	-0.397	0.932	-0.868	0.712	0.858	-0.287	-0.149
TCGA-50-5931	4.797	1.016	-1.829	-0.264	-0.205	0.397	-0.567	-1.181	0.553	-0.377	0.278	0.108	0.706	-1.104	-1.193	-0.279	0.247	-1.985	-2.823	-0.204	-1.558	3.286	-1.064
TCGA-05-4398	4.655	2.917	-0.758	3.339	2.449	2.985	1.334	2.183	0.348	3.312	2.069	1.941	3.186	0.409	0.501	1.508	0.132	-1.182	0.788	0.938	0.242	0.24	1.406
TCGA-05-4402	4.49	2.35	0.155	0.9	1.912	1.163	-0.787	0.498	-0.038	1.874	1.33	0.341	0.413	-1.419	-1.103	1.109	-1.016	-0.663	-1.64	-0.267	0.243	-0.062	0.456
TCGA-05-4397	4.656	2.214	-4.444	-0.963	-0.802	1.171	0.869	-1.035	-0.542	1.224	-0.878	-0.282	1.035	-1.183	-1.365	0.728	0.951	0.275	-0.005	-1.282	-0.614	1.139	1.395
TCGA-50-5932	4.201	1.374	-3.092	0.864	0.468	1.217	-0.083	-1.483	0.388	-1.133	1.145	-0.252	0.325	-1.074	0.006	-1.494	0.55	-0.441	-1.447	0.619	-0.101	3.218	-0.746
TCGA-49-6767	4.326	1.543	2.358	3.222	1.273	3.233	3.313	2.232	0.57	3.11	0.932	0.92	4.275	-0.2	-0.432	-1.026	0.726	0.819	0.002	-0.835	0.588	-0.208	0.043
TCGA-67-3771	5.44	1.878	0.686	2.551	1.351	1.741	1.251	1.536	-0.083	1.923	-0.169	-1.154	1.771	-0.383	0.125	1.589	-0.134	-0.768	-1.146	-0.532	0.94	2.088	-1.682
TCGA-49-4490	4.751	2.709	-0.391	1.865	1.594	1.088	0.509	1.875	0.18	2.319	1.057	-0.68	2.196	0.01	0.444	0.17	0.9	-0.661	0.564	0.409	0.544	-0.555	1.175
TCGA-64-5815	4.986	2.991	1.444	1.974	2.752	1.219	-1.305	0.957	0.292	1.579	1.542	-1.246	0.561	0.666	1.008	1.808	-0.883	0.261	-0.417	0.387	0.852	1.79	0.641
TCGA-44-6779	4.589	3.952	-1.41	2.775	1.394	2.449	2.638	1.337	0.791	2.639	-1.063	0.014	3.265	0.667	0.395	0.63	0.964	-0.451	-1.802	0.283	0.877	0.715	0.617
TCGA-73-4675	4.377	1.413	-2.037	-0.503	0.763	0.699	-1.267	-0.246	-1.468	-0.678	-0.924	-0.272	-0.319	0.656	0.665	-0.241	-1.013	-0.179	0.711	-0.774	0.989	1.467	0.612
TCGA-64-5774	4.417	1.797	-2.749	-0.542	-0.089	-0.342	0.297	-0.711	0.109	-0.144	0.162	1.215	-1.089	-0.487	-0.324	1.006	-1.424	-0.613	-2.043	0.218	-1.452	1.697	-0.152
TCGA-49-4507	4.632	2.539	-0.392	3.577	-0.352	1.855	1.814	2.828	0.004	2.768	1.251	0.351	2.828	1.149	1.427	1.3	1.755	-0.043	-1.484	-0.52	1.011	1.151	1.621
TCGA-64-5775	4.864	1.294	-4.242	-0.323	-0.193	-1.056	0.731	-0.033	-0.928	1.954	-0.146	1.621	-0.472	0.919	-1.434	-0.431	-1.29	-1.041	-2.326	0.107	-0.18	-0.135	1.064
TCGA-73-4670	5.076	2.093	-3.114	-0.226	-0.581	-0.416	1.175	0.451	-0.202	0.706	-0.681	0.899	-0.966	0.805	1.171	0.874	-1.345	1.205	-0.76	0.035	0.333	0.925	1.735
TCGA-73-4677	4.372	2.203	-2.237	1.315	1.871	-0.272	0.851	0.833	-0.871	0.811	-0.549	1.126	-0.34	-1.576	-0.879	0.774	-0.751	0.956	-0.557	0.066	0.081	0.919	0.639
TCGA-80-5611	4.862	3.119	-0.56	1.687	-0.042	1.709	1.783	1.242	-1.194	3.387	0.458	0.02	2.46	-1.154	-0.735	0.493	-0.049	-0.089	-0.728	-1.006	0.947	-0.23	0.102
TCGA-49-6742	4.452	1.788	-3.966	-1.148	0.503	0.932	-0.076	-0.488	0.749	0.133	-0.786	0.817	0.59	-1.051	-0.404	-1.154	1.055	-0.669	-2.367	-0.633	1.287	1.674	0.415
TCGA-50-5072	4.796	1.688	-2.095	0.438	1.149	-0.581	0.661	0.015	-1.053	0.311	-0.551	0.338	-1.251	-0.145	0.298	0.614	-0.986	-0.937	-2.184	-1.418	-0.525	2.566	-1.272
TCGA-64-1677	4.885	1.499	2.147	3.57	2.043	2.405	1.501	2.392	0.219	2.474	0.727	2.451	2.815	-0.796	-0.411	1.228	0.542	0.144	-0.711	-1.169	-0.853	0.957	0.057
TCGA-50-6590	5.397	2.543	-1.687	3.899	1.752	2.007	2.382	2.988	-0.216	3.542	0.166	-1.091	3.623	0.121	0.823	-0.087	0.868	-0.582	-1.416	-1.024	0.39	-0.509	-0.18
TCGA-73-4659	4.315	0.982	-4.31	-1.312	0.018	-1.109	-0.584	-0.397	-0.468	0.11	-0.455	-0.772	0.3	0.168	0.891	1.019	0.315	-1.55	-2.488	0.46	-0.46	1.684	-1.74
TCGA-49-4506	4.67	1.982	-0.435	3.182	0.754	1.383	0.823	2.579	0.531	2.086	-0.411	2.189	1.884	-1.264	0.832	1.906	0.69	0.145	-1.391	-0.175	1.326	1.381	0.753
TCGA-64-5781	5.176	3.21	-0.381	3.301	0.498	1.461	1.58	2.748	1.152	3.208	-0.392	1.793	2.993	-0.885	-1.36	0.461	1.337	0.458	-0.55	1.221	1.676	0.706	1.376
TCGA-49-6744	4.385	3.312	-1.209	3.519	3.165	2.641	0.875	2.363	0.369	2.493	1.098	-0.111	2.439	-0.108	-0.084	2.034	0.161	0.26	-0.834	1.08	1.468	0.919	-0.702
TCGA-49-6743	4.819	2.26	-2.868	1.621	0.792	1.033	-0.291	1.25	0.248	1.804	-0.223	1.486	0.626	0.626	0.351	1.675	-0.114	-1.425	-0.21	-1.122	-0.473	1.384	1.84
TCGA-55-1596	4.479	1.571	-1.894	0.235	0.61	-0.735	-0.435	-0.087	-0.424	1.019	-0.137	0.676	-0.207	0.262	0.101	-1.221	-1.046	0.073	0.748	-1.112	-0.339	2.102	1.563
TCGA-64-1678	4.384	3.001	0.928	-1.267	0.116	0.837	0.169	-0.761	-0.107	-1.481	0.219	-0.152	0.51	-0.852	-0.309	0.905	-0.466	-1.591	-1.986	-0.809	-1.776	1.125	0.796
TCGA-49-6745	4.41	2.962	-1.063	1.756	2.395	1.868	1.456	1.557	-0.066	1.75	0.695	0.193	2.545	-1.375	-0.668	-0.125	-0.681	1.228	0.071	0.275	0.966	-1.134	0.923
TCGA-67-3774	4.413	1.834	1.338	2.283	2.325	1.575	0.366	1.026	-0.454	1.174	0.065	-1.118	1.104	-2.061	-1.325	1.261	-0.103	0.366	-0.861	0.2	0.169	1.02	1.192
TCGA-05-5429	4.403	1.975	-1.078	-1.024	0.509	-0.469	0.419	-0.537	0.29	-0.251	-0.702	1.472	1.137	0.872	-1.345	0.794	0.793	-1.018	-0.788	-0.907	1.398	1.512	0.379
TCGA-05-4420	4.235	0.731	-1.96	1.033	-0.352	-1.192	-0.479	-0.54	-0.57	0.277	-0.434	2.984	0.561	0.168	-0.464	0.799	0.47	-1.724	-2.047	0.762	-1.71	1.129	-1.013
TCGA-05-5425	4.706	1.707	-1.482	3.698	2.125	2.552	1.89	2.859	-0.677	2.881	-0.01	2.708	3.377	0.114	0.724	1.194	0.48	0.32	-0.318	0.212	0.522	0.035	-0.186
TCGA-50-5941	4.819	3.198	-1.297	4.12	2.384	3.473	2.818	2.918	-0.114	3.321	0.473	2.36	3.933	-0.111	-0.397	1.48	0.969	-0.358	-1.096	-1.2	0.98	1.772	-0.398
TCGA-55-1595	4.622	1.616	-1.59	2.562	1.526	1.019	0.853	1.366	0.728	1.82	0.271	-0.94	2.074	-1.009	-0.693	0.252	-0.341	-0.4	-1.579	-1.118	0.229	1.447	-0.228
TCGA-95-7039	4.318	1.438	-3.412	2.411	2.86	1.323	0.628	0.506	0.057	0.37	0.455	-0.964	1.575	-0.979	-0.688	-0.495	-0.102	-0.597	0.4	-1.176	0.233	0.091	1.245
TCGA-50-5044	5.014	0.891	-0.505	2.642	-0.617	1.372	1.404	2.012	-0.986	2.007	-0.745	0.372	2.247	-0.199	0.443	-0.295	1.23	-0.964	0.109	1.385	0.406	1.342	0.643
TCGA-05-4418	4.757	2.207	-0.513	2.758	0.846	1.177	1.078	1.995	-0.93	2.074	0.105	0.04	1.798	-0.007	0.422	0.548	0.409	0.681	-0.341	1.258	0.781	1.869	-0.747
TCGA-55-6712	4.429	2.397	-1.415	3.764	1.821	1.751	1.901	2.342	1.016	2.238	-0.254	-0.546	2.558	0.126	-0.314	0.796	1.072	-0.633	-1.389	1.037	0.432	1.683	-0.561
TCGA-05-4250	4.701	1.718	-0.104	3.388	1.678	1.716	1.233	2.476	0.98	2.735	0.294	0.53	2.95	0.943	-1.108	0.414	0.157	0.123	-0.795	-0.948	1.425	-0.252	-0.033
TCGA-44-3398	4.404	1.934	-0.89	2.38	1.523	0.667	-0.945	2.009	0.567	2.953	1.039	1.295	1.127	0.765	0.895	2.329	-0.205	-0.316	1.239	-0.751	0.893	0.484	1.273
TCGA-44-4112	4.825	0.995	-0.701	0.239	0.438	-0.287	1.204	1.265	-0.21	2.013	0.05	0.665	-0.129	0.681	0.532	1.997	0.194	-0.7	-1.165	-0.636	-0.297	2.228	0.966
TCGA-35-4122	5.305	2.833	-1.078	3.796	1.929	2.766	1.913	2.816	-0.302	3.841	2.502	2.224	3.76	0.177	0.35	1.526	0.024	0.93	0.139	1.306	1.274	0.006	-1.021
TCGA-35-4123	4.922	1.722	-0.079	4.497	2.037	2.924	2.184	3.243	-0.652	4.386	2.446	1.025	4.215	-0.716	1.034	0.919	0.645	-0.728	-0.49	1.223	0.591	2.954	0.219
TCGA-64-1680	4.417	1.747	-3.723	-0.215	0.91	-0.471	0.83	-0.328	1.399	0.205	-0.57	-0.762	-0.652	-1.961	-1.012	-0.147	1.109	0.182	-0.462	-1.508	0.901	1.399	0.179
TCGA-35-3615	4.479	0.819	-2.676	0.963	0.62	-0.576	-0.994	0.583	1.012	1.195	-0.712	0.088	-0.259	-1.484	-0.529	-0.729	-0.124	0.822	-1.011	-0.51	0.028	1.609	-0.012
TCGA-MP-A4T4	4.825	1.921	-0.819	4.357	2.703	3.308	2.564	2.614	-1.386	3.564	1.559	-0.588	4.143	0.404	-0.353	1.083	0.706	0.641	-0.162	-1.261	1.302	-0.03	-0.062
TCGA-69-A59K	4.349	1.41	0.361	2.747	0.757	0.713	0.682	1.231	0.734	1.618	-0.022	-0.1	1.795	-0.922	-0.405	-0.209	1.397	-0.402	-0.934	-0.085	1.032	-1.086	-0.152
TCGA-MP-A4TF	5.401	1.042	-1.774	0.391	-0.939	1.418	1.517	0.812	-1.072	1.634	0.212	0.927	2.131	-0.466	0.497	-0.462	0.69	-0.953	-2.143	0.332	-0.378	0.46	0.544
TCGA-NJ-A4YF	4.141	2.718	-2.419	0.668	-1.249	0.736	0.809	0.808	0.846	-0.131	0.949	0.174	-0.958	-0.648	0.066	0.054	-0.412	-1.561	-1.999	-0.639	-0.726	1.763	0.246
TCGA-95-A4VK	3.911	1.391	-1.007	2.39	1.764	0.231	0.052	0.996	0.872	0.767	-0.769	0.488	0.559	-1.436	-0.752	-0.071	0.766	1.194	-0.307	-1.324	0.652	1.026	-0.035
TCGA-95-A4VN	4.949	2.231	0.73	3.757	2.136	2.938	1.708	2.471	0.72	3.284	0.982	1.443	3.216	-1.156	-0.663	1.696	0.07	0.843	-0.359	-0.776	0.135	1.866	0.603
TCGA-NJ-A4YP	4.672	1.044	-1.228	1.926	0.973	2.37	1.293	1.351	0.116	2.22	0.495	1.461	2.168	0.882	0.241	2.083	-0.6	-1.314	-0.332	-1.033	-0.085	1.873	-0.061
TCGA-49-AARN	4.243	1.642	-2.776	2.247	2.356	0.284	1.241	0.231	-0.621	1.161	0.784	0.347	-0.043	-0.205	0.288	0.96	0.798	0.042	-1.293	-0.93	0.694	1.461	1.257
TCGA-49-AAR4	4.38	1.11	-0.522	4.153	2.562	2.776	1.361	2.686	-0.926	3.22	1.163	0.833	3.012	-0.7	-0.806	1.245	0.663	-1.042	0.729	-1.425	1.039	1.157	-0.514
TCGA-55-A57B	4.072	1.916	-2.842	-0.046	2.015	-0.32	0.339	-0.008	-1.535	1.392	0.945	0.674	-0.595	-1.627	-1.319	0.549	-0.226	-0.614	1.197	-0.614	-0.009	0.803	0.997
TCGA-49-AAR3	4.698	1.965	-0.604	4.741	2.389	3.234	3.423	3.238	0.446	3.787	1.525	1.531	4.703	0.098	0.301	0.322	1.454	1.294	0.578	-1.321	0.899	3.131	0.143
TCGA-73-A9RS	5.018	2.829	-2.577	-0.037	-0.662	-0.792	-0.837	-0.777	0.962	-0.776	0.296	0.165	-0.764	-1.286	-0.598	-0.732	-0.527	-1.391	-2.586	0.195	0.047	0.861	2.31
TCGA-L9-A743	4.606	1.584	-0.863	4.497	2.975	2.945	1.411	3.051	0.635	3.303	1.552	1.337	3.319	0.664	0.571	2.072	0.552	0.138	-0.796	-0.483	0.583	0.126	-0.649
TCGA-L9-A8F4	4.898	1.201	0.466	3.959	2.061	1.878	1.6	2.642	1.217	3.063	0.579	-0.005	3.042	-0.173	0.29	0.715	0.638	0.073	-0.689	-0.743	0.532	1.468	0.94
TCGA-NJ-A7XG	3.894	0.725	-2.293	1.087	1.538	-0.335	-0.788	0.273	-0.454	-1.296	-0.133	-0.335	0.496	-2.321	-1.107	-0.336	0.833	-0.062	-1.331	-0.741	0.139	0.805	-0.017
TCGA-49-AAR9	4.731	2.178	-4.458	-0.248	-0.906	-0.377	0.016	-0.911	-0.079	0.589	0.813	-0.41	0.363	-1.203	-0.322	0.858	-0.605	0.048	-0.476	-1.525	-0.129	1.287	0.236
TCGA-49-AARE	4.766	0.834	-2.61	2.601	0.568	0.576	1.089	1.16	0.899	1.3	-0.002	-1.614	1.336	0.565	-1.176	0.535	1.076	0.538	-0.796	-1.794	0.975	0.822	0.715
TCGA-49-AAQV	4.585	1.543	-0.884	2.731	2.131	1.143	-0.668	1.329	0.243	2.009	0.868	-0.017	0.856	-1.088	-0.71	1.172	0.604	0.75	-0.371	-0.013	0.039	1.147	1.187
TCGA-55-A48Y	4.791	1.358	-2.752	1.604	0.988	0.607	-0.413	0.837	-0.35	0.795	-0.672	1.436	0.162	1	0.326	1.499	-0.055	-1.001	0.26	0.015	-0.142	1.169	2.245
TCGA-L9-A5IP	4.567	2.295	-2.372	0.018	-0.35	-0.134	1.267	0.825	-0.619	0.975	-0.8	2.927	-0.401	-0.865	-0.479	0.421	1.048	-1.246	-1.757	0.039	-0.178	0.374	-1.516
TCGA-55-A490	4.231	0.77	-1.92	1.987	1.077	0.394	-1.146	1.644	-1.123	2.271	0.904	-0.935	0.803	0.642	0.417	0.027	-0.746	-1.409	0.307	-0.88	-0.765	1.009	-1.627
GSM773549	0.065	2.568	0.76	-0.136	1.935	2.357	2.007	0.821	1.168	1.403	-0.181	-1.109	2.051	-2.079	-2.331	0.173	-0.91	-1.594	-1.735	-0.714	-0.806	0.289	-0.822
GSM773553	-0.721	0.187	-0.78	0.203	0.003	0.052	0.617	0.983	0.229	0.815	1.228	1.183	0.743	0.905	-1.087	0.831	-0.195	-0.999	-1.313	-1.61	-1.746	-1.648	1.422
GSM773554	-0.636	0.401	0.145	1.203	0.559	1.848	0.466	0.594	-0.189	-0.316	0.805	-0.831	0.585	-2.296	-2.184	0.389	-1.247	-2.964	-2.038	0.326	-0.505	-1.23	1.731
GSM773561	0.312	1.466	1.263	1.255	2.281	2.843	2.007	-1.425	-1.054	0.426	-0.506	1.207	2.278	-1.494	-1.795	0.864	-1.262	-0.673	-1.192	-0.503	-0.324	-0.338	0.083
GSM773564	0.156	1.675	-0.141	1.114	1.928	1.807	1.181	-1.546	1.207	0.889	-0.713	0.058	1.279	-1.79	-1.572	0.224	-0.231	-1.188	-2.588	-1.295	-0.07	-0.605	-0.949
GSM773567	-0.249	-0.334	-2.093	-0.091	1.086	1.639	-0.075	1.024	0.186	-0.859	-0.358	0.123	0.117	-1.864	-1.477	1.75	-0.779	0.347	-0.349	0.275	0.002	-0.64	-2.505
GSM773569	0.096	0.008	-1.256	1.049	1.358	1.797	1.368	-1.441	-1.257	0.415	1.1	-0.869	1.265	-2.509	-2.846	0.503	0.109	-0.823	-1.484	-0.753	-1.067	1.632	-0.321
GSM773690	-0.337	2.077	0.501	-0.414	1.229	0.705	-1.094	1.143	-0.547	-0.906	-0.526	0.776	-0.91	-1.742	-2.487	1.254	0.798	0.354	0.261	-0.474	-1.778	0.047	-0.29
GSM773691	-0.33	1.008	0.961	0.236	1.632	0.804	-0.839	1.133	-1.266	0.892	-0.932	1.236	-0.259	-2.733	-2.483	0.322	-1.239	0.207	-0.869	-1.32	-2.323	-0.436	-0.62
GSM773693	-0.452	-0.48	1.121	-0.563	1.518	0.687	1.423	1.185	0.758	-1.514	0.165	0.021	-0.393	-1.5	-1.19	0.446	0.097	0.815	-0.49	-0.506	-0.667	0.657	-0.662
GSM773695	0.106	1.55	-0.144	0.651	1.739	1.198	0.131	-1.038	0.581	-0.725	0.414	0.414	0.733	-0.211	-1.539	0.888	0.855	-0.645	-1.22	-0.225	-0.911	-0.248	2.375
GSM773696	-0.406	1.352	1.128	-0.833	0.443	0.324	-1.323	0.215	1.178	0.73	-1.577	-1.531	-0.775	-1.717	-2.155	0.014	-1.147	-1.022	-1.559	-1.322	-1.201	-1.641	2.004
GSM773698	0.098	0.741	0.759	0.495	1.255	1.542	2.015	1.165	-1.252	0.735	-1.237	-0.269	1.869	-0.807	-1.112	-1.319	-0.961	-2.704	-2.061	-1.038	-0.812	0.554	-0.58
GSM773699	-0.084	1.485	0.127	-0.986	0.762	1.471	0.463	0.566	-1.114	-0.394	0.176	2.551	0.574	-1.18	-1.683	0.871	-0.723	-1.55	-2.215	-0.703	-0.854	-0.822	0.618
GSM773701	0.07	1.626	1.074	0.092	1.693	1.604	0.764	-1.223	-0.152	0.824	-0.727	-0.174	1.139	-1.492	-1.549	-0.247	0.188	-0.928	-1.778	-0.42	-1.669	0.049	0.762
GSM773704	-0.238	1.092	0.771	1.394	1.831	2.12	1.453	-1.06	1.015	0.508	-1.17	-0.385	1.418	-1.883	-1.364	0.663	-0.189	0.517	-0.036	-1.549	-0.542	0.507	2.183
GSM773705	0.19	2.428	0.833	-0.366	1.715	2.136	1.764	0.678	0.457	-1.685	-0.22	0.532	2.02	-0.978	-0.925	0.653	-1.604	-1.175	-2.149	0.327	-0.768	-0.914	-0.747
GSM773706	-0.182	1.769	0.058	0.639	0.533	0.175	-1.143	0.04	-1.183	0.165	1.251	0.27	-0.685	-1.529	-1.906	-0.909	-0.673	-1.679	-1.501	-1.386	-0.293	-0.516	0.516
GSM773707	-0.237	2.042	-0.037	-0.569	1.885	1.321	-0.144	1.309	-1.141	-0.243	0.703	-0.826	0.611	-1.265	-1.425	1.02	-2.025	0.349	-1.436	-0.085	-0.226	0.049	-0.033
GSM773708	-0.857	0.193	1.263	-1.174	0.721	0.477	0.905	1.166	-0.77	-0.03	0.932	-0.655	-0.993	-2.14	-1.345	-0.339	0.002	-2.417	-2.524	-0.489	-2.036	1	2.59
GSM773709	-0.24	0.864	-1.148	1.778	2.04	2.727	1.818	-0.54	-0.034	0.964	-0.908	-0.18	1.795	-2.143	-2.342	1.875	0.294	0.088	-0.998	-0.982	-0.637	1.552	0.673
GSM773710	-0.456	2.701	1.324	-0.012	1.598	1.449	0.528	0.965	1.097	0.629	-0.806	-1.344	1.01	-2.321	-2.481	-0.203	0.481	-0.177	-1.389	-0.761	-0.659	0.821	1.072
GSM773711	0.015	-0.196	0.964	-0.303	1.546	1.601	0.821	1.41	0.531	-1.367	-0.326	-1.388	0.97	-1.285	-1.658	0.73	-0.087	-1.47	-1.651	-0.757	0.027	-0.03	-0.918
GSM773712	-0.179	0.361	0.377	0.689	0.545	0.336	-1.219	0.633	-0.449	-1.586	-0.317	-0.808	-0.415	-2.234	-2.282	-0.564	-1.56	-2.238	-2.822	-1.591	-2.051	-0.195	-0.006
GSM773713	-0.053	1.332	0.354	0.13	1.613	1.665	1.04	-1.312	0.974	1.186	-0.89	-0.232	1.017	-0.503	-0.688	0.351	0.568	-1.221	-1.574	-1.363	-1.026	-1.977	-0.228
GSM773714	0.208	1.124	0.51	0.424	0.992	0.382	1.209	-0.173	1.111	-1.479	-0.884	-1.438	-1.094	-2.016	-2.323	-0.32	-1.398	0.263	-0.729	-1.22	-0.454	0.315	1.228
GSM773719	-0.127	1.51	0.618	-0.102	1.634	0.656	-0.62	1.048	0.518	0.926	-0.49	1.08	-0.037	-1.134	-2.479	0.744	1.293	-1.966	-2.426	-0.923	-1.518	-1.19	0.525
GSM773721	-0.143	1.929	0.203	-1.058	1.196	1.036	-0.01	1.282	0.102	0.829	-0.7	0.955	0.515	-2.098	-1.746	-0.163	-1.048	0.669	-0.835	-0.151	-1.081	-0.087	0.891
GSM773726	0.141	2.311	1.239	0.14	1.925	1.776	1.15	1.502	-0.26	1.235	-0.167	-1.322	1.547	-1.221	-1.148	-0.294	0.002	-0.171	-0.761	0.001	-1.155	0.047	-2.097
GSM773728	-0.243	1.985	2.722	-0.041	1.507	1.46	0.342	1.347	1.226	1.287	-0.567	-1.063	0.641	-1.449	-1.776	0.368	1.253	-0.441	-1.685	-0.916	-0.744	0.492	-1.412
GSM773731	0.085	2.051	0.654	-0.742	1.375	1.693	0.862	0.746	0.385	-0.742	0.984	-0.228	1.226	-2.463	-1.775	-0.777	-0.466	0.091	-0.674	-0.431	-1.497	-0.296	0.117
GSM773732	-0.259	1.666	1.027	-0.82	1.019	0.291	-0.736	0.527	0.64	0.835	-1.208	-0.233	-0.434	-1.912	-1.531	-0.309	0.33	0.291	-1.099	-0.65	-1.3	0.03	0.963
GSM773733	0.096	2.207	0.274	0.471	1.595	1.623	1.153	1.592	0.449	0.752	-0.891	-0.99	1.332	-2.675	-2.693	-0.052	-1.108	-0.52	-0.627	-1.024	-1.292	-0.614	-1.463
GSM773734	0.193	1.785	1.167	0.527	1.534	1.741	1.31	0.982	-1.067	-0.086	-1.082	-0.287	1.851	-1.625	-1.345	-0.352	-0.751	-1.725	-2.239	-0.152	-0.778	-1.021	0.361
GSM773735	-0.402	1.226	1.014	0.985	1.106	0.2	0.58	0.831	0.819	1.349	-0.361	0.752	-1.086	-2.408	-2.417	0.304	-0.978	0.23	-0.851	0.153	-1.856	-0.109	-0.023
GSM773737	0.191	2.678	0.996	1.217	1.999	2.675	1.656	-1.42	0.543	-0.46	-1.33	-0.863	1.924	-2.499	-1.99	1.461	-0.262	-1.195	-1.755	-0.992	-1.858	-0.035	-1.905
GSM773738	-0.51	-0.43	0.338	-0.117	0.968	-0.077	-0.521	0.725	-0.31	-0.8	-0.141	-1.083	-0.489	-2.921	-1.766	1.214	-0.75	-0.234	-0.944	-1.131	-1.813	0.581	0.878
GSM773739	-0.117	0.396	0.164	-1.042	0.538	0.007	0.859	1.279	-1.078	0.693	1.081	0.528	-1.126	-1.865	-2.051	1.002	0.755	-1.774	-1.897	-1.324	-1.217	0.028	-1.735
GSM773744	-0.137	0.336	0.329	-0.123	0.843	-0.119	-0.954	1.231	-0.51	-0.406	0.021	-0.019	-0.826	-2.054	-2.222	-0.613	-0.497	-0.974	-1.349	-0.915	-1.449	-0.181	0.52
GSM773746	0.437	0.212	0.783	0.953	1.689	2.232	1.6	-1.672	-0.885	-1.372	-0.318	-0.724	1.647	-2.364	-2.775	1.104	-0.69	-1.203	-1.75	0.01	-0.688	0.382	0.751
GSM773747	-0.502	-0.644	-0.092	0.193	-0.005	-0.871	0.602	-0.268	-0.895	1.086	-0.707	-1.155	-1.399	-1.267	-1.494	-0.294	0.575	-2.586	-2.068	-0.565	-2.822	-1.672	0.831
GSM773748	-0.738	2.003	2.42	0.78	1.578	0.778	-0.238	-1.221	-1.146	0.162	-1.187	-0.928	0.19	-1.293	-1.026	0.815	-0.877	0.735	-0.153	0.034	-1.084	0.745	1.843
GSM773750	-0.463	2.52	0.971	-0.181	1.32	1.457	0.681	1.241	0.521	0.821	-1.193	-1.273	0.933	-2.3	-2.388	0.382	0.806	-0.59	-1.543	-0.731	-0.833	-0.621	1.199
GSM773752	-0.627	0.761	0.088	0.08	0.387	-0.653	0.203	0.746	-1.19	0.307	1.203	-0.772	0.926	-2.724	-2.178	-1.288	-0.46	-1.445	-1.204	-1.504	-0.938	-0.482	0.988
GSM773753	-0.051	2.292	1.073	0.183	1.481	1.928	1.337	1.642	-1.278	0.271	-1.082	-0.963	1.57	-2.599	-2.314	0.613	0.875	-0.763	-1.401	-0.659	-0.647	-0.758	-0.983
GSM773755	0.07	0.988	0.345	-1.153	0.96	0.422	-0.402	0.592	-1.445	0.555	-0.996	-0.374	0.087	-1.918	-1.584	0.634	-0.41	-1.083	-1.857	-1.481	-0.77	-0.386	-0.842
GSM773757	-0.118	1.539	0.018	0.082	1.802	1.765	0.741	1.386	1.171	0.894	-0.531	1.833	1.145	-2.253	-2.504	0.506	-0.299	-1	-1.669	-1.075	-0.679	-1.949	-0.132
GSM773758	-0.001	2.008	0.392	0.578	1.12	0.247	0.082	-1.506	-0.959	0.627	0.838	-1.36	0.043	-2.094	-1.722	0.65	-0.811	-1.17	-2.159	-0.444	-0.072	0.49	0.189
GSM773759	-0.568	1.378	0.063	1.19	0.082	-0.195	-0.909	-0.561	-1.141	-0.272	-0.074	-1.712	-0.766	-2.543	-2.804	0.829	-1.493	-2.158	-2.513	-1.716	-0.66	-1.133	1.046
GSM773760	-0.286	2.428	-0.344	0.095	1.158	0.857	0.116	1.658	0.018	0.668	0.898	-0.16	0.193	-2.163	-1.972	0.244	-1.069	1.083	0.295	-1.011	-0.247	-0.12	1.085
GSM773761	0.025	1.169	1.534	0.96	1.72	0.393	-0.927	-1.315	0.496	1.35	-0.626	-0.179	-0.442	-1.584	-1.718	0.753	-0.217	0.627	0.16	-0.692	-0.633	0.654	-1.531
GSM773762	0.108	0.771	1.092	0.189	1.136	0.66	-0.069	1.31	1.206	0.908	-1.008	-0.102	0.201	-2.623	-2.057	0.796	-1.099	-1.681	-2.074	-1.229	-1.507	0.698	-0.821
GSM773763	0.065	1.527	0.188	-0.548	1.664	1.559	0.008	0.956	-1.072	-1.327	0.154	0.769	0.632	-1.769	-1.647	1.141	-1.028	0.026	-0.715	0.371	-1.157	-0.055	-1.126
GSM773765	-0.46	1.941	0.594	0.848	1.943	0.549	-1.03	1.567	0.688	-1.553	-0.112	0.245	-0.234	-1.959	-2.482	0.828	0.067	-0.989	0.093	-0.66	-0.5	0.346	-1.037
GSM773594	-0.089	1.313	0.926	1.408	1.931	1.233	0.138	-1.169	1.133	-1.204	0.108	0.987	0.661	-1.04	-1.828	1.18	-0.182	-1.832	-0.829	-1.285	-0.809	-0.972	1.489
GSM773595	-0.309	1.916	0.522	0.383	1.698	0.458	-0.084	1.602	-0.03	1.279	-0.842	-0.078	0.019	-1.561	-1.335	0.15	1.429	-0.862	0.188	-1.142	-0.921	0.179	-0.002
GSM773596	0.099	2.532	1.43	-0.193	1.909	1.747	0.721	1.714	-1.273	-0.183	0.429	0.558	0.972	-0.684	-1.686	1.48	-1.085	-0.87	0.084	-0.462	-0.274	-0.233	0.348
GSM773602	0.358	1.095	0.369	-0.581	1.346	1.45	0.536	1.049	0.439	1.528	-0.485	1.024	0.827	0.352	-1.765	0.498	-0.277	-1.037	-1.301	0.215	-1.064	-1.282	-2.212
GSM773606	0.055	1.677	-0.297	-1.344	0.971	1.372	0.032	0.951	0.393	-1.232	0.312	-0.254	0.807	-1.639	-1.565	0.416	-1.895	-2.553	-2.768	0.949	-1.276	-0.522	0.674
GSM773607	0.117	2.614	-1.915	-0.211	1.412	1.702	0.113	1.514	1.104	-0.54	0.467	-1.006	0.691	-2.299	-1.731	0.858	0.489	-0.629	-1.697	0.005	0.049	-1.805	-1.113
GSM773608	-0.187	1.073	1.143	0.314	1.262	-0.165	1.356	-1.471	-0.562	-1.057	-0.024	-0.101	-0.76	-0.618	-0.916	-0.142	-0.897	-1.348	-1.572	-0.635	-1.585	0.347	0.413
GSM773609	-0.123	1.092	0.526	-0.347	1.529	2.051	0.761	1.444	-0.718	-0.653	0.445	0.6	1.216	-1.455	-1.89	1.449	-1.081	-0.491	-1.281	-0.123	-1.033	-0.769	1.948
GSM773611	-0.506	1.257	-1.631	1.643	1.755	0.886	-0.229	-0.167	0.866	0.64	1	0.612	-0.118	-1.049	-0.939	0.896	0.135	1.193	-0.036	-1.698	0.324	-0.014	-2.896
GSM773612	0.174	0.03	0.675	1.782	1.64	2.64	1.904	-0.255	0.746	-1.666	-0.799	-0.475	1.758	-0.582	-1.388	2.756	0.461	-0.717	-1.177	-1.084	-0.506	0.83	0.829
GSM773614	0.265	2.099	-0.285	-0.633	1.293	1.419	0.719	1.482	0.982	-1.53	-0.998	-0.698	0.664	-0.911	-1.305	0.662	-0.3	-0.116	-1.174	-0.667	-1.162	0.44	0.525
GSM773615	0.014	1.494	-0.495	1.032	0.398	2.089	1.266	0.609	0.195	0.105	0.99	0.736	1.171	-2.112	-1.585	0.586	-1.979	-2.137	-0.741	1.165	0.763	-2.331	-0.071
GSM773618	-0.391	1.917	0.853	-1.165	1.025	0.07	0.748	0.866	0.867	0.856	-1.19	1.216	-1.173	-2.697	-2.498	0.187	-0.12	-1.362	-1.911	-0.158	-1.475	-0.621	2.237
GSM773619	0.114	2.497	1.299	-0.764	1.658	1.498	-0.199	1.409	-0.241	1.008	-0.668	-1.172	0.236	-0.921	-1.863	1.156	-1.352	0.082	-0.908	0.1	-0.834	-0.509	0.679
GSM773620	-0.189	0.908	1.471	-0.754	1.475	1.292	-0.035	1.125	0.507	1.448	0.075	2.214	0.752	-1.23	-1.736	0.263	-1.628	-1.889	-2.26	-0.53	-1.105	-0.899	-1.733
GSM773622	-0.03	0.845	0.252	0.864	0.921	0.989	-0.792	0.455	1.011	-0.132	0.746	-0.212	0.047	-1.575	-1.245	0.607	-1.528	-1.724	-2.374	1.038	-1.294	-0.297	-1.238
GSM773623	-0.12	2.229	0.588	-0.021	1.386	1.193	-0.228	1.2	-0.648	1.224	-0.847	0.687	-0.091	-1.814	-1.869	0.805	1.198	-0.211	-1.092	-0.16	-1.403	0.296	0.451
GSM773624	-0.162	0.182	1.493	0.396	1.486	0.832	-0.018	1.349	0.284	0.027	-1.395	1.026	0.39	-2.8	-2.639	-0.651	-0.792	-0.309	-1.756	-1.242	-0.88	-0.073	1.568
GSM773625	0.574	1.613	-0.468	0.148	1.254	2.287	1.178	-1.581	-0.766	-0.031	0.743	0.446	1.437	0.375	-1.502	1.604	-1.339	-1.435	-1.536	-0.847	-1.132	-0.307	1.177
GSM773629	0.059	-0.924	-1.644	1.062	1.873	1.678	0.763	-1.125	1.205	1.189	-0.808	-1.009	0.858	-0.245	-1.459	1.468	-0.547	0.637	-0.39	-0.932	0.048	0.163	0.46
GSM773631	-0.213	0.766	0.253	-0.679	1.431	0.957	0.765	1.421	0.238	0.042	-1.003	0.751	-0.893	-1.976	-1.821	0.968	0.163	-0.454	-1.421	-1.626	-2.307	-1.532	0.338
GSM773632	-0.34	1.297	1.086	-0.836	1.624	0.859	-0.449	1.098	0.343	1.077	-0.008	0.412	0.311	-2.008	-1.498	-0.366	-0.898	-0.107	-1.666	-0.893	-1.767	0.006	0.626
GSM773634	-0.057	3.485	1.546	1.174	1.776	1.879	1.121	-1.481	-0.92	-1.193	0.015	-1.086	1.359	-1.959	-2.499	1.279	-0.239	-0.601	-0.681	-0.426	-0.945	-0.129	-0.751
GSM773635	0.059	2.298	-1.486	1.863	2.052	2.277	1.827	-0.664	-1.373	-1.126	-0.07	-0.957	1.971	-1.335	-1.969	1.65	-0.047	0.788	0.061	-0.828	-0.081	0.024	0.498
GSM773637	-0.608	2.169	0.72	-0.638	1.792	1.32	0.122	1.172	-1.219	-0.691	0.44	0.71	0.651	-2.728	-2.676	0.717	-1.394	0.575	-0.418	0.066	-1.01	0.617	0.219
GSM773638	-0.396	0.226	0.794	0.154	0.754	-0.03	0.752	-1.451	1.088	-1.444	-0.197	0.969	-1.354	-0.663	-1.445	0.859	-1.076	-1.486	-1.472	-1.071	-1.348	-1.338	-0.473
GSM773642	-0.563	0.497	0.542	-0.96	-0.32	-0.131	0.651	0.529	-1.005	0.952	0.871	0.695	0.689	-0.667	-1.205	0.039	-1.412	-0.873	0.802	0.879	-1.084	1.737	-0.455
GSM773648	-0.038	1.948	-0.171	-1.379	0.771	2.017	1.106	0.485	0.992	-1.522	-0.148	0.525	1.257	-0.936	-1.851	0.415	-0.643	-1.557	-1.428	-0.986	-0.596	0.359	0.758
GSM773652	-0.168	1.827	1.583	0.258	1.767	2.384	2.23	1.748	1.006	1.008	-0.506	0.243	2.305	-1.955	-3.051	0.466	0.23	-0.741	-1.226	-1.048	-1.026	0.379	-1.027
GSM773653	-0.314	2.475	0.487	0.039	1.61	1.375	0.793	1.476	0.79	0.615	-1.233	-1.594	0.922	-2.539	-2.602	0.714	0.789	0.184	-0.966	-0.806	-1.041	-0.381	0.403
GSM773654	0.043	-0.358	0.951	0.382	0.933	2.63	2.533	1.485	1.083	1.043	-0.84	0.329	2.377	1.067	-0.818	0.742	-0.631	-0.447	-0.85	-0.914	-0.646	-1.746	2.285
GSM773657	-0.181	1.824	1.564	0.891	1.753	1.924	1.164	-1.088	-1.365	-0.443	0.437	0.458	1.379	-1.541	-1.702	1.154	1.336	-0.343	-1.169	-0.648	-0.839	-1.168	2.39
GSM773662	0.009	-0.446	0.241	1.508	2.004	2.116	0.534	-0.981	0.163	-0.725	-0.121	0.138	0.875	-0.674	-1.489	2.166	0.007	-0.242	-0.509	-0.816	0.312	-0.239	0.773
GSM773663	-0.078	0.707	0.746	-0.925	1.038	0.837	0.162	0.91	0.462	-0.058	-0.128	0.58	0.286	-1.811	-2.035	-0.031	-0.526	-0.135	-0.444	0.064	-0.654	0.27	2.016
GSM773664	-0.429	2.222	-0.285	1.32	1.172	0.297	-1.037	0.404	0.919	-0.003	1.272	1.153	-0.61	-2.347	-2.418	-0.786	-0.851	0.039	-1.379	-0.87	-0.756	-0.311	1.086
GSM773667	0.513	0.101	-1.947	0.81	1.382	2.428	2.179	-1.492	-1.205	-1.124	-0.824	-0.712	1.982	-2.475	-2.667	0.361	-0.593	-1.103	-1.302	-0.368	-0.435	-1.899	0.989
GSM773668	-0.275	-0.195	0.604	-0.998	0.974	0.398	-0.797	0.374	-1.49	0.857	-0.637	0.192	-0.161	-2.603	-2.761	0.004	-0.009	-0.715	-1.649	-0.932	-2.141	-0.539	0.104
GSM773670	0.069	1.605	1.614	-0.707	0.842	0.091	-1.019	1.39	-0.268	1.109	-1.364	-0.668	-0.859	-0.267	-1.384	0.009	1.36	-0.298	-1.154	-1.684	-1.432	-0.08	1.299
GSM773671	0.02	1.642	0.808	0.206	1.672	1.34	0.241	1.217	-0.908	0.756	1.174	-0.214	0.25	-1.011	-1.031	0.953	1.098	0.987	0.1	-1.362	-0.187	-0.255	0.694
GSM773680	-0.007	1.756	0.964	1.239	1.887	1.963	0.621	-1.031	0.254	1.042	-1.313	-1.392	0.632	-2.098	-2.62	1.987	-0.168	-0.59	-0.272	-1.16	-0.175	0.396	1.763
GSM773681	0.07	0.929	0.859	1.218	1.383	2.206	1.199	-0.621	-1.299	-0.855	0.255	0.223	1.507	0.047	-1.551	1.2	-0.493	-0.762	-1.59	-1.081	-0.026	0.113	-0.835
GSM773682	-0.349	0.524	0.815	-0.64	1.305	0.902	-0.219	1.431	1.122	-1.556	-0.727	-1.263	-0.086	-1.461	-1.54	0.685	0.185	-1.677	-1.756	-1.23	-1.843	-0.957	-0.076
GSM773684	-0.808	1.165	0.512	0.64	1.526	1.204	0.836	-1.598	-0.014	-1.108	-0.478	-1.071	0.961	-2.138	-1.633	-0.013	-0.988	-0.857	-1.549	-0.832	-0.63	0.228	0.12
GSM773685	0.068	0.62	0.047	-1.053	0.611	1.613	0.588	0.644	1.129	-0.287	0.366	-0.015	0.838	-1.951	-2.52	0.635	-0.134	-1.135	-1.824	-0.502	-0.795	-1.199	2.011
GSM773686	-0.683	0.994	0.481	-0.843	1.272	0.972	-0.69	1.287	-1.315	1.294	-0.523	0.132	-0.077	-1.502	-1.545	0.793	-1.608	0.252	-0.752	-1.118	-0.77	-0.48	-1.399
GSM773687	-0.441	1.462	0.584	1.426	1.034	0.754	-0.85	0.679	0.797	-0.198	0.282	0.404	-0.222	-1.363	-1.699	0.573	-1.684	-1.094	-1.791	-0.463	-1.226	0.51	2.059
GSM773688	-0.053	2.088	0.597	1.21	2.017	1.561	0.459	-1.282	1.279	-1.114	-0.087	0.775	0.964	-1.473	-1.854	1.081	-0.455	-0.098	0.019	-0.831	-0.885	0.876	1.786
GSM773689	0.117	1.662	0.915	-0.486	0.693	0.913	-0.123	1.217	-0.678	1.347	-1.089	0.419	0.056	-1.977	-2.086	1.399	0.723	-0.283	-0.818	-0.696	-1.176	-0.171	-0.419
GSM1672281	0.806	3.096	-1.797	2.503	0.718	2.162	0.935	1.685	0.179	-0.145	-0.469	-0.251	0.618	0.175	-0.199	2.385	0.141	-2.957	-2.415	-1.444	1.587	2.076	1.098
GSM1672282	0.201	0.497	-1.443	0.446	0.143	-1.527	-1.424	-0.244	-1.105	1.283	1.315	0.952	-1.198	-1.204	-0.895	-0.543	-1.385	-2.222	-3.284	-1.033	0.928	0.436	1.385
GSM1672283	0.32	2.738	-0.116	1.505	1.399	1.42	-0.783	0.256	-0.113	1.274	-0.59	0.875	-0.235	-0.505	-1.486	1.826	-1.484	-1.548	-2.698	-1.288	0.501	1.072	0.655
GSM1672284	0.854	1.331	1.134	2.423	1.138	0.188	-0.376	1.392	1.225	0.762	-1.268	0.001	-0.217	-0.571	-1.661	0.999	-0.175	-2.763	-2.376	-0.929	0.429	1.961	1.406
GSM1672285	0.417	2.399	0.233	1.167	1.186	0.932	1.045	0.59	-0.503	-1.197	-0.55	1.245	1.069	-0.162	-0.865	-0.924	-0.259	-1.771	-2.935	-0.251	2.331	-0.016	2.187
GSM1672286	0.121	0.217	-0.454	-0.641	-0.5	0.812	1.039	-1.041	-2.195	-0.125	0.009	-1.887	1.804	-0.643	-0.822	0.626	0.421	-2.615	-3.09	-2.009	-0.286	1.182	2.794
GSM1672287	0.486	1.129	-1.368	1.976	1.841	-1.402	0.742	1.426	-0.889	-0.51	0.771	-1.333	-1.017	0.143	-1.006	-0.281	-0.228	-0.486	0.811	-2.102	0.53	1.014	0.628
GSM1672288	0.562	-0.006	-0.507	2.768	1.539	0.538	-0.126	1.392	0.998	-0.78	0.127	1.234	0.346	-0.455	-0.286	0.937	0.123	-1.973	-3.024	-0.648	1.032	-0.438	-0.03
GSM1672289	1.416	1.731	-1.442	-0.646	-1.067	-1.072	0.854	-0.439	1.678	-0.436	-0.796	0.604	1.105	-0.893	-1.621	0.085	0.957	-0.265	-1.914	-0.287	0.369	0.189	2.024
GSM1672290	0.646	0.377	-2.346	1.547	0.803	-0.135	0.177	0.368	-0.552	0.123	-0.013	0.768	0.054	-0.297	-1.174	0.327	-0.52	-2.565	-2.938	-1.032	0.662	-0.928	1.619
GSM1672291	1.029	2.99	-0.462	1.415	1.328	1.719	1.29	-0.736	0.44	-0.068	1.216	-0.903	1.454	0.786	1.713	-0.682	-0.82	-0.493	-1.801	-1.725	1.25	0.93	0.203
GSM1672292	1.306	1.137	-0.536	1.645	0.112	1.332	1.757	0.87	-0.18	1.257	0.631	-0.792	1.123	-0.508	-1.025	0.086	-0.245	-2.815	-2.779	-1.393	1.331	0.967	-0.107
GSM1672293	0.469	0.138	-1.102	0.002	1.156	-1.355	-0.021	0.587	-0.027	-0.062	-1.301	2.556	-0.36	-0.625	0.121	1.03	-0.262	-1.528	-2.175	-1.602	0.168	-1.273	0.233
GSM1672294	1.191	3.591	-0.17	1.63	0.126	3.242	2.314	0.121	-0.213	-0.655	-0.554	2.734	1.805	-0.078	-0.374	1.659	-0.244	-1.928	-2.43	-1.179	1.678	0.252	1.314
GSM1672295	0.217	0.102	-2.555	-1.012	0.567	0.029	-1.161	0.342	-0.498	-0.571	-0.775	1.388	-1.243	-1.029	-0.717	0.455	-1.251	-3.188	-3.887	-2.187	0.301	-0.261	1.819
GSM1672298	0.813	0.711	-1.083	1.616	1.953	1.492	-0.257	-0.74	-0.389	-0.547	0.947	-1.153	0.506	-0.242	-0.977	1.499	-0.857	-1.232	-2.4	-1.521	0.801	2.023	-0.193
GSM1672300	0.611	0.893	-0.764	-0.063	-0.913	-0.003	0.093	0.103	-1.908	-1.341	-0.184	-2.166	1.182	-1.098	-1.047	-0.701	-2.068	-1.304	-2.402	-2.558	-0.593	-0.083	0.223
GSM1672301	0.163	0.407	-1.33	0.572	0.411	-1.114	-1.385	-0.717	0.876	-0.94	-1.014	-1.071	-1.227	-1.392	-1.042	-0.251	1.528	-1.182	-2.476	-1.251	0.281	0.016	1.522
GSM1672312	0.438	1.839	-1.821	1.363	0.791	1.604	0.15	-0.039	-0.465	-0.47	0.313	3.071	0.491	-0.075	0.201	1.567	-1.248	-2.263	-2.694	-0.153	1.088	1.046	2.87
GSM1672316	0.102	1.366	-1.275	-1.26	-0.857	-1.216	0.219	-1.14	-1.08	-0.916	-0.752	-0.605	0.801	-1.272	-0.928	0.617	0.294	-2.025	-2.619	-0.684	1.055	-1.076	1.5
GSM1672319	1.032	1.669	-0.439	2.279	1.423	2.788	1.579	1.007	0.105	-0.086	0.624	1.317	1.622	0.686	-0.337	1.636	-0.366	0.121	-0.842	-1.191	0.704	1.898	1.989
GSM1672320	0.327	0.286	-1.365	-0.81	0.974	-0.459	1.025	1.18	1.052	-0.475	1.131	-0.372	-0.498	-0.321	0.163	-0.622	-0.649	-0.332	-1.401	-1.701	0.574	1.061	-0.515
GSM1672321	0.498	-0.314	-0.814	1.926	1.923	0.674	-0.245	-0.732	-0.538	-0.07	1.121	-0.648	0.798	-0.032	-0.534	0.38	-0.572	-1.141	-2.121	-1.424	0.586	-0.857	1.534
GSM1672322	0.504	1.282	-0.463	2.396	1.66	0.561	-0.624	1.086	-1.069	-0.014	0.713	0.949	0.078	-0.465	-0.359	1.571	-0.492	-0.837	-2.118	-2.092	0.842	-0.68	1.72
GSM1672325	0.83	0.608	-0.797	-0.537	0.349	-0.009	1.114	-0.64	-1.125	-0.062	0.423	-0.209	-1.101	-0.438	-0.326	0.651	-0.026	-0.808	-1.786	-1.154	1.548	-0.561	2.03
GSM1672326	0.959	-0.033	-1.481	1.08	0.815	0.673	0.878	-0.689	-0.529	-0.255	0.269	-0.146	0.934	0.314	-0.906	-0.148	-1.254	-2.442	-3.191	-1.514	1.129	0.14	2.519
GSM1672327	0.834	1.243	-0.755	-0.269	-0.696	0.582	-0.163	-1.301	0.094	0.398	-0.315	1.43	-0.653	0.456	0.496	1.814	-1.359	-0.476	-1.602	0.099	0.538	1.648	0.316
GSM1672328	0.853	-1.099	-1.795	0.072	-1.249	-1.427	-0.322	0.278	-1.153	-0.131	-0.093	1.666	0.454	1.075	-0.98	1.318	-0.396	-1.004	-2.415	0.211	0.592	0.812	0.338
GSM1672330	1.162	2.066	2.447	2.33	1.519	2.597	1.354	0.716	0.015	0.166	0.623	-1.539	1.533	0.006	-0.677	2.26	-0.428	-0.449	-1.466	-2.028	0.878	1.582	-1.232
GSM1672333	-0.233	0.845	-1.417	-0.53	0.719	1.187	0.242	0.914	-0.488	-0.542	0.2	-0.336	-1.362	-0.505	-0.067	0	0.372	-0.041	-1.442	-1.826	0.514	-0.787	-0.146
GSM1672335	0.946	0.815	0.057	0.965	0.534	0.429	0.903	1.182	-1.469	-0.431	-0.444	-1.7	0.598	0.022	-0.82	-1.049	-0.401	-2.733	-3.04	-2.142	1.415	1.112	1.284
GSM1672337	0.896	0.682	0.746	1.29	0.307	1.52	0.361	-0.062	0.154	-0.286	-0.593	0.415	0.159	-0.348	-1.246	1.867	-0.658	-1.582	-2.507	-0.813	1.632	1.389	1.059
GSM1672339	0.74	-0.272	1.565	1.425	0.037	2.383	1.273	0.451	-0.093	-0.219	-0.193	0.366	1.043	0.296	-0.404	1.315	-0.856	-2.251	-2.855	-1.224	2.045	2.309	-1.325
GSM1672343	0.931	1.393	-1.135	1.051	-0.419	1.771	0.652	0.562	-0.083	-0.198	0.158	1.231	0.737	-0.647	-0.488	1.248	-1.023	-0.053	-1.533	0.276	1.103	0.412	0.906
GSM1672344	-0.071	0.01	-1.083	1.113	-0.936	0.481	0.429	0.259	0.162	1.38	1.251	-0.443	0.833	-1.092	-0.394	-0.759	0.708	-0.945	-2.537	-1.01	-0.163	0.667	1
GSM1672347	0.492	-0.374	-1.085	0.752	-0.101	1.953	1.38	-1.462	-0.685	0.05	0.054	3.067	1.159	0.264	-0.118	0.623	-0.9	-3.452	-3.62	-1.961	0.49	-1.736	-0.31
GSM1672349	0.897	-0.058	-0.867	-0.27	-1.606	0.038	0.176	-1.157	0.289	-0.135	-0.709	0.405	0.103	-0.709	-0.176	-0.966	-1.355	-2.653	-3.225	-1.343	0.562	0.092	-1.968
GSM1672351	0.733	0.158	0.061	2.592	2.183	0.984	0	1.368	-0.072	-0.22	1.057	0.664	0.733	0.671	-0.113	-0.364	-0.285	0.412	-0.139	-1.015	0.97	-0.271	0.3
GSM1672352	0.417	0.975	-0.967	0.14	-0.196	-0.227	-0.156	-1.154	0.393	-1.077	-1.205	-0.336	-0.24	-0.741	-0.216	-1.149	1.118	-1.033	-2.35	-1.778	1.323	0.881	2.005
GSM1672354	-0.205	-0.02	-1.009	0.483	1.34	-0.677	-1.338	-0.999	-0.492	0.158	-1.025	-0.479	0.513	-0.32	0.028	1.308	-0.597	0.771	-0.533	-2.123	0.733	-0.799	1.397
GSM1672357	0.368	0.163	-1.031	0.65	-1.263	-0.257	-0.282	-0.41	-0.184	-1.148	-0.376	-0.802	0.042	-0.318	-1.092	0.186	-0.645	-1.668	-2.995	-2.259	-0.28	0.231	0.292
GSM1672358	0.843	0.443	-1.02	1.152	1.511	1.371	1.073	0.359	1.285	0.765	-1.009	-0.313	1.318	-0.535	-0.822	-0.061	-0.32	-1.992	-3.067	-2.181	0.34	2.885	2.577
GSM1672359	0.467	1.04	-1.716	-0.933	0.226	-1.154	1.097	0.904	-0.601	-1.484	-0.579	0.647	-0.942	-1.637	-1.206	-1.363	0.109	-0.998	-2.579	-1.488	0.454	0.803	0.743
GSM1672360	0.701	2.361	-2.556	-0.166	-0.938	-0.216	-0.73	-0.246	-2.065	1.326	0.869	0.022	0.015	-0.277	-0.542	-0.097	-0.803	-2.979	-3.315	-1.39	0.431	-1.513	1.262
GSM1672361	0.404	0.452	-2.168	0.869	1.819	0.93	-0.973	-0.783	-0.412	-0.102	1.157	-0.079	0.066	-1.186	-1.316	1.209	0.678	-0.205	-1.871	-2.358	0.944	0.227	-0.836
GSM1672363	0.377	-0.04	-0.822	-0.768	-0.523	-0.91	0.674	1.196	-0.779	-0.112	-0.441	0.182	0.929	-1.902	-0.894	0.795	0.666	-1.79	-2.617	-1.375	1.683	0.621	-0.606
GSM1672365	0.514	0.765	-1.018	-0.308	-0.619	0.49	-1.105	0.823	0.662	-2.197	0.735	-0.076	-0.296	-0.597	0.01	1.157	-1.439	-2.592	-2.737	-1.572	-0.041	-0.974	1.546
GSM1672366	0.016	0.937	-0.676	0.596	-1.315	-1.374	-1.426	-1.23	-0.821	-0.487	-0.33	0.686	-1.163	-1.378	-1.229	1.003	-1.526	-1.486	-2.458	-1.463	0.984	0.214	0.131
GSM1672369	0.696	2.334	-0.543	-0.352	-0.563	0.287	-0.387	-0.951	-1.025	0.055	-0.054	0.565	-0.196	-1.032	-1.201	0.678	0.368	-0.869	-2.27	-1.277	0.094	-0.286	0.197
GSM1672371	0.168	-0.425	-1.773	-0.823	-0.484	-1.318	-1.135	0.849	-1.263	0.068	-0.025	-0.479	-0.65	-0.399	-0.935	-0.404	-0.313	-1.969	-3.385	-1.89	0.404	-1.033	-1.065
GSM1672372	1.047	1.884	0.62	1.598	1.023	1.502	0.521	-0.208	-0.164	-0.222	0.08	-1.472	0.412	-1.017	-1.307	1.729	-0.625	-0.293	-1.555	-1.702	1.446	0.761	0.14
GSM1672373	0.406	1.46	0.373	2.022	1.274	-0.932	-0.479	0.183	-0.774	-1.174	-0.353	1.044	-0.111	-1.19	-0.412	0.11	0.084	-0.685	-1.741	-1.316	0.539	0.912	0.783
GSM1672374	0.886	1.53	-0.95	-0.413	-1.356	0.636	0.79	1.125	0.383	0.109	-0.393	0.163	0.202	0.449	0.473	0.946	1.282	-3.467	-3.229	-1.601	1.214	0.53	0.437
GSM1672379	0.655	0.89	-2.066	0.771	0.63	1.558	0.279	-0.688	-0.365	-0.165	0.01	1.541	0.474	-0.924	-0.92	1.698	1.141	-1.547	-2.222	-1.589	0.981	1.183	0.055
GSM1672381	-0.074	0.011	-1.298	1.043	-0.872	1.041	0.763	-1.075	-0.605	-0.547	-0.398	2.474	-1.281	-0.664	-0.221	-0.29	-1.103	-3.298	-3.022	-0.781	0.56	-2.899	2.388
GSM1672382	0.055	-0.046	-0.926	-0.924	0.478	0.863	-0.441	0.63	0.063	1.279	-1.195	-0.674	0.022	-1.066	-1.086	-0.841	0.782	1.153	-0.315	-1.755	-0.145	-0.212	1.312
GSM1672384	-0.242	-0.038	-0.295	0.998	1.154	0.204	-0.387	-0.074	-1.854	-0.27	0.632	-0.046	0.374	-0.906	-1.347	0.097	0.682	-0.976	-2.515	-1.598	1.551	-0.851	-0.313
GSM1672386	0.929	-0.309	-1.727	-1.383	-1.041	0.472	0.359	-1.062	-0.992	-0.237	0.732	2.02	0.681	0.799	-1.244	-0.26	0.921	-2.245	-2.926	-1.514	0.203	-0.36	1.818
GSM1672387	0.262	0.064	-1.875	1.11	0.472	-1.357	0.356	0.887	-1.884	-0.652	0.395	-0.941	-1.04	-0.664	-1.16	-0.862	-1.21	-1.46	-3.037	-1.876	0.813	-2.168	1.037
GSM1672394	0.212	-0.578	-1.628	-1.336	-0.302	0.553	0.138	1.023	-0.534	-0.922	-0.856	-0.36	0.483	-0.997	-0.851	-1.062	0.078	1.138	-0.364	-1.763	1.45	1.381	-0.131
GSM1672396	0.68	0.425	-0.478	1.568	0.71	0.813	0.399	-0.113	1.685	0.043	-0.149	-0.602	0.418	-0.605	-0.596	0.838	-0.945	-1.427	-2.273	-1.793	1.887	0.27	2.146
GSM1672398	-0.208	-0.321	-1.405	-1.783	0.702	-1.851	-1.452	-0.42	-1.913	-1.806	-0.425	-2.393	-0.82	-1.994	-1.293	-0.855	-1.307	-2.772	-3.901	-1.798	-1.065	-0.691	0.69
GSM1672400	0.636	1.512	-0.015	2.29	2.06	2.578	1.986	-0.003	-1.36	-0.671	0.498	0.378	2.165	-0.575	-1.246	0.627	-0.201	-0.773	-1.131	-1.468	0.8	1.001	1.25
GSM1672403	1.501	1.967	0.11	1.745	0.271	0.048	0.644	0.739	-0.508	-0.145	-0.193	0.522	0.363	1.32	-0.104	0.497	-0.196	-1.908	-2.064	-1.047	1.304	1.552	1.112
GSM1672405	0.583	-0.046	-1.279	0.09	1.68	-0.134	-0.408	0.949	-1.201	-0.494	0.479	0.519	0.314	-1.273	-1.13	-0.484	-1.194	-1.379	-2.542	-1.017	1.239	0.847	0.962
GSM1672406	0.532	0.559	-2.194	2.916	1.575	0.369	0.207	1.602	0.066	-0.589	0.095	0.375	0.583	-1.495	-0.401	0.579	-0.021	-0.818	-2.081	-0.892	0.968	1.921	0.525
GSM1672407	0.559	1.604	-1.526	0.806	1.224	1.176	-0.57	0.907	-0.018	-0.914	-0.28	3.583	-0.089	-0.415	-0.213	1.755	-1.172	-1.99	-3.042	0.332	0.853	-0.44	1.791
GSM1672409	0.209	0.432	-1.799	0.899	0.205	-0.296	1.041	-0.265	1.733	0.298	0.722	0.218	-0.567	-1.092	-1.196	0.083	-2.211	0.239	-1.509	-1.026	0.556	1.212	-1.348
GSM1672415	1.163	2.573	1.301	1.756	0.509	1.532	2.056	0.874	-1.622	0.717	-0.231	0.661	1.426	-0.044	-0.91	-0.356	-0.394	-2.15	-1.939	-1.272	0.694	0.117	1.033
GSM1672420	1.034	1.213	-0.967	0.513	-0.648	1.061	1.119	-0.38	-1.028	-0.034	0.607	0.336	0.823	0.486	-1.249	-0.327	-1.193	-2.036	-2.236	-2.024	0.716	2.427	0.802
GSM1672423	1.338	-0.407	0.002	1.755	0.685	0.378	0.777	0.044	-0.215	-0.435	-0.889	1.214	0.403	-0.65	-1.262	-0.39	0.079	-1.332	-2.651	-2.134	1.155	0.509	2.921
GSM1672424	0.884	-0.281	0.04	1.568	0.769	1.847	0.417	-0.572	-0.644	-0.17	0.007	0.119	0.394	-1.322	-0.373	1.663	-0.49	-0.815	-1.322	-1.879	1.435	0.725	1.194
GSM1672425	0.635	2.322	-1.883	-0.143	1.256	-1.043	-1.332	0.299	-1.459	-1.038	0.24	-1.141	-0.287	-0.924	-1.027	-1.113	1.274	0.25	-1.322	-0.692	1.199	1.466	1.719
GSM1672427	0.716	1.948	-0.762	1.968	1.822	1.056	-0.98	0.309	-0.248	-0.13	0.941	-0.49	-0.103	-0.813	-0.257	1.41	-0.921	-0.127	-0.736	-1.003	1.008	0.447	-1.637
GSM1672428	0.256	0.258	-2.387	-0.504	0.269	0.475	0.03	0.121	-1.735	-0.326	0.483	0.966	1.105	-1.357	-1.033	-0.558	-0.513	-2.692	-3.738	-2.025	1.317	-1.769	-1.23
GSM1672429	0.642	1.54	-2.16	0.48	0.088	-1.401	1.107	-1.062	-1.305	0.271	-0.181	1.259	0.982	-1.169	-1.291	0.432	-0.198	-1.048	-2.556	-1.631	0.768	0.268	-0.97
GSM1672430	0.911	-0.617	-1.494	1.131	1.34	0.231	0.341	-0.589	-1.783	-1.194	-0.32	0.642	0.497	-0.351	-1.099	-1.141	1.265	-2.434	-2.934	-2.193	1.167	0.903	-1.652
GSM1672431	0.865	0.88	-0.715	-0.572	1.306	1.222	0.717	0.085	-1.396	-0.438	-1.045	-0.696	0.586	-0.602	-0.681	0.153	-0.748	-3.053	-3.552	-1.135	0.196	1.189	-0.611
GSM1672441	0.976	-0.486	-1.161	-0.998	-0.07	-0.438	-0.892	0.251	-1.577	-1.065	-0.721	0.161	-0.652	-1.151	0.639	0.265	0.544	-1.966	-2.688	-1.806	0.451	-1.285	-1.086
GSM1672443	0.125	1.319	-0.953	-0.937	-0.303	-1.406	0.836	0.23	-0.963	-0.109	-0.289	-0.365	1.059	-1.213	-1.128	0.457	0.776	-1.473	-1.738	-1.822	-0.329	-0.567	1.723
GSM1672445	1.132	-1.39	-0.997	0.199	-1.593	-0.61	0.561	-0.677	-1.295	1.251	1.065	-0.224	0.526	-0.625	-0.77	-1.122	0.331	-1.927	-2.206	-2.099	0.295	0.905	1.403
GSM1672446	0.015	-0.21	-0.46	0.514	0.266	-0.446	0.924	-1.166	-1.036	-0.82	-0.948	0.781	0.833	-0.599	-0.575	0.117	-0.627	-0.876	-2.136	-2.225	1.375	0.394	-0.035
GSM1672448	0.788	0.359	-1.822	-0.942	0.427	0.173	-1.188	-0.005	-1.646	1.35	-1.251	-0.472	-1.028	-2.287	-1.285	-0.141	-0.474	-0.461	-1.954	-2.307	1.215	-0.591	0.477
GSM1672451	0.617	-0.337	-1.723	-0.217	-0.181	-0.302	1.09	-0.891	-0.061	1.156	1.06	1.057	1.202	-1.251	-1.008	1.062	-1.49	0.505	-0.587	-1.387	1.023	0.464	0.411
GSM1672458	1.14	1.476	-0.058	1.346	1.37	1.376	0.588	-0.878	-0.419	-0.091	0.252	1.431	0.652	-0.659	-0.855	1.674	-1.099	-2.049	-2.377	-2.3	0.781	1.426	0.199
GSM1672459	0.17	-0.62	-0.79	0.534	-1.146	0.225	0.494	0.458	-1.845	-1.174	-1.044	-0.129	0.853	-0.921	-0.847	0.813	-0.495	-0.769	-1.752	-1.937	0.048	1.03	1.814
GSM1672460	0.332	0.653	-1.813	1.05	0.954	-0.093	-0.465	-0.009	-1.693	1.245	-0.107	0.984	1.256	-1.607	-1.152	0.895	-0.829	-1.061	-2.444	-1.549	1.371	0.448	1.201
GSM1672461	0.52	-0.562	-0.546	0.306	0.684	-0.847	-0.455	1.004	-1.705	-0.576	-0.467	-0.945	-0.301	-0.343	-0.072	-1.071	-1.477	-2.251	-2.965	-1.751	1.278	0.554	0.166
GSM1672462	0.51	0.618	0.09	0.406	-1.567	1.06	0.891	0.577	0.359	-1.091	0.489	-0.853	-1.278	-0.911	-0.771	-1.029	-1.902	-2.043	-3.041	-1.628	-0.984	0.501	1.184
GSM1672464	1.225	0.56	-1.29	0.801	1.543	0.491	0.306	-0.731	-1.887	0.857	-0.15	1.069	0.957	-1.356	-0.938	-0.92	-0.726	-1.67	-3.014	-1.975	1.327	-0.359	0.866
GSM1672465	0.851	0.068	-0.985	0.845	1.274	1.629	0.076	1.017	0.095	-0.455	0.454	1.622	0.523	-1.425	-1.358	1.504	1.348	-1.332	-2.293	-1.8	0.714	2.074	1.984
GSM1672466	0.326	0.173	-0.24	1.076	-0.894	-0.332	0.247	0.321	-1.681	0.689	0.675	-1.11	0.128	-1.057	-0.646	-1.246	0.705	-0.617	-1.799	-2.177	0.421	0.565	2.184
GSM1672469	0.649	0.553	-0.326	2.142	1.4	-0.791	-1.079	1.013	-0.2	-1.264	-0.448	-0.553	-0.581	-1.417	-1.351	0.465	-0.248	0.913	-0.722	-1.269	1.174	1.039	-1.285
GSM1672470	0.874	1.631	-0.32	2.639	2.153	1.792	0.334	0.768	-0.208	0.17	1.295	3.072	0.948	-0.06	-0.382	1.977	-0.115	-1.553	-1.943	-0.889	0.504	1.15	-0.752
GSM1672471	0.832	0.684	-0.989	0.221	0.879	0.364	-0.744	1.193	-1.083	-0.542	-0.212	1.302	-0.447	-0.883	-0.561	0.996	0.918	-2.205	-2.544	-1.093	1.795	-1.061	-2.356
GSM1672472	0.601	-0.176	-0.752	-0.895	1.16	-1.125	0.142	-0.539	-0.078	-0.845	0.925	-0.334	-0.383	-0.955	-0.67	1.108	1.037	-2.35	-2.856	-1.537	-0.227	-0.392	-1.913
GSM1672474	0.876	0.377	-2.616	0.152	0.164	1.028	0.516	-0.706	-1.96	-1.184	0.41	1.284	-0.634	-1.374	-0.351	0.195	-1.206	-2.038	-2.826	-2.184	1.555	-0.149	-1.186
GSM1672476	0.826	0.541	0.152	1.189	0.94	-0.504	-0.77	-0.584	1.046	-0.845	-0.62	-0.224	-0.578	-1.462	-1.263	0.299	-0.739	-0.565	-1.656	-2.087	1.014	0.466	0.905
GSM1672478	0.93	0.124	-0.908	0.279	-1.405	1.222	0.667	-1.486	-1.591	-0.698	-0.877	-0.779	0.25	-0.269	0.104	-0.283	-0.696	-2.437	-2.66	-2.014	1.605	0.951	0.901
GSM1672480	1.263	0.142	-0.695	1.849	0.903	1.076	-0.61	0.292	-1.533	-0.111	0.036	-1.167	-0.353	-0.354	-0.973	-0.742	0.083	-1.991	-3.348	-2.392	0.301	1.318	-0.111
GSM1672481	0.526	1.972	-1.17	0.657	1.099	-0.315	-1.391	-0.582	-1.34	-0.224	0.506	0.36	-0.712	-1.248	-1.106	0.807	-1.124	-0.874	-2.182	-1.116	1.138	0.32	0.811
GSM1672482	0.783	3.546	-0.783	2.397	1.428	1.621	1.304	0.834	0.313	-0.57	-0.111	0.131	1.281	-0.324	0.074	0.263	-0.03	-1.358	-1.853	-1.989	1.569	1.539	0.926
GSM1672484	1.125	0.18	-0.138	1.245	0.971	0.223	0.018	-1.197	-0.693	-0.517	0.972	1	0.615	-1.182	-0.926	-1.018	-0.505	-0.738	-1.853	-1.872	0.91	0.725	2.701
GSM1672485	-0.131	-0.278	-1.217	-0.278	0.078	0.075	0.601	0.962	-1.718	-1.269	-1.451	-0.773	0.739	-1.05	-1.155	0.937	1.742	-1.297	-2.664	-1.709	-0.135	-0.257	1.341
GSM1672488	1.129	-0.428	-2.56	-0.206	0.993	-0.318	-1.553	1.059	-0.889	0.081	0.412	2.116	-0.908	0.45	-1.362	0.92	0.111	-1.618	-2.802	-1.82	0.472	-2.967	1.45
GSM1672489	0.211	-0.332	-1.14	-0.291	1.082	-1.49	0.057	0.363	-0.041	-0.872	-0.765	0.685	-0.616	-0.943	-0.827	0.384	-0.41	-1.258	-2.321	-2.018	0.577	-0.051	0.818
GSM1672490	1.138	0.983	-0.92	1.184	-0.243	1.915	0.343	-0.07	-0.307	-0.591	-0.188	1.824	0.679	0.256	0.571	1.561	-0.657	-2.334	-2.316	-0.913	1.79	-0.312	0.98
GSM1672491	0.341	-0.477	-1.068	-0.369	-1.546	-0.654	-0.255	0.328	-2.033	-0.521	-0.93	0.64	-0.038	-1.733	-1.001	-0.007	-1.46	-2.874	-3.004	-2.084	0.58	-0.144	-0.372
GSM1672495	1.037	2.496	-2.249	1.045	-0.659	0.834	-0.364	0.128	-0.773	0.755	1.176	0.471	-0.06	-0.972	-1.006	0.507	-0.645	-2.438	-3.042	-2.434	0.935	0.04	0.739
GSM1672496	1.055	1.035	-2.016	0.969	-0.679	-0.059	-0.555	0.056	-2.149	1.298	-0.295	0.846	0.37	-0.431	-0.665	-1.369	-1.167	-1.034	-1.834	-2.395	1.329	-1.644	-1.39
GSM1672497	1.072	1.769	1.64	0.752	0.637	1.723	0.914	-0.582	1.561	-0.728	-0.165	1.121	0.897	-0.959	-0.879	1.021	0.808	-1.896	-2.175	-1.836	1.672	0.524	1.483
GSM1672498	0.488	1.75	1.778	0.801	1.821	1.421	1.404	1.075	-1.253	-0.03	0.83	-0.37	1.772	-1.77	-1.021	0.306	-0.739	-1.617	-2.651	-1.07	0.038	0.921	2.284
GSM1672501	-0.519	0.764	-0.548	-0.824	1.507	-1.65	-0.481	0.205	-1.777	-1.074	1.132	1.129	-0.393	-1.341	-1.208	0.108	-1.034	-1.395	-3.322	-2.32	-0.066	-0.215	1.609
GSM1672504	0.534	0.678	-2.144	-1.162	-1.352	-1.396	-1.215	0.183	-0.208	-0.045	-0.46	-0.311	-1.08	-1.099	-0.86	-1.33	1.348	-3.178	-3.768	-2.342	-0.903	0.487	-0.384
GSM1672505	0.721	1.553	-1.986	0.862	1.109	1.985	0.362	-0.372	-0.403	0.204	0.547	1.517	0.735	-1.175	-0.93	1.561	0.991	-1.903	-2.838	-1.341	1.211	0.991	0.278
GSM1672506	1.207	1.568	-0.087	-0.244	-0.583	0.006	-0.64	1.071	-0.068	-0.568	-1.118	-0.558	-0.93	-0.247	-0.174	2.036	0.926	-2.101	-2.255	-1.507	1.963	1.348	1.08
GSM1672507	0.614	0.318	-2.545	1.442	1.203	0.422	0.196	-0.476	0.797	-0.428	0.167	-0.713	0.521	-0.835	-0.542	0.62	-1.197	-1.425	-2.909	-1.735	1.032	-1.213	-0.021
GSM1672508	0.557	0.179	1.357	1.521	1.541	1.264	-0.053	-0.6	-0.604	0.198	-0.876	-0.159	-1.465	-0.555	-0.223	-0.444	0.503	-1.202	0.248	-1.163	1.953	0.056	0.252
GSM1672509	1.221	1.154	-2.203	0.331	-0.351	-0.749	0.495	0.248	0.979	-0.804	0.131	-0.145	-0.818	-0.833	-1.069	-0.288	-1.122	-2.582	-2.782	-1.639	0.918	0.735	-0.5
GSM1672511	0.371	-0.934	-0.826	1.868	1.235	-0.719	1.091	0.385	-0.606	1.34	-1.089	-0.123	-1.088	-2.069	-0.878	1.215	-0.149	0.914	-0.562	-1.235	0.697	-0.345	-0.416
GSM1672513	0.116	-0.058	-1.208	-0.957	1.477	0.641	-0.129	0.176	0.651	1.209	1.1	-1.369	0.07	-0.479	0.61	-0.032	-1.886	-2.183	-2.926	-1.493	0.924	-1.322	1.117
GSM1672514	0.983	0.84	-1.34	0.448	0.842	1.406	-0.286	-1.334	-0.031	-0.191	0.402	-1.498	0.257	-0.28	-0.014	1.346	0.363	-0.724	-1.778	-2.271	0.058	-0.749	1.404
GSM1672516	0.479	0.411	-0.927	0.349	1.016	0.093	-0.749	0.124	-0.549	-1.908	-1.214	1.155	-1.041	-1.063	-1.263	0.327	1.243	-1.191	-1.627	-1.362	-1.088	-0.727	1.491
GSM1672517	0.549	-0.301	-2.066	-0.486	0.253	0.156	0.522	0.847	-0.134	1.359	-1.291	-0.886	0.295	-0.476	-0.502	-0.986	-1.102	-2.54	-3.048	-1.92	0.892	-0.044	-0.364
GSM1672519	0.939	2.662	-2.12	1.419	0.885	0.716	-0.564	-0.05	1.296	-1.01	-0.521	-1.469	-0.31	0.453	0.325	0.194	-0.779	-1.161	-2.211	-1.462	1.825	-0.553	0.016
GSM1672520	0.089	0.314	-0.393	-0.955	0.417	-0.095	0.018	0.292	-1.982	0.761	-0.669	-1.057	1.14	-0.979	-1.015	1.253	1.042	-2.255	-2.918	-1.957	0.484	-1.214	-0.488
GSM1672521	0.83	0.46	-0.631	2.237	1.397	0.146	-1.557	1.336	-1.521	-0.971	-0.374	1.008	-0.771	0.338	0.518	1.052	-0.316	-0.868	-2.049	-0.905	1.894	1.197	0.925
GSM1672522	1.108	1.571	-1.349	1.962	0.679	-0.865	-0.801	1.244	-0.899	-0.131	-0.163	-1.274	-0.686	-0.857	-0.643	-0.158	-0.068	-2.529	-3.572	-1.259	0.749	-0.314	-0.873
GSM1672523	1.332	0.228	-0.489	1.373	0.084	0.9	-1.28	0.504	-0.861	-0.893	-1.384	0.652	-1.297	-0.632	0.01	-0.364	-0.469	0.886	-0.712	-1.506	1.704	1.502	0.497
GSM1672524	0.184	-0.608	-1.878	-0.35	-0.258	1.266	-1.255	0.731	-1.456	-0.059	-0.024	1.646	1.185	-1.35	-1.391	-0.719	-0.914	-2.268	-3.22	0.663	0.788	-0.185	-1.537
GSM1672525	1.089	-0.638	-0.007	2.3	1.252	0.799	-0.312	0.879	-1.187	-1.041	-0.456	0.582	-0.156	-1.217	-0.223	1.596	-0.326	-0.959	-1.338	-1.786	1.001	1.323	0.678
GSM1672526	-0.068	-1.04	-1.943	0.027	1.443	0.34	-0.449	0.322	-1.94	-0.56	0.321	-2.792	1.016	0.915	0.452	1.162	-0.395	0.199	-0.575	-2.101	0.739	1.318	0.815
GSM1672527	-0.417	0.514	-0.778	-0.853	-0.293	0.222	0.1	-0.341	-1.905	-1.103	-0.855	-0.892	0.862	-1.279	-0.713	-1.426	-1.439	-1.476	-2.633	-1.408	0.476	1.36	-0.747
GSM1672528	1.199	0.745	-1.253	1.68	0.745	0.59	0.407	0.532	-1.28	0.046	0.193	-0.898	0.404	0.393	0.961	1.368	-0.808	-2.294	-1.671	-1.112	0.904	0.54	1.104
GSM1672530	0.376	0.283	0.452	-0.282	1.379	0.642	-0.355	1.361	-0.392	-0.101	0.096	-0.584	-0.146	-0.808	0.346	0.302	-1.079	-2.717	-2.559	-1.729	0.782	1.852	2.143
GSM1672531	0.884	1.715	-1.912	2.503	1.574	1.272	0.572	1.134	0.711	0.462	0.818	0.834	0.962	1.128	0.401	0.608	-0.414	0	-0.041	-1.106	1.152	1.844	1.22
GSM1672532	0.694	0.02	0.719	2.317	0.557	-0.799	-0.87	1.741	1.588	-0.491	-0.624	1.038	-0.75	-0.793	-1.118	0.544	0.252	0.26	-1.272	-1.543	0.273	2.935	1.584
GSM1672533	0.195	1.67	-0.697	-0.758	0.564	0.647	-1.089	0.591	-1.124	-0.389	0.683	2.409	-0.205	-0.561	0.45	0.769	-0.192	-2.853	-3.193	-1.515	0.652	-1.422	0.191
GSM1672535	0.974	-0.833	-2.473	1.368	-0.169	-0.424	-1.021	1.086	1.259	-0.381	-0.937	-1.46	-1.185	1.341	1.333	1.436	-0.2	-0.415	-0.935	-2.158	0.639	1.975	0.67
GSM1672536	0.07	-0.42	-1.363	1.774	1.287	-0.07	-0.153	-0.078	-1.256	-0.515	-0.105	0.848	0.173	0.2	0.356	-0.395	-0.754	-1.809	-2.876	-1.709	0.356	0.758	-1.156
GSM1672538	0.335	-0.226	-1.125	1.748	0.585	0.59	-0.132	0.568	-0.061	-0.259	-0.129	0.732	-0.041	-0.995	-0.8	1.455	-0.38	-1.546	-1.921	-1.679	1.233	1.433	-2.312
GSM1672539	0.08	0.431	-1.746	-0.287	-0.511	0.281	-0.445	0.098	-0.15	0.347	-0.59	0.246	-0.429	-0.03	-0.583	1.464	-1.309	-1.788	-3.323	-1.94	0.473	0.922	1.661
GSM1672541	0.766	-0.404	-0.535	1.208	1.342	0.903	-0.113	-0.038	0.583	-0.358	0.607	-1.278	0.705	-1.836	-1.068	1.307	0.594	-2.51	-2.415	-1.511	1.366	1.475	1.37
GSM1672542	0.217	1.597	-1.306	0.996	0.553	-1.218	0.082	0.466	-0.579	-0.47	-0.876	1.748	0.34	-0.589	-0.497	1.447	-0.541	-2.121	-2.198	1.056	1.073	0.132	-0.182
GSM1672547	0.653	1.535	-0.309	1.365	0.987	1.828	1.011	-1.034	-1.423	1.335	-0.67	1.122	1.261	-1.047	-0.489	0.753	-0.521	-2.805	-2.89	-2.347	1.803	0.964	0.443
GSM1672548	0.445	1.246	-0.902	2.179	1.045	0.589	-1.252	1.235	-0.532	-0.735	-0.292	-0.894	-0.854	0.513	1.211	0.298	0.002	-2.958	-2.137	-1.83	1.465	1.385	-0.879
GSM1672552	0.573	0.511	1.842	1.782	0.911	2.153	0.655	0.667	-0.191	-0.276	0.382	1.152	0.924	-0.298	-0.457	1.792	-0.934	-0.257	-1.826	-0.434	0.811	1.27	1.273
GSM1672553	0.48	2.59	-0.803	0.631	1.775	-0.667	-0.422	-0.634	-0.755	1.195	0.465	-0.143	0.48	-1.534	-0.886	0.897	-0.449	0.521	-0.728	-1.618	0.915	0.681	0.796
GSM1672556	0.329	-1.196	-0.016	-0.965	1.455	-0.385	-0.641	0.873	1.478	-0.151	-0.639	0.388	-0.712	-0.541	-1.238	0.37	1.181	-1.641	-1.969	-2.243	0.21	2.053	-0.978
GSM1672557	0.639	0.194	-1.963	0.483	-0.71	-1.303	-0.25	0.574	-1.978	-0.452	-0.744	-0.27	-0.098	-1.187	-0.569	-1.588	-0.507	-2.37	-3.233	-1.855	-1.059	-2.47	-1.175
GSM1672559	0.645	0.3	-1.298	-0.88	1.44	0.05	0.412	0.701	-0.635	0.355	-0.079	-1.688	0.351	-0.78	-0.054	-1.376	1.282	-0.574	-2.012	-1.823	0.905	1.66	0.733
GSM1672560	0.667	0.705	0.306	-0.905	-0.797	-0.107	-0.921	0.672	-0.87	-0.274	-0.461	-0.612	-0.789	0.095	0.589	1.07	0.659	-1.582	-1.766	-2.501	0.92	0.736	-1.654
GSM1672561	0.517	-1.242	-1.536	-0.37	0.064	0.042	-0.334	0.797	1.481	0.389	-0.492	-1.189	-0.575	-0.954	0.601	0.194	0.898	-3.262	-3.124	0.3	1.871	0.754	1.089
GSM1672562	1.544	-0.925	-0.127	1.387	1.855	0.303	-0.013	1.215	-1.663	-0.367	0.964	0.069	0.816	0.045	-0.869	0.527	-1.066	-2.853	-2.593	-2.444	-0.076	1.484	0.136
GSM1672563	0.312	-0.691	-1.288	-0.786	-0.212	-0.32	-1.244	-1.203	-0.833	-0.786	-0.931	-1.426	-1.197	-1.1	-0.926	0.32	-0.365	-2.415	-2.794	-2.447	0.908	1.205	-0.298
GSM1672564	0.711	-1.012	-1.828	2.019	0.449	-0.189	-1.011	1.361	0.246	-0.315	-0.815	1.443	-1.324	1.33	-0.81	2.379	-0.144	-0.178	-1.794	-2.513	1.527	2.45	2.597
GSM1672565	0.31	0.153	-1.24	-1.393	-0.54	-0.877	0.435	-1.004	-0.501	-1.278	-1.185	1.451	0.909	0.109	-0.2	1.035	-0.495	-2.109	-0.179	0.093	0.139	0.346	-0.622
GSM1672567	0.353	0.038	-0.724	-1.104	1.17	-0.263	-0.223	0.148	1.048	1.063	0.633	-0.148	-0.235	-1.848	-1.212	-0.806	-0.892	-2.133	-2.532	-2.291	-0.927	1.114	0.901
GSM1672568	-0.623	0.897	-1.697	-1.058	-0.206	-1.287	0.629	-1.296	-0.944	-0.516	-0.46	1.045	0.975	-0.658	-0.044	-0.096	-0.404	-1.324	-1.069	-1.777	-0.23	0.091	1.697
GSM1672570	0.403	-0.584	-2.412	0.368	-0.461	1.029	0.937	-1.245	-1.425	-0.361	-0.123	-0.799	1.072	-0.873	-1.011	-0.789	-0.954	-1.476	-2.226	-1.777	1.144	1.293	2.37
GSM1672571	-0.204	0.201	-1.965	0.688	1.438	-1.242	0.307	-1.104	1.386	-0.329	0.462	0.729	-1.487	-0.981	-1.115	-0.095	-1.016	0.134	-0.305	-0.723	0.372	-0.653	0.434
GSM1672572	0.886	1.474	-1.57	0.723	1.858	0.666	-1.061	0.89	-1.121	0.27	1.41	1.341	-0.033	-2.02	-1.03	-0.046	0.905	-0.643	-1.422	-1.616	1.182	0.602	1.797
GSM1672574	0.216	0.341	-2.013	0.161	1.399	-1.242	-0.577	-0.096	-0.507	0.124	0.795	-0.874	0.833	0.282	0.595	1.469	-0.166	-0.363	-2.031	-2.075	0.653	1.115	0.258
GSM1672575	0.746	0.194	-1.667	0.771	1.021	-0.875	-0.86	1.252	-1.355	-0.527	0.148	1.052	-0.208	-0.419	-1.376	-0.397	-0.585	-1.761	-2.277	-1.781	0.748	0.087	0.153
GSM1672576	1.023	1.185	-0.381	1.318	0.199	1.102	0.846	-0.029	0.794	-0.541	-0.961	-0.552	0.516	0.407	-0.307	0.771	-0.473	-2.885	-1.806	-1.771	2.142	-1.08	1.867
GSM1672579	-0.22	0.376	-1.054	0.571	0.634	0.339	0.345	0.219	-1.234	0.771	-1.281	1.238	1.042	0.149	-0.557	-0.767	0.808	-1.265	-1.076	-1.319	1.486	-0.632	2.486
GSM1672586	-0.212	-0.96	-2.505	-1.009	0.335	0.842	-0.293	-0.104	1.162	-0.509	0.873	1.031	0.665	-0.42	-0.78	-1.446	0.998	-0.224	-1.13	-2.056	-0.075	0.435	1.702
GSM1672587	-0.241	1.879	-1.542	-0.858	1.376	1.096	1.188	0.256	-1.59	-0.364	1.249	-0.15	-0.521	-0.803	-0.957	-1.001	-1.376	1.143	0.151	-1.219	-0.272	0.566	2.348
GSM1672588	0.228	-0.367	0.393	2.17	1.665	0.987	-0.274	0.928	-1.626	0.255	1.005	-0.067	0.331	0.298	0.195	1.214	-0.628	-1.014	-1.646	-1.498	0.742	1.266	1.76
GSM1672592	0.777	2.555	-0.799	2.409	1.085	1.656	1.811	1.446	-1.44	0.197	0.297	0.981	1.52	0.536	-0.049	-0.659	-0.554	-2.215	-2.815	-1.662	0.712	0.837	1.797
GSM1672593	0.637	0.674	1.5	1.629	0.84	0.05	0.107	0.792	-1.423	-0.005	-0.211	-1.274	0.079	-1.21	1.024	-0.173	-1.067	-3.247	-3.082	-2.077	0.725	-0.077	1.656
GSM1672594	0.865	0.799	-1.457	0.333	1.256	0.505	-1.294	-0.674	-0.306	-0.356	1.196	-0.033	-0.128	0.546	0.297	1.196	0.427	0.981	-1.033	-1.779	-0.339	0.204	1.783
GSM1672595	0.139	-0.05	-2.154	-0.052	0.876	-1.511	0.747	-0.646	-1.701	-0.151	0.199	0.82	-1.344	-1.309	-0.862	-1.252	-0.073	1.048	-0.607	-2.237	0.909	1.195	1.384
GSM1672596	0.228	-0.131	0.012	0.874	-0.47	-1.43	-1.271	0.361	-1.211	-0.372	0.411	1.096	-0.89	0.096	0.111	-0.932	-0.922	-1.346	-1.91	-0.605	0.413	3.157	1.762
GSM1672597	0.118	-0.628	-1.098	1.794	1.096	0.48	-1.44	1.125	-0.063	-0.082	0.037	0.731	-0.913	-0.046	0.24	1.836	-0.378	-2.163	-2.942	-1.759	-0.023	0.338	1.62
GSM1672598	0.887	0.05	-1.18	1.271	-0.244	-0.457	0.205	-0.351	-1.91	0.096	0.79	0.538	0.624	-0.531	0.132	-0.071	0.954	-2.198	-2.64	-2.019	0.323	1.253	0.261
GSM1672600	0.884	0.744	-1.128	1.863	1.379	1.273	-0.168	0.764	-1.218	-0.307	1.108	-0.937	0.567	-0.744	-0.562	0.926	-1.62	0.54	-1.036	-1.743	0.883	-0.471	2.902
GSM1672601	0.296	1.806	1.617	2.142	1.526	1.266	0.075	0.856	-1.227	-0.233	0.409	0.852	0.454	-0.759	-0.825	1.335	-1.112	-2.988	-3.115	-2.491	1.18	1.462	0.667
GSM1672603	1.075	1.633	-0.326	1.982	0.953	2.007	0.911	0.967	-0.571	-1.224	-0.889	0.639	0.849	-0.967	-1.286	0.987	-0.61	-2.075	-1.773	-0.892	1.632	0.956	-1.032
GSM1672604	0.558	0.741	-0.839	-0.284	0.968	-1.012	-1.385	0.509	-1.051	0.001	0.689	0.153	-0.485	-1.241	-0.144	-1.225	0.627	0.023	-1.586	-2.579	0.481	0.536	-0.481
GSM1672605	0.949	-0.317	0.168	1.276	1.639	0.048	-0.092	-0.693	-2.131	-0.707	0.497	-0.994	0.636	-0.43	0.243	-1.069	-1.06	0.195	0.163	-1.895	-0.136	1.564	0.204
GSM1672606	0.119	-0.895	-0.142	0.924	0.533	-0.684	-0.826	-0.587	1.622	0.832	-1.124	0.726	-0.541	-1.261	-0.162	0.576	-1.402	-2.017	-2.287	-2.008	-0.252	1.855	-0.459
GSM1672609	0.373	-0.642	-1.013	0.882	-1.252	1.087	0.085	-0.013	-0.983	-0.89	-0.588	0.509	-0.535	-1.082	-0.893	0.84	-1.313	-2.09	-3.052	-1.749	0.306	-0.429	0.766
GSM1672612	0.725	-0.135	-0.57	0.046	-0.126	0.598	-0.143	-0.554	-0.324	1.195	1.146	1.197	-0.635	-1.119	-1.008	1.314	1.065	-1.039	-2.164	-0.92	0.48	0.301	-0.19
GSM1672613	0.344	0.309	-1.22	0.295	0.852	1.788	0.58	0.178	-0.101	-0.025	-1.394	0.848	0.822	-1.411	-0.89	1.033	-1.269	-3.349	-3.593	-2.009	0.322	-1.668	0.465
GSM1672615	0.726	0.101	-2.22	-1.463	0.959	-1.039	0.652	0.769	0.433	-0.964	-0.276	2.886	0.229	-0.705	-0.348	1.722	-0.697	-2.195	-2.868	-0.064	0.636	-0.459	-1.249
GSM1672616	0.505	-0.274	-1.249	0.82	1.463	-1.22	-0.367	0.203	-1.655	-0.136	-0.184	-1.669	-0.658	-0.666	-0.987	0.276	0.319	-2.116	-3.182	-2.095	1.498	-0.308	1.306
GSM1672617	1.2	1.826	0.56	0.444	-0.168	1.385	2.157	0.339	-1.63	-0.544	-0.185	1.878	1.483	-0.001	-0.239	-0.624	-0.112	-2.005	-2.803	-1.797	-0.12	1.443	2.36
GSM1672618	0.091	-0.406	-1.27	0.92	0.326	1.283	0.491	-0.252	-1.015	0.862	-0.905	0.705	-1.404	-0.529	-0.073	-1.179	-0.688	-1.402	-2.789	-1.968	0.269	0.985	1.492
GSM1672619	0.714	0.653	-1.942	-0.501	-1.116	-1.639	-1.169	0.186	-0.969	-1.299	-0.913	-0.755	-0.379	-0.823	-0.191	0.229	-1.275	-0.508	-2.372	-1.79	-0.329	-0.715	0.174
GSM1672622	0.011	-0.313	-0.988	-2.433	-0.084	0.105	-0.108	-1.179	-0.941	-1.529	-0.785	-0.453	-0.329	-1.029	-0.786	-0.495	-1.093	-1.726	-2.793	-1.593	-0.604	0.581	0.496
GSM1672624	0.391	-0.285	-1.938	0.606	1.622	-0.899	0.898	0.715	-1.54	0.527	-0.295	1.239	-0.557	-1.584	-1.035	-1.602	-0.343	-2.013	-2.965	-2.673	0.315	-1.164	0.545
GSM1672626	0.493	0.902	-2.225	-1.281	0.097	0.939	-0.312	-0.141	0.348	-1.262	0.168	3.546	0.503	-1.379	-1.081	1.275	-0.17	-2.067	-3.202	-0.524	0.174	-0.485	0.057
GSM1672628	0.96	1.822	-1.747	1.319	0.216	0.731	-0.021	0.05	0.244	-0.275	-0.805	2.417	-0.416	-1.209	-0.909	1.604	-0.273	-1.903	-2.785	-1.345	0.397	2.61	2.912
GSM1672629	0.22	-0.261	-1.952	-0.504	-0.621	-0.189	0.87	0.56	-0.039	-0.895	-1.104	-0.162	1.181	-1.348	-0.826	1.002	-0.7	-1.555	-2.015	-2.045	0.879	0.218	-0.872
GSM1672631	0.704	0.42	-1.891	0.473	-0.151	0.08	0.422	1.105	0.606	-0.289	-0.707	0.897	0.036	-0.771	-1.061	-0.118	-0.649	-0.545	-2.126	-2.223	-0.089	-1.283	2.284
GSM1672636	0.269	-0.06	-1.502	-0.439	1.475	-0.392	-1.359	0.022	-1.075	0.747	0.782	3.926	-1.223	1.132	-0.994	0.423	-1.124	-3.034	-3.366	-0.054	0.895	-0.586	-0.161
GSM1672637	-0.148	-0.484	-2.044	-0.212	-1.062	0.262	0.05	-0.129	0.787	-0.996	-0.15	0.103	0.232	-1.391	-1.197	-0.165	-0.561	-1.439	-2.755	-2.316	0.155	1.473	1.676
GSM1672639	0.8	0.332	-1.553	-1.046	-0.236	-0.605	1.363	0.117	0.532	-0.296	1.147	-0.041	-0.745	-0.819	-1	-0.617	0.916	-0.282	-1.601	-0.919	-1.107	1.345	-1.422
GSM1672640	0.904	0.371	0.512	0.876	-0.422	2.173	1.926	-0.802	-0.263	-1.318	1.107	1.969	1.204	-0.51	-1.438	1.373	-0.461	-2.38	-2.945	-1.747	0.799	-0.646	1.129
GSM1672641	-0.122	0.963	-1.989	-0.522	-0.114	0.214	-0.054	0.563	-0.116	-0.302	-0.218	-0.643	0.327	-0.473	-0.662	-0.165	-0.664	-0.942	-2.79	-1.408	0.372	0.684	0.643
GSM1672643	0.88	0.822	-2.359	0.795	-0.301	-1.002	-1.345	-0.014	-1.228	-0.106	1.02	0.563	0.892	-0.092	-0.407	0.84	1.107	-0.342	0.889	-0.826	-0.567	0.148	0.29
GSM1672645	0.446	-0.394	-1.86	0.66	0.009	0.162	0.043	0.544	1.257	-0.352	0.514	0.961	0.053	-1.055	-0.828	-0.282	-0.143	-2.033	-2.767	-1.886	0.663	0.327	0.396
GSM1672650	0.444	-0.715	-1.499	0.195	0.555	0.971	-0.233	0.487	-0.691	-0.744	-1.312	-0.7	0.458	-0.839	-0.882	0.773	-0.87	-1.747	-2.576	-2.074	-0.64	-1.804	0.745
GSM1672651	0.281	-0.758	-1.755	-0.193	-1.324	-0.934	0.29	0.633	-1.678	-1.278	-1.39	0.546	-0.044	-0.749	-1.065	1.001	-0.806	-2.867	-2.912	-1.16	-0.288	0.508	-0.839
GSM1672653	0.26	1.498	-0.792	-0.639	0.261	-1.136	-1.393	0.302	-0.767	-0.474	0.758	1.306	-0.705	-0.788	-0.79	-1.173	0.887	-1.809	-2.812	-1.201	-1.381	1.132	2.699
GSM1672654	0.709	-0.212	-1.857	-0.975	-0.912	-0.595	0.091	0.498	-1.661	-1.269	-1.086	-0.375	-0.046	-1.398	-0.297	-1.164	0.669	-2.595	-3.128	-2.182	0.31	0.875	-1.416
GSM1672655	0.886	0.954	0.061	1.298	0.394	1.475	1.419	-0.527	-0.808	-0.374	-0.24	1.001	1.104	-0.627	-1.049	1.397	-0.497	-1.833	-2.431	-1.523	0.352	2.412	1.317
GSM1672656	0.656	-0.565	-1.854	0.983	-0.199	1.043	0.715	-1.068	-0.467	-0.836	-1.128	-0.93	0.063	-1.006	-1.395	1.484	-0.117	-1.928	-3.011	-1.517	1.453	-0.753	-1.584
GSM1672661	0.957	2.329	-1.124	-0.756	1.437	-0.498	0.368	-0.501	-1.172	-0.882	-1.363	-1.542	0.13	-0.947	-1.402	-0.401	-1.36	-1.725	-2.623	-1.752	-0.989	0.62	-0.28
GSM1672662	0.257	-0.296	-1.792	-0.671	0.262	-1.674	-0.98	0.543	-1.589	0.549	1.007	-0.611	-0.832	-1.248	-1.021	1.199	0.491	-1.461	-2.854	-1.99	-0.38	0.419	1.965
GSM1672664	0.974	0.129	-1.062	-0.309	-1.032	-0.21	-0.317	0.702	-0.006	0.619	-0.02	1.96	-0.939	-0.881	-0.968	1.117	-0.81	-2.161	-2.557	1.395	0.965	1.197	-2.409
GSM1672670	-0.189	-0.503	-1.265	-2.133	0.055	0.623	-0.521	-0.496	-0.194	-2.468	-1.164	1.614	-0.889	-1.027	-0.853	0.346	-0.226	-2.424	-2.938	-0.311	-1.976	-1.174	-0.619
GSM1672673	0.142	-0.849	-1.3	0.03	-1.177	0.367	0.269	-0.248	-1.774	-1.056	0.471	0.496	1.09	-1.42	-0.719	0.333	-0.302	-2.177	-3.414	-1.179	0.986	0.143	1.242
GSM1672674	0.369	-0.165	-1.8	0.83	-0.072	1.402	1.652	-1.312	-0.979	-1.881	-0.942	0.89	0.979	-1.249	-0.671	0.523	0.001	-1.471	-2.951	-1.678	1.823	1.882	1.555
GSM1672677	1.066	-1.02	-0.544	0.509	0.278	-0.558	0.769	-0.252	-1.209	-0.966	-0.072	0.318	-1.178	-0.466	-0.84	1.59	-0.968	-0.362	-1.537	-1.563	0.27	1.08	0.134
GSM1672681	0.355	-0.108	-1.772	1.31	1.812	1.007	0.124	0.742	1.442	0.895	-0.399	1.862	0.815	-0.843	-1.383	0.392	-0.641	-2.589	-3.167	-1.697	0.13	-0.675	0.251
GSM1672686	-0.169	0.025	-1.59	1.288	1.406	-0.449	-1.398	-0.511	0.282	0.974	-0.336	0.936	-0.42	-1.546	-0.665	-0.667	-0.605	0.232	-1.634	-1.911	0.024	0.836	2.579
GSM1672687	0.834	0.772	-1.495	-0.548	0.037	-0.441	0.138	0.453	-1.302	-0.144	-0.225	0.024	0.078	-0.301	-0.576	0.131	0.676	-3.677	-4.104	-2.285	1.44	-1.826	0.989
GSM1672690	0.811	-0.239	-1.774	0.483	1.176	2.724	1.002	-0.287	-0.2	-0.282	0.641	0.389	1.401	0.404	-0.894	1.458	1.257	-2.372	-2.699	-1.676	0.577	0.96	-0.195
GSM1672691	0.214	-0.928	-1.872	-0.506	-0.678	0.155	-0.944	-0.543	-1.224	-0.228	0.967	-1.253	0.944	0.459	-1.351	-0.749	-1.768	0.625	-0.968	-1.948	0.312	-3.114	1.01
GSM1672695	0.501	0.451	-1.979	-0.369	-1.019	-0.067	-1.094	-0.701	1.267	-0.919	-0.46	1.179	-0.51	-1.61	-0.809	-0.162	-1.709	-2.933	-3.888	-1.229	0.532	0.622	0.752
GSM1672700	0.146	2.232	-1.076	0.856	1.324	1.817	0.323	-0.919	-1.269	-0.445	0.486	0.029	0.768	-0.953	-1.03	1.1	0.272	-1.178	-2.287	-1.907	1.145	-0.774	-1.318
GSM1672703	1.463	0.997	-0.418	1.485	-0.188	2.462	1.658	0.351	-0.157	0.139	0.201	0.311	1.208	-0.2	0.088	2.522	-0.492	-2.949	-1.635	-0.172	1.184	0.641	1.846
GSM1672704	0.841	0.935	-1.233	1.559	1.978	1.86	0.057	-0.94	-0.506	-0.116	1.477	0.301	0.578	0.271	0.15	2.13	-0.651	-0.9	-1.769	-1.953	-0.332	1.603	-1.746
GSM1672705	0.843	1.806	-1.815	2.635	1.709	2.662	1.252	1.594	-0.738	0.133	0.997	-0.493	1.617	0.081	-1.285	1.414	-0.274	-1.889	-3.079	-1.3	0.566	0.036	1.775
GSM1672710	0.694	0.188	-1.036	-0.627	-0.713	-0.323	-0.139	-0.637	-1.19	-0.105	0.03	0.393	0.004	-0.474	-1.204	1.129	-1.096	-1.295	-3.023	-1.936	1.024	1.584	0.21
GSM1672711	0.537	0.305	-1.111	0.307	0.943	-0.064	-0.652	-1.192	1.468	-0.095	0.004	-1.145	-0.249	-0.093	-1.35	-0.066	1.227	-0.78	-1.828	-1.468	0.472	0.274	0.069
GSM1672712	0.79	0.375	-1.539	0.767	-0.142	0.537	0.889	-1.137	1.037	-0.499	-0.615	0.441	0.402	-0.065	-0.66	0.028	-0.471	-3.007	-3.203	-2.285	1.521	2.405	1.806
GSM1854798	1.668	3.048	-0.243	2.701	2.217	1.55	0.796	1.598	-0.963	-0.051	0.877	-1.381	1.449	-0.536	-0.897	1.116	-0.525	0.001	-1.83	-0.745	0.439	0.275	1.622
GSM1854800	1.745	0.466	-0.61	1.594	0.669	1.388	1.794	-0.249	0.138	0.158	0.352	-1.186	1.831	-0.93	-0.247	0.471	0.333	-0.062	-1.612	-0.164	-0.717	-1.844	2.459
GSM1854801	1.869	2.05	-0.627	0.894	1.862	1.896	1.205	-1.206	-0.438	0.117	0.912	1.899	1.907	-1.375	-1.33	0.899	1.233	-0.102	-1.578	1.069	0.739	0.746	1.084
GSM1854803	1.627	1.576	0.669	0.069	1.651	0.871	-0.706	-0.913	-0.408	0.31	0.304	2.624	-0.166	-1.254	-0.415	0.797	0.534	-0.016	-0.588	0.44	1.241	-0.782	0.912
GSM1854804	1.405	1.066	-0.375	1.779	2.29	1.796	0.155	0.961	0.202	0.405	1.187	0.911	0.972	-0.763	0.062	1.88	0.974	0.959	-0.295	1.065	0.344	1.387	-0.001
GSM1854806	1.238	2.787	-0.367	1.252	1.944	-1.111	-0.012	0.179	-1.455	0.114	0.449	0.951	1.108	-0.11	-0.569	1.12	0.036	-1.306	-2.043	-0.015	-0.442	0.778	0.705
GSM1854807	1.816	1.953	0.248	2.897	2.272	1.394	1.288	1.336	-1.379	0.081	0.538	2.127	1.743	-0.798	-0.89	0.819	0.46	-0.155	-1.307	-0.919	0.334	-0.406	0.087
GSM1854808	1.787	2.904	-0.461	2.277	2.218	0.908	-0.004	1.261	-1.381	-0.109	0.585	3.297	0.779	0.282	-0.535	1.443	-0.526	0.161	-1.435	-0.359	0.586	-0.643	1.016
GSM1854809	1.098	0.933	-1.28	0.294	1.512	-0.71	0.157	0.616	-1.311	-0.288	0.312	-0.468	1.301	-0.309	-0.447	0.683	0.533	0.621	-0.932	-1.048	-0.035	1.754	0.533
GSM1854811	1.459	1.674	-1.454	-0.344	1.641	-0.287	0.756	-0.516	-1.143	-0.078	0.744	0.675	-0.838	-2.194	-1.014	0.198	-0.463	1.202	-0.347	-0.413	-0.885	2.377	1.431
GSM1854812	1.136	1.802	-1.325	0.679	1.402	0.451	-0.357	0.556	-1.003	-0.254	0.124	2.242	-0.002	0.459	-0.555	1.533	0.52	-0.168	-1.158	-0.795	1.419	0.216	0.456
GSM1854813	1.455	3.341	1.117	2.958	2.43	1.583	1.172	1.253	-1.7	0.047	0.955	-1.215	1.721	-0.75	-0.774	0.901	0.384	0.26	-1.189	0.002	0.438	0.363	1.551
GSM1854814	1.532	3.126	-1.066	0.484	2.399	0.938	-1.417	-0.095	0.423	0.486	1.499	0.432	-0.166	-0.511	-0.701	1.76	0.045	0.513	-1.166	-0.122	-0.431	0.896	1.157
GSM1854816	1.594	1.312	1.794	0.811	0.581	0.213	-0.891	0.157	-0.311	0.382	-0.644	1.191	-0.714	0.205	-0.426	1.284	-0.613	-0.794	-1.863	1.126	0.029	-0.584	1.464
GSM1854819	1.571	0.484	0.008	2.773	2.248	2.297	1.304	1.885	-0.124	0.582	1.72	2.075	1.722	-0.127	-0.442	0.974	0.166	0.301	-1.217	1.245	0.064	-1.278	0.979
GSM1854821	1.915	0.878	0.526	1.794	1.756	1.735	0.62	1.044	-0.199	0.61	1.763	-1.255	1.173	-0.759	-0.736	1.472	-1.337	-0.289	-1.926	-0.076	-0.11	0.835	-0.853
GSM1854826	1.312	1.17	-0.328	0.753	2.198	-0.014	-1.221	0.643	-1.224	-0.012	0.636	-0.115	-0.533	0.093	0.409	0.973	0.187	-0.073	0.723	-1.209	0.7	-1.075	1.773
GSM1854828	1.894	0.597	-1.513	0.508	0.74	0.523	-0.126	0.696	-1.164	0.209	0.374	0.541	0.424	-0.864	-0.606	0.918	0.179	-0.209	-2.276	0.852	0.006	2.432	0.342
GSM1854832	1.91	2.382	0.134	1.629	1.995	0.517	0.244	0.278	0.694	-0.494	0.244	-1.324	0.783	-1.34	-0.831	-0.076	-1.115	0.371	-1.117	0.312	0.222	-0.735	1.456
GSM1854833	1.957	1.848	0.995	-0.023	1.433	0.426	-0.778	0.252	1.07	-0.048	1.022	0.529	0.217	-0.714	-0.434	1.244	-1.256	-1.439	-2.754	-0.624	0.17	0.819	2.259
GSM1854834	1.64	0.491	-0.164	0.437	1.66	1.28	0.926	-0.709	1.225	0.41	0.653	-0.599	1.279	0.76	-0.17	0.439	0.364	0.401	-1.45	-0.541	-0.123	-0.466	1.481
GSM1854835	1.77	1.212	0.179	2.776	2.232	2.092	1.188	1.625	0.356	0.287	1.065	2.126	1.703	-1.205	0.004	2.078	-0.097	0.588	-1.44	-0.342	0.667	-1.541	1.603
GSM1854836	1.546	0.966	0.079	2.921	2.577	1.226	-0.088	1.409	0.089	0.208	1.254	1.85	0.757	0.519	0.308	2.348	0.597	1.071	-0.823	-1.21	1.081	-0.966	1.749
GSM1854837	1.436	0.79	-2.519	-0.759	0.805	-0.767	0.269	-0.138	0.905	0.074	0.562	-1.014	1.262	0.458	0.894	-0.147	-0.269	-0.775	-1.909	0.097	0.165	0.505	-0.043
GSM1854839	1.611	2.261	0.083	1.623	2.395	0.819	0.008	0.562	-1.323	-0.369	0.376	-0.306	0.861	-1.627	-1	0.58	0.767	0.993	-0.851	0.152	-0.107	0.84	1.01
GSM1854840	1.762	1.122	0.363	2.957	2.496	1.716	0.623	1.719	0.663	0.343	0.992	1.846	1.181	-0.88	-0.992	2.406	0.171	-0.194	-1.477	-0.102	0.748	-0.874	1.276
GSM1854842	1.624	1.311	2.156	2.81	2.488	0.563	-0.429	1.937	-1.245	-0.516	0.624	-0.439	0.593	-0.075	-0.263	1.473	-0.4	-1.235	-0.041	-0.526	0.673	-0.313	1.039
GSM1854843	1.614	1.662	2.065	0.257	1.557	-0.486	0.939	0.709	-1.312	-0.754	-0.405	1.168	-1.085	-1.002	-0.784	1.406	-0.509	0.523	-1.256	0.89	0.872	1.169	1.002
GSM1854844	1.44	0.13	-1.031	-1.417	-0.127	0.985	-1.352	-0.164	-0.034	-1.255	1.584	1.028	-1.484	-1.321	-1.244	1.02	0.937	-1.807	-3.116	-0.971	-0.372	-0.257	0.172
GSM1854847	2.197	2.705	0.485	1.373	1.571	0.059	-0.345	0.83	0.341	0.293	0.635	-1.012	0.364	-0.472	-0.66	0.976	1.212	-0.393	-1.784	-0.053	1.794	1.159	1.502
GSM1854848	1.963	2.107	-0.64	1.562	1.968	1.526	0.19	0.937	0.024	0.308	1.433	2.162	0.792	-0.942	-0.954	1.89	-1.311	-0.447	-1.642	-0.073	0.351	0.788	1.611
GSM1854850	1.206	1.912	-1.996	0.532	0.277	1.071	-0.438	-0.909	1.203	-0.653	-0.572	-0.52	0.242	-1.244	-0.743	0.626	-0.995	-1.264	-0.933	0.731	-0.79	1.128	0.836
GSM1854851	1.965	0.557	-0.31	1.81	2.06	1.36	0.285	0.827	-0.439	-0.448	0.667	-0.79	1.228	-1.332	-0.901	0.906	0.917	-1.385	0.135	0.001	0.478	0.591	1.325
GSM1854852	1.64	2.678	0.064	2.166	2.048	-0.007	-1.352	1.122	-0.47	0.042	1.027	-0.337	-0.32	-0.673	-0.698	1.433	-0.648	0.649	1.176	-0.113	0.618	1.174	0.21
GSM1854854	1.669	1.241	-1.885	0.923	2.146	-0.416	0.252	0.407	1.143	-0.125	0.964	1.595	-0.923	-1.348	-1.084	0.946	1.077	0.851	-0.898	0.674	-0.465	0.59	1.079
GSM1854857	1.725	2.464	-1.911	1.113	0.949	-0.051	-0.858	1.087	-1.428	-0.456	-0.252	0.98	-0.49	0.951	-0.62	0.967	-0.364	-1.065	-2.373	-0.605	-0.575	-0.067	1.106
GSM1854860	2.006	2.46	-0.2	1.473	1.991	1.742	0.955	0.705	0.219	-0.426	0.522	2.756	1.444	-1.698	-0.763	1.484	0.757	-0.501	-1.101	0.32	1.51	-0.977	0.639
GSM1854862	2.27	2.532	0.383	3.53	1.823	2.089	1.745	2.205	1.506	0.311	-0.12	3.121	1.699	0.439	-0.58	2.985	1.345	-0.081	-1.646	-0.245	0.425	-2.077	1.468
GSM1854863	1.273	0.705	-1.893	0.908	1.562	-0.089	-0.356	-0.476	0.016	0.329	0.865	1.011	0.363	-0.904	-1.049	-0.37	1.07	-0.51	-1.875	-1.615	0.303	0.032	1.926
GSM1854864	1.157	3.425	0.608	2.696	2.258	0.134	-0.772	1.531	-0.682	-0.09	0.413	0.027	-0.005	-0.089	-0.659	0.97	0.571	1.25	-0.613	0.255	0.189	2.4	0.65
GSM1854867	1.304	2.034	-0.13	1.729	1.302	-0.884	-1.331	0.915	1.065	-0.628	-0.633	1.067	-1.12	-0.342	-0.008	0.679	-0.256	-0.331	-1.693	-1.965	0.497	-0.385	-0.671
GSM1854870	1.466	1.577	-1.176	-0.322	1.245	0.232	1.133	-0.659	-1.243	0.19	1.593	1.097	-0.358	0.065	0.087	0.072	0.222	0.396	-1.305	-0.279	-0.247	0.324	1.64
GSM1854871	1.637	2.82	-1.363	0.722	2.044	0.558	0.101	-0.312	0.592	0.134	1.043	0.936	1.074	-0.951	-1.015	-0.007	-0.669	0.478	-1.092	-1.159	-0.183	2.062	1.092
GSM1854872	1.56	1.751	-1.718	-0.182	1.844	-1.047	-0.387	0.363	0.103	0.216	1.012	0.413	1.501	1.318	-0.19	0.689	-0.682	0.335	-0.351	-0.031	0.581	1.68	1.432
GSM1854874	1.547	3.164	-0.603	-0.506	1.273	0.366	0.81	0.304	0.168	0.218	0.794	0.684	-0.963	0.233	-0.243	2.213	-0.441	-0.202	-1.989	1.005	0.725	2.737	0.728
GSM1854875	1.661	1.459	0.76	3.242	2.267	1.671	1.441	1.684	-0.985	-0.255	0.581	-0.948	2.037	-0.409	-0.575	1.494	1.219	0.328	-0.279	-0.738	0.459	-1.342	1.704
GSM1854879	1.819	0.922	-0.522	1.291	1.734	0.111	-1.279	0.383	-1.345	0.374	1.269	1.417	-0.153	-0.495	-0.342	0.886	-0.347	-0.467	-1.389	0.717	-0.477	1.485	1.807
GSM1854884	1.932	1.525	0.477	3.1	2.349	2.329	1.706	1.737	0.311	0.353	0.854	2.587	1.881	-0.453	1.174	2.218	0.276	0.107	-1.389	-0.474	0.843	-1.101	1.262
GSM1854888	1.478	2.857	0.046	0.98	1.29	-0.527	1.214	0.977	-0.834	1.539	1.262	1.109	-1.393	-0.711	-0.516	0.994	-1.133	0.43	-1.476	-0.118	0.766	1.828	0.953
GSM1854896	2.27	0.604	1.743	-0.493	0.906	1.547	1.184	-0.938	-0.977	0.401	0.574	1.508	1.533	-0.469	0.338	0.947	-0.19	-1.032	-2.302	-0.688	0.422	0.942	0.806
GSM1854897	2.2	1.297	0.197	1.408	1.422	2.425	1.975	0.013	-0.361	0.374	1.462	0.163	2.115	0.347	-0.328	1.411	-1.216	-0.222	-1.728	0.249	0.113	-0.329	0.695
GSM1854898	1.536	3.729	1.578	0.199	1.606	0.665	-1.097	-0.914	-0.28	-0.495	0.191	-0.325	-0.277	-1.084	-0.796	0.947	1.21	0.352	-1.379	-1.49	0.154	1.196	2.914
GSM1854900	1.564	1.038	-0.738	0.847	1.958	0.781	-0.377	0.539	0.768	0.268	1.199	1.418	0.546	0.214	0.267	0.857	0.795	0.24	-1.538	0.008	0.604	1.111	1.482
GSM1854902	1.445	3.505	-0.692	1.531	2.477	-0.688	0.665	0.584	0.61	-0.078	0.857	1.258	-0.669	0.959	-0.43	0.736	-0.951	-0.434	-1.675	0.521	0.547	0.229	0.271
GSM1854907	1.117	0.777	-1.94	-0.409	1.319	0.01	1.004	0.533	-0.044	-0.199	-0.036	-1.229	-1.168	-1.406	-0.822	1.482	-0.502	0.16	-1.791	0.023	-0.186	1.031	1.34
GSM1854911	1.015	0.927	-1.169	0.601	0.272	0.55	-0.84	-1.454	-0.642	0.708	0.864	2.295	0.528	-1.478	-0.673	-1.02	-0.569	-2.057	-2.706	-1.173	-0.973	-1.926	0.777
GSM1854917	1.171	0.222	0.599	-0.575	1.767	-0.118	0.031	-0.086	0.171	0.481	0.874	2.129	1.194	-1.361	-0.673	1.197	-0.573	0.414	-0.75	0.49	0.442	0.425	0.054
GSM1854918	1.768	0.76	0.601	2.842	2.479	2.792	1.941	1.603	0.95	0.304	1.115	1.878	2.397	-0.63	-0.773	1.957	-0.343	-0.12	-1.063	0.86	0.568	-1.37	2.573
GSM1854919	0.808	1.81	-2.023	0.467	2.135	-0.831	-0.23	0.558	-1.265	-0.107	0.815	2.062	1.345	-0.239	-0.339	0.798	0.581	-0.866	-0.462	0.988	0.134	0.432	0.681
GSM1854920	0.98	1.371	-0.013	0.642	2.341	1.711	0.789	-1.213	-1.027	-0.358	0.816	-1.341	1.496	-1.628	-1.445	0.71	-0.214	0.175	-1.107	-0.686	0.099	1.844	-0.114
GSM1854922	2.092	2.002	0.67	2.301	1.758	0.861	0.462	1.475	-0.821	0.442	0.139	-1.36	0.617	-1.429	0.17	1.713	-0.006	0.95	-0.475	1.067	1.069	-0.244	1.12
GSM1854923	1.96	0.871	0.273	2.397	2.628	2.295	0.79	1.439	0.742	0.368	1.689	2.002	1.726	0.661	-0.864	2.208	-0.935	0.709	-1.05	-1.113	0.612	-1.141	0.809
GSM1854924	1.996	0.528	-0.252	2.383	2.826	2.026	0.846	1.69	0.289	0.233	0.981	-0.577	1.47	0.009	-0.547	1.934	1.294	-0.773	0.224	0.906	0.541	-1.979	1.047
GSM1854925	1.254	1.161	-0.214	1.771	1.287	1.299	0.217	0.651	0.573	-0.147	0.146	0.658	0.738	-1.375	-1.033	1.635	-0.233	-0.999	-2.52	0.194	0.229	1.839	1.819
GSM1854926	2.087	1.282	-0.016	2.285	2.466	1.319	0.697	1.207	0.738	0.3	1.39	-0.303	1.697	-1.362	0.494	0.581	-1.162	-1.1	-0.734	0.953	0.449	-0.634	1.358
GSM1854929	2.01	2.199	-0.019	2.296	2.166	0.979	-0.067	0.784	-0.776	0.405	0.924	1.095	0.919	-1.452	-0.411	1.917	-0.107	0.158	-1.329	-0.543	-0.056	0.879	1.152
GSM1854930	1.966	3.239	-1.964	0.34	1.054	-1.101	0.112	0.855	0.326	0.363	0.6	0.991	-1.435	0.438	0.018	0.981	1.048	-0.624	-2.108	0.857	0.639	0.486	1.014
GSM1854931	1.77	2.022	0.518	2.996	2.483	1.781	1.395	1.626	-1.057	0.181	0.911	0.248	1.982	-0.198	-0.464	1.349	0.069	0.738	-0.93	0.747	0.175	-1.406	1.833
GSM1854934	1.666	0.95	-0.266	1.802	1.921	0.492	-0.132	0.765	-1.304	0.026	0.023	-1.436	0.289	-0.386	-0.007	1.146	-0.979	-1.44	0.437	0.936	0.249	0.559	-0.53
GSM1854935	1.919	2.414	-0.908	0.009	1.429	2.075	0.912	-0.562	-0.04	0.072	0.923	2.72	1.577	0.111	-0.057	1.436	-0.286	-1.21	-1.59	1.522	0.396	2.585	0.065
GSM1854936	1.45	0.394	-0.928	-1.392	0.984	0.811	-0.637	-0.48	0.202	-0.638	-0.244	-0.048	0.291	-1.487	-0.936	-0.104	-1.029	-0.193	-2.191	-1.801	-1.134	-0.256	1.323
GSM1854937	1.945	0.788	-0.223	1.733	2.091	0.183	-0.962	1.137	-0.971	0.153	0.905	2.327	-0.109	-1.528	-0.679	0.993	-0.93	-0.783	0.139	0.549	0.08	1.166	1.128
GSM1854940	1.578	2.355	-2.213	2.554	2.239	1.155	-0.355	1.71	0.746	0.271	0.997	1.642	0.383	-0.868	-0.785	1.579	-0.79	0.998	-0.762	0.312	0.118	1.947	1.686
GSM1854950	1.535	0.542	0.149	2.964	2.549	0.589	-1.165	1.991	0.989	0.176	0.987	2.343	-0.148	-0.173	-0.074	2.562	1.294	-0.276	-1.509	-0.144	0.567	-0.948	0.655
GSM1854951	1.879	1.325	0.515	2.948	2.526	1.9	1.499	1.431	-0.676	0.128	0.619	1.832	2.02	0.456	-0.467	1.614	0.108	1.015	-0.517	-0.13	1.026	-0.893	1.295
GSM1854952	1.601	2.725	-0.186	2.227	2.202	0.259	1.023	1.279	0.02	0.18	0.637	2.019	-0.968	0.607	0.409	2.116	0.294	1.158	-0.683	-0.872	0.447	-0.958	1.084
GSM1854957	1.386	1.603	-2.378	0.554	1.68	0.301	-0.512	-0.441	-1.086	-0.654	-0.234	-1.171	0.03	0.269	-0.008	0.976	0.373	1.139	-0.743	0.905	0.075	1.789	1.088
GSM1854958	1.908	1.384	-0.092	2.431	2.542	0.902	-0.072	0.935	1.159	0.35	1.353	1.767	0.91	0.622	0.288	0.546	-0.281	-1.209	-0.656	-1.278	0.647	-1.388	0.31
GSM1854960	1.539	3.401	-2.351	1.214	1.308	-0.67	0.208	0.594	1.211	0.575	1.37	0.038	-1.176	0.869	-0.251	1.062	-0.559	0.28	-1.236	-0.59	-0.109	0.005	1.291
GSM1854962	1.894	2.996	0.621	1.616	1.723	0.165	-0.766	0.939	0.82	0.261	0.821	0.754	0.019	0.798	-0.579	0.909	-0.663	0.397	-1.376	0.974	0.439	-1.462	1.768
GSM1854966	1.585	0.928	0.26	1.927	2.092	1.038	-0.162	1.406	-0.374	0.579	0.738	1.54	0.57	0.392	-0.088	1.721	1.21	1.028	-0.661	0.592	0.239	-1.44	0.614
GSM1854970	1.717	1.39	0.495	3.89	2.206	2.582	2.496	2.091	0.924	0.143	0.807	-0.063	2.852	-0.955	-0.762	2.543	2.027	0.296	-0.665	-1.947	0.148	-1.956	0.195
GSM1854972	1.374	2.501	-1.225	0.905	2.088	-0.089	0.522	0.743	-0.392	0.418	1.572	1.429	-1.12	-0.709	-0.74	1.727	0.432	0.074	-1.869	0.859	0.565	0.912	2.338
GSM1854973	1.893	2.204	-0.947	-0.209	1.16	0.775	-0.02	-0.872	0.638	0.141	1.084	0.53	0.905	-1.027	-0.446	-0.83	0.031	-1.107	-1.672	0.098	-0.045	1.098	1.255
GSM1854974	1.946	2.11	0.373	2.076	2.518	2.167	2.159	1.273	-1.299	0.775	1.801	0.255	2.379	0.517	0.363	1.712	0.465	0.967	-0.839	0.227	1.041	-1.981	1.835
GSM1854977	1.799	1.644	0.745	3.547	2.425	2.376	2.409	1.497	-0.08	0.365	0.794	0.811	2.631	0.765	-0.943	2.211	1.315	-0.064	-1.261	-1.056	0.569	-0.33	1.543
GSM1854979	1.895	1.067	1.653	1.465	1.943	1.561	0.174	0.753	-0.049	-0.111	0.91	0.812	0.926	-0.367	-0.428	1.59	-1.243	0.319	-1.55	-1.443	0.758	1.96	0.965
GSM1854985	1.942	1.448	-0.042	2.726	2.416	2.093	1.514	1.461	-0.391	0.221	1.048	2.057	2.015	-0.556	-0.652	1.802	0.129	-1.327	-0.3	-0.118	0.416	-1.899	1.321
GSM1854987	1.977	3.28	-1.625	0.529	1.803	-0.63	0.525	0.347	1.114	0.326	1.116	0.363	-0.849	0.192	-0.632	0.282	0.943	1.21	-0.334	0.582	-0.428	-0.011	0.414
GSM1854988	1.456	0.947	-0.281	1.299	1.885	0.844	-0.461	0.408	-0.543	0.204	0.999	2.206	0.385	-0.752	-0.36	1.262	-1.356	0.05	-0.095	0.829	1.301	1.08	0.872
GSM1854989	1.932	1.13	-2.458	-1.331	0.585	-0.18	0.595	0.027	-0.299	-0.165	0.428	1.539	0.975	-0.815	-0.855	1.443	-0.805	0.448	-1.643	-0.16	-0.07	1.134	0.554
GSM1854990	1.509	1.845	0.016	1.707	2.383	0.976	-0.247	0.225	-0.937	0.148	1.039	0.815	0.644	-0.902	-0.514	1.039	-0.896	-1.227	-0.694	0.752	0.107	2.033	0.446
GSM1854994	1.876	1.088	0.863	3.07	2.426	1.502	1.332	1.524	-1.112	0.461	1.068	0.337	1.782	-1.164	-1.018	1.243	0.826	1.021	-0.683	0.828	0.695	-0.493	1.091
GSM1854996	1.806	3.323	-2.141	2.395	1.908	0.773	0.637	1.131	1.112	-0.243	-0.139	0.327	0.82	-0.852	-0.885	0.459	-0.139	0.696	-1.106	-0.75	0.578	-1.1	0.581
GSM1854999	1.756	1.185	-0.506	2.17	2.443	2.425	1.234	0.464	0.593	0.591	1.401	0.186	1.877	-0.001	-0.127	1.829	-1.33	1.276	-0.766	0.325	0.735	-1.477	1.233
GSM1855003	2.249	1.545	0.926	3.302	2.549	0.84	0.745	1.781	-1.387	0.447	1.141	-0.1	1.471	0.673	-0.118	1.449	0.92	0.818	-0.937	1.105	0.955	0.064	1.224
GSM1855004	1.672	3.555	0.567	2.706	1.77	-0.006	-0.691	1.94	-0.93	-0.074	0.19	0.004	-0.392	1.138	-0.329	1.635	0.448	-0.619	-1.915	1.538	0.27	-2.289	1.37
GSM1855005	2.052	1.827	0.568	2.991	2.459	2.571	1.642	1.64	0.355	0.552	1.993	-0.295	2.023	-0.504	0.767	2.428	-0.175	1.281	-0.438	1.343	1.542	-0.624	1.496
GSM1855007	1.375	1.713	0.392	2.781	2.586	2.635	1.679	0.888	1.041	0.62	1.019	0.301	2.391	-0.664	-0.636	1.95	-0.516	0.291	-1.878	-0.646	0.251	-1.002	1.424
GSM1855008	1.158	4.152	-0.324	-0.835	0.83	0.309	-1.384	0.066	-0.017	0.442	0.863	1.472	-0.616	-0.814	-0.415	1.33	-0.888	-0.149	-0.131	-0.077	1.115	1.651	0.836
GSM1855010	1.933	1.574	0.213	0.591	2.142	0.333	-0.612	0.175	0.958	0.388	0.735	2.509	0.098	-0.493	1.283	1.166	0.541	0.703	-0.957	1.456	1.39	-0.049	1.476
GSM1855011	2	0.484	0.175	2.614	2.329	1.811	0.828	1.328	-0.035	0.499	2.011	2.082	1.399	-1.089	0.815	1.6	-0.164	0.627	-0.355	-0.68	0.358	-1.465	0.594
GSM1855015	1.97	1.518	-1.412	0.848	1.487	1.111	-0.054	-0.031	-0.279	-0.439	0.896	1.861	0.849	-0.166	-0.627	1.388	0.83	-0.279	-1.435	-1.75	0.217	0.054	0.783
GSM1855031	1.607	1.839	-0.082	2.541	1.435	1.44	1.345	1.518	1.27	0.201	0.569	-0.002	1.669	1.017	0.886	0.94	0.56	-1.142	-1.738	0.219	0.908	-1.45	1.04
GSM1855034	1.652	3.392	1.097	-1.085	0.374	-1.025	-1.089	-0.562	-0.145	0.066	-0.176	1.395	-0.947	-0.405	0.258	0.32	-0.434	-1.369	-2.75	-0.781	0.194	2.491	-0.244
GSM1855035	1.63	1.786	0.307	3.225	2.977	2.881	1.932	1.628	1.036	0.043	1.127	1.796	2.475	0.356	0.098	2.403	0.499	0.888	-0.339	-0.033	1.571	-1.4	0.713
GSM1855036	1.767	2.06	-0.42	1.457	2.18	1.951	0.502	0.511	0.583	0.08	0.685	2.944	1.154	-0.65	-0.614	2.183	-1.413	-0.206	-1.736	0.292	0.446	1.215	2.68
GSM1855040	1.655	1.163	0.121	2.532	1.356	1.961	1.975	1.06	-0.836	0.448	0.236	1.493	2.043	0.763	0.088	1.585	0.276	-0.859	-2.199	0.104	0.51	-1.041	1.182
GSM1855041	1.622	3.766	-0.227	2.844	1.681	1.814	1.158	1.447	0.294	-0.011	0.38	2.343	1.297	0.681	0.176	1.673	0.447	0.116	-1.393	-0.798	-0.033	-2.109	1.284
GSM1855044	1.515	2.567	-1.048	1.584	2.154	0.567	0.143	0.267	0.629	1.619	-0.545	0.943	1	-1.029	-0.839	0.569	0.989	0.607	-1.051	-0.591	0.295	0.973	1.133
GSM1855046	1.187	1.728	-0.827	1.061	1.808	0.053	0.735	-0.145	-0.465	-0.266	0.464	0.356	-0.889	-1.326	-0.828	1.001	-0.783	0.749	-0.413	-0.665	0.045	1.366	0.947
GSM1855048	0.703	0.174	-0.262	-0.452	-0.654	-0.363	-2.16	-0.992	0.134	-0.295	-0.932	-0.974	-1.781	-0.42	-0.169	-0.92	-0.464	-1.259	-2.591	-1.193	-1.141	0.342	0.808
GSM1855052	2.088	1.274	0.286	2.951	2.463	1.933	1.795	1.486	-1.051	0.44	0.766	0.168	2.092	-1.332	0.881	1.308	0.526	1.199	-0.836	-0.376	0.677	-1.812	1.329
GSM1855053	1.211	1.506	-1.375	0.309	1.506	-0.799	1.189	0.35	0.703	0.127	0.536	-0.076	-0.784	-0.788	-0.531	0.463	0.12	-0.794	0.422	-1.324	-0.32	1.004	0.855
GSM1855054	1.348	2.213	-0.143	0.967	2.113	-0.362	1.078	0.278	0.804	-0.169	1.248	-0.457	-0.568	0.219	-0.113	0.515	0.92	-1.152	-0.749	1.066	-0.35	1.081	0.676
GSM1855055	1.732	1.307	0.317	3.392	2.774	2.624	1.741	1.666	0.834	0.277	1.451	1.246	2.189	-0.192	-0.486	2.551	1.011	0.31	-1.606	0.746	0.355	0.663	2.34
GSM1855056	0.908	0.396	-1.1	1.349	0.106	-1.257	-0.129	-1.189	-1.538	1.457	1.408	0.919	0.475	-1.401	-0.941	0.162	-0.132	0.209	-0.641	-1.434	-0.391	0.078	1.348
GSM1855057	1.358	0.709	-0.418	0.83	0.925	-0.442	-0.258	0.335	0.509	0.715	-0.473	-0.388	-0.552	0.419	-0.765	0.739	-0.777	-0.351	-1.842	-0.807	0.603	-0.422	0.236
GSM1855059	1.442	0.799	-1.968	1.71	2.212	0.11	-1.024	0.457	1.119	0.245	1.246	-0.694	0.18	0.376	-0.261	0.532	-1.461	1.016	-0.823	-0.033	-0.519	-0.361	0.446
GSM1855061	2.145	1.446	0.917	3.589	2.678	2.085	1.683	1.763	-0.242	-0.065	0.815	-0.685	2.185	-1.425	-0.98	1.899	1.293	0.069	-1.637	-0.4	0.075	-1.298	2.054
GSM1855063	1.796	0.625	0.112	2.287	1.645	2.014	1.823	0.911	0.117	-0.143	-0.278	0.059	1.718	-0.711	-0.528	2.028	-0.214	-0.589	-1.994	-0.72	0.921	-1.213	1.963
GSM1855067	1.584	2.153	-1.248	-0.166	1.437	-0.056	1.483	-0.407	-0.742	0.128	0.383	2.255	-0.819	-0.99	-0.326	0.971	0.275	-0.448	-0.814	0.293	0.517	0.287	1.373
GSM1855069	1.707	1.853	-2.145	1.392	0.861	1.136	0.677	0.681	-0.033	0.075	0.083	-1.322	0.557	0.239	-0.248	1.445	-0.719	-0.673	-2.111	-0.493	0.773	-1.286	1.489
GSM1855070	1.441	0.501	0.436	2.845	2.81	2.016	1.138	1.447	-0.095	0.378	0.965	-0.936	1.718	0.01	-0.27	1.684	-0.512	-0.832	-0.225	-0.165	0.538	-0.923	0.132
GSM1855071	1.861	1.225	0.078	0.898	1.809	1.832	1.484	0.22	-0.531	-0.001	0.065	0.877	1.632	0.102	1.047	1.175	0.051	-1.326	0.787	0.711	1.42	-1.237	0.854
GSM1855072	2.002	1.501	0.18	3.121	2.171	1.605	1.114	1.305	-0.026	0.239	0.964	1.178	1.475	0.651	-0.078	2.249	0.886	-0.51	-1.334	0.726	0.492	0.274	1.394
GSM1855074	1.257	1.035	-0.897	0.727	1.134	-0.15	-0.788	0.144	1.362	-0.342	-0.488	-0.889	-0.652	-1.263	-0.893	0.463	-0.882	-0.13	-1.825	-0.784	0.272	1.299	1.042
GSM1855075	1.475	3.082	-0.35	1.494	2.563	0.77	-0.002	0.089	1.171	0.639	0.92	1.264	0.755	-0.931	-0.74	0.348	0.797	-0.145	-1.172	-1.066	-0.545	-0.723	0.37
GSM1855076	1.456	0.709	0.464	3.812	2.865	2.65	2.315	1.949	-0.202	0.462	1.217	1.208	2.793	0.751	-0.122	1.854	1.078	0.291	-0.822	-1.103	0.133	-1.201	1.643
GSM1855077	1.415	1.044	-1.411	0.223	1.068	0.61	0.034	-0.069	0.391	0.089	0.156	-0.137	0.388	0.253	-0.815	0.835	0.576	-0.644	-2.776	-1.232	0.657	-0.047	1.193
GSM1855080	1.593	2.596	-2.211	1.78	2.328	0.332	-0.579	0.494	0.818	0.267	1.473	-1.519	0.358	0.656	-0.051	0.944	-0.76	1.195	-0.593	0.192	0.621	-0.757	0.971
GSM1855081	1.904	2.639	1.686	2.022	1.344	0.947	1.382	0.783	0.561	-0.435	-0.529	-0.211	1.383	0.97	-0.516	0.537	-0.095	-0.517	-1.958	-1.552	0.332	-1.265	1.916
GSM1855082	1.371	3.047	0.244	2.31	2.268	0.986	-0.822	1.377	0.549	0.337	0.61	1.07	-0.17	0.132	-0.08	1.913	0.171	-0.583	0.177	0.574	1.084	-1.425	0.359
GSM1855086	1.223	2.577	0.381	3.006	2.621	2.184	0.842	1.261	0.247	0.228	0.834	1.427	1.52	-0.716	-0.387	1.735	0.119	0.063	-1.722	-0.174	0.249	-1.302	2.297
GSM1855087	1.597	1.718	-1.432	2.161	2.632	1.639	-0.341	0.986	0.424	-1.239	0.587	3.912	0.768	0.556	-0.367	2.144	-0.992	-0.449	-0.786	2.254	0.634	0.09	1.252
GSM1855088	1.073	1.288	0.145	2.277	1.789	0.469	-0.812	0.953	-0.608	-1.224	-0.639	-0.005	-0.362	-1.244	-0.494	0.801	0.458	1.183	-1.11	-0.086	0.076	1.598	2.7
GSM1855091	1.336	0.875	0.019	2.662	2.516	1.963	0.979	1.118	0.01	0.427	1.139	1.202	1.432	0.666	1.169	1.676	-0.2	0.42	0.148	-1.48	0.376	-1.599	1.051
GSM1855092	2.256	1.285	0.042	2.138	2.054	1.857	1.036	1.046	-0.489	0.394	1.351	1.982	1.833	0.749	-0.437	1.958	-0.98	0.717	-1.361	-0.816	0.57	-1.41	1.401
GSM1855093	2.352	2.583	0.807	3.047	2.513	2.491	2.195	1.294	-0.587	0.66	1.372	0.247	2.491	0.46	-0.556	1.673	0.67	-0.515	-1.918	0.47	0.631	-0.793	2.014
GSM1855098	1.263	0.815	-0.382	0.448	1.499	0.955	0.208	0.297	0.928	0.214	1.09	0.573	1.041	-1.048	-0.506	0.826	-0.586	-0.337	-2.096	-1.482	0.859	1.455	1.36
GSM1855099	1.457	0.839	-1.63	-0.084	0.353	-0.973	1.085	0.052	1.271	-0.668	-0.609	0.323	-1.164	-1.619	-0.861	0.043	0.896	-0.277	-2.14	-0.337	-0.329	1.634	-0.57
GSM1855100	1.933	0.679	-0.273	0.527	0.705	1.395	1.11	-0.484	-0.726	0.173	-0.048	0.436	0.926	1.3	-0.208	1.09	1.171	-0.266	-2.281	0.528	0.777	2.486	2.064
GSM1855102	1.617	1.2	0.827	3.423	2.544	2.788	2.15	1.72	0.934	-0.532	0.098	0.949	2.536	0.721	0.377	2.361	0.593	1.025	-1.003	-0.072	-0.026	1.603	2.549
GSM1855104	0.49	1.861	-1.167	0.455	-0.073	0.867	0.775	-0.441	1.068	-0.054	-0.436	1.316	0.605	-1.99	-0.547	1.373	-0.877	-1.458	-2.222	-1.284	-0.757	1.55	-1.198
GSM1855105	1.425	-0.139	-0.274	1.947	2.177	0.654	0.225	1.461	0.91	0.384	0.775	-0.626	0.932	-0.237	1.481	1.114	0.982	-1.089	-0.563	-0.095	0.474	-1.26	1.312
GSM1855106	2.437	0.906	0.444	3.07	1.689	1.49	1.648	1.148	1.318	0.28	0.793	0.622	1.862	-1.589	-0.155	0.845	0.572	-0.394	-2.047	-0.906	-0.219	-1.462	2.278
GSM1855110	1.818	1.331	0.694	3.081	2.32	2.024	1.795	1.502	0.069	0.456	0.514	-0.567	2.058	0.571	-0.752	2.048	0.851	0.561	-1.037	0.089	0.783	-1.424	1.382
GSM1855111	0.611	0.992	-1.379	-0.107	1.928	-0.231	-0.779	-1.002	-0.136	-0.082	0.409	-0.086	0.628	-1.681	-1.112	0.832	-1.061	-0.09	-1.329	-0.601	-0.497	-0.406	0.242
GSM1855112	1.534	3.435	-0.092	3.144	2.367	0.384	-0.706	1.62	-0.469	-1.261	-0.379	0.306	0.305	-0.126	-0.211	1.961	1.161	-1.353	-1.265	-0.41	0.818	0.424	1.563
GSM1855113	1.222	2.24	-1.769	-0.304	1.094	-0.536	0.666	0.148	-1.263	0.183	0.55	0.18	-1.102	-0.686	-0.39	1.013	0.045	-0.929	-0.538	1.083	-0.134	0.922	0.672
GSM1855119	1.524	0.356	-0.684	-0.179	1.166	-0.782	1.203	0.285	0.231	-0.793	-0.086	0.592	-0.869	-0.12	-0.326	-0.401	0.128	0.111	-1.549	-0.929	0.35	1.453	0.851
GSM1855124	1.616	1.122	-1.513	-1.073	0.038	-0.832	0.684	0.369	-0.771	-0.502	-0.249	2.312	0.958	0.337	0.463	1.063	-0.721	-0.017	-2.016	0.215	-0.432	0.914	2.195
GSM1855126	1.064	-0.302	-1.349	-1.048	0.052	-0.863	0.774	0.244	-1.494	1.589	-1.306	0.721	1.116	-0.072	-0.168	0.33	-0.161	0.669	-1.45	-1.509	-0.32	1.581	-0.119
GSM1855127	1.741	1.067	-0.259	2.824	2.488	0.617	-0.24	1.756	-0.832	0.376	1.027	1.063	0.692	0.154	-0.739	1.712	0.198	-0.998	-0.708	-1.305	0.364	-0.423	1.091
GSM1855129	1.79	0.85	-0.069	2.707	1.661	0.775	0.588	1.635	-1.054	0.14	-0.044	0.981	0.756	0.389	-0.916	1.576	0.549	0.279	-1.644	-0.23	0.971	-1.741	1.256
GSM1855133	1.818	1.774	-0.036	2.513	2.276	0.879	-0.268	0.979	-0.664	0.199	0.831	0.885	0.612	-0.424	-0.473	1.834	0.616	0.561	-1.337	-1.423	0.293	1.808	1.7
GSM1855134	1.671	1.647	2.083	-0.308	1.5	-0.025	1.055	0.452	-1.019	0.462	1.322	2.892	-0.774	0.32	0.342	1.508	-0.773	-1.327	-0.942	0.116	0.595	0.734	1.464
GSM1855141	1.193	3.184	-0.804	0.914	1.333	0.562	-0.218	0.299	1.192	-1.385	-0.441	-1.364	0.407	-0.797	-0.854	0.792	0.735	0.918	-0.497	-0.036	0.063	0.597	0.061
GSM1855143	1.413	2.059	0.838	3.178	2.109	1.549	1.397	1.53	-0.538	0.584	0.98	0.498	1.799	-1.22	-1.163	1.807	1.012	0.337	-0.388	-0.995	0.08	-1.084	0.604
GSM1855149	1.691	3.967	0.297	2.715	2.234	0.67	0.076	1.564	-0.982	0.056	0.62	1.387	0.7	-1.573	-0.363	1.853	-0.279	0.93	-0.732	-1.254	0.84	-0.852	1.18
GSM1855151	1.217	2.336	-2.242	-0.212	1.679	1.107	0.443	1.137	0.442	-1.079	-0.074	1.197	1.224	-2.007	-1.085	-0.558	-0.601	-0.166	-1.44	-1.052	-0.021	-0.959	-1.11
GSM1855152	1.477	0.727	0.118	2.437	2.131	1.982	1.366	0.73	0.354	0.177	0.323	0.526	1.542	-1.18	-0.738	1.786	-0.12	0.52	-1.052	-0.736	0.752	-1.715	0.482
GSM1855158	0.24	1.804	-1.619	1.328	1.686	-0.532	0.703	-0.301	-0.829	1.367	-0.737	-0.399	-0.911	-0.104	0.635	0.401	-0.334	1.179	0.342	-0.368	-0.981	1.016	0.857
GSM1855159	1.393	1.875	-1.987	2.348	2.34	0.259	-1.286	1.045	-0.914	-0.144	0.488	1.257	-0.369	-0.826	-0.34	0.736	0.019	-0.191	0.698	-0.56	0.221	-1.696	-0.227
GSM1855162	1.616	0.707	0.476	1.751	2.115	0.579	0.159	0.492	-1.317	0.526	0.726	0.53	0.798	-0.273	-0.225	1.475	-1.087	-1.379	-0.354	-0.574	0.739	-0.733	-0.309
GSM1855163	1.541	2.969	-0.25	2.44	0.841	0.24	0.816	1.091	0.637	-1.404	0.937	-1.534	0.549	1.404	-0.123	0.603	0.349	0.182	-1.731	-1.151	-0.599	-1.876	2.35
GSM1855164	2.112	2.24	-1.322	1.024	1.014	1.729	0.874	-0.16	-0.291	0.633	2.462	1.321	1.604	-0.261	1.127	1.9	-1.346	-0.438	-1.556	1.358	0.126	1.544	1.083
GSM1855165	1.281	0.22	-1.634	-1.243	0.488	-1.113	0.57	-0.176	0.688	-1.087	-0.764	1.282	-1.355	-0.987	-0.682	0.124	-0.672	-0.38	-2.267	-0.762	-1.639	0.756	-1.13
GSM1855169	2.287	1.741	-2.607	1.031	1.796	0.361	-0.632	0.621	0.883	0.364	1.134	1.647	0.247	0.582	-0.878	1.461	1.176	-0.942	-1.912	0.876	-0.153	1.32	0.839
GSM1855170	1.558	2.896	-0.889	-0.693	0.337	-0.083	1.05	0.113	0.404	0.127	-0.31	1.661	-1.296	-1.356	-0.876	1.884	0.628	-0.553	-1.897	-0.948	-0.033	1.298	-0.362
GSM1855172	0.862	1.149	-0.227	2.23	1.809	1.464	1.485	1.002	1.262	0.042	0.504	0.774	1.877	0.093	-0.539	0.698	-0.119	0.796	-1.274	-0.147	0.503	-0.794	1.885
GSM1855174	1.954	0.932	0.199	2.292	2.072	0.862	0.27	0.665	-1.79	0.867	1.078	0.07	0.882	1.008	-0.831	0.571	0.102	0.312	-1.081	-0.304	0.148	0.099	0.483
GSM1855177	1.254	1.612	0.57	3.981	2.211	1.615	1.798	2.408	-0.448	-0.217	0.213	1.033	2.162	-0.547	-0.363	1.521	1.89	-1.164	-0.911	-0.393	0.808	0.819	1.242
GSM1855182	1.635	1.424	-1.739	1.27	2.082	0.862	-0.337	0.43	1	-0.236	0.278	-0.982	0.943	-0.017	-0.182	0.467	-0.605	-1.098	-0.679	0.538	0.484	1.548	0.459
GSM1855183	1.765	0.55	0.831	3.03	2.014	1.855	2.111	1.105	-1.451	0.296	0.604	-0.7	2.232	1.383	-0.191	1.017	0.533	-0.031	-1.624	-0.115	0.421	-1.366	1.626
GSM1855187	1.294	0.29	-0.816	0.997	-0.112	-0.835	-0.53	-0.6	-0.12	-0.989	1.512	0.626	-0.267	-1.034	-0.783	0.93	-0.113	-1.085	-2.577	-1.371	-0.139	0.023	0.816
GSM1855188	1.4	2.518	0.001	0.427	1.944	-0.173	-0.889	-0.243	-1.678	-0.884	0.118	0.027	-0.162	0.674	-0.319	1.353	0.067	-1.026	-0.179	-0.713	-0.26	1.023	0.38
GSM1855192	1.794	2.407	-0.869	1.037	2.301	0.758	0.217	-0.104	0.187	0.622	1.936	0.357	1.081	1.339	-0.228	0.411	0.849	0.331	-1.258	0.696	0.282	0.184	0.111
GSM1855195	1.022	0.355	-1.472	0.485	0.767	0.808	-0.391	0.959	-0.477	0.591	1.117	0.095	0.639	0.775	0.462	0.006	-1.229	-1.113	-1.279	0.029	0.218	2.536	-0.661
GSM1855200	1.321	0.901	-1.671	-0.34	-0.204	-0.104	-1.051	-0.438	-0.086	0.177	-0.108	2.328	-1.215	0.38	-0.157	1.114	0.766	-0.696	-2.403	0.503	-0.542	0.382	0.978
GSM1855208	2.006	1.574	0.426	2.338	1.654	2.412	2.2	0.915	0.599	0.592	0.435	0.106	1.954	-0.441	0.877	2.416	-0.101	0.539	-0.525	-0.437	0.337	1.537	1.996
GSM1855209	0.921	-0.582	0.302	-0.963	-0.896	-1.044	-1.753	-0.843	-1.885	0.527	-1.273	-0.853	-0.642	-1.901	-0.983	-1.079	-1.376	-0.859	-1.894	-0.524	-1.171	-0.434	3.737
GSM1855210	2.154	2.373	-0.408	2.455	1.48	1.501	1.198	1.296	0.06	1.291	1.408	0.482	1.213	-1.211	-0.785	1.505	0.299	-0.467	-2.058	-0.307	0.286	-1.525	2.211
GSM1855212	1.79	0.67	1.084	3.342	2.454	2.521	1.816	2.124	0.993	-0.162	0.201	-0.614	1.986	-0.89	-0.873	2.591	1.163	-1.104	-0.442	-1.146	0.409	-0.146	1.349
GSM1855213	1.746	1.354	-2.23	0.285	1.15	0.043	-0.15	0.271	0.223	-0.087	0.016	-1.288	0.167	-1.055	-1.01	-0.144	-0.622	0.046	-1.275	-0.267	0.084	0.038	-0.251
GSM1855214	1.459	3.897	-2.153	1.573	1.889	-0.706	0.023	0.927	-0.391	-0.148	0.323	-0.938	1.258	1.072	-0.605	1.999	0.297	1.152	-0.662	-0.129	0.287	-0.343	1.385
GSM1855215	1.88	1.795	0.344	1.909	1.396	1.196	0.648	0.716	0.688	0.131	-0.47	-0.257	0.632	-1.377	-0.863	1.842	-0.272	0.53	-0.715	0.888	0.707	-1.522	0.857
GSM1855217	1.392	1.371	-1.097	1.64	1.938	-0.788	0.555	0.848	0.844	-0.13	0.601	1.022	-0.895	-0.799	-0.704	0.88	-0.879	0.733	-1.503	0.077	0.121	0.534	0.045
GSM1855218	1.229	1.513	-1.633	1.949	2.328	-0.458	0.502	0.981	-1.242	0.185	0.962	1.051	-1.074	0.414	-0.109	0.88	-0.407	-1.25	-0.491	-0.04	0.245	-0.762	0.82
GSM1855219	1.461	1.25	-1.909	-1.005	-0.241	-0.669	-1.271	0.145	1.082	0.473	0.282	0.664	-1.2	-0.205	0.036	1.127	-0.623	-0.813	-2.712	0.236	0.984	-1.255	0.341
GSM1855221	1.791	1.234	0.335	2.738	1.855	1.443	0.685	1.398	0.665	0.033	-0.37	0.363	0.65	-1.176	-0.664	1.963	0.493	-0.499	-1.795	0.725	0.876	-2.066	1.517
GSM1855222	2.52	2.081	0.24	3.358	2.258	2.657	2.83	1.481	0.043	0.378	1.188	2.238	2.946	0.838	-0.628	2.243	1.238	-0.065	-1.269	0.275	0.345	-0.986	2.051
GSM1855223	1.656	2.48	0.32	2.727	1.758	0.214	0.083	1.474	0.698	-0.252	-0.008	1.266	0.321	0.738	-0.795	0.451	0.658	0.537	-1.356	-0.612	0.558	-1.843	0.991
GSM1855229	1.176	1.247	1.037	3.011	2.165	-0.237	1.082	2.099	0.503	-0.122	-0.079	-0.75	-0.938	-0.329	-0.213	2.398	1.934	-1.122	-0.49	-0.139	0.66	-1.006	1.098
GSM1855236	1.749	1.08	-0.233	3.254	2.091	2.296	1.903	1.702	0.717	0.221	0.155	0.879	1.97	-0.483	-0.558	2.561	0.715	1.108	-0.916	-0.702	0.213	-1.796	1.138
TCGA-L9-A444	5.109	2.339	-0.982	4.407	2.744	3.503	3.125	3.014	-1.477	3.141	0.992	-0.195	4.532	-0.242	-0.836	0.98	0.711	-0.541	-1.194	-1.558	0.632	1.901	1.494
TCGA-MP-A4SW	4.488	1.573	2.037	2.131	2.44	0.643	-1.179	1.55	-0.903	2.489	1.5	-1.276	0.958	-0.702	-0.424	0.505	-0.527	0.629	0.571	-1.461	0.483	1.695	2.53
TCGA-86-A4P8	4.621	2.631	-1.105	2.873	2.815	1.601	0.683	2.887	0.645	3.471	0.882	0.407	3.04	-1.562	-1.194	0.838	0.246	0.727	0.151	-0.158	0.765	0.415	0.201
TCGA-93-A4JN	4.518	1.22	0.453	1.687	2.732	-0.337	0.645	0.042	0.376	0.598	1.225	0.121	-0.703	-0.232	-0.068	0.142	0.447	-0.486	-1.398	-1.038	-1.011	1.132	1.165
TCGA-97-A4LX	5.115	2.837	-1.231	4.439	3.188	3.058	2.451	2.933	-1.135	3.053	1.429	-0.174	4.091	-0.657	-0.553	1.169	0.849	-1.176	0.967	-0.554	1.232	2.237	-0.661
TCGA-97-A4M0	4.683	2.46	-1.337	2.476	2.992	2.121	0.35	0.913	-0.158	1.733	0.841	0.216	1.824	-1.635	-1.044	1.421	-0.417	-0.783	-0.735	-1.009	1.283	0.935	1.537
TCGA-97-A4M1	4.648	1.634	-2.609	0.05	1.783	-0.481	1.169	-0.063	-0.334	0.356	0.242	-0.299	-0.382	-0.382	0.706	-0.771	0.355	-0.961	0.51	-0.35	0.514	1.259	0.606
TCGA-97-A4M3	4.648	-0.031	-1.806	0.234	1.019	-0.516	-0.617	0.699	0.15	1.913	0.154	2.334	-0.818	-1.282	-1.048	1.096	-1.492	-0.527	-1.804	-0.395	0.27	1.809	0.809
TCGA-97-A4M2	4.628	2.802	-0.698	2.617	2.433	1.129	-0.168	2.101	-1.247	2.795	0.145	1.012	1.827	-0.003	0.712	0.967	-0.837	1.12	-0.421	0.748	1.45	0.897	-0.954
TCGA-97-A4M5	4.632	0.898	-3.581	1.678	2.186	0.169	-0.862	1.104	0.157	1.648	1.059	1.151	0.757	-1.317	-0.575	-0.039	-1.063	-0.112	-1.588	-0.21	0.557	0.689	0.32
TCGA-97-A4M7	4.537	1.79	-1.014	3.076	3.218	1.879	0.261	1.204	-0.373	1.801	1.188	-0.499	1.383	-1.593	-1.358	1.491	0.153	-0.478	-0.306	-0.445	0.155	0.438	0.756
TCGA-97-A4M6	4.385	3.196	-0.816	3.648	2.982	3.119	1.645	1.935	0.584	2.201	1.104	0.695	2.66	-1.296	-0.874	1.613	0.799	-1.373	0.378	-0.462	1.347	0.896	-0.031
TCGA-86-A4P7	5.057	0.97	1.858	2.64	1.935	-0.08	-1.37	2.37	0.347	3.028	1.061	0.137	1.401	-1.631	-0.932	0.315	0.008	-0.78	-1.837	-0.035	-0.119	0.805	-0.344
TCGA-44-A4SU	4.447	1.758	-1.027	2.776	2.806	1.348	0.081	0.69	-1.022	1.339	1.119	0.542	1.314	-1.69	-1.26	0.886	0.513	0.167	-1.143	-0.07	0.211	-1.123	0.1
TCGA-53-A4EZ	4.099	0.459	-2.261	-0.353	-0.322	-0.059	-0.775	-0.606	0.013	0.262	0.729	-0.327	-0.79	-0.87	-0.431	0.35	-1.119	-0.278	-1.105	-0.271	-0.218	0.977	-0.242
TCGA-55-A48Z	4.952	1.958	-2.598	2.221	1.484	1.445	1.168	1.666	0.666	3.416	1.255	-0.841	3.094	-0.484	-1.403	0.304	-1.404	-0.315	-0.946	-1.374	0.327	0.662	1.188
TCGA-55-A494	4.258	1	-1.151	-1.417	0.496	-0.968	-1.462	-0.888	-0.244	-0.416	0.043	0.232	-0.289	0.181	1.077	0.155	0.079	-1.16	-2.483	-0.77	-0.278	3.312	-0.411
TCGA-L9-A443	4.742	1.617	-2.019	2.526	2.232	1.424	0.954	0.608	1.39	0.954	0.135	1.002	1.782	-0.908	-0.462	0.795	-0.002	-0.323	-1.154	-1.711	0.392	0.627	0.162
TCGA-L4-A4E6	4.961	1.515	-1.428	2.987	2.45	0.79	-0.287	2.856	-0.108	3.536	1.696	1.281	2.262	-0.593	-0.13	0.418	-1.229	0.372	-1.014	0.203	1.158	0.929	1.181
TCGA-62-A470	4.31	-0.288	-3.409	-0.893	-0.196	-0.181	1.104	-0.167	-0.003	0.823	-0.346	0.879	-0.813	-2.085	-1.265	0.963	0.204	-0.732	-1.945	-0.396	0.162	2.911	-0.091
TCGA-86-A456	4.938	1.378	1.225	2.963	2.694	1.847	-0.139	2.548	-0.207	3.716	1.606	1.813	2.744	-1.371	-0.996	1.63	-1.381	-1.274	-0.146	-0.277	1.816	0.583	0.329
TCGA-91-A4BD	4.592	2.094	-0.881	2.087	2.365	-0.229	1.258	1.481	0.404	2.132	0.937	-0.168	1.122	-0.804	0.01	0.025	-0.853	-0.512	-0.933	-0.036	1.766	0.612	1.943
TCGA-J2-A4AE	4.439	0.675	1.105	3.464	2.563	0.817	-0.303	2.248	-1.544	2.767	0.949	-0.37	1.989	-1.448	-0.972	0.902	0.006	-1.395	-1.357	-0.583	0.604	-0.031	-0.162
TCGA-J2-A4AG	4.675	1.802	-0.637	3.468	2.58	1.003	-1.262	2.458	0.831	2.606	0.763	2.225	1.125	-0.781	-0.466	2.555	1.108	-0.909	1.098	-0.348	1.083	1.109	1.553
TCGA-44-A479	4.905	1.941	-0.903	3.512	1.671	2.366	1.822	2.302	-0.302	2.803	0.027	-0.016	2.656	-0.784	-0.403	1.901	0.528	-1.026	-1.887	-0.023	-0.062	-0.262	-0.246
TCGA-38-A44F	4.575	2.387	-0.956	4.245	2.922	3.167	2.104	2.5	0.499	2.926	1.233	2.915	3.515	0.133	0.856	2.16	1.334	-1.118	0.884	-1.037	2.024	0.05	1.232
TCGA-44-A47B	4.434	0.927	0.388	1.562	1.325	1.689	0.142	0.937	-0.366	2.028	-0.125	-0.127	1.548	-1.869	-0.952	0.879	-0.578	-0.991	-1.169	-1.412	0.083	0.746	-1.927
TCGA-44-A47G	4.862	2.405	-1.131	3.806	3.015	3.038	1.919	2.169	0.255	2.544	1.251	0.478	2.981	0.065	-0.308	2.105	0.708	-0.688	-1.424	-0.741	1.658	-0.154	-0.584
TCGA-55-A4DF	5.38	1.955	1.277	3.419	2.373	2.301	1.026	2.157	-0.241	2.448	0.534	-1.148	2.541	-1.203	-0.727	1.132	0.056	-0.315	-1.055	-0.77	-0.319	-0.008	-0.589
TCGA-55-A492	4.336	0.593	0.202	1.177	1.878	-0.862	0.68	0.331	0.383	0.467	-0.345	-1.154	-0.666	-1.475	-1.014	-0.743	-0.186	0.159	-1.466	-0.634	0.183	1.583	0.309
TCGA-55-A4DG	4.508	1.514	-1.059	2.953	2.469	0.78	0.211	0.898	0.244	1.572	0.105	1.22	1.322	-1.658	-1.19	0.353	0.976	-0.832	0.319	-1.465	0.91	0.089	1.214
TCGA-62-A46P	4.132	-0.354	-1.369	-0.017	0.371	-1.108	-0.348	0.667	-0.888	1.455	-0.45	0.709	-1.2	-1.187	-0.628	0.019	-1.183	-0.826	-1.956	-0.808	-0.132	1.499	0.084
TCGA-62-A46R	4.388	2.149	-0.168	2.126	2.82	0.499	-0.502	0.013	0.471	0.074	0.387	-1.544	0.449	-0.019	0.201	0.002	0.791	0.52	-0.438	-0.053	1.33	-0.026	-0.863
TCGA-62-8397	3.897	2.787	-3.155	-1.129	1.977	0.881	-1.458	1.162	0.243	0.359	0.59	0.853	0.477	-1.646	-0.872	-0.799	0.862	-0.026	-1.222	0.471	0.473	0.901	-0.906
TCGA-50-8457	4.269	2.595	-0.414	3.422	2.914	1.07	0.293	1.702	0.319	2.312	0.904	-1.178	1.831	-1.038	-0.849	0.704	0.228	-0.17	-0.576	-1.328	0.75	1.547	1.481
TCGA-62-8395	4.262	0.864	-2.266	0.935	1.929	-0.867	0.532	0.9	0.157	2.307	0.585	-0.011	0.152	-2.402	-1.704	-0.307	0.79	-0.839	-1.956	-1.438	0.511	0.231	-1.577
TCGA-69-8453	4.412	2.873	1.135	4.271	3.155	2.519	0.862	2.908	-0.237	4.025	1.186	1.391	3.224	-0.009	0.74	1.693	0.099	-0.896	0.367	-0.438	1.657	0.747	1.64
TCGA-50-8460	4.392	2.942	2.002	2.768	2.985	0.358	-1.364	0.89	-1.218	0.86	0.385	0.866	0.172	-1.295	-1.243	0.868	0.533	0.742	-0.377	-0.682	0.229	1.368	-1.442
TCGA-62-A46U	5.081	3.831	-1.106	2.669	1.574	3.616	2.331	1.401	0.952	3.957	0.371	0.711	3.928	-0.903	-0.707	1.534	0.277	-0.939	1.183	0.188	0.232	2.266	0.15
TCGA-97-8552	4.274	2.08	-1.042	1.982	2.864	0.161	0.706	0.598	-0.735	1.331	0.971	-0.343	-0.263	-1.444	-0.676	1.018	-0.185	-1.207	0.551	-0.332	0.837	1.04	0.557
TCGA-91-8497	4.324	2.162	-0.583	2.822	2.684	-0.262	0.731	1.544	-1.414	1.742	0.577	-1.397	0.037	0.368	1.261	1.18	0.782	-0.449	-1.282	0.847	1.82	0.877	0.963
TCGA-86-8669	4.208	0.979	-1.475	1.442	1.509	0.829	-0.932	1.311	0.577	2.369	-0.528	-1.311	0.635	-0.246	-0.004	1.051	1.146	1.109	-0.015	-0.029	-0.044	0.801	2.059
TCGA-86-8671	4.662	3.382	-0.109	5.257	3.238	4.585	3.268	3.467	1.086	3.75	1.204	-1.187	4.599	-0.034	-0.184	2.777	1.415	0.958	0.518	-0.569	1.791	3.164	0.117
TCGA-86-8668	4.676	2.893	1.017	2.377	2.718	1.077	-0.238	0.91	-1.211	1.964	0.663	-1.779	1.273	-0.97	-0.484	0.793	-0.801	0.378	-0.037	-0.85	-0.166	1.439	0.679
TCGA-91-8496	4.039	3.01	1.254	0.277	1.905	-0.314	1.065	0.94	1.149	1.326	0.001	-0.898	-0.036	0.178	1.133	0.432	-0.697	-0.179	-0.883	1.028	0.869	0.712	0.561
TCGA-78-8648	4.791	1.841	-0.897	3.589	2.072	1.107	0.326	2.892	0.511	3.706	0.201	0.86	2.372	-0.592	-1.336	1	0.095	-0.237	-1.217	-0.245	0.776	0.81	0.249
TCGA-78-8640	4.275	1.191	-2.462	1.294	0.384	-0.536	-0.457	1.112	0.139	2.033	-0.303	-0.422	0.755	-0.071	0.636	-0.823	-1.088	-1.692	-0.815	-0.84	-0.476	2.127	0.402
TCGA-71-8520	4.283	1.782	-3.523	0.181	1.99	0.078	0.708	-0.5	1.321	1.006	1.471	-0.551	-0.465	0.593	0.226	0.941	-1.384	0.37	-0.469	-0.997	-0.576	0.909	1.001
TCGA-55-8620	4.21	1.409	-3.58	1.754	0.897	0.052	0.778	1.068	-0.517	1.282	-1.434	-1.71	1.298	-0.753	-0.17	-1.419	-1.112	-1.774	-1.06	-0.905	-0.661	1.648	-0.393
TCGA-55-8616	4.148	1.509	-2.755	2.255	2.494	-0.521	0.978	0.041	0.514	-0.496	-1.004	-1.242	-0.797	-1.951	-1.377	0.316	0.953	0.657	-0.028	-0.954	0.759	-0.668	0.158
TCGA-55-8512	3.915	1.445	-3.546	0.512	2.42	-1.137	-1.429	1.092	-1.192	1.887	0.847	2.584	-0.892	-1.259	-1.027	0.376	-0.42	-1.055	-1.608	0.313	0.754	2.25	0.973
TCGA-55-8513	4.293	2.248	-0.936	2.405	2.679	0.712	0.858	1.498	0.238	2.401	0.628	1.755	0.403	-0.519	0.115	1.814	-0.105	0.717	0.082	0.839	2.142	0.145	0.054
TCGA-55-8514	4.188	1.742	-3.835	1.034	2.176	0.86	-1.055	0.084	-0.013	1.724	1.048	1.409	0.038	0.292	0.996	1.076	-0.485	0.357	-0.395	-0.822	0.339	-0.696	1.658
TCGA-55-8619	4.6	2.252	-1.396	3.001	2.553	1.766	-0.233	1.85	0.583	2.374	0.362	2.759	1.331	0.162	1.062	2.144	0.16	0.49	0.345	0.563	1.335	0.38	-1.193
TCGA-55-8510	4.422	2.266	-0.801	3.901	3.068	2.582	1.338	2.216	-1.103	3.175	1.293	0.121	3.19	-0.665	-0.424	0.679	0.408	0.216	-0.579	0.07	0.566	-0.698	-1.337
TCGA-55-8507	3.852	2.109	-2.463	-0.228	0.545	-0.498	-0.016	0.654	0.184	1.188	-0.907	2.478	-0.999	-0.47	0.299	1.047	0.738	-1.668	-2.046	-0.428	-0.735	1.374	2.016
TCGA-55-8506	4.583	1.705	-2.421	1.152	-0.754	0.505	0.528	1.529	1.093	3.049	0.437	0.15	1.364	-0.27	0.37	-0.649	-0.335	-0.648	0.678	0.2	0.073	1.026	-0.271
TCGA-55-8621	4.878	3.193	-1.418	2.636	2.588	2.438	1.458	1.971	-1.21	2.773	0.932	-0.197	2.978	0.226	0.828	0.982	0.71	0.366	-1.354	1.437	0.259	0.358	0.11
TCGA-86-8280	4.957	1.928	-0.358	3.714	2.684	2.362	1.718	2.047	-1.417	2.524	0.966	0.772	3.044	-0.8	-0.526	1.091	0.396	1.171	0.218	-0.761	0.79	0.473	-0.97
TCGA-97-8171	3.882	1.577	-4.473	-0.973	-0.242	-0.145	-1.334	-0.238	-0.452	-0.572	-0.745	-0.372	-0.901	-1.915	-1.26	1.062	0.406	-1.277	-1.468	-1.109	-2.364	1.906	1.85
TCGA-69-8254	4.55	2.493	-0.265	2.507	2.189	1.821	0.543	1.186	-0.399	2.455	0.73	0.356	2.057	-1.33	-0.77	1.252	-0.551	0.991	0.117	-1.006	1.607	1.071	0.812
TCGA-69-8255	5.296	0.92	-1.291	2.842	1.188	2.74	1.729	2.142	0.169	2.667	-0.467	0.216	2.996	0.125	0.988	1.136	-0.116	-1.262	-1.99	-0.296	-0.866	0.344	2.328
TCGA-55-8301	5.093	2.397	-0.564	4.221	2.516	3.283	3.186	2.763	1.281	3.54	1.274	-1.227	4.544	-0.008	-0.133	0.846	0.845	0.149	-1.144	-1.162	-0.309	0.252	0.803
TCGA-86-8279	4.726	1.584	-1.972	-0.171	-0.215	0.938	0.252	0.296	0.362	2.005	0.596	0.938	-0.987	-0.259	-0.584	-1.137	-1.31	-0.144	-1.264	0.784	-0.518	0.103	-0.499
TCGA-97-8172	4.384	2.435	2.423	3.199	2.247	1.274	0.061	1.527	-0.776	2.136	0.285	0.301	1.273	-1.575	-0.98	1.899	1.174	0.661	-0.305	0.133	1.211	1.215	-0.832
TCGA-44-2657	4.756	2.218	-0.451	4.622	2.39	2.593	2.354	3.228	1.365	3.223	0.596	0.81	3.851	0.927	1.052	1.204	1.477	-1.559	0.887	-0.827	1.424	-0.34	-0.339
TCGA-71-6725	4.305	1.959	-4.209	-0.905	1.101	-0.954	-0.892	1.097	1.015	1.381	1.384	1.024	-1.516	-1.636	-1.241	-0.829	-0.463	-0.591	-2.665	-0.748	-0.222	1.619	0.102
TCGA-55-6987	5.069	2.882	-0.413	4.227	1.822	3.152	2.27	3.199	0.44	3.652	0.395	2.115	3.7	-0.593	0.084	1.809	1.267	0.368	-0.692	-0.493	0.655	0.776	1.02
TCGA-44-2661	4.714	2.713	0.832	2.197	2.369	1.697	0.535	2.235	0.762	2.928	0.752	-0.401	2.439	0.602	1.281	0.845	-0.868	0.717	-0.697	0.835	0.567	0.383	1.913
TCGA-97-8177	5.063	2.109	1.326	2.855	1.95	0.292	-1.46	2.59	-1.013	3.495	1.432	-0.267	1.441	0.1	0.369	0.992	-0.047	1.218	0.36	0.446	1.432	2.069	-0.948
TCGA-99-8032	4.709	3.257	-1.445	0.864	0.646	-0.864	-0.07	0.506	-0.072	0.899	-0.14	0.648	-1.26	-0.076	0.1	1.866	-0.377	-0.686	-2.143	0.324	-0.571	1.556	1.341
TCGA-99-8028	5.302	2.549	-0.812	4.96	2.716	3.789	2.617	3.484	0.378	3.476	1.765	1.342	4.365	0.924	-0.054	2.206	1.272	-1.32	0.903	-0.587	1.107	2.258	0.031
TCGA-99-8025	4.486	0.637	-2.67	1.939	2.204	-0.184	-1.428	-0.1	0.487	0.286	0.662	2.305	-0.073	-1.091	-1.031	0.223	0.757	-0.877	-2.378	-0.317	0.39	1.115	0.227
TCGA-55-8097	4.462	1.431	-2.754	1.984	2.262	-0.667	0.814	0.211	0.389	0.494	0.834	-0.621	-0.434	-1.886	-1.204	-0.014	0.678	-0.345	0.417	-0.799	-0.151	1.111	-0.636
TCGA-86-8056	4.869	2.618	-1.348	1.704	2.319	0.6	-1.289	0.626	-1.019	1.646	0.992	-1.458	0.476	-2.336	-1.801	0.897	-0.754	0.053	-1.177	0.028	0.105	0.141	-1.341
TCGA-86-8073	5.009	1.884	-3.927	0.108	0.908	-0.356	-1.261	0.194	0.455	1.802	-0.251	-0.565	-0.247	-1.252	-0.969	0.208	1.122	-1.328	-1.781	-0.863	0.151	0.296	-0.605
TCGA-86-6851	5.18	2.433	-0.927	3.648	1.957	2.762	2.807	2.435	1.105	3.226	-0.103	-0.914	3.722	-1.582	-1.669	0.986	0.374	-0.502	-0.223	-1.256	0.537	-0.381	0.835
TCGA-86-8076	4.76	2.406	0.116	3.714	2.353	2.019	0.458	2.581	0.37	2.842	0.214	2.513	2.347	-0.755	-0.112	1.724	0.763	0.466	-0.814	-1.242	1.554	1.195	0.233
TCGA-44-8120	4.378	0.782	-3.415	1.248	2.103	-0.535	0.116	-0.094	1.053	-0.809	-0.238	0.767	-1.169	-0.757	-0.175	0.141	0.432	0.206	-0.867	-0.126	-0.076	1.896	0.023
TCGA-55-7284	4.417	2.234	-0.251	1.037	1.921	1.422	-0.129	0.902	0.549	1.623	0.479	0.93	1.181	0.984	-0.706	2.026	0.012	0.002	-0.885	-0.325	1.461	-0.228	1.557
TCGA-44-8119	5.106	0.834	-2.646	1.703	-0.582	0.923	0.578	1.875	-0.051	2.339	-0.841	0.436	1.427	0.457	-1.448	2.106	-0.497	-2.243	-3.06	-0.887	-0.758	1.667	-0.017
TCGA-55-8206	4.193	3.061	-0.39	0.379	2.152	-1.131	-0.214	0.533	1.29	1.416	0.309	-0.732	-1.073	-1.173	-0.439	0.455	0.356	-0.143	-1.231	0.004	1.392	1.033	0.876
TCGA-95-8039	4.404	2.67	1.26	2.115	2.824	1.805	-0.38	0.706	0.518	1.187	0.9	-0.609	1.031	-1.216	-0.885	1.454	-0.771	-0.158	-1.047	-0.436	0.224	1.091	-0.495
TCGA-55-8096	4.385	2.768	-1.977	0.103	1.443	1.066	1.183	0.065	-0.024	2.292	1.433	0.608	0.879	-0.449	-0.041	1.28	0.148	-0.775	-0.907	-1.16	0.89	0.552	0.204
TCGA-05-4389	4.424	1.589	-0.956	2.545	1.443	1.964	1.357	1.79	-0.154	2.52	-0.531	0.186	2.332	1.122	1.083	0.565	-0.451	-0.167	-1.499	-0.521	1.046	1.256	-0.183
TCGA-55-6983	4.332	1.955	1.152	3.088	2.354	0.787	-1.178	1.62	0.469	1.495	0.322	0.671	0.574	-0.274	0.324	1.891	1.182	0.428	-1.094	0.176	1.463	1.272	2.561
TCGA-44-2655	4.392	2.922	-2.737	1.043	2.058	-0.707	0.251	1.519	-0.378	2.288	1.227	-0.058	0.412	0.19	1.043	-0.035	-0.055	-0.782	-1.793	0.005	0.477	0	1.507
TCGA-05-4382	4.98	3.022	0.919	2.573	1.048	2.36	1.289	2.374	0.063	3.337	0.769	1.815	2.681	0.72	0.695	2.147	-0.31	-1.501	-1.95	-0.871	1.026	-0.213	0.666
TCGA-05-4384	4.357	1.913	-4.049	0.47	0.847	-0.844	0.358	1.522	1.122	1.992	-0.291	-1.418	-0.202	-1.611	-0.966	0.58	0.509	-0.794	-2.334	-0.217	1.023	1.22	-0.911
TCGA-55-8091	5.11	2.997	-0.056	2.076	2.161	2.536	1.293	0.677	-0.045	1.644	1.354	0.842	2.216	0.084	-0.639	1.773	-1.147	-0.915	-1.818	-0.662	0.989	0.462	1.049
TCGA-55-8208	5.04	3.236	-1.767	4.548	2.374	3.679	2.344	3.414	0.579	3.441	1.342	1.855	4.053	-0.879	-1.182	2.33	1.148	0.092	-0.974	-1.267	0.525	2.37	-0.521
TCGA-55-8085	4.748	2.157	-0.755	3.502	1.969	2.734	1.637	2.24	0.422	2.668	0.878	1.768	3.035	-1.064	-0.643	1.685	0.318	1.242	-0.486	1.264	-0.043	0.555	-0.189
TCGA-55-8207	4.444	2.361	-4.32	1.56	2.765	-0.328	0.245	0.928	0.757	1.688	1.474	0.486	0.288	0.356	0.876	0.874	0.986	-0.728	0.675	0.185	0.838	0.577	1.285
TCGA-55-8087	3.92	1.014	-4.891	0.22	0.039	-0.133	-1.26	1.06	0.565	0.216	-1.217	-1.296	-0.803	-2.085	-1.454	1.214	0.346	-0.198	-1.299	-0.382	0.258	3.283	-0.778
TCGA-62-8402	4.632	2.901	-0.882	3.257	2.944	3.991	2.678	2.485	0.369	2.974	1.325	0.563	4.244	0.716	-0.632	0.832	0.726	-0.494	-1.22	0.807	-0.318	0.995	0.844
TCGA-91-A4BC	4.634	1.281	-0.681	3.512	0.344	2.174	1.977	3.042	1.264	3.358	-0.898	0.097	3.306	0.776	1.231	1.064	0.923	-1.548	-2.374	0.962	0.196	0.5	1.868
TCGA-55-A491	4.933	1.985	-0.525	3.1	2.536	1.384	0.922	1.656	-0.116	2.984	1.403	-1.532	2.588	-0.176	-0.933	-0.386	0.172	-0.6	-0.31	-0.873	0.873	-1.503	-0.011
TCGA-53-7626	5.016	3.008	-1.253	4.538	3.065	2.329	0.969	3.174	-1.176	3.66	1.292	2.296	3.399	-0.938	-0.744	1.313	0.876	-0.241	-1.159	-0.024	1.033	0.56	-1
TCGA-97-7941	4.009	1.354	-0.395	1.881	3.04	0.282	1.207	0.496	1.149	1.204	0.807	-0.214	0.279	-1.398	-0.629	0.211	-0.486	-0.17	-1.368	1.281	1.401	1.962	-0.214
TCGA-93-7347	4.611	3.131	-0.511	4.138	3.133	3.014	1.983	2.417	-0.862	2.448	0.924	-0.485	3.142	-0.391	-0.463	1.305	0.81	0.17	-0.866	-0.135	1.766	1.581	-0.659
TCGA-55-7576	4.331	1.982	-2.41	1.907	2.649	0.875	-0.407	0.211	1.078	1.358	0.819	-0.815	0.801	-0.448	0.091	0.041	-0.236	1.081	-0.131	-1.057	1.13	0.452	1.488
TCGA-78-7162	4.709	1.682	1.561	2.962	2.492	1.072	0.174	1.515	1.344	1.893	0.549	-1.737	1.57	-1.411	-0.979	0.906	0.27	1.226	-0.075	-0.958	-0.154	1.432	0.114
TCGA-86-7954	4.861	2.548	0.473	3.094	2.302	3.071	2.772	1.444	1.353	2.814	0.462	-0.615	3.25	-0.623	-0.333	0.197	0.346	0.212	-0.857	-0.371	0.578	0.702	1.001
TCGA-64-1681	4.415	2.244	0.885	2.254	2.998	2.042	0.325	0.353	0.347	1.683	1.245	-0.233	1.047	-1.376	-0.863	1.352	0.004	-1.372	-0.25	-0.28	0.828	1.456	0.248
TCGA-55-7728	4.111	2.825	-0.594	3.708	2.828	2.354	0.447	2.461	0.118	3.544	1.453	-0.696	2.625	-0.396	0.515	1.11	0.844	-0.57	-1.39	0.025	2.881	1.162	1.494
TCGA-55-7995	4.505	2.188	-1.914	3.114	1.554	2.156	2.251	2.258	0.483	3.309	-0.257	-1.999	3.088	-1.367	-1.147	0.076	0.045	-1.106	-2.229	-1.3	1.049	-0.776	0.022
TCGA-55-7725	4.468	3.55	-1.708	3.15	2.788	2.377	1.284	1.111	-1.088	1.826	1.154	-0.171	2.503	-1.359	-0.779	0.723	0.54	0.728	0.534	0.552	0.537	-0.775	1.999
TCGA-55-7727	4.361	2.643	-1.353	1.999	1.846	1.735	0.26	0.134	0.486	0.877	0.177	0.367	0.734	-1.262	-0.761	1.665	0.361	-0.283	-0.347	-0.406	-0.031	0.122	-0.835
TCGA-55-7815	4.12	2.266	-0.119	1.194	-0.153	1.261	0.107	0.957	1.072	2.19	-0.076	0.252	0.545	-0.248	0.154	2.085	-0.402	1.334	0.605	0.292	0.077	0.573	2.223
TCGA-53-7813	3.963	1.908	-0.203	1.006	-0.474	0.28	-0.705	0.751	-0.068	1.602	-0.67	2.639	0.344	-0.37	-0.13	0.517	0.288	-1.132	-2.182	-1.379	-0.99	0.833	1.168
TCGA-69-7764	4.011	1.536	-0.968	1.471	1.271	0.403	-0.11	0.689	1.296	0.279	0.599	-1.303	0.59	-2.217	-1.115	0.256	-0.928	-0.663	-1.266	-0.375	-0.474	1.11	-0.081
TCGA-86-7714	3.719	3.341	-3.765	-0.221	2.95	0.068	-0.542	-1.151	1.104	-0.292	0.141	1.09	0.561	-1.95	-1.149	1.908	-0.675	0.091	0.738	-0.506	1.117	1.726	-0.603
TCGA-97-7937	4.57	1.419	-2.826	-1.274	0.693	-0.956	0.632	0.946	0.033	1.14	0.999	-0.723	-1.018	-0.016	0.407	-0.594	-1.309	-1.41	-2.339	-0.176	-0.3	-0.476	1.236
TCGA-38-4626	4.501	3.14	-0.617	1.726	1.745	0.615	0.509	2.659	-0.428	4.068	1.413	3.677	1.588	-0.655	-0.15	1.324	0.338	1.147	-0.275	0.334	1.735	-0.361	-0.937
TCGA-69-7765	4.759	1.824	-2.528	2.536	2.659	1.811	-0.132	0.978	0.466	2.035	0.987	-0.135	1.238	-0.639	-1.351	2.288	0.06	0.054	0.059	0.593	0.504	1.085	1.778
TCGA-44-7659	3.937	1.373	-2.65	1.827	2.943	0.357	0.908	0.382	-0.917	1.241	0.948	-0.459	0.171	-0.399	0.139	0.46	-0.67	-1.269	0.281	-1.134	0.251	1.732	-0.153
TCGA-91-7771	4.541	2.326	-0.911	3.052	2.575	2.631	1.379	1.785	-0.125	2.328	0.529	-1.499	2.572	0.515	1.088	1.955	-0.001	-0.86	-1.723	-0.553	0.337	0.308	1.986
TCGA-69-7761	4.766	3.198	-0.948	3.224	2.771	4.261	2.776	1.691	0.538	2.294	1.022	2.46	3.749	-1.417	-0.751	1.367	-0.114	0.132	0.66	0.14	1.082	0.085	-0.837
TCGA-55-7910	3.995	0.843	-0.521	-0.423	-0.917	-0.746	0.546	-0.58	0.106	0.852	-0.712	2.748	1.038	-0.779	-0.273	1.491	0.149	-0.837	-1.604	-0.752	-1.358	2.531	1.367
TCGA-55-7907	4.649	1.312	0.326	3.545	2.383	2.521	2.43	1.962	0.223	2.277	0.555	0.99	3.301	-0.047	-0.417	0.308	0.439	-0.694	-0.859	-0.028	0.703	0.005	-0.391
TCGA-97-7938	4.334	1.254	-3.24	2.057	2.348	0.43	1.015	0.634	-0.625	1.659	0.999	2.298	0.343	-1.95	-1.319	1.201	-0.326	-0.526	-1.532	-0.241	0.259	0.528	1.183
TCGA-78-7167	4.028	0.699	-2.255	-0.314	0.762	-1.125	0.61	-0.773	0.589	-0.794	1.096	0.628	0.854	-2.085	-1.507	-1.331	-0.605	-1.105	-2.544	-1.268	0.1	3.192	0.15
TCGA-78-7163	3.964	1.689	-2.291	-0.453	1.143	-0.92	-0.139	1.172	0.714	0.702	0.926	0.307	-0.68	-2.269	-1.462	0.924	-0.633	-0.238	-1.297	-0.887	0.868	-0.087	0.981
TCGA-78-7535	3.944	2.283	-2.489	0.247	-0.098	-0.973	-1.173	1.16	0.187	2.645	0.086	0.592	-0.751	-0.421	0.384	0.734	-0.814	-1.484	-2.398	0.201	0.993	1.769	1.184
TCGA-78-7539	4.562	2.42	-0.859	3.321	2.997	3.161	1.862	1.374	-0.175	2.727	0.974	-0.365	3.324	-1.207	-0.968	1.085	0.384	-1.444	0.533	-0.453	1.879	0.557	-0.61
TCGA-78-7537	4.156	0.868	-0.894	-0.105	0.612	-1.42	-0.35	0.485	1.388	0.999	-0.794	-0.164	0.836	-1.723	-0.386	-0.251	-1.434	1.251	-0.225	-0.868	0.144	1.615	0.294
TCGA-78-7540	3.842	2.654	-4.293	0.513	0.837	-0.438	0.14	0.431	-0.577	1.073	-0.401	0.264	-0.72	-0.943	0.224	0.184	-0.518	0.303	-0.856	-0.543	1.667	0.321	-0.41
TCGA-78-7633	4.522	1.665	-3.675	0.802	0.322	1.184	-0.714	-1.059	0.627	-0.554	-0.484	-0.521	0.178	-2.115	-1.338	-0.88	0.153	-0.087	-1.82	-0.432	-1.088	3.429	-0.154
TCGA-73-7498	4.232	1.784	-1.156	1.286	2.129	-0.677	1.075	-0.048	0.023	-0.476	-0.918	-1.77	-0.973	-1.225	-0.243	0.068	-0.119	0.37	-1.06	-0.578	-0.049	0.968	-0.367
TCGA-55-7283	4.626	1.897	-2.827	1.516	2.274	1.056	-0.074	1.231	0.267	2.003	0.975	0.939	1.692	-0.69	-0.323	-0.329	0.595	0.37	-0.878	-0.386	0.618	1.397	2.659
TCGA-97-7547	4.6	2.121	-4.574	1.613	2.7	-0.282	0.994	-0.149	0.403	0.088	0.796	-1.186	-0.562	-0.844	-0.157	-0.182	-0.333	-0.492	-1.564	-1.019	2.119	-1.975	-0.132
TCGA-78-7156	4.349	2.063	-2.546	-0.906	0.781	-0.033	-0.515	-1.181	0.446	-0.29	-0.766	-1.406	-0.382	-1.967	-1.683	-0.699	0.279	-1.414	-3.004	-1.109	-0.769	1.132	0.775
TCGA-55-7281	4.456	2.68	0.202	3.568	2.463	3.095	1.983	2.046	0.409	3.332	0.902	0.665	3.409	-0.204	-0.018	1.92	0.503	0.047	-1.459	-0.144	1.427	0.914	1.788
TCGA-55-6642	4.751	2.424	0.267	1.171	0.258	0.843	0.021	1.581	-0.767	2.125	-0.608	0.603	1.092	0.68	0.319	1.344	0.943	-1.498	-2.522	-1.516	-0.423	0.557	0.015
TCGA-49-4501	4.706	1.571	-0.62	3.124	2.613	0.503	-0.517	1.896	1.091	2.075	0.874	-0.616	1.262	-0.712	-0.37	0.644	0.659	1.221	0.723	0.136	1.733	1.961	0.987
TCGA-05-4405	4.973	2.037	-4.134	0.117	1.925	-0.386	0.505	-0.329	0.085	1.478	1.126	-0.292	-0.592	0.638	-0.524	0.264	1.292	-0.543	-0.223	-0.43	0.734	-0.441	0.256
TCGA-44-6774	4.854	2.606	-1.543	1.721	2.081	1.107	-0.638	1.276	-0.698	2.474	1.11	2.219	0.999	-0.307	-0.499	1.742	-1.422	-0.626	-1.531	-0.368	0.775	1.012	0.367
TCGA-50-5055	4.751	2.999	0.24	5.103	2.851	3.423	1.966	3.495	1.325	3.152	1.065	1.092	3.481	-0.385	-0.954	2.959	1.807	0.116	-1.033	1.172	1.435	3	-2.072
TCGA-75-6206	4.533	1.682	-3.974	-0.262	0.705	-1.336	0.465	-0.497	-0.049	0.604	-0.284	-0.412	-1.314	-0.42	0.301	-0.633	-0.859	0.192	-1.308	-0.363	0.441	0.604	-1.068
TCGA-75-6212	4.181	3.111	0.312	2.072	2.717	0.052	0.875	0.341	-1.127	0.336	-0.164	1.179	-0.115	-0.868	-0.142	1.063	0.766	0.426	-0.687	-0.185	0.162	1.149	-2.492
TCGA-50-5068	4.525	2.823	-0.083	3.27	1.002	2.141	1.994	2.624	0.661	3.512	-0.177	2.05	2.865	-0.01	-0.212	2.088	0.463	0.586	0.513	-0.945	0.92	1.033	-1.344
TCGA-78-7153	4.203	0.926	-1.351	-0.054	0.965	-0.243	0.794	-0.184	-1.518	0.551	-0.307	-0.761	-0.607	-1.486	-0.798	-0.606	-1.069	-1.006	-2.429	-1.782	-0.714	2.124	0.801
TCGA-97-7546	4.686	2.305	-1.593	3.166	2.904	1.003	-0.996	1.972	-0.792	2.827	1.242	0.438	1.341	-0.855	-0.88	1.522	0.135	-1.416	0.123	-0.332	-0.022	1.079	1.322
TCGA-78-7155	4.514	1.893	-2.804	-0.631	0.422	-1.219	0.108	-0.294	-1.886	1.011	-1.297	-0.985	0.513	-1.663	-0.621	-0.075	0.697	-1.926	-2.571	-0.768	-2.287	0.457	1.958
TCGA-93-7348	4.316	1.778	-0.907	2.313	2.046	0.78	-0.819	0.989	0.396	2.095	0.204	2.918	0.478	0.318	-0.865	2.297	0.573	0.034	-0.213	-0.358	0.495	1.282	0.339
TCGA-50-7109	4.869	0.645	-1.058	2.278	1.129	1.662	0.664	1.813	0.251	2.453	-0.412	0.653	1.824	0.184	0.419	1.624	-0.365	-1.307	-2.757	-0.671	-0.688	0.286	-0.276
TCGA-55-7573	4.603	3.232	-1.411	3.518	2.989	1.189	0.324	1.701	1.269	2.525	1.121	-1.425	1.851	-1.567	-1.733	0.891	0.809	0.223	-0.419	-0.967	1.186	0.947	0.922
TCGA-97-7554	4.894	1.799	-0.373	2.05	2.67	1.651	-0.008	0.825	-0.915	1.523	1.565	-1.082	1.375	0.045	-0.361	1.476	-0.78	-0.621	-0.589	-0.459	0.223	0.026	0.87
TCGA-78-7143	4.32	2.089	-2.178	0.804	2.275	0.544	0.805	0.13	0.354	1.216	1.114	-1.372	-0.416	-1.803	-1.317	0.897	-1.324	-0.89	0.875	-0.984	-0.139	1.456	-0.526
TCGA-55-7227	4.796	2.375	1.053	3.682	3.166	2.763	1.018	2.225	0.329	2.808	1.876	-1.139	2.701	-1.021	-0.813	1.577	0.022	-1.09	0.159	-0.771	0.4	0.337	1.532
TCGA-78-7149	4.363	1.539	-0.849	0.765	1.614	-0.09	0.795	0.231	-0.583	0.472	-0.316	1.231	-0.643	-1.693	-1.253	0.672	-0.715	-0.329	-1.996	0.241	-0.744	1.844	-0.288
TCGA-55-6972	5.053	2.644	0.741	1.581	1.837	2.013	0.198	2.209	-1.218	2.961	1.522	1.756	2.376	-1.728	-1.182	1.4	-0.752	-0.246	-1.597	-1.461	0.563	-0.025	0.797
TCGA-78-7158	4.494	1.824	-4.022	0.495	0.776	-1.258	0.362	0.595	-0.165	-0.766	-0.574	-0.731	0.856	0.331	1.226	0.996	-0.237	-0.04	-0.046	-0.857	-1.604	1.225	0.914
TCGA-97-7552	4.514	3.604	-0.851	4.312	3.165	3.793	2.418	2.838	0.594	3.371	1.043	0.033	3.902	-0.057	0.594	2.353	0.885	-0.824	-0.418	-0.67	1.582	0.645	0.146
TCGA-97-7553	4.845	3.707	0.887	3.551	2.742	2.507	0.671	2.796	0.038	3.518	1.409	3.22	2.67	0.474	1	1.969	0.177	-0.281	-1.237	0.016	0.286	-0.624	-0.876
TCGA-78-7159	4.583	0.679	-0.912	1.427	0.555	0.081	-1.091	1.62	0.242	2.222	0.07	2.6	0.381	-0.513	-0.002	1.597	-0.961	-0.327	-2.007	-0.402	-0.579	0.842	-0.708
TCGA-55-6971	4.951	2.653	-1.042	3.718	2.276	2.809	1.177	2.795	0.876	3.123	0.439	1.02	2.534	-0.025	-0.313	2.127	0.425	-1.015	-1.573	0.819	0.387	0.739	0.253
TCGA-91-6849	4.481	2.451	-1.048	1.88	1.503	0.571	-1.106	1.122	0.229	1.189	-0.309	1.126	-0.148	-0.782	-0.544	1.682	0.381	0.329	0.907	-0.649	1.724	1.818	1.789
TCGA-78-7152	4.347	1.676	-1.223	2.684	2.234	0.967	-0.418	1.505	-0.401	1.821	-0.328	1.19	0.838	-1.373	-0.937	1.038	0.834	-1.01	-2.015	-1.264	0.355	1.96	0.168
TCGA-38-7271	4.75	2.987	-0.293	4.5	2.645	2.192	1.214	3.061	-0.243	2.789	0.747	0.198	2.515	0.812	0.929	2.306	1.693	-1.285	1.114	-0.578	1.244	0.477	-0.437
TCGA-91-6840	4.6	1.232	0.762	2.637	2.139	1.431	0.902	1.144	0.794	1.778	0.017	-0.724	1.716	-2.172	-1.528	-0.473	0.402	-0.952	-1.531	0.094	-1.367	0.107	2.243
TCGA-99-7458	4.648	3.147	-0.89	3.073	2.841	3.108	1.167	1.744	0.443	2.445	1.01	-1.34	2.562	-0.898	-0.806	1.969	-0.662	-0.127	-0.936	-0.297	0.61	-0.067	2.116
TCGA-78-7161	3.795	2.317	-1.319	0.865	-0.658	-0.865	-0.207	-1.236	0.036	-0.267	-1.026	0.404	0.498	-1.794	-1.028	0.375	0.965	-1.863	-2.604	-0.042	-1.353	3.85	-0.465
TCGA-44-5645	4.285	2.723	-0.382	2.616	2.569	1.059	-0.304	1.093	-0.251	1.779	0.532	-1.176	0.358	-1.715	-1.284	1.878	0.828	-0.413	-1.243	-0.216	1.154	1.446	0.95
TCGA-50-6593	4.016	2.022	-3.526	0.865	2.608	0.527	0.522	-0.714	-0.013	0.475	0.933	1.039	-0.874	-0.254	-0.073	1.185	-0.286	-0.718	0.659	-0.078	0.824	0.672	0.201
TCGA-67-6216	4.177	2.538	-0.16	1.805	2.6	0.292	0.987	-0.028	-0.985	1.33	1.077	-1.475	-0.054	-0.878	-0.632	0.75	0.788	0.385	-0.443	-0.831	1.056	0.823	1.58
TCGA-50-6592	5.193	3.342	1.259	3.016	1.237	1.118	1.294	2.57	-0.059	3.255	0.607	0.819	2.587	1.317	-1.503	0.042	0.125	-0.527	-1.109	0.972	-0.248	1.256	0.621
TCGA-50-5944	4.034	1.742	-3.944	-0.911	1.625	-0.921	0.416	-1.103	-0.42	0.146	0.671	0.485	-1.188	-0.67	-0.091	-1.062	-0.165	-0.686	-1.339	-0.606	1.161	0.337	0.015
TCGA-55-6543	4.715	2.723	-3.573	0.962	1.803	0.898	-1.148	1.009	1.32	2.603	2.584	2.462	1.16	-1.21	-0.707	-0.034	0.166	-0.985	-1.853	0.722	1.138	0.508	0.557
TCGA-05-4430	4.744	1.838	0.052	2.552	2.876	1.974	0.386	1.544	-0.758	2.134	1.792	1.613	1.965	-1.433	1.243	1.447	-0.999	-0.967	0.114	-1.356	0.054	-0.03	1.602
TCGA-05-4432	4.36	2.082	-0.978	2.342	1.251	1.433	0.115	1.948	0.324	2.122	-0.614	1.228	1.463	0.575	-1.525	1.603	-0.454	-1.345	-1.918	-0.241	-0.194	1.421	-0.735
TCGA-05-5420	4.845	2.017	-0.069	3.619	1.423	3.174	2.503	3.127	0.548	3.252	-0.361	-0.273	3.504	0.437	0.658	2.107	0.292	-0.346	-1.137	0.455	1.201	2.667	0.596
TCGA-05-5423	4.626	1.979	-1.115	1.859	2.405	0.407	-0.814	1.69	1.108	2.704	1.392	1.125	1.577	0.742	-1.384	0.291	-1.197	-0.122	-0.648	-1.259	1.579	0.406	0.812
TCGA-44-6148	3.794	1.755	-3.378	0.801	2.289	-1.15	-1.152	0.005	1.138	1.123	0.982	-0.969	1.211	-1.401	-1.187	1.331	-0.25	-0.66	-1.605	-0.048	2.206	-0.402	0.027
TCGA-67-3770	4.55	1.335	-0.558	0.926	1.815	1.174	0.161	0.673	-1.077	1.063	0.392	1.081	1.212	-0.375	0.494	0.678	0.328	1.174	-1.224	-0.666	0.61	0.684	-1.137
TCGA-50-5049	4.902	3.049	-0.402	4.164	2.392	3.322	2.911	3.196	-1.401	3.805	0.779	-1.255	4.064	0.157	0.291	1.608	0.545	0.358	-0.148	-1.293	1.418	2.331	-0.636
TCGA-05-4403	4.213	2.548	-0.53	2.04	2.006	1.623	0.452	1.809	-1.172	2.65	1.243	0.022	2.124	0.166	1.206	0.853	1.183	-0.216	-0.886	-0.924	1.987	0.952	0.793
TCGA-44-6146	3.872	2.257	-3.744	0.454	0.682	-0.722	0.436	1.09	-1.031	-1.254	-1.095	0.832	0.595	-1.688	-1.055	0.427	-0.6	-1.369	-0.943	-0.371	0.783	-0.104	-1.113
TCGA-44-2659	4.281	1.942	-1.106	2.609	2.203	1.87	1.314	1.099	0.413	1.926	1.081	-1.85	2.49	-0.387	-0.513	0.474	-0.348	0.12	-0.464	-0.91	-0.594	1.183	1.436
TCGA-44-2656	4.423	3.396	-1.474	3.924	2.404	2.807	1.868	2.265	-0.941	2.751	0.67	-1.317	3.285	-0.403	-0.141	1.309	1.668	-0.579	-0.64	-0.153	0.593	1.752	-0.116
TCGA-49-4510	4.263	0.803	-1.61	0.255	1.085	0.408	0.617	-0.081	-0.311	0.26	0.266	1.107	-0.621	-1.42	-0.633	0.984	-0.785	0.461	-0.666	-1.28	-0.641	1.533	-0.731
TCGA-73-4658	4.63	2.22	-1.475	3.356	2.416	1.957	0.054	2.551	0.264	3.499	1.166	0.866	2.388	0.108	0.607	2.208	-0.028	-0.759	-0.969	-0.398	0.6	0.201	0.49
TCGA-91-6829	4.376	1.658	-5.362	-1.49	-0.021	1.17	0.086	-0.19	-0.524	1.02	0.484	-0.309	-1.442	-0.066	-0.542	0.035	-0.65	-2.027	-1.591	0.77	-0.57	1.317	0.389
TCGA-67-3772	4.334	1.833	1.626	2.208	2.413	0.91	-0.755	1.041	-0.103	1.335	0.748	0.484	0.652	1.158	0.559	1.997	0.039	-0.04	-1.271	0.075	0.603	0.885	0.818
TCGA-73-4662	4.542	2.208	2.188	3.361	2.93	1.354	-0.493	2.079	-0.559	1.983	0.398	0.86	1.669	-0.826	-0.338	1.485	0.342	-0.091	-1.451	-0.445	0.663	1.096	1.673
TCGA-73-4668	4.648	0.929	-2.328	0.805	1.661	0.29	0.771	-0.509	-0.297	-0.555	-0.14	-1.002	-0.942	-0.767	-0.318	0.936	-0.325	-0.247	-0.541	0.896	-0.938	1.481	0.929
TCGA-49-4514	4.458	1.812	0.329	3.275	2.236	2.61	1.479	1.747	0.164	1.897	0.5	0.445	2.621	-0.36	-0.615	1.249	1.095	-0.505	0.429	1.405	1.368	1.68	0.507
TCGA-67-4679	4.34	2.358	-3.688	0.62	2.833	0.099	0.649	-0.039	-1.036	1.523	0.941	1.167	-0.139	-1.603	-1.148	1.242	0.472	1.034	-0.448	-0.45	0.5	0.587	1.472
TCGA-67-6217	4.524	2.577	1.943	2.644	2.464	0.902	0.274	1.237	1.115	1.478	0.524	1.127	1.287	-1.584	-1.212	0.684	-0.414	-1.225	1.049	-0.638	1.172	0.997	1.889
TCGA-91-6828	4.562	3.313	-3.565	0.47	1.429	1.045	-1.088	1.109	-0.657	2.707	1.124	2.46	1.138	-0.639	0.118	1.517	-1.151	-0.172	-1.641	-0.249	0.309	1.88	-0.712
TCGA-50-6597	4.319	2.233	0.193	3.669	2.514	2.167	1.578	1.488	-1.034	1.708	0.616	-1.608	2.093	-0.876	-1.256	0.868	1.835	-1.204	0.311	-1.165	1.927	0.954	1.112
TCGA-44-6778	5.51	2.882	-1.882	4.414	2.457	2.735	2.03	3.517	-1.109	3.608	0.393	1.215	3.816	-0.309	0.314	1.541	0.268	-1.077	-1.611	0.287	0.193	-0.267	-0.423
TCGA-75-5146	4.174	2.628	0.207	2.333	2.096	0.53	-0.807	1.368	-0.611	1.702	-0.076	-0.929	0.556	-1.414	-1.105	1.601	0.675	-0.079	-0.894	-0.581	0.562	0.972	0.38
TCGA-49-4512	4.425	2.103	-3.169	1.879	2.101	-0.855	0.259	0.382	0.91	1.908	0.968	0.851	-0.095	0.165	-0.241	0.504	1.01	-0.843	0.281	-0.808	1.862	2.544	-0.446
TCGA-49-4487	5.161	2.134	-0.103	4.186	1.699	2.496	1.679	3.276	0.653	2.767	-0.111	1.024	2.666	-0.265	-0.103	2.117	1.227	1.089	-0.074	-1.441	0.082	1.303	0.507
TCGA-05-4424	4.632	2.75	-3.761	1.341	1.161	1.23	0.001	1.369	-0.439	2.345	-0.427	-0.089	0.876	-1.467	-0.845	1.487	1.26	-0.28	-1.607	0.192	0.709	0.397	0.289
TCGA-44-6775	4.525	2.822	0.226	0.756	1.896	1.309	-0.667	0.486	0.023	2.391	1.053	1.614	0.898	-1.455	0.977	1.854	0.525	0.212	-0.814	-0.013	0.402	-0.607	-0.855
TCGA-44-6776	3.976	1.41	-2.226	-0.058	1.292	-1.439	-0.17	0.174	0.753	-0.005	-1.141	0.709	-1.394	-1.903	-1.079	-0.521	1.09	0.986	-0.64	0.09	0.225	0.745	0.477
TCGA-64-5778	4.758	2.062	-0.973	4.228	2.344	3.113	2.763	2.879	-1.227	2.576	0.711	-0.24	3.926	-1.005	-0.821	0.975	0.858	0.559	-0.232	-1.381	1.567	1.915	0.622
TCGA-44-6777	5.041	3.773	-1.413	3.278	2.517	2.581	0.636	2.276	0.718	3.46	1.159	-0.296	2.54	0.634	0.78	2.653	0.081	-0.285	-0.357	0.227	0.689	1.196	0.201
TCGA-50-5051	3.943	2.751	-2.212	-0.224	-0.86	-0.03	-1.907	-0.277	-0.268	0.828	-1.055	0.437	0.03	-0.883	-0.539	0.405	0.587	0.904	-0.649	0.049	-0.896	1.252	1.1
TCGA-64-1676	4.824	2.696	-1.259	2.918	1.048	1.906	1.954	2.196	0.973	3.15	1.67	2.194	3.202	0.356	0.673	0.289	-0.107	1.168	-0.31	-0.994	1.164	-0.667	-0.328
TCGA-91-6835	4.552	3.099	-0.865	4.146	2.347	2.286	1.847	3.14	-1.506	3.23	0.256	0.222	3.028	-0.416	0.35	1.34	0.82	0.573	-0.349	-0.83	1.086	0.708	-1.062
TCGA-55-1592	4.526	2.413	-4.236	0.856	1.195	0.261	-0.828	1.089	-1.071	2.536	0.764	0.827	0.447	-1.369	-1.492	0.669	0.736	-1.123	-1.474	0.248	0.283	-0.047	-0.536
TCGA-05-4417	4.859	1.594	1.769	3.411	2.035	2.452	1.308	2.31	0.467	2.557	0.264	0.525	2.373	-0.911	-1.53	2.254	0.365	0.096	-0.99	-1.42	0.839	0.933	-0.298
TCGA-05-4427	4.491	1.55	-0.94	1.757	1.715	1.631	0.084	1.381	-0.333	2.17	0.886	0.549	1.734	0.198	0.558	1.008	1.262	0.495	-0.548	-0.601	0.307	0.379	1.63
TCGA-55-1594	4.579	1.85	-2.61	1.922	0.937	-0.159	0.139	1.018	-0.156	1.319	-0.021	-0.958	1.097	-1.019	-0.723	-1.061	-0.456	-1.461	-2.164	-0.59	-0.804	0.635	1.863
TCGA-49-4505	4.705	1.981	1.191	3.803	3.099	3.271	1.905	2.075	0.033	2.538	1.517	0.892	3.345	-0.193	0.012	1.42	0.405	-0.553	1.001	0.171	1.488	0.108	-0.3
TCGA-44-6147	5.033	2.691	-2.326	1.105	1.726	1.003	-1.372	1.937	-0.409	3.09	1.552	2.31	1.3	-0.823	-0.771	1.504	-0.496	0.997	-0.272	0.812	-0.146	-1.861	-0.224
TCGA-50-5935	4.414	2.927	-1.245	1.48	3.11	1.403	0.276	0.875	0.404	1.369	0.675	-1.217	1.515	1.167	-0.858	0.469	-0.874	0.64	-0.913	0.75	0.537	-0.097	0.54
TCGA-55-6969	4.11	3.249	0.247	2.183	2.152	-0.024	0.371	2.258	1.391	2.809	0.83	2.057	0.667	0.474	1.139	1.217	-0.391	-0.381	-1.129	-0.209	0.925	1.412	1.691
TCGA-05-5715	4.352	2.41	-3.999	0.082	1.277	-1.537	-0.602	0.579	0.182	1.542	0.586	-0.601	-1.047	-0.811	-0.333	-0.941	0.862	0.22	-1.078	-0.962	1.161	1.327	-1.984
TCGA-05-4422	4.553	2.868	-1.075	1.457	1.02	2.423	1.368	0.988	0.364	1.85	1.164	-1.354	2.074	-2.002	-1.218	1.502	-0.406	-0.929	-1.642	-1.338	1.299	0.99	0.047
TCGA-05-5428	4.454	1.715	-2.438	0.379	1.008	0.423	-0.303	0.182	-1.244	1.818	0.846	1.532	0.777	0.546	0.272	0.796	1.251	-0.417	0.256	-1.286	-0.169	0.089	0.25
TCGA-50-5942	4.034	2.8	-3.258	0.72	2.5	-0.46	0.834	-0.228	-0.137	0.596	0.804	0.628	-0.274	-2.339	-1.54	-0.343	1.163	-0.598	-1.237	-1.571	0.771	1.389	-0.554
TCGA-05-4426	4.549	2.539	-3.046	-0.314	1.117	0.098	0.12	0.045	-0.111	1.982	2.17	0.965	-0.288	-1.342	-0.601	0.551	-0.137	-0.452	-0.407	0.906	-0.201	0.913	0.471
TCGA-05-4433	4.576	2.623	-0.069	2.067	2.341	2.352	1.429	1.614	-0.782	2.804	0.458	0.245	2.817	-0.623	0.316	0.881	0.931	-0.166	-0.187	-0.559	1.772	1.34	1.411
TCGA-67-3773	4.426	3.395	-1.591	3.001	2.608	2.527	1.538	1.808	-0.575	2.599	0.972	0.063	3.277	-1.121	-0.849	1.027	-0.797	0.782	0.772	0.306	0.437	0.569	1.382
TCGA-64-5779	4.721	0.837	0.988	1.992	1.722	0.993	-0.263	0.706	0.155	1.009	-0.094	0.107	0.61	-0.22	0.332	1.952	-0.081	-0.882	-1.624	-0.463	-0.604	1.12	2.117
TCGA-44-2666	4.059	1.299	-4.265	-0.51	1.349	-1.195	-0.937	-0.026	1.122	0.634	0.968	-0.674	-1.124	-2.159	-1.461	-0.386	0.088	-0.734	-1.89	-0.036	0.684	1.61	-0.392
TCGA-49-4488	4.704	2.145	-2.321	3.313	2.937	2.694	1.128	1.692	0.662	2.179	0.998	-0.575	2.744	-0.247	-0.269	1.246	-0.017	-0.545	0.96	-0.462	0.89	1.786	1.288
TCGA-44-3918	4.884	2.984	-0.818	4.097	1.958	3.261	2.607	3.011	-0.294	4.009	1.262	0.083	4.145	1.23	0.488	1.973	0.461	-0.826	-1.703	-0.467	0.952	1.973	0.329
TCGA-05-4249	4.484	2.26	-1.147	1.165	2.303	0.035	-1.487	-0.037	-0.758	1.706	0.834	-1.301	-0.12	-1.74	-1.117	0.713	-1.008	1.113	0.116	-0.754	0.132	1.047	1.089
TCGA-44-3919	4.518	2.432	1.373	3.574	2.267	2.527	1.812	2.06	-0.251	2.695	0.852	-1.158	2.79	-0.85	-0.475	1.62	0.29	0.236	-0.57	-1.002	0.219	-0.36	0.604
TCGA-50-6673	4.276	2.201	-3.19	1.806	2.658	0.39	0.677	1.115	-0.307	1.768	1.099	-0.154	0.267	-1.755	-1	1.345	-1.2	-1.234	-0.035	1.134	0.296	1.822	0.968
TCGA-75-7025	4.06	2.059	-0.728	2.107	2.748	-0.828	-0.236	0.867	1.145	1.541	0.906	-0.866	-0.691	-1.322	-0.909	0.997	0.43	-0.892	0.403	-0.655	2.391	1.998	-0.47
TCGA-55-7914	4.703	2.784	0.786	2.218	2.045	1.603	1.239	0.577	0.503	1.121	0.675	-0.992	2.017	-0.269	-0.609	-0.065	-0.257	-1.166	-2.184	-1.456	-0.826	-0.065	-2.149
TCGA-MP-A4T6	3.932	1.734	-1.136	2.136	2.25	0.711	-1.069	0.55	-0.228	0.885	-0.06	0.293	0.332	-0.723	0.212	0.544	0.213	0.067	-0.611	-1.63	0.783	1.439	-0.829
TCGA-MP-A4TD	4.154	0.651	-1.537	2.058	1.514	-0.514	0.334	1.239	0.173	1.739	-0.048	-0.118	-0.62	-1.363	-1.038	2.456	0.525	0.151	-1.156	-0.626	0.49	1.979	0.061
TCGA-NJ-A55A	4.257	2.175	0.928	3.818	2.928	1.256	0.604	1.802	0.525	2.026	0.981	-0.809	1.851	-1.136	-0.704	0.984	1.002	1.174	-0.117	-1.387	1.011	0.43	-1.32
TCGA-NJ-A55O	4.367	1.318	-0.426	1.296	1.609	0.535	-0.679	1.035	-1.157	1.712	0.076	0.566	0.536	-2.104	-1.067	0.39	1.174	0.261	-1.059	-1.16	1.506	0.42	-1.402
TCGA-NJ-A4YI	3.993	1.647	-1.934	-1.35	1.698	-0.675	-1.025	0.611	-0.25	0.125	0.573	-0.673	0.535	-1.844	-1.121	0.182	-1.455	0.595	0.735	-0.047	0.894	0.697	-0.29
TCGA-MP-A4TJ	4.852	2.187	-0.438	4.983	2.453	2.892	1.678	3.702	0.614	3.753	0.781	2.443	3.499	-1.357	0.97	2.636	1.141	0.308	-0.067	-0.717	1.273	-0.142	0.616
TCGA-MP-A5C7	3.55	1.152	-3.018	-1.269	0.283	-0.269	0.678	-0.724	-0.078	-0.04	-1.329	-0.494	-1.234	-1.932	-0.961	0.141	0.121	-0.673	-1.709	-0.825	-0.004	3.72	0.658
TCGA-O1-A52J	4.329	2.373	-1.417	0.961	2.439	-0.698	0.334	0.417	0.248	2.437	0.961	-0.751	0.127	-0.883	0.112	-0.8	0.738	-0.812	-1.498	-0.996	1.089	0.5	2.01
TCGA-MP-A4TH	4.439	2.138	0.324	3.742	2.776	1.502	0.06	2.093	-0.122	2.025	0.592	-0.17	1.45	-1.219	-1.153	1.748	1.235	0.686	-0.243	0.15	1.849	0.804	1.671
TCGA-NJ-A4YQ	4.686	1.974	-0.518	4.392	1.067	1.373	1.826	3.209	0.713	3.266	-0.467	-1.265	3.008	-0.448	-0.911	0.599	1.635	0.739	0.418	-1.564	1.405	-0.329	0.523
TCGA-95-A4VP	4.247	1.209	1.271	3.274	1.698	0.509	-1.129	1.78	0.142	2.061	0.696	1.73	0.822	-1.307	-0.939	1.781	1.127	0.989	-0.863	0.881	-0.309	0.19	0.204
TCGA-NJ-A55R	3.866	0.233	-3.583	-0.113	1.141	0.375	-1.329	-0.975	1.08	-1.167	1.199	-0.949	-1.061	-1.09	-0.701	0.626	0.434	-1.658	-2.587	-1.287	0.149	2.658	-2.435
TCGA-62-A46S	4.567	0.579	-2.308	0.599	1.489	0.422	-0.396	0.603	0.834	1.505	0.238	-0.547	0.599	-1.571	-0.641	-0.28	-0.156	-0.899	-1.79	-0.722	0.074	0.597	1.47
TCGA-44-3917	4.289	2.374	-2.356	0.51	0.462	-0.485	0.867	0.51	-0.217	2.427	0.975	-0.089	1.39	0.949	-1.289	-1.127	-0.367	-2.221	-1.77	0.271	0.074	0.069	-1.588
TCGA-49-AARQ	4.562	1.753	-0.784	2.959	0.762	1.141	1.094	1.577	-0.762	2.96	0.363	-0.741	1.938	-0.25	-1.359	0.152	0.863	-0.937	-1.265	-1.376	-1.924	0.264	-0.03
TCGA-49-AARO	4.586	2.135	-1.243	4.459	2.583	1.334	0.02	2.808	-0.551	3.335	1.779	1.583	2.398	0.492	0.851	0.964	1.533	1.821	-0.058	0.006	1.046	-0.989	1.004
TCGA-99-AA5R	4.859	2.648	-0.54	4.578	2.879	2.135	0.828	2.985	-0.69	3.566	1.193	0.922	3.296	-1.554	-0.973	1.721	0.926	1.209	-0.037	-0.413	0.609	-0.538	0.295
TCGA-S2-AA1A	4.574	2.067	-0.562	3.716	2.847	2.567	1.353	1.874	-0.778	2.452	1.484	0.454	2.666	1.217	-1.172	1.167	0.532	-0.314	-1.182	1.373	2.169	-0.057	1.36
TCGA-49-AARR	4.177	1.415	-3.803	2.653	2.611	-0.917	-0.135	1.464	0.282	1.998	1.273	2.33	-0.037	-0.854	-0.515	0.458	0.453	-0.837	-1.319	-0.364	1.341	-0.397	1.066
TCGA-L9-A7SV	3.504	0.854	-3.449	0.304	0.526	-0.24	-0.173	-0.291	-0.662	0.645	-1.4	-0.924	0.194	-1.85	-1.156	0.646	-0.73	-1.412	-1.395	-1.138	-1.61	0.781	-0.017
TCGA-49-AAR2	4.018	1.63	-0.448	1.654	0.904	0.962	-0.044	0.706	-0.041	0.925	-1.201	-0.83	0.417	-1.26	-0.449	0.937	0.142	-0.552	-0.412	1.426	0.703	1.279	0.186
TCGA-4B-A93V	4.312	0.608	-1.995	1.034	-1.298	0.119	-0.486	1.087	0.209	1.555	-1.182	0.232	0.716	-1.23	-0.513	1.291	-0.637	-1.499	-1.096	-0.937	-0.727	-0.158	0.777
TCGA-49-AAR0	4.215	1.752	-0.102	3.403	2.007	0.78	-0.303	2.123	-1.17	2.611	0.556	-0.129	1.726	-1.081	-0.377	0.724	1.002	0.22	-1.048	-0.927	1.124	0.381	0.628
TCGA-L9-A50W	3.842	2.422	-3.723	0.439	1.906	0.661	-0.51	-0.943	1.332	1.606	0.745	-0.792	0.87	-1.142	-2.702	-0.392	-1.538	-0.241	-1.046	-1.402	1.542	1.561	-1.989
TCGA-NJ-A4YG	4.347	2.109	-2.129	1.727	1.359	0.029	-0.39	1.286	0.783	1.979	-0.101	1.15	0.909	-0.062	0.062	0.122	-0.603	-0.236	-1.305	0.615	1.111	1.155	1.958
TCGA-MP-A4TE	3.626	3.234	-1.599	-1.395	-0.932	0.691	-1.637	-0.863	0.042	-0.236	-1.078	1.495	-1.01	-1.564	-0.688	0.763	-0.844	-1.66	-1.949	1.089	-2.208	4.089	1.386
TCGA-55-7816	5.056	2.398	-2.148	2.32	1.571	2.179	2.347	1.753	-0.258	2.922	-0.2	1.177	2.778	-0.223	0.573	-0.263	1.185	-0.647	-1.744	-0.914	2.429	0.522	2.279
