# Supplementary material for: Identification of fatty acid-related subtypes, the establishment of a prognostic signature, and immune infiltration characteristics in lung adenocarcinoma
Source: Aging (Albany NY). 2023 May 16;15(10):4202–35. doi: 10.18632/aging.204725 (PMC10258028; doi:10.18632/aging.204725)
Supplement: Supplementary Table 16 [file aging-15-204725-s015.xlsx]

## Sheet: Sheet1
Supplementary Table 16. Tumor immune microenvironment score for all LUAD patients.
ID	StromalScore	ImmuneScore	ESTIMATEScore	TumorPurity
TCGA-NJ-A7XG	-1071.43	486.776	-584.659	0.868233
TCGA-NJ-A4YP	1420.75	1632.26	3053.01	0.49485
TCGA-NJ-A4YF	-162.762	816.828	654.066	0.7642
TCGA-MP-A4TK	1821.51	2397.26	4218.77	0.339648
TCGA-MP-A4TI	1759.42	3375.02	5134.43	0.210546
TCGA-MP-A4TF	-560.002	1145.91	585.905	0.770615
TCGA-MP-A4TC	1563.02	2105.05	3668.08	0.414486
TCGA-MP-A4TA	275.87	1593.15	1869.03	0.637661
TCGA-MP-A4T9	1093.44	2078.54	3171.98	0.479601
TCGA-MP-A4T8	556.899	661.794	1218.69	0.708182
TCGA-MP-A4T7	98.1672	1742	1840.16	0.640919
TCGA-MP-A4T4	1407.02	2871.49	4278.51	0.331387
TCGA-MP-A4SY	1150.39	1343.97	2494.36	0.564367
TCGA-MP-A4SV	711.794	2192.85	2904.64	0.513657
TCGA-MN-A4N5	40.5734	1893.65	1934.23	0.630259
TCGA-MN-A4N4	1199.92	1405.24	2605.17	0.550865
TCGA-MN-A4N1	-42.4687	607.541	565.072	0.77256
TCGA-L9-A8F4	728.674	2531.93	3260.61	0.468144
TCGA-L9-A743	1325.19	2884.56	4209.75	0.340893
TCGA-L9-A5IP	-45.8871	1365.2	1319.32	0.697676
TCGA-L4-A4E5	-8.15375	913.473	905.319	0.739898
TCGA-J2-A4AD	217.966	555.681	773.647	0.752761
TCGA-J2-8194	877.428	1608.14	2485.57	0.565432
TCGA-J2-8192	2093.05	2424.33	4517.38	0.298108
TCGA-99-8033	443.017	2077.85	2520.87	0.56115
TCGA-97-8547	1503.7	1711.12	3214.82	0.474073
TCGA-97-8179	618.47	1162.65	1781.12	0.647548
TCGA-97-8176	274.701	1457.79	1732.49	0.65297
TCGA-97-8175	376.635	2028.19	2404.82	0.575167
TCGA-97-8174	1372.27	2068.75	3441.02	0.444582
TCGA-95-A4VN	852.914	2687.95	3540.87	0.431406
TCGA-95-A4VK	225.203	1795.71	2020.91	0.620329
TCGA-95-8494	163.804	1708.65	1872.45	0.637274
TCGA-95-7948	129.186	956.734	1085.92	0.721806
TCGA-95-7947	-124.069	1612.19	1488.12	0.679712
TCGA-95-7944	657.842	2683.2	3341.04	0.45768
TCGA-95-7567	766.595	1698.81	2465.4	0.56787
TCGA-95-7562	602.316	1617.15	2219.47	0.597209
TCGA-95-7043	15.7556	236.452	252.208	0.800895
TCGA-95-7039	710.948	1258.97	1969.91	0.626183
TCGA-93-A4JQ	1537.78	2772.73	4310.52	0.326951
TCGA-93-A4JP	1118.11	2056.89	3174.99	0.479212
TCGA-93-A4JO	1108.81	2841.7	3950.52	0.376411
TCGA-93-8067	30.3421	1017.9	1048.25	0.725623
TCGA-91-8499	280.851	1519.88	1800.73	0.645351
TCGA-91-6848	1595.1	2497.47	4092.57	0.357012
TCGA-91-6847	-1442.88	-141.056	-1583.93	0.931426
TCGA-91-6836	-321.825	919.694	597.869	0.769494
TCGA-91-6831	1217.72	1677.72	2895.44	0.514816
TCGA-91-6830	1440.23	2135.18	3575.4	0.426827
TCGA-86-A4JF	395.145	2014.76	2409.91	0.574557
TCGA-86-A4D0	-488.686	773.391	284.704	0.798029
TCGA-86-8674	-429.083	219.316	-209.767	0.839629
TCGA-86-8673	582.991	1501.56	2084.55	0.612976
TCGA-86-8672	1058.64	2295.52	3354.17	0.455965
TCGA-86-8585	562.814	2591.5	3154.32	0.481874
TCGA-86-8359	401.671	2159	2560.67	0.556305
TCGA-86-8358	84.3237	807.075	891.399	0.741271
TCGA-86-8278	1073.54	1692.43	2765.97	0.531014
TCGA-86-8075	1777.51	1778.73	3556.24	0.429369
TCGA-86-8074	1274.92	1812.44	3087.36	0.490463
TCGA-86-8055	1815.26	1890.85	3706.11	0.409399
TCGA-86-8054	24.2518	362.641	386.893	0.7889
TCGA-86-7955	-1274.89	-152.437	-1427.32	0.922815
TCGA-86-7953	758.446	2237.82	2996.26	0.502071
TCGA-86-7713	-471.164	320.557	-150.607	0.834881
TCGA-86-7711	1224.78	2055.82	3280.59	0.46555
TCGA-86-7701	1224.06	2512.81	3736.87	0.405275
TCGA-86-6562	1411.73	1514.5	2926.23	0.510935
TCGA-83-5908	907.35	2773.01	3680.36	0.412845
TCGA-80-5611	287.255	2347.08	2634.34	0.547287
TCGA-80-5608	-58.9948	1336.47	1277.47	0.702063
TCGA-78-8662	-290.432	307.984	17.552	0.821041
TCGA-78-8660	590.691	2643.54	3234.23	0.471563
TCGA-78-8655	793.385	2218.64	3012.02	0.50007
TCGA-78-7542	-735.815	1217.59	481.771	0.780266
TCGA-78-7536	108.549	1531.83	1640.38	0.663151
TCGA-78-7220	-191.247	486.761	295.514	0.797072
TCGA-78-7166	-369.609	1182.61	813.002	0.748946
TCGA-78-7160	1271.14	2534.55	3805.69	0.39602
TCGA-78-7154	203.398	847.83	1051.23	0.725321
TCGA-78-7150	584.004	511.65	1095.65	0.720817
TCGA-78-7148	261.712	1392.07	1653.78	0.661677
TCGA-78-7147	-293.1	1348.24	1055.14	0.724926
TCGA-78-7146	-32.4559	1144.92	1112.47	0.719104
TCGA-78-7145	730.713	1301.78	2032.5	0.618995
TCGA-75-7027	939.748	910.093	1849.84	0.639828
TCGA-75-6214	-424.004	677.602	253.597	0.800773
TCGA-75-5147	924.756	2121.83	3046.59	0.495669
TCGA-75-5125	924.543	2479.53	3404.07	0.449433
TCGA-73-A9RS	-427.913	815.371	387.458	0.78885
TCGA-73-7499	727.873	2509.45	3237.33	0.471161
TCGA-73-4677	364.666	1582.26	1946.93	0.628811
TCGA-73-4676	526.351	1440.24	1966.59	0.626564
TCGA-73-4675	856.52	1292.71	2149.23	0.605446
TCGA-73-4670	638.51	1035.03	1673.54	0.659499
TCGA-73-4666	568.793	2698.73	3267.52	0.467248
TCGA-73-4659	1125.08	1607.07	2732.15	0.535214
TCGA-69-A59K	364.721	1770.89	2135.61	0.607037
TCGA-69-8253	118.707	1334.94	1453.65	0.683415
TCGA-69-7980	821.648	2071.57	2893.21	0.515095
TCGA-69-7979	472.601	695.777	1168.38	0.713377
TCGA-69-7978	1579.94	3096	4675.93	0.275814
TCGA-69-7974	1108.34	2498.25	3606.58	0.422684
TCGA-69-7973	499.501	897.237	1396.74	0.68949
TCGA-69-7763	1325.98	1553.1	2879.08	0.516873
TCGA-69-7760	-10.1466	428.868	418.721	0.786021
TCGA-67-6215	-117.627	1503.33	1385.71	0.690662
TCGA-67-3774	790.844	2151.53	2942.37	0.508897
TCGA-67-3771	967.17	2089.73	3056.9	0.494355
TCGA-64-5815	2027.43	2303.76	4331.2	0.32408
TCGA-64-5781	821.039	2164.63	2985.67	0.503416
TCGA-64-5775	470.177	1216.03	1686.2	0.658101
TCGA-64-5774	-5.71223	473.224	467.511	0.781573
TCGA-64-1680	-109.356	1100.68	991.323	0.731347
TCGA-64-1679	1681.56	1719.74	3401.3	0.449797
TCGA-64-1678	-304.404	414.569	110.165	0.813205
TCGA-64-1677	-27.2194	1858.44	1831.22	0.641926
TCGA-62-A472	113.785	1916.25	2030.03	0.619279
TCGA-62-A471	-844.669	709.804	-134.866	0.833607
TCGA-62-A46Y	421.24	2417.02	2838.26	0.521993
TCGA-62-A46V	777.996	1132.43	1910.43	0.632967
TCGA-62-A46O	-1077.47	-419.819	-1497.29	0.926723
TCGA-62-8399	681.229	1177.29	1858.52	0.638849
TCGA-62-8398	464.268	1691.51	2155.77	0.604682
TCGA-62-8394	308.095	1373.83	1681.93	0.658573
TCGA-55-A57B	1021.28	1896.63	2917.9	0.511985
TCGA-55-A493	801.18	2630.83	3432.01	0.445766
TCGA-55-A490	859.866	1575.77	2435.64	0.571461
TCGA-55-A48Y	1194.65	1466.22	2660.87	0.544024
TCGA-55-A48X	822.392	2507.97	3330.36	0.459073
TCGA-55-8615	-66.2454	650.031	583.786	0.770813
TCGA-55-8614	698.814	1263.3	1962.11	0.627076
TCGA-55-8511	1181.43	2345.12	3526.56	0.4333
TCGA-55-8508	618.803	1683.86	2302.67	0.587369
TCGA-55-8505	783.068	671.808	1454.88	0.683283
TCGA-55-8302	300.564	1739.1	2039.67	0.618168
TCGA-55-8299	1928.41	2969.07	4897.48	0.244415
TCGA-55-8205	1258.63	3073.91	4332.53	0.323895
TCGA-55-8204	619.504	1757.75	2377.25	0.578473
TCGA-55-8203	680.005	2029.22	2709.22	0.538054
TCGA-55-8094	-1301.68	-158.554	-1460.24	0.924665
TCGA-55-8092	859.749	2438.97	3298.71	0.463194
TCGA-55-8090	697.437	1680.7	2378.14	0.578367
TCGA-55-8089	1148.69	3256.37	4405.06	0.313805
TCGA-55-7994	245.686	2641.79	2887.48	0.515817
TCGA-55-7913	-843.235	591.804	-251.431	0.842935
TCGA-55-7911	509.122	2586.77	3095.89	0.489371
TCGA-55-7903	103.524	1856.46	1959.99	0.627319
TCGA-55-7726	1582.93	1450.03	3032.96	0.497406
TCGA-55-7724	1275.07	2341.27	3616.34	0.421385
TCGA-55-7574	1735.36	2876.65	4612.01	0.284822
TCGA-55-7570	-189.973	224.413	34.4407	0.819624
TCGA-55-6986	359.793	1717.07	2076.86	0.613867
TCGA-55-6985	1243.65	2382.79	3626.43	0.420041
TCGA-55-6984	-242.501	1326.42	1083.91	0.72201
TCGA-55-6982	1458.23	1943.95	3402.19	0.449681
TCGA-55-6981	580.552	1361.85	1942.4	0.629327
TCGA-55-6980	1426.44	2421.93	3848.38	0.390258
TCGA-55-6979	1621.55	3131.88	4753.43	0.264862
TCGA-55-6978	1973.16	3015.41	4988.56	0.231429
TCGA-55-6975	1469.57	1291.26	2760.83	0.531653
TCGA-55-6970	661.451	2144.34	2805.79	0.526052
TCGA-55-6968	553.258	2052	2605.26	0.550854
TCGA-55-6712	1037.57	2638.26	3675.84	0.413449
TCGA-55-5899	901.775	1565.95	2467.72	0.567591
TCGA-55-1596	-22.1057	1086.37	1064.27	0.724002
TCGA-55-1595	1163.01	1643.48	2806.48	0.525966
TCGA-53-7624	-340.034	1012.38	672.348	0.762466
TCGA-50-8459	2205.28	2767.61	4972.89	0.233666
TCGA-50-6595	1703.58	2075.08	3778.66	0.39966
TCGA-50-6594	380.03	1241.98	1622.01	0.665167
TCGA-50-6591	-553.952	-570.241	-1124.19	0.904765
TCGA-50-6590	977.749	2651.92	3629.67	0.41961
TCGA-50-5946	876.73	815.429	1692.16	0.657443
TCGA-50-5941	1262.09	2977.68	4239.77	0.336747
TCGA-50-5939	1162.02	2227.02	3389.03	0.451404
TCGA-50-5936	900.413	1551.29	2451.7	0.569525
TCGA-50-5933	1983.78	2263.82	4247.6	0.335665
TCGA-50-5932	38.9112	812.315	851.226	0.745216
TCGA-50-5931	-23.1022	97.7293	74.627	0.81623
TCGA-50-5930	1126.24	2139.24	3265.47	0.467513
TCGA-50-5072	622.923	1087.87	1710.79	0.655379
TCGA-50-5066	977.968	2151.04	3129.01	0.485126
TCGA-50-5045	2026.85	3026.09	5052.94	0.222226
TCGA-50-5044	865.58	1920.93	2786.51	0.528456
TCGA-49-AARN	423.317	1592.14	2015.46	0.620957
TCGA-49-AARE	465.481	1507.03	1972.51	0.625886
TCGA-49-AAR9	-397.595	317.755	-79.8399	0.829118
TCGA-49-AAR4	693.484	2792.43	3485.91	0.438669
TCGA-49-AAR3	1248.6	2892.27	4140.87	0.35038
TCGA-49-AAQV	113.829	1864.99	1978.82	0.625164
TCGA-49-6767	292.077	2003.72	2295.79	0.588185
TCGA-49-6761	586.473	2071.2	2657.67	0.544417
TCGA-49-6745	1375.42	2446.42	3821.83	0.393843
TCGA-49-6744	1756.81	2802.47	4559.29	0.292231
TCGA-49-6743	1057	1656.21	2713.2	0.537561
TCGA-49-6742	-259.792	640.474	380.682	0.78946
TCGA-49-4507	347.786	2322.04	2669.82	0.54292
TCGA-49-4506	387.556	2187.34	2574.9	0.554568
TCGA-49-4494	346.847	1776.47	2123.32	0.60847
TCGA-49-4490	786.13	1394.63	2180.76	0.601757
TCGA-49-4486	-742.835	584.958	-157.877	0.835468
TCGA-44-A4SS	1108.63	2568.88	3677.51	0.413225
TCGA-44-A47A	512.968	2252.62	2765.59	0.531062
TCGA-44-8117	786.501	1243.4	2029.9	0.619294
TCGA-44-7672	1631.48	2878.1	4509.58	0.299201
TCGA-44-7671	796.488	693.542	1490.03	0.679507
TCGA-44-7670	-422.998	684.302	261.304	0.800094
TCGA-44-7669	542.832	1743.75	2286.58	0.589278
TCGA-44-7667	48.4967	662.753	711.249	0.758759
TCGA-44-7662	1763.22	2020.4	3783.62	0.398992
TCGA-44-7661	1573.24	2581.2	4154.44	0.348514
TCGA-44-7660	-58.8974	1157.41	1098.51	0.720526
TCGA-44-6779	1217.61	2728.89	3946.5	0.376956
TCGA-44-6145	1332.58	2784.85	4117.42	0.353602
TCGA-44-5644	-630.018	240.985	-389.033	0.85363
TCGA-44-5643	-495.479	1446.28	950.797	0.735391
TCGA-44-4112	1388.67	1574.11	2962.78	0.506316
TCGA-44-3398	1853.83	2576.65	4430.48	0.31026
TCGA-44-3396	1750.72	2738.49	4489.21	0.302052
TCGA-44-2668	1497.39	2737.04	4234.44	0.337484
TCGA-44-2665	2024.21	2036.12	4060.33	0.361429
TCGA-44-2662	1498.94	2303.41	3802.35	0.39647
TCGA-38-6178	1059.83	1364.76	2424.59	0.572792
TCGA-38-4632	834.081	2369.29	3203.37	0.475553
TCGA-38-4631	33.0211	1324.11	1357.13	0.693688
TCGA-38-4630	235.542	520.124	755.666	0.754496
TCGA-38-4629	1520.59	2655.42	4176	0.345546
TCGA-38-4628	983.522	1466.29	2449.82	0.569752
TCGA-38-4627	2550.39	2313.41	4863.79	0.249206
TCGA-38-4625	559.561	1944.19	2503.75	0.563228
TCGA-35-5375	627.975	1912.86	2540.83	0.558722
TCGA-35-4123	1350.39	2849.64	4200.03	0.342234
TCGA-35-4122	1353.07	2837.36	4190.42	0.343559
TCGA-35-3615	421.956	1359.71	1781.67	0.647486
TCGA-05-5429	263.606	922.488	1186.09	0.711552
TCGA-05-5425	950.843	2697	3647.85	0.417187
TCGA-05-4434	1353.25	2771.38	4124.63	0.352612
TCGA-05-4425	1094.56	2439.01	3533.58	0.432371
TCGA-05-4420	376.112	821.279	1197.39	0.710386
TCGA-05-4418	667.371	2196.84	2864.21	0.51874
TCGA-05-4415	-434.861	970.914	536.054	0.775258
TCGA-05-4402	947.194	1795.59	2742.79	0.533894
TCGA-05-4398	1044.99	2370.73	3415.72	0.447905
TCGA-05-4397	-32.3327	1311.56	1279.23	0.70188
TCGA-05-4396	27.4145	692.928	720.342	0.757889
TCGA-05-4390	765.423	1088.74	1854.16	0.63934
TCGA-05-4250	963.346	2161.63	3124.97	0.485644
GSM773764	372.986	2087.24	2460.23	0.568496
GSM773756	1136.28	3049.28	4185.56	0.344229
GSM773754	415.839	2395.21	2811.05	0.525396
GSM773751	-133.568	1443.6	1310.03	0.698652
GSM773749	1162.43	2188.68	3351.12	0.456364
GSM773745	1224.23	2316.22	3540.46	0.431461
GSM773743	759.824	1557.6	2317.43	0.585614
GSM773742	-557.862	776.168	218.305	0.803865
GSM773741	438.442	706.379	1144.82	0.715796
GSM773740	319.289	1364.37	1683.66	0.658383
GSM773736	653.322	1854.9	2508.22	0.562686
GSM773730	728.776	1720.16	2448.94	0.569858
GSM773729	445.154	1342.39	1787.55	0.646828
GSM773727	561.298	1835.88	2397.17	0.576086
GSM773725	536.374	2502.89	3039.26	0.496603
GSM773724	1067.33	2381.94	3449.27	0.443497
GSM773723	1860.55	3074.86	4935.4	0.239013
GSM773722	613.89	1473.07	2086.96	0.612696
GSM773720	719.514	1791.92	2511.43	0.562296
GSM773718	1265.08	2581.52	3846.61	0.390497
GSM773717	161.515	2281.16	2442.67	0.570614
GSM773716	1083.65	2210.3	3293.94	0.463815
GSM773715	-609.233	1249.04	639.81	0.765548
GSM773703	270.038	1917.11	2187.14	0.601008
GSM773702	-232.47	1307.46	1074.99	0.722916
GSM773700	975.047	2720.06	3695.1	0.410872
GSM773697	205.067	317.011	522.078	0.776552
GSM773694	542.915	3035.25	3578.16	0.426461
GSM773692	1232.49	1964.04	3196.53	0.476435
GSM773683	723.105	499.511	1222.62	0.707775
GSM773679	1802.5	3178.09	4980.59	0.232568
GSM773678	1371.66	1646.43	3018.09	0.499298
GSM773677	1074.9	3169.08	4243.97	0.336166
GSM773676	1022.48	2626.23	3648.71	0.417072
GSM773675	965.867	1924.33	2890.2	0.515474
GSM773674	1205.71	3169.33	4375.04	0.317986
GSM773673	-59.6145	1018.1	958.481	0.734626
GSM773672	559.874	2308.71	2868.58	0.518191
GSM773669	730.7	2542.95	3273.65	0.466452
GSM773666	866.932	1976.34	2843.27	0.521365
GSM773665	1148.77	3219.79	4368.56	0.318887
GSM773661	1177.95	2130.75	3308.7	0.461895
GSM773660	736.811	1479.29	2216.1	0.597606
GSM773659	1093.35	1694.87	2788.22	0.528243
GSM773658	709.946	880.095	1590.04	0.668663
GSM773656	1489.92	2740.12	4230.04	0.338092
GSM773655	113.618	923.737	1037.35	0.726722
GSM773651	558.464	-179.518	378.945	0.789617
GSM773650	-137.625	731.15	593.525	0.769901
GSM773649	1284.48	2739.49	4023.97	0.3664
GSM773647	516.63	2476.75	2993.38	0.502438
GSM773646	1417.82	2806.85	4224.67	0.338833
GSM773645	52.7791	318.416	371.195	0.790314
GSM773644	705.651	2580.06	3285.71	0.464885
GSM773643	1106.41	2408.26	3514.67	0.434872
GSM773641	-118.077	911.738	793.661	0.750824
GSM773640	1360.62	1803.76	3164.37	0.48058
GSM773639	179.794	825.356	1005.15	0.729961
GSM773636	349.97	955.351	1305.32	0.699146
GSM773633	408.919	1797.07	2205.99	0.598795
GSM773630	131.634	1960.92	2092.56	0.612047
GSM773628	1204.92	873.128	2078.05	0.613729
GSM773627	670.049	1720.38	2390.43	0.576895
GSM773626	755.828	2156.71	2912.54	0.512661
GSM773621	1323.48	2493.09	3816.57	0.394553
GSM773617	306.666	1889.12	2195.78	0.599994
GSM773616	-117.069	1924	1806.93	0.644655
GSM773613	824.447	2777.28	3601.73	0.42333
GSM773610	928.765	2283.19	3211.96	0.474443
GSM773605	1436.04	2658.19	4094.23	0.356785
GSM773604	666.575	3064.83	3731.4	0.406009
GSM773603	980.179	1389.06	2369.24	0.579432
GSM773601	57.2001	1401.97	1459.17	0.682823
GSM773600	1713.47	2469.85	4183.32	0.344538
GSM773599	961.643	2130.7	3092.34	0.489825
GSM773598	-310.608	640.807	330.199	0.793987
GSM773597	346	1925.96	2271.96	0.591011
GSM773593	578.28	2063.7	2641.98	0.546348
GSM773592	1049.69	545.124	1594.81	0.668142
GSM773591	1507.5	1991.3	3498.8	0.436969
GSM773590	1160.16	2883.87	4044.03	0.363658
GSM773589	858.592	2761.31	3619.91	0.42091
GSM773588	2036.07	2810.26	4846.32	0.251689
GSM773587	522.697	1826.42	2349.11	0.581838
GSM773586	1311.02	1489.82	2800.84	0.52667
GSM773585	1108.31	1984.75	3093.06	0.489734
GSM773584	1247.31	1984.11	3231.43	0.471925
GSM773583	1478.68	3168.13	4646.81	0.27992
GSM773582	35.6136	975.786	1011.4	0.729334
GSM773581	441.747	1729.48	2171.22	0.602874
GSM773580	1977.7	2752.04	4729.74	0.268214
GSM773579	673.259	1333.93	2007.19	0.621908
GSM773578	-186.288	1350.2	1163.91	0.713836
GSM773577	1029.71	2372.8	3402.51	0.449639
GSM773576	1741.5	2926.88	4668.38	0.27688
GSM773575	322.699	2295.17	2617.87	0.549308
GSM773574	1341.45	2284.19	3625.64	0.420147
GSM773573	886.482	1076.91	1963.4	0.626929
GSM773572	1620.68	3123.64	4744.32	0.266151
GSM773571	1751.41	2067.2	3818.61	0.394277
GSM773570	767.708	2601.7	3369.4	0.453974
GSM773568	1672.23	1913.39	3585.62	0.425471
GSM773566	1230.54	2203.5	3434.04	0.445499
GSM773565	956.845	2176.8	3133.65	0.48453
GSM773563	653.388	2019.3	2672.69	0.542566
GSM773562	818.685	1904.51	2723.2	0.536323
GSM773560	1302.18	2082.73	3384.91	0.451944
GSM773559	490.632	2671.03	3161.66	0.480929
GSM773558	164.583	-336.767	-172.184	0.83662
GSM773557	704.022	1571.3	2275.32	0.590613
GSM773556	-100.732	883.539	782.807	0.751875
GSM773555	575.725	1981.2	2556.93	0.556761
GSM773552	1045.99	1802.07	2848.06	0.520765
GSM773551	621.24	2511.38	3132.62	0.484662
GSM773550	759.341	981.236	1740.58	0.652071
GSM773548	119.586	521.361	640.947	0.76544
GSM773547	641.529	1668.86	2310.39	0.586451
GSM773546	1221.93	1141.6	2363.53	0.580115
GSM773545	373.429	2339.91	2713.34	0.537545
GSM773544	297.214	818.578	1115.79	0.718765
GSM773543	-451.138	777.583	326.445	0.794322
GSM773542	568.773	1241.21	1809.98	0.644313
GSM773541	783.292	1978.31	2761.6	0.531558
GSM773540	-557.017	436.291	-120.726	0.832459
GSM1855238	-249.734	683.101	433.367	0.78469
GSM1855237	598.862	1116.89	1715.76	0.654829
GSM1855235	258.093	974.281	1232.37	0.706762
GSM1855234	1403.8	2041.15	3444.95	0.444065
GSM1855232	907.157	2431.12	3338.27	0.45804
GSM1855231	863.146	1236.9	2100.05	0.611177
GSM1855230	967.011	2138.53	3105.54	0.488135
GSM1855228	1336.47	2050.31	3386.79	0.451698
GSM1855226	422.116	1305.3	1727.41	0.653534
GSM1855225	-479.381	1528.14	1048.76	0.725571
GSM1855224	1106.91	2099.2	3206.1	0.475199
GSM1855220	-449.018	600.68	151.662	0.809645
GSM1855211	59.7024	1493.31	1553.02	0.672695
GSM1855207	-400.488	2066.2	1665.72	0.660362
GSM1855206	-981.888	629.26	-352.627	0.850834
GSM1855204	1065.54	593.715	1659.26	0.661074
GSM1855203	733.39	1865.25	2598.65	0.551664
GSM1855202	-267.892	124.345	-143.547	0.83431
GSM1855199	452.943	854.882	1307.82	0.698884
GSM1855198	-20.4613	1266.15	1245.69	0.705378
GSM1855196	867.744	1479.11	2346.85	0.582107
GSM1855193	742.768	1680.68	2423.45	0.572929
GSM1855190	1404.42	2665.26	4069.68	0.360149
GSM1855189	471.916	1225.42	1697.33	0.65687
GSM1855185	1744.22	2583.83	4328.05	0.324517
GSM1855184	1641.62	2832.74	4474.36	0.304129
GSM1855181	420.765	1230.67	1651.44	0.661935
GSM1855180	1524.48	2086.25	3610.73	0.422133
GSM1855179	1299.17	1783.74	3082.9	0.491033
GSM1855178	-392.727	1267.51	874.787	0.742906
GSM1855176	1117.91	3043.28	4161.19	0.347585
GSM1855175	1239.58	2868.88	4108.46	0.354833
GSM1855173	-723.133	-162.864	-885.997	0.889323
GSM1855171	320.398	1563.08	1883.48	0.636025
GSM1855168	1675.03	2505.43	4180.46	0.344932
GSM1855166	1088.08	2816.91	3904.99	0.382593
GSM1855161	616.017	2944.45	3560.46	0.428809
GSM1855160	501.672	1077.95	1579.63	0.669799
GSM1855157	1563.95	2113.08	3677.03	0.413289
GSM1855156	1021.95	3113.26	4135.21	0.351159
GSM1855153	-66.2068	1022.32	956.114	0.734862
GSM1855150	777.267	470.193	1247.46	0.705194
GSM1855147	1680.42	2674.06	4354.48	0.320846
GSM1855146	377.004	2207.71	2584.71	0.553369
GSM1855145	1288.51	2383.09	3671.6	0.414015
GSM1855144	-174.343	1371.72	1197.38	0.710387
GSM1855142	635.458	2547.28	3182.74	0.478214
GSM1855140	1684.66	2677.8	4362.46	0.319735
GSM1855138	423.885	2123.22	2547.1	0.557959
GSM1855137	750.79	1846.49	2597.28	0.551831
GSM1855136	1084.34	1753.49	2837.83	0.522046
GSM1855135	825.092	1896.41	2721.5	0.536534
GSM1855132	1581.6	2884.29	4465.89	0.305314
GSM1855131	524.599	530.26	1054.86	0.724954
GSM1855128	1747.76	2430.18	4177.93	0.34528
GSM1855125	1533.62	1561.54	3095.16	0.489464
GSM1855123	1249.09	2532.78	3781.87	0.399228
GSM1855122	-531.5	1251.47	719.97	0.757925
GSM1855121	1979.07	2743.04	4722.12	0.269291
GSM1855120	1247.25	2808.88	4056.14	0.362003
GSM1855118	73.0746	1203.66	1276.73	0.702141
GSM1855117	-625.88	810.064	184.183	0.806834
GSM1855116	-1325.58	-310.684	-1636.26	0.934194
GSM1855114	562.418	2373.61	2936.03	0.509698
GSM1855109	822.096	2357.55	3179.65	0.478612
GSM1855108	1276.06	556.616	1832.68	0.641761
GSM1855107	1717.2	2832.67	4549.86	0.293553
GSM1855103	291.371	926.66	1218.03	0.70825
GSM1855101	-146.801	568.103	421.301	0.785787
GSM1855097	1016.38	1687.4	2703.77	0.538728
GSM1855096	104.993	1844.71	1949.71	0.628494
GSM1855095	711.954	1275.71	1987.66	0.62415
GSM1855094	-468.052	193.759	-274.293	0.844736
GSM1855089	891.717	1884.65	2776.37	0.52972
GSM1855085	164.197	1176.66	1340.85	0.695408
GSM1855084	-202.844	1255.76	1052.92	0.725151
GSM1855083	-267.982	-120.496	-388.478	0.853587
GSM1855079	1024.79	2028.54	3053.33	0.494809
GSM1855078	-310.579	1852.25	1541.67	0.673926
GSM1855073	1081.99	1651.74	2733.72	0.535019
GSM1855068	1867.95	2476.19	4344.14	0.322283
GSM1855066	329.07	1128.6	1457.67	0.682984
GSM1855065	1320.04	1566.12	2886.16	0.515982
GSM1855064	1172.12	2333.35	3505.47	0.436087
GSM1855062	1062.04	2665.38	3727.41	0.406544
GSM1855060	1538.67	1386.39	2925.06	0.511083
GSM1855051	544.294	1725.85	2270.14	0.591226
GSM1855050	522.364	2089.51	2611.87	0.550044
GSM1855049	805.413	2848.02	3653.43	0.416441
GSM1855047	1616.19	2587.93	4204.12	0.34167
GSM1855045	105.504	1553.98	1659.48	0.661049
GSM1855043	371.785	1545.31	1917.09	0.63221
GSM1855042	1229.73	2483.71	3713.44	0.408417
GSM1855039	1761.17	2597.9	4359.06	0.320208
GSM1855038	381.228	997.006	1378.23	0.691454
GSM1855037	-287.743	526.944	239.201	0.802037
GSM1855033	141.687	957.967	1099.65	0.72041
GSM1855032	976.948	2006.07	2983.02	0.503752
GSM1855029	224.284	1357.06	1581.35	0.669611
GSM1855028	-176.103	1044.86	868.761	0.743497
GSM1855027	1261.73	2033.23	3294.96	0.463683
GSM1855026	888.184	3352.65	4240.83	0.3366
GSM1855024	1453.62	2907.73	4361.35	0.319891
GSM1855023	66.181	702.831	769.012	0.753209
GSM1855022	488.344	2712.07	3200.42	0.475933
GSM1855021	893.648	2937.06	3830.71	0.392644
GSM1855020	68.5817	924.038	992.62	0.731217
GSM1855019	1535.94	2248.71	3784.65	0.398853
GSM1855018	1087.01	2089.54	3176.56	0.479011
GSM1855016	562.055	2055.84	2617.89	0.549305
GSM1855014	1237.37	2686.28	3923.65	0.380061
GSM1855012	813.689	1582.3	2395.99	0.576228
GSM1855009	600.596	1267.14	1867.74	0.637806
GSM1855006	1292.15	1879.42	3171.57	0.479653
GSM1855001	1013.17	1769.7	2782.87	0.52891
GSM1855000	-26.1086	1825.45	1799.34	0.645506
GSM1854998	1077.37	1944.37	3021.73	0.498835
GSM1854997	668.98	1087.16	1756.14	0.650338
GSM1854995	494.655	1871.12	2365.78	0.579847
GSM1854992	1323.78	1676.24	3000.02	0.501595
GSM1854986	1611.53	2531.77	4143.3	0.350047
GSM1854984	1827.29	2228.39	4055.68	0.362065
GSM1854983	165.113	879.025	1044.14	0.726037
GSM1854981	-468.26	747.613	279.353	0.798502
GSM1854980	2055.25	2650.18	4705.44	0.271649
GSM1854975	833.283	2054.7	2887.98	0.515754
GSM1854971	797.693	2532.18	3329.87	0.459136
GSM1854969	-222.508	511.787	289.279	0.797624
GSM1854967	1105.81	1446.8	2552.61	0.557287
GSM1854965	1278.11	2328.56	3606.66	0.422673
GSM1854964	1117.66	648.156	1765.81	0.649258
GSM1854963	1211.9	1541.99	2753.89	0.532516
GSM1854961	836.768	1669.04	2505.81	0.562978
GSM1854956	128.975	2418.74	2547.72	0.557884
GSM1854955	-384.222	437.252	53.0303	0.818057
GSM1854954	1680.43	2492.27	4172.71	0.346
GSM1854953	304.301	2155.41	2459.71	0.568558
GSM1854948	-433.187	1609.05	1175.86	0.712606
GSM1854947	228.528	1462.3	1690.82	0.65759
GSM1854945	1131.94	2224.1	3356.04	0.45572
GSM1854944	1542.71	2737.46	4280.18	0.331156
GSM1854942	1324.39	1661.86	2986.24	0.503343
GSM1854941	-36.2481	1688.8	1652.55	0.661813
GSM1854938	666.304	1548.58	2214.89	0.597748
GSM1854933	219.165	401.157	620.322	0.767385
GSM1854932	1582.65	2027.6	3610.25	0.422196
GSM1854928	1177.36	2480.98	3658.34	0.415787
GSM1854927	1065.22	2868.11	3933.33	0.378747
GSM1854921	168.065	1667.38	1835.45	0.64145
GSM1854916	704.986	1274.43	1979.42	0.625095
GSM1854915	1426.77	2403.26	3830.04	0.392736
GSM1854913	1543.43	2574.74	4118.17	0.353499
GSM1854910	1122.55	3027.53	4150.07	0.349115
GSM1854909	399.654	1777.04	2176.7	0.602233
GSM1854908	1349.68	3060.03	4409.7	0.313157
GSM1854906	55.4896	872.08	927.57	0.737697
GSM1854904	773.736	2571.83	3345.57	0.457088
GSM1854903	1491.55	2583.96	4075.52	0.35935
GSM1854899	730.967	1899.67	2630.64	0.547741
GSM1854895	1143.31	2108.65	3251.97	0.469265
GSM1854893	1745.87	2067.68	3813.55	0.394961
GSM1854892	-112.354	1415.79	1303.44	0.699344
GSM1854891	736.546	1567.49	2304.04	0.587206
GSM1854890	1217.32	2074.86	3292.19	0.464043
GSM1854889	341.311	1254.2	1595.51	0.668066
GSM1854887	300.604	883.675	1184.28	0.711739
GSM1854886	305.065	1019.79	1324.85	0.697094
GSM1854885	783.864	1492.86	2276.73	0.590446
GSM1854883	-717.798	767.851	50.0535	0.818308
GSM1854882	871.573	1982.93	2854.5	0.519958
GSM1854881	1151.65	1889.5	3041.16	0.496362
GSM1854880	966.248	2629.58	3595.83	0.424114
GSM1854877	1185.91	2925.65	4111.56	0.354407
GSM1854876	62.3065	1267.86	1330.16	0.696535
GSM1854873	555.381	635.769	1191.15	0.71103
GSM1854869	-153.969	886.417	732.448	0.756729
GSM1854868	470.556	1762.56	2233.12	0.595601
GSM1854866	214.457	1821.45	2035.91	0.618602
GSM1854865	1779.64	2100.09	3879.72	0.386018
GSM1854861	1416.08	1902.68	3318.76	0.460585
GSM1854859	1580.74	2618.28	4199.02	0.342374
GSM1854856	1677.25	2532.97	4210.23	0.340827
GSM1854855	1076.12	1860.56	2936.69	0.509615
GSM1854853	1504.76	2344.26	3849.02	0.390172
GSM1854849	852.986	2177.61	3030.6	0.497706
GSM1854846	227.519	885.71	1113.23	0.719026
GSM1854841	-271.497	683.774	412.277	0.786605
GSM1854838	1339.47	1987.16	3326.63	0.459559
GSM1854831	-317.051	169.557	-147.494	0.834629
GSM1854830	902.555	350.653	1253.21	0.704595
GSM1854829	518.49	1788.36	2306.85	0.586872
GSM1854827	1004.52	2082.08	3086.6	0.49056
GSM1854825	510.055	1678.97	2189.03	0.600787
GSM1854823	-260.031	277.558	17.5266	0.821043
GSM1854822	-312.902	482.747	169.845	0.808076
GSM1854820	1572.22	3332.48	4904.7	0.243387
GSM1854818	1113.38	2992.88	4106.26	0.355134
GSM1854817	-382.159	-61.4238	-443.583	0.857773
GSM1854815	812.143	2597.11	3409.25	0.448754
GSM1854810	1244.42	2932.15	4176.57	0.345467
GSM1854805	883.874	1352.77	2236.64	0.595185
GSM1854802	566.44	1708.78	2275.22	0.590625
GSM1854799	1588.14	2696.72	4284.86	0.330508
GSM1672723	383.367	1727.11	2110.47	0.609965
GSM1672722	896.028	1282.31	2178.34	0.602041
GSM1672721	1098.03	1583.5	2681.53	0.541476
GSM1672720	38.3935	1753.76	1792.16	0.646312
GSM1672719	882.889	1980.24	2863.13	0.518876
GSM1672718	1033.82	1345.08	2378.9	0.578276
GSM1672717	801.173	1936.81	2737.98	0.534491
GSM1672716	1425.38	2082.33	3507.71	0.435792
GSM1672715	1354.73	2561.28	3916.02	0.381098
GSM1672714	1164.68	2402.37	3567.05	0.427936
GSM1672713	478.133	1849.53	2327.66	0.584396
GSM1672709	1316.03	2498.89	3814.92	0.394776
GSM1672708	773.013	1434.2	2207.21	0.598651
GSM1672707	787.715	2020.12	2807.84	0.525797
GSM1672706	406.244	1384.79	1791.03	0.646438
GSM1672702	1464.15	2598.83	4062.98	0.361066
GSM1672701	1004.19	2860	3864.18	0.388121
GSM1672699	1562.22	2914.44	4476.66	0.303809
GSM1672698	1779.65	2768.56	4548.22	0.293784
GSM1672697	769.641	1526.41	2296.05	0.588154
GSM1672696	797.942	1606.37	2404.31	0.575229
GSM1672694	1574.32	2990.39	4564.71	0.29147
GSM1672693	1084.78	2399.63	3484.42	0.438867
GSM1672692	744.442	2026.2	2770.64	0.530433
GSM1672689	1135.96	2464.96	3600.92	0.423436
GSM1672688	3.53002	800.911	804.441	0.749778
GSM1672685	-399.216	462.606	63.3894	0.817182
GSM1672684	813.263	1810.97	2624.23	0.548527
GSM1672683	89.4849	561.312	650.797	0.764509
GSM1672682	697.842	2292.19	2990.03	0.502863
GSM1672680	371.89	1655.14	2027.03	0.619625
GSM1672679	-233.736	1077.91	844.171	0.745906
GSM1672678	228.574	1801.7	2030.28	0.619251
GSM1672676	-241.769	640.007	398.238	0.787876
GSM1672675	-511.832	270.178	-241.654	0.842162
GSM1672672	-135.804	1007.19	871.389	0.743239
GSM1672671	1305.34	2187.87	3493.21	0.437707
GSM1672669	1276.57	3175.83	4452.4	0.307199
GSM1672668	321.453	1379.9	1701.35	0.656425
GSM1672667	216.577	826.55	1043.13	0.726139
GSM1672666	758.263	1572.04	2330.3	0.584082
GSM1672665	1156.64	2474.5	3631.14	0.419414
GSM1672663	-230.682	625.875	395.193	0.788151
GSM1672660	471.369	1937.3	2408.67	0.574706
GSM1672659	1473.31	2899.41	4372.72	0.318308
GSM1672658	573.097	1429.98	2003.08	0.62238
GSM1672657	662.368	1021.79	1684.16	0.658327
GSM1672652	205.203	1347.48	1552.68	0.672731
GSM1672649	-720.584	615.346	-105.237	0.831197
GSM1672648	-31.2256	1050.51	1019.28	0.728542
GSM1672647	1008.2	2595.8	3604.01	0.423026
GSM1672646	485.335	2500.39	2985.72	0.503409
GSM1672644	297.07	1059.34	1356.41	0.693766
GSM1672642	280.13	1436.05	1716.17	0.654782
GSM1672638	1217.41	1435.16	2652.57	0.545045
GSM1672635	210.264	1625.93	1836.19	0.641366
GSM1672634	-407.432	191.579	-215.853	0.840114
GSM1672633	944.086	2045.81	2989.89	0.50288
GSM1672632	-143.812	1067.01	923.2	0.73813
GSM1672630	1398.03	1880.01	3278.04	0.465882
GSM1672627	-196.024	336.203	140.179	0.810633
GSM1672625	1040.09	2501.39	3541.48	0.431325
GSM1672623	110.381	901.689	1012.07	0.729266
GSM1672621	829.472	1896.88	2726.36	0.535932
GSM1672620	164.51	1756.63	1921.14	0.63175
GSM1672614	240.622	744.637	985.26	0.731953
GSM1672611	1478.19	2039.62	3517.81	0.434458
GSM1672610	-21.3544	959.494	938.14	0.736649
GSM1672608	519.503	1543.86	2063.36	0.61543
GSM1672607	966.134	3091.61	4057.75	0.361783
GSM1672602	119.77	1426.51	1546.28	0.673426
GSM1672599	683.693	1975.55	2659.24	0.544224
GSM1672591	1438.74	2645.7	4084.44	0.358126
GSM1672590	905.691	2361.81	3267.5	0.46725
GSM1672589	476.818	1906.33	2383.15	0.577768
GSM1672585	-353.494	549.072	195.579	0.805845
GSM1672584	-463.047	-604.879	-1067.93	0.901216
GSM1672583	1364.5	1752.22	3116.72	0.486702
GSM1672582	1629.69	2144.27	3773.96	0.400292
GSM1672581	822.187	1764.12	2586.31	0.553173
GSM1672580	1644.59	2612.23	4256.82	0.334389
GSM1672578	968.011	2988.15	3956.16	0.375643
GSM1672577	1371.7	1334.53	2706.23	0.538424
GSM1672573	838.627	1386.11	2224.73	0.596589
GSM1672569	-87.8283	1637.79	1549.97	0.673026
GSM1672566	375.533	918.253	1293.79	0.700356
GSM1672558	307.894	1942.78	2250.67	0.593529
GSM1672555	1104.84	1435.74	2540.58	0.558753
GSM1672554	1297.95	2579.33	3877.27	0.386349
GSM1672551	575.506	2860.66	3436.17	0.445219
GSM1672550	57.2444	351.053	408.298	0.786966
GSM1672549	1048.85	2215.66	3264.51	0.467638
GSM1672546	413.589	1779.25	2192.84	0.60034
GSM1672545	-292.487	1276.87	984.381	0.732041
GSM1672544	1133.04	1465.45	2598.5	0.551683
GSM1672543	1063.57	2634.47	3698.04	0.410479
GSM1672540	1807.94	1558.93	3366.87	0.454305
GSM1672537	726.203	2285.2	3011.4	0.500148
GSM1672534	799.796	2811.2	3611	0.422096
GSM1672529	1482.47	2014.42	3496.89	0.437221
GSM1672518	905.693	1382.61	2288.3	0.589074
GSM1672515	-78.2488	245.813	167.564	0.808273
GSM1672512	1355.06	1862.76	3217.82	0.473685
GSM1672510	669.844	2848.95	3518.79	0.434327
GSM1672503	462.01	1048.43	1510.44	0.677306
GSM1672502	358.126	1610.35	1968.47	0.626349
GSM1672500	704.041	2294.82	2998.86	0.501742
GSM1672499	1027.39	1797.83	2825.22	0.523624
GSM1672494	984.451	2580.57	3565.02	0.428205
GSM1672493	1156.28	2094.27	3250.55	0.469449
GSM1672492	607.893	1877.53	2485.43	0.565449
GSM1672487	207.079	942.696	1149.77	0.715288
GSM1672486	1154.07	1503.74	2657.81	0.5444
GSM1672483	1075.95	2370.73	3446.68	0.443837
GSM1672479	1211.96	3328.58	4540.54	0.294862
GSM1672477	235.867	600.73	836.598	0.746646
GSM1672475	614.418	1747.07	2361.48	0.58036
GSM1672473	820.4	2085.84	2906.24	0.513456
GSM1672468	-167.225	936.378	769.152	0.753195
GSM1672467	662.263	2383.3	3045.56	0.4958
GSM1672463	589.924	2013.67	2603.59	0.551059
GSM1672457	55.2692	1196.53	1251.8	0.704742
GSM1672456	839.812	1755.12	2594.93	0.552119
GSM1672455	1013.68	790.477	1804.15	0.644967
GSM1672454	-63.6996	1129.44	1065.74	0.723853
GSM1672453	1529.58	2064.01	3593.59	0.424412
GSM1672452	315.959	548.463	864.421	0.743923
GSM1672450	629.277	2659.01	3288.29	0.46455
GSM1672449	1636.2	3434.96	5071.17	0.219616
GSM1672447	341.065	1467.16	1808.23	0.64451
GSM1672444	-273.202	1489.2	1216	0.708461
GSM1672442	1551.57	2855.22	4406.8	0.313563
GSM1672440	375.561	1373.56	1749.12	0.651119
GSM1672439	-34.3712	1068.86	1034.49	0.727011
GSM1672438	989.638	1989.33	2978.97	0.504265
GSM1672437	536.908	1910.13	2447.04	0.570087
GSM1672436	316.444	1643.25	1959.7	0.627352
GSM1672435	302.382	2272.53	2574.91	0.554567
GSM1672434	479.845	2215.99	2695.84	0.539709
GSM1672433	582.685	1109.05	1691.73	0.65749
GSM1672432	-185.866	956.319	770.453	0.75307
GSM1672426	601.843	2362.8	2964.65	0.50608
GSM1672422	204.082	1796.15	2000.23	0.622708
GSM1672421	803.272	1855.01	2658.28	0.544342
GSM1672419	2062.61	3057.36	5119.97	0.212621
GSM1672418	870.646	1841.36	2712.01	0.537709
GSM1672417	1354.8	2524.65	3879.45	0.386055
GSM1672416	1331.51	2776.65	4108.16	0.354874
GSM1672414	1326.19	2459.16	3785.35	0.398759
GSM1672413	1611.93	2750.48	4362.41	0.319743
GSM1672412	1680.92	2854.64	4535.56	0.29556
GSM1672411	525.057	2440.05	2965.11	0.506021
GSM1672410	2009.32	2813.13	4822.45	0.255079
GSM1672408	-358.55	776.612	418.062	0.786081
GSM1672404	1151.13	3275.01	4426.14	0.310865
GSM1672402	781.814	2360.53	3142.35	0.483413
GSM1672401	1110.31	3184.15	4294.46	0.329177
GSM1672399	876.787	2179.07	3055.86	0.494487
GSM1672397	1609.96	2463.65	4073.61	0.35961
GSM1672395	1301.58	2100.47	3402.05	0.449699
GSM1672393	456.665	2209.61	2666.27	0.543358
GSM1672392	903.02	2044.3	2947.32	0.508272
GSM1672391	1568.43	2654.94	4223.37	0.339013
GSM1672390	979.524	1100.11	2079.63	0.613546
GSM1672388	1348.68	2349.03	3697.7	0.410524
GSM1672385	1196.64	2524.69	3721.34	0.407359
GSM1672383	1279.12	2785.93	4065.05	0.360782
GSM1672380	1320.54	2472.79	3793.33	0.397685
GSM1672378	1344.98	2328.1	3673.08	0.413818
GSM1672377	-174.642	28.5944	-146.047	0.834512
GSM1672376	1151.25	2792.92	3944.17	0.377274
GSM1672375	606.068	1531.79	2137.86	0.606774
GSM1672370	651.924	1541.42	2193.35	0.60028
GSM1672368	128.83	492.701	621.531	0.767271
GSM1672367	2055.93	3507.95	5563.88	0.148544
GSM1672364	987.897	1928.48	2916.38	0.512178
GSM1672362	428.593	516.06	944.652	0.736002
GSM1672356	-271.658	2028.15	1756.49	0.650298
GSM1672355	1214.53	2592.58	3807.11	0.395828
GSM1672353	295.392	1414.24	1709.64	0.655507
GSM1672350	1260.14	2575.08	3835.22	0.392036
GSM1672348	1453.19	2628.03	4081.22	0.358568
GSM1672346	-196.385	-194.509	-390.894	0.853772
GSM1672345	1588.71	2482.74	4071.45	0.359906
GSM1672342	1653.87	2467.13	4121.01	0.35311
GSM1672341	1433.49	2489.47	3922.96	0.380155
GSM1672340	908.457	1839.96	2748.42	0.533196
GSM1672338	1261.96	2897.2	4159.17	0.347864
GSM1672336	521.237	2092.55	2613.78	0.549809
GSM1672334	1195.08	2846.67	4041.75	0.363971
GSM1672332	938.089	2552.39	3490.48	0.438067
GSM1672331	817.065	2154.14	2971.21	0.505249
GSM1672329	899.181	2108.77	3007.95	0.500587
GSM1672324	1468.91	2467.14	3936.05	0.378377
GSM1672323	1889.63	2671.25	4560.89	0.292006
GSM1672318	1052.06	1765.66	2817.73	0.524561
GSM1672317	304.743	2168.29	2473.03	0.566949
GSM1672315	-280.639	846.104	565.465	0.772523
GSM1672314	1365.67	3099.03	4464.7	0.30548
GSM1672313	323.861	1368.83	1692.69	0.657384
GSM1672311	1471.51	3599.03	5070.55	0.219705
GSM1672310	734.58	1609.32	2343.9	0.58246
GSM1672309	809.744	1363.51	2173.25	0.602637
GSM1672308	1096.21	1966.18	3062.39	0.493654
GSM1672307	290.636	1726.93	2017.57	0.620715
GSM1672306	1624.78	2509.63	4134.41	0.351268
GSM1672305	1890	1042.43	2932.43	0.510153
GSM1672304	1060.98	2848.2	3909.18	0.382026
GSM1672303	315.646	1363.4	1679.05	0.658892
GSM1672302	623.681	2176.6	2800.28	0.52674
GSM1672299	697.59	2959.62	3657.21	0.415937
GSM1672297	771.94	1894.94	2666.88	0.543282
GSM1672296	-77.308	505.813	428.505	0.785132
TCGA-S2-AA1A	1453.95	2812.82	4266.77	0.333012
TCGA-O1-A52J	343.909	2103	2446.91	0.570103
TCGA-NJ-A55R	259.885	795.236	1055.12	0.724928
TCGA-NJ-A55O	450.346	1839.35	2289.69	0.588909
TCGA-NJ-A55A	1022.72	2431.36	3454.07	0.442865
TCGA-NJ-A4YQ	649.136	2901.97	3551.11	0.430049
TCGA-NJ-A4YI	721.7	1696.45	2418.15	0.573567
TCGA-NJ-A4YG	850.315	1967.81	2818.13	0.524511
TCGA-MP-A5C7	-498.932	261.949	-236.983	0.841793
TCGA-MP-A4TJ	1569.86	3333.8	4903.66	0.243535
TCGA-MP-A4TH	828.068	2664.85	3492.92	0.437745
TCGA-MP-A4TE	-615.355	140.034	-475.321	0.860159
TCGA-MP-A4TD	1445.95	1832.02	3277.97	0.465891
TCGA-MP-A4T6	-453.158	1796.8	1343.64	0.695114
TCGA-MP-A4SW	667.466	2207.45	2874.91	0.517396
TCGA-L9-A7SV	-403.3	607.107	203.807	0.805129
TCGA-L9-A50W	303.437	1537.62	1841.06	0.640818
TCGA-L9-A444	1180.62	3102.61	4283.23	0.330733
TCGA-L9-A443	831.554	1546.05	2377.61	0.578431
TCGA-L4-A4E6	1598.1	2992.79	4590.89	0.287792
TCGA-J2-A4AG	1139.4	2354.87	3494.26	0.437568
TCGA-J2-A4AE	226.922	2017.01	2243.93	0.594325
TCGA-99-AA5R	1548.2	3148.06	4696.26	0.272945
TCGA-99-8032	1197.98	1412.55	2610.53	0.550208
TCGA-99-8028	1893.09	3346.7	5239.79	0.195403
TCGA-99-8025	716.063	1117.07	1833.13	0.641711
TCGA-99-7458	1470.33	2551.89	4022.22	0.366638
TCGA-97-A4M7	1094.25	2632.93	3727.18	0.406575
TCGA-97-A4M6	1053.44	2638.21	3691.65	0.411335
TCGA-97-A4M5	1261.53	2175.33	3436.86	0.445129
TCGA-97-A4M3	648.507	842.602	1491.11	0.67939
TCGA-97-A4M2	1049.5	2946.52	3996.01	0.370215
TCGA-97-A4M1	730.022	2033.84	2763.87	0.531276
TCGA-97-A4M0	316.773	2464.8	2781.58	0.529071
TCGA-97-A4LX	1670.4	3163.5	4833.9	0.253453
TCGA-97-8552	719.803	2331.83	3051.63	0.495026
TCGA-97-8177	1624.91	2486.95	4111.86	0.354366
TCGA-97-8172	1516.82	2610.56	4127.38	0.352234
TCGA-97-8171	-587.646	336.594	-251.052	0.842906
TCGA-97-7941	811.232	1683.13	2494.36	0.564367
TCGA-97-7938	683.515	1339.03	2022.54	0.620142
TCGA-97-7937	357.101	749.537	1106.64	0.719698
TCGA-97-7554	1605.85	1817.78	3423.63	0.446867
TCGA-97-7553	1520.02	3190.36	4710.39	0.270949
TCGA-97-7552	1101.47	3133.56	4235.03	0.337402
TCGA-97-7547	753.182	1496.79	2249.97	0.593612
TCGA-97-7546	1361.1	2213.47	3574.57	0.426938
TCGA-95-A4VP	864.61	2074.69	2939.3	0.509285
TCGA-95-8039	727.692	2366.03	3093.73	0.489648
TCGA-93-A4JN	921.42	1759.82	2681.24	0.541512
TCGA-93-7348	1178.02	1718.7	2896.72	0.514654
TCGA-93-7347	1539.61	3029.12	4568.74	0.290904
TCGA-91-A4BD	100.232	2277.54	2377.77	0.578411
TCGA-91-A4BC	1514.78	3021.92	4536.71	0.295399
TCGA-91-8497	1219.88	2548.27	3768.15	0.401074
TCGA-91-8496	781.083	2500.98	3282.07	0.465359
TCGA-91-7771	1336.85	2569.83	3906.68	0.382365
TCGA-91-6849	697.303	2167.95	2865.25	0.518609
TCGA-91-6840	397.677	1680.11	2077.79	0.61376
TCGA-91-6835	1570.08	3249.91	4819.99	0.255428
TCGA-91-6829	1718.87	1202.55	2921.42	0.511543
TCGA-91-6828	1141.15	2480.92	3622.07	0.420623
TCGA-86-A4P8	1621.12	3300.28	4921.4	0.241008
TCGA-86-A4P7	1235.48	2514.24	3749.73	0.403549
TCGA-86-A456	875.644	2134.98	3010.62	0.500247
TCGA-86-8671	2040.49	3595.06	5635.55	0.138133
TCGA-86-8669	306.827	1744.83	2051.66	0.616783
TCGA-86-8668	1407.66	2018.56	3426.23	0.446526
TCGA-86-8280	1401.93	2580.37	3982.3	0.372084
TCGA-86-8279	905.598	941.261	1846.86	0.640164
TCGA-86-8076	901.045	2814.02	3715.07	0.408199
TCGA-86-8073	1066.93	1530.73	2597.66	0.551785
TCGA-86-8056	630.556	1782.85	2413.4	0.574137
TCGA-86-7954	1024.98	2659.76	3684.74	0.412258
TCGA-86-7714	639.448	1686.63	2326.07	0.584585
TCGA-86-6851	881.898	3153.97	4035.87	0.364774
TCGA-78-8648	2449.14	3230.2	5679.34	0.131764
TCGA-78-8640	-159.533	1525.69	1366.15	0.692734
TCGA-78-7633	112.716	519.551	632.267	0.76626
TCGA-78-7540	-127.191	1275	1147.81	0.715489
TCGA-78-7539	393.674	2491.93	2885.61	0.516052
TCGA-78-7537	679.592	1144.59	1824.19	0.642717
TCGA-78-7535	512.744	1967.87	2480.62	0.566031
TCGA-78-7167	-85.7391	405.317	319.578	0.794934
TCGA-78-7163	-1264	560.767	-703.235	0.876737
TCGA-78-7162	1015.65	2082.98	3098.63	0.48902
TCGA-78-7161	237.356	390.853	628.209	0.766642
TCGA-78-7159	649.838	1194.5	1844.34	0.640448
TCGA-78-7158	-96.1795	886.613	790.434	0.751137
TCGA-78-7156	-121.674	651.507	529.833	0.775834
TCGA-78-7155	-640.264	158.928	-481.336	0.860609
TCGA-78-7153	-46.5229	964.858	918.335	0.738611
TCGA-78-7152	547.237	1958.49	2505.73	0.562988
TCGA-78-7149	474.847	798.795	1273.64	0.702464
TCGA-78-7143	-46.8641	1700.67	1653.81	0.661674
TCGA-75-7025	1131.29	2184.45	3315.73	0.460979
TCGA-75-6212	783.126	2345.24	3128.37	0.485208
TCGA-75-6206	864.519	1478.91	2343.43	0.582516
TCGA-75-5146	640.383	1966.49	2606.87	0.550657
TCGA-73-7498	1010.38	1722.2	2732.59	0.53516
TCGA-73-4668	692.594	1070.51	1763.1	0.649561
TCGA-73-4662	827.468	2297.9	3125.36	0.485594
TCGA-73-4658	1936.81	2683	4619.81	0.283723
TCGA-71-8520	1070.5	1211.56	2282.07	0.589814
TCGA-71-6725	-287.013	898.706	611.693	0.768197
TCGA-69-8453	1106.05	2964.99	4071.04	0.359963
TCGA-69-8255	-264.892	2315.76	2050.87	0.616875
TCGA-69-8254	242.959	2014.36	2257.32	0.592743
TCGA-69-7765	1730.78	2029.83	3760.62	0.402086
TCGA-69-7764	280.025	1294.8	1574.83	0.670322
TCGA-69-7761	1047.67	2760.85	3808.52	0.395638
TCGA-67-6217	785.063	2206.18	2991.24	0.502709
TCGA-67-6216	378.543	2187.99	2566.54	0.555589
TCGA-67-4679	1145.04	2071.38	3216.42	0.473867
TCGA-67-3773	1160.53	2414.05	3574.59	0.426936
TCGA-67-3772	1522.82	2049.64	3572.47	0.427217
TCGA-67-3770	663.244	2092.86	2756.11	0.53224
TCGA-64-5779	913.866	1745.95	2659.81	0.544153
TCGA-64-5778	273.828	2675.16	2948.99	0.508061
TCGA-64-1681	834.904	1871.26	2706.16	0.538432
TCGA-64-1676	1188.49	2352.23	3540.72	0.431425
TCGA-62-A470	61.1245	1064.02	1125.15	0.717809
TCGA-62-A46U	639.374	3301.44	3940.81	0.37773
TCGA-62-A46S	345.164	1592.72	1937.89	0.629842
TCGA-62-A46R	660.525	2142.94	2803.47	0.526342
TCGA-62-A46P	109.379	924.446	1033.83	0.727078
TCGA-62-8402	-66.5472	2291.87	2225.32	0.596519
TCGA-62-8397	466.62	1753.15	2219.77	0.597174
TCGA-62-8395	986.021	1168.05	2154.07	0.604881
TCGA-55-A4DG	219.414	1854.87	2074.29	0.614165
TCGA-55-A4DF	257.515	2202.49	2460	0.568523
TCGA-55-A494	-803.017	-317.685	-1120.7	0.904547
TCGA-55-A492	68.7421	1092.19	1160.94	0.714142
TCGA-55-A491	827.541	2031.21	2858.75	0.519425
TCGA-55-A48Z	1227.18	1763.95	2991.13	0.502723
TCGA-55-8621	1734.84	2971.76	4706.6	0.271485
TCGA-55-8620	-427.79	1448.92	1021.13	0.728355
TCGA-55-8619	1299.61	3034.41	4334.03	0.323688
TCGA-55-8616	314.547	1284.91	1599.46	0.667635
TCGA-55-8514	231.948	1463.14	1695.09	0.657119
TCGA-55-8513	1207.56	2590.87	3798.43	0.396999
TCGA-55-8512	174.798	1245.92	1420.72	0.686936
TCGA-55-8510	1335.7	2743.88	4079.58	0.358792
TCGA-55-8507	438.538	1250.18	1688.72	0.657823
TCGA-55-8506	661.733	1649.97	2311.7	0.586295
TCGA-55-8301	1310.4	3007.22	4317.61	0.325966
TCGA-55-8208	1828.43	3249.93	5078.36	0.218586
TCGA-55-8207	1600.13	2098.26	3698.39	0.410433
TCGA-55-8206	1032.48	2676.51	3708.99	0.409013
TCGA-55-8097	704.811	1646.05	2350.86	0.581629
TCGA-55-8096	1554.76	2099.5	3654.26	0.416331
TCGA-55-8091	1563.66	2286.12	3849.79	0.390068
TCGA-55-8087	311.228	1130.88	1442.11	0.684651
TCGA-55-8085	494.481	2310.86	2805.34	0.526108
TCGA-55-7995	609.805	2873.07	3482.88	0.43907
TCGA-55-7914	491.678	1712.11	2203.78	0.599054
TCGA-55-7910	237.022	963.067	1200.09	0.710107
TCGA-55-7907	938.651	2133.76	3072.41	0.492373
TCGA-55-7816	2113.97	2528.14	4642.11	0.280583
TCGA-55-7815	1414.02	2065.92	3479.94	0.439457
TCGA-55-7728	420.12	3065.56	3485.68	0.438701
TCGA-55-7727	322.63	1931.84	2254.47	0.59308
TCGA-55-7725	400.676	2362.19	2762.86	0.531401
TCGA-55-7576	916.54	1812.86	2729.41	0.535554
TCGA-55-7573	913.742	2247.04	3160.78	0.481042
TCGA-55-7284	994.708	2098.88	3093.58	0.489666
TCGA-55-7283	474.173	1777.39	2251.56	0.593424
TCGA-55-7281	1277.79	2426.89	3704.68	0.409591
TCGA-55-7227	1371.22	2441.48	3812.71	0.395073
TCGA-55-6987	1206.7	3296.25	4502.95	0.30013
TCGA-55-6983	1133.11	2317.98	3451.1	0.443256
TCGA-55-6972	-1204.01	-37.2779	-1241.29	0.911951
TCGA-55-6971	1277.53	3092.84	4370.37	0.318636
TCGA-55-6969	1409.57	2499.27	3908.84	0.382071
TCGA-55-6642	1852.08	2011.33	3863.41	0.388226
TCGA-55-6543	736.489	1836.92	2573.41	0.55475
TCGA-55-1594	129.218	1408.23	1537.44	0.674384
TCGA-55-1592	657.793	1639	2296.8	0.588066
TCGA-53-A4EZ	-438.047	741.636	303.588	0.796356
TCGA-53-7813	-261.641	1349.75	1088.11	0.721584
TCGA-53-7626	1401.96	2888.18	4290.14	0.329777
TCGA-50-8460	916.421	2414.73	3331.16	0.458969
TCGA-50-8457	1399.17	2621.78	4020.95	0.366813
TCGA-50-7109	825.086	1783.09	2608.17	0.550497
TCGA-50-6673	968.184	1539.06	2507.24	0.562805
TCGA-50-6597	265.639	1991.49	2257.13	0.592765
TCGA-50-6593	1432.82	1952.13	3384.95	0.451938
TCGA-50-6592	943.214	2349.34	3292.55	0.463996
TCGA-50-5944	1324.96	1396.6	2721.57	0.536526
TCGA-50-5942	713.019	1437.92	2150.94	0.605247
TCGA-50-5935	752.237	1927.08	2679.32	0.541749
TCGA-50-5068	1246.11	2758.83	4004.94	0.368998
TCGA-50-5055	1945.23	3233.59	5178.82	0.204173
TCGA-50-5051	-4.56813	773.422	768.854	0.753224
TCGA-50-5049	2148.5	3386.91	5535.42	0.152675
TCGA-4B-A93V	-215.915	1359.27	1143.36	0.715945
TCGA-49-AARR	1187.22	2340.13	3527.34	0.433196
TCGA-49-AARQ	-445.248	1610.17	1164.92	0.713732
TCGA-49-AARO	1289.83	2665.52	3955.36	0.375752
TCGA-49-AAR2	-55.6191	1743.37	1687.75	0.65793
TCGA-49-AAR0	620.765	2224.28	2845.04	0.521143
TCGA-49-4514	-31.3463	1691.21	1659.86	0.661008
TCGA-49-4512	1376.95	1781.97	3158.92	0.481282
TCGA-49-4510	386.288	1169.82	1556.1	0.672359
TCGA-49-4505	1174.25	2468.6	3642.85	0.417853
TCGA-49-4501	1157.92	2118.69	3276.61	0.466068
TCGA-49-4488	308.478	1895.51	2203.99	0.59903
TCGA-49-4487	1215.52	2683.8	3899.32	0.383363
TCGA-44-A4SU	470.105	1569.09	2039.19	0.618222
TCGA-44-A47G	1434.08	2982.33	4416.41	0.312223
TCGA-44-A47B	437.892	1733.77	2171.66	0.602823
TCGA-44-A479	1463.02	2972.81	4435.83	0.309513
TCGA-44-8120	1113.08	1553.68	2666.76	0.543297
TCGA-44-8119	1555.86	1746.8	3302.66	0.462681
TCGA-44-7659	136.384	1525.06	1661.45	0.660833
TCGA-44-6778	1368.99	3283.82	4652.81	0.279075
TCGA-44-6777	2427.99	2972.84	5400.83	0.172168
TCGA-44-6776	-102.684	614.579	511.895	0.777493
TCGA-44-6775	1941.11	2164.3	4105.41	0.355251
TCGA-44-6774	2448.54	1968.91	4417.45	0.312077
TCGA-44-6148	1177.15	1680.62	2857.77	0.519548
TCGA-44-6147	1458.11	1967.51	3425.62	0.446605
TCGA-44-6146	115.591	545.86	661.451	0.7635
TCGA-44-5645	993.97	2307.5	3301.47	0.462835
TCGA-44-3919	1199.09	2587.26	3786.35	0.398624
TCGA-44-3918	1711.79	2757.37	4469.16	0.304857
TCGA-44-3917	607.444	1579.58	2187.03	0.601022
TCGA-44-2666	244.511	798.313	1042.82	0.72617
TCGA-44-2661	1673.94	3197.56	4871.5	0.24811
TCGA-44-2659	1303.67	2233.15	3536.82	0.431942
TCGA-44-2657	1397.17	3165.7	4562.87	0.291728
TCGA-44-2656	1389.33	2744.59	4133.93	0.351335
TCGA-44-2655	472.86	1847.36	2320.22	0.585281
TCGA-38-A44F	1190.62	2772.75	3963.37	0.374663
TCGA-38-7271	1797.67	3320.93	5118.6	0.212817
TCGA-38-4626	1679.16	2620.28	4299.44	0.328487
TCGA-05-5715	1142.06	1726.77	2868.83	0.51816
TCGA-05-5428	847.712	1666.35	2514.06	0.561977
TCGA-05-5423	859.859	2550.98	3410.84	0.448545
TCGA-05-5420	1256.52	3173.12	4429.63	0.310378
TCGA-05-4433	415.502	2399.52	2815.02	0.524899
TCGA-05-4432	572.878	1909.05	2481.93	0.565872
TCGA-05-4430	1809.21	2257.93	4067.15	0.360496
TCGA-05-4427	766.751	1765.8	2532.55	0.55973
TCGA-05-4426	222.597	1609.96	1832.56	0.641775
TCGA-05-4424	1254.26	2067.86	3322.12	0.460147
TCGA-05-4422	67.4848	2336.07	2403.56	0.57532
TCGA-05-4417	1947.95	2545.2	4493.15	0.301501
TCGA-05-4405	1548.87	1704.26	3253.14	0.469113
TCGA-05-4403	817.867	2143.38	2961.25	0.50651
TCGA-05-4389	357.747	2435.53	2793.28	0.527613
TCGA-05-4384	730.621	1739.92	2470.54	0.56725
TCGA-05-4382	1732.89	2470.83	4203.73	0.341724
TCGA-05-4249	766.897	1916.06	2682.96	0.541299
GSM773765	901.823	2158.84	3060.66	0.493874
GSM773763	662.675	2058.21	2720.89	0.53661
GSM773762	128.464	753.735	882.199	0.742177
GSM773761	1222.84	2364.67	3587.5	0.425221
GSM773760	759.551	1964.57	2724.12	0.536209
GSM773759	39.1973	334.263	373.46	0.790111
GSM773758	659.054	1807.98	2467.04	0.567673
GSM773757	523.16	1402.82	1925.98	0.631198
GSM773755	-83.4177	796.357	712.939	0.758598
GSM773753	440.995	2051.5	2492.49	0.564593
GSM773752	-210.413	351.224	140.811	0.810579
GSM773750	1074.33	2261.43	3335.77	0.458367
GSM773748	435.72	2183.6	2619.32	0.54913
GSM773747	-442.294	127.71	-314.584	0.847887
GSM773746	650.254	2639.59	3289.85	0.464347
GSM773744	277.249	1015.73	1292.98	0.700441
GSM773739	415.055	988.328	1403.38	0.688783
GSM773738	-876.895	661.886	-215.009	0.840047
GSM773737	365.977	2252.92	2618.89	0.549183
GSM773735	242.77	1453.59	1696.36	0.656978
GSM773734	1091	2533.58	3624.57	0.420289
GSM773733	-195.446	1576	1380.56	0.691208
GSM773732	-86.6636	1346.45	1259.78	0.70391
GSM773731	549.597	1914.55	2464.15	0.568022
GSM773728	1250.33	1720.15	2970.48	0.505341
GSM773726	695.557	1789.88	2485.44	0.565448
GSM773721	993.266	2358.93	3352.19	0.456223
GSM773719	1267.76	1587.07	2854.84	0.519915
GSM773714	-608.502	971.547	363.045	0.791047
GSM773713	874.954	1789.13	2664.09	0.543627
GSM773712	339.059	977.562	1316.62	0.69796
GSM773711	1238.41	2574.79	3813.2	0.395007
GSM773710	273.939	1765.11	2039.05	0.618239
GSM773709	1224.07	2789.42	4013.5	0.36783
GSM773708	-593.369	130.105	-463.263	0.859255
GSM773707	869.989	2034.71	2904.7	0.513649
GSM773706	576.137	1341.97	1918.1	0.632095
GSM773705	1144.17	2515.45	3659.62	0.415615
GSM773704	527.382	2543.2	3070.58	0.492607
GSM773701	1407.73	2221.58	3629.31	0.419658
GSM773699	130.331	1409.86	1540.19	0.674087
GSM773698	75.2822	1147.25	1222.54	0.707783
GSM773696	134.359	1199.75	1334.11	0.696119
GSM773695	1960.01	2176.82	4136.83	0.350936
GSM773693	634.866	1713.8	2348.67	0.581891
GSM773691	194.073	1102.57	1296.64	0.700057
GSM773690	348.398	1651.02	1999.42	0.622801
GSM773689	834.519	1587.05	2421.57	0.573155
GSM773688	1083.78	2207.39	3291.17	0.464176
GSM773687	1344.28	1620.86	2965.14	0.506017
GSM773686	1232.42	1782.58	3015	0.499691
GSM773685	361.884	1552.07	1913.95	0.632567
GSM773684	318.111	1516.86	1834.97	0.641504
GSM773682	907.33	1295.3	2202.63	0.59919
GSM773681	1507.66	2190.21	3697.87	0.410502
GSM773680	663.981	2061.8	2725.78	0.536003
GSM773671	1486.49	2411.08	3897.57	0.3836
GSM773670	1572.34	1713.44	3285.78	0.464876
GSM773668	-488.148	582.545	94.3963	0.81455
GSM773667	498.214	2664.65	3162.87	0.480774
GSM773664	-24.3983	1625.08	1600.68	0.667501
GSM773663	601.302	1521.93	2123.23	0.608479
GSM773662	1404.44	2864.82	4269.25	0.332669
GSM773657	1368.04	2428.97	3797.01	0.397189
GSM773654	1330.91	2830.58	4161.5	0.347543
GSM773653	984.735	2314.45	3299.18	0.463134
GSM773652	491.906	2015.2	2507.11	0.562821
GSM773648	1425.78	1651.81	3077.6	0.491711
GSM773642	-564.592	1273.95	709.361	0.75894
GSM773638	1141.29	1508.81	2650.1	0.545349
GSM773637	739.593	2002.18	2741.77	0.534021
GSM773635	1216.6	3018.39	4234.99	0.337408
GSM773634	630.445	2554.96	3185.41	0.47787
GSM773632	433.337	850.835	1284.17	0.701363
GSM773631	153.016	896.306	1049.32	0.725514
GSM773629	2139.52	3227.69	5367.21	0.177027
GSM773625	1877.01	2745.95	4622.96	0.28328
GSM773624	306.901	910.525	1217.43	0.708313
GSM773623	572.006	1458.49	2030.49	0.619226
GSM773622	1156.15	2090.14	3246.29	0.47
GSM773620	1179.95	1841.96	3021.91	0.498813
GSM773619	1616.05	2124.56	3740.6	0.404774
GSM773618	451.695	1500.47	1952.17	0.628212
GSM773615	-937.528	532.949	-404.579	0.854816
GSM773614	997.33	1711.54	2708.87	0.538097
GSM773612	1834.48	3204.16	5038.63	0.224272
GSM773611	630.496	2560.93	3191.43	0.477094
GSM773609	1163.57	1856.61	3020.18	0.499033
GSM773608	1342.11	1584.99	2927.09	0.510826
GSM773607	1222.72	2843	4065.72	0.360691
GSM773606	1255.9	2245.64	3501.53	0.436608
GSM773602	1470.98	2242.57	3713.55	0.408402
GSM773596	1552.23	2677.63	4229.86	0.338116
GSM773595	700.048	1824.72	2524.77	0.560677
GSM773594	1160.86	1995.15	3156.01	0.481656
GSM773569	-61.1574	2136.47	2075.31	0.614046
GSM773567	1077.29	2847.99	3925.28	0.37984
GSM773564	228.18	1970.89	2199.07	0.599608
GSM773561	798.107	2143.2	2941.3	0.509032
GSM773554	-732.148	510.407	-221.741	0.840583
GSM773553	-412.942	352.633	-60.3097	0.827512
GSM773549	594.459	2210.42	2804.88	0.526165
GSM1855236	1120.61	2873.51	3994.13	0.370473
GSM1855229	1312.93	2834.65	4147.59	0.349457
GSM1855223	509.744	1950.35	2460.09	0.568512
GSM1855222	1232.03	2936.84	4168.87	0.346528
GSM1855221	778.14	2634.8	3412.94	0.44827
GSM1855219	930.093	1141.69	2071.78	0.614456
GSM1855218	952.617	1958.9	2911.51	0.512791
GSM1855217	1098.17	1402.33	2500.49	0.563623
GSM1855215	314.658	2266.46	2581.12	0.553808
GSM1855214	1253.92	1866.65	3120.57	0.486208
GSM1855213	-76.7774	1164.27	1087.49	0.721646
GSM1855212	771.754	2723.76	3495.51	0.437403
GSM1855210	386.262	2273.22	2659.48	0.544194
GSM1855209	-987.481	-826.651	-1814.13	0.94319
GSM1855208	966.793	2952.22	3919.01	0.380691
GSM1855200	52.2256	970.17	1022.4	0.728228
GSM1855195	985.122	969.543	1954.67	0.627927
GSM1855192	1278	1628.2	2906.2	0.513461
GSM1855188	1358.77	1803.28	3162.05	0.480879
GSM1855187	-1242.64	-431.65	-1674.29	0.936171
GSM1855183	1258.36	2660.76	3919.11	0.380677
GSM1855182	612.574	1588.19	2200.76	0.599409
GSM1855177	795.198	3100.25	3895.45	0.383887
GSM1855174	966.732	2037.24	3003.97	0.501093
GSM1855172	1174.13	2301.11	3475.24	0.440077
GSM1855170	440.744	1496.32	1937.06	0.629936
GSM1855169	1483.59	2437.88	3921.47	0.380358
GSM1855165	83.2199	794.455	877.674	0.742622
GSM1855164	1449.51	1542.55	2992.07	0.502604
GSM1855163	819.726	2151.08	2970.81	0.505299
GSM1855162	817.625	2211.21	3028.83	0.497931
GSM1855159	310.434	1684.53	1994.97	0.623312
GSM1855158	-485.401	1359.68	874.275	0.742956
GSM1855152	549.984	2352.93	2902.92	0.513874
GSM1855151	-195.448	1025.63	830.178	0.747273
GSM1855149	1880.27	2248.47	4128.73	0.352049
GSM1855143	737.309	2633.58	3370.89	0.453779
GSM1855141	650.947	1588.42	2239.37	0.594863
GSM1855134	1293.88	2661.97	3955.85	0.375686
GSM1855133	1458.78	2565.71	4024.49	0.366329
GSM1855129	1409.14	2602.09	4011.23	0.368139
GSM1855127	1845.16	2630.12	4475.28	0.304001
GSM1855126	-44.1502	602.837	558.687	0.773155
GSM1855124	339.533	987.432	1326.97	0.696871
GSM1855119	590.615	1065.68	1656.3	0.6614
GSM1855113	921.551	1934.88	2856.43	0.519716
GSM1855112	1571.55	2499.52	4071.08	0.359958
GSM1855111	-901.921	815.309	-86.6122	0.829674
GSM1855110	1177.47	3087.48	4264.95	0.333265
GSM1855106	1486.49	2598.31	4084.8	0.358077
GSM1855105	1760.07	2563.08	4323.16	0.325197
GSM1855104	-931.985	679.56	-252.425	0.843014
GSM1855102	995.161	3166.42	4161.58	0.347532
GSM1855100	399.439	1297.69	1697.13	0.656893
GSM1855099	-229.616	584.448	354.832	0.791784
GSM1855098	1350.52	2347.51	3698.03	0.41048
GSM1855093	1180.04	3188.66	4368.71	0.318867
GSM1855092	1482.06	2523.18	4005.24	0.368957
GSM1855091	1072.92	2672.32	3745.23	0.404153
GSM1855088	-740.119	1157.47	417.348	0.786145
GSM1855087	886.154	2258.82	3144.97	0.483076
GSM1855086	460.204	2008.6	2468.81	0.567459
GSM1855082	1147.59	2693.64	3841.24	0.391223
GSM1855081	1008.87	1931.63	2940.5	0.509134
GSM1855080	1644.69	2302.21	3946.9	0.376903
GSM1855077	1204.92	1294.95	2499.87	0.563699
GSM1855076	1386.15	3124.64	4510.79	0.299032
GSM1855075	726.266	1618.53	2344.79	0.582354
GSM1855074	115.623	1072.36	1187.99	0.711357
GSM1855072	1488.29	2755.51	4243.79	0.336191
GSM1855071	486.217	2454	2940.21	0.50917
GSM1855070	990.473	2465.2	3455.67	0.442654
GSM1855069	346.505	1644.24	1990.75	0.623796
GSM1855067	170.991	1500.98	1671.97	0.659673
GSM1855063	797.672	2412.63	3210.3	0.474657
GSM1855061	1088.86	2644.22	3733.08	0.405783
GSM1855059	592.788	1566.57	2159.36	0.604263
GSM1855057	1118.47	1892.22	3010.69	0.500239
GSM1855056	-883.625	94.858	-788.767	0.882707
GSM1855055	1308	3315.05	4623.05	0.283267
GSM1855054	396.186	1616.3	2012.48	0.6213
GSM1855053	728.43	1801.24	2529.67	0.56008
GSM1855052	1840.03	2968.01	4808.04	0.257124
GSM1855048	-1671.63	-864.668	-2536.3	0.97305
GSM1855046	16.7826	885.701	902.484	0.740178
GSM1855044	819.198	1664.75	2483.94	0.565628
GSM1855041	852.301	2494.13	3346.43	0.456975
GSM1855040	1042.79	2305.32	3348.1	0.456757
GSM1855036	981.052	2783.86	3764.92	0.401508
GSM1855035	1406.59	2865.18	4271.77	0.332321
GSM1855034	689.87	1558.23	2248.1	0.593833
GSM1855031	1546.61	2964.37	4510.99	0.299004
GSM1855015	85.3609	1298.4	1383.76	0.690868
GSM1855011	854.78	2616.18	3470.96	0.440641
GSM1855010	2252.73	3150.85	5403.58	0.171771
GSM1855008	529.966	1991.09	2521.06	0.561128
GSM1855007	241.777	2391.23	2633.01	0.54745
GSM1855005	2024.96	3418.64	5443.6	0.16598
GSM1855004	1476.07	2463.22	3939.29	0.377937
GSM1855003	1852.84	2804.44	4657.28	0.278444
GSM1854999	654.936	2707.64	3362.57	0.454866
GSM1854996	-316.499	1567.5	1251	0.704825
GSM1854994	892.942	2823.91	3716.85	0.40796
GSM1854990	553.066	2259.6	2812.66	0.525194
GSM1854989	544.837	1742.82	2287.65	0.589151
GSM1854988	610.193	2284.73	2894.92	0.514881
GSM1854987	655.681	1532.43	2188.11	0.600894
GSM1854985	1396.14	2845.79	4241.93	0.336449
GSM1854979	884.745	2339.49	3224.24	0.472855
GSM1854977	1102.76	2961.78	4064.54	0.360853
GSM1854974	1611.33	3239.83	4851.16	0.251002
GSM1854973	954.017	1347.13	2301.14	0.58755
GSM1854972	1015.84	1976.61	2992.46	0.502554
GSM1854970	179.085	2702.38	2881.46	0.516573
GSM1854966	1571.62	2344.26	3915.88	0.381116
GSM1854962	962.894	2061.89	3024.78	0.498446
GSM1854960	654.129	1292.48	1946.61	0.628847
GSM1854958	783.36	2278.77	3062.13	0.493687
GSM1854957	572.74	1354.03	1926.77	0.631109
GSM1854952	1164.26	2322.6	3486.86	0.438545
GSM1854951	1636.9	2739.79	4376.69	0.317757
GSM1854950	1251.63	2396.11	3647.74	0.417201
GSM1854940	782.136	1962.46	2744.59	0.53367
GSM1854937	810.704	2545.67	3356.37	0.455677
GSM1854936	-112.717	-54.3674	-167.084	0.83621
GSM1854935	991.28	1177.26	2168.54	0.603189
GSM1854934	453.685	2107.52	2561.21	0.55624
GSM1854931	1204.7	2970.98	4175.68	0.34559
GSM1854930	1829.91	1810.13	3640.05	0.418227
GSM1854929	1660.54	1867.99	3528.53	0.433039
GSM1854926	1182.01	2492.17	3674.18	0.41367
GSM1854925	-312.194	1626.71	1314.52	0.69818
GSM1854924	1103.78	2817.84	3921.62	0.380337
GSM1854923	1121.31	2494.34	3615.65	0.421477
GSM1854922	1695.12	3169.11	4864.24	0.249143
GSM1854920	-355.702	1464.8	1109.1	0.719448
GSM1854919	677.637	1683.52	2361.16	0.580399
GSM1854918	363.267	2712.96	3076.22	0.491887
GSM1854917	448.037	2144.29	2592.33	0.552438
GSM1854911	-891.081	-87.4617	-978.543	0.895453
GSM1854907	250.787	1199.02	1449.81	0.683827
GSM1854902	1112.99	1458.1	2571.09	0.555033
GSM1854900	1260.57	2857.77	4118.34	0.353476
GSM1854898	-428.853	1521.62	1092.77	0.72111
GSM1854897	1120.72	2333.57	3454.29	0.442836
GSM1854896	772.734	2244.87	3017.61	0.49936
GSM1854888	528.735	1678.82	2207.55	0.598611
GSM1854884	1536.46	3081.69	4618.15	0.283957
GSM1854879	-85.5129	1809.9	1724.39	0.65387
GSM1854875	1220.34	2766.47	3986.81	0.37147
GSM1854874	1583.74	2185.47	3769.21	0.400931
GSM1854872	1661.36	1450.77	3112.13	0.487291
GSM1854871	-269.597	1166.74	897.142	0.740705
GSM1854870	52.6671	1004.65	1057.32	0.724706
GSM1854867	132.174	1030.47	1162.64	0.713967
GSM1854864	1094.42	2023.17	3117.59	0.486591
GSM1854863	22.0659	1089.12	1111.19	0.719234
GSM1854862	1804.84	3145.44	4950.28	0.236892
GSM1854860	200.356	1833.58	2033.94	0.618829
GSM1854857	944.543	1452.26	2396.8	0.576131
GSM1854854	771.228	1795.46	2566.69	0.555571
GSM1854852	1057.53	2037.61	3095.14	0.489468
GSM1854851	576.906	1897.92	2474.82	0.566732
GSM1854850	150.288	470.986	621.273	0.767296
GSM1854848	1153.35	2831.67	3985.02	0.371714
GSM1854847	2012.16	2468.62	4480.78	0.303232
GSM1854844	-373.45	-107.898	-481.349	0.86061
GSM1854843	1331.31	2168.01	3499.32	0.4369
GSM1854842	1637.09	2348.77	3985.86	0.371599
GSM1854840	1433.75	3009.95	4443.71	0.308413
GSM1854839	681.004	1854.68	2535.69	0.559348
GSM1854837	69.7168	1035.23	1104.95	0.71987
GSM1854836	2117.18	2682.21	4799.4	0.258349
GSM1854835	1042.39	2374.27	3416.66	0.447782
GSM1854834	955.969	2150.12	3106.09	0.488065
GSM1854833	1274.27	2562.99	3837.26	0.391761
GSM1854832	169.825	1762.15	1931.97	0.630516
GSM1854828	1081.89	1564.15	2646.04	0.545848
GSM1854826	1021.08	2556.63	3577.71	0.426521
GSM1854821	959.875	2158.22	3118.1	0.486526
GSM1854819	498.939	2272.42	2771.36	0.530343
GSM1854816	581.185	1979.77	2560.95	0.55627
GSM1854814	319.375	1404.74	1724.11	0.653901
GSM1854813	636.913	2298.49	2935.4	0.509777
GSM1854812	83.8536	1258.83	1342.68	0.695215
GSM1854811	272.9	1058.1	1331	0.696446
GSM1854809	220.402	1384.92	1605.32	0.666994
GSM1854808	1485.37	2403.59	3888.96	0.384767
GSM1854807	546.933	2005.83	2552.76	0.557269
GSM1854806	1225.85	1702.51	2928.36	0.510667
GSM1854804	746.354	2402.97	3149.32	0.482516
GSM1854803	-19.9408	2343.3	2323.36	0.584908
GSM1854801	-140.61	2305.06	2164.45	0.603668
GSM1854800	586.535	2336.24	2922.78	0.511371
GSM1854798	741.144	2132.21	2873.36	0.517592
GSM1672712	514.226	2200.57	2714.79	0.537365
GSM1672711	1056.21	2073.63	3129.84	0.485019
GSM1672710	1354.97	1790.84	3145.8	0.482968
GSM1672705	1631.59	3061.83	4693.42	0.273346
GSM1672704	1349.3	2579.26	3928.56	0.379395
GSM1672703	1422.4	2785.63	4208.03	0.34113
GSM1672700	1181.88	2256	3437.88	0.444994
GSM1672695	661.626	1688.75	2350.37	0.581688
GSM1672691	1691.3	1506.45	3197.75	0.476278
GSM1672690	939.89	2212.3	3152.19	0.482147
GSM1672687	1501.27	1992.37	3493.64	0.43765
GSM1672686	791.113	2386.01	3177.12	0.478938
GSM1672681	469.848	1693.76	2163.61	0.603766
GSM1672677	1771.31	1719.74	3491.05	0.437991
GSM1672674	328.582	1846.84	2175.42	0.602382
GSM1672673	-264.193	619.528	355.335	0.791739
GSM1672670	-5.96073	467.747	461.786	0.782097
GSM1672664	103.413	1436.16	1539.57	0.674153
GSM1672662	-229.158	1267.08	1037.92	0.726664
GSM1672661	565.837	1494.71	2060.55	0.615755
GSM1672656	908.787	2572.23	3481.02	0.439315
GSM1672655	1532.39	2879.08	4411.46	0.312912
GSM1672654	211.168	1429.2	1640.37	0.663152
GSM1672653	-131.17	1177.31	1046.14	0.725836
GSM1672651	338.531	1759.77	2098.3	0.61138
GSM1672650	495.929	1172.43	1668.36	0.660071
GSM1672645	126.391	1911.98	2038.37	0.618318
GSM1672643	973.716	1287.28	2260.99	0.592309
GSM1672641	1118.08	2155.7	3273.78	0.466435
GSM1672640	955.876	2381.63	3337.51	0.45814
GSM1672639	695.141	1638.68	2333.82	0.583662
GSM1672637	443.041	1248.61	1691.65	0.657499
GSM1672636	80.9976	1465.26	1546.26	0.673428
GSM1672631	296.874	1641.72	1938.6	0.629761
GSM1672629	132.96	1665.7	1798.66	0.645583
GSM1672628	1028.15	2453.52	3481.67	0.439229
GSM1672626	1048.83	1867.93	2916.76	0.512129
GSM1672624	284.067	1212.62	1496.69	0.678789
GSM1672622	-572.314	418.232	-154.082	0.835162
GSM1672619	280.951	1371.6	1652.55	0.661813
GSM1672618	382.789	1605.84	1988.63	0.624039
GSM1672617	765.917	2730.53	3496.45	0.43728
GSM1672616	75.3144	1120.32	1195.64	0.710567
GSM1672615	1247.93	2163.07	3410.99	0.448525
GSM1672613	563.111	1373.77	1936.88	0.629957
GSM1672612	781.608	2287.79	3069.4	0.492759
GSM1672609	649.718	1278.49	1928.21	0.630944
GSM1672606	562.012	1622.84	2184.85	0.601277
GSM1672605	806.004	1606.71	2412.72	0.574219
GSM1672604	541.4	1564.82	2106.22	0.61046
GSM1672603	652.058	2567.75	3219.8	0.473429
GSM1672601	1180.89	2671.22	3852.11	0.389753
GSM1672600	1212.54	2468.28	3680.83	0.412782
GSM1672598	1381.24	1169.62	2550.87	0.5575
GSM1672597	1190.22	2021.56	3211.77	0.474467
GSM1672596	1028.54	1470.59	2499.13	0.563789
GSM1672595	1310.93	2158.1	3469.03	0.440896
GSM1672594	670.718	1394.25	2064.97	0.615244
GSM1672593	1116.32	2569.72	3686.04	0.412085
GSM1672592	1245.09	2987.67	4232.76	0.337716
GSM1672588	1874.72	2845.63	4720.35	0.269541
GSM1672587	764.805	1803.24	2568.04	0.555405
GSM1672586	-544.033	867.036	323.003	0.794629
GSM1672579	576.155	2029.27	2605.43	0.550833
GSM1672576	1767	3241.15	5008.15	0.22863
GSM1672575	2071.45	2413.95	4485.4	0.302586
GSM1672574	1449.5	2048.72	3498.22	0.437045
GSM1672572	102.686	1963.45	2066.14	0.615109
GSM1672571	938.619	1572.68	2511.3	0.562313
GSM1672570	1665.99	2282.73	3948.71	0.376656
GSM1672568	169.357	1175.67	1345.03	0.694968
GSM1672567	-294.207	325.402	31.1951	0.819896
GSM1672565	1043.85	1350.54	2394.39	0.576419
GSM1672564	1371.87	2193.85	3565.72	0.428112
GSM1672563	1141.88	1489.6	2631.47	0.547638
GSM1672562	226.453	1641.2	1867.65	0.637816
GSM1672561	340.336	1682.4	2022.74	0.620119
GSM1672560	1041.51	1965.66	3007.17	0.500687
GSM1672559	1044.65	2019.51	3064.16	0.493428
GSM1672557	-87.1136	908.759	821.645	0.748105
GSM1672556	875.289	1110.14	1985.43	0.624406
GSM1672553	486.984	2100.22	2587.2	0.553064
GSM1672552	1677.43	3085.15	4762.58	0.263567
GSM1672548	1647.22	2840.39	4487.62	0.302275
GSM1672547	590.057	2561.03	3151.09	0.48229
GSM1672542	1068.55	2123.78	3192.33	0.476977
GSM1672541	-79.4043	1616.5	1537.1	0.674422
GSM1672539	272.079	1954.38	2226.46	0.596385
GSM1672538	1063.47	2172.37	3235.83	0.471355
GSM1672536	1263.1	2611.7	3874.8	0.386684
GSM1672535	1841.15	2655.18	4496.33	0.301056
GSM1672533	1131.44	2653.94	3785.38	0.398756
GSM1672532	1403.99	2612.59	4016.58	0.367409
GSM1672531	1740.57	2908.81	4649.38	0.279559
GSM1672530	276.139	2126.64	2402.78	0.575412
GSM1672528	1518.98	2850.16	4369.14	0.318806
GSM1672527	649.858	1347.7	1997.56	0.623015
GSM1672526	776.911	2123.36	2900.27	0.514207
GSM1672525	1325.51	2643.21	3968.71	0.373935
GSM1672524	488.864	490.939	979.802	0.732499
GSM1672523	705.016	2100.47	2805.48	0.526091
GSM1672522	1516.54	2558.11	4074.65	0.359468
GSM1672521	1098.55	2463.76	3562.31	0.428565
GSM1672520	564.119	1109.59	1673.71	0.659481
GSM1672519	698.057	1948.15	2646.21	0.545827
GSM1672517	523.32	1867.34	2390.66	0.576867
GSM1672516	-27.5116	666.735	639.223	0.765603
GSM1672514	1164.01	2144.07	3308.08	0.461976
GSM1672513	647.03	1369.69	2016.72	0.620812
GSM1672511	717.048	1904.87	2621.92	0.548811
GSM1672509	517.222	1821.81	2339.03	0.583041
GSM1672508	982.632	2816.14	3798.77	0.396952
GSM1672507	1729.68	2551.63	4281.3	0.331
GSM1672506	1477.92	2166.1	3644.02	0.417697
GSM1672505	1564.38	2679.34	4243.72	0.336201
GSM1672504	322.482	1246.1	1568.58	0.671002
GSM1672501	150.308	991.802	1142.11	0.716073
GSM1672498	1650.66	3155.23	4805.89	0.257429
GSM1672497	1071.67	3114.2	4185.87	0.344186
GSM1672496	297.94	1472.7	1770.64	0.648719
GSM1672495	57.0283	1641.66	1698.69	0.65672
GSM1672491	324.296	949.863	1274.16	0.70241
GSM1672490	967.979	2066.33	3034.31	0.497234
GSM1672489	-53.6134	987.668	934.055	0.737054
GSM1672488	712.794	1247.46	1960.25	0.627289
GSM1672485	491.327	1773.38	2264.71	0.591869
GSM1672484	861.608	2314.44	3176.05	0.479076
GSM1672482	1324.63	3340.98	4665.61	0.277271
GSM1672481	981.57	2441.5	3423.07	0.44694
GSM1672480	815.52	1730.14	2545.66	0.558134
GSM1672478	702.429	1934.46	2636.89	0.546974
GSM1672476	1374.51	2625.02	3999.52	0.369736
GSM1672474	-285.603	1285.79	1000.19	0.730459
GSM1672472	973.484	1749.48	2722.97	0.536352
GSM1672471	1021.76	2284.7	3306.46	0.462187
GSM1672470	1299.29	3215.34	4514.64	0.298492
GSM1672469	1543.58	2948.6	4492.18	0.301638
GSM1672466	531.968	1162.4	1694.37	0.657198
GSM1672465	551.691	2091.4	2643.09	0.546211
GSM1672464	919.046	2202.84	3121.88	0.48604
GSM1672462	-387.562	416.91	29.3471	0.820052
GSM1672461	1146.16	2188.16	3334.32	0.458556
GSM1672460	340.223	1509.62	1849.85	0.639827
GSM1672459	410.461	1516.66	1927.12	0.631069
GSM1672458	1383.95	2542.77	3926.72	0.379645
GSM1672451	526.13	2058.41	2584.54	0.55339
GSM1672448	1224.55	2259.46	3484	0.438921
GSM1672446	975.314	2264.08	3239.39	0.470894
GSM1672445	541.406	870.755	1412.16	0.687848
GSM1672443	674.603	1315.79	1990.39	0.623837
GSM1672441	397.149	1417.48	1814.63	0.643791
GSM1672431	206.671	1184.01	1390.68	0.690133
GSM1672430	1172.39	2372.45	3544.84	0.43088
GSM1672429	657.858	2012.29	2670.15	0.54288
GSM1672428	1181.8	2113.08	3294.87	0.463694
GSM1672427	1277.41	2779.2	4056.62	0.361937
GSM1672425	708.095	2252.39	2960.48	0.506607
GSM1672424	1566.06	3034.86	4600.92	0.286381
GSM1672423	1261.28	2932.37	4193.65	0.343114
GSM1672420	1478.76	2859.83	4338.6	0.323053
GSM1672415	1484.79	2891.65	4376.44	0.317791
GSM1672409	981.832	2089.29	3071.12	0.492538
GSM1672407	999.109	2365.53	3364.64	0.454597
GSM1672406	1691.86	3031.7	4723.56	0.269087
GSM1672405	1065.55	2342.36	3407.91	0.44893
GSM1672403	1639.49	3019.72	4659.2	0.278173
GSM1672400	799.559	2875.35	3674.9	0.413574
GSM1672398	-81.1189	484.729	403.61	0.78739
GSM1672396	1319.99	2626.52	3946.51	0.376956
GSM1672394	672.974	2053.92	2726.9	0.535865
GSM1672387	1513.13	1936.35	3449.48	0.443469
GSM1672386	1950.99	2052.61	4003.6	0.369181
GSM1672384	1388.63	2431.92	3820.55	0.394016
GSM1672382	643.144	1873.1	2516.24	0.561712
GSM1672381	867.515	1789.53	2657.05	0.544494
GSM1672379	1202.96	2414.47	3617.43	0.42124
GSM1672374	1695.91	2668.82	4364.73	0.31942
GSM1672373	1095.97	2353.79	3449.76	0.443432
GSM1672372	1349.8	2875.56	4225.36	0.338739
GSM1672371	1416.21	1707.8	3124.01	0.485768
GSM1672369	1099.64	2103.75	3203.39	0.47555
GSM1672366	907.793	1676.48	2584.27	0.553423
GSM1672365	806.178	1507.88	2314.06	0.586015
GSM1672363	1118.78	1738.28	2857.06	0.519637
GSM1672361	968.169	2185.82	3153.99	0.481916
GSM1672360	1081.96	2088.73	3170.69	0.479766
GSM1672359	394.468	1724.55	2119.01	0.608971
GSM1672358	317.906	2006.33	2324.23	0.584804
GSM1672357	1480.38	1363.3	2843.68	0.521314
GSM1672354	814.491	1805.07	2619.56	0.549101
GSM1672352	321.497	1547.01	1868.51	0.637719
GSM1672351	1010.7	2681.91	3692.62	0.411205
GSM1672349	341.089	1569.92	1911.01	0.632902
GSM1672347	990.464	2216.8	3207.27	0.475049
GSM1672344	406.52	1355.06	1761.58	0.64973
GSM1672343	1116.48	2205.36	3321.84	0.460183
GSM1672339	1115.57	2484.1	3599.67	0.423603
GSM1672337	1650.92	2798.02	4448.94	0.307683
GSM1672335	1149.41	2600.41	3749.82	0.403537
GSM1672333	848.633	1848.05	2696.69	0.539604
GSM1672330	1851.47	3052.15	4903.62	0.24354
GSM1672328	1734.45	1648.86	3383.32	0.452153
GSM1672327	1269.84	2611.38	3881.22	0.385815
GSM1672326	1524.08	2303.22	3827.3	0.393105
GSM1672325	1515.75	2484.18	3999.93	0.369681
GSM1672322	1487.75	2593.87	4081.62	0.358513
GSM1672321	1836.59	2541.23	4377.82	0.317599
GSM1672320	1153.35	2062.71	3216.06	0.473913
GSM1672319	1500.82	3018.65	4519.47	0.297816
GSM1672316	261.031	1553.57	1814.61	0.643794
GSM1672312	1409.42	2651.44	4060.87	0.361355
GSM1672301	685.885	2066.31	2752.19	0.532726
GSM1672300	-762.857	485.049	-277.808	0.845012
GSM1672298	1471.93	2596.94	4068.87	0.36026
GSM1672295	361.63	1470.66	1832.29	0.641805
GSM1672294	1365.83	3208.41	4574.24	0.290131
GSM1672293	799.129	1574.86	2373.99	0.578864
GSM1672292	1549.83	3405.17	4955	0.236219
GSM1672291	795.498	2784.28	3579.78	0.426246
GSM1672290	1252.34	2429.54	3681.88	0.412641
GSM1672289	540.975	1853.74	2394.71	0.576381
GSM1672288	1133.08	2749.72	3882.81	0.3856
GSM1672287	1149.59	2130.18	3279.77	0.465657
GSM1672286	-2.5994	812.214	809.615	0.749275
GSM1672285	1263.35	2237.52	3500.87	0.436696
GSM1672284	969.989	2730.11	3700.1	0.410204
GSM1672283	940.29	2339.23	3279.52	0.46569
GSM1672282	870.254	1977.12	2847.37	0.520851
GSM1672281	1274.86	3230.64	4505.51	0.299771
