# Supplementary material for: Identification of fatty acid-related subtypes, the establishment of a prognostic signature, and immune infiltration characteristics in lung adenocarcinoma
Source: Aging (Albany NY). 2023 May 16;15(10):4202–35. doi: 10.18632/aging.204725 (PMC10258028; doi:10.18632/aging.204725)
Supplement: Supplementary Table 17 [file aging-15-204725-s016.xlsx]

## Sheet: Sheet1
Supplementary Table 17. The expression of immune checkpoint for all LUAD patients.
id	TCGA-S2-AA1A	TCGA-O1-A52J	TCGA-NJ-A7XG	TCGA-NJ-A55R	TCGA-NJ-A55O	TCGA-NJ-A55A	TCGA-NJ-A4YQ	TCGA-NJ-A4YP	TCGA-NJ-A4YI	TCGA-NJ-A4YG	TCGA-NJ-A4YF	TCGA-MP-A5C7	TCGA-MP-A4TK	TCGA-MP-A4TJ	TCGA-MP-A4TI	TCGA-MP-A4TH	TCGA-MP-A4TF	TCGA-MP-A4TE	TCGA-MP-A4TD	TCGA-MP-A4TC	TCGA-MP-A4TA	TCGA-MP-A4T9	TCGA-MP-A4T8	TCGA-MP-A4T7	TCGA-MP-A4T6	TCGA-MP-A4T4	TCGA-MP-A4SY	TCGA-MP-A4SW	TCGA-MP-A4SV	TCGA-MN-A4N5	TCGA-MN-A4N4	TCGA-MN-A4N1	TCGA-L9-A8F4	TCGA-L9-A7SV	TCGA-L9-A743	TCGA-L9-A5IP	TCGA-L9-A50W	TCGA-L9-A444	TCGA-L9-A443	TCGA-L4-A4E6	TCGA-L4-A4E5	TCGA-J2-A4AG	TCGA-J2-A4AE	TCGA-J2-A4AD	TCGA-J2-8194	TCGA-J2-8192	TCGA-99-AA5R	TCGA-99-8033	TCGA-99-8032
IDO1	7.52657	6.33978	8.25431	4.96909	6.90487	7.11652	7.89674	8.2444	5.2696	7.43894	5.44029	6.79734	7.44596	9.22163	10.0421	7.55682	8.46398	5.05372	6.55022	8.68964	11.3729	7.0345	5.24996	7.13723	8.05207	10.0237	6.97066	6.22536	8.32214	8.39264	6.38505	6.58356	7.33976	6.96174	8.19368	5.69495	6.89943	9.17427	7.13936	7.81124	6.23618	8.41028	7.32599	5.3961	7.08676	9.27211	8.32618	8.75407	6.26927
LAG3	7.26198	5.45017	3.5003	8.44305	4.30713	5.85382	6.51961	5.46478	4.71014	4.923	3.85976	7.69845	4.97183	7.19057	7.87164	5.59237	5.31823	4.12254	4.77441	6.75609	6.2081	4.77064	4.18083	5.05191	7.97071	6.96835	4.40378	4.50987	6.66847	7.03696	4.85515	4.00942	6.36019	4.63722	6.29316	5.14822	6.15817	7.38835	5.04012	4.74129	5.00988	5.52384	6.35168	4.02438	4.08827	5.74408	5.39829	7.02841	4.49751
CTLA4	6.56384	6.50116	4.84655	5.45654	5.29341	6.39102	6.65974	5.9964	5.5112	6.65514	5.20472	4.8855	6.74961	7.97931	8.25436	6.95368	5.19472	3.79763	5.97892	6.66438	6.3198	6.10668	4.72186	6.19352	6.5185	7.17429	5.27495	6.39578	7.07737	6.59448	4.34717	4.71872	6.79136	5.32123	8.20502	5.8618	5.4106	7.12035	6.21282	6.17895	5.86633	7.37178	6.94796	4.06201	5.57825	6.65409	7.24136	6.90612	6.35199
TNFRSF9	4.35353	4.15898	3.389	3.8999	3.90226	4.76231	4.81793	5.2466	3.7205	4.54387	4.3476	3.68837	4.99441	5.89389	6.07682	4.90156	4.71002	3.29732	4.01879	5.64218	4.53266	4.60388	5.2116	4.14765	5.21769	5.73385	4.92756	5.23773	5.18489	5.37217	3.91569	6.51298	5.37239	3.78723	5.79267	4.22375	5.06943	5.63672	4.56844	4.30228	5.97616	5.15992	4.73813	3.27878	4.17015	5.71214	4.78476	5.51096	4.71773
ICOS	5.34386	4.60622	3.31925	3.64383	4.39629	5.08377	5.46419	4.5823	4.54742	5.12674	3.76367	2.93588	4.88467	7.68164	7.87146	6.26814	3.5234	2.59359	4.43494	5.23499	4.77324	5.80242	3.75947	5.06566	5.44178	6.13143	3.67947	4.9411	6.21916	5.50555	2.88896	2.93946	5.54542	3.53457	6.96388	4.19725	4.02364	5.93445	4.65567	4.79519	4.58951	6.71255	5.45564	2.87652	4.43015	6.21103	5.43961	4.93207	4.13224
CD80	5.54195	6.44696	4.58699	4.545	5.49147	6.0066	5.19614	4.91708	5.54777	6.03366	4.67023	4.59947	5.97779	6.61615	7.00385	5.59211	4.77771	4.162	5.2151	5.82928	5.24531	5.95481	5.0412	5.18984	5.82852	5.72965	5.86705	5.06731	5.88803	5.11761	4.56177	4.54122	5.32412	4.91614	6.9703	4.78639	4.94699	5.60656	4.80092	5.85104	4.50792	6.56912	6.07863	4.66496	5.57003	6.87707	5.84153	4.95751	4.75718
PDCD1LG2	4.25091	4.23328	2.14725	2.56834	3.57238	4.63451	4.64315	4.50487	3.8642	3.61993	2.83961	2.81797	4.13083	5.38856	6.37676	4.38126	5.03798	2.07263	3.02528	5.28486	4.02333	4.70276	2.8021	3.33489	3.68735	5.03749	4.43812	3.4182	4.68075	4.12303	3.6776	2.46741	4.70047	2.9095	4.75243	4.18686	3.37101	4.87821	3.4055	4.22384	3.30502	4.30983	3.39699	2.48945	4.0942	5.23653	4.51139	4.49513	3.29388
CD70	4.85604	4.23615	3.71422	4.0854	3.74424	4.57421	5.07555	4.45443	4.30379	3.981	3.27837	3.42779	5.97435	5.45148	7.92138	5.024	4.70115	3.41465	4.48935	5.82122	7.16432	4.23704	5.75129	4.08807	5.86906	5.23428	3.92597	5.51003	5.42741	6.14673	4.74755	3.6287	7.1124	3.87855	6.11414	4.23601	4.13289	5.08663	4.0632	5.2237	4.24591	4.8776	4.22085	3.33005	4.335	5.409	5.43657	4.41464	4.10476
TNFSF9	5.15862	5.22996	6.26673	4.63625	5.90619	5.80408	5.61373	8.45595	6.9919	7.09248	3.53794	5.66499	6.00919	5.78448	7.42668	5.18115	6.13781	4.41788	6.84773	5.55111	7.34585	6.07875	5.69367	6.91116	7.2515	5.93629	7.22909	7.32664	6.2146	5.96842	6.3658	6.28571	5.4816	6.40333	6.87714	5.54899	6.62817	6.81499	6.50766	5.26	6.37795	6.95488	5.92902	5.15608	5.62926	6.51271	6.05027	5.88188	5.10303
ICOSLG	4.06688	4.63916	3.63798	4.92229	3.6171	3.76374	3.54774	3.78033	3.88516	3.58333	4.78307	3.56417	3.86601	4.69081	4.54624	3.95126	5.28353	4.03223	3.53389	4.20186	4.28557	4.32353	4.01116	4.6418	3.58136	4.18058	3.85256	4.48648	4.27321	5.4634	4.13206	4.05491	4.05419	3.76191	4.14795	3.75194	4.03928	3.68822	3.63154	3.66398	3.71843	4.24945	4.33102	3.89995	4.69964	5.34107	3.89362	3.93171	3.8012
KIR3DL1	2.68786	3.04646	2.8608	2.72102	2.87431	3.03715	3.21063	3.38394	2.68786	2.68786	2.84105	3.69102	2.68786	4.12359	4.30378	2.76718	3.32136	2.75372	3.02067	3.12217	3.04928	3.25891	2.68786	3.41228	2.83443	2.90196	2.68786	2.83642	3.98087	3.24985	2.99377	2.68786	2.94157	3.45884	2.84083	2.83796	2.75875	3.38639	3.24948	3.4271	2.68786	3.30459	2.77626	2.68786	2.83642	2.86255	4.02963	2.90732	2.79476
CD86	6.25043	7.19271	5.21943	5.43795	6.74691	6.79635	6.62118	6.29263	6.60651	6.57203	5.70441	5.12961	6.90154	7.43432	8.25945	6.74308	6.13785	4.41818	5.89078	7.024	6.7505	6.84928	5.6757	6.57269	6.10664	7.06703	6.65317	6.54411	6.92185	6.48552	6.29481	5.19922	6.64242	5.6199	7.39961	5.65872	6.10696	6.76309	6.16588	8.06934	5.48819	7.36025	6.55511	5.47393	6.85137	7.92809	6.51422	6.6151	5.93713
PDCD1	5.01405	4.7688	3.549	4.2994	4.12496	5.5015	5.90741	4.23927	4.92877	4.15131	4.16051	3.3394	5.27422	6.10918	6.43755	5.66108	4.44514	3.37917	4.62779	5.64077	5.39724	6.2523	4.11262	4.40007	5.07783	5.95956	4.15984	4.89614	6.1808	6.21761	4.21635	3.56745	5.9158	4.34711	6.02184	4.41174	5.15156	6.4077	4.54836	4.59657	4.71326	4.8918	4.60571	3.78943	4.56302	4.29486	5.69925	5.97433	4.29542
LAIR1	6.81989	7.92277	5.53834	5.74278	7.64215	7.50189	7.61858	6.80779	8.3687	7.70048	5.90624	5.57205	7.74987	7.7996	8.88721	7.39871	6.33513	5.29152	6.80115	7.73271	7.38885	8.16018	6.30241	7.40165	6.98978	7.9082	7.90292	7.71645	7.55063	7.2383	7.08182	6.13094	7.56743	6.27062	7.73928	6.73895	6.7722	7.72313	6.80445	9.42928	6.32058	7.56883	6.72024	6.26858	7.40425	8.33977	8.02913	6.98774	6.5026
TNFRSF8	4.89123	4.38891	3.96865	4.20291	4.46237	4.84761	5.61174	4.96408	4.89222	4.54181	4.16396	4.03621	5.19432	6.40099	6.10283	5.00783	4.51078	4.51903	5.30461	5.13105	5.14457	4.60243	4.35999	5.0011	4.66273	5.17071	4.38669	6.35435	5.2475	4.94766	5.8956	4.3498	5.51089	4.17295	5.54247	4.40364	4.36604	5.32669	4.4203	5.03639	4.39047	4.60793	4.1336	4.00619	4.81567	4.87836	5.45025	5.39907	4.80899
TNFSF15	5.79155	5.64655	7.04721	5.14795	7.62214	6.67101	4.77695	6.92331	6.2352	6.01444	4.3487	7.64511	5.63486	7.97706	5.77128	7.59555	6.95727	5.8724	4.83315	6.64322	5.92141	5.64423	6.38453	7.31749	6.84566	5.9025	4.88359	6.3775	5.96338	5.7571	4.79413	6.17951	7.45311	5.30334	6.04026	4.26281	6.42217	5.64678	6.29003	6.46042	8.1712	6.34161	7.58391	5.33831	6.62508	7.09629	6.19868	5.14572	5.78865
TNFRSF14	8.39003	7.66241	7.95905	7.40063	8.18862	8.1147	7.98411	8.13396	8.17254	7.90784	6.39196	7.78054	8.00725	8.17237	8.8538	8.14354	8.26878	6.68977	7.59458	8.24787	8.07423	8.17064	7.43137	7.95515	9.47729	8.51599	7.85522	8.6524	7.99697	8.36282	7.65515	8.44328	8.16791	7.78393	8.1657	6.96917	8.37965	8.20636	7.73234	8.82429	7.68861	8.16917	8.09135	7.15779	7.13531	7.8027	8.43531	7.97035	7.02616
CD40	8.23083	8.22273	6.45892	6.59399	6.84313	7.73898	7.87306	6.85053	7.94169	7.449	5.57607	5.47561	7.01414	7.92757	8.50888	7.56333	6.29698	4.71351	6.49942	7.63755	7.93033	7.87857	5.60307	6.94316	8.6567	8.18305	6.7098	7.08913	7.82597	7.54371	7.53191	7.042	7.7465	5.85658	7.95735	5.96308	7.83689	7.91288	7.75929	7.49103	6.51515	7.95689	6.31299	6.99301	6.62793	7.75633	7.93096	7.66816	6.16988
TNFRSF4	6.24602	5.57586	4.90073	5.17696	5.79696	5.13354	5.84097	6.09573	4.98786	5.07375	5.25536	4.82249	6.07262	6.5412	7.30431	6.0212	4.63992	5.1123	5.65849	6.21856	5.90455	6.35438	7.1733	5.7332	5.53252	6.71445	5.40628	5.66602	6.13105	5.73049	5.5345	5.31964	7.24608	4.44924	6.73287	4.63358	5.89389	5.71965	5.27477	5.97351	5.86663	5.95287	4.99179	4.50115	5.53844	5.38933	6.35388	5.16139	5.80813
TNFSF14	4.59791	4.73706	7.09353	3.85483	4.35231	5.17448	4.77207	5.23114	6.81936	5.27179	2.68646	3.43699	3.50907	5.37826	5.25462	5.81969	5.46252	3.30078	4.25849	4.61516	7.10531	5.02216	5.36135	6.03102	3.95069	4.47893	3.4178	4.01543	4.55114	5.1978	3.57696	4.01654	4.55251	2.89252	4.14915	6.83416	3.94738	4.43652	3.63056	5.58045	3.5816	4.50655	5.14801	3.4481	4.20812	3.74508	4.45704	6.07807	3.63895
HHLA2	3.66732	9.28634	4.24585	2.84714	4.18234	6.74986	2.40533	5.82601	8.52423	2.37826	2.25575	2.2486	3.86388	3.6821	4.01535	2.8399	2.85904	2.16719	2.5901	2.6918	3.32723	2.53057	2.25979	3.89273	5.74377	4.65601	9.27251	9.52683	5.4132	2.64587	2.67352	2.43133	2.37415	2.88559	8.70133	2.25361	6.83616	4.43166	3.32386	3.23239	3.36978	2.57068	6.6277	5.62145	2.57087	6.88263	2.67644	2.7079	2.30829
CD244	5.04444	4.75043	3.56345	3.60555	3.98251	4.88959	5.16688	4.83151	3.70083	3.9736	3.20284	3.78175	3.87814	6.30074	6.07894	5.43322	4.38626	3.5863	3.88972	4.6486	4.85981	5.05404	3.33066	4.57265	5.31224	5.49954	3.39345	4.24004	5.11823	5.11252	4.04628	3.78336	4.8693	3.876	4.25215	4.39363	3.76774	5.49166	4.53374	5.89305	4.24104	5.21583	4.35912	3.36855	4.17824	4.71955	6.09376	6.08924	3.87698
CD27	8.75209	6.24632	4.96381	7.638	5.70344	8.35964	8.802	6.03741	5.41513	6.63025	5.34513	5.84528	8.13887	8.80773	7.97633	8.95676	7.30291	5.6434	7.72213	6.66073	6.91644	6.28101	5.16582	5.91428	7.18338	8.48565	5.8961	7.69831	8.19049	6.81878	6.71351	4.77811	8.59548	5.71362	8.1168	6.30631	6.73099	8.36307	5.96057	6.24807	6.89013	7.65275	7.28543	5.28708	5.19746	7.0329	8.3891	6.17505	8.39934
CD28	5.15401	4.1727	2.78955	3.51026	4.16842	5.46417	5.12323	4.08289	3.64901	3.90602	3.03557	3.15858	4.82212	6.32717	5.62768	5.50011	3.11464	3.00164	4.40738	4.05696	3.98074	4.42287	3.35833	3.96297	4.32751	4.73472	4.13373	4.71662	4.94463	4.05309	3.34528	3.1429	4.81168	3.12015	5.66044	3.03425	3.76208	4.68139	3.42121	4.27367	3.44875	5.11506	4.71547	3.33756	4.4056	5.43957	4.86267	3.26307	4.36752
CD48	8.20042	7.20631	5.96237	6.57752	7.37612	8.60179	8.38218	6.92196	6.26164	6.70249	5.94277	5.85714	7.07226	8.82605	8.44316	8.5035	6.28284	5.27097	7.37148	6.89422	6.69173	7.30494	5.86093	6.80123	7.38699	7.59229	6.05479	7.3635	7.76046	7.30648	6.57589	5.12684	8.08264	6.12243	7.99603	6.29156	6.75471	7.77782	7.2586	8.28751	6.27593	8.08881	7.48625	5.94227	6.85275	7.56815	8.59667	7.35043	6.76622
TNFRSF25	6.26978	5.47808	6.44887	6.76046	5.55181	6.02993	6.17547	6.18635	6.87641	5.78508	4.9005	6.31169	6.31683	6.89922	7.38859	6.84117	5.86351	5.77616	6.36726	6.02229	6.32291	6.49959	6.83046	5.93239	6.74295	6.35437	5.61454	7.18702	7.7255	6.99009	5.96448	6.69957	6.7583	7.15779	6.48513	5.20169	6.59746	6.61532	5.89085	5.96174	6.0587	7.29968	6.74702	6.57299	5.20282	5.83421	6.38607	6.57441	6.0751
CD40LG	6.16414	4.22575	3.50105	3.58565	4.82939	5.87356	5.04281	3.47231	3.22271	4.15721	2.94759	3.62325	4.86618	5.76915	5.43714	6.05516	2.96555	2.67511	5.05943	3.26024	3.03631	4.57491	3.2451	3.76151	4.82959	4.28284	3.53511	4.85669	4.57979	4.03177	2.8959	2.54472	4.84183	2.94661	5.05581	2.56968	4.46614	4.4835	4.90047	5.05567	3.34045	5.59551	5.52154	3.22312	4.21841	5.09248	6.08949	3.36352	3.47702
VTCN1	7.3181	3.9143	6.02421	3.63323	4.61749	6.10755	6.42582	3.71041	3.03773	3.432	6.53834	3.45846	3.88034	5.01743	3.72131	3.47747	3.08471	3.2881	4.96178	6.48072	5.17847	8.74017	5.30875	4.16481	4.66665	3.88487	3.9575	4.94798	4.65851	5.68751	8.58222	5.84854	6.05814	3.98089	6.05438	4.61232	4.11355	3.77579	5.9604	3.44867	6.4278	3.69547	6.32808	8.59223	3.72773	7.20839	5.8632	4.51152	4.04472
CD160	3.98126	3.71902	4.16291	3.86238	3.91614	4.60698	4.67472	4.19318	4.39085	3.85161	3.70683	4.15381	4.1725	5.5468	4.65639	5.15764	4.59851	3.58246	4.1017	3.86595	3.59851	4.97681	3.92878	3.8814	4.7775	4.03198	3.87389	3.99644	4.32995	3.67504	3.92431	4.13103	4.09459	4.95803	3.70662	4.41123	3.32342	3.97	3.81765	3.93886	4.38446	3.7505	4.10315	4.23336	3.87745	3.69289	5.2451	5.01346	3.65901
CD44	8.96069	9.69913	8.21356	7.85337	8.94205	9.28523	8.76078	9.07555	10.2438	9.92785	7.49609	7.64228	9.87935	9.6447	10.5497	9.07712	8.80964	7.16526	7.84522	9.20891	8.03786	9.57446	8.30389	8.59122	9.73782	9.22272	10.0186	9.46569	8.80085	8.78761	8.38172	7.79132	8.46128	8.83933	9.05092	8.15752	9.27935	8.62324	9.28131	9.68664	7.46934	9.54283	9.13562	7.65241	8.95821	10.0654	9.16501	9.2107	8.28187
TNFSF18	4.20645	4.91186	3.53987	3.18755	3.52982	3.81899	3.27606	3.06786	3.66585	3.59775	2.80606	4.20489	3.29807	3.29987	3.80552	3.40176	3.32539	3.13491	3.70824	3.33464	3.82728	4.27692	3.23839	3.21365	3.11634	5.16397	3.81334	4.08377	3.54664	3.58943	2.92803	3.12108	4.07054	3.03424	4.19877	2.80528	4.22575	3.97726	3.27339	3.69361	3.23443	4.4694	3.95599	3.04649	4.05266	4.58266	3.23868	3.11272	3.43647
BTNL2	4.00347	2.63999	2.46587	2.70373	2.46587	3.63051	2.61663	2.61956	2.46587	2.81179	2.46587	2.59901	3.38866	2.8938	2.46587	3.01437	2.72398	2.58688	2.59508	2.95653	4.04972	2.6319	2.61403	2.60522	3.63413	2.46587	3.11173	3.33505	2.78494	5.28512	2.75444	2.59213	2.70437	3.36967	3.12634	2.60587	2.95977	3.07466	2.46587	2.91533	2.60228	3.06097	2.9314	2.85092	2.60457	2.98207	2.8929	2.86547	2.84696
TNFSF4	5.79445	5.7335	4.23694	5.14563	4.40984	5.34386	5.13161	6.83098	4.81247	5.9054	4.11004	4.96631	5.83638	6.60477	6.34026	5.12169	5.03222	4.73601	5.20944	6.41748	6.04931	5.78837	5.69536	4.62998	4.46448	7.11615	6.94537	5.65212	5.99506	5.24403	5.88657	4.90928	6.50532	4.81084	6.2377	4.91851	5.121	5.98303	5.64408	4.82976	5.1688	5.5295	5.23466	5.28807	5.63866	7.30533	5.30775	5.81634	5.86279
CD200	6.6995	5.78018	4.61096	6.16711	5.88342	6.4101	6.25773	7.3666	6.29344	5.7333	5.03751	5.70457	6.64404	7.13685	6.52245	6.48028	4.96209	5.16564	7.39226	6.45678	6.48569	6.51213	6.25035	5.91128	4.99342	6.38527	6.5469	6.14457	6.22257	6.23518	6.84034	5.31882	5.87224	5.44616	6.41058	6.05421	5.6492	6.11152	6.33222	6.68433	5.8064	7.22221	6.38794	5.97766	6.92721	6.85384	6.78833	6.13013	6.7174
NRP1	7.03088	8.18694	7.44018	6.70769	6.42309	8.02698	6.463	7.25598	7.62766	8.33226	7.48266	6.98501	8.16808	7.15674	8.23201	6.95191	7.11859	7.89025	7.26776	8.51961	6.42113	7.87599	7.74188	6.9025	8.10044	7.91781	7.54819	7.40858	7.64605	8.69242	7.49663	7.56424	7.21225	6.63724	7.88595	6.79985	8.00595	8.38423	9.23659	7.57277	7.26906	8.57947	6.5041	7.3807	8.59263	9.01717	7.70674	6.60728	7.70768
[truncated: 1,520 more columns]
