# Supplementary material for: Identification of fatty acid-related subtypes, the establishment of a prognostic signature, and immune infiltration characteristics in lung adenocarcinoma
Source: Aging (Albany NY). 2023 May 16;15(10):4202–35. doi: 10.18632/aging.204725 (PMC10258028; doi:10.18632/aging.204725)
Supplement: Supplementary Table 18 [file aging-15-204725-s017.xlsx]

## Sheet: Sheet1
Supplementary Table 18. The enrichment score of immunotherapy-predicted pathways for all LUAD patients.
id	TCGA-S2-AA1A	TCGA-O1-A52J	TCGA-NJ-A7XG	TCGA-NJ-A55R	TCGA-NJ-A55O	TCGA-NJ-A55A	TCGA-NJ-A4YQ	TCGA-NJ-A4YP	TCGA-NJ-A4YI	TCGA-NJ-A4YG	TCGA-NJ-A4YF	TCGA-MP-A5C7	TCGA-MP-A4TK	TCGA-MP-A4TJ	TCGA-MP-A4TI	TCGA-MP-A4TH	TCGA-MP-A4TF	TCGA-MP-A4TE	TCGA-MP-A4TD	TCGA-MP-A4TC	TCGA-MP-A4TA	TCGA-MP-A4T9	TCGA-MP-A4T8	TCGA-MP-A4T7	TCGA-MP-A4T6	TCGA-MP-A4T4	TCGA-MP-A4SY	TCGA-MP-A4SW	TCGA-MP-A4SV	TCGA-MN-A4N5	TCGA-MN-A4N4	TCGA-MN-A4N1	TCGA-L9-A8F4	TCGA-L9-A7SV	TCGA-L9-A743	TCGA-L9-A5IP	TCGA-L9-A50W	TCGA-L9-A444	TCGA-L9-A443	TCGA-L4-A4E6	TCGA-L4-A4E5	TCGA-J2-A4AG	TCGA-J2-A4AE	TCGA-J2-A4AD	TCGA-J2-8194	TCGA-J2-8192	TCGA-99-AA5R	TCGA-99-8033	TCGA-99-8032
IFN-Gamma_signature	0.310234	0.125959	-0.00332299	0.0404469	0.124245	0.224889	0.384019	0.180276	-0.0418168	0.136561	0.0028844	0.0475768	0.183756	0.408019	0.413279	0.294655	0.154446	-0.0883421	0.072208	0.269309	0.24705	0.141252	-0.0688748	0.127426	0.217519	0.412009	0.0425821	0.159441	0.295597	0.286632	0.0586354	-0.0956836	0.313275	0.0446751	0.312765	0.105402	0.136177	0.43949	0.114568	0.241336	0.100744	0.215438	0.216077	-0.0619763	0.0182777	0.180389	0.339801	0.316046	0.0599215
APM_signal	0.480074	0.488116	0.442382	0.442205	0.445245	0.464083	0.482657	0.504354	0.413542	0.484191	0.368907	0.400349	0.44366	0.538995	0.534445	0.480868	0.531425	0.377897	0.439931	0.510565	0.532293	0.447115	0.449279	0.453074	0.467412	0.542286	0.474057	0.470952	0.495969	0.548717	0.484721	0.404159	0.456181	0.466041	0.514198	0.499872	0.480272	0.571234	0.447438	0.460501	0.479524	0.453894	0.494584	0.42353	0.435612	0.446835	0.496435	0.561222	0.427766
Base_excision_repair	0.0915162	0.11475	0.133048	0.180905	0.13359	0.130466	0.202821	0.192174	0.17313	0.144805	0.198532	0.163968	0.184808	0.182612	0.241271	0.101976	0.26075	0.225065	0.198689	0.218316	0.283838	0.151189	0.187724	0.224861	0.177459	0.203365	0.17596	0.154308	0.283667	0.192284	0.195351	0.219614	0.227109	0.294118	0.180866	0.271091	0.154469	0.174801	0.163879	0.06175	0.323526	0.101543	0.235673	0.19124	0.086777	0.114909	0.119351	0.27651	0.180719
Cell_cycle	-0.135265	-0.0909958	-0.116198	-0.0614742	-0.0761089	-0.134017	0.00301632	0.0125575	-0.108345	-0.0993982	0.0704351	-0.0687809	0.0383904	-0.0507829	0.112345	-0.138012	0.05842	0.0291086	-0.06435	0.12296	0.170775	-0.0429847	0.0523334	0.0242878	-0.109113	0.10192	0.00179395	-0.00875463	0.13095	0.0694054	0.0190173	0.106734	0.0917793	0.0799193	0.0187604	0.136912	-0.082298	-0.0475747	-0.102536	-0.157409	0.18565	-0.113227	0.0280455	0.0644912	-0.139633	-0.114546	-0.141673	0.184485	-0.00854664
DNA_replication	0.00341294	0.00122632	0.0213684	0.0312636	0.0212257	0.0246301	0.0958402	0.0642233	0.0310214	0.0164429	0.140797	0.0364865	0.100893	0.0488414	0.159708	-0.0331939	0.183933	0.100292	0.0461039	0.155802	0.237522	0.0548887	0.0581089	0.0704478	0.0564268	0.104561	0.0756732	0.0653041	0.197426	0.106653	0.0928391	0.179066	0.164151	0.249532	0.0917378	0.157695	0.0499408	0.0838232	0.0485516	-0.0565866	0.28459	-0.00650853	0.158828	0.108204	-0.0363559	0.00249293	-0.0121086	0.221262	0.0735474
Fanconi_anemia_pathway	-0.1884	-0.148713	-0.137679	-0.152188	-0.135549	-0.143182	-0.0646913	-0.102867	-0.179565	-0.162333	-0.0555555	-0.129608	-0.106342	-0.167097	-0.10032	-0.198239	-0.061167	-0.14777	-0.167489	-0.0685969	0.0288426	-0.103094	-0.156722	-0.1324	-0.154944	-0.108306	-0.124403	-0.122425	-0.0744719	-0.0810704	-0.124457	-0.0552098	-0.0739296	0.00044715	-0.133798	-0.0317262	-0.157364	-0.130817	-0.123135	-0.200503	-0.00347287	-0.142189	-0.0572441	-0.0548829	-0.156583	-0.136319	-0.206821	-0.00657323	-0.147737
Homologous_recombination	-0.18512	-0.171812	-0.140737	-0.193159	-0.161592	-0.166745	-0.0873152	-0.137512	-0.179819	-0.184219	-0.0626043	-0.155547	-0.109977	-0.173453	-0.0926528	-0.191851	-0.077715	-0.156055	-0.166366	-0.0774944	-0.033955	-0.105673	-0.164812	-0.13681	-0.127323	-0.0940526	-0.161489	-0.137368	-0.0672524	-0.0836477	-0.137141	-0.0434193	-0.0871107	-0.0178252	-0.137264	-0.0658168	-0.161806	-0.120692	-0.137152	-0.201938	0.0141117	-0.168551	-0.0697472	-0.0836638	-0.199905	-0.167646	-0.188803	-0.0610646	-0.155743
MicroRNAs_in_cancer	-0.21078	-0.127877	-0.217711	-0.159204	-0.140112	-0.226486	-0.0685522	-0.0896092	-0.167575	-0.178246	-0.0203533	-0.190129	-0.0470372	-0.131046	0.0154215	-0.205771	-0.0614579	-0.0660271	-0.117323	0.0502657	0.0668501	-0.110837	-0.0646184	-0.0943559	-0.16561	0.0672411	-0.110249	-0.0832008	0.000367014	0.0153584	0.00873772	0.0153803	0.010866	0.0156039	-0.0962122	0.00914504	-0.171405	-0.122199	-0.168101	-0.195195	0.136637	-0.170048	0.0739264	-0.0124739	-0.204883	-0.196507	-0.18949	0.0963395	-0.0913706
Mismatch_repair	0.0589094	0.0391273	0.0789174	0.095139	0.0661081	0.0978493	0.148759	0.109521	0.0645383	0.0494064	0.181311	0.0812917	0.16152	0.0760923	0.192465	0.0298616	0.202143	0.126487	0.0841879	0.182976	0.248913	0.108175	0.0825761	0.134374	0.0866675	0.137542	0.102443	0.0875274	0.2099	0.134972	0.128707	0.228536	0.183999	0.274879	0.129116	0.248502	0.0907332	0.101505	0.0981781	-0.00972956	0.295222	0.0577283	0.202202	0.172741	0.00790412	0.064832	0.0293214	0.245444	0.124306
Nucleotide_excision_repair	0.0695059	0.0637027	0.0933654	0.0936423	0.0708485	0.106244	0.133227	0.102785	0.0828869	0.0592839	0.159404	0.0920822	0.150993	0.0901118	0.179073	0.0353741	0.212363	0.136142	0.091284	0.168866	0.242279	0.104594	0.0836289	0.118858	0.107335	0.12725	0.112047	0.104753	0.21516	0.124488	0.131959	0.210949	0.183962	0.253249	0.118073	0.189344	0.0949067	0.10889	0.106993	0.00672227	0.288213	0.0668658	0.198939	0.158122	0.0300517	0.0781028	0.0418707	0.209764	0.110054
Oocyte_meiosis	-0.18365	-0.113497	-0.163076	-0.0389196	-0.0877853	-0.177591	-0.00244146	-0.00197367	-0.141954	-0.145365	0.0780375	-0.0696587	0.0174144	-0.0560003	0.123164	-0.173716	0.0462175	0.0308269	-0.0790533	0.0912629	0.172836	-0.052349	0.0612647	0.0562294	-0.148575	0.0952089	-0.0395404	-0.0166023	0.128897	0.0238778	-0.0369958	0.101579	0.0546203	0.0622199	-0.00743474	0.0962102	-0.129158	-0.0751083	-0.10199	-0.183926	0.164568	-0.146288	-0.0233123	0.0308798	-0.169297	-0.153539	-0.177533	0.172962	0.0057746
p53_signaling_pathway	-0.201905	-0.120688	-0.206138	-0.139088	-0.113133	-0.233513	-0.0147122	-0.0374958	-0.152977	-0.162935	-0.0157747	-0.160866	0.0266077	-0.0887583	0.104548	-0.219039	0.0145466	-0.00966755	-0.1207	0.120622	0.108792	-0.0495285	0.00445558	0.0228505	-0.189205	0.149825	-0.0273784	-0.033318	0.0513183	0.0478898	-0.019774	0.0795888	0.0512491	0.038786	-0.0376576	0.136536	-0.181696	-0.102685	-0.11338	-0.223283	0.194308	-0.168464	0.0944076	0.059205	-0.21167	-0.186631	-0.196622	0.208475	-0.034504
Progesterone-mediated_oocyte_maturation	-0.345866	-0.257685	-0.294464	-0.24309	-0.23694	-0.319682	-0.135416	-0.103575	-0.274666	-0.279474	-0.115323	-0.228564	-0.0554615	-0.20159	0.0342217	-0.323197	-0.0714187	-0.0654395	-0.22625	-0.0207586	0.0640836	-0.197255	-0.0611349	-0.0466398	-0.294363	-0.0655164	-0.14719	-0.128864	0.0196491	-0.0767397	-0.230049	0.0227371	-0.0806821	-0.0623033	-0.117351	-0.0183442	-0.268923	-0.194203	-0.252022	-0.337054	-0.00403655	-0.287256	-0.195298	-0.0766254	-0.313986	-0.288221	-0.323836	0.065414	-0.151016
Proteasome	0.355269	0.395584	0.379819	0.409411	0.379678	0.367554	0.413126	0.382726	0.395406	0.355046	0.414267	0.368358	0.370212	0.42127	0.44408	0.368138	0.408495	0.386965	0.380528	0.405278	0.425524	0.380741	0.417348	0.373184	0.416062	0.434799	0.380892	0.411775	0.405176	0.402876	0.384204	0.413785	0.435386	0.384363	0.402856	0.413567	0.397801	0.460478	0.376289	0.348427	0.391638	0.363805	0.355434	0.383847	0.387717	0.368954	0.368767	0.492292	0.397421
Pyrimidine_metabolism	-0.179573	-0.102364	-0.115155	-0.0632305	-0.0718474	-0.157677	0.0132217	-0.032879	-0.0819077	-0.13406	-0.0175926	-0.0887127	0.0335045	-0.0595785	0.102026	-0.18614	0.114604	-0.00798658	-0.0909743	0.0464404	0.182492	-0.0527919	-0.00650732	0.005862	-0.0765229	0.00890127	-0.0614032	-0.0343389	0.0991142	0.0326266	-0.0706745	0.109526	0.0201706	0.130254	-0.0370747	0.0238079	-0.119255	-0.0243074	-0.0569845	-0.184164	0.203326	-0.163199	0.0355183	0.0339033	-0.180648	-0.165125	-0.161796	0.130576	-0.0498131
Spliceosome	0.283937	0.287917	0.318563	0.295563	0.295287	0.32634	0.326075	0.336662	0.314857	0.319581	0.371971	0.343821	0.327602	0.286754	0.351065	0.27741	0.356122	0.343968	0.297137	0.330184	0.373818	0.300314	0.334957	0.339343	0.352858	0.307671	0.308138	0.289896	0.361573	0.334038	0.350783	0.406837	0.344399	0.336728	0.311902	0.369154	0.310542	0.319204	0.306427	0.250014	0.372609	0.289034	0.308459	0.334671	0.303697	0.273956	0.272401	0.404591	0.330197
Viral_carcinogenesis	-0.0929267	-0.0418022	-0.0984526	-0.0229133	-0.0665202	-0.119911	0.0284795	0.0371577	-0.0468008	-0.064536	0.0645588	-0.0449854	0.0653496	-0.0345542	0.175964	-0.103933	0.0590941	0.0512485	-0.0424108	0.190436	0.183198	-0.0105052	0.0815432	0.0484048	-0.0910555	0.221957	0.0345893	0.0402136	0.141219	0.10352	0.0923591	0.135814	0.110633	0.0905407	0.0155946	0.201215	-0.0800282	-0.0207642	-0.0452006	-0.115096	0.230952	-0.0827078	0.105242	0.134005	-0.116173	-0.0994942	-0.109461	0.246613	0.0132524
[truncated: 1,520 more columns]
