# Supplementary material for: Identification of fatty acid-related subtypes, the establishment of a prognostic signature, and immune infiltration characteristics in lung adenocarcinoma
Source: Aging (Albany NY). 2023 May 16;15(10):4202–35. doi: 10.18632/aging.204725 (PMC10258028; doi:10.18632/aging.204725)
Supplement: Supplementary Table 19 [file aging-15-204725-s018.xlsx]

## Sheet: Sheet1
Supplementary Table 19. GSVA HALLMARK PATHWAYS results for different FA score groups.
ID	TCGA_TCGA.55.8615	TCGA_TCGA.86.8674	TCGA_TCGA.50.6590	TCGA_TCGA.62.A471	TCGA_TCGA.NJ.A7XG	TCGA_TCGA.91.6848	TCGA_TCGA.55.6986	TCGA_TCGA.73.4677	TCGA_TCGA.69.8253	TCGA_TCGA.MP.A4T8	TCGA_TCGA.55.6970	TCGA_TCGA.86.8359	TCGA_TCGA.44.7667	TCGA_TCGA.55.8302	TCGA_TCGA.64.1679	TCGA_TCGA.50.6595	TCGA_TCGA.55.6968	TCGA_TCGA.50.6594	TCGA_TCGA.MP.A4TF	TCGA_TCGA.38.4632	TCGA_TCGA.86.8075	TCGA_TCGA.69.7760	TCGA_TCGA.64.1677	TCGA_TCGA.97.8174	TCGA_TCGA.MP.A4SY	TCGA_TCGA.55.7726	TCGA_TCGA.L9.A8F4	TCGA_TCGA.49.AAQV	TCGA_TCGA.91.6847	TCGA_TCGA.MP.A4TA	TCGA_TCGA.49.AARN	TCGA_TCGA.55.5899	TCGA_TCGA.MP.A4TC	TCGA_TCGA.55.8203	TCGA_TCGA.50.6591	TCGA_TCGA.44.7670	TCGA_TCGA.05.5425	TCGA_TCGA.49.6745	TCGA_TCGA.86.7711	TCGA_TCGA.50.8459	TCGA_TCGA.50.5045	TCGA_TCGA.05.4396	TCGA_TCGA.55.6975	TCGA_TCGA.78.7150	TCGA_TCGA.55.8614	TCGA_TCGA.78.8655	TCGA_TCGA.44.7662	TCGA_TCGA.97.8547	TCGA_TCGA.78.7166
HALLMARK_ADIPOGENESIS	0.00052404	0.146898	-0.161187	0.0132499	-0.0635469	-0.129936	0.0418015	0.34887	0.151623	0.170574	0.363405	-0.291439	0.0524443	-0.0658892	0.102007	0.126649	-0.259131	0.125338	-0.106127	0.042421	0.0893682	-0.122025	-0.18073	0.094977	-0.0852152	0.00671637	-0.316463	-0.267333	-0.0653875	0.0820391	-0.27069	0.358975	-0.0650158	-0.260914	-0.244673	-0.0831565	0.196112	0.374919	0.188063	-0.171732	-0.103546	0.186329	0.295924	0.345684	-0.149252	0.0240894	-0.151372	-0.0837024	-0.258789
HALLMARK_ALLOGRAFT_REJECTION	-0.562164	-0.552055	0.397327	-0.413611	-0.494542	0.371248	-0.00838563	-0.168386	-0.341323	-0.559688	0.14912	0.236884	-0.473173	-0.076035	-0.198703	-0.0619149	0.18217	-0.232305	-0.502487	0.364209	-0.302021	-0.440595	0.174752	-0.0497773	-0.520564	-0.251596	0.421333	-0.014163	-0.580026	-0.0431574	-0.24518	-0.366109	0.0249018	0.340925	-0.603611	-0.503846	0.460164	0.408254	-0.0356782	0.385028	0.645159	-0.500617	-0.323361	-0.42587	-0.403185	0.087238	-0.0307259	-0.309673	-0.0593415
HALLMARK_ANDROGEN_RESPONSE	-0.400209	-0.116952	-0.233221	-0.140874	-0.107245	-0.0495405	0.154523	0.145103	-0.0670211	-0.195749	0.227176	-0.176634	-0.325648	-0.393316	0.305047	0.0893799	-0.21795	-0.157689	-0.158599	0.0757618	0.20876	-0.069638	-0.176049	-0.157946	-0.228972	0.172042	-0.156035	-0.340759	-0.000587382	-0.237157	-0.413501	-0.347357	-0.129071	0.0122784	-0.0250813	0.17406	0.184347	0.128687	0.220146	-0.288899	-0.0406245	-0.0362705	0.107831	0.144398	0.0731995	0.12983	-0.143881	-0.261067	-0.129174
HALLMARK_ANGIOGENESIS	0.0821355	-0.0814657	-0.452551	-0.581045	0.18491	-0.358901	0.294588	0.493127	0.366888	-0.269066	0.218739	0.138178	-0.582984	-0.33612	0.162483	0.0217181	-0.333795	-0.0378075	-0.1718	-0.0149537	-0.306678	0.207	-0.0506842	0.425727	-0.00246993	-0.474656	-0.270755	0.0591163	-0.614521	-0.402991	-0.300459	0.284589	-0.144176	-0.126443	-0.122542	-0.0864203	0.28927	-0.148534	-0.00371087	0.200296	0.272918	0.08	0.0226159	-0.328088	0.010194	-0.000336349	-0.122467	0.404356	-0.175509
HALLMARK_APICAL_JUNCTION	-0.0347197	-0.24312	0.0155434	-0.114517	-0.0156554	0.137308	0.0154021	-0.0671231	0.0506116	0.0265483	-0.184057	-0.2326	-0.209382	0.0794992	0.210872	0.299889	-0.257051	-0.0520433	-0.303274	0.0254357	0.229331	-0.0382689	-0.381308	0.142907	-0.0215916	0.200587	-0.0668068	-0.140832	-0.237364	0.0266193	0.231551	-0.268474	0.281283	-0.261054	-0.170466	-0.117091	-0.0589383	0.0792494	-0.165651	0.479731	0.207226	-0.257306	0.172758	-0.288959	0.252511	0.045849	0.247991	0.153488	-0.132498
HALLMARK_APICAL_SURFACE	0.335996	0.384547	0.22382	0.0423674	-0.128842	-0.0387464	-0.12995	0.13557	0.184027	0.473491	-0.206151	0.112601	0.335672	-0.224835	-0.278975	-0.16945	-0.0897485	-0.452519	0.103484	-0.30808	-0.280577	-0.447635	-0.0336061	0.188493	-0.596586	-0.150473	0.322541	-0.254482	0.265631	-0.0428933	-0.322815	-0.557345	-0.197541	0.330995	0.128118	0.198679	0.318719	-0.439352	0.103194	-0.0422646	-0.102078	0.0726799	0.00204513	-0.155705	-0.00452487	-0.0997073	-0.418695	-0.284337	0.0268635
HALLMARK_APOPTOSIS	-0.376104	-0.182186	-0.0168697	-0.269414	-0.0519286	0.155595	0.000693663	0.0988202	0.0894549	-0.362256	-0.288849	0.159989	-0.176617	-0.113541	0.343331	0.126696	-0.108858	0.215697	-0.130148	0.0391793	0.329969	-0.104535	-0.272372	0.0137943	0.159315	0.29445	-0.28974	-0.0710487	-0.174242	0.103704	-0.173996	0.0299913	0.141839	-0.351969	-0.307815	-0.354365	-0.275949	0.189748	0.210203	0.13478	0.0881541	-0.146099	0.0310036	-0.0759341	-0.0971194	0.0338352	0.204061	0.327393	-0.270324
HALLMARK_BILE_ACID_METABOLISM	-0.283113	-0.0897071	-0.268223	-0.117741	-0.100202	-0.346264	-0.301255	-0.0273754	-0.336114	-0.27822	-0.228638	-0.452286	-0.264208	-0.33588	-0.1928	-0.390426	-0.240844	-0.2503	-0.158189	-0.051695	-0.213213	0.12894	0.0676603	0.0622461	-0.185322	0.187824	-0.241751	0.144323	-0.0347986	0.20085	0.142414	-0.0658621	-0.261769	-0.156881	-0.298145	0.0590372	0.0573058	-0.401751	0.0759189	0.070633	0.260943	0.0529961	-0.26803	-0.00311586	-0.0536329	-0.123484	-0.268688	0.0931267	0.281875
HALLMARK_CHOLESTEROL_HOMEOSTASIS	0.102997	0.561231	-0.288594	0.0849324	0.33444	-0.742939	-0.336584	0.359004	0.457872	0.319444	-0.412802	0.0682782	0.192518	-0.0711594	-0.237497	-0.522156	-0.459668	-0.0982424	-0.272793	0.272735	-0.3207	-0.520155	-0.0716541	-0.459692	-0.412749	-0.392304	-0.141219	0.202248	0.178924	0.496618	0.23922	0.11283	0.281596	-0.290309	-0.153022	-0.242967	0.163179	-0.630353	0.0160786	-0.122772	-0.411102	-0.0463011	0.135727	0.324315	0.354534	-0.311958	0.365459	0.103375	0.463374
HALLMARK_COAGULATION	0.377374	0.236199	-0.357121	0.077844	0.0597157	-0.420708	-0.108817	0.0694327	0.107281	0.44842	-0.323554	0.310109	-0.371704	0.323509	-0.119442	-0.293537	-0.372278	-0.0992193	0.0508392	0.315305	-0.226599	0.322405	-0.0150056	0.0649687	0.022129	-0.160249	0.0542928	0.255013	-0.155221	0.308695	0.254874	-0.0279666	-0.0674949	0.166137	-0.283686	-0.398037	0.0106457	-0.236561	-0.0808829	0.23776	0.316068	0.187165	-0.221923	-0.138413	0.154159	-0.18425	-0.0861301	0.241577	0.362982
HALLMARK_COMPLEMENT	-0.389727	-0.511724	0.22647	-0.21393	-0.49773	0.310773	-0.283654	-0.23506	-0.255004	-0.465439	0.0520606	-0.0805174	-0.251147	-0.0297528	-0.049669	0.118305	0.259221	-0.0782251	-0.22096	-0.0319945	0.134696	-0.063546	0.130784	0.0845365	-0.144458	0.0775266	-0.0408065	-0.11429	-0.433422	-0.0167358	-0.106685	0.0744779	0.0671811	-0.0173107	-0.431525	-0.107727	0.121361	0.301317	-0.0846738	0.269601	0.294927	-0.269021	-0.189596	-0.0976589	-0.228375	-0.21804	-0.0329368	-0.11548	-0.194265
HALLMARK_DNA_REPAIR	0.0755136	0.343833	-0.30862	0.201409	0.254184	-0.0186222	0.0486556	-0.09814	0.115692	0.131974	-0.236454	-0.199668	0.38569	0.320671	-0.146989	0.211716	-0.0540016	0.31375	0.349405	0.280411	-0.077148	0.163169	0.395291	-0.263837	0.289779	-0.183992	-0.0751012	0.238494	0.342946	0.378076	0.0272426	0.227344	0.0234179	-0.0956999	0.329968	0.221073	0.274102	-0.309748	-0.316675	-0.445718	0.0867822	-0.0222941	0.158697	0.00676061	0.170715	0.282129	0.208769	-0.0555574	-0.0307415
HALLMARK_E2F_TARGETS	-0.168336	-0.114738	0.50437	0.55176	-0.494384	0.520424	-0.40898	-0.610651	-0.54876	0.12053	0.236783	-0.501697	0.716718	0.347209	-0.151037	0.436529	0.573881	0.398452	0.354902	0.417519	0.174994	0.323009	0.576166	-0.579371	0.0598043	0.39425	0.313819	0.0903306	0.614831	0.508421	-0.439453	0.543267	0.314989	0.0297977	0.629303	0.468042	0.30561	0.218464	0.272214	-0.601729	-0.273146	-0.188161	0.449901	0.443683	0.208289	-0.396845	0.462881	-0.301348	0.140303
HALLMARK_EPITHELIAL_MESENCHYMAL_TRANSITION	-0.0504615	-0.286458	0.531039	-0.307506	-0.629127	0.605635	-0.349874	-0.446723	-0.449319	0.385915	-0.321296	0.207336	-0.241772	-0.277248	0.601559	0.631566	-0.20336	-0.268635	-0.331641	0.0790795	0.553008	0.0199841	-0.286173	-0.00760493	0.498939	0.609716	0.162392	-0.412477	-0.145672	-0.326826	-0.15936	0.221386	0.573258	0.300335	0.281457	-0.29801	0.152719	0.401702	0.328561	0.750822	0.613629	-0.448351	0.659287	0.307471	0.409242	-0.386583	0.540046	0.569158	0.031342
HALLMARK_ESTROGEN_RESPONSE_EARLY	0.201765	-0.0446806	-0.199534	-0.0443434	0.283016	-0.178143	0.067312	0.220715	0.0932646	0.348079	0.1493	0.251581	-0.157049	-0.150495	-0.028019	-0.255133	-0.051694	-0.230848	-0.0884535	-0.172341	0.142423	-0.0447952	-0.257689	0.244141	0.0969083	-0.0255289	-0.0337161	0.207978	0.0427658	-0.0873269	0.184838	-0.0985271	-0.0584618	0.0773542	-0.144046	0.0324933	-0.0783328	0.0737613	0.0296595	0.130035	-0.212679	0.198498	0.0393384	-0.0988775	-0.0234056	-0.0351937	-0.21568	-0.00997216	-0.00908338
HALLMARK_ESTROGEN_RESPONSE_LATE	0.304973	0.309863	-0.148518	0.0873951	0.374176	-0.430152	-0.107556	0.285585	0.342554	0.368154	-0.0848455	0.306628	-0.165393	-0.0220399	-0.266286	-0.156388	-0.289133	-0.319544	-0.065813	-0.0845556	-0.373258	0.0787862	0.262829	-0.207289	-0.305083	-0.107127	-0.0857313	-0.0182218	-0.216767	0.0817491	0.102431	-0.0888449	-0.0530791	0.201197	-0.38346	-0.0858112	0.322554	-0.0288996	-0.273959	-0.175525	-0.186573	0.0825497	-0.146552	0.0374211	-0.047034	-0.0155622	-0.289822	-0.100383	0.320807
HALLMARK_FATTY_ACID_METABOLISM	-0.0411811	0.394677	-0.35616	0.0533977	0.00622691	-0.398176	0.0464726	0.519587	0.357543	-0.250084	0.155239	-0.17255	-0.122832	0.0494765	-0.290756	-0.342783	-0.286217	-0.137663	-0.388799	0.123093	-0.198818	-0.276286	0.240136	0.287131	-0.365381	-0.137988	-0.385149	-0.121957	0.00860208	-0.288741	-0.294764	0.138169	-0.4225	-0.0564375	-0.2934	-0.185997	0.208271	0.0128582	-0.0359703	-0.206545	-0.0119201	-0.0559058	-0.288742	0.202748	-0.080503	0.0511138	-0.431639	0.024285	0.172877
HALLMARK_G2M_CHECKPOINT	-0.113121	-0.129615	0.378682	0.287852	-0.303127	0.475957	-0.15816	-0.397225	-0.343785	0.34094	0.195537	-0.068595	0.515472	0.141522	0.145018	0.38744	0.577922	0.161251	0.508549	-0.224593	0.134568	-0.0698855	0.120216	-0.359667	0.193993	0.426691	0.272113	-0.103368	0.545885	0.35466	-0.153096	0.281411	-0.0420342	0.125237	0.584805	0.492099	-0.123378	0.287957	0.112347	-0.534578	-0.4477	0.296349	0.375136	0.295284	0.428917	0.022969	0.369007	-0.305591	-0.209141
HALLMARK_GLYCOLYSIS	0.223256	0.212852	-0.284898	0.243976	-0.0290122	-0.243304	0.139445	-0.0298657	0.0621402	0.214063	-0.130768	0.241667	-0.208634	0.356276	0.226697	-0.0269248	-0.138035	0.401302	-0.0631039	0.345391	0.347531	0.248065	0.112229	-0.431729	0.15364	-0.253378	-0.140022	0.216663	0.0441429	0.316555	0.191477	0.12919	0.167983	0.109076	-0.199817	-0.20671	0.163414	0.152783	0.176555	-0.283441	-0.157354	0.160737	0.0501652	0.28037	-0.164313	0.134573	0.0141796	0.296669	0.237943
HALLMARK_HEDGEHOG_SIGNALING	-0.319539	-0.260344	-0.221827	-0.275611	0.014731	0.210065	0.254875	-0.0445051	-0.291919	0.11969	0.0167932	-0.115206	-0.472978	-0.352175	0.244436	0.107841	0.211489	-0.610407	-0.64049	-0.356773	0.320964	0.0940915	-0.501655	0.49389	0.371907	0.46882	0.0291985	-0.202593	-0.105478	-0.661398	0.219457	0.0642854	0.39517	-0.157649	0.0324606	0.0542968	-0.591411	-0.0882115	0.0597086	0.595474	0.151854	0.257262	0.236929	-0.476249	-0.0974305	-0.169563	0.063472	0.42188	-0.0831808
HALLMARK_HEME_METABOLISM	-0.0398344	-0.102224	-0.169613	-0.0530142	0.211145	-0.0820989	-0.0663849	0.178078	-0.0218256	-0.0434844	0.0482352	-0.104863	-0.15077	-0.0125038	0.00485586	-0.194187	-0.12236	0.0244759	-0.197855	-0.102452	-0.0882363	0.000519523	-0.301594	0.205489	-0.123272	-0.0255897	-0.150592	-0.046778	-0.0690063	-0.225201	-0.00488518	-0.111705	-0.307727	0.0632711	-0.195085	0.0629333	-0.170754	-0.0146411	-0.0541471	-0.0652469	-0.0819425	0.0568647	-0.122218	-0.093378	-0.14399	0.132628	-0.269737	-0.0438813	-0.201126
HALLMARK_HYPOXIA	0.337167	-0.121542	-0.0894809	0.23392	-0.12948	0.0527974	-0.0290743	-0.104016	-0.0578051	0.0592636	-0.102245	0.164199	-0.232037	0.239418	0.167551	0.0475944	-0.0220735	-0.309771	-0.0573429	-0.0270887	0.0468166	0.0590257	-0.154056	-0.0249537	0.0969135	0.179545	0.153717	0.00481332	-0.00874253	-0.198556	-0.124908	-0.0437064	0.319299	0.276129	0.0299558	0.0109326	-0.105204	-0.0953729	0.00141878	0.361838	0.155664	0.0975109	0.00367626	0.00466205	0.21044	-0.235245	0.15856	0.258774	0.144097
HALLMARK_IL2_STAT5_SIGNALING	-0.259032	-0.289432	0.133837	-0.165047	-0.120518	0.323308	-0.0443012	0.0466914	0.0541493	-0.203276	0.197393	0.336826	-0.326824	0.074186	-0.0693304	0.149711	-0.294538	-0.079765	-0.210406	0.0704919	0.0641714	-0.237488	-0.152795	-0.00461363	-0.138482	0.106885	-0.0404988	-0.0390967	-0.180415	-0.402214	-0.242797	-0.151794	0.272268	0.199894	-0.274292	-0.328304	0.0447642	0.33403	-0.169129	0.368936	0.313045	-0.128123	0.0652098	-0.267626	-0.0476827	0.149711	0.191353	0.146625	-0.110452
HALLMARK_IL6_JAK_STAT3_SIGNALING	-0.112415	-0.351546	-0.0686864	-0.282145	-0.217022	0.172981	-0.343936	-0.382109	-0.363037	-0.204564	-0.457884	-0.153251	-0.330419	-0.394953	-0.121644	-0.299686	-0.0753378	-0.537383	-0.529728	-0.453927	-0.294446	-0.033235	-0.364373	-0.00790561	-0.32095	-0.195912	-0.121945	-0.487459	-0.49118	-0.416916	-0.341812	-0.201525	-0.152684	-0.336442	-0.282877	-0.260244	-0.151458	0.0126175	0.19254	0.172443	0.146973	-0.065366	-0.188645	-0.264667	-0.513526	0.0547357	-0.378128	-0.045504	-0.0758528
HALLMARK_INFLAMMATORY_RESPONSE	-0.268795	-0.562446	0.197727	-0.46649	-0.540114	0.348875	-0.259919	-0.296095	-0.269182	-0.368352	0.0130871	0.209105	-0.519412	-0.307941	-0.072581	0.0690788	-0.0682858	-0.439663	-0.430217	0.321838	0.254183	-0.26132	0.0143445	-0.0387092	-0.342751	0.103486	0.0138072	-0.00897351	-0.650387	-0.316117	-0.320423	-0.1649	-0.0372792	-0.0267562	-0.601031	-0.357134	0.358122	0.28662	0.34746	0.471906	0.55055	-0.449534	-0.276659	-0.500994	-0.266641	-0.193585	0.0685582	0.107213	-0.217945
HALLMARK_INTERFERON_ALPHA_RESPONSE	-0.706113	-0.521598	-0.167724	-0.0247184	-0.358568	-0.639274	-0.382513	-0.330419	-0.44753	-0.286988	0.115348	-0.152182	-0.693471	0.534834	-0.180686	0.785644	-0.452644	0.0423016	-0.0809198	-0.29926	0.48583	-0.2209	0.0659672	-0.0884562	-0.0267833	-0.2732	-0.685166	0.169642	-0.077853	0.482	0.583626	-0.572963	0.0872513	-0.366822	-0.679421	0.179805	0.450477	0.319108	-0.270643	0.0478309	0.448789	0.11624	-0.00477683	-0.458699	-0.616034	0.257914	0.27422	-0.137577	-0.3174
HALLMARK_INTERFERON_GAMMA_RESPONSE	-0.509559	-0.563505	0.313498	-0.351423	-0.386819	-0.109079	-0.542296	-0.363126	-0.433561	-0.553316	0.198942	0.283408	-0.51457	0.524161	-0.183879	0.411159	-0.122345	-0.0914529	-0.266203	0.116753	0.0255053	-0.218652	0.316456	-0.287834	-0.487391	-0.257065	0.0111441	0.284462	-0.603082	-0.0658181	0.245802	-0.467551	0.393465	0.135197	-0.677075	-0.621422	0.474056	0.481121	-0.271954	0.176404	0.494888	-0.358595	-0.439922	-0.62883	-0.384388	0.172482	0.346519	0.0366892	-0.284379
HALLMARK_KRAS_SIGNALING_DN	0.287208	0.0738574	-0.0120338	0.109872	0.154157	-0.271908	-0.172723	0.0454863	0.0288872	-0.163531	-0.265891	0.0715931	-0.0830005	0.151503	-0.029038	-0.318211	0.119368	-0.0826855	-0.311219	-0.0797313	-0.304969	0.256424	0.0818724	0.00706225	-0.195425	0.0887642	0.300857	0.262644	-0.222982	-0.0659993	0.263286	0.0754747	-0.0972276	0.194334	-0.169526	0.023841	-0.168553	-0.395517	-0.133942	0.295717	0.212886	-0.110899	-0.0916551	-0.139731	0.161073	-0.288189	-0.114277	0.169427	0.432299
HALLMARK_KRAS_SIGNALING_UP	-0.219428	-0.366709	-0.114643	-0.312764	-0.296738	0.179401	0.070173	0.0488951	-0.0369775	-0.342725	0.0665924	-0.0115709	-0.312489	-0.205013	-0.0553975	0.108504	-0.0133906	-0.0964805	-0.090492	0.0731404	0.218181	-0.113613	-0.108294	0.128943	-0.0545244	0.281408	-0.250205	-0.284404	-0.277126	-0.275644	-0.032272	0.0535937	-0.0418552	-0.139874	-0.254121	-0.271923	0.182626	0.258082	0.0660427	0.315185	0.336024	-0.0300536	0.0805338	-0.203123	-0.26204	0.112628	-0.133283	0.0951628	-0.0282862
HALLMARK_MITOTIC_SPINDLE	0.00911438	-0.0258568	0.0904061	0.0756833	0.156217	0.291268	0.00959674	-0.1601	-0.024757	0.13981	0.150023	0.00225758	0.235705	0.175606	0.324267	0.123037	0.268721	0.0590377	0.356615	-0.4518	0.285999	-0.217193	-0.462831	0.11793	0.213308	0.142671	-0.0535381	-0.240057	0.528554	-0.0172271	-0.0369849	-0.0831961	0.271651	-0.179921	0.366731	0.270493	-0.385352	0.301043	0.046932	-0.00794151	-0.468979	0.101631	0.20787	0.233593	0.236274	0.196466	0.269973	0.0313954	-0.342047
HALLMARK_MTORC1_SIGNALING	-0.27057	0.178236	0.184563	0.334788	-0.102006	0.456101	0.321819	-0.0782997	0.210081	0.431758	0.00342591	-0.152586	0.404374	-0.264385	-0.0833532	0.404825	0.150458	0.368265	0.304121	0.396481	0.248765	0.30734	0.418928	-0.548801	0.104198	0.319862	-0.170781	0.34301	0.455389	0.420806	-0.148705	0.194961	0.365441	0.238184	0.351178	0.2519	0.276013	0.273559	0.359339	-0.626905	0.111797	-0.0765631	0.462225	0.269781	-0.258126	0.0416749	0.266686	-0.00233347	-0.0245063
HALLMARK_MYC_TARGETS_V1	0.0698156	0.404843	0.25232	0.445696	0.138609	0.427873	0.513748	0.0419939	0.164857	0.366755	0.13125	-0.0815974	0.659942	0.0711065	0.0045108	0.543253	0.267667	0.313927	0.10783	0.41143	-0.24608	0.148755	0.536449	-0.431661	-0.0104822	0.220601	0.097929	-0.0275549	0.527564	-0.0262704	-0.220865	0.329663	0.0678275	0.173785	0.559811	0.473149	0.454619	0.339796	0.0640233	-0.631701	-0.00399747	-0.304696	0.364743	0.458542	0.0525944	0.244948	0.071642	-0.51403	-0.0179044
HALLMARK_MYC_TARGETS_V2	0.110634	0.556918	0.529349	0.40338	0.417481	0.596803	0.655876	-0.279781	0.589978	0.682106	0.135503	0.265938	0.707187	-0.025284	-0.287278	0.573125	0.0670087	0.397775	0.311152	0.074632	-0.3249	0.0968396	0.459339	-0.593936	0.505441	0.116154	0.336448	0.47875	0.490847	0.522255	0.103592	0.419419	0.196199	0.0261278	0.416609	0.470426	0.164043	0.189009	0.441993	-0.633343	-0.257811	-0.228637	0.478339	0.454088	0.473394	0.340141	0.149048	0.122883	-0.00900126
HALLMARK_MYOGENESIS	0.0227445	-0.0828732	-0.0438495	-0.196301	-0.0504431	-0.0437062	-0.301574	-0.205438	0.0706168	-0.0343796	-0.393693	-0.269382	-0.118192	-0.019427	0.106621	-0.136261	-0.0359811	-0.0621271	-0.425772	0.0233263	-0.0334115	0.0612383	-0.0216096	-0.0143928	-0.0269712	-0.0958089	0.412434	0.110684	-0.217402	-0.200717	0.0784844	-0.151638	0.123668	-0.0856531	-0.211603	-0.26108	-0.29483	-0.299218	-0.177859	0.510948	0.459182	-0.379938	0.136692	-0.243093	0.243944	-0.265781	0.11879	0.211392	0.289073
HALLMARK_NOTCH_SIGNALING	-0.456425	0.177421	-0.308216	-0.219406	-0.0794777	-0.299977	-0.264689	0.304178	0.400566	-0.0909992	-0.0699379	-0.0856154	-0.500644	-0.36877	0.384623	0.142794	-0.621185	-0.0964675	-0.27328	0.0682629	0.372812	0.0468459	-0.38415	0.372982	-0.155826	0.131625	-0.186407	-0.307497	-0.240691	-0.452575	0.368649	-0.656214	-0.108949	-0.095142	-0.134613	0.0682634	0.114237	-0.124683	-0.0238065	0.282378	0.0414178	-0.111081	0.420985	0.0512675	-0.127673	0.12482	0.459216	0.0464178	-0.0363578
HALLMARK_OXIDATIVE_PHOSPHORYLATION	0.181485	0.468215	-0.199238	0.52022	0.247953	-0.147386	0.244279	0.400792	0.409277	-0.087547	0.280609	-0.1043	0.337648	-0.139885	-0.376575	-0.00195635	-0.0892834	0.451905	-0.186654	0.552219	-0.432543	0.0507116	0.517746	-0.249797	-0.333483	-0.27202	-0.388681	0.321159	0.0252678	0.213879	-0.266008	0.493849	-0.24526	-0.174636	0.0343834	-0.0149663	0.549131	-0.204327	-0.079455	-0.561011	0.434965	-0.0298025	0.0859345	0.4815	-0.37791	0.13231	-0.243603	-0.338992	0.210211
HALLMARK_P53_PATHWAY	-0.0739375	0.164168	-0.175911	0.194659	0.217994	-0.123723	0.254903	0.155069	0.187157	-0.304797	-0.00618405	-0.0495625	-0.24465	0.120315	-0.16077	0.00375992	-0.229055	-0.0104157	0.0557455	-0.0746493	0.0908446	-0.100638	0.0861038	-0.127983	0.355607	0.0101875	-0.176553	-0.10653	0.19799	0.0787726	0.118148	-0.26324	-0.041241	-0.2868	-0.1619	0.149444	-0.0235594	0.1901	-0.147799	0.00989892	-0.117868	-0.234726	-0.156298	-0.0887174	0.180129	0.380876	-0.158011	0.156958	0.0886778
HALLMARK_PANCREAS_BETA_CELLS	0.534567	0.461965	0.00746942	0.357183	-0.0620393	-0.116225	0.0550184	0.458499	0.408832	0.26182	0.338831	0.311148	0.244636	-0.342335	-0.275371	-0.167437	0.5304	0.00797084	0.082806	0.162162	-0.466254	0.45103	0.289624	0.0188129	-0.424371	0.228313	-0.18102	0.143172	0.0800753	-0.140168	0.692148	0.500766	-0.361064	0.408588	-0.0196857	0.215981	0.331905	-0.45196	-0.0940624	0.160797	0.228554	0.289373	-0.0308129	0.0557918	-0.340086	-0.348218	-0.436634	-0.00379534	0.57406
HALLMARK_PEROXISOME	0.0947134	0.287398	0.155688	-0.208763	0.543792	-0.308423	-0.148199	0.203834	0.166297	0.239156	-0.304286	0.12131	0.00580579	-0.0505596	-0.102364	-0.236395	-0.15519	0.253984	0.278461	0.334098	0.0152135	0.0875949	0.302903	-0.290441	0.204402	-0.0673201	-0.0490137	0.496351	-0.17905	-0.0793226	0.173467	-0.269765	0.0267787	0.307863	0.111937	0.128907	0.153956	-0.0656319	0.133498	0.0243391	0.326513	-0.0551502	-0.318072	-0.0143253	0.016057	-0.0161848	-0.318221	0.246785	-0.0448189
HALLMARK_PI3K_AKT_MTOR_SIGNALING	0.0871421	-0.0840012	-0.225893	0.310403	-0.0728876	-0.0249078	-0.199562	-0.0181351	-0.00155742	0.177357	0.285763	0.226427	0.196649	-0.0384903	0.270163	0.0679035	-0.114866	0.131358	0.148725	0.0777466	-0.238865	0.123889	0.190226	0.180906	-0.126663	-0.00540687	-0.35178	-0.174017	0.117333	0.021854	-0.158231	0.292964	-0.172438	-0.14065	0.0768943	0.128281	0.396132	0.096523	0.209188	-0.256732	-0.179311	0.356851	0.328601	0.366629	-0.357564	-0.185842	-0.231678	-0.383095	-0.319213
HALLMARK_PROTEIN_SECRETION	-0.238717	0.150473	-0.481683	-0.126413	0.0398136	-0.220428	0.343577	0.495115	0.11835	-0.0846241	0.330897	0.0557815	-0.278429	-0.239327	0.193182	-0.0208147	-0.291156	0.459621	0.298742	0.167218	0.220083	0.189713	-0.188709	0.129037	0.0828893	0.117494	-0.544472	-0.319114	0.124952	-0.36527	-0.313377	0.0661925	-0.214594	-0.25513	0.0438697	-0.0229842	0.140116	0.161341	0.00246965	-0.411023	-0.336869	0.438813	-0.00262753	0.353753	-0.335668	-0.234724	-0.261785	-0.234365	-0.32699
HALLMARK_REACTIVE_OXYGEN_SPECIES_PATHWAY	0.0559017	0.33736	0.178366	0.0945637	0.0415218	-0.0936972	0.24632	0.181611	0.445226	0.323244	-0.160429	-0.0533249	-0.258023	-0.0566577	0.0728969	0.28972	0.0650851	-0.0677768	-0.461884	0.101654	-0.263832	-0.477491	-0.319232	0.00233878	0.0414084	-0.426165	-0.0407903	0.281018	-0.280984	-0.477934	-0.156115	0.0430938	0.285937	-0.0864023	-0.36663	-0.377552	-0.322108	0.215037	-0.194207	0.265939	0.105983	-0.56947	-0.381247	-0.542476	-0.3397	0.284867	-0.0492272	0.388661	0.185141
HALLMARK_SPERMATOGENESIS	0.206184	-0.0899317	0.0299135	-0.0596092	-0.11456	0.0656346	-0.323349	-0.102881	-0.19646	-0.232359	-0.138824	-0.152851	0.126971	-0.166727	-0.241366	-0.36087	0.379219	0.108374	-0.0377607	0.000471005	-0.271564	0.214795	0.218507	-0.0407493	-0.267801	-0.0848997	0.109245	0.0889314	0.0278038	0.209555	-0.144524	0.0250604	-0.281185	-0.128352	0.0908334	0.264768	-0.173164	-0.276612	0.10053	-0.00773991	0.0379496	-0.0447304	-0.226886	0.0342529	0.00899454	-0.327348	-0.168976	-0.262531	0.147376
HALLMARK_TGF_BETA_SIGNALING	-0.132337	0.323421	0.0230797	-0.126215	0.00969401	-0.178028	0.436632	0.00997922	0.183414	0.318267	0.254551	0.0977995	-0.37461	0.0223029	0.219054	0.482677	-0.237654	-0.467046	0.197093	-0.210222	0.57019	0.360899	-0.332094	0.487956	0.168105	0.432038	-0.621537	-0.592461	0.214648	-0.632527	-0.076381	-0.353085	0.130488	-0.168487	0.301955	-0.386786	-0.493723	0.160565	-0.0382433	0.207769	-0.0933265	0.391204	0.363847	0.219011	0.388311	0.506769	0.206414	-0.198164	-0.441058
HALLMARK_TNFA_SIGNALING_VIA_NFKB	-0.180488	0.115409	0.273121	-0.0327434	-0.135467	0.330075	-0.116453	-0.0513892	0.207003	0.179268	-0.058266	0.490542	-0.388815	-0.021284	0.155866	0.2413	-0.409263	-0.117371	-0.105272	0.199555	0.438489	-0.134814	-0.222062	-0.342197	0.110684	0.200304	0.143208	-0.257558	-0.445594	0.37813	-0.101352	-0.501924	0.309244	-0.172808	-0.329932	0.274102	0.120516	0.306793	0.392223	0.299427	0.386877	-0.360899	0.235853	0.103316	0.32512	0.0523223	0.31378	-0.219494	0.0334253
HALLMARK_UNFOLDED_PROTEIN_RESPONSE	0.200623	0.42213	0.139432	0.345753	0.271672	0.3565	0.397714	0.138328	0.23689	0.360053	0.260702	0.287333	0.409504	-0.0381488	0.0628343	0.302777	0.00384192	0.40034	0.410297	-0.00508466	-0.177441	0.191076	0.0824453	-0.195085	0.208254	-0.0727752	0.157717	0.093233	0.243185	0.269139	-0.16285	0.0112946	-0.0272635	0.263844	0.332613	0.359068	0.258373	0.0927906	0.0122248	-0.430457	-0.332056	0.188921	0.137366	0.287221	0.126448	0.107293	0.0859483	-0.167277	-0.301052
HALLMARK_UV_RESPONSE_DN	-0.164708	-0.276816	-0.11175	-0.545468	0.12317	0.259331	0.121201	0.161219	0.0951772	-0.186854	-0.0736172	-0.286328	-0.33434	-0.318758	0.325522	0.0826739	0.052283	-0.0854735	0.0756718	-0.502161	0.425981	0.117312	-0.49793	0.391401	0.182408	0.198265	-0.0919396	-0.251355	0.162033	-0.389225	-0.144919	-0.341003	-0.11324	-0.191215	0.30013	-0.303179	-0.431492	0.254013	-0.150572	0.251289	-0.457065	0.210837	-0.0405765	-0.0444335	0.15812	-0.146526	0.0714377	0.00330957	-0.362831
HALLMARK_UV_RESPONSE_UP	-0.111247	0.143825	0.0688663	-0.258111	0.0713289	0.135744	-0.0280477	0.171158	0.137889	0.0369216	0.0234148	0.077931	-0.0336318	0.0248238	-0.0908379	0.0661547	0.0926331	0.0604207	0.123009	0.238971	-0.0131419	0.00386295	0.263303	0.0667276	0.172701	-0.226495	-0.0557848	0.264424	0.0471455	0.0586948	0.101347	0.200136	0.0102018	-0.266268	0.207241	0.22468	0.172491	0.0816677	0.161325	-0.0206501	0.028547	0.0510229	-0.011072	-0.106433	-0.119144	0.21553	0.101661	0.110336	-0.13338
HALLMARK_WNT_BETA_CATENIN_SIGNALING	0.307361	0.574803	0.0553832	0.153914	0.395352	0.00631522	-0.105266	-0.119874	0.550833	0.383098	0.167846	0.365826	0.131086	-0.0131671	0.020492	-0.387705	-0.0157309	-0.368019	0.251547	-0.29991	-0.145016	-0.235919	-0.512124	0.17186	-0.0316723	-0.186548	0.46609	0.303993	0.317549	0.403999	0.178234	-0.0909311	-0.0831073	0.35583	0.220233	0.225821	0.0190542	-0.322759	-0.0891276	0.397234	-0.43203	0.221456	-0.155857	-0.0246628	0.347437	0.235937	-0.0521924	0.0487211	0.479738
HALLMARK_XENOBIOTIC_METABOLISM	0.0458517	0.279932	-0.256224	0.339123	0.187531	-0.277794	-0.169157	0.194785	0.184753	0.03338	0.060716	0.070723	-0.291384	0.133603	-0.191062	-0.253109	-0.313383	0.282839	-0.149831	-0.042384	-0.311762	0.123117	0.157458	-0.118084	0.0931306	-0.257757	-0.0354012	0.304619	-0.0761688	0.31646	0.248125	0.329045	-0.178287	0.0382184	-0.323118	-0.27802	0.143034	-0.311794	0.10091	0.0248487	0.0357225	0.0484871	0.0561499	0.0349085	-0.0511166	-0.219368	-0.194372	0.140693	0.312017
[truncated: 1,520 more columns]
