# Supplementary material for: Identification of fatty acid-related subtypes, the establishment of a prognostic signature, and immune infiltration characteristics in lung adenocarcinoma
Source: Aging (Albany NY). 2023 May 16;15(10):4202–35. doi: 10.18632/aging.204725 (PMC10258028; doi:10.18632/aging.204725)
Supplement: Supplementary Table 20 [file aging-15-204725-s019.xlsx]

## Sheet: Sheet1
Supplementary Table 20. GSEA HALLMARK PATHWAYS results for different FA score groups.
ID	Description	setSize	enrichmentScore	NES	pvalue	p.adjust	qvalues	rank	leading_edge	core_enrichment
E2F_TARGETS	E2F_TARGETS	181	0.779817	2.96885	1e-10	8.33333e-10	5.78947e-10	1318	tags=58%, list=12%, signal=52%	CENPE/MYBL2/DLGAP5/DEPDC1/CDCA8/MELK/CDCA3/PLK4/CDC20/E2F8/KIF4A/BIRC5/CHEK1/SPC25/MAD2L1/CDKN3/HMMR/HELLS/AURKB/DIAPH3/BUB1B/RRM2/KIF18B/CDC25A/KIF2C/PLK1/RAD51AP1/TOP2A/CCNE1/UBE2S/MKI67/TRIP13/MCM4/ESPL1/CDK1/DSCC1/AURKA/CCNB2/CENPM/GINS1/SPAG5/BRCA1/ORC6/GINS4/TK1/EZH2/TACC3/ASF1B/RACGAP1/SPC24/GINS3/MCM2/PTTG1/ATAD2/BRCA2/LMNB1/HMGA1/TIPIN/CKS2/KPNA2/MCM6/MTHFD2/POLA2/RFC3/PAICS/CKS1B/NCAPD2…
G2M_CHECKPOINT	G2M_CHECKPOINT	184	0.766992	2.92539	1e-10	8.33333e-10	5.78947e-10	990	tags=47%, list=9%, signal=43%	CDC45/CENPE/KIF23/MYBL2/PBK/EXO1/NEK2/TTK/NDC80/PLK4/CDC20/KIF4A/BIRC5/CDC6/CHEK1/RAD54L/TPX2/MAD2L1/BUB1/KIF15/GINS2/CDKN3/HMMR/CENPF/AURKB/CCNA2/CDC25A/KIF2C/PLK1/TOP2A/TROAP/UBE2S/MKI67/POLQ/KIF11/ESPL1/CDK1/UBE2C/AURKA/CENPA/TRAIP/CCNB2/ORC6/EZH2/TACC3/PRC1/RACGAP1/KIF20B/DBF4/FBXO5/STIL/MCM2/SLC7A5/PTTG1/NUSAP1/E2F1/BRCA2/LMNB1/HMGA1/CCNF/CKS2/KPNA2/MCM6/INCENP/POLA2/E2F2/PTTG3P/DTYMK/RBL1/S…
MYC_TARGETS_V2	MYC_TARGETS_V2	55	0.743933	2.41213	1e-10	8.33333e-10	5.78947e-10	2359	tags=82%, list=21%, signal=65%	PLK4/PLK1/MCM4/BYSL/MCM5/RRP9/PUS1/NOC4L/NOP16/NIP7/UNG/NOLC1/HSPD1/EXOSC5/SRM/PES1/IPO4/WDR43/AIMP2/MRTO4/TCOF1/HK2/HSPE1/MYC/SLC19A1/PHB/SORD/CDK4/NOP2/WDR74/GRWD1/UTP20/CBX3/RRP12/PA2G4/PRMT3/TBRG4/RABEPK/NPM1/NDUFAF4/FARSA/DDX18/IMP4/MPHOSPH10/DCTPP1
MYC_TARGETS_V1	MYC_TARGETS_V1	181	0.612242	2.33088	1e-10	8.33333e-10	5.78947e-10	3174	tags=63%, list=28%, signal=46%	CDC45/CDC20/MAD2L1/CCNA2/MCM4/MCM2/TYMS/RFC4/KPNA2/MCM6/MCM5/NME1/MCM7/RRP9/CDK2/PCNA/SNRPD1/PGK1/NCBP1/NOP16/CAD/RANBP1/CCT5/SRPK1/SNRPA1/RAN/ABCE1/NOLC1/RRM1/PSMD14/CSTF2/HPRT1/HSPD1/PPM1G/PSMC4/RUVBL2/SRM/XPOT/LDHA/AIMP2/VDAC1/CYC1/BUB3/CCT7/CCT4/HDAC2/POLD2/MRPL9/CCT2/HSPE1/SNRPD2/MYC/ACP1/SSBP1/PHB/EIF3J/PRPF31/CDK4/PSMD3/DDX21/ILF2/POLE3/EIF2S2/CBX3/EIF4E/UBA2/PSMD8/PSMB3/PWP1/EIF3B/IFRD1/P…
MTORC1_SIGNALING	MTORC1_SIGNALING	187	0.591852	2.25997	1e-10	8.33333e-10	5.78947e-10	2706	tags=55%, list=24%, signal=42%	BUB1/RRM2/CDC25A/PLK1/MCM4/SLC2A1/AURKA/STC1/SLC7A11/EGLN3/PLOD2/ELOVL6/PSAT1/MCM2/SLC7A5/PDK1/MLLT11/CCNF/MTHFD2/GCLC/TUBG1/YKT6/NAMPT/TXNRD1/PSPH/DDIT4/TRIB3/POLR3G/G6PD/RRP9/FADS2/SRD5A1/TOMM40/SHMT2/PHGDH/PGK1/TPI1/UNG/GAPDH/PSME3/SLC2A3/GMPS/TUBA4A/GPI/DHFR/NUP205/ACLY/PSMD14/PNP/HPRT1/HSPD1/DDX39A/PNO1/PSMC4/ALDOA/ENO1/LDHA/HMBS/MTHFD2L/EEF1E1/P4HA1/CCT6A/IGFBP5/STIP1/HK2/HSPE1/PDAP1/GBE1/P…
MITOTIC_SPINDLE	MITOTIC_SPINDLE	179	0.590875	2.24378	1e-10	8.33333e-10	5.78947e-10	1238	tags=24%, list=11%, signal=22%	CENPE/KIF23/DLGAP5/NEK2/TTK/NDC80/KIF4A/BIRC5/TPX2/BUB1/KIF15/CENPF/KIF2C/PLK1/TOP2A/KIF11/ESPL1/CDK1/AURKA/CCNB2/ECT2/PRC1/RACGAP1/KIF20B/FBXO5/FSCN1/NUSAP1/KNTC1/BRCA2/LMNB1/INCENP/WASF1/KIF3C/RHOF/RASAL2/SAC3D1/BCL2L11/CEP72/TUBA4A/MYO1E/PDLIM5/TLK1/CKAP5
EPITHELIAL_MESENCHYMAL_TRANSITION	EPITHELIAL_MESENCHYMAL_TRANSITION	186	0.537123	2.05167	4.06382e-09	2.90273e-08	2.01663e-08	1952	tags=46%, list=17%, signal=38%	COL11A1/GREM1/PTHLH/SPOCK1/MMP1/ADAM12/COL7A1/DKK1/MFAP5/MMP3/PLOD2/LOX/CXCL6/TFPI2/LAMC2/LOXL2/SLC6A8/CDH2/LRRC15/LAMA1/APLP1/PLAUR/MMP14/FAP/INHBA/VCAN/POSTN/COL5A2/PRSS2/VEGFC/NID2/SNAI2/THBS2/COL5A3/BMP1/PDLIM4/RGS4/COL1A1/PFN2/SERPINE1/MCM7/SPP1/FBN2/IGFBP3/COL5A1/SERPINE2/CALU/MXRA5/IL6/GPC1/CXCL1/TGFBI/ITGA5/COL3A1/THY1/PVR/ENO2/PMEPA1/MEST/SCG2/COL1A2/BASP1/ITGB3/TNC/DST/VEGFA/GAS1/OXTR/T…
GLYCOLYSIS	GLYCOLYSIS	182	0.522007	1.98636	5.11473e-08	3.19671e-07	2.22087e-07	2299	tags=42%, list=21%, signal=34%	GPR87/DEPDC1/HMMR/KIF20A/CDK1/PKP2/AURKA/ANGPTL4/CENPA/STC1/STC2/EGLN3/PLOD2/PPFIA4/PFKP/DSC2/ARTN/B3GNT3/SPAG4/GCLC/PYGL/LDHC/VCAN/FKBP4/EFNA3/SLC25A10/BIK/DDIT4/IGFBP3/G6PD/COL5A1/GPC1/GALK1/TGFBI/PGK1/HOMER1/TGFA/SRD5A3/STMN1/RPE/TPI1/TPBG/ENO2/KIF2A/PGAM1/CHST1/B4GALT1/PSMC4/ALDOA/ENO1/LDHA/FAM162A/VEGFA/B4GALT4/P4HA1/HK2/SAP30/GOT1/GAPDHS/MIF/SLC25A13/PLOD1/CHPF/KDELR3/CHST4/CHPF2/NSDHL/GMPP…
UNFOLDED_PROTEIN_RESPONSE	UNFOLDED_PROTEIN_RESPONSE	101	0.559112	1.97739	2.10806e-06	1.17114e-05	8.13636e-06	2854	tags=48%, list=25%, signal=36%	IGFBP1/STC2/PSAT1/SLC7A5/EIF4EBP1/MTHFD2/CKS1B/CHAC1/EXOSC2/DDIT4/RRP9/FKBP14/NOLC1/EXOSC5/XPOT/EIF4A3/VEGFA/EXOSC9/DDX10/LSM4/EXOSC4/SRPRB/CEBPG/KDELR3/YWHAZ/ASNS/EIF4E/LSM1/ALDH18A1/NPM1/YIF1A/POP4/EIF2S1/PREB/EXOSC1/WIPI1/HSPA9/EIF4G1/PAIP1/GOSR2/HSP90B1/PDIA6/NFYA/BANF1/ARFGAP1/NOP14/NHP2/SHC1
SPERMATOGENESIS	SPERMATOGENESIS	121	0.526887	1.91425	3.97033e-06	1.98516e-05	1.37917e-05	1051	tags=26%, list=9%, signal=23%	NEK2/NCAPH/TTK/BUB1/CDKN3/KIF2C/CDK1/AURKA/CCNB2/CLGN/EZH2/RPL39L/IL12RB2/DBF4/YBX2/SCG3/SCG5/RFC4/CLPB/GAD1/LDHC/SLC2A5/GRM8/THEG/HSPA4L/DMRT1/TNNI3/TOPBP1/CCNA1/ADAM2/NEFH
HYPOXIA	HYPOXIA	182	0.457628	1.74139	4.11728e-05	0.000187149	0.000130019	1852	tags=34%, list=17%, signal=28%	IGFBP1/INHA/SLC2A1/ANGPTL4/STC1/STC2/PKP1/LOX/HOXB9/PPFIA4/PFKP/PCK1/PDK1/EDN2/SULT2B1/ADM/PLAUR/TMEM45A/LDHC/SLC2A5/EFNA3/SERPINE1/CHST3/DDIT4/IGFBP3/COL5A1/IL6/CA12/FOSL2/GPC1/GALK1/TGFBI/PGK1/TPI1/GAPDH/TPBG/SLC2A3/ENO2/GPI/BCAN/PLIN2/MT2A/ALDOA/ENO1/LDHA/FAM162A/VEGFA/P4HA1/F3/TGM2/HK2/SAP30/GBE1/TES/GAPDHS/MIF/JMJD6/SCARB1/AKAP12/KDELR3/SLC6A6
BILE_ACID_METABOLISM	BILE_ACID_METABOLISM	99	-0.495547	-1.83531	5.03155e-05	0.000206291	0.000143318	1700	tags=33%, list=15%, signal=29%	SCP2/SLC29A1/SERPINA6/HSD17B4/DHCR24/ABCA4/GC/HSD17B11/CYP46A1/ABCD2/EFHC1/NR1I2/CYP7A1/TFCP2L1/CAT/ABCA5/AR/ACSL5/TTR/CH25H/RXRG/CYP27A1/CYP39A1/ALDH1A1/ABCA6/EPHX2/GNMT/DIO1/NR3C2/ABCA3/HSD17B6/ABCA8/NR0B2
MYOGENESIS	MYOGENESIS	195	-0.414484	-1.67484	5.36355e-05	0.000206291	0.000143318	1400	tags=26%, list=12%, signal=23%	SH3BGR/ABLIM1/MYOM1/TNNC2/GNAO1/HSPB2/MYOM2/GPX3/MAPRE3/NCAM1/RYR1/HRC/CASQ1/ACHE/MYH2/CKMT2/ITGA7/SOD3/CTF1/DMD/LAMA2/PVALB/MYH3/LDB3/MEF2C/PPP1R3C/FABP3/HSPB8/AK1/REEP1/ADCY9/CD36/CAV3/PYGM/APOD/SORBS1/MYH1/CFD/MYOZ1/CLU/ACTN2/FHL1/FXYD1/DAPK2/VIPR1/DES/SGCA/MYH11/CASQ2/SGCG/TNNC1
DNA_REPAIR	DNA_REPAIR	126	0.467241	1.70302	0.000378896	0.0013532	0.000940119	3135	tags=48%, list=28%, signal=35%	CDA/RAD51/ZWINT/TYMS/RFC4/FEN1/POLA2/RFC3/PRIM1/ADA/TAF13/RFC2/NME1/RFC5/SAC3D1/PCNA/POLD1/GTF3C5/RPA3/PNP/LIG1/HPRT1/RALA/NUDT21/POLA1/UMPS/ADRM1/TAF6/ERCC2/POLR2D/SSRP1/TMED2/RAE1/POLR2H/NME4/ERCC8/POLR2K/NCBP2/POLR2J/TARBP2/POLR2I/CANT1/GTF2A2/SNAPC5/AAAS/GTF2H3/DGUOK/NT5C/CCNO/SEC61A1/ERCC1/CSTF3/MRPL40/POLD3/DAD1/POLD4/UPF3B/RNMT/ARL6IP1/TAF12
ESTROGEN_RESPONSE_LATE	ESTROGEN_RESPONSE_LATE	190	0.393216	1.50431	0.00220827	0.0073609	0.00511389	1109	tags=23%, list=10%, signal=21%	GJB3/PLK4/CDC20/CDC6/GINS2/NMU/TOP2A/GAL/KIF20A/TRIM29/TFF1/CYP4F11/S100A9/TFPI2/SLC16A1/LAMC2/STIL/SLC7A5/XRCC3/SULT2B1/PLAC1/SLC27A2/PTGES/CPE/KRT13/FKBP4/SERPINA5/TH/RNASEH2A/HSPA4L/CYP26B1/FKBP5/OPN3/CA12/DNAJC12/PERP/PPIF/PKP3/CCNA1/TPBG/MEST/KRT19/PRSS23
FATTY_ACID_METABOLISM	FATTY_ACID_METABOLISM	142	-0.363926	-1.41973	0.00847179	0.0264743	0.0183927	1708	tags=19%, list=15%, signal=16%	PTPRG/ADH7/HSD17B4/CYP1A1/ACADS/DHCR24/HSD17B11/ALDH3A2/HSDL2/EPHX1/ALDH3A1/MGLL/LTC4S/MAOA/ACSL5/CA2/CD36/AOC3/HPGD/ALDH1A1/ACSM3/XIST/CA4/GPD1/HMGCS2/ADH1C/ACADL
TNFA_SIGNALING_VIA_NFKB	TNFA_SIGNALING_VIA_NFKB	191	0.336675	1.28933	0.0393701	0.115794	0.0804466	2073	tags=28%, list=18%, signal=23%	FOSL1/SPHK1/KYNU/TNFAIP6/CXCL6/DUSP4/PLAU/CCL20/CXCL11/PLAUR/CXCL10/INHBA/FJX1/LAMB3/GFPT2/NAMPT/IL1A/SERPINE1/IL23A/MSC/CLCF1/TNFRSF9/PHLDA2/IL6/FOSL2/CXCL1/RIPK2/MXD1/SERPINB8/SLC2A3/PMEPA1/PANX1/PDLIM5/TNC/B4GALT1/TAP1/VEGFA/F3/DUSP5/LIF/MYC/GADD45A/RELB/G0S2/PTGS2/DDX58/IFIH1/DNAJB4/GCH1/IL15RA/MARCKS/IER5/TGIF1
