# Supplementary material for: Identification of fatty acid-related subtypes, the establishment of a prognostic signature, and immune infiltration characteristics in lung adenocarcinoma
Source: Aging (Albany NY). 2023 May 16;15(10):4202–35. doi: 10.18632/aging.204725 (PMC10258028; doi:10.18632/aging.204725)
Supplement: Supplementary Table 21 [file aging-15-204725-s020.xlsx]

## Sheet: Sheet1
Supplementary Table 21. IPS of TCGA cohort.
ID	ips_ctla4_neg_pd1_neg	ips_ctla4_neg_pd1_pos	ips_ctla4_pos_pd1_neg	ips_ctla4_pos_pd1_pos
TCGA-55-8092	10	10	10	10
TCGA-55-1596	10	8	9	8
TCGA-64-1680	10	8	9	8
TCGA-49-6742	10	8	9	7
TCGA-49-4506	10	9	9	9
TCGA-05-4396	10	8	9	8
TCGA-95-7948	10	9	10	8
TCGA-97-8171	10	8	9	7
TCGA-05-4422	10	10	10	10
TCGA-50-6597	10	9	9	9
TCGA-67-6217	10	9	10	9
TCGA-64-5778	10	10	10	10
TCGA-62-8397	10	9	9	8
TCGA-L9-A50W	10	8	9	8
TCGA-78-7153	10	8	9	7
TCGA-78-7539	10	9	10	9
TCGA-44-2659	10	9	9	9
TCGA-J2-A4AE	10	9	10	9
TCGA-55-A48X	9	9	9	9
TCGA-67-3774	9	8	8	8
TCGA-64-5781	9	9	9	9
TCGA-38-4631	9	7	8	7
TCGA-55-6980	9	8	9	8
TCGA-NJ-A7XG	9	7	9	7
TCGA-73-4677	9	8	8	7
TCGA-MN-A4N5	9	9	9	9
TCGA-49-AARN	9	8	8	7
TCGA-05-5425	9	9	9	9
TCGA-49-4494	9	8	8	8
TCGA-55-6712	9	9	8	9
TCGA-05-4397	9	8	9	8
TCGA-50-5044	9	9	9	8
TCGA-95-7947	9	8	8	8
TCGA-62-8394	9	8	9	8
TCGA-73-7499	9	9	9	9
TCGA-64-1677	9	9	9	9
TCGA-49-4507	9	8	9	8
TCGA-80-5608	9	7	8	7
TCGA-49-4486	9	8	9	7
TCGA-05-5429	9	8	9	7
TCGA-78-7147	9	8	9	7
TCGA-78-7148	9	8	8	7
TCGA-75-5147	9	8	9	8
TCGA-50-5932	9	7	8	7
TCGA-55-6984	9	8	8	7
TCGA-78-7542	9	9	8	9
TCGA-78-7166	9	8	8	7
TCGA-55-A492	9	7	8	6
TCGA-55-A4DG	9	8	9	8
TCGA-O1-A52J	9	8	8	8
TCGA-53-7813	9	7	9	7
TCGA-62-8402	9	9	9	9
TCGA-50-8460	9	8	9	8
TCGA-L9-A444	9	9	9	9
TCGA-91-8497	9	8	9	8
TCGA-71-6725	9	7	8	6
TCGA-97-7552	9	9	9	9
TCGA-50-5944	9	7	8	7
TCGA-50-5935	9	8	9	8
TCGA-75-5146	9	7	8	7
TCGA-75-6212	9	8	9	8
TCGA-69-7764	9	8	9	8
TCGA-67-3773	9	9	9	8
TCGA-38-A44F	9	8	9	8
TCGA-78-7149	9	7	8	6
TCGA-S2-AA1A	9	8	9	8
TCGA-86-6851	9	9	9	9
TCGA-78-7540	9	8	8	7
TCGA-49-4501	9	8	9	8
TCGA-44-2655	9	8	9	8
TCGA-49-4505	9	8	8	8
TCGA-50-5068	9	8	9	8
TCGA-86-8076	9	8	9	8
TCGA-MP-A4SW	9	8	8	7
TCGA-78-7162	9	8	9	8
TCGA-55-7284	9	8	8	8
TCGA-95-8039	9	8	8	8
TCGA-44-6146	9	8	9	7
TCGA-64-1681	9	8	9	8
TCGA-97-A4M7	9	8	9	8
TCGA-97-A4M1	9	8	9	7
TCGA-86-8280	9	9	9	9
TCGA-44-2657	9	9	9	9
TCGA-49-4510	9	7	8	7
TCGA-97-A4M0	9	9	9	9
TCGA-49-AAR2	9	8	9	8
TCGA-44-2666	9	8	8	7
TCGA-50-5942	9	7	8	7
TCGA-55-8619	9	8	8	8
TCGA-69-7761	9	9	9	9
TCGA-MP-A4TH	9	8	9	8
TCGA-NJ-A55R	9	7	9	7
TCGA-53-A4EZ	9	8	9	7
TCGA-NJ-A4YG	9	7	8	7
TCGA-78-7158	9	7	8	7
TCGA-55-7573	9	8	9	8
TCGA-78-7163	9	8	8	7
TCGA-55-8085	9	9	9	9
TCGA-67-3772	9	8	9	7
TCGA-78-7537	9	8	9	7
TCGA-75-7025	9	7	8	7
TCGA-55-7914	9	8	9	8
TCGA-78-7152	9	8	9	8
TCGA-44-7659	9	7	8	7
TCGA-05-4433	9	8	8	8
TCGA-93-A4JN	9	8	8	8
TCGA-50-8457	9	8	9	8
TCGA-67-3770	9	8	9	8
TCGA-91-6840	9	8	8	7
TCGA-49-4488	9	8	8	8
TCGA-97-7941	9	7	8	7
TCGA-50-5055	9	9	9	9
TCGA-55-7283	9	8	8	7
TCGA-05-4403	9	8	8	7
TCGA-75-6214	8	8	8	7
TCGA-L4-A4E5	8	7	8	7
TCGA-MP-A4T4	8	9	8	9
TCGA-93-A4JP	8	8	8	7
TCGA-55-6982	8	7	8	7
TCGA-50-5930	8	7	8	7
TCGA-55-A57B	8	7	8	7
TCGA-95-7567	8	7	8	7
TCGA-93-A4JO	8	7	7	7
TCGA-44-7672	8	8	8	8
TCGA-NJ-A4YP	8	7	8	7
TCGA-69-8253	8	7	8	6
TCGA-86-8358	8	7	8	7
TCGA-MP-A4T7	8	6	7	6
TCGA-49-AAR9	8	7	8	6
TCGA-86-8074	8	7	7	7
TCGA-75-7027	8	6	7	6
TCGA-38-4625	8	9	8	8
TCGA-69-7763	8	7	8	6
TCGA-55-7911	8	8	8	8
TCGA-55-8511	8	8	8	8
TCGA-97-8179	8	7	8	6
TCGA-50-5939	8	8	8	7
TCGA-50-5931	8	6	7	5
TCGA-62-A471	8	7	8	6
TCGA-83-5908	8	9	8	9
TCGA-44-5643	8	7	8	7
TCGA-73-A9RS	8	8	8	7
TCGA-L9-A5IP	8	7	7	7
TCGA-62-8398	8	7	7	7
TCGA-55-6986	8	7	7	6
TCGA-50-5066	8	8	8	8
TCGA-J2-A4AD	8	7	8	6
TCGA-86-8674	8	6	7	6
TCGA-49-6744	8	8	8	7
TCGA-50-5072	8	7	7	6
TCGA-MP-A4TF	8	8	8	8
TCGA-99-8033	8	8	8	8
TCGA-55-7574	8	8	9	8
TCGA-95-7562	8	7	7	7
TCGA-86-8278	8	7	7	6
TCGA-49-AAQV	8	8	8	7
TCGA-55-8614	8	7	8	7
TCGA-78-8655	8	7	7	7
TCGA-MP-A4TA	8	7	8	7
TCGA-55-5899	8	7	8	7
TCGA-55-8203	8	7	8	7
TCGA-50-6591	8	6	7	5
TCGA-44-7670	8	7	8	7
TCGA-95-7944	8	9	8	9
TCGA-50-8459	8	7	7	7
TCGA-86-8672	8	8	8	8
TCGA-78-7160	8	7	8	7
TCGA-50-5941	8	9	8	9
TCGA-97-8175	8	7	8	7
TCGA-55-8505	8	6	7	5
TCGA-67-6215	8	7	7	6
TCGA-86-6562	8	7	7	6
TCGA-49-4490	8	7	9	7
TCGA-44-A4SS	8	8	8	8
TCGA-05-4250	8	8	8	8
TCGA-86-A4JF	8	8	8	8
TCGA-95-8494	8	7	7	7
TCGA-MP-A4SV	8	8	8	8
TCGA-93-A4JQ	8	8	8	8
TCGA-05-4402	8	6	7	6
TCGA-49-AAR4	8	8	8	8
TCGA-55-7903	8	7	7	7
TCGA-44-A47A	8	8	9	8
TCGA-55-6970	8	8	8	7
TCGA-69-7760	8	6	7	6
TCGA-97-8174	8	7	8	7
TCGA-55-8302	8	8	8	8
TCGA-91-8499	8	7	7	7
TCGA-53-7624	8	8	8	8
TCGA-62-A46Y	8	7	7	7
TCGA-91-6830	8	7	7	7
TCGA-35-5375	8	7	7	7
TCGA-44-6145	8	9	8	9
TCGA-55-7994	8	9	8	9
TCGA-55-8094	8	7	8	6
TCGA-05-4425	8	8	7	7
TCGA-35-3615	8	7	8	7
TCGA-MN-A4N4	8	7	8	6
TCGA-L9-A743	8	8	8	8
TCGA-78-7154	8	7	8	6
TCGA-05-4418	8	8	8	8
TCGA-44-7671	8	6	7	5
TCGA-95-7039	8	7	7	7
TCGA-55-8508	8	7	8	7
TCGA-55-1595	8	7	7	7
TCGA-95-A4VK	8	7	8	7
TCGA-50-5045	8	8	8	8
TCGA-38-6178	8	7	8	7
TCGA-93-8067	8	7	8	7
TCGA-69-7980	8	8	8	8
TCGA-55-7913	8	6	7	6
TCGA-55-6975	8	7	7	6
TCGA-78-7150	8	6	7	6
TCGA-38-4627	8	7	7	6
TCGA-44-6779	8	9	8	8
TCGA-38-4628	8	6	7	6
TCGA-55-6985	8	7	8	7
TCGA-97-A4M6	8	8	8	8
TCGA-05-5423	8	7	8	7
TCGA-97-A4M2	8	7	8	7
TCGA-55-A4DF	8	8	8	8
TCGA-05-4426	8	8	7	7
TCGA-71-8520	8	7	8	7
TCGA-MP-A4TD	8	7	8	6
TCGA-05-4430	8	7	7	7
TCGA-49-AAR0	8	7	8	7
TCGA-L9-A443	8	7	8	7
TCGA-67-4679	8	7	8	7
TCGA-44-2656	8	9	8	9
TCGA-78-7633	8	7	8	6
TCGA-55-6642	8	7	8	7
TCGA-91-A4BD	8	7	8	7
TCGA-64-5779	8	7	8	7
TCGA-97-7546	8	8	8	7
TCGA-55-8512	8	6	7	6
TCGA-73-4662	8	8	8	8
TCGA-55-7576	8	7	8	7
TCGA-86-7954	8	8	8	7
TCGA-97-8177	8	7	8	7
TCGA-MP-A5C7	8	6	7	5
TCGA-MP-A4TJ	8	8	8	9
TCGA-99-8025	8	7	8	6
TCGA-55-A48Z	8	8	8	7
TCGA-78-7161	8	6	8	6
TCGA-44-6147	8	7	8	7
TCGA-78-8640	8	7	7	6
TCGA-91-6849	8	6	7	6
TCGA-62-A46P	8	7	8	6
TCGA-55-8510	8	8	8	8
TCGA-99-7458	8	8	8	8
TCGA-99-8028	8	8	8	9
TCGA-97-7554	8	8	8	8
TCGA-50-5049	8	8	8	8
TCGA-49-AARQ	8	7	8	7
TCGA-49-AARR	8	8	8	7
TCGA-50-6673	8	7	8	6
TCGA-97-8552	8	6	7	6
TCGA-91-7771	8	8	8	8
TCGA-86-8668	8	8	8	7
TCGA-44-2661	8	8	9	8
TCGA-44-6776	8	7	8	6
TCGA-44-A47G	8	9	8	9
TCGA-55-7728	8	7	7	7
TCGA-62-A46R	8	7	8	8
TCGA-86-8671	8	9	8	9
TCGA-55-6972	8	6	7	6
TCGA-44-5645	8	7	8	7
TCGA-62-A46S	8	7	8	6
TCGA-64-1676	8	8	8	8
TCGA-78-7156	8	6	8	6
TCGA-86-8669	8	7	8	7
TCGA-55-7227	8	8	8	8
TCGA-99-8032	8	7	8	7
TCGA-50-7109	8	7	7	6
TCGA-NJ-A55O	8	7	8	7
TCGA-05-5420	8	9	8	9
TCGA-38-7271	8	9	8	9
TCGA-55-8621	8	8	7	7
TCGA-86-A456	8	8	8	7
TCGA-86-7714	8	7	8	6
TCGA-78-7143	8	7	8	7
TCGA-55-6983	8	7	8	7
TCGA-L9-A7SV	8	6	7	6
TCGA-55-8620	8	7	8	7
TCGA-69-8255	8	8	8	8
TCGA-97-A4M3	8	6	7	6
TCGA-78-8648	8	8	8	8
TCGA-62-8395	8	6	7	5
TCGA-MP-A4T6	8	7	8	7
TCGA-97-A4M5	8	8	8	7
TCGA-97-7547	8	7	7	6
TCGA-86-A4P8	8	8	8	8
TCGA-91-8496	8	8	8	7
TCGA-55-7281	8	7	7	6
TCGA-44-3919	8	8	8	8
TCGA-91-A4BC	8	8	8	8
TCGA-49-4514	8	7	8	7
TCGA-73-7498	8	7	7	6
TCGA-NJ-A55A	8	7	8	7
TCGA-55-7727	8	7	8	7
TCGA-95-A4VP	8	7	8	8
TCGA-86-A4P7	8	7	8	7
TCGA-99-AA5R	8	8	9	9
TCGA-53-7626	8	8	8	8
TCGA-69-8453	8	7	8	7
TCGA-50-5051	8	6	7	6
TCGA-J2-A4AG	8	7	8	7
TCGA-97-A4LX	8	8	8	8
TCGA-93-7347	8	8	8	8
TCGA-69-7765	8	7	8	7
TCGA-49-4487	8	8	8	8
TCGA-55-8097	8	7	8	6
TCGA-55-7725	8	8	8	8
TCGA-44-A4SU	8	7	8	7
TCGA-55-6969	8	7	7	7
TCGA-69-8254	8	8	8	7
TCGA-73-4668	8	7	8	7
TCGA-97-8172	8	7	7	7
TCGA-67-6216	8	7	8	7
TCGA-97-7938	8	7	8	7
TCGA-05-4432	8	7	7	7
TCGA-55-8301	8	9	8	9
TCGA-86-8073	8	6	7	6
TCGA-05-4389	8	8	8	8
TCGA-55-8513	8	7	7	6
TCGA-55-1592	8	6	7	6
TCGA-93-7348	8	6	8	6
TCGA-55-8616	8	7	8	7
TCGA-86-8055	7	7	7	6
TCGA-J2-8192	7	6	7	6
TCGA-95-A4VN	7	8	7	8
TCGA-44-3396	7	8	7	8
TCGA-05-4420	7	6	7	5
TCGA-69-7974	7	7	6	7
TCGA-35-4122	7	8	7	8
TCGA-44-7669	7	7	7	7
TCGA-73-4666	7	8	7	8
TCGA-49-6761	7	7	7	7
TCGA-86-7955	7	5	6	5
TCGA-67-3771	7	6	7	6
TCGA-73-4670	7	6	7	6
TCGA-86-8054	7	5	6	5
TCGA-55-8089	7	8	8	8
TCGA-50-6590	7	8	7	8
TCGA-44-5644	7	5	6	5
TCGA-38-4629	7	8	7	7
TCGA-55-A48Y	7	6	7	6
TCGA-97-8176	7	6	7	5
TCGA-55-7724	7	6	7	6
TCGA-J2-8194	7	6	6	5
TCGA-55-8299	7	8	7	8
TCGA-86-8585	7	7	7	7
TCGA-91-6848	7	7	7	7
TCGA-55-8615	7	5	6	4
TCGA-55-6968	7	7	7	7
TCGA-50-6594	7	9	7	8
TCGA-MP-A4T8	7	6	7	5
TCGA-97-8547	7	6	7	6
TCGA-78-8662	7	5	6	5
TCGA-55-7726	7	6	7	6
TCGA-L9-A8F4	7	7	7	7
TCGA-55-6981	7	6	7	6
TCGA-38-4632	7	7	7	7
TCGA-86-8075	7	6	7	6
TCGA-55-8205	7	8	7	8
TCGA-91-6836	7	7	7	6
TCGA-73-4676	7	7	7	6
TCGA-91-6847	7	6	6	5
TCGA-MP-A4TC	7	7	7	7
TCGA-44-7662	7	7	7	7
TCGA-95-7043	7	5	6	5
TCGA-49-6745	7	8	7	8
TCGA-38-4630	7	6	7	6
TCGA-05-4434	7	8	7	8
TCGA-MP-A4TI	7	8	7	8
TCGA-69-7973	7	6	7	6
TCGA-49-6767	7	7	7	7
TCGA-64-1678	7	5	7	5
TCGA-MP-A4TK	7	6	7	6
TCGA-62-A46V	7	5	7	5
TCGA-35-4123	7	8	7	8
TCGA-MP-A4T9	7	7	7	7
TCGA-44-2665	7	7	7	7
TCGA-64-5774	7	6	7	6
TCGA-78-7220	7	6	7	5
TCGA-55-8204	7	7	7	6
TCGA-MN-A4N1	7	6	7	5
TCGA-78-8660	7	7	7	7
TCGA-55-8090	7	7	7	7
TCGA-86-8359	7	6	7	6
TCGA-78-7145	7	6	6	5
TCGA-MP-A4SY	7	6	6	6
TCGA-64-1679	7	6	6	5
TCGA-55-6978	7	8	7	8
TCGA-50-6595	7	7	6	7
TCGA-86-A4D0	7	6	7	6
TCGA-49-AAR3	7	8	7	8
TCGA-NJ-A4YF	7	5	6	5
TCGA-55-6979	7	8	7	8
TCGA-69-A59K	7	7	7	7
TCGA-44-4112	7	6	7	6
TCGA-69-7979	7	6	6	5
TCGA-64-5815	7	6	7	6
TCGA-73-4675	7	5	6	5
TCGA-44-2668	7	8	8	8
TCGA-86-8673	7	6	7	6
TCGA-50-5946	7	6	7	5
TCGA-50-5936	7	6	6	5
TCGA-62-A472	7	7	7	7
TCGA-80-5611	7	6	7	6
TCGA-62-A46O	7	5	7	5
TCGA-44-7661	7	8	7	8
TCGA-73-4659	7	6	6	5
TCGA-49-AARE	7	6	7	6
TCGA-86-7701	7	7	7	7
TCGA-55-7570	7	5	7	6
TCGA-44-3398	7	7	7	7
TCGA-44-6774	7	6	6	6
TCGA-05-4382	7	7	6	6
TCGA-44-6777	7	7	6	6
TCGA-55-8096	7	6	6	5
TCGA-97-7553	7	7	7	7
TCGA-44-6775	7	6	7	6
TCGA-55-8506	7	6	7	6
TCGA-78-7535	7	5	6	5
TCGA-86-8056	7	6	7	6
TCGA-05-4249	7	6	7	6
TCGA-38-4626	7	6	6	6
TCGA-L4-A4E6	7	7	7	7
TCGA-86-8279	7	5	7	5
TCGA-NJ-A4YI	7	6	6	6
TCGA-55-6987	7	8	8	8
TCGA-91-6835	7	8	7	8
TCGA-50-6592	7	7	7	7
TCGA-44-8120	7	6	7	6
TCGA-91-6829	7	6	7	6
TCGA-44-A479	7	7	7	8
TCGA-73-4658	7	7	7	7
TCGA-91-6828	7	7	7	7
TCGA-44-A47B	7	6	7	6
TCGA-05-4384	7	6	7	5
TCGA-4B-A93V	7	7	6	7
TCGA-05-4405	7	6	7	6
TCGA-75-6206	7	6	7	6
TCGA-55-7815	7	6	6	6
TCGA-55-1594	7	6	7	6
TCGA-44-3918	7	8	7	8
TCGA-05-5715	7	6	7	5
TCGA-50-6593	7	7	7	6
TCGA-97-7937	7	5	6	5
TCGA-78-7167	7	6	7	5
TCGA-55-8208	7	8	7	8
TCGA-05-4427	7	7	7	7
TCGA-62-A46U	7	8	8	9
TCGA-44-6148	7	6	7	6
TCGA-49-AARO	7	7	7	7
TCGA-55-6971	7	7	7	7
TCGA-NJ-A4YQ	7	7	7	7
TCGA-55-7816	7	7	7	7
TCGA-44-6778	7	8	8	8
TCGA-05-4424	7	6	7	6
TCGA-55-8514	7	6	7	6
TCGA-55-8091	7	7	7	7
TCGA-55-A494	7	6	6	5
TCGA-55-8507	7	6	7	5
TCGA-MP-A4TE	7	6	7	5
TCGA-55-7907	7	7	7	7
TCGA-55-8207	7	6	7	6
TCGA-49-4512	7	6	7	5
TCGA-55-8206	7	6	7	6
TCGA-05-4417	7	7	7	7
TCGA-55-A491	7	7	7	7
TCGA-62-A470	7	5	6	5
TCGA-75-5125	6	8	6	8
TCGA-05-4398	6	7	6	7
TCGA-86-7711	6	6	6	5
TCGA-78-7536	6	6	6	5
TCGA-91-6831	6	6	6	6
TCGA-69-7978	6	8	6	8
TCGA-44-8117	6	6	6	5
TCGA-50-5933	6	7	6	7
TCGA-44-7667	6	5	6	5
TCGA-86-7953	6	6	6	5
TCGA-62-8399	6	6	6	5
TCGA-05-4390	6	5	6	5
TCGA-55-A490	6	5	6	5
TCGA-05-4415	6	6	6	5
TCGA-64-5775	6	7	6	6
TCGA-55-A493	6	7	6	7
TCGA-86-7713	6	5	6	4
TCGA-49-6743	6	6	6	6
TCGA-44-7660	6	6	6	5
TCGA-78-7146	6	6	6	6
TCGA-05-5428	6	5	6	5
TCGA-44-8119	6	6	6	6
TCGA-55-7995	6	7	6	7
TCGA-78-7155	6	5	5	4
TCGA-78-7159	6	5	7	5
TCGA-55-8087	6	5	6	4
TCGA-55-7910	6	5	6	4
TCGA-55-6543	6	6	6	5
TCGA-44-2662	5	5	5	5
