# Supplementary material for: Identification of fatty acid-related subtypes, the establishment of a prognostic signature, and immune infiltration characteristics in lung adenocarcinoma
Source: Aging (Albany NY). 2023 May 16;15(10):4202–35. doi: 10.18632/aging.204725 (PMC10258028; doi:10.18632/aging.204725)
Supplement: Supplementary Table 22 [file aging-15-204725-s021.xlsx]

## Sheet: Sheet1
Supplementary Table 22. TIDE score for all LUAD patients.
ID	No benefits	Responder	TIDE
TCGA-50-6591	FALSE	FALSE	4.96
GSM773651	FALSE	FALSE	4.58
GSM1855108	FALSE	FALSE	4.49
GSM773683	FALSE	FALSE	4.41
GSM1855150	FALSE	FALSE	4.31
GSM773592	FALSE	FALSE	4.31
GSM1672305	FALSE	FALSE	4.27
GSM1855204	FALSE	FALSE	4.19
TCGA-50-5931	FALSE	FALSE	4.1
TCGA-64-5775	FALSE	FALSE	4.06
GSM1672577	FALSE	FALSE	4.06
GSM1854964	FALSE	FALSE	4.06
GSM1855083	FALSE	FALSE	4.05
TCGA-55-7726	FALSE	FALSE	4.04
GSM773558	FALSE	FALSE	4.02
GSM773628	FALSE	FALSE	4.01
GSM1854830	FALSE	FALSE	3.89
GSM773697	FALSE	FALSE	3.84
GSM1855125	FALSE	FALSE	3.76
GSM1854963	FALSE	FALSE	3.75
TCGA-J2-A4AD	FALSE	FALSE	3.68
GSM773645	FALSE	FALSE	3.68
GSM1672555	FALSE	FALSE	3.65
TCGA-64-1679	FALSE	FALSE	3.63
TCGA-91-6847	FALSE	FALSE	3.63
GSM773658	FALSE	FALSE	3.57
TCGA-MP-A4T8	FALSE	FALSE	3.54
TCGA-55-8505	FALSE	FALSE	3.54
GSM773546	FALSE	FALSE	3.54
GSM773678	FALSE	FALSE	3.54
TCGA-97-8547	FALSE	FALSE	3.54
TCGA-86-8054	FALSE	FALSE	3.54
TCGA-MN-A4N1	FALSE	FALSE	3.5
GSM1672362	FALSE	FALSE	3.49
TCGA-38-4630	FALSE	FALSE	3.49
GSM773550	FALSE	FALSE	3.49
GSM773568	FALSE	FALSE	3.47
GSM773548	FALSE	FALSE	3.42
TCGA-MP-A4SY	FALSE	FALSE	3.4
TCGA-86-8075	FALSE	FALSE	3.4
GSM1672518	FALSE	FALSE	3.38
GSM1854823	FALSE	FALSE	3.38
TCGA-69-7979	FALSE	FALSE	3.38
GSM773571	FALSE	FALSE	3.38
GSM773659	FALSE	FALSE	3.38
GSM773741	FALSE	FALSE	3.37
GSM1672346	FALSE	FALSE	3.36
TCGA-44-2665	FALSE	FALSE	3.35
TCGA-69-7760	FALSE	FALSE	3.35
TCGA-62-A46V	FALSE	FALSE	3.34
GSM1672550	FALSE	FALSE	3.32
TCGA-64-5774	FALSE	FALSE	3.31
GSM773573	FALSE	FALSE	3.31
TCGA-49-4490	FALSE	FALSE	3.29
GSM1855116	FALSE	FALSE	3.28
GSM1855101	FALSE	FALSE	3.28
GSM773639	FALSE	FALSE	3.28
TCGA-38-6178	FALSE	FALSE	3.27
TCGA-50-5072	FALSE	FALSE	3.26
TCGA-86-6562	FALSE	FALSE	3.22
TCGA-64-5815	FALSE	FALSE	3.22
GSM1855073	FALSE	FALSE	3.21
GSM1855103	FALSE	FALSE	3.21
GSM1855033	FALSE	FALSE	3.2
TCGA-44-7667	FALSE	FALSE	3.19
GSM1855157	FALSE	FALSE	3.19
GSM1854967	FALSE	FALSE	3.19
TCGA-64-1678	FALSE	FALSE	3.17
TCGA-44-7671	FALSE	FALSE	3.17
GSM1855235	FALSE	FALSE	3.16
GSM1672512	FALSE	FALSE	3.16
TCGA-55-6981	FALSE	FALSE	3.15
TCGA-75-6214	FALSE	FALSE	3.15
TCGA-05-4390	FALSE	FALSE	3.14
GSM1672452	FALSE	FALSE	3.14
GSM1855094	FALSE	FALSE	3.12
GSM1672515	FALSE	FALSE	3.12
GSM1855199	FALSE	FALSE	3.12
GSM1672584	FALSE	FALSE	3.1
TCGA-73-4670	FALSE	FALSE	3.09
GSM773544	FALSE	FALSE	3.09
TCGA-J2-8192	FALSE	FALSE	3.07
GSM1672716	FALSE	FALSE	3.07
GSM1855196	FALSE	FALSE	3.07
GSM1855023	FALSE	FALSE	3.05
TCGA-50-6594	FALSE	FALSE	3.04
GSM773640	FALSE	FALSE	3.03
TCGA-55-6982	FALSE	FALSE	3.03
GSM1855173	FALSE	FALSE	3.03
TCGA-78-8662	FALSE	FALSE	3.02
GSM1855097	FALSE	FALSE	3.02
GSM1672657	FALSE	FALSE	3.02
TCGA-73-4675	FALSE	FALSE	3.01
GSM1672486	FALSE	FALSE	3.01
GSM1672627	FALSE	FALSE	3.01
TCGA-38-4628	FALSE	FALSE	3
GSM1672503	FALSE	FALSE	3
TCGA-55-A490	FALSE	FALSE	3
GSM1672390	FALSE	FALSE	2.99
GSM773660	FALSE	FALSE	2.98
GSM1855037	FALSE	FALSE	2.98
GSM1855020	FALSE	FALSE	2.97
GSM1855226	FALSE	FALSE	2.96
TCGA-55-8615	FALSE	FALSE	2.96
GSM773673	FALSE	FALSE	2.95
GSM1855168	FALSE	FALSE	2.93
TCGA-50-5936	FALSE	FALSE	2.93
GSM1854831	FALSE	FALSE	2.93
GSM1854838	FALSE	FALSE	2.92
GSM1672368	FALSE	FALSE	2.92
GSM1854983	FALSE	FALSE	2.91
TCGA-73-4676	FALSE	FALSE	2.9
GSM1672675	FALSE	FALSE	2.88
TCGA-86-7955	FALSE	FALSE	2.88
TCGA-95-7043	FALSE	FALSE	2.88
GSM773579	FALSE	FALSE	2.88
TCGA-05-5429	FALSE	FALSE	2.87
GSM773627	FALSE	FALSE	2.87
GSM1854997	FALSE	FALSE	2.87
GSM1855202	FALSE	FALSE	2.86
GSM1672632	FALSE	FALSE	2.86
GSM1854887	FALSE	FALSE	2.85
TCGA-78-7145	FALSE	FALSE	2.84
GSM1672453	FALSE	FALSE	2.84
TCGA-95-7948	FALSE	FALSE	2.84
GSM1854886	FALSE	FALSE	2.84
GSM1672634	FALSE	FALSE	2.83
GSM773740	FALSE	FALSE	2.83
GSM773582	FALSE	FALSE	2.83
GSM1672377	FALSE	FALSE	2.82
GSM773542	FALSE	FALSE	2.82
TCGA-62-8394	FALSE	FALSE	2.82
TCGA-55-8090	FALSE	FALSE	2.82
GSM1854969	FALSE	FALSE	2.82
GSM773655	FALSE	FALSE	2.81
TCGA-73-4659	FALSE	FALSE	2.81
TCGA-05-4402	FALSE	FALSE	2.8
TCGA-86-8674	FALSE	FALSE	2.79
GSM1672683	FALSE	FALSE	2.79
GSM773742	FALSE	FALSE	2.77
GSM1855068	FALSE	FALSE	2.77
GSM773743	FALSE	FALSE	2.76
TCGA-55-6980	FALSE	FALSE	2.75
TCGA-62-A46O	FALSE	FALSE	2.74
GSM1672309	FALSE	FALSE	2.74
TCGA-97-8179	FALSE	FALSE	2.72
TCGA-49-6742	FALSE	FALSE	2.71
GSM1672342	FALSE	FALSE	2.7
GSM1855066	FALSE	FALSE	2.69
TCGA-55-A57B	FALSE	FALSE	2.69
GSM1854846	FALSE	FALSE	2.69
GSM773722	FALSE	FALSE	2.68
GSM773736	FALSE	FALSE	2.67
GSM1855193	FALSE	FALSE	2.64
TCGA-NJ-A4YF	FALSE	FALSE	2.64
TCGA-93-8067	FALSE	FALSE	2.62
GSM773675	FALSE	FALSE	2.61
GSM1672364	FALSE	FALSE	2.61
TCGA-50-5939	FALSE	FALSE	2.6
TCGA-J2-8194	FALSE	FALSE	2.59
TCGA-55-8094	FALSE	FALSE	2.58
GSM1854817	FALSE	FALSE	2.57
GSM1672468	FALSE	FALSE	2.55
GSM1855085	FALSE	FALSE	2.53
GSM773650	FALSE	FALSE	2.53
TCGA-55-7913	FALSE	FALSE	2.53
GSM1854955	FALSE	FALSE	2.51
GSM1672623	FALSE	FALSE	2.51
TCGA-95-8494	FALSE	FALSE	2.5
TCGA-05-4396	FALSE	FALSE	2.5
TCGA-97-8176	FALSE	FALSE	2.5
GSM1854906	FALSE	FALSE	2.48
GSM1854869	FALSE	FALSE	2.48
GSM773540	FALSE	FALSE	2.48
GSM1855089	FALSE	FALSE	2.47
GSM1854876	FALSE	FALSE	2.47
GSM1672610	FALSE	FALSE	2.44
TCGA-86-7713	FALSE	FALSE	2.44
TCGA-NJ-A7XG	FALSE	FALSE	2.43
GSM1854822	FALSE	FALSE	2.43
GSM1672329	FALSE	FALSE	2.43
GSM1855051	FALSE	FALSE	2.42
TCGA-55-6986	FALSE	FALSE	2.41
TCGA-50-5932	FALSE	FALSE	2.39
GSM773543	FALSE	FALSE	2.38
GSM1672566	FALSE	FALSE	2.38
GSM1672709	FALSE	FALSE	2.38
TCGA-78-7147	FALSE	FALSE	2.38
GSM1672715	FALSE	FALSE	2.37
GSM1672432	FALSE	FALSE	2.36
GSM1855079	FALSE	FALSE	2.36
GSM1672436	FALSE	FALSE	2.36
GSM1672672	FALSE	FALSE	2.35
TCGA-69-8253	FALSE	FALSE	2.35
GSM1672714	FALSE	FALSE	2.35
GSM1672696	FALSE	FALSE	2.34
TCGA-64-1680	FALSE	FALSE	2.34
GSM1672644	FALSE	FALSE	2.32
GSM1672569	FALSE	FALSE	2.32
GSM1854909	FALSE	FALSE	2.31
GSM773641	FALSE	FALSE	2.3
GSM1672499	FALSE	FALSE	2.29
TCGA-55-6984	FALSE	FALSE	2.28
GSM773541	FALSE	FALSE	2.26
TCGA-35-3615	FALSE	FALSE	2.25
GSM773718	FALSE	FALSE	2.25
GSM1672649	FALSE	FALSE	2.24
GSM1672668	FALSE	FALSE	2.23
GSM1672454	FALSE	FALSE	2.22
GSM1672422	FALSE	FALSE	2.2
TCGA-44-2662	FALSE	FALSE	2.18
TCGA-49-4486	FALSE	FALSE	2.16
GSM1672642	FALSE	FALSE	2.09
TCGA-97-8175	FALSE	FALSE	2.08
GSM1855045	FALSE	FALSE	2.08
GSM1672652	FALSE	FALSE	2.07
GSM773584	FALSE	FALSE	2.07
GSM773727	FALSE	FALSE	2.06
GSM773617	FALSE	FALSE	2.06
GSM1854849	FALSE	FALSE	2.04
GSM773702	FALSE	FALSE	2.04
TCGA-44-A47A	FALSE	FALSE	2.03
TCGA-93-A4JP	FALSE	FALSE	2.02
GSM773587	FALSE	FALSE	1.96
GSM1672545	FALSE	FALSE	1.95
TCGA-67-6215	FALSE	FALSE	1.88
GSM1854883	FALSE	FALSE	1.87
GSM1854953	FALSE	FALSE	1.65
GSM773715	FALSE	FALSE	1.63
GSM1855144	FALSE	FALSE	1.63
GSM1855122	FALSE	FALSE	1.52
GSM1672356	FALSE	FALSE	1.41
GSM1672580	FALSE	TRUE	-0.46
GSM1672583	FALSE	TRUE	-0.53
GSM1672607	FALSE	TRUE	-0.6
GSM1672582	FALSE	TRUE	-0.66
GSM1672529	FALSE	TRUE	-0.75
GSM1672534	FALSE	TRUE	-0.77
TCGA-50-8459	FALSE	TRUE	-0.93
GSM1672590	FALSE	TRUE	-0.95
GSM1854820	FALSE	TRUE	-0.99
TCGA-MP-A4TI	FALSE	TRUE	-1.08
GSM1672551	FALSE	TRUE	-1.09
GSM1672537	FALSE	TRUE	-1.12
GSM1672449	FALSE	TRUE	-1.14
GSM1672591	FALSE	TRUE	-1.17
GSM1855024	FALSE	TRUE	-1.17
GSM1854877	FALSE	TRUE	-1.19
GSM1672578	FALSE	TRUE	-1.19
GSM1672558	FALSE	TRUE	-1.2
TCGA-49-AAR4	FALSE	TRUE	-1.24
TCGA-44-7672	FALSE	TRUE	-1.29
GSM1672554	FALSE	TRUE	-1.29
GSM1672311	FALSE	TRUE	-1.3
GSM1854928	FALSE	TRUE	-1.32
GSM1855026	FALSE	TRUE	-1.32
TCGA-L9-A743	FALSE	TRUE	-1.33
GSM1854908	FALSE	TRUE	-1.34
GSM1672367	FALSE	TRUE	-1.35
TCGA-49-AAR3	FALSE	TRUE	-1.35
TCGA-55-8089	FALSE	TRUE	-1.36
TCGA-MP-A4T4	FALSE	TRUE	-1.37
GSM1672442	FALSE	TRUE	-1.38
TCGA-55-7574	FALSE	TRUE	-1.38
GSM773679	FALSE	TRUE	-1.38
GSM1672543	FALSE	TRUE	-1.38
GSM1855184	FALSE	TRUE	-1.39
GSM773723	FALSE	TRUE	-1.4
GSM1854927	FALSE	TRUE	-1.4
GSM1672479	FALSE	TRUE	-1.41
TCGA-93-A4JQ	FALSE	TRUE	-1.43
GSM1855190	FALSE	TRUE	-1.43
GSM773677	FALSE	TRUE	-1.43
GSM1854910	FALSE	TRUE	-1.45
TCGA-69-7978	FALSE	TRUE	-1.46
GSM1854865	FALSE	TRUE	-1.47
TCGA-93-A4JO	FALSE	TRUE	-1.47
GSM1855121	FALSE	TRUE	-1.49
TCGA-55-8299	FALSE	TRUE	-1.49
GSM773583	FALSE	TRUE	-1.5
GSM1854954	FALSE	TRUE	-1.52
TCGA-50-5045	FALSE	TRUE	-1.52
GSM773605	FALSE	TRUE	-1.52
TCGA-55-6979	FALSE	TRUE	-1.53
GSM773580	FALSE	TRUE	-1.53
GSM1855123	FALSE	TRUE	-1.53
GSM773674	FALSE	TRUE	-1.54
GSM773694	FALSE	TRUE	-1.54
GSM773590	FALSE	TRUE	-1.54
TCGA-50-5941	FALSE	TRUE	-1.55
GSM1672413	FALSE	TRUE	-1.55
TCGA-95-7944	FALSE	TRUE	-1.55
TCGA-55-A48X	FALSE	TRUE	-1.55
GSM773576	FALSE	TRUE	-1.56
GSM1855176	FALSE	TRUE	-1.56
GSM1672483	FALSE	TRUE	-1.57
GSM1855132	FALSE	TRUE	-1.58
GSM1855022	FALSE	TRUE	-1.58
GSM773588	FALSE	TRUE	-1.59
GSM1672410	FALSE	TRUE	-1.6
GSM773665	FALSE	TRUE	-1.61
TCGA-55-A493	FALSE	TRUE	-1.61
GSM1672412	FALSE	TRUE	-1.62
TCGA-49-6744	FALSE	TRUE	-1.62
GSM1672419	FALSE	TRUE	-1.62
TCGA-55-6712	FALSE	TRUE	-1.63
TCGA-78-8660	FALSE	TRUE	-1.63
GSM1672581	FALSE	TRUE	-1.64
GSM1854904	FALSE	TRUE	-1.64
GSM1855018	FALSE	TRUE	-1.64
GSM1854913	FALSE	TRUE	-1.64
TCGA-MP-A4TK	FALSE	TRUE	-1.64
TCGA-55-6985	FALSE	TRUE	-1.65
TCGA-44-6779	FALSE	TRUE	-1.65
GSM773604	FALSE	TRUE	-1.65
GSM1854890	FALSE	TRUE	-1.65
GSM1672404	FALSE	TRUE	-1.65
GSM1855021	FALSE	TRUE	-1.65
TCGA-55-8205	FALSE	TRUE	-1.66
TCGA-97-8174	FALSE	TRUE	-1.66
TCGA-44-3396	FALSE	TRUE	-1.66
TCGA-05-4434	FALSE	TRUE	-1.67
GSM1672467	FALSE	TRUE	-1.67
GSM773756	FALSE	TRUE	-1.68
GSM773566	FALSE	TRUE	-1.68
GSM1854980	FALSE	TRUE	-1.69
GSM1855039	FALSE	TRUE	-1.69
GSM773572	FALSE	TRUE	-1.69
TCGA-55-6978	FALSE	TRUE	-1.69
GSM1672426	FALSE	TRUE	-1.7
GSM1855032	FALSE	TRUE	-1.7
TCGA-38-4627	FALSE	TRUE	-1.7
GSM1854818	FALSE	TRUE	-1.7
GSM773646	FALSE	TRUE	-1.7
GSM773570	FALSE	TRUE	-1.71
GSM1854944	FALSE	TRUE	-1.71
GSM1672334	FALSE	TRUE	-1.71
GSM773560	FALSE	TRUE	-1.71
GSM1855014	FALSE	TRUE	-1.71
TCGA-44-6145	FALSE	TRUE	-1.72
GSM1854799	FALSE	TRUE	-1.72
TCGA-L9-A8F4	FALSE	TRUE	-1.72
TCGA-MP-A4T9	FALSE	TRUE	-1.72
GSM1672417	FALSE	TRUE	-1.72
GSM773661	FALSE	TRUE	-1.72
GSM1672599	FALSE	TRUE	-1.72
GSM1672314	FALSE	TRUE	-1.73
TCGA-69-7974	FALSE	TRUE	-1.73
GSM1855140	FALSE	TRUE	-1.73
TCGA-55-8511	FALSE	TRUE	-1.74
TCGA-55-8302	FALSE	TRUE	-1.74
TCGA-50-5044	FALSE	TRUE	-1.74
GSM1855161	FALSE	TRUE	-1.74
GSM1672698	FALSE	TRUE	-1.74
TCGA-05-4425	FALSE	TRUE	-1.74
GSM773700	FALSE	TRUE	-1.75
GSM1855107	FALSE	TRUE	-1.75
GSM1854856	FALSE	TRUE	-1.75
GSM773656	FALSE	TRUE	-1.75
GSM1854986	FALSE	TRUE	-1.75
TCGA-44-A4SS	FALSE	TRUE	-1.75
GSM1672665	FALSE	TRUE	-1.76
GSM773647	FALSE	TRUE	-1.76
TCGA-44-7661	FALSE	TRUE	-1.76
GSM773577	FALSE	TRUE	-1.77
GSM1672391	FALSE	TRUE	-1.77
GSM1855166	FALSE	TRUE	-1.77
TCGA-50-6590	FALSE	TRUE	-1.77
GSM773559	FALSE	TRUE	-1.78
GSM1855147	FALSE	TRUE	-1.78
GSM1855006	FALSE	TRUE	-1.78
TCGA-95-A4VN	FALSE	TRUE	-1.79
TCGA-69-7980	FALSE	TRUE	-1.79
GSM1854859	FALSE	TRUE	-1.79
GSM1855185	FALSE	TRUE	-1.79
GSM1855027	FALSE	TRUE	-1.8
TCGA-78-8655	FALSE	TRUE	-1.81
TCGA-83-5908	FALSE	TRUE	-1.81
TCGA-67-3774	FALSE	TRUE	-1.81
TCGA-49-AARN	FALSE	TRUE	-1.81
TCGA-55-8508	FALSE	TRUE	-1.82
GSM773565	FALSE	TRUE	-1.82
GSM1855156	FALSE	TRUE	-1.82
GSM773649	FALSE	TRUE	-1.82
TCGA-86-8585	FALSE	TRUE	-1.83
GSM1854915	FALSE	TRUE	-1.83
GSM773669	FALSE	TRUE	-1.84
GSM773724	FALSE	TRUE	-1.84
GSM1672589	FALSE	TRUE	-1.85
TCGA-55-7994	FALSE	TRUE	-1.85
GSM1854893	FALSE	TRUE	-1.85
GSM1672323	FALSE	TRUE	-1.86
GSM1854815	FALSE	TRUE	-1.86
GSM1855232	FALSE	TRUE	-1.86
GSM1855120	FALSE	TRUE	-1.86
TCGA-MP-A4TC	FALSE	TRUE	-1.86
GSM1672355	FALSE	TRUE	-1.87
GSM1854881	FALSE	TRUE	-1.87
GSM1672659	FALSE	TRUE	-1.87
GSM773717	FALSE	TRUE	-1.87
GSM773589	FALSE	TRUE	-1.87
GSM773676	FALSE	TRUE	-1.87
GSM1672383	FALSE	TRUE	-1.88
GSM773621	FALSE	TRUE	-1.88
TCGA-50-6595	FALSE	TRUE	-1.88
GSM1672450	FALSE	TRUE	-1.89
GSM1672401	FALSE	TRUE	-1.89
GSM1672350	FALSE	TRUE	-1.89
GSM1854971	FALSE	TRUE	-1.89
GSM1854895	FALSE	TRUE	-1.89
GSM1672304	FALSE	TRUE	-1.89
GSM773551	FALSE	TRUE	-1.89
GSM1854984	FALSE	TRUE	-1.9
GSM773643	FALSE	TRUE	-1.9
GSM1672540	FALSE	TRUE	-1.9
GSM1855019	FALSE	TRUE	-1.9
TCGA-69-7763	FALSE	TRUE	-1.9
GSM773585	FALSE	TRUE	-1.9
GSM1672602	FALSE	TRUE	-1.9
GSM773555	FALSE	TRUE	-1.91
TCGA-38-4629	FALSE	TRUE	-1.91
GSM1854903	FALSE	TRUE	-1.91
GSM1672544	FALSE	TRUE	-1.91
GSM773545	FALSE	TRUE	-1.91
GSM1672414	FALSE	TRUE	-1.91
GSM773644	FALSE	TRUE	-1.91
GSM773725	FALSE	TRUE	-1.91
GSM773574	FALSE	TRUE	-1.91
GSM1855049	FALSE	TRUE	-1.92
GSM1855146	FALSE	TRUE	-1.92
TCGA-49-6745	FALSE	TRUE	-1.92
TCGA-MN-A4N5	FALSE	TRUE	-1.92
GSM1855064	FALSE	TRUE	-1.92
GSM1855062	FALSE	TRUE	-1.93
GSM1854810	FALSE	TRUE	-1.93
TCGA-95-A4VK	FALSE	TRUE	-1.93
GSM1672701	FALSE	TRUE	-1.93
GSM1672397	FALSE	TRUE	-1.93
GSM1672699	FALSE	TRUE	-1.93
TCGA-86-8278	FALSE	TRUE	-1.93
GSM1855175	FALSE	TRUE	-1.93
GSM1855230	FALSE	TRUE	-1.93
GSM1854885	FALSE	TRUE	-1.94
TCGA-86-8672	FALSE	TRUE	-1.94
TCGA-44-7662	FALSE	TRUE	-1.94
TCGA-49-4507	FALSE	TRUE	-1.94
GSM773749	FALSE	TRUE	-1.95
GSM773754	FALSE	TRUE	-1.96
GSM1672549	FALSE	TRUE	-1.96
TCGA-50-5930	FALSE	TRUE	-1.96
GSM1672493	FALSE	TRUE	-1.97
GSM1855142	FALSE	TRUE	-1.97
GSM773610	FALSE	TRUE	-1.98
GSM1672438	FALSE	TRUE	-1.98
GSM1672402	FALSE	TRUE	-1.99
TCGA-35-4123	FALSE	TRUE	-1.99
GSM1672378	FALSE	TRUE	-1.99
GSM1672669	FALSE	TRUE	-1.99
GSM773613	FALSE	TRUE	-1.99
TCGA-86-8359	FALSE	TRUE	-1.99
GSM1672510	FALSE	TRUE	-1.99
TCGA-73-4666	FALSE	TRUE	-1.99
GSM1672434	FALSE	TRUE	-2
TCGA-55-8614	FALSE	TRUE	-2
TCGA-55-8092	FALSE	TRUE	-2
GSM1672338	FALSE	TRUE	-2
GSM773692	FALSE	TRUE	-2.01
GSM1672376	FALSE	TRUE	-2.01
TCGA-86-7701	FALSE	TRUE	-2.01
GSM1855114	FALSE	TRUE	-2.01
GSM773672	FALSE	TRUE	-2.01
GSM1672647	FALSE	TRUE	-2.01
GSM773599	FALSE	TRUE	-2.01
TCGA-MN-A4N4	FALSE	TRUE	-2.01
GSM1672437	FALSE	TRUE	-2.01
GSM1854899	FALSE	TRUE	-2.01
GSM1855180	FALSE	TRUE	-2.02
TCGA-55-7911	FALSE	TRUE	-2.02
TCGA-05-4398	FALSE	TRUE	-2.02
GSM1672455	FALSE	TRUE	-2.02
TCGA-49-AAQV	FALSE	TRUE	-2.02
GSM1855042	FALSE	TRUE	-2.02
GSM1855145	FALSE	TRUE	-2.02
GSM1854868	FALSE	TRUE	-2.02
TCGA-55-8203	FALSE	TRUE	-2.03
GSM1854855	FALSE	TRUE	-2.03
GSM773591	FALSE	TRUE	-2.03
GSM773720	FALSE	TRUE	-2.04
TCGA-49-AARE	FALSE	TRUE	-2.04
GSM1855050	FALSE	TRUE	-2.04
GSM1854880	FALSE	TRUE	-2.04
TCGA-91-6830	FALSE	TRUE	-2.04
GSM1854998	FALSE	TRUE	-2.04
GSM1854829	FALSE	TRUE	-2.04
GSM773600	FALSE	TRUE	-2.04
GSM1672473	FALSE	TRUE	-2.04
GSM1672500	FALSE	TRUE	-2.05
GSM1672332	FALSE	TRUE	-2.05
TCGA-62-A46Y	FALSE	TRUE	-2.05
GSM1672546	FALSE	TRUE	-2.05
TCGA-MP-A4T7	FALSE	TRUE	-2.05
GSM1855109	FALSE	TRUE	-2.05
TCGA-91-6848	FALSE	TRUE	-2.05
GSM1855224	FALSE	TRUE	-2.05
GSM773626	FALSE	TRUE	-2.05
GSM1672694	FALSE	TRUE	-2.05
TCGA-75-5125	FALSE	TRUE	-2.05
GSM1672348	FALSE	TRUE	-2.06
TCGA-64-5781	FALSE	TRUE	-2.06
GSM1854945	FALSE	TRUE	-2.06
TCGA-05-4250	FALSE	TRUE	-2.06
GSM1672702	FALSE	TRUE	-2.06
GSM1854825	FALSE	TRUE	-2.06
GSM1672573	FALSE	TRUE	-2.07
GSM773764	FALSE	TRUE	-2.07
TCGA-69-A59K	FALSE	TRUE	-2.07
TCGA-78-7160	FALSE	TRUE	-2.07
GSM773562	FALSE	TRUE	-2.07
GSM1672345	FALSE	TRUE	-2.07
TCGA-05-4418	FALSE	TRUE	-2.07
TCGA-49-6761	FALSE	TRUE	-2.07
GSM773666	FALSE	TRUE	-2.07
TCGA-05-5425	FALSE	TRUE	-2.08
GSM1672324	FALSE	TRUE	-2.09
TCGA-55-8204	FALSE	TRUE	-2.09
TCGA-86-8055	FALSE	TRUE	-2.09
GSM773597	FALSE	TRUE	-2.09
GSM773745	FALSE	TRUE	-2.09
GSM1855016	FALSE	TRUE	-2.1
TCGA-55-6968	FALSE	TRUE	-2.1
GSM1672416	FALSE	TRUE	-2.1
GSM1855234	FALSE	TRUE	-2.11
GSM1672392	FALSE	TRUE	-2.12
GSM1672494	FALSE	TRUE	-2.12
GSM1854891	FALSE	TRUE	-2.12
GSM1672411	FALSE	TRUE	-2.12
GSM1672625	FALSE	TRUE	-2.12
TCGA-35-4122	FALSE	TRUE	-2.12
GSM1672388	FALSE	TRUE	-2.12
GSM773552	FALSE	TRUE	-2.12
TCGA-44-2668	FALSE	TRUE	-2.13
GSM773598	FALSE	TRUE	-2.13
TCGA-86-8673	FALSE	TRUE	-2.13
TCGA-67-3771	FALSE	TRUE	-2.13
GSM1855047	FALSE	TRUE	-2.14
GSM1854932	FALSE	TRUE	-2.14
GSM1672308	FALSE	TRUE	-2.14
TCGA-62-8398	FALSE	TRUE	-2.14
GSM1672646	FALSE	TRUE	-2.14
GSM1672399	FALSE	TRUE	-2.14
TCGA-80-5608	FALSE	TRUE	-2.14
TCGA-86-7953	FALSE	TRUE	-2.15
GSM1672341	FALSE	TRUE	-2.15
GSM1672418	FALSE	TRUE	-2.15
GSM1855211	FALSE	TRUE	-2.16
GSM1672306	FALSE	TRUE	-2.16
GSM1854889	FALSE	TRUE	-2.16
TCGA-44-3398	FALSE	TRUE	-2.16
GSM1854995	FALSE	TRUE	-2.17
GSM773575	FALSE	TRUE	-2.17
TCGA-MP-A4SV	FALSE	TRUE	-2.17
GSM1672663	FALSE	TRUE	-2.17
TCGA-95-7039	FALSE	TRUE	-2.17
TCGA-95-7567	FALSE	TRUE	-2.17
GSM1672393	FALSE	TRUE	-2.17
GSM773563	FALSE	TRUE	-2.18
GSM773703	FALSE	TRUE	-2.18
GSM1672475	FALSE	TRUE	-2.19
GSM1672435	FALSE	TRUE	-2.19
GSM1854992	FALSE	TRUE	-2.19
GSM1855189	FALSE	TRUE	-2.19
TCGA-55-5899	FALSE	TRUE	-2.19
GSM773547	FALSE	TRUE	-2.2
GSM1672317	FALSE	TRUE	-2.2
GSM1854921	FALSE	TRUE	-2.21
GSM1672719	FALSE	TRUE	-2.21
GSM1672621	FALSE	TRUE	-2.21
GSM1672693	FALSE	TRUE	-2.22
GSM1672707	FALSE	TRUE	-2.22
TCGA-99-8033	FALSE	TRUE	-2.22
GSM1672611	FALSE	TRUE	-2.22
GSM1854965	FALSE	TRUE	-2.23
GSM1855029	FALSE	TRUE	-2.23
GSM1672385	FALSE	TRUE	-2.23
GSM1855065	FALSE	TRUE	-2.23
GSM1672395	FALSE	TRUE	-2.23
TCGA-50-5933	FALSE	TRUE	-2.24
GSM1672585	FALSE	TRUE	-2.24
TCGA-62-8399	FALSE	TRUE	-2.24
GSM1672713	FALSE	TRUE	-2.24
GSM1672689	FALSE	TRUE	-2.24
GSM1672331	FALSE	TRUE	-2.24
TCGA-NJ-A4YP	FALSE	TRUE	-2.24
GSM1854873	FALSE	TRUE	-2.25
GSM773557	FALSE	TRUE	-2.25
TCGA-86-A4JF	FALSE	TRUE	-2.25
TCGA-49-6767	FALSE	TRUE	-2.26
GSM1672380	FALSE	TRUE	-2.26
GSM1672671	FALSE	TRUE	-2.27
TCGA-MP-A4TA	FALSE	TRUE	-2.27
GSM1672463	FALSE	TRUE	-2.27
GSM1855012	FALSE	TRUE	-2.28
GSM773593	FALSE	TRUE	-2.28
GSM1672456	FALSE	TRUE	-2.29
GSM1672620	FALSE	TRUE	-2.29
GSM773586	FALSE	TRUE	-2.3
GSM1672680	FALSE	TRUE	-2.3
GSM1854882	FALSE	TRUE	-2.3
GSM1672708	FALSE	TRUE	-2.3
GSM1854947	FALSE	TRUE	-2.3
GSM1672722	FALSE	TRUE	-2.3
TCGA-49-4494	FALSE	TRUE	-2.3
GSM1672447	FALSE	TRUE	-2.3
GSM1854948	FALSE	TRUE	-2.3
GSM1855137	FALSE	TRUE	-2.31
TCGA-78-7542	FALSE	TRUE	-2.31
GSM1855228	FALSE	TRUE	-2.32
TCGA-55-1595	FALSE	TRUE	-2.32
GSM1672721	FALSE	TRUE	-2.32
GSM773636	FALSE	TRUE	-2.32
GSM773716	FALSE	TRUE	-2.33
GSM1854802	FALSE	TRUE	-2.33
GSM773633	FALSE	TRUE	-2.33
GSM1854892	FALSE	TRUE	-2.33
GSM1672340	FALSE	TRUE	-2.33
GSM1672299	FALSE	TRUE	-2.33
GSM1854827	FALSE	TRUE	-2.34
GSM1855136	FALSE	TRUE	-2.34
GSM1855000	FALSE	TRUE	-2.34
GSM1672302	FALSE	TRUE	-2.34
GSM1855179	FALSE	TRUE	-2.34
GSM1854942	FALSE	TRUE	-2.35
TCGA-55-6975	FALSE	TRUE	-2.35
GSM1855084	FALSE	TRUE	-2.35
GSM1854916	FALSE	TRUE	-2.35
TCGA-78-7148	FALSE	TRUE	-2.36
TCGA-55-7724	FALSE	TRUE	-2.36
GSM1855078	FALSE	TRUE	-2.36
TCGA-38-4632	FALSE	TRUE	-2.37
GSM773729	FALSE	TRUE	-2.37
GSM1854853	FALSE	TRUE	-2.38
GSM773581	FALSE	TRUE	-2.38
GSM1672638	FALSE	TRUE	-2.38
TCGA-L9-A5IP	FALSE	TRUE	-2.38
GSM1672310	FALSE	TRUE	-2.38
TCGA-62-A472	FALSE	TRUE	-2.39
TCGA-49-6743	FALSE	TRUE	-2.4
GSM1855038	FALSE	TRUE	-2.4
GSM1855171	FALSE	TRUE	-2.4
GSM1672692	FALSE	TRUE	-2.4
TCGA-73-4677	FALSE	TRUE	-2.4
TCGA-55-7903	FALSE	TRUE	-2.4
GSM1855203	FALSE	TRUE	-2.41
TCGA-44-8117	FALSE	TRUE	-2.41
GSM1672682	FALSE	TRUE	-2.42
GSM1672444	FALSE	TRUE	-2.42
TCGA-44-7669	FALSE	TRUE	-2.42
GSM1672433	FALSE	TRUE	-2.42
TCGA-86-8074	FALSE	TRUE	-2.42
GSM1854805	FALSE	TRUE	-2.43
GSM1855135	FALSE	TRUE	-2.43
TCGA-78-7166	FALSE	TRUE	-2.43
TCGA-49-4506	FALSE	TRUE	-2.43
GSM1672336	FALSE	TRUE	-2.43
GSM1672370	FALSE	TRUE	-2.44
GSM1672440	FALSE	TRUE	-2.44
GSM773730	FALSE	TRUE	-2.44
TCGA-73-7499	FALSE	TRUE	-2.44
TCGA-44-5643	FALSE	TRUE	-2.45
GSM1855138	FALSE	TRUE	-2.45
TCGA-95-7947	FALSE	TRUE	-2.45
GSM1855060	FALSE	TRUE	-2.45
GSM1672318	FALSE	TRUE	-2.46
TCGA-L4-A4E5	FALSE	TRUE	-2.46
GSM1855231	FALSE	TRUE	-2.46
TCGA-55-6970	FALSE	TRUE	-2.46
GSM1672439	FALSE	TRUE	-2.46
GSM1854866	FALSE	TRUE	-2.46
GSM1672502	FALSE	TRUE	-2.47
GSM1855028	FALSE	TRUE	-2.47
GSM773630	FALSE	TRUE	-2.47
GSM1672492	FALSE	TRUE	-2.48
GSM1855001	FALSE	TRUE	-2.48
TCGA-86-8358	FALSE	TRUE	-2.48
GSM1854975	FALSE	TRUE	-2.48
GSM773751	FALSE	TRUE	-2.48
TCGA-69-7973	FALSE	TRUE	-2.49
GSM1855206	FALSE	TRUE	-2.49
GSM1672297	FALSE	TRUE	-2.49
TCGA-91-6831	FALSE	TRUE	-2.5
GSM1672457	FALSE	TRUE	-2.5
GSM1672353	FALSE	TRUE	-2.5
TCGA-75-5147	FALSE	TRUE	-2.51
GSM1672723	FALSE	TRUE	-2.52
GSM773616	FALSE	TRUE	-2.52
GSM1855096	FALSE	TRUE	-2.52
GSM1672375	FALSE	TRUE	-2.52
GSM773578	FALSE	TRUE	-2.53
GSM773601	FALSE	TRUE	-2.53
GSM1672487	FALSE	TRUE	-2.53
GSM1672630	FALSE	TRUE	-2.53
GSM1672313	FALSE	TRUE	-2.54
GSM1672421	FALSE	TRUE	-2.54
TCGA-50-5946	FALSE	TRUE	-2.54
TCGA-80-5611	FALSE	TRUE	-2.54
GSM1855043	FALSE	TRUE	-2.55
GSM773603	FALSE	TRUE	-2.55
GSM1855237	FALSE	TRUE	-2.57
TCGA-50-5066	FALSE	TRUE	-2.57
GSM1672658	FALSE	TRUE	-2.57
GSM773556	FALSE	TRUE	-2.58
TCGA-55-A48Y	FALSE	TRUE	-2.58
TCGA-44-7670	FALSE	TRUE	-2.58
GSM1672666	FALSE	TRUE	-2.58
GSM1855225	FALSE	TRUE	-2.59
GSM1672633	FALSE	TRUE	-2.59
TCGA-38-4625	FALSE	TRUE	-2.6
GSM1855181	FALSE	TRUE	-2.6
GSM1855128	FALSE	TRUE	-2.61
TCGA-86-7711	FALSE	TRUE	-2.61
GSM1672408	FALSE	TRUE	-2.61
TCGA-44-5644	FALSE	TRUE	-2.61
GSM1672477	FALSE	TRUE	-2.61
GSM1854841	FALSE	TRUE	-2.61
GSM1672697	FALSE	TRUE	-2.62
GSM1672718	FALSE	TRUE	-2.62
GSM1855178	FALSE	TRUE	-2.63
GSM1672667	FALSE	TRUE	-2.63
GSM1855009	FALSE	TRUE	-2.64
TCGA-MP-A4TF	FALSE	TRUE	-2.64
GSM1672614	FALSE	TRUE	-2.64
TCGA-53-7624	FALSE	TRUE	-2.65
GSM1672706	FALSE	TRUE	-2.66
GSM1855095	FALSE	TRUE	-2.66
GSM1672717	FALSE	TRUE	-2.67
GSM1672635	FALSE	TRUE	-2.67
TCGA-44-7660	FALSE	TRUE	-2.68
TCGA-62-A471	FALSE	TRUE	-2.69
GSM1672678	FALSE	TRUE	-2.7
GSM1672720	FALSE	TRUE	-2.7
TCGA-49-AAR9	FALSE	TRUE	-2.71
TCGA-75-7027	FALSE	TRUE	-2.71
GSM1855238	FALSE	TRUE	-2.72
TCGA-55-1596	FALSE	TRUE	-2.72
GSM1854956	FALSE	TRUE	-2.73
GSM1855153	FALSE	TRUE	-2.73
TCGA-95-7562	FALSE	TRUE	-2.75
GSM1672315	FALSE	TRUE	-2.76
GSM1672648	FALSE	TRUE	-2.76
TCGA-05-4420	FALSE	TRUE	-2.77
GSM1672307	FALSE	TRUE	-2.77
GSM1855118	FALSE	TRUE	-2.78
GSM1672660	FALSE	TRUE	-2.79
GSM1855117	FALSE	TRUE	-2.79
GSM1672303	FALSE	TRUE	-2.79
GSM1854941	FALSE	TRUE	-2.81
TCGA-78-7154	FALSE	TRUE	-2.81
TCGA-38-4631	FALSE	TRUE	-2.81
GSM1672684	FALSE	TRUE	-2.84
GSM1855207	FALSE	TRUE	-2.84
GSM1672608	FALSE	TRUE	-2.84
GSM1854961	FALSE	TRUE	-2.85
GSM1854938	FALSE	TRUE	-2.85
GSM1855160	FALSE	TRUE	-2.86
TCGA-05-4397	FALSE	TRUE	-2.86
GSM1672679	FALSE	TRUE	-2.87
TCGA-64-1677	FALSE	TRUE	-2.87
GSM1672296	FALSE	TRUE	-2.89
TCGA-44-4112	FALSE	TRUE	-2.9
GSM1854981	FALSE	TRUE	-2.91
GSM1855198	FALSE	TRUE	-2.92
TCGA-73-A9RS	FALSE	TRUE	-2.92
GSM1672688	FALSE	TRUE	-2.92
GSM1855131	FALSE	TRUE	-2.93
GSM1854861	FALSE	TRUE	-2.94
TCGA-78-7150	FALSE	TRUE	-2.94
TCGA-91-6836	FALSE	TRUE	-2.95
TCGA-78-7146	FALSE	TRUE	-2.98
TCGA-05-4415	FALSE	TRUE	-2.99
GSM1854933	FALSE	TRUE	-3
TCGA-78-7536	FALSE	TRUE	-3.01
TCGA-35-5375	FALSE	TRUE	-3.02
TCGA-55-7570	FALSE	TRUE	-3.05
TCGA-86-A4D0	FALSE	TRUE	-3.06
TCGA-78-7220	FALSE	TRUE	-3.06
GSM1672685	FALSE	TRUE	-3.06
TCGA-91-8499	FALSE	TRUE	-3.15
GSM1672676	FALSE	TRUE	-3.15
GSM1855220	FALSE	TRUE	-3.34
GSM1854872	FALSE	FALSE	3.87
GSM1672328	FALSE	FALSE	3.73
GSM1854935	FALSE	FALSE	3.71
GSM1672691	FALSE	FALSE	3.66
GSM1672357	FALSE	FALSE	3.64
TCGA-71-8520	FALSE	FALSE	3.59
GSM1855077	FALSE	FALSE	3.55
GSM1672556	FALSE	FALSE	3.46
GSM773670	FALSE	FALSE	3.46
TCGA-86-8279	FALSE	FALSE	3.44
TCGA-73-4668	FALSE	FALSE	3.41
GSM773638	FALSE	FALSE	3.4
GSM773728	FALSE	FALSE	3.4
TCGA-MP-A4TD	FALSE	FALSE	3.37
GSM1672524	FALSE	FALSE	3.35
GSM1672598	FALSE	FALSE	3.34
GSM773719	FALSE	FALSE	3.33
GSM773608	FALSE	FALSE	3.33
TCGA-55-A494	FALSE	FALSE	3.33
GSM1855119	FALSE	FALSE	3.28
TCGA-93-A4JN	FALSE	FALSE	3.27
TCGA-44-8120	FALSE	FALSE	3.26
TCGA-78-7161	FALSE	FALSE	3.23
GSM1854902	FALSE	FALSE	3.23
GSM1855209	FALSE	FALSE	3.22
GSM1672575	FALSE	FALSE	3.22
GSM1855195	FALSE	FALSE	3.21
TCGA-99-8025	FALSE	FALSE	3.2
GSM1855219	FALSE	FALSE	3.18
TCGA-50-5944	FALSE	FALSE	3.17
GSM1672480	FALSE	FALSE	3.16
TCGA-NJ-A55R	FALSE	FALSE	3.15
GSM1672488	FALSE	FALSE	3.13
TCGA-49-4512	FALSE	FALSE	3.13
TCGA-50-6593	FALSE	FALSE	3.12
GSM1854844	FALSE	FALSE	3.11
GSM1854936	FALSE	FALSE	3.11
GSM1672643	FALSE	FALSE	3.09
GSM1672710	FALSE	FALSE	3.08
GSM1672387	FALSE	FALSE	3.08
GSM773624	FALSE	FALSE	3.07
TCGA-05-4405	FALSE	FALSE	3.07
GSM1854911	FALSE	FALSE	3.06
GSM1855217	FALSE	FALSE	3.06
GSM773687	FALSE	FALSE	3.03
GSM773689	FALSE	FALSE	3.03
GSM773663	FALSE	FALSE	3
TCGA-50-5051	FALSE	FALSE	3
GSM773648	FALSE	FALSE	2.99
TCGA-78-7149	FALSE	FALSE	2.99
TCGA-50-6673	FALSE	FALSE	2.98
GSM773619	FALSE	FALSE	2.97
GSM773686	FALSE	FALSE	2.96
TCGA-55-8096	FALSE	FALSE	2.96
GSM1672596	FALSE	FALSE	2.94
GSM1672563	FALSE	FALSE	2.91
TCGA-97-7937	FALSE	FALSE	2.91
GSM1854870	FALSE	FALSE	2.91
GSM1854987	FALSE	FALSE	2.9
TCGA-97-A4M3	FALSE	FALSE	2.9
GSM773681	FALSE	FALSE	2.89
GSM1855075	FALSE	FALSE	2.89
GSM1672520	FALSE	FALSE	2.89
TCGA-78-7537	FALSE	FALSE	2.88
TCGA-55-8616	FALSE	FALSE	2.87
GSM1855126	FALSE	FALSE	2.87
GSM773632	FALSE	FALSE	2.86
TCGA-MP-A4TE	FALSE	FALSE	2.85
GSM773759	FALSE	FALSE	2.85
TCGA-44-A4SU	FALSE	FALSE	2.84
GSM1855188	FALSE	FALSE	2.84
GSM773631	FALSE	FALSE	2.83
GSM773762	FALSE	FALSE	2.83
GSM773609	FALSE	FALSE	2.82
GSM773752	FALSE	FALSE	2.82
GSM1672371	FALSE	FALSE	2.82
TCGA-62-8395	FALSE	FALSE	2.8
GSM1672687	FALSE	FALSE	2.8
TCGA-78-7153	FALSE	FALSE	2.79
GSM1854957	FALSE	FALSE	2.79
GSM1672504	FALSE	FALSE	2.78
GSM1854867	FALSE	FALSE	2.78
TCGA-55-7910	FALSE	FALSE	2.77
GSM1672574	FALSE	FALSE	2.77
GSM773614	FALSE	FALSE	2.76
TCGA-55-8207	FALSE	FALSE	2.74
TCGA-78-7167	FALSE	FALSE	2.73
GSM1854960	FALSE	FALSE	2.73
GSM1854864	FALSE	FALSE	2.73
GSM1854814	FALSE	FALSE	2.72
TCGA-86-8668	FALSE	FALSE	2.72
GSM1855059	FALSE	FALSE	2.72
GSM773713	FALSE	FALSE	2.71
GSM1672567	FALSE	FALSE	2.71
TCGA-49-4501	FALSE	FALSE	2.69
GSM1854811	FALSE	FALSE	2.68
GSM1672287	FALSE	FALSE	2.68
GSM1854852	FALSE	FALSE	2.67
GSM1672527	FALSE	FALSE	2.66
TCGA-44-6775	FALSE	FALSE	2.66
TCGA-44-6148	FALSE	FALSE	2.65
GSM1855124	FALSE	FALSE	2.64
TCGA-50-5942	FALSE	FALSE	2.64
GSM773691	FALSE	FALSE	2.64
GSM1854966	FALSE	FALSE	2.63
GSM1672466	FALSE	FALSE	2.63
GSM1854850	FALSE	FALSE	2.63
TCGA-55-8507	FALSE	FALSE	2.62
TCGA-78-7633	FALSE	FALSE	2.62
GSM773739	FALSE	FALSE	2.62
TCGA-86-8073	FALSE	FALSE	2.62
GSM1672605	FALSE	FALSE	2.61
GSM1855044	FALSE	FALSE	2.6
GSM773726	FALSE	FALSE	2.6
TCGA-78-7158	FALSE	FALSE	2.6
GSM1672639	FALSE	FALSE	2.6
TCGA-05-5428	FALSE	FALSE	2.59
GSM1672711	FALSE	FALSE	2.58
TCGA-75-7025	FALSE	FALSE	2.58
TCGA-97-7938	FALSE	FALSE	2.58
GSM773747	FALSE	FALSE	2.58
GSM1672398	FALSE	FALSE	2.57
GSM1672571	FALSE	FALSE	2.56
GSM1672557	FALSE	FALSE	2.56
TCGA-55-8097	FALSE	FALSE	2.56
TCGA-44-2666	FALSE	FALSE	2.55
GSM1855182	FALSE	FALSE	2.55
GSM773653	FALSE	FALSE	2.55
GSM1855159	FALSE	FALSE	2.54
GSM773708	FALSE	FALSE	2.54
GSM1855046	FALSE	FALSE	2.53
GSM1855034	FALSE	FALSE	2.53
GSM773712	FALSE	FALSE	2.53
GSM773595	FALSE	FALSE	2.53
GSM773755	FALSE	FALSE	2.52
GSM1672295	FALSE	FALSE	2.52
GSM1672516	FALSE	FALSE	2.52
GSM1855141	FALSE	FALSE	2.51
GSM1672673	FALSE	FALSE	2.51
GSM1672491	FALSE	FALSE	2.51
GSM1672511	FALSE	FALSE	2.51
GSM773684	FALSE	FALSE	2.51
TCGA-78-7535	FALSE	FALSE	2.5
TCGA-44-6776	FALSE	FALSE	2.5
GSM773744	FALSE	FALSE	2.5
TCGA-73-7498	FALSE	FALSE	2.49
GSM1672624	FALSE	FALSE	2.49
GSM1854919	FALSE	FALSE	2.49
GSM773758	FALSE	FALSE	2.49
GSM1672366	FALSE	FALSE	2.48
GSM1855057	FALSE	FALSE	2.48
GSM773688	FALSE	FALSE	2.48
GSM1672354	FALSE	FALSE	2.48
GSM1672489	FALSE	FALSE	2.48
TCGA-05-4426	FALSE	FALSE	2.47
TCGA-44-6147	FALSE	FALSE	2.47
TCGA-50-5935	FALSE	FALSE	2.47
TCGA-44-2659	FALSE	FALSE	2.47
TCGA-86-8280	FALSE	FALSE	2.47
GSM1672445	FALSE	FALSE	2.47
TCGA-97-7546	FALSE	FALSE	2.45
GSM773760	FALSE	FALSE	2.45
TCGA-05-5715	FALSE	FALSE	2.45
TCGA-64-1681	FALSE	FALSE	2.44
GSM773618	FALSE	FALSE	2.44
TCGA-L9-A7SV	FALSE	FALSE	2.44
TCGA-55-8087	FALSE	FALSE	2.44
GSM1855165	FALSE	FALSE	2.43
GSM1854843	FALSE	FALSE	2.43
GSM1672507	FALSE	FALSE	2.43
GSM773757	FALSE	FALSE	2.42
TCGA-NJ-A4YI	FALSE	FALSE	2.4
TCGA-L9-A50W	FALSE	FALSE	2.4
TCGA-MP-A5C7	FALSE	FALSE	2.4
TCGA-69-7764	FALSE	FALSE	2.39
GSM1854972	FALSE	FALSE	2.37
GSM773668	FALSE	FALSE	2.37
GSM1855187	FALSE	FALSE	2.37
TCGA-97-8171	FALSE	FALSE	2.36
TCGA-50-8460	FALSE	FALSE	2.36
GSM1672384	FALSE	FALSE	2.34
TCGA-97-7941	FALSE	FALSE	2.34
TCGA-53-A4EZ	FALSE	FALSE	2.33
TCGA-97-7547	FALSE	FALSE	2.33
TCGA-NJ-A55A	FALSE	FALSE	2.33
GSM1672443	FALSE	FALSE	2.32
GSM1672501	FALSE	FALSE	2.32
GSM1672514	FALSE	FALSE	2.32
GSM1855053	FALSE	FALSE	2.32
GSM1672604	FALSE	FALSE	2.31
GSM1854812	FALSE	FALSE	2.31
GSM1672333	FALSE	FALSE	2.31
GSM1672609	FALSE	FALSE	2.31
GSM1672382	FALSE	FALSE	2.31
GSM1854809	FALSE	FALSE	2.31
GSM1672595	FALSE	FALSE	2.3
GSM1855213	FALSE	FALSE	2.3
GSM1855099	FALSE	FALSE	2.3
GSM1855170	FALSE	FALSE	2.29
TCGA-86-7714	FALSE	FALSE	2.29
GSM773553	FALSE	FALSE	2.29
GSM1855113	FALSE	FALSE	2.28
TCGA-44-2655	FALSE	FALSE	2.28
GSM1855056	FALSE	FALSE	2.28
TCGA-62-8397	FALSE	FALSE	2.27
GSM1672327	FALSE	FALSE	2.27
GSM1854871	FALSE	FALSE	2.27
GSM1854839	FALSE	FALSE	2.27
TCGA-71-6725	FALSE	FALSE	2.27
GSM1854907	FALSE	FALSE	2.26
GSM1672344	FALSE	FALSE	2.26
GSM1672373	FALSE	FALSE	2.25
GSM1672568	FALSE	FALSE	2.25
GSM1855048	FALSE	FALSE	2.25
GSM1672464	FALSE	FALSE	2.25
GSM1672300	FALSE	FALSE	2.25
GSM1854851	FALSE	FALSE	2.25
GSM1854888	FALSE	FALSE	2.24
TCGA-55-A492	FALSE	FALSE	2.24
TCGA-50-8457	FALSE	FALSE	2.24
TCGA-55-6972	FALSE	FALSE	2.24
GSM1672542	FALSE	FALSE	2.23
TCGA-55-1592	FALSE	FALSE	2.23
GSM773623	FALSE	FALSE	2.22
GSM1672352	FALSE	FALSE	2.22
TCGA-78-7156	FALSE	FALSE	2.22
GSM1672637	FALSE	FALSE	2.21
GSM1855015	FALSE	FALSE	2.21
GSM1672441	FALSE	FALSE	2.21
GSM1672662	FALSE	FALSE	2.2
GSM1672361	FALSE	FALSE	2.2
GSM1854837	FALSE	FALSE	2.2
GSM1672622	FALSE	FALSE	2.2
GSM1672661	FALSE	FALSE	2.19
GSM773738	FALSE	FALSE	2.19
GSM1855169	FALSE	FALSE	2.19
TCGA-05-4249	FALSE	FALSE	2.18
GSM773735	FALSE	FALSE	2.18
TCGA-55-7573	FALSE	FALSE	2.17
TCGA-78-7143	FALSE	FALSE	2.17
GSM1672700	FALSE	FALSE	2.17
GSM1672460	FALSE	FALSE	2.16
GSM1854854	FALSE	FALSE	2.16
TCGA-75-5146	FALSE	FALSE	2.16
GSM1854863	FALSE	FALSE	2.15
TCGA-55-A4DG	FALSE	FALSE	2.15
GSM1854923	FALSE	FALSE	2.15
TCGA-75-6206	FALSE	FALSE	2.15
TCGA-67-4679	FALSE	FALSE	2.14
GSM1854807	FALSE	FALSE	2.13
TCGA-55-8512	FALSE	FALSE	2.13
TCGA-55-6543	FALSE	FALSE	2.13
GSM1672298	FALSE	FALSE	2.13
GSM773696	FALSE	FALSE	2.13
TCGA-62-A470	FALSE	FALSE	2.12
GSM773706	FALSE	FALSE	2.12
GSM773707	FALSE	FALSE	2.12
GSM1855111	FALSE	FALSE	2.11
GSM1672325	FALSE	FALSE	2.1
GSM1672476	FALSE	FALSE	2.1
TCGA-50-6597	FALSE	FALSE	2.09
TCGA-44-6146	FALSE	FALSE	2.09
GSM1672428	FALSE	FALSE	2.08
GSM1672359	FALSE	FALSE	2.07
GSM1672526	FALSE	FALSE	2.07
TCGA-75-6212	FALSE	FALSE	2.05
GSM1672616	FALSE	FALSE	2.04
GSM1672619	FALSE	FALSE	2.04
TCGA-55-8514	FALSE	FALSE	2.03
GSM1672521	FALSE	FALSE	2.03
GSM773732	FALSE	FALSE	2.03
GSM1672283	FALSE	FALSE	2.02
GSM1672485	FALSE	FALSE	2.02
GSM1672301	FALSE	FALSE	2.02
GSM1855151	FALSE	FALSE	2.01
GSM1672288	FALSE	FALSE	1.99
GSM773710	FALSE	FALSE	1.99
GSM1672448	FALSE	FALSE	1.99
TCGA-67-3770	FALSE	FALSE	1.99
GSM1672519	FALSE	FALSE	1.98
GSM1672316	FALSE	FALSE	1.98
GSM1672409	FALSE	FALSE	1.97
GSM1672509	FALSE	FALSE	1.97
TCGA-97-A4M6	FALSE	FALSE	1.97
GSM1672586	FALSE	FALSE	1.96
GSM1854958	FALSE	FALSE	1.96
GSM1672446	FALSE	FALSE	1.96
GSM1672407	FALSE	FALSE	1.94
TCGA-62-A46S	FALSE	FALSE	1.93
TCGA-05-4384	FALSE	FALSE	1.93
GSM1672695	FALSE	FALSE	1.92
TCGA-91-8497	FALSE	FALSE	1.92
GSM1672629	FALSE	FALSE	1.91
GSM1672360	FALSE	FALSE	1.9
GSM1672451	FALSE	FALSE	1.89
GSM773642	FALSE	FALSE	1.89
TCGA-97-8552	FALSE	FALSE	1.88
TCGA-MP-A4SW	FALSE	FALSE	1.88
GSM1672618	FALSE	FALSE	1.87
GSM1672431	FALSE	FALSE	1.87
GSM1855098	FALSE	FALSE	1.84
GSM1855082	FALSE	FALSE	1.83
GSM1672636	FALSE	FALSE	1.81
GSM1854821	FALSE	FALSE	1.81
TCGA-78-7163	FALSE	FALSE	1.81
GSM1855162	FALSE	FALSE	1.8
GSM1855088	FALSE	FALSE	1.78
GSM1672653	FALSE	FALSE	1.77
TCGA-O1-A52J	FALSE	FALSE	1.77
TCGA-44-5645	FALSE	FALSE	1.76
GSM1854920	FALSE	FALSE	1.76
TCGA-NJ-A55O	FALSE	FALSE	1.76
TCGA-05-4403	FALSE	FALSE	1.73
GSM1672429	FALSE	FALSE	1.72
GSM1672496	FALSE	FALSE	1.71
GSM1672641	FALSE	FALSE	1.7
GSM773554	FALSE	FALSE	1.69
GSM1672508	FALSE	FALSE	1.68
GSM773704	FALSE	FALSE	1.68
TCGA-69-8254	FALSE	FALSE	1.67
GSM773664	FALSE	FALSE	1.66
GSM1672572	FALSE	FALSE	1.66
GSM773714	FALSE	FALSE	1.66
GSM1854970	FALSE	FALSE	1.64
TCGA-55-7284	FALSE	FALSE	1.64
GSM1672523	FALSE	FALSE	1.63
GSM1672525	FALSE	FALSE	1.59
TCGA-78-7540	FALSE	FALSE	1.59
GSM1855158	FALSE	FALSE	1.57
GSM1855143	FALSE	FALSE	1.56
GSM1672425	FALSE	FALSE	1.56
GSM1854990	FALSE	FALSE	1.56
TCGA-MP-A4T6	FALSE	FALSE	1.53
GSM1672495	FALSE	FALSE	1.5
GSM1854934	FALSE	FALSE	1.48
TCGA-55-8206	FALSE	FALSE	1.46
TCGA-J2-A4AE	FALSE	FALSE	1.46
GSM773615	FALSE	FALSE	1.42
GSM1854917	FALSE	FALSE	1.37
GSM1854804	FALSE	FALSE	1.37
GSM1854898	FALSE	FALSE	1.27
TCGA-55-8513	FALSE	FALSE	1.24
GSM1855104	FALSE	FALSE	1.2
GSM1672474	FALSE	FALSE	1.14
GSM773607	FALSE	FALSE	0.96
GSM1855071	FALSE	FALSE	0.94
GSM1854803	FALSE	FALSE	0.4
GSM1672576	FALSE	TRUE	-0.24
GSM1855010	FALSE	TRUE	-0.53
TCGA-86-8671	FALSE	TRUE	-0.55
GSM1672587	FALSE	TRUE	-0.61
GSM1672548	FALSE	TRUE	-0.71
GSM1855005	FALSE	TRUE	-0.72
TCGA-55-7728	FALSE	TRUE	-0.77
TCGA-55-8619	FALSE	TRUE	-0.83
GSM1672579	FALSE	TRUE	-0.83
GSM1672528	FALSE	TRUE	-0.89
TCGA-99-AA5R	FALSE	TRUE	-0.93
GSM1855035	FALSE	TRUE	-0.97
TCGA-78-8648	FALSE	TRUE	-0.98
GSM1672531	FALSE	TRUE	-0.98
GSM1672601	FALSE	TRUE	-1
TCGA-86-A4P8	FALSE	TRUE	-1.03
TCGA-38-7271	FALSE	TRUE	-1.03
TCGA-99-8028	FALSE	TRUE	-1.08
GSM1854922	FALSE	TRUE	-1.08
GSM1672593	FALSE	TRUE	-1.1
GSM1854874	FALSE	TRUE	-1.11
GSM1854900	FALSE	TRUE	-1.11
TCGA-L4-A4E6	FALSE	TRUE	-1.11
TCGA-69-8453	FALSE	TRUE	-1.12
TCGA-S2-AA1A	FALSE	TRUE	-1.12
TCGA-55-8621	FALSE	TRUE	-1.14
GSM1854840	FALSE	TRUE	-1.15
GSM1672533	FALSE	TRUE	-1.15
GSM1855076	FALSE	TRUE	-1.15
TCGA-MP-A4TJ	FALSE	TRUE	-1.18
TCGA-97-7552	FALSE	TRUE	-1.18
TCGA-44-2657	FALSE	TRUE	-1.18
GSM1854836	FALSE	TRUE	-1.19
TCGA-50-5055	FALSE	TRUE	-1.19
TCGA-38-A44F	FALSE	TRUE	-1.19
GSM1672570	FALSE	TRUE	-1.2
GSM1855052	FALSE	TRUE	-1.21
TCGA-MP-A4TH	FALSE	TRUE	-1.21
GSM1672588	FALSE	TRUE	-1.21
TCGA-49-AARR	FALSE	TRUE	-1.21
TCGA-97-A4M2	FALSE	TRUE	-1.21
GSM1854884	FALSE	TRUE	-1.21
GSM1855229	FALSE	TRUE	-1.22
GSM1672536	FALSE	TRUE	-1.22
GSM1672606	FALSE	TRUE	-1.23
TCGA-93-7347	FALSE	TRUE	-1.23
GSM1672482	FALSE	TRUE	-1.24
GSM1854924	FALSE	TRUE	-1.24
GSM1672592	FALSE	TRUE	-1.26
GSM1855212	FALSE	TRUE	-1.27
GSM1854826	FALSE	TRUE	-1.27
GSM1672538	FALSE	TRUE	-1.27
GSM1854931	FALSE	TRUE	-1.27
GSM773629	FALSE	TRUE	-1.27
GSM1854842	FALSE	TRUE	-1.28
GSM1672498	FALSE	TRUE	-1.28
GSM1855004	FALSE	TRUE	-1.29
GSM1672522	FALSE	TRUE	-1.29
TCGA-97-A4LX	FALSE	TRUE	-1.3
GSM1672552	FALSE	TRUE	-1.3
GSM1672470	FALSE	TRUE	-1.3
TCGA-86-6851	FALSE	TRUE	-1.31
GSM1672497	FALSE	TRUE	-1.31
TCGA-L9-A444	FALSE	TRUE	-1.31
TCGA-55-8208	FALSE	TRUE	-1.31
TCGA-91-A4BC	FALSE	TRUE	-1.32
GSM1672285	FALSE	TRUE	-1.32
GSM1672284	FALSE	TRUE	-1.32
GSM1855003	FALSE	TRUE	-1.33
GSM1854951	FALSE	TRUE	-1.33
GSM1672424	FALSE	TRUE	-1.33
GSM1855093	FALSE	TRUE	-1.34
GSM1672427	FALSE	TRUE	-1.34
TCGA-97-8172	FALSE	TRUE	-1.34
GSM1672535	FALSE	TRUE	-1.35
TCGA-49-AARO	FALSE	TRUE	-1.35
GSM1854974	FALSE	TRUE	-1.36
TCGA-44-6778	FALSE	TRUE	-1.36
GSM1672281	FALSE	TRUE	-1.38
GSM1672423	FALSE	TRUE	-1.38
GSM1855091	FALSE	TRUE	-1.38
TCGA-91-6835	FALSE	TRUE	-1.38
GSM1855008	FALSE	TRUE	-1.39
TCGA-55-8510	FALSE	TRUE	-1.39
GSM1854819	FALSE	TRUE	-1.4
GSM1855055	FALSE	TRUE	-1.4
GSM1855031	FALSE	TRUE	-1.4
GSM1855127	FALSE	TRUE	-1.41
GSM1855092	FALSE	TRUE	-1.41
GSM773625	FALSE	TRUE	-1.42
GSM1855036	FALSE	TRUE	-1.42
GSM1854798	FALSE	TRUE	-1.43
TCGA-44-6777	FALSE	TRUE	-1.43
GSM773612	FALSE	TRUE	-1.43
TCGA-49-AAR0	FALSE	TRUE	-1.43
TCGA-95-A4VP	FALSE	TRUE	-1.43
TCGA-55-6971	FALSE	TRUE	-1.44
GSM1855110	FALSE	TRUE	-1.44
GSM1672292	FALSE	TRUE	-1.44
GSM1672553	FALSE	TRUE	-1.46
GSM1672484	FALSE	TRUE	-1.46
TCGA-97-7553	FALSE	TRUE	-1.46
GSM1854918	FALSE	TRUE	-1.46
GSM1672597	FALSE	TRUE	-1.46
TCGA-50-5049	FALSE	TRUE	-1.47
TCGA-86-A4P7	FALSE	TRUE	-1.47
GSM1855102	FALSE	TRUE	-1.47
TCGA-53-7626	FALSE	TRUE	-1.47
TCGA-44-A47G	FALSE	TRUE	-1.48
GSM1854833	FALSE	TRUE	-1.49
GSM1672532	FALSE	TRUE	-1.5
GSM1855105	FALSE	TRUE	-1.5
GSM1672506	FALSE	TRUE	-1.51
TCGA-97-A4M7	FALSE	TRUE	-1.51
GSM1855177	FALSE	TRUE	-1.52
GSM1854988	FALSE	TRUE	-1.54
GSM1672469	FALSE	TRUE	-1.54
GSM1672330	FALSE	TRUE	-1.54
GSM1854952	FALSE	TRUE	-1.54
GSM1855112	FALSE	TRUE	-1.54
GSM1672559	FALSE	TRUE	-1.55
GSM1672560	FALSE	TRUE	-1.55
GSM1672294	FALSE	TRUE	-1.56
TCGA-38-4626	FALSE	TRUE	-1.56
TCGA-05-4433	FALSE	TRUE	-1.57
TCGA-44-2661	FALSE	TRUE	-1.58
GSM1672603	FALSE	TRUE	-1.58
GSM1854994	FALSE	TRUE	-1.58
GSM1672600	FALSE	TRUE	-1.59
TCGA-55-8301	FALSE	TRUE	-1.59
GSM1854926	FALSE	TRUE	-1.59
GSM773709	FALSE	TRUE	-1.6
GSM1855007	FALSE	TRUE	-1.6
GSM1672403	FALSE	TRUE	-1.6
TCGA-97-A4M5	FALSE	TRUE	-1.6
GSM1672430	FALSE	TRUE	-1.6
TCGA-55-7281	FALSE	TRUE	-1.61
TCGA-NJ-A4YQ	FALSE	TRUE	-1.61
GSM773596	FALSE	TRUE	-1.61
GSM1672406	FALSE	TRUE	-1.62
TCGA-49-AAR2	FALSE	TRUE	-1.62
GSM1672530	FALSE	TRUE	-1.62
TCGA-55-6987	FALSE	TRUE	-1.62
GSM1672458	FALSE	TRUE	-1.62
GSM1854835	FALSE	TRUE	-1.64
GSM1854897	FALSE	TRUE	-1.65
GSM1854862	FALSE	TRUE	-1.66
GSM1672465	FALSE	TRUE	-1.66
GSM773654	FALSE	TRUE	-1.66
GSM1854930	FALSE	TRUE	-1.66
GSM773635	FALSE	TRUE	-1.66
GSM1855072	FALSE	TRUE	-1.67
GSM1854875	FALSE	TRUE	-1.68
GSM773662	FALSE	TRUE	-1.68
GSM1672505	FALSE	TRUE	-1.68
GSM1672396	FALSE	TRUE	-1.68
GSM1854985	FALSE	TRUE	-1.68
TCGA-55-7227	FALSE	TRUE	-1.68
TCGA-J2-A4AG	FALSE	TRUE	-1.69
GSM1854950	FALSE	TRUE	-1.69
TCGA-55-6983	FALSE	TRUE	-1.69
GSM1672372	FALSE	TRUE	-1.69
GSM1672312	FALSE	TRUE	-1.7
GSM1854848	FALSE	TRUE	-1.7
GSM773680	FALSE	TRUE	-1.7
TCGA-49-4505	FALSE	TRUE	-1.7
TCGA-44-A479	FALSE	TRUE	-1.7
GSM1855133	FALSE	TRUE	-1.7
GSM1855236	FALSE	TRUE	-1.7
GSM1672594	FALSE	TRUE	-1.71
GSM1672322	FALSE	TRUE	-1.71
GSM773567	FALSE	TRUE	-1.72
TCGA-97-A4M1	FALSE	TRUE	-1.72
GSM1855134	FALSE	TRUE	-1.72
TCGA-95-8039	FALSE	TRUE	-1.72
TCGA-62-A46U	FALSE	TRUE	-1.72
GSM1854834	FALSE	TRUE	-1.72
TCGA-73-4658	FALSE	TRUE	-1.73
GSM1672564	FALSE	TRUE	-1.73
GSM1672541	FALSE	TRUE	-1.73
GSM773561	FALSE	TRUE	-1.73
GSM1854977	FALSE	TRUE	-1.73
TCGA-97-A4M0	FALSE	TRUE	-1.73
GSM1672321	FALSE	TRUE	-1.73
TCGA-44-3919	FALSE	TRUE	-1.75
GSM773634	FALSE	TRUE	-1.75
TCGA-86-8076	FALSE	TRUE	-1.75
TCGA-55-8091	FALSE	TRUE	-1.75
GSM1855087	FALSE	TRUE	-1.76
TCGA-55-7995	FALSE	TRUE	-1.76
GSM1854999	FALSE	TRUE	-1.76
GSM1855061	FALSE	TRUE	-1.77
GSM1672565	FALSE	TRUE	-1.77
TCGA-69-7761	FALSE	TRUE	-1.77
GSM1855080	FALSE	TRUE	-1.77
GSM773721	FALSE	TRUE	-1.77
GSM773611	FALSE	TRUE	-1.77
TCGA-55-7816	FALSE	TRUE	-1.78
GSM1854962	FALSE	TRUE	-1.79
GSM1854808	FALSE	TRUE	-1.79
TCGA-05-4417	FALSE	TRUE	-1.79
GSM773711	FALSE	TRUE	-1.8
GSM1855040	FALSE	TRUE	-1.8
TCGA-05-4382	FALSE	TRUE	-1.81
GSM1672703	FALSE	TRUE	-1.81
GSM1854937	FALSE	TRUE	-1.81
TCGA-05-4430	FALSE	TRUE	-1.82
GSM1672539	FALSE	TRUE	-1.82
GSM1855070	FALSE	TRUE	-1.82
TCGA-67-6217	FALSE	TRUE	-1.82
GSM1854929	FALSE	TRUE	-1.83
TCGA-97-8177	FALSE	TRUE	-1.83
GSM1855149	FALSE	TRUE	-1.83
GSM1672547	FALSE	TRUE	-1.83
GSM1672291	FALSE	TRUE	-1.83
GSM1855011	FALSE	TRUE	-1.83
TCGA-67-6216	FALSE	TRUE	-1.84
GSM773606	FALSE	TRUE	-1.84
GSM1855086	FALSE	TRUE	-1.84
GSM773734	FALSE	TRUE	-1.84
GSM773763	FALSE	TRUE	-1.85
TCGA-99-7458	FALSE	TRUE	-1.85
GSM773657	FALSE	TRUE	-1.85
GSM773602	FALSE	TRUE	-1.85
GSM1672351	FALSE	TRUE	-1.85
TCGA-44-6774	FALSE	TRUE	-1.86
GSM1672415	FALSE	TRUE	-1.87
TCGA-55-A491	FALSE	TRUE	-1.87
GSM1672481	FALSE	TRUE	-1.87
GSM1855222	FALSE	TRUE	-1.87
GSM773705	FALSE	TRUE	-1.88
GSM1672655	FALSE	TRUE	-1.88
GSM1672472	FALSE	TRUE	-1.88
GSM1854806	FALSE	TRUE	-1.88
GSM773671	FALSE	TRUE	-1.88
GSM773750	FALSE	TRUE	-1.88
GSM773667	FALSE	TRUE	-1.89
GSM1855063	FALSE	TRUE	-1.89
TCGA-86-A456	FALSE	TRUE	-1.89
GSM1672319	FALSE	TRUE	-1.89
GSM1672704	FALSE	TRUE	-1.89
GSM773622	FALSE	TRUE	-1.89
TCGA-78-7539	FALSE	TRUE	-1.89
TCGA-78-7162	FALSE	TRUE	-1.89
GSM1854940	FALSE	TRUE	-1.9
GSM1672337	FALSE	TRUE	-1.9
GSM1854847	FALSE	TRUE	-1.9
TCGA-49-4487	FALSE	TRUE	-1.9
GSM1672394	FALSE	TRUE	-1.91
GSM773564	FALSE	TRUE	-1.91
GSM1672490	FALSE	TRUE	-1.91
GSM773737	FALSE	TRUE	-1.91
GSM1855106	FALSE	TRUE	-1.92
GSM1855129	FALSE	TRUE	-1.92
TCGA-86-7954	FALSE	TRUE	-1.92
GSM1855067	FALSE	TRUE	-1.92
GSM773761	FALSE	TRUE	-1.92
GSM1672400	FALSE	TRUE	-1.93
GSM1854813	FALSE	TRUE	-1.93
GSM1855183	FALSE	TRUE	-1.93
GSM1672326	FALSE	TRUE	-1.93
GSM1855214	FALSE	TRUE	-1.94
TCGA-55-6642	FALSE	TRUE	-1.95
GSM1672363	FALSE	TRUE	-1.95
GSM773695	FALSE	TRUE	-1.95
TCGA-91-A4BD	FALSE	TRUE	-1.95
TCGA-93-7348	FALSE	TRUE	-1.95
GSM1855172	FALSE	TRUE	-1.95
GSM1672705	FALSE	TRUE	-1.95
TCGA-55-8506	FALSE	TRUE	-1.96
GSM1672369	FALSE	TRUE	-1.96
GSM1854896	FALSE	TRUE	-1.97
GSM773594	FALSE	TRUE	-1.97
GSM773701	FALSE	TRUE	-1.97
TCGA-91-7771	FALSE	TRUE	-1.98
TCGA-62-8402	FALSE	TRUE	-1.98
TCGA-97-7554	FALSE	TRUE	-1.98
TCGA-91-6849	FALSE	TRUE	-1.98
TCGA-55-8620	FALSE	TRUE	-1.99
TCGA-55-6969	FALSE	TRUE	-1.99
GSM1672381	FALSE	TRUE	-1.99
TCGA-NJ-A4YG	FALSE	TRUE	-1.99
GSM773569	FALSE	TRUE	-2
GSM773620	FALSE	TRUE	-2
TCGA-67-3773	FALSE	TRUE	-2
GSM1855218	FALSE	TRUE	-2
GSM1672374	FALSE	TRUE	-2
GSM1854979	FALSE	TRUE	-2
GSM1672461	FALSE	TRUE	-2
GSM1672335	FALSE	TRUE	-2
GSM1854801	FALSE	TRUE	-2
GSM1855192	FALSE	TRUE	-2
TCGA-55-A48Z	FALSE	TRUE	-2.01
GSM1672379	FALSE	TRUE	-2.01
GSM773765	FALSE	TRUE	-2.01
TCGA-78-7152	FALSE	TRUE	-2.02
TCGA-73-4662	FALSE	TRUE	-2.02
GSM1672282	FALSE	TRUE	-2.02
TCGA-05-4432	FALSE	TRUE	-2.03
GSM773746	FALSE	TRUE	-2.03
GSM1672471	FALSE	TRUE	-2.03
GSM1672626	FALSE	TRUE	-2.03
GSM1855208	FALSE	TRUE	-2.04
GSM1854832	FALSE	TRUE	-2.04
GSM1854973	FALSE	TRUE	-2.05
GSM1855041	FALSE	TRUE	-2.05
TCGA-91-6840	FALSE	TRUE	-2.06
GSM1672405	FALSE	TRUE	-2.06
GSM1672420	FALSE	TRUE	-2.06
GSM1672513	FALSE	TRUE	-2.07
GSM1672320	FALSE	TRUE	-2.07
GSM773693	FALSE	TRUE	-2.07
GSM1672561	FALSE	TRUE	-2.08
TCGA-64-5778	FALSE	TRUE	-2.08
GSM773753	FALSE	TRUE	-2.08
GSM1854860	FALSE	TRUE	-2.08
TCGA-05-4389	FALSE	TRUE	-2.08
GSM1855054	FALSE	TRUE	-2.08
TCGA-91-6828	FALSE	TRUE	-2.08
TCGA-55-7907	FALSE	TRUE	-2.08
GSM773549	FALSE	TRUE	-2.08
GSM1854879	FALSE	TRUE	-2.09
TCGA-49-4510	FALSE	TRUE	-2.1
GSM773637	FALSE	TRUE	-2.1
TCGA-05-4422	FALSE	TRUE	-2.11
GSM1855221	FALSE	TRUE	-2.11
GSM1672686	FALSE	TRUE	-2.11
GSM1672290	FALSE	TRUE	-2.11
GSM1672478	FALSE	TRUE	-2.12
TCGA-05-5420	FALSE	TRUE	-2.13
GSM773652	FALSE	TRUE	-2.13
TCGA-44-8119	FALSE	TRUE	-2.13
GSM1672386	FALSE	TRUE	-2.13
TCGA-91-8496	FALSE	TRUE	-2.14
TCGA-05-4424	FALSE	TRUE	-2.14
GSM1672343	FALSE	TRUE	-2.15
TCGA-86-8669	FALSE	TRUE	-2.15
TCGA-67-3772	FALSE	TRUE	-2.15
GSM1672339	FALSE	TRUE	-2.16
GSM1855152	FALSE	TRUE	-2.16
TCGA-55-7283	FALSE	TRUE	-2.17
TCGA-44-7659	FALSE	TRUE	-2.17
TCGA-50-6592	FALSE	TRUE	-2.17
TCGA-99-8032	FALSE	TRUE	-2.18
TCGA-64-5779	FALSE	TRUE	-2.19
TCGA-44-A47B	FALSE	TRUE	-2.21
GSM1672289	FALSE	TRUE	-2.21
GSM1672612	FALSE	TRUE	-2.22
GSM1855100	FALSE	TRUE	-2.22
GSM773731	FALSE	TRUE	-2.22
GSM773685	FALSE	TRUE	-2.22
GSM773682	FALSE	TRUE	-2.22
GSM1854925	FALSE	TRUE	-2.23
TCGA-49-4514	FALSE	TRUE	-2.24
TCGA-55-8085	FALSE	TRUE	-2.24
GSM1672517	FALSE	TRUE	-2.24
GSM1854828	FALSE	TRUE	-2.24
GSM773690	FALSE	TRUE	-2.25
TCGA-4B-A93V	FALSE	TRUE	-2.25
TCGA-55-7576	FALSE	TRUE	-2.25
TCGA-86-8056	FALSE	TRUE	-2.26
TCGA-69-7765	FALSE	TRUE	-2.26
GSM1672656	FALSE	TRUE	-2.26
GSM1672690	FALSE	TRUE	-2.27
GSM1672645	FALSE	TRUE	-2.27
GSM773748	FALSE	TRUE	-2.28
GSM1672459	FALSE	TRUE	-2.29
TCGA-62-A46P	FALSE	TRUE	-2.29
TCGA-49-AARQ	FALSE	TRUE	-2.29
GSM1855081	FALSE	TRUE	-2.3
GSM1672562	FALSE	TRUE	-2.3
GSM1672631	FALSE	TRUE	-2.31
GSM1854996	FALSE	TRUE	-2.31
TCGA-05-5423	FALSE	TRUE	-2.31
TCGA-L9-A443	FALSE	TRUE	-2.32
GSM773733	FALSE	TRUE	-2.32
GSM773699	FALSE	TRUE	-2.34
GSM1672286	FALSE	TRUE	-2.34
GSM1672365	FALSE	TRUE	-2.35
GSM1854816	FALSE	TRUE	-2.35
GSM1672664	FALSE	TRUE	-2.38
GSM1855174	FALSE	TRUE	-2.38
GSM1855163	FALSE	TRUE	-2.38
GSM1672358	FALSE	TRUE	-2.38
GSM1672293	FALSE	TRUE	-2.38
GSM1855210	FALSE	TRUE	-2.38
TCGA-62-A46R	FALSE	TRUE	-2.39
GSM1672628	FALSE	TRUE	-2.39
TCGA-50-5068	FALSE	TRUE	-2.39
GSM1855069	FALSE	TRUE	-2.4
TCGA-78-8640	FALSE	TRUE	-2.4
GSM1672640	FALSE	TRUE	-2.41
TCGA-55-7914	FALSE	TRUE	-2.41
TCGA-55-A4DF	FALSE	TRUE	-2.41
GSM1672462	FALSE	TRUE	-2.42
GSM1855223	FALSE	TRUE	-2.42
GSM1854989	FALSE	TRUE	-2.43
TCGA-05-4427	FALSE	TRUE	-2.44
TCGA-50-7109	FALSE	TRUE	-2.44
TCGA-69-8255	FALSE	TRUE	-2.44
GSM1672677	FALSE	TRUE	-2.44
GSM1672615	FALSE	TRUE	-2.44
GSM1855074	FALSE	TRUE	-2.47
GSM1855164	FALSE	TRUE	-2.47
TCGA-49-4488	FALSE	TRUE	-2.47
GSM1672651	FALSE	TRUE	-2.49
GSM1672617	FALSE	TRUE	-2.5
GSM773698	FALSE	TRUE	-2.51
GSM1855215	FALSE	TRUE	-2.51
TCGA-44-2656	FALSE	TRUE	-2.54
GSM1672681	FALSE	TRUE	-2.54
GSM1672712	FALSE	TRUE	-2.55
TCGA-44-3918	FALSE	TRUE	-2.58
TCGA-78-7159	FALSE	TRUE	-2.59
TCGA-64-1676	FALSE	TRUE	-2.6
TCGA-91-6829	FALSE	TRUE	-2.6
GSM1672347	FALSE	TRUE	-2.6
TCGA-55-1594	FALSE	TRUE	-2.61
GSM1855200	FALSE	TRUE	-2.62
GSM1854800	FALSE	TRUE	-2.63
GSM1672654	FALSE	TRUE	-2.67
GSM1672349	FALSE	TRUE	-2.68
TCGA-55-7725	FALSE	TRUE	-2.69
GSM1672613	FALSE	TRUE	-2.7
GSM1854857	FALSE	TRUE	-2.73
GSM1672674	FALSE	TRUE	-2.75
GSM1672650	FALSE	TRUE	-2.77
GSM1672670	FALSE	TRUE	-2.82
TCGA-55-7727	FALSE	TRUE	-2.85
TCGA-53-7813	FALSE	TRUE	-2.95
TCGA-55-7815	FALSE	TRUE	-2.97
TCGA-78-7155	FALSE	TRUE	-3.49
TCGA-44-3917	FALSE	TRUE	-3.54
